# Supplementary material for: Insights into psychosis risk from leukocyte microRNA expression
Source: PubMed Central journal article supplement (PMC5290334; doi:10.1038/tp.2016.148), 2016-12-13
Supplement: tp2016148x1.pdf [file tp2016148x1.pdf]

duplicate study results in DB1386 (frozen over all samples)  
selection of 25 or more in C563  
selection of 98 useful samples starts A563  
quotients start in A1105  
z-scores start in A1379

consistent sign test in GX1935

All 101 samples X 530 miRNAs 2.44E-04

30 UCs, 39 CHR-NPs, 32 CHR-Ps->29, 38, 31  
counts shown are exact matches + inclusions

thresholds = 0.5498, corresponding to 2E-3

each miR ranked by total reads 530 miRs, 101 samples

Macro "rand\_labels" randomly relabels all 101 samples.

530 mature miRNAs:

| ID          |                          |
|-------------|--------------------------|
| miR-486-5p  | TCCTGTACTGAGCTGCCCGAG    |
| miR-92a-3p  | TATTGCACTTGTCCCGCCTGT    |
| miR-191-5p  | CAACGGAATCCCAAAAGCAGCTG  |
| miR-150-5p  | TCTCCAACCCTTGTACCAGTG    |
| let-7a-5p   | TGAGGTAGTAGGTTGTATAGTT   |
| miR-181a-5p | AACATTCAACGCTGTCGGTGAGT  |
| miR-16-5p   | TAGCAGCACGTAAATATTGGCG   |
| miR-26a-5p  | TTCAAGTAATCCAGGATAGGCT   |
| miR-451a    | AAACCGTTACCATTACTGAGTT   |
| miR-22-3p   | AAGCTGCCAGTTGAAGAACTGT   |
| miR-25-3p   | CATTGCACTTGTCTCGGTCTGA   |
| let-7i-5p   | TGAGGTAGTAGTTTGTGCTGTT   |
| miR-30d-5p  | TGTAAACATCCCCGACTGGAAG   |
| let-7g-5p   | TGAGGTAGTAGTTTGTACAGTT   |
| let-7b-5p   | TGAGGTAGTAGGTTGTGTGGTT   |
| let-7f-5p   | TGAGGTAGTAGATTGTATAGTT   |
| miR-423-3p  | AGCTCGGTCTGAGGCCCTCAGT   |
| miR-26b-5p  | TTCAAGTAATCCAGGATAGGT    |
| miR-103a-3p | AGCAGCATTGTACAGGGCTATGA  |
| miR-186-5p  | CAAAGAATTCTCTTTTGGGCT    |
| miR-28-3p   | CACTAGATTGTGAGCTCCTGGA   |
| miR-378a-3p | ACTGGACTTGGAGTCAGAAGG    |
| miR-93-5p   | CAAAGTGCTGTTTCGTGCAGGTAG |
| miR-148a-3p | TCAGTGCACACTACAGAACTTTGT |
| miR-223-3p  | TGTCAGTTTGTCAAATACCCCA   |
| miR-146b-5p | TGAGAACTGAATTCCATAGGCT   |
| miR-140-3p  | TACCACAGGGTAGAACCACGG    |
| miR-320a    | AAAAGCTGGGTTGAGAGGGCGA   |
| miR-182-5p  | TTTGGAATGGTAGAACTCACACT  |
| miR-151b    | TCGAGGAGCTCACAGTCT       |
| miR-148b-3p | TCAGTGCATCACAGAACTTTGT   |
| miR-30c-5p  | TGTAAACATCCTACACTCTCAGC  |
| let-7d-5p   | AGAGGTAGTAGGTTGCATAGTT   |
| miR-30e-5p  | TGTAAACATCCTTACTGGAAG    |
| miR-21-5p   | TAGCTTATCAGACTGATGTTGA   |
| miR-151a-5p | TCGAGGAGCTCACAGTCTAGT    |
| miR-15b-5p  | TAGCAGCACATCATGGTTTACA   |
| miR-151a-3p | CTAGACTGAAGCTCCTTGAGG    |
| miR-146a-5p | TGAGAACTGAATTCCATGGGTT   |
| miR-941     | CACCCGGCTGTGTGCACATGTGC  |
| miR-423-5p  | TGAGGGGCAGAGCGGAGACTTT   |
| miR-197-3p  | TTACCACCTTCTCCACCCAGC    |
| miR-181b-5p | AACATTCAATTGCTGTCGGTGGGT |
| miR-484     | TCAGGCTCAGTCCCCTCCCGAT   |
| miR-192-5p  | CTGACCTATGAATTGACAGCC    |
| miR-342-3p  | TCTCACACAGAAATCGCACCCGT  |

AGCTACATCTGGCTACTGGGT  
TTCACAGTGGCTAAGTTCTGC  
TCTCTCGGCTCCTCGCGGCTC  
GGATATCATCATATACTGTAAAG  
TGAGATGAAGCACTGTAGCTC  
TCGGATCCGTCTGAGCTTGGCT  
ATCACATTGCCAGGGATTTCC  
AATGGCGCCACTAGGGTTGTG  
CTTTCAGTCCGATGTTTACAGC  
CAACACCAGTCGATGGGCTGT  
TACAGTACTGTGATAACTGAA  
AATGACACGATCACTCCCGTTGA  
AACATTCAACCTGTCCGGTGAGT  
TTAATGCTAATCGTGATAGGGGT  
TCCCTGAGACCCTTAACCTGTGA  
AGCTACATTGTCTGCTGGGTTTC  
TGAGACCTCTGGGTCTGAGCT  
CATTATTACTTTTGGTACGCG  
CATAAAGTAGAAAGCACTACT  
GCCCTGACCTGTCTGTTCTG  
CAAAGTGCTTACAGTGCAGGTAG  
TGTAACATCCTACACTCAGCT  
TAAAGTGCTTATAGTGCAGGTAG  
TGGCTCAGTTCAGCAGGAACAG  
TATGGCACTGGTAGAATTCCT  
CTATACGACCTGCTGCCTTTCT  
CGGGGCAGCTCAGTACAGGAT  
TGAGGTAGTAAGTTGTATTGTT  
CATGCCCTTGAGTGTAGGACCGT  
TAGCACCATCTGAAATCGGTTA  
GAAATGTTGCTCGGTGAACCCCT  
ATGCACCTGGGCAAGGATTCTG  
CACCCGTAGAACCAGCCTTGCG  
TGCGGGGCTAGGGCTAACAGCA  
ATCACATTGCCAGGGATTACC  
AATTGCACGGTATCCATCTGTA  
ACTCGGCGTGGCGTCCGGTCTG  
TATTGCACTCGTCCCGCCTCC  
TTATAAAGCAATGAGACTGATT  
TTCACAGTGGCTAAGTTCCGC  
CCTCTGGGCCCTTCCCTCCAG  
CTGGCCCTCTCTGCCCTTCCGT  
TCGTACCGTGAGTAATAATGCG  
TCACAGTGAACCGGTCTCTTT  
TGAGGTAGGAGTTGTATAGTT  
ACCCTGACCGTTGACTGTACC  
TACAGTATAGATGATGTACT  
GCTGACTCCTAGTCCAGGGCTC  
CAGTGCAATGTTAAAAGGGCAT  
TAGCAGCACATAATGGTTTGTG  
AAGGAGCTCACAGTCTATTGAG  
TCCGGTTCTCAGGGCTCCACC  
CCGCACTGTGGGTACTTGCTGC  
TGCCCTGTGGACTCAGTTCTGG  
TAGTGCAATATTGCTTATAGGGT  
GCCCTGGGCCCTATCCTAGAA  
CAGTGCAATGATGAAAGGGCAT  
AGGGGTGCTATCTGTGATTGA  
TACCCTGTAGATCCGAATTTGTG

miR-222-3p  
miR-27b-3p  
miR-3615  
miR-144-5p  
miR-143-3p  
miR-127-3p  
miR-23a-3p  
miR-652-3p  
miR-30e-3p  
miR-21-3p  
miR-101-3p  
miR-425-5p  
miR-181c-5p  
miR-155-5p  
miR-125a-5p  
miR-221-3p  
miR-769-5p  
miR-126-5p  
miR-142-5p  
miR-4732-3p  
miR-17-5p  
miR-30b-5p  
miR-20a-5p  
miR-24-3p  
miR-183-5p  
let-7d-3p  
miR-486-3p  
miR-98-5p  
miR-532-5p  
miR-29a-3p  
miR-409-3p  
miR-500a-3p  
miR-99b-5p  
miR-744-5p  
miR-23b-3p  
miR-363-3p  
miR-1307-3p  
miR-92b-3p  
miR-340-5p  
miR-27a-3p  
miR-326  
miR-328  
miR-126-3p  
miR-128  
let-7e-5p  
miR-181a-2-3p  
miR-144-3p  
miR-345-5p  
miR-130a-3p  
miR-15a-5p  
miR-28-5p  
miR-671-3p  
miR-106b-3p  
miR-146b-3p  
miR-454-3p  
miR-331-3p  
miR-130b-3p  
miR-342-5p  
miR-10a-5p

|                          |             |
|--------------------------|-------------|
| TGTAACAGCAACTCCATGTGGA   | miR-194-5p  |
| TACCCATTGCATATCGGAGTTG   | miR-660-5p  |
| ACCCCACTCCTGGTACC        | miR-4286    |
| TTATCAGAATCTCCAGGGGTAC   | miR-361-5p  |
| TAAAGTGCTGACAGTGCAGAT    | miR-106b-5p |
| TGGAGAGAAAGGCAGTTCCTGA   | miR-185-5p  |
| ACCATCGACCGTTGATTGTACC   | miR-181a-3p |
| TCCCCCAGGTGTGATTCTGATTT  | miR-361-3p  |
| GTCCAGTTTTTCCCAGGAATCCCT | miR-145-5p  |
| CAAAGTGCTCATAGTGCAGGTAG  | miR-20b-5p  |
| AGGCAAGATGCTGGCATTAGCT   | miR-31-5p   |
| TGAGGTAGTAGGTTGTATGGTT   | let-7c      |
| TGTAAACATCCTCGACTGGAAG   | miR-30a-5p  |
| ACAGTAGTCTGCACATTGGTTA   | miR-199a-3p |
| ACAGTAGTCTGCACATTGGTTA   | miR-199b-3p |
| TATTCATTTATCCCCAGCCTACA  | miR-664a-3p |
| ACTGCCCCAGGTGCTGCTGG     | miR-324-3p  |
| TAAAGTCTACAGCCATGGTCCG   | miR-132-3p  |
| AATATAACACAGATGGCCTGT    | miR-410     |
| AAAGTTCTGAGACACTCCGACT   | miR-148a-5p |
| TGTAGTGTTCCTACTTTATGGA   | miR-142-3p  |
| ACTCTTTCCCTGTTGCACTAC    | miR-130b-5p |
| CTGCCCCTGGCCCCGAGGGACCGA | miR-874     |
| TGAGCGCCTCGACGACAGAGCCC  | miR-339-3p  |
| ACTCCAGCCCCACAGCCTCAGC   | miR-766-3p  |
| TGGGTCTTTGCGGGCGAGATGA   | miR-193a-5p |
| AATGCACCCGGGCAAGGATTCT   | miR-501-3p  |
| CCTGTTCTCCATTACTTGGCTC   | miR-26b-3p  |
| CCCAGTGTTCCAGACTACCTGTTC | miR-199a-5p |
| CACGCTCATGCACACACCCACA   | miR-574-3p  |
| TCGACCGGACCTCGACCGCT     | miR-1307-5p |
| AACATTCATTGTTGTCGGTGGGT  | miR-181d    |
| TGGGTTTACGTTGGGAGAACT    | miR-629-5p  |
| CTGTGCGTGTGACAGCGGCTGA   | miR-210     |
| AAGTTCTGTTATACACTCAGGC   | miR-148b-5p |
| ATCGGGAATGTCGTGTCGCCC    | miR-425-3p  |
| TGAGAACCACGTCTGCTCTGAG   | miR-589-5p  |
| ACTGCTGAGCTAGCACTTCCCG   | miR-93-3p   |
| GTAGAGGAGATGGCGCAGGG     | miR-877-5p  |
| TCCGTCTCAGTTACTTTATAGC   | miR-340-3p  |
| TGTGCAAATCCATGCAAACTGA   | miR-19b-3p  |
| TTTCCGGCTCGCGTGGGTGTGT   | miR-1180    |
| CAAACGTGAGGCCTGCTAT      | miR-424-3p  |
| ATCAACAGACATTAATTGGGCGC  | miR-421     |
| TCTTCTCTGTTTTGGCCATGTG   | miR-942     |
| CCTCCCACACCCAAGGCTTGCA   | miR-532-3p  |
| CGTGATTTGACAAGCTGAGTT    | miR-223-5p  |
| AAAAGTGCTTACAGTGCAGGTAG  | miR-106a-5p |
| TATACAAGGGCAAGCTCTCTGT   | miR-381-3p  |
| TGTCCTCTAGGGCCTGCAGTCT   | miR-3909    |
| ACTGTAAACGCTTTCTGATG     | miR-3607-3p |
| TTTTGTGTCTCCCATTTCCCAG   | miR-5010-3p |
| AATCCTTGGAACCTAGGTGTGAGT | miR-362-5p  |
| TCTACAGTGCACGTGTCTCCAGT  | miR-139-5p  |
| TCCCTGTCCTCCAGGAGCTCACG  | miR-339-5p  |
| GGCGGGTGCGGGGTGG         | miR-3656    |
| CAGTGCAATAGTATTGTCAAAGC  | miR-301a-3p |
| CGTCAACACTTGCTGGTTTCCT   | miR-505-3p  |
| TTGGGGAAACGGCCGCTGAGTG   | miR-2110    |

|                          |               |
|--------------------------|---------------|
| CAGTGGTTTTACCCCTATGGTAG  | miR-140-5p    |
| TCCAGCATCAGTGATTTTGTG    | miR-338-3p    |
| CCTCCTGCCCTCCTTGCTGT     | miR-1976      |
| TAATACTGCCGGTAATGATGGA   | miR-200c-3p   |
| AATGGATTTTTGGAGCAGG      | miR-1246      |
| TAGCACCATTTGAAATCGGTTA   | miR-29c-3p    |
| CACCTTGCGCTACTCAGGTCTG   | miR-3200-3p   |
| AAACTCTACTTGTCCCTTCTGAGT | miR-618       |
| TAGGTAGTTTTCCCTGTTGTTGGG | miR-196b-5p   |
| CTCCGTTTGCCTGTTTCGCTG    | miR-1468      |
| TCTAGTAAGAGTGGCAGTCEA    | miR-628-3p    |
| CCCAGTGTTTAGACTATCTGTTT  | miR-199b-5p   |
| ACGCCCTTCCCCCCTTCTTCA    | miR-1249      |
| TGTGACTGGTTGACCAGAGGGG   | miR-134       |
| TCAGTGCATGACAGAACTTGG    | miR-152       |
| CTCCTGACTCCAGGTCTCTGTGT  | miR-378a-5p   |
| GTCATACACGGCTCTCCTCTCT   | miR-485-3p    |
| TGTTCTCTGTCTCCAGAC       | miR-4326      |
| AAAAGTACTTGCGGATTT       | miR-548av-5p  |
| TCTTGGAGTAGGTCATTGGGTGG  | miR-432-5p    |
| ATTCTAATTTCTCCACGTCTTT   | miR-576-5p    |
| CAGGGCTGGCAGTGACATGGGT   | miR-4446-3p   |
| AGGCGGAGACTTGGGCAATTG    | miR-25-5p     |
| AAAAGTACTTGCGGATTTTGCT   | miR-548k      |
| TTGTACATGGTAGGCTTTCATT   | miR-493-5p    |
| AGGGGAAAGTTCTATAGTCC     | miR-625-5p    |
| ACCTGGCATACAATGTAGATTT   | miR-221-5p    |
| GAGTTCTACAGTCAGAC        | miR-3168      |
| ATATAATACAACCTGCTAAGTG   | miR-374b-5p   |
| AGCAGCATTGTACAGGGCTATCA  | miR-107       |
| CCTCCGTGTTACCTGTCTCTAG   | miR-3605-3p   |
| TTATGGTTTTGCCTGGGACTGAG  | miR-584-5p    |
| TCCCTGAGACCCTAACTTGTGA   | miR-125b-5p   |
| TAAGTGGTTGAACAACCTGAACC  | miR-582-3p    |
| AAGGGCTTCCCTCTCTGCAGGAC  | miR-3158-3p   |
| CGCATCCCCTAGGGCATTGGTGT  | miR-324-5p    |
| ACTGGCCTGGGACTACCGG      | miR-3176      |
| GGGGTTCTGGGGATGGGATTT    | miR-23a-5p    |
| CAAGTCACTAGTGGTTCCGTT    | miR-224-5p    |
| TGAGTGTGTGTGTGTGAGTGTGT  | miR-574-5p    |
| TGAGGAGATCGTCGAGGTTGG    | miR-3150b-3p  |
| TAAGGTGCATCTAGTGCAGATAG  | miR-18a-5p    |
| GCCTGCTGGGGTGAACCTGGT    | miR-370       |
| AGTGCCCTGAGGGAGTAAGAG    | miR-550a-3-5p |
| TCAGAACAATGCCGGTTCCCAGA  | miR-589-3p    |
| TTTGGTCCCCTTCAACCAGCTG   | miR-133a      |
| TGTAGAGCAGGGAGCAGGAAGCT  | miR-4732-5p   |
| CAGCCCCACAGCCTCAGA       | miR-4323      |
| ACTCAAAAAGATGGCGGCACTTT  | miR-371b-5p   |
| TAGTAGACCGTATAGCGTACG    | miR-411-5p    |
| CCTCACCATCCCCTTCTGCCTGC  | miR-6511a-3p  |
| TCTGGGCAACAAGTGAGACCT    | miR-1285-3p   |
| CTGGGAGAGGGTTGTTACTCC    | miR-30c-1-3p  |
| TCTCTGGGCCTGTGTCTTAGGC   | miR-330-5p    |
| AGGGCTTAGCTGTGTGTGAGCA   | miR-27a-5p    |
| TGATATGTTTGTATATATTAGGT  | miR-190a      |
| TCAGCTACTACCTCTATTAGG    | miR-5690      |
| AACCCGTAGATCCGAACCTGTG   | miR-100-5p    |
| ACTGCCCTAAGTGCTCCTTCTGG  | miR-18a-3p    |



|                          |              |
|--------------------------|--------------|
| CTGTACAGGCCACTGCCTTGC    | let-7g-3p    |
| AATCCTTTGTCCCTGGGTGAGA   | miR-501-5p   |
| TGTCTTGCAGGCCGTCATGCA    | miR-431-5p   |
| AGGTTGGGATCGGTTGCAATGCT  | miR-92a-1-5p |
| AAAAGCTGGGTTGAGAGGGCAA   | miR-320b     |
| GGGAGAAGGGTCGGGGC        | miR-4516     |
| TTGCAGCTGCCTGGGAGTACTTC  | miR-1301     |
| AATCCTTGCTACCTGGGT       | miR-500b     |
| TTTTTCATTATTGCTCCTGACC   | miR-335-3p   |
| CCGGTCCCAGGAGAACCTGCAGA  | miR-4746-5p  |
| TTATAATACAACCTGATAAGTG   | miR-374a-5p  |
| TTAGGGCCCTGGCTCCATCTCC   | miR-1296     |
| ACTGCAGTGAAGGCACTTGTAG   | miR-17-3p    |
| AGGGCCCCCCTCAATCCTGT     | miR-296-5p   |
| AACTGGCCCTCAAAGTCCCGCT   | miR-193b-3p  |
| TTACAGTTGTTCAACCAGTTACT  | miR-582-5p   |
| TGCCTACTGAGCTGAAACACAG   | miR-24-2-5p  |
| TGTCTTACTCCCTCAGGCACAT   | miR-550a-3p  |
| GAAGTTGTTTCGTGGTGGATTCCG | miR-382-5p   |
| CTGCGCAAGCTACTGCCTTGCT   | let-7i-3p    |
| CGAATCATTATTTGCTGCTCTA   | miR-15b-3p   |
| TAATGCCCCCTAAAAATCCTTAT  | miR-365a-3p  |
| TAATGCCCCCTAAAAATCCTTAT  | miR-365b-3p  |
| ATCATGATGGGCTCCTCGGTGT   | miR-433      |
| CGTGCCACCCTTTTCCCCAG     | miR-1227-3p  |
| AATGCACCTGGGCAAGGATTCA   | miR-502-3p   |
| AATCGTACAGGGTCATCCACTT   | miR-487b     |
| TAATACTGCCTGGTAATGATGA   | miR-200b-3p  |
| TCGGGGATCATCATGTACGAGA   | miR-542-5p   |
| TGATATGTTTGATATTGGGTT    | miR-190b     |
| AACTCTGAGAAGGCGCACAAAGGT | miR-3200-5p  |
| CGGGCGTGGTGGTGGGGG       | miR-1268a    |
| CATCAGAATTCATGGAGGCTAG   | miR-2115-3p  |
| ACCTGGACCCAGCGTAGACAAAG  | miR-3690     |
| GACTATAGAACTTTCCCCCTCA   | miR-625-3p   |
| TAATCCTTGCTACCTGGGTGAGA  | miR-500a-5p  |
| TGTGCAAATCTATGCAAACTGA   | miR-19a-3p   |
| CTGGTTTACATGGTGGCTTAG    | miR-29b-2-5p |
| AAAAGCTGCAGTTACTTTTGC    | miR-548av-3p |
| AAAAGCTGGGTTGAGAGGA      | miR-320d     |
| TGTGCTTGCTCGTCCCGCCCGCA  | miR-636      |
| CCAAAAGCTGCAGTTACTTTTGC  | miR-548o-3p  |
| CAAGCTCGTGTCTGTGGGTCCG   | miR-99b-3p   |
| CGGCGGGGACGGCGATTGGTC    | miR-1908     |
| CATCCCTTGCTGGTGGAGGG     | miR-188-5p   |
| ACGTTGGCTCTGGTGGTG       | miR-1306-3p  |
| CTTATCAGATTGTATTGTAATT   | miR-374a-3p  |
| GTGGGGGAGAGGCTGTC        | miR-1275     |
| CCTCACCACCCCTTCTGCCTGCA  | miR-6511b-3p |
| GCGGGGCTGGGCGCGCG        | miR-4508     |
| AAACATTGCGGGTGCCTTCTT    | miR-543      |
| AGGACCTTCCCTGAACCAAGGA   | miR-659-5p   |
| TGGAAGACTAGTGATTTTGTGT   | miR-7-5p     |
| TTCATTTGCCTCCCAGCCTACA   | miR-664b-3p  |
| AAAAGTAATTGCGGTCTTT      | miR-548ap-5p |
| TCTCACTGTAGCCTCGAACCCC   | miR-1304-3p  |
| AAAAGCTGGGTTGAGAGGGT     | miR-320c     |
| CCTGCAACTTTGCCTGATCAGA   | miR-4772-3p  |
| TCACCAGCCCTGTGTCCCTAG    | miR-1226-3p  |

|                          |              |
|--------------------------|--------------|
| AGAGGTTGCCCTTGGTGAATTC   | miR-377-5p   |
| TGCTGGATCAGTGGTTCGAGTC   | miR-1287     |
| TGAAGGTCTACTGTGTGCCAGG   | miR-493-3p   |
| AGTTGCCAGGGCTGCCTTTGGT   | miR-6501-5p  |
| ATCCCACCACTGCCACCAT      | miR-1260b    |
| TGCACGGCACTGGGGACACGT    | miR-3177-3p  |
| AAAAGTAATTGCGGTCTTTGGT   | miR-548j     |
| CACATTACACGGTCGACCTCT    | miR-323a-3p  |
| TTTGGCACTAGCACATTTTTGCT  | miR-96-5p    |
| ATGCTGACATATTTACTAGAGG   | miR-628-5p   |
| AACCCGTAGATCCGATCTTGTG   | miR-99a-5p   |
| CCACCTCCCCTGCAAACGTCCA   | miR-1306-5p  |
| TACGTCATCGTTGTCATCGTCA   | miR-598      |
| CTAAGAAGTTGACTGAAG       | miR-3653     |
| TGGTGGGCCGAGAACATGTGC    | miR-654-5p   |
| ACCCTATCAATATTGTCTCTGC   | miR-454-5p   |
| ATGGCCAGAGCTCACACAGAGG   | miR-4435     |
| AGGAAGCCCTGGAGGGGCTGGAG  | miR-671-5p   |
| AAGGCAGGGCCCCGCTCCCC     | miR-940      |
| TGAAACATACACGGGAAACCTC   | miR-494      |
| AGAGGCTGGCCGTGATGAATTC   | miR-485-5p   |
| CTGGGAGGTGGATGTTTACTTC   | miR-30b-3p   |
| GGAGGAACCTTGGAGCTTCGGC   | miR-3928     |
| GTGAGGACTCGGGAGGTGG      | miR-1224-5p  |
| AGAGCTTAGCTGATTGGTGAAC   | miR-27b-5p   |
| GGGAGCCAGGAAGTATTGATGT   | miR-505-5p   |
| GTCCCTCTCCAAATGTGTCTTG   | miR-642a-5p  |
| CGGCTCTGGGTCTGTGGGGA     | miR-760      |
| AGTGGGGAACCCCTCCATGAGG   | miR-491-5p   |
| CAGCAGCACACTGTGTTTTGT    | miR-497-5p   |
| AGAGTTGAGTCTGGACGTCCCG   | miR-219-1-3p |
| TCTGTGAGACCAAGAATACT     | miR-4677-3p  |
| CAGTGCAATGATATTGTCAAAGC  | miR-301b     |
| TATGGAAAGACTTTGCCACTCT   | miR-3688-3p  |
| TCAAGTGTCTATCTGTCCCTAG   | miR-6513-3p  |
| TCTCCCTTCCCTGCCCTGGCTAG  | miR-4685-3p  |
| TAGTGGTCAGAGGGCTTATGA    | miR-6718-5p  |
| CTGGGATCTCCGGGGTCTTGGTT  | miR-769-3p   |
| AGGTCTGCATTCAAATCCCCAGA  | miR-6503-5p  |
| AGCGCGGGCTGAGCGCTGCCAGTC | miR-2277-5p  |
| CTTTCAGTCAGATGTTTGCTGC   | miR-30d-3p   |
| ACTGGGCTTGGAGTCAGAAG     | miR-378g     |
| CAGGTCGTCTTGACAGGGCTTCT  | miR-431-3p   |
| CTCCTGGGGCCCCGACTCTCGC   | miR-1343     |
| TTTGTGACCTGGTCCACTAACC   | miR-758-3p   |
| AGCCCGCCCCAGCCGAGGTTCT   | miR-4707-3p  |
| GTTCCTGCTGAACTGAGCCAG    | miR-3074-5p  |
| CGGATGAGCAAAGAAAGTGGTT   | miR-1255b-5p |
| TCACCCTGCATCCCGACCCAG    | miR-3620-3p  |
| GCTGGTTTCATATGGTGGTTTAGA | miR-29b-1-5p |
| CTCTCACCCTGCCCTCCCACAG   | miR-1229-3p  |
| TAGCACCATTTGAAATCAGTGTT  | miR-29b-3p   |
| TGCCCTGCCTGTTTTCTCCTTT   | miR-3173-5p  |
| ATCCCCAGATAACAATGGACAA   | miR-2355-5p  |
| CTGCCCTAGCTAGCTGAAGCT    | miR-3157-3p  |
| ACTGGACTTGGAGCCAGAAG     | miR-378f     |
| TGAGCCCTGTCTCCCGCAG      | miR-1233-3p  |
| CTTGGCACCTAGCAAGCACTCA   | miR-1271-5p  |
| CTGGAGATATGGAAGAGCTGTGT  | miR-1270     |

|                          |               |
|--------------------------|---------------|
| CTTTCAGTCGGATGTTTGCAGC   | miR-30a-3p    |
| GCTGCGCTTGGATTTCGTCCCC   | miR-191-3p    |
| ACTGGACTTGGAGGCAGAA      | miR-378b      |
| GCAAAGCACACGGCCTGCAGAGA  | miR-330-3p    |
| CCACTTGGATCTGAAGGCTGCCC  | miR-3614-5p   |
| ACAGGTGAGGTTCTTGGGAGCC   | miR-125a-3p   |
| TTGGCCATGGGGCTGCGCGG     | miR-3187-3p   |
| TTAATATCGGACAACCATTGT    | miR-889       |
| ATCCTTGCTATCTGGGTGCTA    | miR-502-5p    |
| TAACAGTCTCCAGTCACGGCC    | miR-212-3p    |
| TGACAGCGCCCTGCCTGGCTC    | miR-2277-3p   |
| GGGACTAGGATGCAGACCTCC    | miR-6503-3p   |
| TTCCCTTTGTCTATCCTATGCCT  | miR-204-5p    |
| CAGCAGCAATTTCATGTTTTGAA  | miR-424-5p    |
| GGAGACTGATGAGTTCCCGGGA   | miR-873-3p    |
| AGCTTCTTTACAGTGTGCCTTG   | miR-103a-2-5p |
| ACTGATTTCTTTTGGTGTTTCCAG | miR-29a-5p    |
| TTCTGCCTCTGTCCAGGTCCTT   | miR-5001-3p   |
| AGTTCTTTCAGTGGCAAGCTTTA  | miR-22-5p     |
| TGACCGATTTCTCCTGGTGTTT   | miR-29c-5p    |
| ACTGGACTTGGAGTCAGAAA     | miR-378d      |
| AGCTTCCATGACTCCTGATGGA   | miR-2115-5p   |
| TTCAACGGGTATTTATTGAGCA   | miR-95        |
| TTTGTTCGTTCCGGCTCGCGTGA  | miR-375       |
| TGGGGAGCTGAGGCTCTGGGGGTG | miR-939-5p    |
| TCAGGTGTGGAAACTGAGGCAG   | miR-3934-5p   |
| TGATCAGGCAAAATGCAGACT    | miR-4772-5p   |
| TTTTGCGATGTGTTCCTAATAT   | miR-450a-5p   |
| CCAGTGGGGCTGCTGTTATCTG   | miR-194-3p    |
| TTTAGAGACGGGGTCTTGCTCT   | miR-1303      |
| TGATTGGTACGTCTGTGGGTAG   | miR-509-3p    |
| TGTGAGGTTGGCATTGTTGTCT   | miR-1294      |
| TGGCAGTGTCTTAGCTGGTTGT   | miR-34a-5p    |
| TCATCCTCGTCTCCCTCCCAG    | miR-5196-3p   |
| GTGAGTCTCTAAGAAAAGAGGA   | miR-627       |
| TGTCACTCGGCTCGGCCACTAC   | miR-668       |
| ACTGGACTTGGAGTCAGGA      | miR-378e      |
| GGGGCTGGGCGCGCGCC        | miR-4492      |
| TCCTTCTGCTCCGTCCCCCAG    | miR-1237-3p   |
| CCAGTCCTGTGCCTGCCGCCT    | miR-1910      |
| TGAGGATGGATAGCAAGGAAGCC  | miR-3605-5p   |
| AGCTGGTGTGTGAATCAGGCCG   | miR-138-5p    |
| TATGTCTGCTGACCATCACCTT   | miR-654-3p    |
| GGTGCAGTGTGCATCTCTGGT    | miR-143-5p    |
| CTGGTACAGGCCCTGGGGACAG   | miR-150-3p    |
| GCGACCCACTCTTGGTTTCCA    | miR-551a      |
| ACCGTGGCTTTCGATTGTTACT   | miR-132-5p    |
| CGGCCCGGGCTGCTGCTGTTCCCT | miR-1538      |
| ACTCAAAACCCCTTCAGTGACTT  | miR-616-5p    |
| AAGGAGCTTACAACTAGCTGGG   | miR-708-5p    |
| TCCTCTTCTCCCTCCTCCCAG    | miR-877-3p    |
| ATATACAGGGGGAGACTCTTAT   | miR-1185-1-3p |
| TAGCAGCACAGAAATATTGGC    | miR-195-5p    |
| GTTCTCCCAACGTAAGCCCAGC   | miR-629-3p    |
| AAAGACATAGGATAGAGTCACCTC | miR-641       |
| TACCCTGTAGAACCGAATTTGTG  | miR-10b-5p    |
| ACTGGACTAGGAGTCAGAAGG    | miR-378i      |
| CAGCCCTCCTCCCGCACCCAAA   | miR-4687-5p   |
| ACCTTCTCTCCATGGGTCTTT    | miR-3667-3p   |

|                          |              |
|--------------------------|--------------|
| GAAGAACTGTTGCATTTGCCCT   | miR-4511     |
| AGAGTCGGCGACGCCGCCAGC    | miR-4785     |
| AGCTCTAGAAAGATTGTTGACC   | miR-6502-5p  |
| GCAGGAACCTGTGAGTCTCCT    | miR-873-5p   |
| TGGCCCTGACTGAAGACCAGCAGT | miR-1291     |
| TGAGACGCGCCCTGTTGGAGT    | miR-139-3p   |
| AGGGGCTGGCTTTCCTCTGGTC   | miR-185-3p   |
| AGGCAGTGTAGTTAGCTGATTGC  | miR-34c-5p   |
| AGCCTGGAAGCTGGAGCCTGCAGT | miR-1254     |
| AACTAGCTCTGTGGATCCTGAC   | miR-4661-5p  |
| TCTTTGGTTATCTAGCTGTATGA  | miR-9-5p     |
| AAAAACTGAGACTACTTTTGCA   | miR-548e     |
| TAATTTTATGTATAAGCTAGT    | miR-590-3p   |
| AACTGGCCTACAAAGTCCCAGT   | miR-193a-3p  |
| CTGGGCCCCGCGGGCGTGGGG    | miR-6724-5p  |
| TTTGGGATTGACGCCACATGTCT  | miR-6513-5p  |
| ATTGTCCCTCTCCCTTCCCAG    | miR-4646-3p  |
| CACAGCAAGTGTAGACAGGCA    | miR-3120-3p  |
| TCAAGAGCAATAACGAAAAATGT  | miR-335-5p   |
| TGGTAGACTATGGAACGTAGG    | miR-379-5p   |
| TAGGTTATCCGTGTTGCCTTCG   | miR-154-5p   |
| CAACAAATCACAGTCTGCCATA   | miR-7-1-3p   |
| CTATACGGCCTCCTAGCTTTCC   | let-7e-3p    |
| AGGAGGAATTGGTGCTGGTCTT   | miR-766-5p   |
| AGGGGGCGGGCTCCGGCG       | miR-4488     |
| TAGATAAAATATTGGTACCTG    | miR-577      |
| GGCCAGCCACCAGGAGGGCTG    | miR-3194-5p  |
| AAAAGTATTTGCGGGTTTTGTC   | miR-5481     |
| TGCCTAGGCTGAGACTGCAGTG   | miR-3135a    |
| CTGTTGCCACTAACCTCAACCT   | miR-744-3p   |
| CTATACAATCTACTGTCTTTC    | let-7a-3p    |
| TCAGCACCAGGATATTGTTGGAG  | miR-3065-3p  |
| CTGACTGTTGCCGTCCCTCCAG   | miR-943      |
| AGGGGGATGGCAGAGCAAAATT   | miR-5010-5p  |
| CCAATATTACTGTGCTGCTTTA   | miR-16-2-3p  |
| ATCAGGGCTTGTGGAATGGGAAG  | miR-3127-5p  |
| ATCCCACCTCTGCCACCA       | miR-1260a    |
| TGAGCTAAATGTGTGCTGGGA    | miR-610      |
| AACCATCGACCGTTGAGTGGAC   | miR-181c-3p  |
| GGAGAAATTATCCTTGGTGTGT   | miR-539-5p   |
| CATCATCGTCTCAAATGAGTCT   | miR-136-3p   |
| ATTGTCCTTGCTGTTTGGAGAT   | miR-2355-3p  |
| TGACCTGGGACTCGGACAGCTG   | miR-3661     |
| GCAGCCCAGCTGAGGCCTCTG    | miR-4690-3p  |
| CCAACCTAGGTGGTCAGAGTTG   | miR-4714-3p  |
| AATCATAAGGGACATCCAGTT    | miR-487a     |
| TTAGCCAATTGTCCATCTTTAG   | miR-4662a-5p |
| TGCCGCCCTCTCGCTGCTCTAG   | miR-4632-3p  |
| CGCCCCCTCCTGCCCCACAG     | miR-4749-3p  |
| ACCTTGGCTCTAGACTGCTTACT  | miR-212-5p   |
| TACGCGCAGACCACAGGATGTC   | miR-3939     |
| AAAAGTTATTGCGGTTTTGGCT   | miR-548at-5p |
| AGGGACGGGACGCGGTGCAGTG   | miR-92b-5p   |
| AGACAGTAGTTCTTGCCTGGTT   | miR-4645-3p  |
| ACCTCCTGTGTGCATGGATTA    | miR-660-3p   |
| TAGGATTACAAGTGTGCGCCAC   | miR-3159     |
| TTCAGCCAGGCTAGTGCAGTCT   | miR-3157-5p  |
| TGGGCAGGGGCTTATTGTAGGAG  | miR-6721-5p  |
| CAGCCCGGATCCCAGCCACTT    | miR-3940-3p  |

|                          |              |
|--------------------------|--------------|
| GGGCTCACATCACCCCAT       | miR-4284     |
| TGTCGTGGGGCTTGCTGGCTTG   | miR-4440     |
| CATCCGTCCGTCTGTCCAC      | miR-4800-3p  |
| TTTCCCTTTCCATCCTGGCAG    | miR-5006-3p  |
| AGTGCCCTGAGGGAGTAAGAGCCC | miR-550a-5p  |
| AAAAGTAATTGTGGTTTTTGC    | miR-548ay-5p |
| TTGGAGGCGTGGGTTTT        | miR-4443     |
| CAGTTATCACAGTGCTGATGCT   | miR-101-5p   |
| CCAGGCTCTGCAGTGGGA       | miR-3155b    |
| AAACAAACATGGTGCACCTTCTT  | miR-495-3p   |
| ATGGCATCGTCCCCTGGTGGCT   | miR-4642     |
| TCAGTTCAGGCCAACAGGCT     | miR-584-3p   |
| AAAAGTAATTGCGGTTTTTGC    | miR-548au-5p |
| GGGTGCGGGCCGGCGGGG       | miR-4466     |
| TTACACAGCTGGACAGAGGCA    | miR-4672     |
| CTGCCAATTCCATAGGTCACAG   | miR-192-3p   |
| AAGTGCCCCCACAGTTTGAGTGC  | miR-371b-3p  |
| AGGTTACCCGAGCAACTTTGCAT  | miR-409-5p   |
| TTAATTTTTTGTTCGGTCACT    | miR-4775     |
| TACCCAGTCTCCGGTGCAGCC    | miR-3130-5p  |
| GCTAAGGAAGTCTGTGCTCAG    | miR-4521     |
| TAACGCATAATATGGACATGT    | miR-3912     |
| CTTAGCAGGTTGTATTATCATT   | miR-374b-3p  |
| CCAGAGCAGCTGCGGTAACAGT   | miR-6501-3p  |
| CGGGTAGAGAGGGCAGTGGGAGG  | miR-197-5p   |
| TCTATACAGACCCCTGGCTTTTC  | miR-1284     |
| AGAGCTGGCTGAAGGGCAG      | miR-4487     |
| TCGGCCTGACCACCCACCCAC    | miR-1234-3p  |
| TGTGACAGATTGATAACTGAAA   | miR-542-3p   |
| TAAGGTGCATCTAGTGCAGTTAG  | miR-18b-5p   |
| TGAGTATTACATGGCCAATCTC   | miR-496      |
| GAGCCAGTGGTGAGACAGTGA    | miR-4676-5p  |
| TTTCTTCTTAGACATGGCAACG   | miR-4659a-3p |
| AGACCCTGGTCTGCACTCTATC   | miR-504      |
| ACGGTGCTGGATGTGGCCTTT    | miR-1250     |
| TCGTGTCTTGTGTGCAGCCGG    | miR-187-3p   |
| TGAGGCGGGGGGCGGAGC       | miR-6087     |
| TGAGGCTCTGTTAGCCTTGGCTC  | miR-2467-5p  |
| GATATCAGCTCAGTAGGCACCG   | miR-3074-3p  |
| CCAGTTACCGCTTCCGCTACCGC  | miR-935      |
| TTTGGGACTGATCTTGATGTCT   | miR-3913-5p  |
| CTCGGGCGGAGGTGGTTGAGTG   | miR-4750-5p  |
| CCTCCCATGCCAAGAACTCCC    | miR-2116-3p  |
| TAGGGGCAGCAGAGGACCTGGG   | miR-4688     |
| CCAGGCTCTGCAGTGGGAACT    | miR-3155a    |
| TATAAAATGAGGGCAGTAAGAC   | miR-3163     |
| TGAGGATATGGCAGGGAAGGGGA  | miR-3679-5p  |
| TGGACGGAGAAGTATAAGGGT    | miR-184      |
| AAAGCTGGGTTGAGAAGG       | miR-320e     |
| CTTCCTCGTCTGTCTGCCCC     | miR-1238-3p  |
| TCTGGCTCCGTGTCTTCACTCCC  | miR-149-5p   |
| AGGATGAGCAAAGAAAGTAGATT  | miR-1255a    |
| ATAGGACTCATATAGTGCCAG    | miR-3117-3p  |
| TAGGTAGTTTTCATGTTGTTGGG  | miR-196a-5p  |
| CACGTGGGTACATGCT         | miR-4318     |
| TTTGAGGCTACAGTGAGATGTG   | miR-1304-5p  |
| CTAGGTATGGTCCCAGGGATCC   | miR-331-5p   |
| AGGGACTTTCAGGGGCAGCTGT   | miR-365b-5p  |
| AGGAGATCCTGGGTT          | miR-3676-5p  |

|                         |             |
|-------------------------|-------------|
| TCAACAAAATCACTGATGCTGGA | miR-3065-5p |
| TCTCTTCATCTACCCCCAG     | miR-6515-3p |
| TAGTGAGTTAGAGATGCAGAGCC | miR-3174    |
| CTCGTGGGCTCTGGCCACGGCC  | miR-3677-3p |
| CAAGCTCGCTTCTATGGGTCTG  | miR-99a-3p  |
| TTATTGTCACGTCTGATT      | miR-5701    |
| ATCCGCGCTCTGACTCTCTGCC  | miR-937-3p  |
| CGTCCCACCCCCACTCCTGT    | miR-4433-5p |
| CCCCGGGAGCCCGGCG        | miR-4532    |
| TTTCTATTTCTCAGTGGGGCTC  | miR-4482-3p |
| TAAAGAGCCCTGTGGAGACA    | miR-1276    |
| TACTTTTCTAGGTTGTTGGGG   | miR-5003-3p |

|                        |            |
|------------------------|------------|
| TCCTGTACTGAGCTGCCCCGAG | miR-486-5p |
|------------------------|------------|

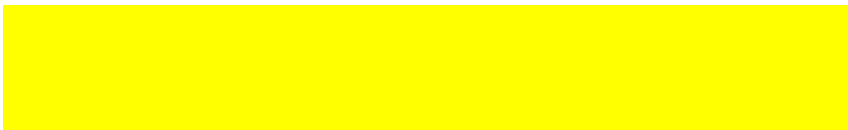

|                             |         |                   |
|-----------------------------|---------|-------------------|
| min of sums of selected 95: | 21319   | sample size limit |
| ave of sums of selected 95: | 1469347 | sum =             |
| sd of sums of selected 95:  | 1235774 | 529 miRs          |
|                             |         | XX samples        |

counts shown are exact matches + inclusions

each miR ranked by total reads

|                         |             |
|-------------------------|-------------|
| 530 mature miRNAs:      | ID          |
| TATTGCACTTGTCCCGGCCTGT  | miR-92a-3p  |
| CAACGGAATCCCAAAAGCAGCTG | miR-191-5p  |
| TCTCCCAACCCTTGTACCAGTG  | miR-150-5p  |
| TGAGGTAGTAGGTTGTATAGTT  | let-7a-5p   |
| AACATTCAACGCTGTCGGTGAGT | miR-181a-5p |
| TAGCAGCACGTAAATATTGGCG  | miR-16-5p   |
| TTCAAGTAATCCAGGATAGGCT  | miR-26a-5p  |
| AAACCGTTACCATTACTGAGTT  | miR-451a    |
| AAGCTGCCAGTTGAAGAACTGT  | miR-22-3p   |
| CATTGCACTTGTCTCGGTCTGA  | miR-25-3p   |
| TGAGGTAGTAGTTTGTGCTGTT  | let-7i-5p   |
| TGTAAACATCCCCGACTGGAAG  | miR-30d-5p  |
| TGAGGTAGTAGTTTGTACAGTT  | let-7g-5p   |
| TGAGGTAGTAGTTTGTGTGGTT  | let-7b-5p   |
| TGAGGTAGTAGATTGTATAGTT  | let-7f-5p   |
| AGCTCGGTCTGAGGCCCTCAGT  | miR-423-3p  |
| TTCAAGTAATTCAGGATAGGT   | miR-26b-5p  |
| AGCAGCATTGTACAGGGCTATGA | miR-103a-3p |
| CAAAGAATTCTCCTTTTGGGCT  | miR-186-5p  |

|                          |             |
|--------------------------|-------------|
| CACTAGATTGTGAGCTCCTGGA   | miR-28-3p   |
| ACTGGACTTGGAGTCAGAAGG    | miR-378a-3p |
| CAAAGTGCTGTTTCGTGCAGGTAG | miR-93-5p   |
| TCAGTGCACACTACAGAACTTTGT | miR-148a-3p |
| TGTCAGTTTGTCAAATACCCCA   | miR-223-3p  |
| TGAGAACTGAATTCATAGGCT    | miR-146b-5p |
| TACCACAGGGTAGAACCACGG    | miR-140-3p  |
| AAAAGCTGGGTTGAGAGGGCGA   | miR-320a    |
| TTTGGCAATGGTAGAACTCACACT | miR-182-5p  |
| TCGAGGAGCTCACAGTCT       | miR-151b    |
| TCAGTGCATCACAGAACTTTGT   | miR-148b-3p |
| TGTAAACATCCTACACTCTCAGC  | miR-30c-5p  |
| AGAGGTAGTAGGTTGCATAGTT   | let-7d-5p   |
| TGTAAACATCCTTACTGGAAG    | miR-30e-5p  |
| TAGCTTATCAGACTGATGTTGA   | miR-21-5p   |
| TCGAGGAGCTCACAGTCTAGT    | miR-151a-5p |
| TAGCAGCACATCATGGTTTACA   | miR-15b-5p  |
| CTAGACTGAAGCTCCTTGAGG    | miR-151a-3p |
| TGAGAACTGAATTCATGGGTT    | miR-146a-5p |
| CACCCGGCTGTGTGCACATGTGC  | miR-941     |
| TGAGGGGCAGAGAGCGAGACTTT  | miR-423-5p  |
| TTACCACCTTCTCCACCCAGC    | miR-197-3p  |
| AACATTCATTGCTGTCGGTGGGT  | miR-181b-5p |
| TCAGGCTCAGTCCCCTCCCGAT   | miR-484     |
| CTGACCTATGAATTGACAGCC    | miR-192-5p  |
| TCTCACACAGAAATCGCACCCGT  | miR-342-3p  |
| AGCTACATCTGGCTACTGGGT    | miR-222-3p  |
| TTACAGTGGCTAAGTTCTGC     | miR-27b-3p  |
| TCTCTCGGCTCCTCGGGCTC     | miR-3615    |
| GGATATCATCATATACTGTAAG   | miR-144-5p  |
| TGAGATGAAGCACTGTAGCTC    | miR-143-3p  |
| TCGGATCCGTCTGAGCTTGGCT   | miR-127-3p  |
| ATCACATTGCCAGGGATTTCC    | miR-23a-3p  |
| AATGGCGCCACTAGGGTTGTG    | miR-652-3p  |
| CTTTCAGTCGGATGTTTACAGC   | miR-30e-3p  |
| CAACACCAGTCGATGGGCTGT    | miR-21-3p   |
| TACAGTACTGTGATAACTGAA    | miR-101-3p  |
| AATGACACGATCACTCCCGTTGA  | miR-425-5p  |
| AACATTCAACCTGTCGGTGAGT   | miR-181c-5p |
| TTAATGCTAATCGTGATAGGGGT  | miR-155-5p  |
| TCCCTGAGACCCTTTAACTGTGA  | miR-125a-5p |
| AGCTACATTGTCTGCTGGGTTTC  | miR-221-3p  |
| TGAGACCTCTGGGTTCTGAGCT   | miR-769-5p  |
| CATTATTACTTTTGGTACGCG    | miR-126-5p  |
| CATAAAGTAGAAAGCACTACT    | miR-142-5p  |
| GCCCTGACCTGTCTGTTCTG     | miR-4732-3p |
| CAAAGTGCTTACAGTGCAGGTAG  | miR-17-5p   |
| TGTAAACATCCTACACTCAGCT   | miR-30b-5p  |
| TAAAGTGCTTATAGTGCAGGTAG  | miR-20a-5p  |
| TGGCTCAGTTCAGCAGGAACAG   | miR-24-3p   |
| TATGGCACTGGTAGAATTCACT   | miR-183-5p  |
| CTATACGACCTGCTGCCTTTCT   | let-7d-3p   |
| CGGGGCAGCTCAGTACAGGAT    | miR-486-3p  |
| TGAGGTAGTAAGTTGTATTGTT   | miR-98-5p   |
| CATGCCCTTGAGTGTAGGACCGT  | miR-532-5p  |
| TAGCACCATCTGAAATCGGTTA   | miR-29a-3p  |
| GAAATGTTGCTCGGTGAACCCCT  | miR-409-3p  |
| ATGCACCTGGGCAAGGATTCTG   | miR-500a-3p |
| CACCCGTAGAACCACCTTGCG    | miR-99b-5p  |

TGCGGGGCTAGGGCTAACAGCA  
ATCACATTGCCAGGGATTACC  
AATTGCACGGTATCCATCTGTA  
ACTCGGCGTGGCGTCCGGTCGTG  
TATTGCACTCGTCCCGGCCTCC  
TTATAAAGCAATGAGACTGATT  
TTCACAGTGGCTAAGTTCCGC  
CCTCTGGGCCCTTCCCTCCAG  
CTGGCCCTCTCTGCCCTTCCGT  
TCGTACCGTGAGTAATAATGCG  
TCACAGTGAACCGGTCTCTTT  
TGAGGTAGGAGGTTGTATAGTT  
ACCACTGACCGTTGACTGTACC  
TACAGTATAGATGATGTACT  
GCTGACTCCTAGTCCAGGGCTC  
CAGTGCAATGTTAAAAGGGCAT  
TAGCAGCACATAATGGTTTGTG  
AAGGAGCTCACAGTCTATTGAG  
TCGGTTCTCAGGGCTCCACC  
CCGCACTGTGGTACTTGCTGC  
TGCCCTGTGGACTCAGTTCTGG  
TAGTGCAATATTGCTTATAGGGT  
GCCCCTGGGCCTATCCTAGAA  
CAGTGCAATGATGAAAGGGCAT  
AGGGGTGCTATCTGTGATTGA  
TACCCTGTAGATCCGAATTTGTG  
TGTAACAGCAACTCCATGTGGA  
TACCATTGCATATCGGAGTTG  
ACCCCACTCCTGGTACC  
TTATCAGAATCTCCAGGGTAC  
TAAAGTGCTGACAGTGCAGAT  
TGGAGAGAAAGGCAGTTCCTGA  
ACCATCGACCGTTGATTGTACC  
TCCCCAGGTGTGATTCTGATTT  
GTCCAGTTTTCCAGGAATCCCT  
CAAAGTGCTCATAGTGCAGGTAG  
AGGCAAGATGCTGGCATTAGCT  
TGAGGTAGTAGGTTGTATGGTT  
TGTAACATCCTCGACTGGAAG  
ACAGTAGTCTGCACATTGGTTA  
ACAGTAGTCTGCACATTGGTTA  
TATTCATTTATCCCAGCCTACA  
ACTGCCCCAGGTGCTGCTGG  
TAACAGTCTACAGCCATGGTCCG  
AATATAACACAGATGGCCTGT  
AAAGTTCTGAGACACTCCGACT  
TGTAGTGTTCCTACTTTATGGA  
ACTCTTTCCCTGTTGCACTAC  
CTGCCCTGGCCCCGAGGGACCGA  
TGAGCGCCTCGACGACAGAGCCG  
ACTCCAGCCCCACAGCCTCAGC  
TGGGTCTTTGCGGGCGAGATGA  
AATGCACCCGGGCAAGGATTCT  
CCTGTTCTCCATTACTTGCTC  
CCCAGTGTTCAGACTACCTGTTT  
CACGCTCATGCACACACCACA  
TCGACCGGACCTCGACCGCT  
AACATTCATTGTTGTCGGTGGGT  
TGGGTTTACGTTGGGAGAACT

miR-744-5p  
miR-23b-3p  
miR-363-3p  
miR-1307-3p  
miR-92b-3p  
miR-340-5p  
miR-27a-3p  
miR-326  
miR-328  
miR-126-3p  
miR-128  
let-7e-5p  
miR-181a-2-3p  
miR-144-3p  
miR-345-5p  
miR-130a-3p  
miR-15a-5p  
miR-28-5p  
miR-671-3p  
miR-106b-3p  
miR-146b-3p  
miR-454-3p  
miR-331-3p  
miR-130b-3p  
miR-342-5p  
miR-10a-5p  
miR-194-5p  
miR-660-5p  
miR-4286  
miR-361-5p  
miR-106b-5p  
miR-185-5p  
miR-181a-3p  
miR-361-3p  
miR-145-5p  
miR-20b-5p  
miR-31-5p  
let-7c  
miR-30a-5p  
miR-199a-3p  
miR-199b-3p  
miR-664a-3p  
miR-324-3p  
miR-132-3p  
miR-410  
miR-148a-5p  
miR-142-3p  
miR-130b-5p  
miR-874  
miR-339-3p  
miR-766-3p  
miR-193a-5p  
miR-501-3p  
miR-26b-3p  
miR-199a-5p  
miR-574-3p  
miR-1307-5p  
miR-181d  
miR-629-5p



|                         |              |
|-------------------------|--------------|
| CTGTGCGTGTGACAGCGGCTGA  | miR-210      |
| AAGTTCTGTTATACACTCAGGC  | miR-148b-5p  |
| ATCGGGAATGTCGTGTCCGCC   | miR-425-3p   |
| TGAGAACCACGTCTGCTCTGAG  | miR-589-5p   |
| ACTGCTGAGCTAGCACTTCCCG  | miR-93-3p    |
| GTAGAGGAGATGGCGCAGGG    | miR-877-5p   |
| TCCGTCTCAGTTACTTTATAGC  | miR-340-3p   |
| TGTGCAAATCCATGCAAACTGA  | miR-19b-3p   |
| TTTCCGGCTCGCGTGGGTGTGT  | miR-1180     |
| CAAAACGTGAGGCGCTGCTAT   | miR-424-3p   |
| ATCAACAGACATTAATTGGGCGC | miR-421      |
| TCTTCTCTGTTTTGGCCATGTG  | miR-942      |
| CCTCCCACACCCAAGGCTTGCA  | miR-532-3p   |
| CGTGTATTTGACAAGCTGAGTT  | miR-223-5p   |
| AAAAGTGCTTACAGTGCAGGTAG | miR-106a-5p  |
| TATACAAGGGCAAGCTCTCTGT  | miR-381-3p   |
| TGTCCTCTAGGGCCTGCAGTCT  | miR-3909     |
| ACTGTAAACGCTTCTGATG     | miR-3607-3p  |
| TTTTGTGTCTCCATTCCCCAG   | miR-5010-3p  |
| AATCCTTGAACCTAGGTGTGAGT | miR-362-5p   |
| TCTACAGTGCACGTGTCTCCAGT | miR-139-5p   |
| TCCCTGTCTCCAGGAGCTCACG  | miR-339-5p   |
| GGCGGGTGCAGGGGTGG       | miR-3656     |
| CAGTGCAATAGTATTGTCAAAGC | miR-301a-3p  |
| CGTCAACACTTGCTGGTTTCCT  | miR-505-3p   |
| TTGGGGAACGGCCGCTGAGTG   | miR-2110     |
| CAGTGGTTTTACCTATGGTAG   | miR-140-5p   |
| TCCAGCATCAGTGATTTTGTG   | miR-338-3p   |
| CCTCCTGCCCTCCTTGCTGT    | miR-1976     |
| TAACTACTGCCGGTAATGATGGA | miR-200c-3p  |
| AATGGATTTTTGGAGCAGG     | miR-1246     |
| TAGCACCATTTGAAATCGGTTA  | miR-29c-3p   |
| CACCTTGCGCTACTCAGGTCTG  | miR-3200-3p  |
| AAACTCTACTTGTCCTTCTGAGT | miR-618      |
| TAGGTAGTTTTCTGTTGTTGGG  | miR-196b-5p  |
| CTCCGTTTGCCTGTTTCGCTG   | miR-1468     |
| TCTAGTAAGAGTGGCAGTCGA   | miR-628-3p   |
| CCCAGTGTTTAGACTATCTGTTT | miR-199b-5p  |
| ACGCCCTTCCCCCCTTCTTCA   | miR-1249     |
| TGTGACTGGTTGACCAGAGGGG  | miR-134      |
| TCAGTGCATGACAGAACTTGG   | miR-152      |
| CTCCTGACTCCAGTCTCTGTGT  | miR-378a-5p  |
| GTCATACACGGCTCTCCTCTCT  | miR-485-3p   |
| TGTTCTCTGTCTCCAGAC      | miR-4326     |
| AAAAGTACTTGCGGATTT      | miR-548av-5p |
| TCTTGGAGTAGGTCATTGGGTGG | miR-432-5p   |
| ATTCTAATTTCTCCACGTCTTT  | miR-576-5p   |
| CAGGGCTGGCAGTGACATGGGT  | miR-4446-3p  |
| AGGCGGAGACTTGGGCAATTG   | miR-25-5p    |
| AAAAGTACTTGCGGATTTTGCT  | miR-548k     |
| TTGTACATGGTAGGCTTTCATT  | miR-493-5p   |
| AGGGGAAAGTTCTATAGTCC    | miR-625-5p   |
| ACCTGGCATACAATGTAGATTT  | miR-221-5p   |
| GAGTCTACAGTCAGAC        | miR-3168     |
| ATATAATACAACCTGCTAAGTG  | miR-374b-5p  |
| AGCAGCATTGTACAGGGCTATCA | miR-107      |
| CCTCCGTGTTACCTGTCTCTAG  | miR-3605-3p  |
| TTATGGTTTGCCTGGGACTGAG  | miR-584-5p   |
| TCCCTGAGACCTAACTTGTGA   | miR-125b-5p  |

|                          |               |
|--------------------------|---------------|
| TAAGTGGTTGAACAACCTGAACC  | miR-582-3p    |
| AAGGGCTTCCCTCTCTGCAGGAC  | miR-3158-3p   |
| CGCATCCCCTAGGGCATTGGTGT  | miR-324-5p    |
| ACTGGCCTGGGACTACCGG      | miR-3176      |
| GGGTTTCCCTGGGGATGGGATTT  | miR-23a-5p    |
| CAAGTCACTAGTGGTTCCGTT    | miR-224-5p    |
| TGAGTGTGTGTGTGTGAGTGTGT  | miR-574-5p    |
| TGAGGAGATCGTCGAGGTTGG    | miR-3150b-3p  |
| TAAGGTGCATCTAGTGCAGATAG  | miR-18a-5p    |
| GCCTGCTGGGGTGGAACTGGT    | miR-370       |
| AGTGCCTGAGGGAGTAAGAG     | miR-550a-3-5p |
| TCAGAACAATGCCGGTCCCAGA   | miR-589-3p    |
| TTTGGTCCCCTTCAACCAGCTG   | miR-133a      |
| TGTAGAGCAGGGAGCAGGAAGCT  | miR-4732-5p   |
| CAGCCCCACAGCCTCAGA       | miR-4323      |
| ACTCAAAGATGGCGGCACTTT    | miR-371b-5p   |
| TAGTAGACCGTATAGCGTACG    | miR-411-5p    |
| CCTCACCATCCCTTCTGCCTGC   | miR-6511a-3p  |
| TCTGGGCAACAAAGTGAGACCT   | miR-1285-3p   |
| CTGGGAGAGGGTTGTTTACTCC   | miR-30c-1-3p  |
| TCTCTGGGCCTGTGTCTTAGGC   | miR-330-5p    |
| AGGGCTTAGCTGCTTGTGAGCA   | miR-27a-5p    |
| TGATATGTTTGATATATTAGGT   | miR-190a      |
| TCAGCTACTACCTCTATTAGG    | miR-5690      |
| AACCCGTAGATCCGAACTTGTG   | miR-100-5p    |
| ACTGCCCTAAGTGCTCCTTCTGG  | miR-18a-3p    |
| CTGTACAGGCCACTGCCTTGC    | let-7g-3p     |
| AATCCTTTGTCCCTGGGTGAGA   | miR-501-5p    |
| TGTCTTGCAGGCCGTCATGCA    | miR-431-5p    |
| AGGTTGGGATCGGTTGCAATGCT  | miR-92a-1-5p  |
| AAAAGCTGGGTTGAGAGGGCAA   | miR-320b      |
| GGGAGAAGGGTCGGGGC        | miR-4516      |
| TTGCAGCTGCCTGGGAGTACTTC  | miR-1301      |
| AATCCTTGCTACCTGGGT       | miR-500b      |
| TTTTTTCATTATTGCTCCTGACC  | miR-335-3p    |
| CCGGTCCCAGGAGAACCTGCAGA  | miR-4746-5p   |
| TTATAATACAACCTGATAAGTG   | miR-374a-5p   |
| TTAGGGCCCTGGCTCCATCTCC   | miR-1296      |
| ACTGCAGTGAAGGCACTTGTAG   | miR-17-3p     |
| AGGGCCCCCCTCAATCCTGT     | miR-296-5p    |
| AACTGGCCCTCAAAGTCCCGCT   | miR-193b-3p   |
| TTACAGTTGTTCAACCAGTTACT  | miR-582-5p    |
| TGCCTACTGAGCTGAAACACAG   | miR-24-2-5p   |
| TGTCTTACTCCCTCAGGCACAT   | miR-550a-3p   |
| GAAGTTGTTTCGTGGTGGATTGCG | miR-382-5p    |
| CTGCGCAAGCTACTGCCTTGCT   | let-7i-3p     |
| CGAATCATTATTTGCTGCTCTA   | miR-15b-3p    |
| TAATGCCCCCTAAAAATCCTTAT  | miR-365a-3p   |
| TAATGCCCCCTAAAAATCCTTAT  | miR-365b-3p   |
| ATCATGATGGGCTCCTCGGTGT   | miR-433       |
| CGTGCCACCCTTTTCCCCAG     | miR-1227-3p   |
| AATGCACCTGGGCAAGGATTCA   | miR-502-3p    |
| AATCGTACAGGGTCATCCACTT   | miR-487b      |
| TAATACTGCCTGGTAATGATGA   | miR-200b-3p   |
| TCGGGGATCATCATGTCACGAGA  | miR-542-5p    |
| TGATATGTTTGATATTGGGTT    | miR-190b      |
| AATCTGAGAAGGGCACAAGGT    | miR-3200-5p   |
| CGGGCGTGGTGGTGGGGG       | miR-1268a     |
| CATCAGAATTCATGGAGGCTAG   | miR-2115-3p   |

ACCTGGACCCAGCGTAGACAAAG  
GACTATAGAACTTTCCCCTCA  
TAATCCTTGCTACCTGGGTGAGA  
TGTGCAAATCTATGCAAACTGA  
CTGGTTTACATGGTGGCTTAG  
AAAAGCTGCAGTTACTTTTGC  
AAAAGCTGGGTTGAGAGGA  
TGTGCTTGCTCGTCCCGCCCGCA  
CCAAAAGCTGCAGTTACTTTTGC  
CAAGCTCGTGTCTGTGGGTCCG  
CGGCGGGGACGGCGATTGGTC  
CATCCCTTGCATGGTGGAGGG  
ACGTTGGCTCTGGTGGTG  
CTTATCAGATTGTATTGTAATT  
GTGGGGGAGAGGCTGTC  
CCTCACCACCCCTTCTGCCTGCA  
GCGGGGCTGGGCGCGCG  
AAACATTTCGCGGTGCACTTCTT  
AGGACCTTCCCTGAACCAAGGA  
TGGAAGACTAGTGATTTTGTGT  
TTCATTTGCCTCCAGCCTACA  
AAAAGTAATTGCGGTCTTT  
TCTCACTGTAGCCTCGAACCC  
AAAAGCTGGGTTGAGAGGGT  
CCTGCAACTTTGCCTGATCAGA  
TCACCAGCCCTGTGTCCCTAG  
AGAGGTTGCCCTTGGTGAATTC  
TGCTGGATCAGTGGTTCGAGTC  
TGAAGGTCTACTGTGTGCCAGG  
AGTTGCCAGGGCTGCCTTTGGT  
ATCCCACCACTGCCACCAT  
TGCACGGCACTGGGGACACGT  
AAAAGTAATTGCGGTCTTTGGT  
CACATTACACGGTCGACCTCT  
TTTGGCACTAGCACATTTTGGCT  
ATGCTGACATATTTACTAGAGG  
AACCCGTAGATCCGATCTTGTG  
CCACCTCCCCTGCAAACGTCCA  
TACGTCATCGTTGTCATCGTCA  
CTAAGAAGTTGACTGAAG  
TGGTGGGCCGAGAACATGTGC  
ACCCTATCAATATTGTCTCTGC  
ATGGCCAGAGCTCACACAGAGG  
AGGAAGCCCTGGAGGGGCTGGAG  
AAGGCAGGGCCCCGCTCCCC  
TGAAACATACACGGGAAACCTC  
AGAGGCTGGCCGTGATGAATTC  
CTGGGAGGTGGATGTTTACTTC  
GGAGGAACCTTGGAGCTTCGGC  
GTGAGGACTCGGGAGGTGG  
AGAGCTTAGCTGATTGGTGAAC  
GGGAGCCAGGAAGTATTGATGT  
GTCCCTCTCCAAATGTGTCTTG  
CGGCTCTGGGTCTGTGGGGA  
AGTGGGGAACCCCTCCATGAGG  
CAGCAGCACACTGTGGTTTGT  
AGAGTTGAGTCTGGACGTCCCG  
TCTGTGAGACCAAAGAATACT  
CAGTGCAATGATATTGTCAAAGC

miR-3690  
miR-625-3p  
miR-500a-5p  
miR-19a-3p  
miR-29b-2-5p  
miR-548av-3p  
miR-320d  
miR-636  
miR-548o-3p  
miR-99b-3p  
miR-1908  
miR-188-5p  
miR-1306-3p  
miR-374a-3p  
miR-1275  
miR-6511b-3p  
miR-4508  
miR-543  
miR-659-5p  
miR-7-5p  
miR-664b-3p  
miR-548ap-5p  
miR-1304-3p  
miR-320c  
miR-4772-3p  
miR-1226-3p  
miR-377-5p  
miR-1287  
miR-493-3p  
miR-6501-5p  
miR-1260b  
miR-3177-3p  
miR-548j  
miR-323a-3p  
miR-96-5p  
miR-628-5p  
miR-99a-5p  
miR-1306-5p  
miR-598  
miR-3653  
miR-654-5p  
miR-454-5p  
miR-4435  
miR-671-5p  
miR-940  
miR-494  
miR-485-5p  
miR-30b-3p  
miR-3928  
miR-1224-5p  
miR-27b-5p  
miR-505-5p  
miR-642a-5p  
miR-760  
miR-491-5p  
miR-497-5p  
miR-219-1-3p  
miR-4677-3p  
miR-301b

|                            |               |
|----------------------------|---------------|
| TATGGAAAGACTTTGCCACTCT     | miR-3688-3p   |
| TCAAGTGTCACTGTCCCTAG       | miR-6513-3p   |
| TCTCCCTTCCCTGCCCTGGCTAG    | miR-4685-3p   |
| TAGTGGTCAGAGGGCTTATGA      | miR-6718-5p   |
| CTGGGATCTCCGGGGTCTTGGTT    | miR-769-3p    |
| AGTCTGCATTCAAATCCCCAGA     | miR-6503-5p   |
| AGCGCGGGCTGAGCGCTGCCAGTC   | miR-2277-5p   |
| CTTTCAGTCAGATGTTTGCTGC     | miR-30d-3p    |
| ACTGGGCTTGGAGTCAGAAG       | miR-378g      |
| CAGGTGCTCTTGCAAGGGCTTCT    | miR-431-3p    |
| CTCCTGGGGCCCCGACTCTCGC     | miR-1343      |
| TTTGTGACCTGGTCCACTAACC     | miR-758-3p    |
| AGCCCGCCCCAGCCGAGGTTCT     | miR-4707-3p   |
| GTTCTGCTGAACTGAGCCAG       | miR-3074-5p   |
| CGGATGAGCAAAGAAAGTGGTT     | miR-1255b-5p  |
| TCACCCTGCATCCCGCACCCAG     | miR-3620-3p   |
| GCTGGTTTTCATATGGTGGTTTTAGA | miR-29b-1-5p  |
| CTCTCACCCTGCCCTCCCACAG     | miR-1229-3p   |
| TAGCACCATTTGAAATCAGTGTT    | miR-29b-3p    |
| TGCCCTGCCTGTTTTCTCCTTT     | miR-3173-5p   |
| ATCCCCAGATACAATGGACAA      | miR-2355-5p   |
| CTGCCCTAGTCTAGCTGAAGCT     | miR-3157-3p   |
| ACTGGACTTGGAGCCAGAAG       | miR-378f      |
| TGAGCCCTGTCTCCCGCAG        | miR-1233-3p   |
| CTTGGCACCTAGCAAGCACTCA     | miR-1271-5p   |
| CTGGAGATATGGAAGAGCTGTGT    | miR-1270      |
| CTTTCAGTCGGATGTTTGCAGC     | miR-30a-3p    |
| GCTGCGCTTGGATTTGTCGTC      | miR-191-3p    |
| ACTGGACTTGGAGGCAGAA        | miR-378b      |
| GCAAAGCACACGGCCTGCAGAGA    | miR-330-3p    |
| CCACTTGGATCTGAAGGCTGCC     | miR-3614-5p   |
| ACAGGTGAGGTTCTTGGGAGCC     | miR-125a-3p   |
| TTGGCCATGGGGCTGCGCGG       | miR-3187-3p   |
| TTAATATCGGACAACCATTGT      | miR-889       |
| ATCCTTGCTATCTGGGTGCTA      | miR-502-5p    |
| TAACAGTCTCCAGTCACGGCC      | miR-212-3p    |
| TGACAGCGCCCTGCCTGGCTC      | miR-2277-3p   |
| GGGACTAGGATGCAGACCTCC      | miR-6503-3p   |
| TTCCCTTTGTCTATCCTATGCCT    | miR-204-5p    |
| CAGCAGCAATTCAATGTTTTGAA    | miR-424-5p    |
| GGAGACTGATGAGTTCCCGGGA     | miR-873-3p    |
| AGCTTCTTTACAGTGCTGCCTTG    | miR-103a-2-5p |
| ACTGATTTCTTTTGGTGTTTCCAG   | miR-29a-5p    |
| TTCTGCCTCTGTCCAGGTCCTT     | miR-5001-3p   |
| AGTTCTTTCAGTGGCAAGCTTTA    | miR-22-5p     |
| TGACCGATTTCTCCTGGTGTTT     | miR-29c-5p    |
| ACTGGACTTGGAGTCAGAAA       | miR-378d      |
| AGCTTCCATGACTCCTGATGGA     | miR-2115-5p   |
| TTCAACGGGTATTTATTGAGCA     | miR-95        |
| TTTGTTCGTTCCGGCTCGCGTGA    | miR-375       |
| TGGGGAGCTGAGGCTCTGGGGGTG   | miR-939-5p    |
| TCAGGTGTGGAAGTGGAGCAG      | miR-3934-5p   |
| TGATCAGGCAAAATGCAGACT      | miR-4772-5p   |
| TTTTGCGATGTGTTCCCTAATAT    | miR-450a-5p   |
| CCAGTGGGGCTGCTGTTATCTG     | miR-194-3p    |
| TTTGTAGACGGGGTCTTGCTCT     | miR-1303      |
| TGATTGGTACGTCTGTGGGTAG     | miR-509-3p    |
| TGTGAGGTTGGCATTGTTGTCT     | miR-1294      |
| TGGCAGTGTCTTAGCTGGTTGT     | miR-34a-5p    |

|                          |               |
|--------------------------|---------------|
| TCATCCTCGTCTCCCTCCCAG    | miR-5196-3p   |
| GTGAGTCTCTAAGAAAAGAGGA   | miR-627       |
| TGTCACTCGGCTCGGCCACTAC   | miR-668       |
| ACTGGACTTGGAGTCAGGA      | miR-378e      |
| GGGGCTGGGCGCGCGCC        | miR-4492      |
| TCCTTCTGCTCCGTCCCCCAG    | miR-1237-3p   |
| CCAGTCCTGTGCCTGCCGCCT    | miR-1910      |
| TGAGGATGGATAGCAAGGAAGCC  | miR-3605-5p   |
| AGCTGGTGTGTGAATCAGGCCG   | miR-138-5p    |
| TATGTCTGCTGACCATCACCTT   | miR-654-3p    |
| GGTGCAGTGTGCATCTCTGGT    | miR-143-5p    |
| CTGGTACAGGCCCTGGGGACAG   | miR-150-3p    |
| GCGACCCACTCTTGGTTTCCA    | miR-551a      |
| ACCGTGGCTTTTCGATTGTTACT  | miR-132-5p    |
| CGGCCCGGCTGCTGCTGTTCCCT  | miR-1538      |
| ACTCAAACCCTTCAGTGACTT    | miR-616-5p    |
| AAGGAGCTTACAATCTAGCTGGG  | miR-708-5p    |
| TCCTTCTCTCCCTCCTCCCAG    | miR-877-3p    |
| ATATACAGGGGAGACTCTTAT    | miR-1185-1-3p |
| TAGCAGCACAGAAATATTGGC    | miR-195-5p    |
| GTTCTCCCAACGTAAGCCCAGC   | miR-629-3p    |
| AAAGACATAGGATAGAGTCACCTC | miR-641       |
| TACCCTGTAGAACCGAATTTGTG  | miR-10b-5p    |
| ACTGGACTAGGAGTCAGAAGG    | miR-378i      |
| CAGCCCTCCTCCCGCACCCAAA   | miR-4687-5p   |
| ACCTTCCTCTCCAATGGGTCTTT  | miR-3667-3p   |
| GAAGAACTGTTGCATTTGCCCT   | miR-4511      |
| AGAGTCGGCGACGCCGCCAGC    | miR-4785      |
| AGCTCTAGAAAGATTGTTGACC   | miR-6502-5p   |
| GCAGGAACCTGTGAGTCTCCT    | miR-873-5p    |
| TGGCCCTGACTGAAGACCAGCAGT | miR-1291      |
| TGGAGACGCGCCCTGTTGGAGT   | miR-139-3p    |
| AGGGGCTGGCTTTCCCTCTGGTC  | miR-185-3p    |
| AGGCAGTGTAGTTAGCTGATTGC  | miR-34c-5p    |
| AGCCTGGAAGCTGGAGCCTGCAGT | miR-1254      |
| AACTAGCTCTGTGGATCCTGAC   | miR-4661-5p   |
| TCTTTGGTTATCTAGCTGTATGA  | miR-9-5p      |
| AAAAACTGAGACTACTTTTGCA   | miR-548e      |
| TAATTTTATGTATAAGCTAGT    | miR-590-3p    |
| AACTGGCCTACAAAGTCCCAGT   | miR-193a-3p   |
| CTGGGCCCGCGGGCGTGGGG     | miR-6724-5p   |
| TTTGGGATTGACGCCACATGTCT  | miR-6513-5p   |
| ATTGTCCCTCTCCCTTCCCAG    | miR-4646-3p   |
| CACAGCAAGTGTAGACAGGCA    | miR-3120-3p   |
| TCAAGAGCAATAACGAAAAATGT  | miR-335-5p    |
| TGGTAGACTATGGAACGTAGG    | miR-379-5p    |
| TAGGTTATCCGTGTTGCCTTCG   | miR-154-5p    |
| CAACAAATCACAGTCTGCCATA   | miR-7-1-3p    |
| CTATACGGCCTCCTAGCTTTCC   | let-7e-3p     |
| AGGAGGAATTGGTGTCTGGTCTT  | miR-766-5p    |
| AGGGGGCGGGCTCCGGCG       | miR-4488      |
| TAGATAAAATATTGGTACCTG    | miR-577       |
| GGCCAGCCACCAGGAGGGCTG    | miR-3194-5p   |
| AAAAGTATTTGCGGGTTTTGTC   | miR-5481      |
| TGCCTAGGCTGAGACTGCAGTG   | miR-3135a     |
| CTGTTGCCACTAACCTCAACCT   | miR-744-3p    |
| CTATACAATCTACTGTCTTTC    | let-7a-3p     |
| TCAGCACCAGGATATTGTTGGAG  | miR-3065-3p   |
| CTGACTGTTGCCGTCCCTCCAG   | miR-943       |

|                         |              |
|-------------------------|--------------|
| AGGGGGATGGCAGAGCAAAATT  | miR-5010-5p  |
| CCAATATTACTGTGCTGCTTTA  | miR-16-2-3p  |
| ATCAGGGCTTGTGGAATGGGAAG | miR-3127-5p  |
| ATCCCACCTCTGCCACCA      | miR-1260a    |
| TGAGCTAAATGTGTGCTGGGA   | miR-610      |
| AACCATCGACCGTTGAGTGGAC  | miR-181c-3p  |
| GGAGAAATTATCCTTGGTGTGT  | miR-539-5p   |
| CATCATCGTCTCAAATGAGTCT  | miR-136-3p   |
| ATTGTCCTTGCTGTTTGGAGAT  | miR-2355-3p  |
| TGACCTGGGACTCGGACAGCTG  | miR-3661     |
| GCAGCCCAGCTGAGGCCTCTG   | miR-4690-3p  |
| CCAACCTAGGTGGTCAGAGTTG  | miR-4714-3p  |
| AATCATAACAGGGACATCCAGTT | miR-487a     |
| TTAGCCAATTGTCCATCTTTAG  | miR-4662a-5p |
| TGCCGCCCTCTCGCTGCTCTAG  | miR-4632-3p  |
| CGCCCTCCTGCCCCACAG      | miR-4749-3p  |
| ACCTTGGCTCTAGACTGCTTACT | miR-212-5p   |
| TACGCGCAGACCACAGGATGTC  | miR-3939     |
| AAAAGTTATTGCGGTTTTGGCT  | miR-548at-5p |
| AGGGACGGGACGCGGTGCAGTG  | miR-92b-5p   |
| AGACAGTAGTTCTTGCCTGGTT  | miR-4645-3p  |
| ACCTCCTGTGTGCATGGATTA   | miR-660-3p   |
| TAGGATTACAAGTGTGCGCCAC  | miR-3159     |
| TTCAGCCAGGCTAGTGCAGTCT  | miR-3157-5p  |
| TGGGCAGGGGCTTATTGTAGGAG | miR-6721-5p  |
| CAGCCCGGATCCCAGCCCACTT  | miR-3940-3p  |
| GGGCTCACATCACCCCAT      | miR-4284     |
| TGTCGTGGGGCTTGCTGGCTTG  | miR-4440     |
| CATCCGTCCGTCTGTCCAC     | miR-4800-3p  |
| TTTCCCTTTCCATCCTGGCAG   | miR-5006-3p  |
| AGTGCTGAGGGAGTAAGAGCCC  | miR-550a-5p  |
| AAAAGTAATTGTGGTTTTTGC   | miR-548ay-5p |
| TTGGAGGCGTGGGTTTT       | miR-4443     |
| CAGTTATCACAGTGTGATGCT   | miR-101-5p   |
| CCAGGCTCTGCAGTGGGA      | miR-3155b    |
| AAACAAACATGGTGCACCTTCTT | miR-495-3p   |
| ATGGCATCGTCCCCTGGTGGCT  | miR-4642     |
| TCAGTTCCAGGCCAACAGGCT   | miR-584-3p   |
| AAAAGTAATTGCGGTTTTTGC   | miR-548au-5p |
| GGGTGCGGGCCGCGGGG       | miR-4466     |
| TTACACAGCTGGACAGAGGCA   | miR-4672     |
| CTGCCAATTCCATAGGTCACAG  | miR-192-3p   |
| AAGTGCCCCCACAGTTTGAGTGC | miR-371b-3p  |
| AGGTTACCCGAGCAACTTTGCAT | miR-409-5p   |
| TTAATTTTTTTGTTTCGGTCACT | miR-4775     |
| TACCCAGTCTCCGGTGCAGCC   | miR-3130-5p  |
| GCTAAGGAAGTCTGTGCTCAG   | miR-4521     |
| TAACGCATAATATGGACATGT   | miR-3912     |
| CTTAGCAGGTTGTATTATCATT  | miR-374b-3p  |
| CCAGAGCAGCCTGCGGTAACAGT | miR-6501-3p  |
| CGGGTAGAGAGGGCAGTGGGAGG | miR-197-5p   |
| TCTATACAGACCTGGCTTTTC   | miR-1284     |
| AGAGCTGGCTGAAGGGCAG     | miR-4487     |
| TCGGCCTGACCACCCACCCAC   | miR-1234-3p  |
| TGTGACAGATTGATAACTGAAA  | miR-542-3p   |
| TAAGGTGCATCTAGTGCAGTTAG | miR-18b-5p   |
| TGAGTATTACATGGCCAATCTC  | miR-496      |
| GAGCCAGTGGTGAGACAGTGA   | miR-4676-5p  |
| TTTCTTCTTAGACATGGCAACG  | miR-4659a-3p |

|                         |             |
|-------------------------|-------------|
| AGACCCCTGGTCTGCACTCTATC | miR-504     |
| ACGGTGTGGATGTGGCCTTT    | miR-1250    |
| TCGTGTCTTGTGTGCAGCCGG   | miR-187-3p  |
| TGAGGCGGGGGGCGAGC       | miR-6087    |
| TGAGGCTCTGTTAGCCTTGGCTC | miR-2467-5p |
| GATATCAGCTCAGTAGGCACCG  | miR-3074-3p |
| CCAGTTACCGCTTCCGCTACCGC | miR-935     |
| TTTGGGACTGATCTTGATGTCT  | miR-3913-5p |
| CTCGGGCGGAGGTGGTTGAGTG  | miR-4750-5p |
| CCTCCCATGCCAAGAACTCCC   | miR-2116-3p |
| TAGGGGCAGCAGAGGACCTGGG  | miR-4688    |
| CCAGGCTCTGCAGTGGGAACT   | miR-3155a   |
| TATAAAAATGAGGGCAGTAAGAC | miR-3163    |
| TGAGGATATGGCAGGGAAGGGGA | miR-3679-5p |
| TGGACGGAGAAGTATAAGGGT   | miR-184     |
| AAAGCTGGGTTGAGAAGG      | miR-320e    |
| CTTCCTCGTCTGTCTGCCCC    | miR-1238-3p |
| TCTGGCTCCGTGTCTTCACTCCC | miR-149-5p  |
| AGGATGAGCAAAGAAAGTAGATT | miR-1255a   |
| ATAGGACTCATATAGTGCCAG   | miR-3117-3p |
| TAGGTAGTTTTCATGTTGTTGGG | miR-196a-5p |
| CACTGTGGGTACATGCT       | miR-4318    |
| TTTGAGGCTACAGTGAGATGTG  | miR-1304-5p |
| CTAGGTATGGTCCCAGGGATCC  | miR-331-5p  |
| AGGGACTTTCAGGGGCAGCTGT  | miR-365b-5p |
| AGGAGATCCTGGGTT         | miR-3676-5p |
| TCAACAAAATCACTGATGCTGGA | miR-3065-5p |
| TCTCTTCATCTACCCCCCAG    | miR-6515-3p |
| TAGTGAGTTAGAGATGCAGAGCC | miR-3174    |
| CTCGTGGGCTCTGGCCACGGCC  | miR-3677-3p |
| CAAGCTCGCTTCTATGGGTCTG  | miR-99a-3p  |
| TTATTGTACGTTCTGATT      | miR-5701    |
| ATCCGCGCTCTGACTCTCTGCC  | miR-937-3p  |
| CGTCCCACCCCCACTCCTGT    | miR-4433-5p |
| CCCCGGGAGCCCCGGCG       | miR-4532    |
| TTTCTATTTCTCAGTGGGGCTC  | miR-4482-3p |
| TAAAGAGCCCTGTGGAGACA    | miR-1276    |
| TACTTTTCTAGGTTGTTGGGG   | miR-5003-3p |

1644-1115 = 529 miRs >=100 reads tsample size limit

sum =

|            |
|------------|
| 529 miRs   |
| XX samples |

counts shown are exact matches + inclusions

each miR ranked by total reads

|                          |             |
|--------------------------|-------------|
| 529 mature miRNAs:       | ID          |
| TATTGCACTTGTCCCGCCTGT    | miR-92a-3p  |
| CAACGGAATCCCAAAAGCAGCTG  | miR-191-5p  |
| TCTCCAACCCTTGTACCAGTG    | miR-150-5p  |
| TGAGGTAGTAGGTTGTATAGTT   | let-7a-5p   |
| AACATTC AACGCTGTCGGTGAGT | miR-181a-5p |

|                          |             |
|--------------------------|-------------|
| TAGCAGCACGTAATATTGGCG    | miR-16-5p   |
| TTCAAGTAATCCAGGATAGGCT   | miR-26a-5p  |
| AAACCGTTACCATTACTGAGTT   | miR-451a    |
| AAGCTGCCAGTTGAAGAACTGT   | miR-22-3p   |
| CATTGCACTTGTCTCGGTCTGA   | miR-25-3p   |
| TGAGGTAGTAGTTTGTGCTGTT   | let-7i-5p   |
| TGTAAACATCCCCGACTGGAAG   | miR-30d-5p  |
| TGAGGTAGTAGTTTGTACAGTT   | let-7g-5p   |
| TGAGGTAGTAGTTTGTGTTGTT   | let-7b-5p   |
| TGAGGTAGTAGATTGTATAGTT   | let-7f-5p   |
| AGCTCGGTCTGAGGCCCTCAGT   | miR-423-3p  |
| TTCAAGTAATTCAGGATAGGT    | miR-26b-5p  |
| AGCAGCATTGTACAGGGCTATGA  | miR-103a-3p |
| CAAAGAATTCTCCTTTTGGGCT   | miR-186-5p  |
| CACTAGATTGTGAGCTCCTGGA   | miR-28-3p   |
| ACTGGACTTGGAGTCAGAAGG    | miR-378a-3p |
| CAAAGTGCTGTTCTGTCAGGTAG  | miR-93-5p   |
| TCAGTGCACACTACAGAACCTTGT | miR-148a-3p |
| TGTCAGTTTGTCAAATACCCCA   | miR-223-3p  |
| TGAGAACTGAATTCATAGGCT    | miR-146b-5p |
| TACCACAGGGTAGAACCACGG    | miR-140-3p  |
| AAAAGCTGGGTTGAGAGGGCGA   | miR-320a    |
| TTTGGCAATGGTAGAACTCACACT | miR-182-5p  |
| TCGAGGAGCTCACAGTCT       | miR-151b    |
| TCAGTGCATCACAGAACCTTGT   | miR-148b-3p |
| TGTAAACATCCTACACTCTCAGC  | miR-30c-5p  |
| AGAGGTAGTAGGTTGCATAGTT   | let-7d-5p   |
| TGTAAACATCCTTGACTGGAAG   | miR-30e-5p  |
| TAGCTTATCAGACTGATGTTGA   | miR-21-5p   |
| TCGAGGAGCTCACAGTCTAGT    | miR-151a-5p |
| TAGCAGCACATCATGGTTTACA   | miR-15b-5p  |
| CTAGACTGAAGCTCCTTGAGG    | miR-151a-3p |
| TGAGAACTGAATTCATGGGTT    | miR-146a-5p |
| CACCCGGCTGTGTGCACATGTGC  | miR-941     |
| TGAGGGGCAGAGAGCGAGACTTT  | miR-423-5p  |
| TTCAACCACCTTCTCCACCCAGC  | miR-197-3p  |
| AACATTCAATTGCTGTCGGTGGGT | miR-181b-5p |
| TCAGGCTCAGTCCCCCTCCGAT   | miR-484     |
| CTGACCTATGAATTGACAGCC    | miR-192-5p  |
| TCTCACACAGAAATCGCACCCGT  | miR-342-3p  |
| AGCTACATCTGGCTACTGGGT    | miR-222-3p  |
| TTCACAGTGGCTAAGTTCTGC    | miR-27b-3p  |
| TCTCTCGGCTCCTCGGGCTC     | miR-3615    |
| GGATATCATCATATACTGTAAG   | miR-144-5p  |
| TGAGATGAAGCACTGTAGCTC    | miR-143-3p  |
| TCGGATCCGTCTGAGCTTGGCT   | miR-127-3p  |
| ATCACATTGCCAGGGATTTCC    | miR-23a-3p  |
| AATGGCGCCACTAGGGTTGTG    | miR-652-3p  |
| CTTTCAGTCCGATGTTTACAGC   | miR-30e-3p  |
| CAACACCAGTCGATGGGCTGT    | miR-21-3p   |
| TACAGTACTGTGATAACTGAA    | miR-101-3p  |
| AATGACACGATCACTCCCGTTGA  | miR-425-5p  |
| AACATTCAACCTGTCGGTGAGT   | miR-181c-5p |
| TTAATGCTAATCGTGATAGGGGT  | miR-155-5p  |
| TCCCTGAGACCCTTAACCTGTGA  | miR-125a-5p |
| AGCTACATTGTCTGCTGGGTTTC  | miR-221-3p  |
| TGAGACCTCTGGGTTCTGAGCT   | miR-769-5p  |
| CATTATTACTTTTGGTACGCG    | miR-126-5p  |
| CATAAAGTAGAAAAGCACTACT   | miR-142-5p  |



|                         |               |
|-------------------------|---------------|
| GCCCTGACCTGTCTGTTCTG    | miR-4732-3p   |
| CAAAGTGCTTACAGTGCAGGTAG | miR-17-5p     |
| TGTAAACATCCTACACTCAGCT  | miR-30b-5p    |
| TAAAGTGCTTATAGTGCAGGTAG | miR-20a-5p    |
| TGGCTCAGTTCAGCAGGAACAG  | miR-24-3p     |
| TATGGCACTGGTAGAATTCACT  | miR-183-5p    |
| CTATACGACCTGCTGCCTTTCT  | let-7d-3p     |
| CGGGGCAGCTCAGTACAGGAT   | miR-486-3p    |
| TGAGGTAGTAAGTTGTATTGTT  | miR-98-5p     |
| CATGCCTTGAGTGTAGGACCGT  | miR-532-5p    |
| TAGCACCATCTGAAATCGGTTA  | miR-29a-3p    |
| GAATGTTGCTCGGTGAACCCCT  | miR-409-3p    |
| ATGCACCTGGGCAAGGATTCTG  | miR-500a-3p   |
| CACCCGTAGAACCGACCTTGCG  | miR-99b-5p    |
| TGCGGGGCTAGGGCTAACAGCA  | miR-744-5p    |
| ATCACATTGCCAGGATTACC    | miR-23b-3p    |
| AATTGCACGGTATCCATCTGTA  | miR-363-3p    |
| ACTCGGCGTGGCGTCGGTCGTG  | miR-1307-3p   |
| TATTGCACTCGTCCCGGCCTCC  | miR-92b-3p    |
| TTATAAAGCAATGAGACTGATT  | miR-340-5p    |
| TTACAGTGGCTAAGTTCCGC    | miR-27a-3p    |
| CCTCTGGGCCCTTCTCCAG     | miR-326       |
| CTGGCCCTCTCTGCCCTTCCGT  | miR-328       |
| TCGTACCGTGAGTAATAATGCG  | miR-126-3p    |
| TCACAGTGAACCGGTCTCTTT   | miR-128       |
| TGAGGTAGGAGTTGTATAGTT   | let-7e-5p     |
| ACCACTGACCGTTGACTGTACC  | miR-181a-2-3p |
| TACAGTATAGATGATGTACT    | miR-144-3p    |
| GCTGACTCCTAGTCCAGGGCTC  | miR-345-5p    |
| CAGTGCAATGTTAAAAGGGCAT  | miR-130a-3p   |
| TAGCAGCACATAATGGTTTGTG  | miR-15a-5p    |
| AAGGAGCTCACAGTCTATTGAG  | miR-28-5p     |
| TCCGGTTCTCAGGGCTCCACC   | miR-671-3p    |
| CCGCACTGTGGGTACTTGCTGC  | miR-106b-3p   |
| TGCCCTGTGGACTCAGTTCTGG  | miR-146b-3p   |
| TAGTGCAATATTGCTTATAGGGT | miR-454-3p    |
| GCCCCTGGGCCTATCCTAGAA   | miR-331-3p    |
| CAGTGCAATGATGAAAGGGCAT  | miR-130b-3p   |
| AGGGGTGCTATCTGTGATTGA   | miR-342-5p    |
| TACCCTGTAGATCCGAATTTGTG | miR-10a-5p    |
| TGTAACAGCAACTCCATGTGGA  | miR-194-5p    |
| TACCATTGCATATCGGAGTTG   | miR-660-5p    |
| ACCCCACTCCTGGTACC       | miR-4286      |
| TTATCAGAATCTCCAGGGGTAC  | miR-361-5p    |
| TAAAGTGCTGACAGTGCAGAT   | miR-106b-5p   |
| TGGAGAGAAAGGCAGTTCCTGA  | miR-185-5p    |
| ACCATCGACCGTTGATTGTACC  | miR-181a-3p   |
| TCCCCAGGTGTGATTCTGATTT  | miR-361-3p    |
| GTCCAGTTTTCCCAGGAATCCCT | miR-145-5p    |
| CAAAGTGCTCATAGTGCAGGTAG | miR-20b-5p    |
| AGGCAAGATGCTGGCATAGCT   | miR-31-5p     |
| TGAGGTAGTAGTTGTATGGTT   | let-7c        |
| TGTAAACATCCTCGACTGGAAG  | miR-30a-5p    |
| ACAGTAGTCTGCACATTGGTTA  | miR-199a-3p   |
| ACAGTAGTCTGCACATTGGTTA  | miR-199b-3p   |
| TATTCATTTATCCCCAGCCTACA | miR-664a-3p   |
| ACTGCCCCAGGTGCTGCTGG    | miR-324-3p    |
| TAACAGTCTACAGCCATGGTCCG | miR-132-3p    |
| AATATAACACAGATGGCCTGT   | miR-410       |

|                          |              |
|--------------------------|--------------|
| AAAGTTCTGAGACACTCCGACT   | miR-148a-5p  |
| TGTAGTGTTCCTACTTTATGGA   | miR-142-3p   |
| ACTCTTTCCCTGTTGCACTAC    | miR-130b-5p  |
| CTGCCCTGGCCCCGAGGGACCGA  | miR-874      |
| TGAGCGCCTCGACGACAGAGCCG  | miR-339-3p   |
| ACTCCAGCCCCACAGCCTCAGC   | miR-766-3p   |
| TGGGTCTTTGCGGGCGAGATGA   | miR-193a-5p  |
| AATGCACCCGGGCAAGGATTCT   | miR-501-3p   |
| CCTGTTCTCCATTACTTGGCTC   | miR-26b-3p   |
| CCCAGTGTTCAGACTACCTGTTT  | miR-199a-5p  |
| CACGCTCATGCACACACCCACA   | miR-574-3p   |
| TCGACCGACCTCGACCGGCT     | miR-1307-5p  |
| AACATTCATTGTTGTGCGGTGGGT | miR-181d     |
| TGGGTTTACGTTGGGAGAACT    | miR-629-5p   |
| CTGTGCGTGTGACAGCGGCTGA   | miR-210      |
| AAGTTCTGTTATACACTCAGGC   | miR-148b-5p  |
| ATCGGGAATGTGCTGTCGCCCC   | miR-425-3p   |
| TGAGAACCACGTCTGCTCTGAG   | miR-589-5p   |
| ACTGCTGAGCTAGCACTTCCCC   | miR-93-3p    |
| GTAGAGGAGATGGCGCAGGG     | miR-877-5p   |
| TCCGTCTCAGTTACTTTATAGC   | miR-340-3p   |
| TGTGCAAATCCATGCAAAACTGA  | miR-19b-3p   |
| TTTCCGGCTCGCGTGGGTGTGT   | miR-1180     |
| CAAAACGTGAGGCGCTGCTAT    | miR-424-3p   |
| ATCAACAGACATTAATTGGGCGC  | miR-421      |
| TCTTCTCTGTTTTGGCCATGTG   | miR-942      |
| CCTCCCACACCCAAGGCTTGCA   | miR-532-3p   |
| CGTGTATTTGACAAGCTGAGTT   | miR-223-5p   |
| AAAAGTGCTTACAGTGCAGGTAG  | miR-106a-5p  |
| TATACAAGGGCAAGCTCTCTGT   | miR-381-3p   |
| TGTCTCTAGGGCCTGCAGTCT    | miR-3909     |
| ACTGTAAACGCTTCTGATG      | miR-3607-3p  |
| TTTTGTGTCTCCCATTCCCCAG   | miR-5010-3p  |
| AATCCTTGGAACCTAGGTGTGAGT | miR-362-5p   |
| TCTACAGTGCACGTGTCTCCAGT  | miR-139-5p   |
| TCCCTGTCTCCAGGAGCTCACG   | miR-339-5p   |
| GGCGGGTGCGGGGGTGG        | miR-3656     |
| CAGTGCAATAGTATTGTCAAAGC  | miR-301a-3p  |
| CGTCAACACTTGTCTGGTTTCCT  | miR-505-3p   |
| TTGGGAAACGGCCGCTGAGTG    | miR-2110     |
| CAGTGGTTTTACCCTATGGTAG   | miR-140-5p   |
| TCCAGCATCAGTGATTTTGTG    | miR-338-3p   |
| CCTCCTGCCCTCCTTGCTGT     | miR-1976     |
| TAATACTGCCGGTAATGATGGA   | miR-200c-3p  |
| AATGGATTTTTGGAGCAGG      | miR-1246     |
| TAGCACCATTTGAAATCGGTTA   | miR-29c-3p   |
| CACCTTGCGCTACTCAGGTCTG   | miR-3200-3p  |
| AAACTCTACTTGTCCCTTCTGAGT | miR-618      |
| TAGGTAGTTTCCTGTTGTTGGG   | miR-196b-5p  |
| CTCCGTTTGCCTGTTTCGCTG    | miR-1468     |
| TCTAGTAAGAGTGGCAGTCEGA   | miR-628-3p   |
| CCCAGTGTTTAGACTATCTGTTT  | miR-199b-5p  |
| ACGCCCTTCCCCCCTTCTTCA    | miR-1249     |
| TGTGACTGGTTGACCAGAGGGG   | miR-134      |
| TCAGTGCATGACAGAACTTGG    | miR-152      |
| CTCCTGACTCCAGGTCTCTGTGT  | miR-378a-5p  |
| GTATACACGGCTCTCCTCTCT    | miR-485-3p   |
| TGTTCTCTGTCTCCAGAC       | miR-4326     |
| AAAAGTACTTGCGGATTT       | miR-548av-5p |

|                          |               |
|--------------------------|---------------|
| TCTTGGAGTAGGTCATTGGGTGG  | miR-432-5p    |
| ATTCTAATTTCTCCACGTCTTT   | miR-576-5p    |
| CAGGGCTGGCAGTGACATGGGT   | miR-4446-3p   |
| AGGCGGAGACTTGGGCAATTG    | miR-25-5p     |
| AAAAGTACTTGGCGATTTTGCT   | miR-548k      |
| TTGTACATGGTAGGCTTTCATT   | miR-493-5p    |
| AGGGGAAAGTTCTATAGTCC     | miR-625-5p    |
| ACCTGGCATAACAATGTAGATTT  | miR-221-5p    |
| GAGTTCTACAGTCAGAC        | miR-3168      |
| ATATAATACAACCTGCTAAGTG   | miR-374b-5p   |
| AGCAGCATTGTACAGGGCTATCA  | miR-107       |
| CCTCCGTGTTACCTGTCTCTAG   | miR-3605-3p   |
| TTATGGTTTGCCTGGGACTGAG   | miR-584-5p    |
| TCCCTGAGACCCTAACTTGTGA   | miR-125b-5p   |
| TAAGTGGTTGAACAACCTGAACC  | miR-582-3p    |
| AAGGGCTTCCCTCTCTGCAGGAC  | miR-3158-3p   |
| CGCATCCCCTAGGGCATTGGTGT  | miR-324-5p    |
| ACTGGCCTGGGACTACCGG      | miR-3176      |
| GGGGTTCCTGGGGATGGGATTT   | miR-23a-5p    |
| CAAGTCACTAGTGGTTCCGTT    | miR-224-5p    |
| TGAGTGTGTGTGTGTGAGTGTGT  | miR-574-5p    |
| TGAGGAGATCGTCGAGGTTGG    | miR-3150b-3p  |
| TAAGGTGCATCTAGTGCAGATAG  | miR-18a-5p    |
| GCCTGTGTTGGGTGGAACCTGGT  | miR-370       |
| AGTGCCTGAGGGAGTAAGAG     | miR-550a-3-5p |
| TCAGAACAAATGCCGGTTCCCAGA | miR-589-3p    |
| TTTGGTCCCCTTCAACCAGCTG   | miR-133a      |
| TGTAGAGCAGGGAGCAGGAAGCT  | miR-4732-5p   |
| CAGCCCCACAGCCTCAGA       | miR-4323      |
| ACTCAAAGATGGCGGCACCTTT   | miR-371b-5p   |
| TAGTAGACCGTATAGCGTACG    | miR-411-5p    |
| CCTCACCATCCCCTTCTGCCTGC  | miR-6511a-3p  |
| TCTGGGCAACAAAGTGAGACCT   | miR-1285-3p   |
| CTGGGAGAGGGTTGTTTACTCC   | miR-30c-1-3p  |
| TCTCTGGGCCTGTGTCTTAGGC   | miR-330-5p    |
| AGGGCTTAGCTGCTTGTGAGCA   | miR-27a-5p    |
| TGATATGTTTGATATATTAGGT   | miR-190a      |
| TCAGCTACTACCTCTATTAGG    | miR-5690      |
| AACCCGTAGATCCGAACTTGTG   | miR-100-5p    |
| ACTGCCCTAAGTGCTCCTTCTGG  | miR-18a-3p    |
| CTGTACAGGCCACTGCCTTGC    | let-7g-3p     |
| AATCCTTTGTCCCTGGGTGAGA   | miR-501-5p    |
| TGTCTTGCAGGCCGTCATGCA    | miR-431-5p    |
| AGGTTGGGATCGGTTGCAATGCT  | miR-92a-1-5p  |
| AAAAGCTGGGTTGAGAGGGCAA   | miR-320b      |
| GGGAGAAGGGTCGGGGC        | miR-4516      |
| TTGCAGCTGCCTGGGAGTGACTTC | miR-1301      |
| AATCCTTGCTACCTGGGT       | miR-500b      |
| TTTTTCATTATTGCTCCTGACC   | miR-335-3p    |
| CCGGTCCCAGGAGAACCTGCAGA  | miR-4746-5p   |
| TTATAATACAACCTGATAAGTG   | miR-374a-5p   |
| TTAGGGCCCTGGCTCCATCTCC   | miR-1296      |
| ACTGCAGTGAAGGCACTTGTAG   | miR-17-3p     |
| AGGGCCCCCTCAATCCTGT      | miR-296-5p    |
| AAGTGGCCCTCAAAGTCCCGCT   | miR-193b-3p   |
| TTACAGTTGTTCAACCAGTTACT  | miR-582-5p    |
| TGCCTACTGAGCTGAAACACAG   | miR-24-2-5p   |
| TGTCTTACTCCCTCAGGCACAT   | miR-550a-3p   |
| GAAGTTGTTTCGTGGTGGATTCCG | miR-382-5p    |

|                          |              |
|--------------------------|--------------|
| CTGCGCAAGCTACTGCCTTGCT   | let-7i-3p    |
| CGAATCATTATTTGCTGCTCTA   | miR-15b-3p   |
| TAAATGCCCCCTAAAAATCCTTAT | miR-365a-3p  |
| TAAATGCCCCCTAAAAATCCTTAT | miR-365b-3p  |
| ATCATGATGGGCTCCTCGGTGT   | miR-433      |
| CGTGCCACCCTTTTCCCCAG     | miR-1227-3p  |
| AATGCACCTGGGCAAGGATTCA   | miR-502-3p   |
| AATCGTACAGGGTCATCCACTT   | miR-487b     |
| TAATACTGCCTGGTAATGATGA   | miR-200b-3p  |
| TCGGGGATCATCATGTCACGAGA  | miR-542-5p   |
| TGATATGTTTGATATTGGGTT    | miR-190b     |
| AATCTGAGAAGGCGCACAAAGT   | miR-3200-5p  |
| CGGGCGTGGTGGTGGGGG       | miR-1268a    |
| CATCAGAATTCATGGAGGCTAG   | miR-2115-3p  |
| ACCTGGACCCAGCGTAGACAAAG  | miR-3690     |
| GACTATAGAACTTTCCCCCTCA   | miR-625-3p   |
| TAAATCCTTGCTACCTGGGTGAGA | miR-500a-5p  |
| TGTGCAAATCTATGCAAAACTGA  | miR-19a-3p   |
| CTGGTTTACATGGTGGCTTAG    | miR-29b-2-5p |
| AAAAGCTGCAGTTACTTTTGC    | miR-548av-3p |
| AAAAGCTGGGTTGAGAGGA      | miR-320d     |
| TGTGCTTGCTCGTCCCGCCCGCA  | miR-636      |
| CCAAAAGCTGCAGTTACTTTTGC  | miR-548o-3p  |
| CAAGCTCGTGTCTGTGGGTCCG   | miR-99b-3p   |
| CGGCGGGGACGGCGATTGGTC    | miR-1908     |
| CATCCCTTGCATGGTGGAGGG    | miR-188-5p   |
| ACGTTGGCTCTGGTGGTG       | miR-1306-3p  |
| CTTATCAGATTGTATTGTAATT   | miR-374a-3p  |
| GTGGGGGAGAGGCTGTC        | miR-1275     |
| CCTCACCACCCCTTCTGCCTGCA  | miR-6511b-3p |
| GCGGGGCTGGGCGCGCG        | miR-4508     |
| AAACATTGCGGGTGCACCTTCTT  | miR-543      |
| AGGACCTTCCCTGAACCAAGGA   | miR-659-5p   |
| TGGAAGACTAGTGATTTTGTGT   | miR-7-5p     |
| TTCATTTGCCTCCCAGCCTACA   | miR-664b-3p  |
| AAAAGTAATTGCGGTCTTT      | miR-548ap-5p |
| TCTCACTGTAGCCTCGAACCCC   | miR-1304-3p  |
| AAAAGCTGGGTTGAGAGGGT     | miR-320c     |
| CCTGCAACTTTGCCTGATCAGA   | miR-4772-3p  |
| TCACCAGCCCTGTGTTCCCTAG   | miR-1226-3p  |
| AGAGGTTGCCCTTGGTGAATTC   | miR-377-5p   |
| TGCTGGATCAGTGGTTCGAGTC   | miR-1287     |
| TGAAGGTCTACTGTGTGCCAGG   | miR-493-3p   |
| AGTTGCCAGGGCTGCCTTTGGT   | miR-6501-5p  |
| ATCCCACCACTGCCACCAT      | miR-1260b    |
| TGCACGGCACTGGGGACACGT    | miR-3177-3p  |
| AAAAGTAATTGCGGTCTTTGGT   | miR-548j     |
| CACATTACACGGTCGACCTCT    | miR-323a-3p  |
| TTTGGCACTAGCACATTTTGGCT  | miR-96-5p    |
| ATGCTGACATATTTACTAGAGG   | miR-628-5p   |
| AACCCGTAGATCCGATCTTGTG   | miR-99a-5p   |
| CCACCTCCCCTGCAAACGTCCA   | miR-1306-5p  |
| TACGTATCGTTGTCATCGTCA    | miR-598      |
| CTAAGAAGTTGACTGAAG       | miR-3653     |
| TGGTGGGCCGAGAACATGTGC    | miR-654-5p   |
| ACCCTATCAATATGTCTCTGC    | miR-454-5p   |
| ATGCCAGAGCTCACACAGAGG    | miR-4435     |
| AGGAAGCCCTGGAGGGGCTGGAG  | miR-671-5p   |
| AAGGCAGGGCCCCCGCTCCCC    | miR-940      |

|                          |               |
|--------------------------|---------------|
| TGAAACATACACGGGAAACCTC   | miR-494       |
| AGAGGCTGGCCGTGATGAATTC   | miR-485-5p    |
| CTGGGAGGTGGATGTTTACTTC   | miR-30b-3p    |
| GGAGGAACCTTGGAGCTTCGGC   | miR-3928      |
| GTGAGGACTCGGGAGGTGG      | miR-1224-5p   |
| AGAGCTTAGCTGATTGGTGAAC   | miR-27b-5p    |
| GGGAGCCAGGAAGTATTGATGT   | miR-505-5p    |
| GTCCCTCTCCAAATGTGTCTTG   | miR-642a-5p   |
| CGGCTCTGGGTCTGTGGGGA     | miR-760       |
| AGTGGGGAACCCCTCCATGAGG   | miR-491-5p    |
| CAGCAGCACACTGTGGTTTGT    | miR-497-5p    |
| AGAGTTGAGTCTGGACGTCCCG   | miR-219-1-3p  |
| TCTGTGAGACCAAAGAACTACT   | miR-4677-3p   |
| CAGTGCAATGATATTGTCAAAGC  | miR-301b      |
| TATGGAAAGACTTTGCCACTCT   | miR-3688-3p   |
| TCAAGTGTCTATCTGTCCCTAG   | miR-6513-3p   |
| TCTCCCTTCCCTGCCCTGGCTAG  | miR-4685-3p   |
| TAGTGGTCAGAGGGCTTATGA    | miR-6718-5p   |
| CTGGGATCTCCGGGTCTTGGTT   | miR-769-3p    |
| AGGTCTGCATTCAAATCCCCAGA  | miR-6503-5p   |
| AGCGCGGGCTGAGCGCTGCCAGTC | miR-2277-5p   |
| CTTTCAGTCAGATGTTTGCTGC   | miR-30d-3p    |
| ACTGGGCTTGGAGTCAGAAG     | miR-378g      |
| CAGGTCTGTCTGCAGGGCTTCT   | miR-431-3p    |
| CTCCTGGGGCCCGCACTCTCGC   | miR-1343      |
| TTTGTGACCTGGTCCACTAACC   | miR-758-3p    |
| AGCCCGCCCCAGCCGAGGTTCT   | miR-4707-3p   |
| GTTCCCTGCTGAACTGAGCCAG   | miR-3074-5p   |
| CGGATGAGCAAAGAAAGTGGTT   | miR-1255b-5p  |
| TCACCCTGCATCCCGCACCCAG   | miR-3620-3p   |
| GCTGGTTTCATATGGTGGTTTAGA | miR-29b-1-5p  |
| CTCTCACCCTGCCCTCCCACAG   | miR-1229-3p   |
| TAGCACCATTTGAAATCAGTGTT  | miR-29b-3p    |
| TGCCCTGCCTGTTTTCTCCTTT   | miR-3173-5p   |
| ATCCCCAGATACAATGGACAA    | miR-2355-5p   |
| CTGCCCTAGTCTAGCTGAAGCT   | miR-3157-3p   |
| ACTGGACTTGGAGCCAGAAG     | miR-378f      |
| TGAGCCCTGTCCCTCCCGCAG    | miR-1233-3p   |
| CTTGGCACCTAGCAAGCACTCA   | miR-1271-5p   |
| CTGGAGATATGGAAGAGCTGTGT  | miR-1270      |
| CTTTCAGTCGGATGTTTGCAGC   | miR-30a-3p    |
| GCTGCGCTTGGATTCGTCCCC    | miR-191-3p    |
| ACTGGACTTGGAGGCAGAA      | miR-378b      |
| GCAAAGCACACGGCCTGCAGAGA  | miR-330-3p    |
| CCACTTGGATCTGAAGGCTGCCC  | miR-3614-5p   |
| ACAGGTGAGGTTCTTGGGAGCC   | miR-125a-3p   |
| TTGGCCATGGGGCTGCGCGG     | miR-3187-3p   |
| TTAATATCGGACAACCATTGT    | miR-889       |
| ATCCTTGCTATCTGGGTGCTA    | miR-502-5p    |
| TAACAGTCTCCAGTCACGGCC    | miR-212-3p    |
| TGACAGCGCCCTGCCTGGCTC    | miR-2277-3p   |
| GGGACTAGGATGCAGACCTCC    | miR-6503-3p   |
| TTCCCTTTGTCTATCCTATGCCT  | miR-204-5p    |
| CAGCAGCAATTTCATGTTTTGAA  | miR-424-5p    |
| GGAGACTGATGAGTTCCCGGGA   | miR-873-3p    |
| AGCTTCTTTACAGTGCTGCCTTG  | miR-103a-2-5p |
| ACTGATTTCTTTTGGTGTTTCAG  | miR-29a-5p    |
| TTCTGCCTCTGTCCAGTCCTT    | miR-5001-3p   |
| AGTTCTTTCAGTGGCAAGCTTTA  | miR-22-5p     |

|                          |               |
|--------------------------|---------------|
| TGACCGATTTCTCCTGGTGTTC   | miR-29c-5p    |
| ACTGGACTTGGAGTCAGAAA     | miR-378d      |
| AGCTTCCATGACTCCTGATGGA   | miR-2115-5p   |
| TTCAACGGGTATTTATTGAGCA   | miR-95        |
| TTTGTTCGTTTCGGCTCGCGTGA  | miR-375       |
| TGGGGAGCTGAGGCTCTGGGGGTG | miR-939-5p    |
| TCAGGTGTGGAACTGAGGCAG    | miR-3934-5p   |
| TGATCAGGCAAAATTGCAGACT   | miR-4772-5p   |
| TTTTGCGATGTGTTCCTAATAT   | miR-450a-5p   |
| CCAGTGGGGCTGCTGTTATCTG   | miR-194-3p    |
| TTTAGAGACGGGGTCTTGCTCT   | miR-1303      |
| TGATTGGTACGTCTGTGGGTAG   | miR-509-3p    |
| TGTGAGGTTGGCATTGTTGTCT   | miR-1294      |
| TGGCAGTGTCTTAGCTGGTTGT   | miR-34a-5p    |
| TCATCCTCGTCTCCCTCCCAG    | miR-5196-3p   |
| GTGAGTCTCTAAGAAAAGAGGA   | miR-627       |
| TGTCACTCGGCTCGGCCACTAC   | miR-668       |
| ACTGGACTTGGAGTCAGGA      | miR-378e      |
| GGGGCTGGGCGCGCGCC        | miR-4492      |
| TCCTTCTGCTCCGTCCCCCAG    | miR-1237-3p   |
| CCAGTCCTGTGCCTGCCGCCT    | miR-1910      |
| TGAGGATGGATAGCAAGGAAGCC  | miR-3605-5p   |
| AGCTGGTGTGTGAATCAGGCCG   | miR-138-5p    |
| TATGTCTGCTGACCATCACCTT   | miR-654-3p    |
| GGTGCAGTGCATCTCTGGT      | miR-143-5p    |
| CTGGTACAGGCCCTGGGGACAG   | miR-150-3p    |
| GCGACCCACTCTTGGTTTCCA    | miR-551a      |
| ACCGTGGCTTTTCGATTGTTACT  | miR-132-5p    |
| CGGCCCGGGCTGCTGTTTCCCT   | miR-1538      |
| ACTCAAACCCCTCAGTGACTT    | miR-616-5p    |
| AAGGAGCTTACAATCTAGCTGGG  | miR-708-5p    |
| TCCTCTTCTCCCTCCCTCCCAG   | miR-877-3p    |
| ATATACAGGGGAGACTCTTAT    | miR-1185-1-3p |
| TAGCAGCACAGAAATATTGGC    | miR-195-5p    |
| GTTCTCCCAACGTAAGCCCAGC   | miR-629-3p    |
| AAAGACATAGGATAGAGTCACCTC | miR-641       |
| TACCCTGTAGAACCGAATTTGTG  | miR-10b-5p    |
| ACTGGACTAGGAGTCAGAAGG    | miR-378i      |
| CAGCCCTCCTCCCGACCCAAA    | miR-4687-5p   |
| ACCTTCCTCTCCATGGGTCTTT   | miR-3667-3p   |
| GAAGAACTGTTGCATTTGCCCT   | miR-4511      |
| AGAGTCGGCGACGCCGCCAGC    | miR-4785      |
| AGCTCTAGAAAGATTGTTGACC   | miR-6502-5p   |
| GCAGGAACCTTGTGAGTCTCCT   | miR-873-5p    |
| TGGCCCTGACTGAAGACCAGCAGT | miR-1291      |
| TGGAGACGCGGCCCTGTTGGAGT  | miR-139-3p    |
| AGGGGCTGGCTTTCCTCTGGTC   | miR-185-3p    |
| AGGCAGTGTAGTTAGCTGATTGC  | miR-34c-5p    |
| AGCCTGGAAGCTGGAGCCTGCAGT | miR-1254      |
| AACTAGCTCTGTGGATCCTGAC   | miR-4661-5p   |
| TCTTTGGTTATCTAGCTGTATGA  | miR-9-5p      |
| AAAACTGAGACTACTTTTGCA    | miR-548e      |
| TAATTTTATGTATAAGCTAGT    | miR-590-3p    |
| AACTGGCCTACAAAAGTCCCAGT  | miR-193a-3p   |
| CTGGGCCCGCGGGCGTGGGG     | miR-6724-5p   |
| TTTGGGATTGACGCCACATGTCT  | miR-6513-5p   |
| ATTGTCCCTCTCCCTTCCCAG    | miR-4646-3p   |
| CACAGCAAGTGTAGACAGGCA    | miR-3120-3p   |
| TCAAGAGCAATAACGAAAAATGT  | miR-335-5p    |

|                         |              |
|-------------------------|--------------|
| TGGTAGACTATGGAACGTAGG   | miR-379-5p   |
| TAGGTTATCCGTGTTGCCTTCG  | miR-154-5p   |
| CAACAAATCACAGTCTGCCATA  | miR-7-1-3p   |
| CTATACGGCCTCCTAGCTTTCC  | let-7e-3p    |
| AGGAGGAATTGGTGTGGTCTT   | miR-766-5p   |
| AGGGGGCGGGCTCCGGCG      | miR-4488     |
| TAGATAAAATATGGTACCTG    | miR-577      |
| GGCCAGCCACCAGGAGGGCTG   | miR-3194-5p  |
| AAAAGTATTTGCGGGTTTTGTC  | miR-5481     |
| TGCCTAGGCTGAGACTGCAGTG  | miR-3135a    |
| CTGTTGCCACTAACCTCAACCT  | miR-744-3p   |
| CTATACAATCTACTGTCTTTC   | let-7a-3p    |
| TCAGCACCAGGATATTGTTGGAG | miR-3065-3p  |
| CTGACTGTTGCCGTCTCCAG    | miR-943      |
| AGGGGGATGGCAGAGCAAATTT  | miR-5010-5p  |
| CCAATATTACTGTGCTGCTTTA  | miR-16-2-3p  |
| ATCAGGGCTTGTGGAATGGGAAG | miR-3127-5p  |
| ATCCACCTCTGCCACCA       | miR-1260a    |
| TGAGCTAAATGTGTGCTGGGA   | miR-610      |
| AACCATCGACCGTTGAGTGGAC  | miR-181c-3p  |
| GGAGAAATTATCCTTGGTGTGT  | miR-539-5p   |
| CATCATCGTCTCAAATGAGTCT  | miR-136-3p   |
| ATTGTCCTTGCTGTTGGAGAT   | miR-2355-3p  |
| TGACCTGGGACTCGGACAGCTG  | miR-3661     |
| GCAGCCCAGCTGAGGCCTCTG   | miR-4690-3p  |
| CCAACCTAGGTGGTCAGAGTTG  | miR-4714-3p  |
| AATCATAACAGGGACATCCAGTT | miR-487a     |
| TTAGCCAATTGTCCATCTTTAG  | miR-4662a-5p |
| TGCCGCCCTCTCGCTGCTCTAG  | miR-4632-3p  |
| CGCCCCCTCCTGCCCCACAG    | miR-4749-3p  |
| ACCTTGGCTCTAGACTGCTTACT | miR-212-5p   |
| TACGCGCAGACCACAGGATGTC  | miR-3939     |
| AAAAGTTATTGCGGTTTTGGCT  | miR-548at-5p |
| AGGGACGGGACGCGGTGCAGTG  | miR-92b-5p   |
| AGACAGTAGTTCTTGCCTGGTT  | miR-4645-3p  |
| ACCTCCTGTGTGCATGGATTA   | miR-660-3p   |
| TAGGATTACAAGTGTGGCCAC   | miR-3159     |
| TTCAGCCAGGCTAGTGCAGTCT  | miR-3157-5p  |
| TGGGCAGGGGCTTATTGTAGGAG | miR-6721-5p  |
| CAGCCCGGATCCCAGCCCACTT  | miR-3940-3p  |
| GGGCTCACATCACCCCAT      | miR-4284     |
| TGTCGTGGGGCTTGTGGCTTG   | miR-4440     |
| CATCCGTCCGTCTGTCCAC     | miR-4800-3p  |
| TTTCCCTTTCCATCCTGGCAG   | miR-5006-3p  |
| AGTGCCTGAGGGAGTAAGAGCCC | miR-550a-5p  |
| AAAAGTAATTGTGGTTTTTGC   | miR-548ay-5p |
| TTGGAGGCGTGGGTTTT       | miR-4443     |
| CAGTTATCACAGTGTGATGCT   | miR-101-5p   |
| CCAGGCTCTGCAGTGGGA      | miR-3155b    |
| AAACAAACATGGTGCACCTTCTT | miR-495-3p   |
| ATGGCATCGTCCCCTGGTGGCT  | miR-4642     |
| TCAGTTCAGGCCAACCCAGGCT  | miR-584-3p   |
| AAAAGTAATTGCGGTTTTTGC   | miR-548au-5p |
| GGGTGCGGGCCGGCGGGG      | miR-4466     |
| TTACACAGCTGGACAGAGGCA   | miR-4672     |
| CTGCCAATTCCATAGGTCACAG  | miR-192-3p   |
| AAGTGCCCCACAGTTTGAGTGC  | miR-371b-3p  |
| AGGTTACCCGAGCAACTTTGCAT | miR-409-5p   |
| TTAATTTTTTGTTCGGTCACT   | miR-4775     |

|                         |              |
|-------------------------|--------------|
| TACCCAGTCTCCGGTGCAGCC   | miR-3130-5p  |
| GCTAAGGAAGTCCTGTGCTCAG  | miR-4521     |
| TAAAGCATAAATATGGACATGT  | miR-3912     |
| CTTAGCAGGTTGTATTATCATT  | miR-374b-3p  |
| CCAGAGCAGCCTGCGGTAACAGT | miR-6501-3p  |
| CGGTAGAGAGGGCAGTGGGAGG  | miR-197-5p   |
| TCTATACAGACCCTGGCTTTTC  | miR-1284     |
| AGAGCTGGCTGAAGGGCAG     | miR-4487     |
| TCGGCTGACCACCCACCCAC    | miR-1234-3p  |
| TGTGACAGATTGATAACTGAAA  | miR-542-3p   |
| TAAGGTGCATCTAGTGCAGTTAG | miR-18b-5p   |
| TGAGTATTACATGGCCAATCTC  | miR-496      |
| GAGCCAGTGGTGAGACAGTGA   | miR-4676-5p  |
| TTTCTTCTTAGACATGGCAACG  | miR-4659a-3p |
| AGACCCTGGTCTGCACTCTATC  | miR-504      |
| ACGGTGCTGGATGTGGCCTTT   | miR-1250     |
| TCGTGTCTTGTGTGCAGCCGG   | miR-187-3p   |
| TGAGGCGGGGGGCGAGC       | miR-6087     |
| TGAGGCTCTGTTAGCCTTGGCTC | miR-2467-5p  |
| GATATCAGCTCAGTAGGCACCG  | miR-3074-3p  |
| CCAGTTACCGCTTCCGCTACCGC | miR-935      |
| TTTGGGACTGATCTTGATGTCT  | miR-3913-5p  |
| CTCGGGCGGAGGTGGTTGAGTG  | miR-4750-5p  |
| CCTCCCATGCCAAGAACTCCC   | miR-2116-3p  |
| TAGGGGCAGCAGAGGACCTGGG  | miR-4688     |
| CCAGGCTCTGCAGTGGGAACT   | miR-3155a    |
| TATAAAATGAGGGCAGTAAGAC  | miR-3163     |
| TGAGGATATGGCAGGGAAGGGGA | miR-3679-5p  |
| TGGACGGAGAAGTATAAGGGT   | miR-184      |
| AAAGCTGGGTTGAGAAGG      | miR-320e     |
| CTTCCTCGTCTGTCTGCCCC    | miR-1238-3p  |
| TCTGGCTCCGTGTCTTCACTCCC | miR-149-5p   |
| AGGATGAGCAAAGAAAGTAGATT | miR-1255a    |
| ATAGGACTCATATAGTGCCAG   | miR-3117-3p  |
| TAGGTAGTTTCATGTTGTTGGG  | miR-196a-5p  |
| CACTGTGGGTACATGCT       | miR-4318     |
| TTTGAGGCTACAGTGAGATGTG  | miR-1304-5p  |
| CTAGGTATGGTCCCAGGGATCC  | miR-331-5p   |
| AGGGACTTTCAGGGGCAGCTGT  | miR-365b-5p  |
| AGGAGATCCTGGGTT         | miR-3676-5p  |
| TCAACAAAATCACTGATGCTGGA | miR-3065-5p  |
| TCTCTTCATCTACCCCCAG     | miR-6515-3p  |
| TAGTGAGTTAGAGATGCAGAGCC | miR-3174     |
| CTCGTGGGCTCTGGCCACGGCC  | miR-3677-3p  |
| CAAGCTCGCTTCTATGGGTCTG  | miR-99a-3p   |
| TTATTGTCACGTTCTGATT     | miR-5701     |
| ATCCGCGCTCTGACTCTCTGCC  | miR-937-3p   |
| CGTCCCACCCCCACTCCTGT    | miR-4433-5p  |
| CCCCGGGAGCCCCGGCG       | miR-4532     |
| TTTCTATTTCTCAGTGGGGCTC  | miR-4482-3p  |
| TAAAGAGCCCTGTGGAGACA    | miR-1276     |
| TACTTTTCTAGGTTGTTGGGG   | miR-5003-3p  |

1917-1658 = 259 miRNAs

Selected from XX samples X 530 miRNAs

Instances/ave top 30 miRNAs

B\_33vC\_2

259 miRs

XX samples



0.90

sum <> "" =

C1102 samples included

XX UCs, XX CHR-NPs, XX CHR-Ps

counts shown are exact matches + inclusions

each miR ranked by total reads

259 mature miRNAs:

|                          | ID          |
|--------------------------|-------------|
| TATTGCACTTGTCCCGCCTGT    | miR-92a-3p  |
| CAACGGAATCCCCAAAAGCAGCTG | miR-191-5p  |
| TCTCCCAACCCCTGTACCAGTG   | miR-150-5p  |
| TGAGGTAGTAGGTTGTATAGTT   | let-7a-5p   |
| AACATTCAACGCTGTCGGTGAGT  | miR-181a-5p |
| TAGCAGCACGTAAATATTGGCG   | miR-16-5p   |
| TTCAAGTAATCCAGGATAGGCT   | miR-26a-5p  |
| AAACCGTTACCATTACTGAGTT   | miR-451a    |
| AAGCTGCCAGTTGAAGAACTGT   | miR-22-3p   |
| CATTGCACTTGTCTCGGTCTGA   | miR-25-3p   |
| TGAGGTAGTAGTTTGTGCTGTT   | let-7i-5p   |
| TGTAAACATCCCCGACTGGAAG   | miR-30d-5p  |
| TGAGGTAGTAGTTTGTACAGTT   | let-7g-5p   |
| TGAGGTAGTAGGTTGTGTGGTT   | let-7b-5p   |
| TGAGGTAGTAGATTGTATAGTT   | let-7f-5p   |
| AGCTCGGTCTGAGGCCCTCAGT   | miR-423-3p  |
| TTCAAGTAATTCAGGATAGGT    | miR-26b-5p  |
| AGCAGCATTGTACAGGGCTATGA  | miR-103a-3p |
| CAAAGAATTCTCCTTTTGGGCT   | miR-186-5p  |
| CACTAGATTGTGAGCTCCTGGA   | miR-28-3p   |
| ACTGGACTTGGAGTCAGAAGG    | miR-378a-3p |
| CAAAGTGCTGTTCTGTCAGGTAG  | miR-93-5p   |
| TCAGTGCACACTACAGAACTTTGT | miR-148a-3p |
| TGTCAGTTTGTCAAATACCCCA   | miR-223-3p  |
| TGAGAACTGAATTCATAGGCT    | miR-146b-5p |
| TACCACAGGGTAGAACCACGG    | miR-140-3p  |
| AAAAGCTGGGTTGAGAGGGCGA   | miR-320a    |
| TTTGGAATGGTAGAACTCACACT  | miR-182-5p  |
| TCGAGGAGCTCACAGTCT       | miR-151b    |
| TCAGTGCATCACAGAACTTTGT   | miR-148b-3p |
| TGTAAACATCCTACACTCTCAGC  | miR-30c-5p  |
| AGAGGTAGTAGGTTGCATAGTT   | let-7d-5p   |
| TGTAAACATCCTTGACTGGAAG   | miR-30e-5p  |
| TAGCTTATCAGACTGATGTTGA   | miR-21-5p   |
| TCGAGGAGCTCACAGTCTAGT    | miR-151a-5p |
| TAGCAGCACATCATGGTTTACA   | miR-15b-5p  |
| CTAGACTGAAGCTCCTTGAGG    | miR-151a-3p |
| TGAGAACTGAATTCATGGGTT    | miR-146a-5p |
| CACCCGGCTGTGTGCACATGTGC  | miR-941     |
| TGAGGGGCAGAGAGCGAGACTTT  | miR-423-5p  |
| TTCAACACCTTCTCCACCCAGC   | miR-197-3p  |
| AACATTCAATTGCTGTCGGTGGGT | miR-181b-5p |
| TCAGGCTCAGTCCCCTCCCGAT   | miR-484     |
| CTGACCTATGAATTGACAGCC    | miR-192-5p  |
| TCTCACACAGAAATCGCACCCCGT | miR-342-3p  |
| AGCTACATCTGGCTACTGGGT    | miR-222-3p  |
| TTACAGTGGCTAAGTTCTGC     | miR-27b-3p  |
| TCTCTCGGCTCCTCGGGCTC     | miR-3615    |
| GGATATCATATATACTGTAAG    | miR-144-5p  |
| TGAGATGAAGCACTGTAGCTC    | miR-143-3p  |
| TCGGATCCGCTCTGAGCTTGGCT  | miR-127-3p  |
| ATCACATTGCCAGGGATTTCC    | miR-23a-3p  |

|                          |               |
|--------------------------|---------------|
| AATGGGCGCCACTAGGGTTGTG   | miR-652-3p    |
| CTTTCAGTCGGATGTTTACAGC   | miR-30e-3p    |
| CAACACCAGTCGATGGGCTGT    | miR-21-3p     |
| TACAGTACTGTGATAACTGAA    | miR-101-3p    |
| AATGACACGATCACTCCCGTTGA  | miR-425-5p    |
| AACATTCAACCTGTCGGTGAGT   | miR-181c-5p   |
| TTAATGCTAATCGTGATAGGGT   | miR-155-5p    |
| TCCTTGAGACCCTTTAACCTGTGA | miR-125a-5p   |
| AGCTACATTGTCTGCTGGGTTTC  | miR-221-3p    |
| TGAGACCTCTGGGTCTGAGCT    | miR-769-5p    |
| CATTATTACTTTTGGTACGCG    | miR-126-5p    |
| CATAAAGTAGAAAGCACTACT    | miR-142-5p    |
| GCCCTGACCTGTCTGTTCTG     | miR-4732-3p   |
| CAAAGTGCTTACAGTGCAGGTAG  | miR-17-5p     |
| TGTAACATCCTTACACTCAGCT   | miR-30b-5p    |
| TAAAGTGCTTATAGTGCAGGTAG  | miR-20a-5p    |
| TGGCTCAGTTCAGCAGGAACAG   | miR-24-3p     |
| TATGGCACTGGTAGAATTCACT   | miR-183-5p    |
| CTATACGACCTGTGCCTTTCT    | let-7d-3p     |
| CGGGGCAGCTCAGTACAGGAT    | miR-486-3p    |
| TGAGGTAGTAAGTTGTATTGTT   | miR-98-5p     |
| CATGCCTTGAGTGTAGGACCGT   | miR-532-5p    |
| TAGCACCATCTGAAATCGGTTA   | miR-29a-3p    |
| GAATGTTGCTCGGTGAACCCCT   | miR-409-3p    |
| ATGCACCTGGGCAAGGATTCTG   | miR-500a-3p   |
| CACCCGTAGAACCACCTTGCG    | miR-99b-5p    |
| TGCGGGCTAGGGCTAACAGCA    | miR-744-5p    |
| ATCACATTGCCAGGGATTACC    | miR-23b-3p    |
| AATTGCACGGTATCCATCTGTA   | miR-363-3p    |
| ACTCGGCGTGGCGTTCGGTTCGTG | miR-1307-3p   |
| TATTGCACTCGTCCCGCCTCC    | miR-92b-3p    |
| TTATAAAGCAATGAGACTGATT   | miR-340-5p    |
| TTACAGTGGCTAAGTTCCGC     | miR-27a-3p    |
| CCTCTGGGCCCTTCCCTCCAG    | miR-326       |
| CTGGCCCTCTCTGCCCTTCCGT   | miR-328       |
| TCGTACCGTGAGTAATAATGCG   | miR-126-3p    |
| TCACAGTGAACCGGTCTCTTT    | miR-128       |
| TGAGGTAGGAGGTTGTATAGTT   | let-7e-5p     |
| ACCACTGACCGTTGACTGTACC   | miR-181a-2-3p |
| TACAGTATAGATGATGTACT     | miR-144-3p    |
| GCTGACTCCTAGTCCAGGGCTC   | miR-345-5p    |
| CAGTGCAATGTTAAAAGGGCAT   | miR-130a-3p   |
| TAGCAGCACATAATGGTTTTGTG  | miR-15a-5p    |
| AAGGAGCTCACAGTCTATTGAG   | miR-28-5p     |
| TCCGGTTCTCAGGGCTCCACC    | miR-671-3p    |
| CCGCACTGTGGTACTTGCTGC    | miR-106b-3p   |
| TGCCCTGTGGACTCAGTTCTGG   | miR-146b-3p   |
| TAGTGCAATATTGCTTATAGGGT  | miR-454-3p    |
| GCCCCTGGGCCTATCCTAGAA    | miR-331-3p    |
| CAGTGCAATGATGAAAGGGCAT   | miR-130b-3p   |
| AGGGGTGCTATCTGTGATTGA    | miR-342-5p    |
| TACCCTGTAGATCCGAATTTGTG  | miR-10a-5p    |
| TGTAACAGCAACTCCATGTGGA   | miR-194-5p    |
| TACCCATTGCATATCGGAGTTG   | miR-660-5p    |
| ACCCCACTCCTGGTACC        | miR-4286      |
| TTATCAGAATCTCCAGGGTAC    | miR-361-5p    |
| TAAAGTGCTGACAGTGCAGAT    | miR-106b-5p   |
| TGGAGAGAAAGGCAGTTCCTGA   | miR-185-5p    |
| ACCATCGACCGTTGATTGTACC   | miR-181a-3p   |

|                           |             |
|---------------------------|-------------|
| TCCCCAGGTGTGATTCTGATTT    | miR-361-3p  |
| GTCCAGTTTTCCAGGAATCCCT    | miR-145-5p  |
| CAAAGTGCTCATAGTGCAGGTAG   | miR-20b-5p  |
| AGGCAAGATGCTGGCATAGCT     | miR-31-5p   |
| TGAGGTAGTAGGTTGTATGGTT    | let-7c      |
| TGTAACATCCTCGACTGGAAG     | miR-30a-5p  |
| ACAGTAGTCTGCACATTGGTTA    | miR-199a-3p |
| ACAGTAGTCTGCACATTGGTTA    | miR-199b-3p |
| TATTCATTTATCCCCAGCCTACA   | miR-664a-3p |
| ACTGCCCCAGGTGCTGCTGG      | miR-324-3p  |
| TAACAGTCTACAGCCATGGTCCG   | miR-132-3p  |
| AATATAACACAGATGGCCTGT     | miR-410     |
| AAAGTTCTGAGACACTCCGACT    | miR-148a-5p |
| TGTAGTGTTCCTACTTTATGGA    | miR-142-3p  |
| ACTCTTCCCTGTTGCACTAC      | miR-130b-5p |
| CTGCCCTGGCCCCGAGGGACCGA   | miR-874     |
| TGAGCGCCTCGACGACAGAGCCG   | miR-339-3p  |
| ACTCCAGCCCCACAGCCTCAGC    | miR-766-3p  |
| TGGGTCTTTGCGGGCGAGATGA    | miR-193a-5p |
| AATGCACCCGGGCAAGGATTCT    | miR-501-3p  |
| CCTGTTCTCCATTACTTGGCTC    | miR-26b-3p  |
| CCCAGTGTTTCCAGACTACCTGTTT | miR-199a-5p |
| CACGCTCATGCACACACCACA     | miR-574-3p  |
| TCGACCGGACCTCGACCGGCT     | miR-1307-5p |
| AACATTCATTGTTGTCGGTGGGT   | miR-181d    |
| TGGGTTTACGTTGGGAGAACT     | miR-629-5p  |
| CTGTGCGTGTGACAGCGGCTGA    | miR-210     |
| AAGTTCTGTTTATACACTCAGGC   | miR-148b-5p |
| ATCGGGAATGTCGTGTCGGCCC    | miR-425-3p  |
| TGAGAACCACGTCTGCTCTGAG    | miR-589-5p  |
| ACTGCTGAGCTAGCACTTCCCG    | miR-93-3p   |
| GTAGAGGAGATGGCGCAGGG      | miR-877-5p  |
| TCCGTCTCAGTTACTTTATAGC    | miR-340-3p  |
| TGTGCAAATCCATGCAAACTGA    | miR-19b-3p  |
| TTTCCGGCTCGCGTGGGTGTGT    | miR-1180    |
| CAAAACGTGAGGCGCTGCTAT     | miR-424-3p  |
| ATCAACAGACATTAATTGGGCGC   | miR-421     |
| TCTTCTCTGTTTTGGCCATGTG    | miR-942     |
| CCTCCCACACCCAAGGCTTGCA    | miR-532-3p  |
| CGTGATTTTGACAAGCTGAGTT    | miR-223-5p  |
| AAAAGTGCTTACAGTGCAGGTAG   | miR-106a-5p |
| TATACAAGGGCAAGCTCTCTGT    | miR-381-3p  |
| TGTCCTCTAGGGCCTGCAGTCT    | miR-3909    |
| ACTGTAAACGCTTCTGATG       | miR-3607-3p |
| TTTTGTGTCTCCCATCCCCAG     | miR-5010-3p |
| AATCCTTGAACCTAGGTGTGAGT   | miR-362-5p  |
| TCTACAGTGCACGTGTCTCCAGT   | miR-139-5p  |
| TCCCTGTCTCCAGGAGCTCACG    | miR-339-5p  |
| GGCGGGTGCGGGGGTGG         | miR-3656    |
| CAGTGCAATAGTATTGTCAAAGC   | miR-301a-3p |
| CGTCAACACTTGCTGGTTTCCT    | miR-505-3p  |
| TTGGGAAACGGCCGCTGAGTG     | miR-2110    |
| CAGTGGTTTTACCCTATGGTAG    | miR-140-5p  |
| TCCAGCATCAGTGATTTTGTTG    | miR-338-3p  |
| CCTCCTGCCCTCCTTGCTGT      | miR-1976    |
| TAACTACTGCCGGTAATGATGGA   | miR-200c-3p |
| AATGGATTTTTGGAGCAGG       | miR-1246    |
| TAGCACCATTTGAAATCGGTTA    | miR-29c-3p  |
| CACCTTGCGCTACTCAGGTCTG    | miR-3200-3p |

|                          |               |
|--------------------------|---------------|
| AAACTCTACTTGTCTTCTGAGT   | miR-618       |
| TAGGTAGTTTTCCCTGTTGTTGGG | miR-196b-5p   |
| CTCCGTTTGCCTGTTTCGCTG    | miR-1468      |
| TCTAGTAAGAGTGGCAGTCGA    | miR-628-3p    |
| CCCAGTGTTTAGACTATCTGTTC  | miR-199b-5p   |
| ACGCCCTTCCCCCCTTCTTCA    | miR-1249      |
| TGTGACTGGTTGACCAGAGGGG   | miR-134       |
| TCAGTGCATGACAGAACTTGG    | miR-152       |
| CTCCTGACTCCAGGTCCTGTGT   | miR-378a-5p   |
| GTCATACACGGCTCTCCTCTCT   | miR-485-3p    |
| TGTTCTCTGTCTCCAGAC       | miR-4326      |
| AAAAGTACTTGCGGATTT       | miR-548av-5p  |
| TCTTGGAGTAGGTCATTGGGTGG  | miR-432-5p    |
| ATTCTAATTTCTCCACGTCTTT   | miR-576-5p    |
| CAGGGCTGGCAGTGACATGGGT   | miR-4446-3p   |
| AGGCGGAGACTTGGGCAATTG    | miR-25-5p     |
| AAAAGTACTTGCGGATTTTGCT   | miR-548k      |
| TTGTACATGGTAGGCTTTCATT   | miR-493-5p    |
| AGGGGAAAGTTCTATAGTCC     | miR-625-5p    |
| ACCTGGCATAACAATGTAGATTT  | miR-221-5p    |
| GAGTTCTACAGTCAGAC        | miR-3168      |
| ATATAATACAACCTGCTAAGTG   | miR-374b-5p   |
| AGCAGCATTGTACAGGGCTATCA  | miR-107       |
| CCTCCGTGTTACCTGTCTCTAG   | miR-3605-3p   |
| TTATGGTTTGCCTGGGACTGAG   | miR-584-5p    |
| TCCCTGAGACCCTAACTTGTGA   | miR-125b-5p   |
| TAACTGGTTGAACAACCTGAACC  | miR-582-3p    |
| AAGGGCTTCCCTCTCTGCAGGAC  | miR-3158-3p   |
| CGCATCCCCCTAGGGCATTGGTGT | miR-324-5p    |
| ACTGGCCTGGGACTACCGG      | miR-3176      |
| GGGGTTCCTGGGGATGGGATTT   | miR-23a-5p    |
| CAAGTCACTAGTGGTTCCGTT    | miR-224-5p    |
| TGAGTGTGTGTGTGTGAGTGTGT  | miR-574-5p    |
| TGAGGAGATCGTCGAGGTTGG    | miR-3150b-3p  |
| TAAGGTGCATCTAGTGCAGATAG  | miR-18a-5p    |
| GCCTGCTGGGGTGGAACTGGT    | miR-370       |
| AGTGCCTGAGGGAGTAAGAG     | miR-550a-3-5p |
| TCAGAACAATGCCGGTCCCAGA   | miR-589-3p    |
| TTTGGTCCCCTTCAACCAGCTG   | miR-133a      |
| TGTAGAGCAGGGAGCAGGAAGCT  | miR-4732-5p   |
| CAGCCCCACAGCCTCAGA       | miR-4323      |
| ACTCAAAGATGGCGGCACTTT    | miR-371b-5p   |
| TAGTAGACCGTATAGCGTACG    | miR-411-5p    |
| CCTCACCATCCCTTCTGCCTGC   | miR-6511a-3p  |
| TCTGGGCAACAAAGTGAGACCT   | miR-1285-3p   |
| CTGGGAGAGGGTTGTTTACTCC   | miR-30c-1-3p  |
| TCTCTGGGCCTGTGTCTTAGGC   | miR-330-5p    |
| AGGGCTTAGCTGCTTGTGAGCA   | miR-27a-5p    |
| TGATATGTTTGATATATTAGGT   | miR-190a      |
| TCAGCTACTACCTCTATTAGG    | miR-5690      |
| AACCCGTAGATCCGAACTTGTG   | miR-100-5p    |
| ACTGCCCTAAGTGCTCCTTCTGG  | miR-18a-3p    |
| CTGTACAGGCCACTGCCTTGC    | let-7g-3p     |
| AATCCTTTGTCCCTGGGTGAGA   | miR-501-5p    |
| TGTCTTGCAGGCCGTCATGCA    | miR-431-5p    |
| AGGTTGGGATCGGTTGCAATGCT  | miR-92a-1-5p  |
| AAAAGCTGGGTTGAGAGGGCAA   | miR-320b      |
| GGGAGAAGGGTCGGGGC        | miR-4516      |
| TTGCAGCTGCCTGGGAGTACTTC  | miR-1301      |

AATCCTTGCTACCTGGGT  
TTTTTCATTATTGCTCCTGACC  
CCGGTCCCAGGAGAACCTGCAGA  
TTATAATACAACCTGATAAGTG  
TTAGGGCCCTGGCTCCATCTCC  
ACTGCAGTGAAGGCACTTGTAG  
AGGGCCCCCCTCAATCCTGT  
AACTGGCCCTCAAAGTCCCGCT  
TTACAGTTGTTCAACCAGTTACT  
TGCCTACTGAGCTGAAACACAG  
TGTCTTACTCCCTCAGGCACAT  
GAAGTTGTTTCGTGGTGGATTCCG  
CTGCGCAAGCTACTGCCTTGCT  
CGAATCATTATTTGCTGCTCTA  
TAATGCCCCTAAAAATCCTTAT  
TAATGCCCCTAAAAATCCTTAT  
ATCATGATGGGCTCCTCGGTGT  
CGTGCCACCCTTTTCCCAG  
AATGCACCTGGGCAAGGATTCA  
AATCGTACAGGGTCATCCACTT  
TAATACTGCCTGGTAATGATGA  
TCGGGGATCATCATGTCACGAGA  
TGATATGTTTGATATTGGGT  
AATCTGAGAAGGCGCACAAAGT  
CGGGCGTGGTGGTGGGG  
CATCAGAATTCATGGAGGCTAG  
ACCTGGACCCAGCGTAGACAAAG  
GACTATAGAACTTTCCCCTCA  
TAATCCTTGCTACCTGGGTGAGA  
TGTGCAAATCTATGCAAACTGA

miR-500b  
miR-335-3p  
miR-4746-5p  
miR-374a-5p  
miR-1296  
miR-17-3p  
miR-296-5p  
miR-193b-3p  
miR-582-5p  
miR-24-2-5p  
miR-550a-3p  
miR-382-5p  
let-7i-3p  
miR-15b-3p  
miR-365a-3p  
miR-365b-3p  
miR-433  
miR-1227-3p  
miR-502-3p  
miR-487b  
miR-200b-3p  
miR-542-5p  
miR-190b  
miR-3200-5p  
miR-1268a  
miR-2115-3p  
miR-3690  
miR-625-3p  
miR-500a-5p  
miR-19a-3p

2071-1935 = 136 miRs with at least 10000 reads total over 9

Selected 98 samples X 136 miRNAs

correlation B\_33 v C\_2

-0.12

2071-1935 = 136 miRs

|            |
|------------|
| 136 miRs   |
| XX samples |

ALL SELECTED

FROZEN

TOP 136

z-scores with aveUC, sdUC used

sum <> "" =

counts shown are exact matches + inclusions

each miR ranked by total reads

2071

use 136 miRNAs:

ID

TATTGCACTTGTCCCGCCTGT

miR-92a-3p

CAACGGAATCCAAAAGCAGCTG

miR-191-5p

TCTCCCAACCCCTGTACCAGTG

miR-150-5p

TGAGGTAGTAGGTTGTATAGTT

let-7a-5p

AACATTCAACGCTGTCGGTGAGT

miR-181a-5p

TAGCAGCACGTAATATTGGCG

miR-16-5p

TTCAAGTAATCCAGGATAGGCT

miR-26a-5p

AAACCGTTACCATTACTGAGTT

miR-451a

|                          |             |
|--------------------------|-------------|
| AAGCTGCCAGTTGAAGAAGTGT   | miR-22-3p   |
| CATTGCACTTGTCTCGGTCTGA   | miR-25-3p   |
| TGAGGTAGTAGTTTGTGCTGTT   | let-7i-5p   |
| TGTAACATCCCCGACTGGAAG    | miR-30d-5p  |
| TGAGGTAGTAGTTTGTACAGTT   | let-7g-5p   |
| TGAGGTAGTAGTTTGTGTGGTT   | let-7b-5p   |
| TGAGGTAGTAGATTGTATAGTT   | let-7f-5p   |
| AGCTCGGTCTGAGGCCCTCAGT   | miR-423-3p  |
| TTCAAGTAATTCAGGATAGGT    | miR-26b-5p  |
| AGCAGCATTGTACAGGGCTATGA  | miR-103a-3p |
| CAAAGAATTCTCCTTTTGGGCT   | miR-186-5p  |
| CACTAGATTGTGAGCTCCTGGA   | miR-28-3p   |
| ACTGGACTTGGAGTCAGAAGG    | miR-378a-3p |
| CAAAGTGCTGTTTCGTGCAGGTAG | miR-93-5p   |
| TCAGTGCCTACAGAAGTTTGT    | miR-148a-3p |
| TGTCAGTTTGTCAAATACCCCA   | miR-223-3p  |
| TGAGAACTGAATTCATAGGCT    | miR-146b-5p |
| TACCACAGGGTAGAACCACGG    | miR-140-3p  |
| AAAAGCTGGGTTGAGAGGGCGA   | miR-320a    |
| TTTGGCAATGGTAGAACTCACACT | miR-182-5p  |
| TCGAGGAGCTCACAGTCT       | miR-151b    |
| TCAGTGCATCACAGAAGTTTGT   | miR-148b-3p |
| TGTAACATCCTACACTCTCAGC   | miR-30c-5p  |
| AGAGGTAGTAGGTTGCATAGTT   | let-7d-5p   |
| TGTAACATCCTTGACTGGAAG    | miR-30e-5p  |
| TAGCTTATCAGACTGATGTTGA   | miR-21-5p   |
| TCGAGGAGCTCACAGTCTAGT    | miR-151a-5p |
| TAGCAGCACATCATGGTTTACA   | miR-15b-5p  |
| CTAGACTGAAGCTCCTTGAGG    | miR-151a-3p |
| TGAGAACTGAATTCATGGGTT    | miR-146a-5p |
| CACCCGGCTGTGTGCACATGTGC  | miR-941     |
| TGAGGGGCAGAGAGCGAGACTTT  | miR-423-5p  |
| TTACCACCTTCTCCACCCAGC    | miR-197-3p  |
| AACATTCATTGCTGTCGGTGGGT  | miR-181b-5p |
| TCAGGCTCAGTCCCCTCCCGAT   | miR-484     |
| CTGACCTATGAATTGACAGCC    | miR-192-5p  |
| TCTCACACAGAAATCGCACCCGT  | miR-342-3p  |
| AGCTACATCTGGCTACTGGGT    | miR-222-3p  |
| TTCACAGTGGCTAAGTTCTGC    | miR-27b-3p  |
| TCTCTCGGCTCCTCGGGCTC     | miR-3615    |
| GGATATCATCATATACTGTAAG   | miR-144-5p  |
| TGAGATGAAGCACTGTAGCTC    | miR-143-3p  |
| TCGGATCCGTCTGAGCTTGGCT   | miR-127-3p  |
| ATCACATTGCCAGGGATTTCC    | miR-23a-3p  |
| AATGGGCCCACTAGGGTTGTG    | miR-652-3p  |
| CTTTCAGTCGGATGTTTACAGC   | miR-30e-3p  |
| CAACACCAGTCGATGGGCTGT    | miR-21-3p   |

|                          |               |
|--------------------------|---------------|
| TACAGTACTGTGATAACTGAA    | miR-101-3p    |
| AATGACACGATCACTCCCGTTGA  | miR-425-5p    |
| AACATTCAACCTGTCCGGTGAGT  | miR-181c-5p   |
| TTAATGCTAATCGTGATAGGGGT  | miR-155-5p    |
| TCCCTGAGACCCTTTAACCTGTGA | miR-125a-5p   |
| AGCTACATTGTCTGCTGGGTTTC  | miR-221-3p    |
| TGAGACCTCTGGGTTCTGAGCT   | miR-769-5p    |
| CATTATTACTTTTGGTACGCG    | miR-126-5p    |
| CATAAAGTAGAAAGCACTACT    | miR-142-5p    |
| GCCCTGACCTGTCCTGTTCTG    | miR-4732-3p   |
| CAAAGTGCTTACAGTGCAGGTAG  | miR-17-5p     |
| TGTAACATCCTACACTCAGCT    | miR-30b-5p    |
| TAAAGTGCTTATAGTGCAGGTAG  | miR-20a-5p    |
| TGGCTCAGTTCAGCAGGAACAG   | miR-24-3p     |
| TATGGCACTGGTAGAATTCACT   | miR-183-5p    |
| CTATACGACCTGCTGCCTTTCT   | let-7d-3p     |
| CGGGCAGCTCAGTACAGGAT     | miR-486-3p    |
| TGAGGTAGTAAGTTGTATTGTT   | miR-98-5p     |
| CATGCCCTTGAGTGTAGGACCGT  | miR-532-5p    |
| TAGCACCATCTGAAATCGGTTA   | miR-29a-3p    |
| GAATGTTGCTCGGTGAACCCCT   | miR-409-3p    |
| ATGCACCTGGGCAAGGATTCTG   | miR-500a-3p   |
| CACCCGTAGAACCGACCTTGCG   | miR-99b-5p    |
| TGCGGGGCTAGGGCTAACAGCA   | miR-744-5p    |
| ATCACATTGCCAGGGATTACC    | miR-23b-3p    |
| AATTGCACGGTATCCATCTGTA   | miR-363-3p    |
| ACTCGGCGTGGCGTCGGTCGTG   | miR-1307-3p   |
| TATTGCACTCGTCCCGCCTCC    | miR-92b-3p    |
| TTATAAAGCAATGAGACTGATT   | miR-340-5p    |
| TTACAGTGGCTAAGTTCCGC     | miR-27a-3p    |
| CCTCTGGGCCCTTCTCCAG      | miR-326       |
| CTGGCCCTCTCTGCCCTTCCGT   | miR-328       |
| TCGTACCGTGAGTAATAATGCG   | miR-126-3p    |
| TCACAGTGAACCGGTCTCTTT    | miR-128       |
| TGAGGTAGGAGTTGTATAGTT    | let-7e-5p     |
| ACCACTGACCGTTGACTGTACC   | miR-181a-2-3p |
| TACAGTATAGATGATGTACT     | miR-144-3p    |
| GCTGACTCCTAGTCCAGGGCTC   | miR-345-5p    |
| CAGTGCAATGTTAAAAGGGCAT   | miR-130a-3p   |
| TAGCAGCACATAATGGTTTGTG   | miR-15a-5p    |
| AAGGAGCTCACAGTCTATTGAG   | miR-28-5p     |
| TCCGGTTCTCAGGGCTCCACC    | miR-671-3p    |
| CCGCACTGTGGGTACTTGCTGC   | miR-106b-3p   |
| TGCCCTGTGGACTCAGTTCTGG   | miR-146b-3p   |
| TAGTGCAATATTGCTTATAGGGT  | miR-454-3p    |
| GCCCCTGGGCCATCCTAGAA     | miR-331-3p    |
| CAGTGCAATGATGAAAGGGCAT   | miR-130b-3p   |
| AGGGGTGCTATCTGTGATTGA    | miR-342-5p    |

TACCCTGTAGATCCGAATTTGTG  
 TGTAACAGCAACTCCATGTGGA  
 TACCATTGCATATCGGAGTTG  
 ACCCCACTCCTGGTACC  
 TTATCAGAATCTCCAGGGGTAC  
 TAAAGTGCTGACAGTGCAGAT  
 TGGAGAGAAAGGCAGTTCCTGA  
 ACCATCGACCGTTGATTGTACC  
 TCCCCAGGTGTGATTCTGATTT  
 GTCCAGTTTTCCAGGAATCCCT  
 CAAAGTGCTCATAGTGCAGGTAG  
 AGGCAAGATGCTGGCATAGCT  
 TGAGGTAGTAGGTTGTATGGTT  
 TGTAACATCCTCGACTGGAAG  
 ACAGTAGTCTGCACATTGGTTA  
 ACAGTAGTCTGCACATTGGTTA  
 TATTCATTTATCCCCAGCCTACA  
 ACTGCCCCAGGTGCTGCTGG  
 TAACAGTCTACAGCCATGGTCG  
 AATATAACACAGATGGCCTGT  
 AAAGTTCTGAGACACTCCGACT  
 TGTAGTGTTCCTACTTTATGGA  
 ACTCTTTCCCTGTTGCACTAC  
 CTGCCCTGGCCCGAGGGACCGA  
 TGAGCGCCTCGACGACAGAGCCG  
 ACTCCAGCCCCACAGCCTCAGC  
 TGGGTCTTTGCGGGCGAGATGA  
 AATGCACCCGGGCAAGGATTCT  
 CCTGTTCTCCATTACTTGGCTC  
 CCCAGTGTTTCCAGACTACCTGTTC  
 CACGCTCATGCACACCCACA  
 TCGACCGGACCTCGACCGGCT  
 AACATTCATTGTTGTCGGTGGGT

miR-10a-5p  
 miR-194-5p  
 miR-660-5p  
 miR-4286  
 miR-361-5p  
 miR-106b-5p  
 miR-185-5p  
 miR-181a-3p  
 miR-361-3p  
 miR-145-5p  
 miR-20b-5p  
 miR-31-5p  
 let-7c  
 miR-30a-5p  
 miR-199a-3p  
 miR-199b-3p  
 miR-664a-3p  
 miR-324-3p  
 miR-132-3p  
 miR-410  
 miR-148a-5p  
 miR-142-3p  
 miR-130b-5p  
 miR-874  
 miR-339-3p  
 miR-766-3p  
 miR-193a-5p  
 miR-501-3p  
 miR-26b-3p  
 miR-199a-5p  
 miR-574-3p  
 miR-1307-5p  
 miR-181d

Selected XX samples X 136 miRNAs  
 TRANSPOSE OF TOP 136

136 miRs (6 in red)  
 95 samples

z-scores with aveUC, sdUC used 0  
 sum <> "" = 0  
 97 index type:  
 0 1  
 0 2  
 0 3  
 0 4  
 0 6  
 0 7  
 0 8  
 0 9  
 0 10  
 0 11  
 0 12  
 0 13  
 0 14  
 0 15  
 0 17  
 0 18  
 0 19  
 0 20  
 0 21  
 0 22



|   |    |
|---|----|
| 0 | 23 |
| 0 | 24 |
| 0 | 25 |
| 0 | 26 |
| 0 | 27 |
| 0 | 28 |
| 0 | 29 |
| 0 | 1  |
| 0 | 2  |
| 0 | 3  |
| 0 | 4  |
| 0 | 5  |
| 0 | 6  |
| 0 | 7  |
| 0 | 8  |
| 0 | 9  |
| 0 | 10 |
| 0 | 11 |
| 0 | 12 |
| 0 | 13 |
| 0 | 14 |
| 0 | 15 |
| 0 | 16 |
| 0 | 17 |
| 0 | 18 |
| 0 | 19 |
| 0 | 20 |
| 0 | 21 |
| 0 | 22 |
| 0 | 23 |
| 0 | 24 |
| 0 | 25 |
| 0 | 26 |
| 0 | 27 |
| 0 | 28 |
| 0 | 29 |
| 0 | 30 |
| 0 | 31 |
| 0 | 32 |
| 0 | 33 |
| 0 | 34 |
| 0 | 35 |
| 0 | 36 |
| 0 | 37 |
| 0 | 38 |
| 0 | 1  |
| 0 | 2  |
| 0 | 3  |
| 0 | 4  |
| 0 | 5  |
| 0 | 6  |
| 0 | 8  |
| 0 | 9  |
| 0 | 10 |
| 0 | 11 |
| 0 | 12 |
| 0 | 13 |
| 0 | 14 |
| 0 | 15 |

|   |    |
|---|----|
| 0 | 16 |
| 0 | 17 |
| 0 | 18 |
| 0 | 19 |
| 0 | 20 |
| 0 | 21 |
| 0 | 22 |
| 0 | 23 |
| 0 | 24 |
| 0 | 25 |
| 0 | 26 |
| 0 | 27 |
| 0 | 28 |
| 0 | 29 |
| 0 | 30 |
| 0 | 31 |

CORRELATION OF B\_33 WITH C\_2

0.61

136 miRs

ALL 95 samples

|                                |             |
|--------------------------------|-------------|
| z-scores with aveUC, sdUC used | 0           |
| sum <> "" =                    | 0           |
| 97                             | index type: |
| 0                              | 1           |
| 0                              | 2           |
| 0                              | 3           |
| 0                              | 4           |
| 0                              | 6           |
| 0                              | 7           |
| 0                              | 8           |
| 0                              | 9           |
| 0                              | 10          |
| 0                              | 11          |
| 0                              | 12          |
| 0                              | 13          |
| 0                              | 14          |
| 0                              | 15          |
| 0                              | 17          |
| 0                              | 18          |
| 0                              | 19          |
| 0                              | 20          |
| 0                              | 21          |
| 0                              | 22          |
| 0                              | 23          |
| 0                              | 24          |
| 0                              | 25          |
| 0                              | 26          |
| 0                              | 27          |
| 0                              | 28          |
| 0                              | 29          |
| 0                              | 1           |



```
0 24
0 25
0 26
0 27
0 28
0 29
0 30
0 31
```

```
CORRELATION OF B_33 WITH C_2 136 miRs
0.61 95 samples
corr discard lowest 22 (thus keeping 103a-3p)
0.80
```

```
z-scores with aveUC, sdUC used 0
sum <> "" = 0
97 index type:
0 1
0 2
0 3
0 4
0 6
0 7
0 8
0 9
0 10
0 11
0 12
0 13
0 14
0 15
0 17
0 18
0 19
0 20
0 21
0 22
0 23
0 24
0 25
0 26
0 27
0 28
0 29
0 1
0 2
0 3
0 4
0 5
0 6
0 7
0 8
0 9
0 10
10.00
```





-0.46  
-0.46  
-0.46  
-0.46  
-0.46  
-0.46  
-0.46  
-0.46  
-0.45  
-0.45  
-0.45  
-0.45  
-0.45  
-0.45  
-0.45  
-0.44  
-0.44  
-0.44  
-0.44  
-0.44  
-0.44  
-0.44  
-0.43  
-0.43  
-0.43  
-0.43  
-0.43  
-0.43  
-0.43  
-0.43  
-0.43  
-0.43  
-0.43  
-0.43  
-0.42  
-0.42  
-0.42  
-0.42  
-0.42  
-0.42  
-0.42  
-0.42  
-0.42  
-0.42  
-0.42  
-0.42  
-0.42  
-0.41  
-0.41  
-0.41  
-0.41  
-0.41



































































































































































0.56  
0.56  
0.56  
0.56  
0.56  
0.56  
0.56  
0.56  
0.56  
0.57  
0.57  
0.57  
0.57  
0.57  
0.57  
0.57  
0.57  
0.58  
0.58  
0.58  
0.58  
0.58  
0.58  
0.59  
0.59  
0.59  
0.59  
0.59  
0.60  
0.60  
0.60  
0.61  
0.61  
0.61  
0.61  
0.61  
0.61  
0.61  
0.61  
0.61  
0.62  
0.62  
0.63  
0.63  
0.63  
0.64  
0.64  
0.64  
0.64  
0.64  
0.64  
0.64  
0.64  
0.65  
0.65  
0.65  
0.65  
0.65  
0.65  
0.65  
0.66  
0.66



0.66  
0.66  
0.67  
0.67  
0.67  
0.67  
0.69  
0.69  
0.69  
0.69  
0.70  
0.70  
0.70  
0.71  
0.72  
0.74  
0.74  
0.75  
0.76  
0.76  
0.77  
0.77  
0.78  
0.78  
0.78  
0.79  
0.80  
0.80  
0.81  
0.82  
0.82  
0.82  
0.83  
0.83  
0.83  
0.83  
0.85  
0.86  
0.86  
0.86  
0.87  
0.87  
0.87  
0.88  
0.89  
0.89  
0.92  
0.93  
0.96

|                                          |         |        |         |
|------------------------------------------|---------|--------|---------|
| 20000                                    | 479320  | 21319  | 1102300 |
| 6                                        |         |        |         |
| omitted if all but 486-5p < C1           | 150000  |        |         |
| omitted if grand total < D3              |         |        |         |
| 6                                        |         |        |         |
| 6 omitted: A_7, D_15, F_2, C_5, A_8, A_9 |         |        |         |
| index all samples:                       | 1       | 2      | 3       |
| index type:                              | 1       | 2      | 3       |
| total of totals of =100:                 | A_11    | A_16   | A_2     |
| sample size limit in C557                | UC      | UC     | UC      |
| 0.62                                     | 1651246 | 515917 | 5577762 |
| rand labels                              | 0.61    | 0.66   | 0.30    |
| total all samples >=100:                 | A_11    | A_16   | A_2     |
| 223271318                                | 1171926 | 494598 | 4475462 |
| 46404581                                 | 253154  | 2382   | 397359  |
| 10498404                                 | 9303    | 9512   | 44303   |
| 8999274                                  | 18873   | 920    | 14220   |
| 8841680                                  | 25490   | 1159   | 106715  |
| 8662078                                  | 29662   | 380    | 50300   |
| 7941012                                  | 3705    | 835    | 68855   |
| 5954165                                  | 6768    | 639    | 39890   |
| 3763460                                  | 986     | 127    | 13562   |
| 3462919                                  | 5884    | 74     | 50176   |
| 3417096                                  | 17952   | 549    | 60322   |
| 2188329                                  | 12700   | 149    | 24235   |
| 2132403                                  | 9540    | 228    | 19335   |
| 1899806                                  | 3495    | 93     | 17356   |
| 1668110                                  | 12666   | 178    | 23277   |
| 1418729                                  | 613     | 120    | 10364   |
| 1094550                                  | 4504    | 10     | 3283    |
| 1034732                                  | 485     | 85     | 5773    |
| 1030984                                  | 3147    | 164    | 9946    |
| 979762                                   | 2840    | 117    | 8927    |
| 906387                                   | 4036    | 346    | 6751    |
| 738707                                   | 2679    | 37     | 4052    |
| 679466                                   | 3450    | 44     | 10712   |
| 664977                                   | 2212    | 10     | 2253    |
| 625033                                   | 1526    | 104    | 3905    |
| 614841                                   | 464     | 296    | 4671    |
| 606562                                   | 2756    | 13     | 4826    |
| 549934                                   | 2591    | 44     | 4258    |
| 505881                                   | 538     | 266    | 5655    |
| 501182                                   | 905     | 105    | 6388    |
| 497825                                   | 1676    | 24     | 2416    |
| 492738                                   | 1081    | 34     | 2754    |
| 463892                                   | 1154    | 24     | 5835    |
| 457435                                   | 543     | 12     | 2502    |
| 456927                                   | 546     | 19     | 660     |
| 454196                                   | 638     | 67     | 4333    |
| 436478                                   | 1372    | 96     | 7402    |
| 393632                                   | 1273    | 224    | 3273    |
| 339414                                   | 781     | 192    | 2198    |
| 313784                                   | 455     | 259    | 2413    |
| 312924                                   | 981     | 21     | 2657    |
| 286444                                   | 1281    | 84     | 967     |
| 270499                                   | 744     | 21     | 1168    |
| 261741                                   | 1162    | 66     | 2341    |
| 249097                                   | 60      | 70     | 1377    |
| 230103                                   | 1924    | 125    | 1897    |

|        |      |     |      |
|--------|------|-----|------|
| 221424 | 803  | 21  | 1544 |
| 209492 | 591  | 5   | 1275 |
| 198409 | 1039 | 6   | 1633 |
| 178964 | 45   | 2   | 406  |
| 177822 | 172  | 4   | 263  |
| 154499 | 1136 | 27  | 797  |
| 151962 | 278  | 15  | 679  |
| 143408 | 950  | 23  | 1106 |
| 140534 | 196  | 9   | 1627 |
| 137656 | 392  | 0   | 246  |
| 134572 | 90   | 0   | 190  |
| 127276 | 368  | 18  | 1773 |
| 125050 | 266  | 4   | 594  |
| 122438 | 661  | 20  | 820  |
| 115231 | 275  | 74  | 810  |
| 106322 | 669  | 18  | 481  |
| 102310 | 341  | 9   | 468  |
| 96763  | 24   | 5   | 189  |
| 94939  | 13   | 3   | 29   |
| 93447  | 399  | 14  | 966  |
| 87914  | 144  | 4   | 1248 |
| 82826  | 308  | 0   | 206  |
| 79690  | 55   | 9   | 720  |
| 78184  | 194  | 9   | 328  |
| 75851  | 51   | 260 | 1231 |
| 72033  | 740  | 5   | 223  |
| 70273  | 353  | 22  | 758  |
| 69125  | 40   | 11  | 417  |
| 68156  | 258  | 6   | 724  |
| 67492  | 126  | 2   | 371  |
| 67274  | 607  | 3   | 357  |
| 65133  | 238  | 2   | 427  |
| 56449  | 153  | 129 | 272  |
| 56432  | 155  | 3   | 227  |
| 53045  | 234  | 6   | 110  |
| 52339  | 135  | 8   | 859  |
| 51963  | 249  | 0   | 221  |
| 51269  | 63   | 33  | 438  |
| 50621  | 1073 | 0   | 55   |
| 49200  | 76   | 1   | 249  |
| 49163  | 317  | 0   | 137  |
| 48499  | 165  | 9   | 270  |
| 41327  | 12   | 4   | 271  |
| 40550  | 134  | 7   | 184  |
| 37949  | 99   | 5   | 228  |
| 36838  | 91   | 1   | 178  |
| 36676  | 9    | 0   | 14   |
| 32919  | 174  | 0   | 210  |
| 30545  | 50   | 1   | 186  |
| 29010  | 11   | 0   | 161  |
| 28172  | 32   | 6   | 170  |
| 28131  | 53   | 3   | 84   |
| 27406  | 112  | 6   | 140  |
| 27234  | 106  | 11  | 243  |
| 26772  | 8    | 0   | 98   |
| 26326  | 438  | 0   | 200  |
| 26245  | 37   | 0   | 171  |
| 26061  | 145  | 1   | 178  |
| 25828  | 36   | 40  | 236  |

|       |     |    |     |
|-------|-----|----|-----|
| 25551 | 46  | 5  | 284 |
| 23957 | 24  | 2  | 155 |
| 23836 | 141 | 1  | 52  |
| 23463 | 58  | 10 | 122 |
| 23447 | 36  | 2  | 219 |
| 23408 | 26  | 1  | 180 |
| 23183 | 27  | 2  | 134 |
| 20724 | 111 | 3  | 158 |
| 20260 | 119 | 0  | 89  |
| 19723 | 25  | 0  | 290 |
| 18526 | 39  | 0  | 116 |
| 18158 | 76  | 5  | 208 |
| 16606 | 66  | 0  | 70  |
| 16193 | 28  | 1  | 71  |
| 16193 | 28  | 1  | 71  |
| 15377 | 95  | 2  | 106 |
| 15302 | 199 | 0  | 92  |
| 15272 | 72  | 0  | 73  |
| 14132 | 71  | 0  | 99  |
| 13689 | 36  | 1  | 97  |
| 13339 | 1   | 0  | 5   |
| 12974 | 68  | 1  | 60  |
| 12392 | 62  | 0  | 85  |
| 12317 | 69  | 0  | 55  |
| 12212 | 30  | 3  | 58  |
| 11818 | 12  | 1  | 78  |
| 11434 | 9   | 6  | 151 |
| 11121 | 26  | 0  | 48  |
| 11028 | 25  | 1  | 62  |
| 10806 | 56  | 2  | 51  |
| 10703 | 67  | 0  | 75  |
| 10605 | 29  | 0  | 39  |
| 9824  | 15  | 0  | 72  |
| 9782  | 64  | 0  | 159 |
| 9597  | 16  | 2  | 93  |
| 9488  | 45  | 0  | 37  |
| 9014  | 36  | 0  | 65  |
| 9012  | 40  | 2  | 56  |
| 8832  | 48  | 0  | 38  |
| 8236  | 24  | 0  | 53  |
| 8114  | 3   | 0  | 9   |
| 7859  | 23  | 1  | 128 |
| 7859  | 26  | 0  | 60  |
| 7834  | 7   | 0  | 61  |
| 7338  | 24  | 3  | 76  |
| 7318  | 21  | 0  | 47  |
| 7191  | 10  | 0  | 16  |
| 7081  | 12  | 0  | 110 |
| 7035  | 41  | 0  | 49  |
| 6797  | 16  | 1  | 39  |
| 6584  | 78  | 0  | 19  |
| 6466  | 40  | 0  | 52  |
| 6416  | 9   | 4  | 71  |
| 6377  | 69  | 0  | 19  |
| 6243  | 63  | 1  | 43  |
| 6242  | 34  | 0  | 63  |
| 6205  | 1   | 0  | 6   |
| 6134  | 28  | 0  | 22  |
| 6081  | 9   | 0  | 18  |

|      |     |   |     |
|------|-----|---|-----|
| 6064 | 22  | 0 | 31  |
| 6037 | 7   | 1 | 18  |
| 5856 | 23  | 0 | 59  |
| 5792 | 20  | 2 | 43  |
| 5689 | 132 | 0 | 6   |
| 5638 | 6   | 0 | 11  |
| 5485 | 55  | 0 | 125 |
| 5465 | 21  | 0 | 25  |
| 5452 | 14  | 0 | 37  |
| 5418 | 23  | 0 | 41  |
| 5411 | 15  | 1 | 20  |
| 5405 | 3   | 0 | 15  |
| 5398 | 11  | 0 | 14  |
| 5381 | 96  | 0 | 19  |
| 5381 | 11  | 1 | 23  |
| 5198 | 67  | 0 | 45  |
| 4983 | 56  | 0 | 20  |
| 4907 | 13  | 2 | 65  |
| 4692 | 1   | 0 | 24  |
| 4676 | 93  | 1 | 21  |
| 4641 | 3   | 1 | 34  |
| 4477 | 22  | 1 | 13  |
| 4443 | 18  | 2 | 24  |
| 4439 | 1   | 0 | 22  |
| 4400 | 60  | 0 | 30  |
| 4359 | 11  | 1 | 16  |
| 4323 | 1   | 0 | 12  |
| 4232 | 31  | 0 | 0   |
| 4205 | 0   | 0 | 6   |
| 4174 | 12  | 1 | 15  |
| 4157 | 9   | 3 | 18  |
| 4141 | 20  | 1 | 41  |
| 3995 | 12  | 1 | 28  |
| 3968 | 4   | 0 | 2   |
| 3955 | 14  | 0 | 48  |
| 3845 | 30  | 0 | 20  |
| 3785 | 45  | 1 | 63  |
| 3707 | 3   | 0 | 11  |
| 3686 | 12  | 0 | 14  |
| 3620 | 23  | 0 | 21  |
| 3618 | 9   | 0 | 14  |
| 3607 | 0   | 0 | 29  |
| 3546 | 52  | 0 | 15  |
| 3529 | 12  | 0 | 28  |
| 3504 | 17  | 0 | 24  |
| 3467 | 13  | 1 | 36  |
| 3415 | 39  | 0 | 49  |
| 3391 | 12  | 0 | 25  |
| 3235 | 6   | 0 | 4   |
| 3142 | 1   | 0 | 18  |
| 3042 | 8   | 0 | 25  |
| 3041 | 18  | 0 | 8   |
| 3023 | 5   | 1 | 14  |
| 2999 | 1   | 0 | 8   |
| 2816 | 6   | 0 | 10  |
| 2792 | 0   | 0 | 1   |
| 2699 | 4   | 0 | 35  |
| 2612 | 0   | 2 | 17  |
| 2540 | 19  | 0 | 24  |

|      |    |   |    |
|------|----|---|----|
| 2502 | 21 | 0 | 30 |
| 2419 | 34 | 0 | 25 |
| 2275 | 12 | 0 | 22 |
| 2252 | 18 | 0 | 11 |
| 2239 | 7  | 0 | 23 |
| 2235 | 12 | 0 | 23 |
| 2207 | 7  | 0 | 13 |
| 2170 | 14 | 0 | 42 |
| 2147 | 4  | 0 | 10 |
| 2119 | 4  | 0 | 20 |
| 2115 | 2  | 0 | 5  |
| 2034 | 15 | 1 | 10 |
| 2010 | 2  | 0 | 14 |
| 1960 | 19 | 0 | 23 |
| 1952 | 10 | 0 | 11 |
| 1929 | 3  | 0 | 1  |
| 1891 | 1  | 0 | 12 |
| 1888 | 7  | 0 | 19 |
| 1869 | 21 | 0 | 5  |
| 1862 | 15 | 0 | 6  |
| 1855 | 2  | 1 | 16 |
| 1845 | 10 | 1 | 13 |
| 1845 | 10 | 1 | 13 |
| 1751 | 19 | 0 | 6  |
| 1720 | 2  | 0 | 15 |
| 1718 | 2  | 0 | 29 |
| 1710 | 10 | 0 | 3  |
| 1707 | 1  | 0 | 12 |
| 1691 | 5  | 0 | 11 |
| 1646 | 3  | 0 | 12 |
| 1619 | 6  | 1 | 17 |
| 1607 | 6  | 0 | 5  |
| 1586 | 1  | 0 | 1  |
| 1585 | 2  | 1 | 22 |
| 1580 | 6  | 0 | 9  |
| 1576 | 11 | 0 | 30 |
| 1567 | 0  | 0 | 1  |
| 1552 | 7  | 0 | 18 |
| 1548 | 2  | 0 | 10 |
| 1508 | 3  | 0 | 7  |
| 1463 | 6  | 0 | 13 |
| 1443 | 2  | 0 | 10 |
| 1392 | 13 | 0 | 5  |
| 1382 | 7  | 0 | 7  |
| 1377 | 11 | 0 | 7  |
| 1351 | 10 | 0 | 15 |
| 1323 | 0  | 0 | 0  |
| 1311 | 7  | 0 | 5  |
| 1251 | 3  | 0 | 16 |
| 1239 | 2  | 0 | 14 |
| 1239 | 7  | 0 | 7  |
| 1226 | 4  | 0 | 12 |
| 1221 | 0  | 0 | 0  |
| 1216 | 8  | 1 | 19 |
| 1214 | 2  | 0 | 5  |
| 1212 | 5  | 0 | 3  |
| 1206 | 7  | 0 | 4  |
| 1162 | 8  | 1 | 8  |
| 1134 | 3  | 0 | 3  |

|      |    |   |    |
|------|----|---|----|
| 1131 | 16 | 0 | 2  |
| 1127 | 4  | 1 | 6  |
| 1118 | 10 | 0 | 3  |
| 1111 | 4  | 0 | 4  |
| 1104 | 3  | 0 | 5  |
| 1075 | 5  | 0 | 6  |
| 1072 | 2  | 0 | 5  |
| 1066 | 25 | 0 | 3  |
| 1053 | 0  | 1 | 3  |
| 1052 | 1  | 0 | 5  |
| 1048 | 0  | 0 | 4  |
| 1038 | 5  | 0 | 3  |
| 1038 | 6  | 1 | 6  |
| 1029 | 5  | 0 | 0  |
| 1005 | 13 | 0 | 3  |
| 1001 | 2  | 0 | 7  |
| 997  | 0  | 0 | 25 |
| 974  | 4  | 0 | 7  |
| 961  | 19 | 0 | 5  |
| 949  | 9  | 0 | 5  |
| 942  | 4  | 0 | 4  |
| 930  | 3  | 0 | 10 |
| 925  | 5  | 0 | 4  |
| 920  | 11 | 0 | 13 |
| 898  | 1  | 0 | 4  |
| 887  | 0  | 0 | 8  |
| 872  | 11 | 0 | 3  |
| 858  | 6  | 0 | 8  |
| 818  | 0  | 0 | 8  |
| 806  | 0  | 0 | 0  |
| 796  | 3  | 0 | 9  |
| 796  | 0  | 0 | 2  |
| 794  | 0  | 0 | 3  |
| 789  | 1  | 2 | 8  |
| 783  | 3  | 0 | 14 |
| 771  | 4  | 0 | 6  |
| 770  | 7  | 0 | 4  |
| 763  | 9  | 0 | 7  |
| 741  | 7  | 0 | 1  |
| 739  | 0  | 0 | 3  |
| 733  | 2  | 0 | 2  |
| 718  | 1  | 0 | 7  |
| 709  | 7  | 0 | 3  |
| 706  | 0  | 0 | 3  |
| 701  | 7  | 0 | 2  |
| 700  | 12 | 0 | 0  |
| 683  | 6  | 0 | 7  |
| 658  | 1  | 1 | 11 |
| 658  | 6  | 1 | 5  |
| 646  | 1  | 0 | 7  |
| 640  | 2  | 0 | 4  |
| 639  | 3  | 0 | 1  |
| 639  | 0  | 0 | 2  |
| 637  | 0  | 0 | 3  |
| 629  | 0  | 0 | 3  |
| 628  | 2  | 0 | 0  |
| 624  | 1  | 0 | 1  |
| 607  | 2  | 1 | 0  |
| 605  | 8  | 0 | 11 |

|     |   |   |    |
|-----|---|---|----|
| 604 | 1 | 0 | 13 |
| 601 | 4 | 0 | 5  |
| 592 | 4 | 0 | 3  |
| 591 | 2 | 0 | 1  |
| 573 | 0 | 0 | 2  |
| 571 | 0 | 0 | 1  |
| 566 | 6 | 0 | 4  |
| 564 | 2 | 0 | 3  |
| 553 | 3 | 0 | 8  |
| 545 | 0 | 0 | 1  |
| 544 | 3 | 0 | 3  |
| 528 | 1 | 0 | 2  |
| 525 | 2 | 0 | 20 |
| 521 | 0 | 0 | 1  |
| 518 | 1 | 0 | 4  |
| 512 | 4 | 0 | 6  |
| 495 | 1 | 0 | 0  |
| 471 | 8 | 0 | 2  |
| 463 | 1 | 0 | 2  |
| 463 | 3 | 0 | 2  |
| 454 | 1 | 0 | 0  |
| 451 | 3 | 0 | 1  |
| 443 | 0 | 0 | 6  |
| 441 | 1 | 0 | 5  |
| 438 | 3 | 0 | 2  |
| 434 | 3 | 0 | 6  |
| 427 | 0 | 0 | 0  |
| 418 | 0 | 0 | 0  |
| 412 | 2 | 0 | 7  |
| 394 | 1 | 0 | 6  |
| 394 | 2 | 1 | 3  |
| 383 | 1 | 0 | 1  |
| 374 | 1 | 0 | 2  |
| 374 | 0 | 0 | 1  |
| 371 | 2 | 0 | 1  |
| 370 | 3 | 0 | 3  |
| 356 | 0 | 0 | 1  |
| 354 | 0 | 0 | 2  |
| 353 | 5 | 0 | 1  |
| 352 | 0 | 0 | 1  |
| 351 | 0 | 0 | 3  |
| 350 | 6 | 0 | 2  |
| 348 | 6 | 0 | 4  |
| 335 | 2 | 0 | 1  |
| 330 | 0 | 0 | 3  |
| 329 | 2 | 0 | 0  |
| 328 | 0 | 0 | 3  |
| 322 | 0 | 0 | 2  |
| 320 | 0 | 0 | 1  |
| 319 | 2 | 0 | 0  |
| 318 | 3 | 0 | 4  |
| 317 | 3 | 0 | 2  |
| 313 | 1 | 0 | 5  |
| 311 | 2 | 0 | 0  |
| 311 | 1 | 0 | 4  |
| 310 | 1 | 0 | 3  |
| 308 | 0 | 0 | 1  |
| 307 | 3 | 0 | 4  |
| 302 | 0 | 1 | 0  |



|     |   |   |   |
|-----|---|---|---|
| 296 | 0 | 0 | 1 |
| 295 | 2 | 0 | 0 |
| 286 | 0 | 0 | 5 |
| 286 | 1 | 0 | 1 |
| 285 | 3 | 1 | 1 |
| 281 | 1 | 0 | 1 |
| 280 | 1 | 0 | 0 |
| 279 | 0 | 0 | 1 |
| 278 | 1 | 1 | 3 |
| 276 | 3 | 0 | 2 |
| 275 | 0 | 0 | 2 |
| 273 | 0 | 0 | 0 |
| 273 | 0 | 0 | 0 |
| 269 | 1 | 0 | 1 |
| 266 | 4 | 0 | 1 |
| 258 | 1 | 0 | 1 |
| 257 | 2 | 0 | 2 |
| 246 | 4 | 0 | 1 |
| 246 | 0 | 0 | 0 |
| 246 | 1 | 0 | 0 |
| 245 | 3 | 0 | 1 |
| 244 | 0 | 0 | 2 |
| 241 | 2 | 0 | 2 |
| 241 | 1 | 0 | 1 |
| 237 | 4 | 0 | 1 |
| 236 | 0 | 0 | 0 |
| 235 | 1 | 0 | 1 |
| 232 | 0 | 1 | 1 |
| 230 | 0 | 0 | 0 |
| 230 | 1 | 0 | 0 |
| 229 | 0 | 0 | 0 |
| 229 | 1 | 0 | 0 |
| 229 | 0 | 0 | 2 |
| 225 | 1 | 0 | 2 |
| 224 | 0 | 0 | 0 |
| 224 | 0 | 0 | 2 |
| 223 | 1 | 0 | 4 |
| 223 | 2 | 0 | 1 |
| 221 | 2 | 0 | 1 |
| 221 | 4 | 0 | 3 |
| 219 | 0 | 0 | 0 |
| 212 | 0 | 0 | 0 |
| 208 | 0 | 0 | 1 |
| 207 | 1 | 0 | 0 |
| 204 | 1 | 0 | 1 |
| 204 | 0 | 0 | 1 |
| 199 | 0 | 0 | 0 |
| 198 | 1 | 0 | 2 |
| 198 | 0 | 1 | 5 |
| 197 | 0 | 0 | 2 |
| 196 | 0 | 1 | 3 |
| 196 | 0 | 0 | 2 |
| 196 | 0 | 0 | 3 |
| 194 | 0 | 0 | 0 |
| 189 | 1 | 0 | 2 |
| 185 | 0 | 0 | 1 |
| 182 | 2 | 0 | 2 |
| 182 | 2 | 0 | 2 |
| 176 | 1 | 0 | 0 |

|     |   |   |   |
|-----|---|---|---|
| 176 | 4 | 0 | 0 |
| 172 | 0 | 0 | 0 |
| 172 | 0 | 0 | 0 |
| 168 | 0 | 0 | 1 |
| 166 | 0 | 0 | 0 |
| 164 | 1 | 0 | 0 |
| 163 | 1 | 0 | 1 |
| 162 | 0 | 0 | 1 |
| 162 | 0 | 0 | 0 |
| 161 | 0 | 0 | 2 |
| 160 | 0 | 0 | 0 |
| 157 | 0 | 0 | 0 |
| 155 | 0 | 0 | 1 |
| 153 | 1 | 0 | 0 |
| 152 | 0 | 0 | 1 |
| 151 | 0 | 0 | 4 |
| 149 | 1 | 0 | 1 |
| 149 | 0 | 0 | 1 |
| 149 | 0 | 0 | 1 |
| 147 | 1 | 0 | 1 |
| 146 | 0 | 0 | 1 |
| 144 | 0 | 0 | 1 |
| 143 | 0 | 0 | 0 |
| 143 | 0 | 0 | 1 |
| 142 | 0 | 0 | 0 |
| 141 | 1 | 0 | 2 |
| 141 | 0 | 0 | 1 |
| 140 | 2 | 0 | 0 |
| 138 | 0 | 0 | 0 |
| 137 | 0 | 0 | 1 |
| 137 | 0 | 0 | 3 |
| 135 | 1 | 0 | 1 |
| 134 | 0 | 0 | 0 |
| 134 | 0 | 0 | 1 |
| 133 | 0 | 0 | 0 |
| 133 | 2 | 0 | 2 |
| 133 | 0 | 0 | 0 |
| 132 | 0 | 0 | 0 |
| 132 | 0 | 0 | 1 |
| 132 | 0 | 0 | 0 |
| 130 | 4 | 0 | 0 |
| 130 | 0 | 0 | 0 |
| 129 | 1 | 0 | 0 |
| 128 | 0 | 0 | 2 |
| 126 | 0 | 0 | 0 |
| 124 | 0 | 0 | 3 |
| 122 | 0 | 0 | 1 |
| 119 | 2 | 0 | 4 |
| 119 | 1 | 0 | 0 |
| 118 | 0 | 0 | 0 |
| 118 | 1 | 0 | 1 |
| 117 | 1 | 0 | 1 |
| 117 | 1 | 0 | 3 |
| 116 | 1 | 0 | 0 |
| 116 | 1 | 0 | 1 |
| 113 | 0 | 0 | 1 |
| 113 | 0 | 0 | 0 |
| 110 | 0 | 0 | 0 |
| 110 | 4 | 0 | 0 |

|                              |         |        |         |
|------------------------------|---------|--------|---------|
| 107                          | 0       | 0      | 0       |
| 107                          | 1       | 0      | 1       |
| 106                          | 0       | 0      | 0       |
| 106                          | 0       | 0      | 0       |
| 106                          | 1       | 0      | 0       |
| 103                          | 0       | 0      | 0       |
| 103                          | 2       | 0      | 0       |
| 102                          | 0       | 0      | 0       |
| 102                          | 1       | 0      | 1       |
| 101                          | 2       | 0      | 0       |
| 100                          | 1       | 0      | 1       |
| 100                          | 2       | 0      | 0       |
| total reads <= 100 in top 30 | 0       | 9      | 0       |
|                              | A_11    | A_16   | A_2     |
|                              | UC      | UC     | UC      |
| 223271318                    | 1171926 | 494598 | 4475462 |
| divide ave top31             | 22      | 30     | 25      |
| z-score                      | 0.24    | 1.79   | 0.82    |
| ttest UC v P                 | 0.07    |        |         |
| ttest NP v P                 | 0.93    |        |         |

XX SAMPLES specified here:

|                             |        |       |         |
|-----------------------------|--------|-------|---------|
| rand sampling numbers=      | 0.93   | 0.57  | 0.09    |
| 38                          | 3      | 13    | 26      |
| 95                          | 1      | 1     | 1       |
| index all samples:          | 1      | 2     | 3       |
| index type:                 | 1      | 2     | 3       |
| total of totals of =100:    | A_11   | A_16  | A_2     |
| 139587919                   | UC     | UC    | UC      |
| total all miRNA reads =100: | 479320 | 21319 | 1102300 |
| total all samples =100:     | A_11   | A_16  | A_2     |
| 46389442                    | 253154 | 2382  | 397359  |
| 10497180                    | 9303   | 9512  | 44303   |
| 8994745                     | 18873  | 920   | 14220   |
| 8839402                     | 25490  | 1159  | 106715  |
| 8658137                     | 29662  | 380   | 50300   |
| 7939871                     | 3705   | 835   | 68855   |
| 5953261                     | 6768   | 639   | 39890   |
| 3762724                     | 986    | 127   | 13562   |
| 3462453                     | 5884   | 74    | 50176   |
| 3413660                     | 17952  | 549   | 60322   |
| 2186845                     | 12700  | 149   | 24235   |
| 2131733                     | 9540   | 228   | 19335   |
| 1899491                     | 3495   | 93    | 17356   |
| 1666971                     | 12666  | 178   | 23277   |
| 1418336                     | 613    | 120   | 10364   |
| 1093922                     | 4504   | 10    | 3283    |
| 1034642                     | 485    | 85    | 5773    |
| 1030775                     | 3147   | 164   | 9946    |
| 979581                      | 2840   | 117   | 8927    |

|        |      |     |       |
|--------|------|-----|-------|
| 903691 | 4036 | 346 | 6751  |
| 738230 | 2679 | 37  | 4052  |
| 679306 | 3450 | 44  | 10712 |
| 664224 | 2212 | 10  | 2253  |
| 624773 | 1526 | 104 | 3905  |
| 614674 | 464  | 296 | 4671  |
| 605614 | 2756 | 13  | 4826  |
| 549148 | 2591 | 44  | 4258  |
| 501331 | 538  | 266 | 5655  |
| 500966 | 905  | 105 | 6388  |
| 497718 | 1676 | 24  | 2416  |
| 492626 | 1081 | 34  | 2754  |
| 463804 | 1154 | 24  | 5835  |
| 457362 | 543  | 12  | 2502  |
| 456843 | 546  | 19  | 660   |
| 454020 | 638  | 67  | 4333  |
| 436288 | 1372 | 96  | 7402  |
| 393199 | 1273 | 224 | 3273  |
| 339140 | 781  | 192 | 2198  |
| 313699 | 455  | 259 | 2413  |
| 312449 | 981  | 21  | 2657  |
| 286288 | 1281 | 84  | 967   |
| 270366 | 744  | 21  | 1168  |
| 261666 | 1162 | 66  | 2341  |
| 248983 | 60   | 70  | 1377  |
| 229733 | 1924 | 125 | 1897  |
| 221365 | 803  | 21  | 1544  |
| 209441 | 591  | 5   | 1275  |
| 198175 | 1039 | 6   | 1633  |
| 178962 | 45   | 2   | 406   |
| 177234 | 172  | 4   | 263   |
| 154285 | 1136 | 27  | 797   |
| 151875 | 278  | 15  | 679   |
| 143334 | 950  | 23  | 1106  |
| 138740 | 196  | 9   | 1627  |
| 137573 | 392  | 0   | 246   |
| 134502 | 90   | 0   | 190   |
| 127210 | 368  | 18  | 1773  |
| 125038 | 266  | 4   | 594   |
| 122415 | 661  | 20  | 820   |
| 115160 | 275  | 74  | 810   |
| 106297 | 669  | 18  | 481   |
| 102201 | 341  | 9   | 468   |
| 96743  | 24   | 5   | 189   |
| 94911  | 13   | 3   | 29    |
| 93386  | 399  | 14  | 966   |
| 87898  | 144  | 4   | 1248  |
| 82798  | 308  | 0   | 206   |
| 79678  | 55   | 9   | 720   |
| 78156  | 194  | 9   | 328   |
| 75744  | 51   | 260 | 1231  |
| 71988  | 740  | 5   | 223   |
| 70256  | 353  | 22  | 758   |
| 69114  | 40   | 11  | 417   |
| 68018  | 258  | 6   | 724   |
| 67482  | 126  | 2   | 371   |
| 67182  | 607  | 3   | 357   |
| 65049  | 238  | 2   | 427   |
| 56245  | 153  | 129 | 272   |

|       |      |    |     |
|-------|------|----|-----|
| 56410 | 155  | 3  | 227 |
| 53026 | 234  | 6  | 110 |
| 52323 | 135  | 8  | 859 |
| 51847 | 249  | 0  | 221 |
| 51252 | 63   | 33 | 438 |
| 50588 | 1073 | 0  | 55  |
| 49172 | 76   | 1  | 249 |
| 49098 | 317  | 0  | 137 |
| 48416 | 165  | 9  | 270 |
| 41318 | 12   | 4  | 271 |
| 40544 | 134  | 7  | 184 |
| 37943 | 99   | 5  | 228 |
| 36605 | 91   | 1  | 178 |
| 36676 | 9    | 0  | 14  |
| 32906 | 174  | 0  | 210 |
| 30537 | 50   | 1  | 186 |
| 29005 | 11   | 0  | 161 |
| 28163 | 32   | 6  | 170 |
| 28118 | 53   | 3  | 84  |
| 27350 | 112  | 6  | 140 |
| 27199 | 106  | 11 | 243 |
| 26769 | 8    | 0  | 98  |
| 26325 | 438  | 0  | 200 |
| 26241 | 37   | 0  | 171 |
| 26016 | 145  | 1  | 178 |
| 25811 | 36   | 40 | 236 |
| 25540 | 46   | 5  | 284 |
| 23949 | 24   | 2  | 155 |
| 23822 | 141  | 1  | 52  |
| 23449 | 58   | 10 | 122 |
| 23446 | 36   | 2  | 219 |
| 23397 | 26   | 1  | 180 |
| 23176 | 27   | 2  | 134 |
| 20718 | 111  | 3  | 158 |
| 20235 | 119  | 0  | 89  |
| 19721 | 25   | 0  | 290 |
| 18520 | 39   | 0  | 116 |
| 18147 | 76   | 5  | 208 |
| 16585 | 66   | 0  | 70  |
| 16186 | 28   | 1  | 71  |
| 16186 | 28   | 1  | 71  |
| 15369 | 95   | 2  | 106 |
| 15277 | 199  | 0  | 92  |
| 15261 | 72   | 0  | 73  |
| 14130 | 71   | 0  | 99  |
| 13673 | 36   | 1  | 97  |
| 13338 | 1    | 0  | 5   |
| 12970 | 68   | 1  | 60  |
| 12358 | 62   | 0  | 85  |
| 12315 | 69   | 0  | 55  |
| 12195 | 30   | 3  | 58  |
| 11818 | 12   | 1  | 78  |
| 11405 | 9    | 6  | 151 |
| 11100 | 26   | 0  | 48  |
| 11007 | 25   | 1  | 62  |
| 10799 | 56   | 2  | 51  |
| 10674 | 67   | 0  | 75  |
| 10591 | 29   | 0  | 39  |
| 9795  | 15   | 0  | 72  |

|      |     |   |     |
|------|-----|---|-----|
| 9779 | 64  | 0 | 159 |
| 9597 | 16  | 2 | 93  |
| 9484 | 45  | 0 | 37  |
| 8988 | 36  | 0 | 65  |
| 9010 | 40  | 2 | 56  |
| 8799 | 48  | 0 | 38  |
| 8234 | 24  | 0 | 53  |
| 8112 | 3   | 0 | 9   |
| 7853 | 23  | 1 | 128 |
| 7857 | 26  | 0 | 60  |
| 7833 | 7   | 0 | 61  |
| 7337 | 24  | 3 | 76  |
| 7313 | 21  | 0 | 47  |
| 7188 | 10  | 0 | 16  |
| 7081 | 12  | 0 | 110 |
| 7031 | 41  | 0 | 49  |
| 6794 | 16  | 1 | 39  |
| 6526 | 78  | 0 | 19  |
| 6466 | 40  | 0 | 52  |
| 6415 | 9   | 4 | 71  |
| 6371 | 69  | 0 | 19  |
| 6235 | 63  | 1 | 43  |
| 6234 | 34  | 0 | 63  |
| 6205 | 1   | 0 | 6   |
| 6131 | 28  | 0 | 22  |
| 6075 | 9   | 0 | 18  |
| 6064 | 22  | 0 | 31  |
| 6037 | 7   | 1 | 18  |
| 5852 | 23  | 0 | 59  |
| 5791 | 20  | 2 | 43  |
| 5684 | 132 | 0 | 6   |
| 5638 | 6   | 0 | 11  |
| 5483 | 55  | 0 | 125 |
| 5462 | 21  | 0 | 25  |
| 5445 | 14  | 0 | 37  |
| 5410 | 23  | 0 | 41  |
| 5409 | 15  | 1 | 20  |
| 5404 | 3   | 0 | 15  |
| 5394 | 11  | 0 | 14  |
| 5376 | 96  | 0 | 19  |
| 5378 | 11  | 1 | 23  |
| 5198 | 67  | 0 | 45  |
| 4981 | 56  | 0 | 20  |
| 4906 | 13  | 2 | 65  |
| 4691 | 1   | 0 | 24  |
| 4664 | 93  | 1 | 21  |
| 4641 | 3   | 1 | 34  |
| 4449 | 22  | 1 | 13  |
| 4437 | 18  | 2 | 24  |
| 4439 | 1   | 0 | 22  |
| 4396 | 60  | 0 | 30  |
| 4359 | 11  | 1 | 16  |
| 4317 | 1   | 0 | 12  |
| 4227 | 31  | 0 | 0   |
| 4204 | 0   | 0 | 6   |
| 4173 | 12  | 1 | 15  |
| 4157 | 9   | 3 | 18  |
| 4113 | 20  | 1 | 41  |
| 3993 | 12  | 1 | 28  |

|      |    |   |    |
|------|----|---|----|
| 3954 | 4  | 0 | 2  |
| 3954 | 14 | 0 | 48 |
| 3836 | 30 | 0 | 20 |
| 3781 | 45 | 1 | 63 |
| 3706 | 3  | 0 | 11 |
| 3683 | 12 | 0 | 14 |
| 3618 | 23 | 0 | 21 |
| 3550 | 9  | 0 | 14 |
| 3607 | 0  | 0 | 29 |
| 3539 | 52 | 0 | 15 |
| 3527 | 12 | 0 | 28 |
| 3502 | 17 | 0 | 24 |
| 3467 | 13 | 1 | 36 |
| 3405 | 39 | 0 | 49 |
| 3388 | 12 | 0 | 25 |
| 3235 | 6  | 0 | 4  |
| 3139 | 1  | 0 | 18 |
| 3039 | 8  | 0 | 25 |
| 3036 | 18 | 0 | 8  |
| 3023 | 5  | 1 | 14 |
| 2999 | 1  | 0 | 8  |
| 2814 | 6  | 0 | 10 |
| 2792 | 0  | 0 | 1  |
| 2699 | 4  | 0 | 35 |
| 2607 | 0  | 2 | 17 |
| 2540 | 19 | 0 | 24 |
| 2500 | 21 | 0 | 30 |
| 2416 | 34 | 0 | 25 |
| 2275 | 12 | 0 | 22 |
| 2250 | 18 | 0 | 11 |
| 2236 | 7  | 0 | 23 |
| 2231 | 12 | 0 | 23 |
| 2207 | 7  | 0 | 13 |
| 2170 | 14 | 0 | 42 |
| 2146 | 4  | 0 | 10 |
| 2119 | 4  | 0 | 20 |
| 2114 | 2  | 0 | 5  |
| 2033 | 15 | 1 | 10 |
| 2009 | 2  | 0 | 14 |
| 1957 | 19 | 0 | 23 |
| 1952 | 10 | 0 | 11 |
| 1926 | 3  | 0 | 1  |
| 1890 | 1  | 0 | 12 |
| 1888 | 7  | 0 | 19 |
| 1866 | 21 | 0 | 5  |
| 1862 | 15 | 0 | 6  |
| 1854 | 2  | 1 | 16 |
| 1843 | 10 | 1 | 13 |
| 1843 | 10 | 1 | 13 |
| 1750 | 19 | 0 | 6  |
| 1719 | 2  | 0 | 15 |
| 1715 | 2  | 0 | 29 |
| 1709 | 10 | 0 | 3  |
| 1707 | 1  | 0 | 12 |
| 1690 | 5  | 0 | 11 |
| 1641 | 3  | 0 | 12 |
| 1619 | 6  | 1 | 17 |
| 1607 | 6  | 0 | 5  |
| 1586 | 1  | 0 | 1  |

|      |    |   |    |
|------|----|---|----|
| 1585 | 2  | 1 | 22 |
| 1577 | 6  | 0 | 9  |
| 1576 | 11 | 0 | 30 |
| 1567 | 0  | 0 | 1  |
| 1552 | 7  | 0 | 18 |
| 1548 | 2  | 0 | 10 |
| 1507 | 3  | 0 | 7  |
| 1463 | 6  | 0 | 13 |
| 1443 | 2  | 0 | 10 |
| 1383 | 13 | 0 | 5  |
| 1382 | 7  | 0 | 7  |
| 1377 | 11 | 0 | 7  |
| 1351 | 10 | 0 | 15 |
| 1322 | 0  | 0 | 0  |
| 1307 | 7  | 0 | 5  |
| 1250 | 3  | 0 | 16 |
| 1237 | 2  | 0 | 14 |
| 1239 | 7  | 0 | 7  |
| 1226 | 4  | 0 | 12 |
| 1221 | 0  | 0 | 0  |
| 1216 | 8  | 1 | 19 |
| 1214 | 2  | 0 | 5  |
| 1209 | 5  | 0 | 3  |
| 1206 | 7  | 0 | 4  |
| 1161 | 8  | 1 | 8  |
| 1134 | 3  | 0 | 3  |
| 1131 | 16 | 0 | 2  |
| 1126 | 4  | 1 | 6  |
| 1118 | 10 | 0 | 3  |
| 1109 | 4  | 0 | 4  |
| 1104 | 3  | 0 | 5  |
| 1074 | 5  | 0 | 6  |
| 1072 | 2  | 0 | 5  |
| 1064 | 25 | 0 | 3  |
| 1052 | 0  | 1 | 3  |
| 1051 | 1  | 0 | 5  |
| 1047 | 0  | 0 | 4  |
| 1037 | 5  | 0 | 3  |
| 1038 | 6  | 1 | 6  |
| 1026 | 5  | 0 | 0  |
| 998  | 13 | 0 | 3  |
| 1001 | 2  | 0 | 7  |
| 997  | 0  | 0 | 25 |
| 973  | 4  | 0 | 7  |
| 960  | 19 | 0 | 5  |
| 949  | 9  | 0 | 5  |
| 942  | 4  | 0 | 4  |
| 930  | 3  | 0 | 10 |
| 925  | 5  | 0 | 4  |
| 917  | 11 | 0 | 13 |
| 897  | 1  | 0 | 4  |
| 887  | 0  | 0 | 8  |
| 872  | 11 | 0 | 3  |
| 858  | 6  | 0 | 8  |
| 818  | 0  | 0 | 8  |
| 805  | 0  | 0 | 0  |
| 794  | 3  | 0 | 9  |
| 795  | 0  | 0 | 2  |
| 794  | 0  | 0 | 3  |



|     |    |   |    |
|-----|----|---|----|
| 789 | 1  | 2 | 8  |
| 782 | 3  | 0 | 14 |
| 771 | 4  | 0 | 6  |
| 768 | 7  | 0 | 4  |
| 761 | 9  | 0 | 7  |
| 741 | 7  | 0 | 1  |
| 739 | 0  | 0 | 3  |
| 733 | 2  | 0 | 2  |
| 718 | 1  | 0 | 7  |
| 709 | 7  | 0 | 3  |
| 705 | 0  | 0 | 3  |
| 701 | 7  | 0 | 2  |
| 697 | 12 | 0 | 0  |
| 683 | 6  | 0 | 7  |
| 656 | 1  | 1 | 11 |
| 657 | 6  | 1 | 5  |
| 646 | 1  | 0 | 7  |
| 640 | 2  | 0 | 4  |
| 639 | 3  | 0 | 1  |
| 639 | 0  | 0 | 2  |
| 637 | 0  | 0 | 3  |
| 629 | 0  | 0 | 3  |
| 628 | 2  | 0 | 0  |
| 624 | 1  | 0 | 1  |
| 603 | 2  | 1 | 0  |
| 600 | 8  | 0 | 11 |
| 594 | 1  | 0 | 13 |
| 600 | 4  | 0 | 5  |
| 591 | 4  | 0 | 3  |
| 591 | 2  | 0 | 1  |
| 572 | 0  | 0 | 2  |
| 571 | 0  | 0 | 1  |
| 566 | 6  | 0 | 4  |
| 564 | 2  | 0 | 3  |
| 552 | 3  | 0 | 8  |
| 544 | 0  | 0 | 1  |
| 544 | 3  | 0 | 3  |
| 528 | 1  | 0 | 2  |
| 525 | 2  | 0 | 20 |
| 521 | 0  | 0 | 1  |
| 518 | 1  | 0 | 4  |
| 511 | 4  | 0 | 6  |
| 495 | 1  | 0 | 0  |
| 471 | 8  | 0 | 2  |
| 463 | 1  | 0 | 2  |
| 463 | 3  | 0 | 2  |
| 454 | 1  | 0 | 0  |
| 450 | 3  | 0 | 1  |
| 443 | 0  | 0 | 6  |
| 440 | 1  | 0 | 5  |
| 438 | 3  | 0 | 2  |
| 434 | 3  | 0 | 6  |
| 427 | 0  | 0 | 0  |
| 418 | 0  | 0 | 0  |
| 408 | 2  | 0 | 7  |
| 394 | 1  | 0 | 6  |
| 394 | 2  | 1 | 3  |
| 383 | 1  | 0 | 1  |
| 374 | 1  | 0 | 2  |

|     |   |   |   |
|-----|---|---|---|
| 374 | 0 | 0 | 1 |
| 371 | 2 | 0 | 1 |
| 370 | 3 | 0 | 3 |
| 356 | 0 | 0 | 1 |
| 354 | 0 | 0 | 2 |
| 352 | 5 | 0 | 1 |
| 352 | 0 | 0 | 1 |
| 351 | 0 | 0 | 3 |
| 349 | 6 | 0 | 2 |
| 348 | 6 | 0 | 4 |
| 335 | 2 | 0 | 1 |
| 330 | 0 | 0 | 3 |
| 328 | 2 | 0 | 0 |
| 328 | 0 | 0 | 3 |
| 321 | 0 | 0 | 2 |
| 320 | 0 | 0 | 1 |
| 319 | 2 | 0 | 0 |
| 318 | 3 | 0 | 4 |
| 317 | 3 | 0 | 2 |
| 313 | 1 | 0 | 5 |
| 311 | 2 | 0 | 0 |
| 311 | 1 | 0 | 4 |
| 308 | 1 | 0 | 3 |
| 308 | 0 | 0 | 1 |
| 307 | 3 | 0 | 4 |
| 302 | 0 | 1 | 0 |
| 296 | 0 | 0 | 1 |
| 294 | 2 | 0 | 0 |
| 286 | 0 | 0 | 5 |
| 285 | 1 | 0 | 1 |
| 285 | 3 | 1 | 1 |
| 280 | 1 | 0 | 1 |
| 280 | 1 | 0 | 0 |
| 279 | 0 | 0 | 1 |
| 278 | 1 | 1 | 3 |
| 275 | 3 | 0 | 2 |
| 275 | 0 | 0 | 2 |
| 272 | 0 | 0 | 0 |
| 273 | 0 | 0 | 0 |
| 269 | 1 | 0 | 1 |
| 266 | 4 | 0 | 1 |
| 258 | 1 | 0 | 1 |
| 257 | 2 | 0 | 2 |
| 246 | 4 | 0 | 1 |
| 246 | 0 | 0 | 0 |
| 246 | 1 | 0 | 0 |
| 245 | 3 | 0 | 1 |
| 244 | 0 | 0 | 2 |
| 241 | 2 | 0 | 2 |
| 241 | 1 | 0 | 1 |
| 237 | 4 | 0 | 1 |
| 236 | 0 | 0 | 0 |
| 235 | 1 | 0 | 1 |
| 232 | 0 | 1 | 1 |
| 230 | 0 | 0 | 0 |
| 230 | 1 | 0 | 0 |
| 229 | 0 | 0 | 0 |
| 229 | 1 | 0 | 0 |
| 228 | 0 | 0 | 2 |

|     |   |   |   |
|-----|---|---|---|
| 225 | 1 | 0 | 2 |
| 224 | 0 | 0 | 0 |
| 223 | 0 | 0 | 2 |
| 223 | 1 | 0 | 4 |
| 223 | 2 | 0 | 1 |
| 220 | 2 | 0 | 1 |
| 221 | 4 | 0 | 3 |
| 219 | 0 | 0 | 0 |
| 212 | 0 | 0 | 0 |
| 207 | 0 | 0 | 1 |
| 207 | 1 | 0 | 0 |
| 204 | 1 | 0 | 1 |
| 204 | 0 | 0 | 1 |
| 199 | 0 | 0 | 0 |
| 198 | 1 | 0 | 2 |
| 198 | 0 | 1 | 5 |
| 197 | 0 | 0 | 2 |
| 196 | 0 | 1 | 3 |
| 196 | 0 | 0 | 2 |
| 195 | 0 | 0 | 3 |
| 194 | 0 | 0 | 0 |
| 189 | 1 | 0 | 2 |
| 185 | 0 | 0 | 1 |
| 182 | 2 | 0 | 2 |
| 182 | 2 | 0 | 2 |
| 176 | 1 | 0 | 0 |
| 176 | 4 | 0 | 0 |
| 171 | 0 | 0 | 0 |
| 172 | 0 | 0 | 0 |
| 168 | 0 | 0 | 1 |
| 166 | 0 | 0 | 0 |
| 164 | 1 | 0 | 0 |
| 163 | 1 | 0 | 1 |
| 162 | 0 | 0 | 1 |
| 162 | 0 | 0 | 0 |
| 161 | 0 | 0 | 2 |
| 160 | 0 | 0 | 0 |
| 157 | 0 | 0 | 0 |
| 155 | 0 | 0 | 1 |
| 152 | 1 | 0 | 0 |
| 152 | 0 | 0 | 1 |
| 151 | 0 | 0 | 4 |
| 149 | 1 | 0 | 1 |
| 148 | 0 | 0 | 1 |
| 149 | 0 | 0 | 1 |
| 147 | 1 | 0 | 1 |
| 146 | 0 | 0 | 1 |
| 144 | 0 | 0 | 1 |
| 143 | 0 | 0 | 0 |
| 143 | 0 | 0 | 1 |
| 142 | 0 | 0 | 0 |
| 141 | 1 | 0 | 2 |
| 141 | 0 | 0 | 1 |
| 140 | 2 | 0 | 0 |
| 138 | 0 | 0 | 0 |
| 137 | 0 | 0 | 1 |
| 137 | 0 | 0 | 3 |
| 135 | 1 | 0 | 1 |
| 134 | 0 | 0 | 0 |

|     |   |   |   |
|-----|---|---|---|
| 134 | 0 | 0 | 1 |
| 133 | 0 | 0 | 0 |
| 133 | 2 | 0 | 2 |
| 132 | 0 | 0 | 0 |
| 132 | 0 | 0 | 0 |
| 132 | 0 | 0 | 1 |
| 132 | 0 | 0 | 0 |
| 130 | 4 | 0 | 0 |
| 129 | 0 | 0 | 0 |
| 129 | 1 | 0 | 0 |
| 128 | 0 | 0 | 2 |
| 126 | 0 | 0 | 0 |
| 124 | 0 | 0 | 3 |
| 122 | 0 | 0 | 1 |
| 118 | 2 | 0 | 4 |
| 119 | 1 | 0 | 0 |
| 118 | 0 | 0 | 0 |
| 118 | 1 | 0 | 1 |
| 117 | 1 | 0 | 1 |
| 117 | 1 | 0 | 3 |
| 116 | 1 | 0 | 0 |
| 116 | 1 | 0 | 1 |
| 113 | 0 | 0 | 1 |
| 113 | 0 | 0 | 0 |
| 109 | 0 | 0 | 0 |
| 110 | 4 | 0 | 0 |
| 107 | 0 | 0 | 0 |
| 106 | 1 | 0 | 1 |
| 106 | 0 | 0 | 0 |
| 106 | 0 | 0 | 0 |
| 106 | 1 | 0 | 0 |
| 103 | 0 | 0 | 0 |
| 103 | 2 | 0 | 0 |
| 102 | 0 | 0 | 0 |
| 102 | 1 | 0 | 1 |
| 101 | 2 | 0 | 0 |
| 100 | 1 | 0 | 1 |
| 99  | 2 | 0 | 0 |

|                             |        |       |         |
|-----------------------------|--------|-------|---------|
| rand sampling numbers=      | 0.93   | 0.57  | 0.09    |
| 38                          | 3      | 13    | 26      |
| 95                          | 1      | 1     | 1       |
| index all samples:          | 1      | 2     | 3       |
| index type:                 | 1      | 2     | 3       |
| total of totals of =100:    | A_11   | A_16  | A_2     |
| 139587919                   | UC     | UC    | UC      |
| total all miRNA reads =100: | 479320 | 21319 | 1102300 |
| total all samples =100:     | UC     | UC    | UC      |
| 46389442                    | 253154 | 2382  | 397359  |
| 10497180                    | 9303   | 9512  | 44303   |
| 8994745                     | 18873  | 920   | 14220   |
| 8839402                     | 25490  | 1159  | 106715  |
| 8658137                     | 29662  | 380   | 50300   |

|         |       |     |       |
|---------|-------|-----|-------|
| 7939871 | 3705  | 835 | 68855 |
| 5953261 | 6768  | 639 | 39890 |
| 3762724 | 986   | 127 | 13562 |
| 3462453 | 5884  | 74  | 50176 |
| 3413660 | 17952 | 549 | 60322 |
| 2186845 | 12700 | 149 | 24235 |
| 2131733 | 9540  | 228 | 19335 |
| 1899491 | 3495  | 93  | 17356 |
| 1666971 | 12666 | 178 | 23277 |
| 1418336 | 613   | 120 | 10364 |
| 1093922 | 4504  | 10  | 3283  |
| 1034642 | 485   | 85  | 5773  |
| 1030775 | 3147  | 164 | 9946  |
| 979581  | 2840  | 117 | 8927  |
| 903691  | 4036  | 346 | 6751  |
| 738230  | 2679  | 37  | 4052  |
| 679306  | 3450  | 44  | 10712 |
| 664224  | 2212  | 10  | 2253  |
| 624773  | 1526  | 104 | 3905  |
| 614674  | 464   | 296 | 4671  |
| 605614  | 2756  | 13  | 4826  |
| 549148  | 2591  | 44  | 4258  |
| 501331  | 538   | 266 | 5655  |
| 500966  | 905   | 105 | 6388  |
| 497718  | 1676  | 24  | 2416  |
| 492626  | 1081  | 34  | 2754  |
| 463804  | 1154  | 24  | 5835  |
| 457362  | 543   | 12  | 2502  |
| 456843  | 546   | 19  | 660   |
| 454020  | 638   | 67  | 4333  |
| 436288  | 1372  | 96  | 7402  |
| 393199  | 1273  | 224 | 3273  |
| 339140  | 781   | 192 | 2198  |
| 313699  | 455   | 259 | 2413  |
| 312449  | 981   | 21  | 2657  |
| 286288  | 1281  | 84  | 967   |
| 270366  | 744   | 21  | 1168  |
| 261666  | 1162  | 66  | 2341  |
| 248983  | 60    | 70  | 1377  |
| 229733  | 1924  | 125 | 1897  |
| 221365  | 803   | 21  | 1544  |
| 209441  | 591   | 5   | 1275  |
| 198175  | 1039  | 6   | 1633  |
| 178962  | 45    | 2   | 406   |
| 177234  | 172   | 4   | 263   |
| 154285  | 1136  | 27  | 797   |
| 151875  | 278   | 15  | 679   |
| 143334  | 950   | 23  | 1106  |
| 138740  | 196   | 9   | 1627  |
| 137573  | 392   | 0   | 246   |
| 134502  | 90    | 0   | 190   |
| 127210  | 368   | 18  | 1773  |
| 125038  | 266   | 4   | 594   |
| 122415  | 661   | 20  | 820   |
| 115160  | 275   | 74  | 810   |
| 106297  | 669   | 18  | 481   |
| 102201  | 341   | 9   | 468   |
| 96743   | 24    | 5   | 189   |
| 94911   | 13    | 3   | 29    |

|       |      |     |      |
|-------|------|-----|------|
| 93386 | 399  | 14  | 966  |
| 87898 | 144  | 4   | 1248 |
| 82798 | 308  | 0   | 206  |
| 79678 | 55   | 9   | 720  |
| 78156 | 194  | 9   | 328  |
| 75744 | 51   | 260 | 1231 |
| 71988 | 740  | 5   | 223  |
| 70256 | 353  | 22  | 758  |
| 69114 | 40   | 11  | 417  |
| 68018 | 258  | 6   | 724  |
| 67482 | 126  | 2   | 371  |
| 67182 | 607  | 3   | 357  |
| 65049 | 238  | 2   | 427  |
| 56245 | 153  | 129 | 272  |
| 56410 | 155  | 3   | 227  |
| 53026 | 234  | 6   | 110  |
| 52323 | 135  | 8   | 859  |
| 51847 | 249  | 0   | 221  |
| 51252 | 63   | 33  | 438  |
| 50588 | 1073 | 0   | 55   |
| 49172 | 76   | 1   | 249  |
| 49098 | 317  | 0   | 137  |
| 48416 | 165  | 9   | 270  |
| 41318 | 12   | 4   | 271  |
| 40544 | 134  | 7   | 184  |
| 37943 | 99   | 5   | 228  |
| 36605 | 91   | 1   | 178  |
| 36676 | 9    | 0   | 14   |
| 32906 | 174  | 0   | 210  |
| 30537 | 50   | 1   | 186  |
| 29005 | 11   | 0   | 161  |
| 28163 | 32   | 6   | 170  |
| 28118 | 53   | 3   | 84   |
| 27350 | 112  | 6   | 140  |
| 27199 | 106  | 11  | 243  |
| 26769 | 8    | 0   | 98   |
| 26325 | 438  | 0   | 200  |
| 26241 | 37   | 0   | 171  |
| 26016 | 145  | 1   | 178  |
| 25811 | 36   | 40  | 236  |
| 25540 | 46   | 5   | 284  |
| 23949 | 24   | 2   | 155  |
| 23822 | 141  | 1   | 52   |
| 23449 | 58   | 10  | 122  |
| 23446 | 36   | 2   | 219  |
| 23397 | 26   | 1   | 180  |
| 23176 | 27   | 2   | 134  |
| 20718 | 111  | 3   | 158  |
| 20235 | 119  | 0   | 89   |
| 19721 | 25   | 0   | 290  |
| 18520 | 39   | 0   | 116  |
| 18147 | 76   | 5   | 208  |
| 16585 | 66   | 0   | 70   |
| 16186 | 28   | 1   | 71   |
| 16186 | 28   | 1   | 71   |
| 15369 | 95   | 2   | 106  |
| 15277 | 199  | 0   | 92   |
| 15261 | 72   | 0   | 73   |
| 14130 | 71   | 0   | 99   |

|       |     |   |     |
|-------|-----|---|-----|
| 13673 | 36  | 1 | 97  |
| 13338 | 1   | 0 | 5   |
| 12970 | 68  | 1 | 60  |
| 12358 | 62  | 0 | 85  |
| 12315 | 69  | 0 | 55  |
| 12195 | 30  | 3 | 58  |
| 11818 | 12  | 1 | 78  |
| 11405 | 9   | 6 | 151 |
| 11100 | 26  | 0 | 48  |
| 11007 | 25  | 1 | 62  |
| 10799 | 56  | 2 | 51  |
| 10674 | 67  | 0 | 75  |
| 10591 | 29  | 0 | 39  |
| 9795  | 15  | 0 | 72  |
| 9779  | 64  | 0 | 159 |
| 9597  | 16  | 2 | 93  |
| 9484  | 45  | 0 | 37  |
| 8988  | 36  | 0 | 65  |
| 9010  | 40  | 2 | 56  |
| 8799  | 48  | 0 | 38  |
| 8234  | 24  | 0 | 53  |
| 8112  | 3   | 0 | 9   |
| 7853  | 23  | 1 | 128 |
| 7857  | 26  | 0 | 60  |
| 7833  | 7   | 0 | 61  |
| 7337  | 24  | 3 | 76  |
| 7313  | 21  | 0 | 47  |
| 7188  | 10  | 0 | 16  |
| 7081  | 12  | 0 | 110 |
| 7031  | 41  | 0 | 49  |
| 6794  | 16  | 1 | 39  |
| 6526  | 78  | 0 | 19  |
| 6466  | 40  | 0 | 52  |
| 6415  | 9   | 4 | 71  |
| 6371  | 69  | 0 | 19  |
| 6235  | 63  | 1 | 43  |
| 6234  | 34  | 0 | 63  |
| 6205  | 1   | 0 | 6   |
| 6131  | 28  | 0 | 22  |
| 6075  | 9   | 0 | 18  |
| 6064  | 22  | 0 | 31  |
| 6037  | 7   | 1 | 18  |
| 5852  | 23  | 0 | 59  |
| 5791  | 20  | 2 | 43  |
| 5684  | 132 | 0 | 6   |
| 5638  | 6   | 0 | 11  |
| 5483  | 55  | 0 | 125 |
| 5462  | 21  | 0 | 25  |
| 5445  | 14  | 0 | 37  |
| 5410  | 23  | 0 | 41  |
| 5409  | 15  | 1 | 20  |
| 5404  | 3   | 0 | 15  |
| 5394  | 11  | 0 | 14  |
| 5376  | 96  | 0 | 19  |
| 5378  | 11  | 1 | 23  |
| 5198  | 67  | 0 | 45  |
| 4981  | 56  | 0 | 20  |
| 4906  | 13  | 2 | 65  |
| 4691  | 1   | 0 | 24  |

|      |    |   |    |
|------|----|---|----|
| 4664 | 93 | 1 | 21 |
| 4641 | 3  | 1 | 34 |
| 4449 | 22 | 1 | 13 |
| 4437 | 18 | 2 | 24 |
| 4439 | 1  | 0 | 22 |
| 4396 | 60 | 0 | 30 |
| 4359 | 11 | 1 | 16 |
| 4317 | 1  | 0 | 12 |
| 4227 | 31 | 0 | 0  |
| 4204 | 0  | 0 | 6  |
| 4173 | 12 | 1 | 15 |
| 4157 | 9  | 3 | 18 |
| 4113 | 20 | 1 | 41 |
| 3993 | 12 | 1 | 28 |
| 3954 | 4  | 0 | 2  |
| 3954 | 14 | 0 | 48 |
| 3836 | 30 | 0 | 20 |
| 3781 | 45 | 1 | 63 |
| 3706 | 3  | 0 | 11 |
| 3683 | 12 | 0 | 14 |
| 3618 | 23 | 0 | 21 |
| 3550 | 9  | 0 | 14 |
| 3607 | 0  | 0 | 29 |
| 3539 | 52 | 0 | 15 |
| 3527 | 12 | 0 | 28 |
| 3502 | 17 | 0 | 24 |
| 3467 | 13 | 1 | 36 |
| 3405 | 39 | 0 | 49 |
| 3388 | 12 | 0 | 25 |
| 3235 | 6  | 0 | 4  |
| 3139 | 1  | 0 | 18 |
| 3039 | 8  | 0 | 25 |
| 3036 | 18 | 0 | 8  |
| 3023 | 5  | 1 | 14 |
| 2999 | 1  | 0 | 8  |
| 2814 | 6  | 0 | 10 |
| 2792 | 0  | 0 | 1  |
| 2699 | 4  | 0 | 35 |
| 2607 | 0  | 2 | 17 |
| 2540 | 19 | 0 | 24 |
| 2500 | 21 | 0 | 30 |
| 2416 | 34 | 0 | 25 |
| 2275 | 12 | 0 | 22 |
| 2250 | 18 | 0 | 11 |
| 2236 | 7  | 0 | 23 |
| 2231 | 12 | 0 | 23 |
| 2207 | 7  | 0 | 13 |
| 2170 | 14 | 0 | 42 |
| 2146 | 4  | 0 | 10 |
| 2119 | 4  | 0 | 20 |
| 2114 | 2  | 0 | 5  |
| 2033 | 15 | 1 | 10 |
| 2009 | 2  | 0 | 14 |
| 1957 | 19 | 0 | 23 |
| 1952 | 10 | 0 | 11 |
| 1926 | 3  | 0 | 1  |
| 1890 | 1  | 0 | 12 |
| 1888 | 7  | 0 | 19 |
| 1866 | 21 | 0 | 5  |



|      |    |   |    |
|------|----|---|----|
| 1862 | 15 | 0 | 6  |
| 1854 | 2  | 1 | 16 |
| 1843 | 10 | 1 | 13 |
| 1843 | 10 | 1 | 13 |
| 1750 | 19 | 0 | 6  |
| 1719 | 2  | 0 | 15 |
| 1715 | 2  | 0 | 29 |
| 1709 | 10 | 0 | 3  |
| 1707 | 1  | 0 | 12 |
| 1690 | 5  | 0 | 11 |
| 1641 | 3  | 0 | 12 |
| 1619 | 6  | 1 | 17 |
| 1607 | 6  | 0 | 5  |
| 1586 | 1  | 0 | 1  |
| 1585 | 2  | 1 | 22 |
| 1577 | 6  | 0 | 9  |
| 1576 | 11 | 0 | 30 |
| 1567 | 0  | 0 | 1  |
| 1552 | 7  | 0 | 18 |
| 1548 | 2  | 0 | 10 |
| 1507 | 3  | 0 | 7  |
| 1463 | 6  | 0 | 13 |
| 1443 | 2  | 0 | 10 |
| 1383 | 13 | 0 | 5  |
| 1382 | 7  | 0 | 7  |
| 1377 | 11 | 0 | 7  |
| 1351 | 10 | 0 | 15 |
| 1322 | 0  | 0 | 0  |
| 1307 | 7  | 0 | 5  |
| 1250 | 3  | 0 | 16 |
| 1237 | 2  | 0 | 14 |
| 1239 | 7  | 0 | 7  |
| 1226 | 4  | 0 | 12 |
| 1221 | 0  | 0 | 0  |
| 1216 | 8  | 1 | 19 |
| 1214 | 2  | 0 | 5  |
| 1209 | 5  | 0 | 3  |
| 1206 | 7  | 0 | 4  |
| 1161 | 8  | 1 | 8  |
| 1134 | 3  | 0 | 3  |
| 1131 | 16 | 0 | 2  |
| 1126 | 4  | 1 | 6  |
| 1118 | 10 | 0 | 3  |
| 1109 | 4  | 0 | 4  |
| 1104 | 3  | 0 | 5  |
| 1074 | 5  | 0 | 6  |
| 1072 | 2  | 0 | 5  |
| 1064 | 25 | 0 | 3  |
| 1052 | 0  | 1 | 3  |
| 1051 | 1  | 0 | 5  |
| 1047 | 0  | 0 | 4  |
| 1037 | 5  | 0 | 3  |
| 1038 | 6  | 1 | 6  |
| 1026 | 5  | 0 | 0  |
| 998  | 13 | 0 | 3  |
| 1001 | 2  | 0 | 7  |
| 997  | 0  | 0 | 25 |
| 973  | 4  | 0 | 7  |
| 960  | 19 | 0 | 5  |

|     |    |   |    |
|-----|----|---|----|
| 949 | 9  | 0 | 5  |
| 942 | 4  | 0 | 4  |
| 930 | 3  | 0 | 10 |
| 925 | 5  | 0 | 4  |
| 917 | 11 | 0 | 13 |
| 897 | 1  | 0 | 4  |
| 887 | 0  | 0 | 8  |
| 872 | 11 | 0 | 3  |
| 858 | 6  | 0 | 8  |
| 818 | 0  | 0 | 8  |
| 805 | 0  | 0 | 0  |
| 794 | 3  | 0 | 9  |
| 795 | 0  | 0 | 2  |
| 794 | 0  | 0 | 3  |
| 789 | 1  | 2 | 8  |
| 782 | 3  | 0 | 14 |
| 771 | 4  | 0 | 6  |
| 768 | 7  | 0 | 4  |
| 761 | 9  | 0 | 7  |
| 741 | 7  | 0 | 1  |
| 739 | 0  | 0 | 3  |
| 733 | 2  | 0 | 2  |
| 718 | 1  | 0 | 7  |
| 709 | 7  | 0 | 3  |
| 705 | 0  | 0 | 3  |
| 701 | 7  | 0 | 2  |
| 697 | 12 | 0 | 0  |
| 683 | 6  | 0 | 7  |
| 656 | 1  | 1 | 11 |
| 657 | 6  | 1 | 5  |
| 646 | 1  | 0 | 7  |
| 640 | 2  | 0 | 4  |
| 639 | 3  | 0 | 1  |
| 639 | 0  | 0 | 2  |
| 637 | 0  | 0 | 3  |
| 629 | 0  | 0 | 3  |
| 628 | 2  | 0 | 0  |
| 624 | 1  | 0 | 1  |
| 603 | 2  | 1 | 0  |
| 600 | 8  | 0 | 11 |
| 594 | 1  | 0 | 13 |
| 600 | 4  | 0 | 5  |
| 591 | 4  | 0 | 3  |
| 591 | 2  | 0 | 1  |
| 572 | 0  | 0 | 2  |
| 571 | 0  | 0 | 1  |
| 566 | 6  | 0 | 4  |
| 564 | 2  | 0 | 3  |
| 552 | 3  | 0 | 8  |
| 544 | 0  | 0 | 1  |
| 544 | 3  | 0 | 3  |
| 528 | 1  | 0 | 2  |
| 525 | 2  | 0 | 20 |
| 521 | 0  | 0 | 1  |
| 518 | 1  | 0 | 4  |
| 511 | 4  | 0 | 6  |
| 495 | 1  | 0 | 0  |
| 471 | 8  | 0 | 2  |
| 463 | 1  | 0 | 2  |

|     |   |   |   |
|-----|---|---|---|
| 463 | 3 | 0 | 2 |
| 454 | 1 | 0 | 0 |
| 450 | 3 | 0 | 1 |
| 443 | 0 | 0 | 6 |
| 440 | 1 | 0 | 5 |
| 438 | 3 | 0 | 2 |
| 434 | 3 | 0 | 6 |
| 427 | 0 | 0 | 0 |
| 418 | 0 | 0 | 0 |
| 408 | 2 | 0 | 7 |
| 394 | 1 | 0 | 6 |
| 394 | 2 | 1 | 3 |
| 383 | 1 | 0 | 1 |
| 374 | 1 | 0 | 2 |
| 374 | 0 | 0 | 1 |
| 371 | 2 | 0 | 1 |
| 370 | 3 | 0 | 3 |
| 356 | 0 | 0 | 1 |
| 354 | 0 | 0 | 2 |
| 352 | 5 | 0 | 1 |
| 352 | 0 | 0 | 1 |
| 351 | 0 | 0 | 3 |
| 349 | 6 | 0 | 2 |
| 348 | 6 | 0 | 4 |
| 335 | 2 | 0 | 1 |
| 330 | 0 | 0 | 3 |
| 328 | 2 | 0 | 0 |
| 328 | 0 | 0 | 3 |
| 321 | 0 | 0 | 2 |
| 320 | 0 | 0 | 1 |
| 319 | 2 | 0 | 0 |
| 318 | 3 | 0 | 4 |
| 317 | 3 | 0 | 2 |
| 313 | 1 | 0 | 5 |
| 311 | 2 | 0 | 0 |
| 311 | 1 | 0 | 4 |
| 308 | 1 | 0 | 3 |
| 308 | 0 | 0 | 1 |
| 307 | 3 | 0 | 4 |
| 302 | 0 | 1 | 0 |
| 296 | 0 | 0 | 1 |
| 294 | 2 | 0 | 0 |
| 286 | 0 | 0 | 5 |
| 285 | 1 | 0 | 1 |
| 285 | 3 | 1 | 1 |
| 280 | 1 | 0 | 1 |
| 280 | 1 | 0 | 0 |
| 279 | 0 | 0 | 1 |
| 278 | 1 | 1 | 3 |
| 275 | 3 | 0 | 2 |
| 275 | 0 | 0 | 2 |
| 272 | 0 | 0 | 0 |
| 273 | 0 | 0 | 0 |
| 269 | 1 | 0 | 1 |
| 266 | 4 | 0 | 1 |
| 258 | 1 | 0 | 1 |
| 257 | 2 | 0 | 2 |
| 246 | 4 | 0 | 1 |
| 246 | 0 | 0 | 0 |

|     |   |   |   |
|-----|---|---|---|
| 246 | 1 | 0 | 0 |
| 245 | 3 | 0 | 1 |
| 244 | 0 | 0 | 2 |
| 241 | 2 | 0 | 2 |
| 241 | 1 | 0 | 1 |
| 237 | 4 | 0 | 1 |
| 236 | 0 | 0 | 0 |
| 235 | 1 | 0 | 1 |
| 232 | 0 | 1 | 1 |
| 230 | 0 | 0 | 0 |
| 230 | 1 | 0 | 0 |
| 229 | 0 | 0 | 0 |
| 229 | 1 | 0 | 0 |
| 228 | 0 | 0 | 2 |
| 225 | 1 | 0 | 2 |
| 224 | 0 | 0 | 0 |
| 223 | 0 | 0 | 2 |
| 223 | 1 | 0 | 4 |
| 223 | 2 | 0 | 1 |
| 220 | 2 | 0 | 1 |
| 221 | 4 | 0 | 3 |
| 219 | 0 | 0 | 0 |
| 212 | 0 | 0 | 0 |
| 207 | 0 | 0 | 1 |
| 207 | 1 | 0 | 0 |
| 204 | 1 | 0 | 1 |
| 204 | 0 | 0 | 1 |
| 199 | 0 | 0 | 0 |
| 198 | 1 | 0 | 2 |
| 198 | 0 | 1 | 5 |
| 197 | 0 | 0 | 2 |
| 196 | 0 | 1 | 3 |
| 196 | 0 | 0 | 2 |
| 195 | 0 | 0 | 3 |
| 194 | 0 | 0 | 0 |
| 189 | 1 | 0 | 2 |
| 185 | 0 | 0 | 1 |
| 182 | 2 | 0 | 2 |
| 182 | 2 | 0 | 2 |
| 176 | 1 | 0 | 0 |
| 176 | 4 | 0 | 0 |
| 171 | 0 | 0 | 0 |
| 172 | 0 | 0 | 0 |
| 168 | 0 | 0 | 1 |
| 166 | 0 | 0 | 0 |
| 164 | 1 | 0 | 0 |
| 163 | 1 | 0 | 1 |
| 162 | 0 | 0 | 1 |
| 162 | 0 | 0 | 0 |
| 161 | 0 | 0 | 2 |
| 160 | 0 | 0 | 0 |
| 157 | 0 | 0 | 0 |
| 155 | 0 | 0 | 1 |
| 152 | 1 | 0 | 0 |
| 152 | 0 | 0 | 1 |
| 151 | 0 | 0 | 4 |
| 149 | 1 | 0 | 1 |
| 148 | 0 | 0 | 1 |
| 149 | 0 | 0 | 1 |

|                                |       |      |       |
|--------------------------------|-------|------|-------|
| 147                            | 1     | 0    | 1     |
| 146                            | 0     | 0    | 1     |
| 144                            | 0     | 0    | 1     |
| 143                            | 0     | 0    | 0     |
| 143                            | 0     | 0    | 1     |
| 142                            | 0     | 0    | 0     |
| 141                            | 1     | 0    | 2     |
| 141                            | 0     | 0    | 1     |
| 140                            | 2     | 0    | 0     |
| 138                            | 0     | 0    | 0     |
| 137                            | 0     | 0    | 1     |
| 137                            | 0     | 0    | 3     |
| 135                            | 1     | 0    | 1     |
| 134                            | 0     | 0    | 0     |
| 134                            | 0     | 0    | 1     |
| 133                            | 0     | 0    | 0     |
| 133                            | 2     | 0    | 2     |
| 132                            | 0     | 0    | 0     |
| 132                            | 0     | 0    | 0     |
| 132                            | 0     | 0    | 1     |
| 132                            | 0     | 0    | 0     |
| 130                            | 4     | 0    | 0     |
| 129                            | 0     | 0    | 0     |
| 129                            | 1     | 0    | 0     |
| 128                            | 0     | 0    | 2     |
| 126                            | 0     | 0    | 0     |
| 124                            | 0     | 0    | 3     |
| 122                            | 0     | 0    | 1     |
| 118                            | 2     | 0    | 4     |
| 119                            | 1     | 0    | 0     |
| 118                            | 0     | 0    | 0     |
| 118                            | 1     | 0    | 1     |
| 117                            | 1     | 0    | 1     |
| 117                            | 1     | 0    | 3     |
| 116                            | 1     | 0    | 0     |
| 116                            | 1     | 0    | 1     |
| 113                            | 0     | 0    | 1     |
| 113                            | 0     | 0    | 0     |
| 109                            | 0     | 0    | 0     |
| 110                            | 4     | 0    | 0     |
| 107                            | 0     | 0    | 0     |
| 106                            | 1     | 0    | 1     |
| 106                            | 0     | 0    | 0     |
| 106                            | 0     | 0    | 0     |
| 106                            | 1     | 0    | 0     |
| 103                            | 0     | 0    | 0     |
| 103                            | 2     | 0    | 0     |
| 102                            | 0     | 0    | 0     |
| 102                            | 1     | 0    | 1     |
| 101                            | 2     | 0    | 0     |
| 100                            | 1     | 0    | 1     |
| 99                             | 2     | 0    | 0     |
| ave top 30                     | 14820 | 634  | 34136 |
| sd top 30                      | 45642 | 1745 | 72911 |
| total reads <= 100 in all miRs | 441   | 503  | 414   |
|                                | UC    | UC   | UC    |
|                                | UC    | UC   | UC    |

|                             |        |       |         |
|-----------------------------|--------|-------|---------|
| index all samples:          | 1      | 2     | 3       |
| index type:                 | 1      | 2     | 3       |
| total of totals of =100:    | UC     | UC    | UC      |
| 139641984                   | A_11   | A_16  | A_2     |
| total all miRNA reads =100: | 479320 | 21319 | 1102300 |
| total all samples =100:     | UC     | UC    | UC      |
| 46389442                    | 17.08  | 3.76  | 11.64   |
| 10497180                    | 0.63   | 15.01 | 1.30    |
| 8994745                     | 1.27   | 1.45  | 0.42    |
| 8839402                     | 1.72   | 1.83  | 3.13    |
| 8658137                     | 2.00   | 0.60  | 1.47    |
| 7939871                     | 0.25   | 1.32  | 2.02    |
| 5953261                     | 0.46   | 1.01  | 1.17    |
| 3762724                     | 0.07   | 0.20  | 0.40    |
| 3462453                     | 0.40   | 0.12  | 1.47    |
| 3413660                     | 1.21   | 0.87  | 1.77    |
| 2186845                     | 0.86   | 0.24  | 0.71    |
| 2131733                     | 0.64   | 0.36  | 0.57    |
| 1899491                     | 0.24   | 0.15  | 0.51    |
| 1666971                     | 0.85   | 0.28  | 0.68    |
| 1418336                     | 0.04   | 0.19  | 0.30    |
| 1093922                     | 0.30   | 0.02  | 0.10    |
| 1034642                     | 0.03   | 0.13  | 0.17    |
| 1030775                     | 0.21   | 0.26  | 0.29    |
| 979581                      | 0.19   | 0.18  | 0.26    |
| 903691                      | 0.27   | 0.55  | 0.20    |
| 738230                      | 0.18   | 0.06  | 0.12    |
| 679306                      | 0.23   | 0.07  | 0.31    |
| 664224                      | 0.15   | 0.02  | 0.07    |
| 624773                      | 0.10   | 0.16  | 0.11    |
| 614674                      | 0.03   | 0.47  | 0.14    |
| 605614                      | 0.19   | 0.02  | 0.14    |
| 549148                      | 0.17   | 0.07  | 0.12    |
| 501331                      | 0.04   | 0.42  | 0.17    |
| 500966                      | 0.06   | 0.17  | 0.19    |
| 497718                      | 0.11   | 0.04  | 0.07    |
| 492626                      | 0.07   | 0.05  | 0.08    |
| 463804                      | 0.08   | 0.04  | 0.17    |
| 457362                      | 0.04   | 0.02  | 0.07    |
| 456843                      | 0.04   | 0.03  | 0.02    |
| 454020                      | 0.04   | 0.11  | 0.13    |
| 436288                      | 0.09   | 0.15  | 0.22    |
| 393199                      | 0.09   | 0.35  | 0.10    |
| 339140                      | 0.05   | 0.30  | 0.06    |
| 313699                      | 0.03   | 0.41  | 0.07    |
| 312449                      | 0.07   | 0.03  | 0.08    |
| 286288                      | 0.09   | 0.13  | 0.03    |
| 270366                      | 0.05   | 0.03  | 0.03    |
| 261666                      | 0.08   | 0.10  | 0.07    |
| 248983                      | 0.00   | 0.11  | 0.04    |
| 229733                      | 0.13   | 0.20  | 0.06    |
| 221365                      | 0.05   | 0.03  | 0.05    |
| 209441                      | 0.04   | 0.01  | 0.04    |
| 198175                      | 0.07   | 0.01  | 0.05    |
| 178962                      | 0.00   | 0.00  | 0.01    |
| 177234                      | 0.01   | 0.01  | 0.01    |
| 154285                      | 0.08   | 0.04  | 0.02    |
| 151875                      | 0.02   | 0.02  | 0.02    |

|        |      |      |      |
|--------|------|------|------|
| 143334 | 0.06 | 0.04 | 0.03 |
| 138740 | 0.01 | 0.01 | 0.05 |
| 137573 | 0.03 | 0.00 | 0.01 |
| 134502 | 0.01 | 0.00 | 0.01 |
| 127210 | 0.02 | 0.03 | 0.05 |
| 125038 | 0.02 | 0.01 | 0.02 |
| 122415 | 0.04 | 0.03 | 0.02 |
| 115160 | 0.02 | 0.12 | 0.02 |
| 106297 | 0.05 | 0.03 | 0.01 |
| 102201 | 0.02 | 0.01 | 0.01 |
| 96743  | 0.00 | 0.01 | 0.01 |
| 94911  | 0.00 | 0.00 | 0.00 |
| 93386  | 0.03 | 0.02 | 0.03 |
| 87898  | 0.01 | 0.01 | 0.04 |
| 82798  | 0.02 | 0.00 | 0.01 |
| 79678  | 0.00 | 0.01 | 0.02 |
| 78156  | 0.01 | 0.01 | 0.01 |
| 75744  | 0.00 | 0.41 | 0.04 |
| 71988  | 0.05 | 0.01 | 0.01 |
| 70256  | 0.02 | 0.03 | 0.02 |
| 69114  | 0.00 | 0.02 | 0.01 |
| 68018  | 0.02 | 0.01 | 0.02 |
| 67482  | 0.01 | 0.00 | 0.01 |
| 67182  | 0.04 | 0.00 | 0.01 |
| 65049  | 0.02 | 0.00 | 0.01 |
| 56245  | 0.01 | 0.20 | 0.01 |
| 56410  | 0.01 | 0.00 | 0.01 |
| 53026  | 0.02 | 0.01 | 0.00 |
| 52323  | 0.01 | 0.01 | 0.03 |
| 51847  | 0.02 | 0.00 | 0.01 |
| 51252  | 0.00 | 0.05 | 0.01 |
| 50588  | 0.07 | 0.00 | 0.00 |
| 49172  | 0.01 | 0.00 | 0.01 |
| 49098  | 0.02 | 0.00 | 0.00 |
| 48416  | 0.01 | 0.01 | 0.01 |
| 41318  | 0.00 | 0.01 | 0.01 |
| 40544  | 0.01 | 0.01 | 0.01 |
| 37943  | 0.01 | 0.01 | 0.01 |
| 36605  | 0.01 | 0.00 | 0.01 |
| 36676  | 0.00 | 0.00 | 0.00 |
| 32906  | 0.01 | 0.00 | 0.01 |
| 30537  | 0.00 | 0.00 | 0.01 |
| 29005  | 0.00 | 0.00 | 0.00 |
| 28163  | 0.00 | 0.01 | 0.00 |
| 28118  | 0.00 | 0.00 | 0.00 |
| 27350  | 0.01 | 0.01 | 0.00 |
| 27199  | 0.01 | 0.02 | 0.01 |
| 26769  | 0.00 | 0.00 | 0.00 |
| 26325  | 0.03 | 0.00 | 0.01 |
| 26241  | 0.00 | 0.00 | 0.01 |
| 26016  | 0.01 | 0.00 | 0.01 |
| 25811  | 0.00 | 0.06 | 0.01 |
| 25540  | 0.00 | 0.01 | 0.01 |
| 23949  | 0.00 | 0.00 | 0.00 |
| 23822  | 0.01 | 0.00 | 0.00 |
| 23449  | 0.00 | 0.02 | 0.00 |
| 23446  | 0.00 | 0.00 | 0.01 |
| 23397  | 0.00 | 0.00 | 0.01 |
| 23176  | 0.00 | 0.00 | 0.00 |

|       |      |      |      |
|-------|------|------|------|
| 20718 | 0.01 | 0.00 | 0.00 |
| 20235 | 0.01 | 0.00 | 0.00 |
| 19721 | 0.00 | 0.00 | 0.01 |
| 18520 | 0.00 | 0.00 | 0.00 |
| 18147 | 0.01 | 0.01 | 0.01 |
| 16585 | 0.00 | 0.00 | 0.00 |
| 16186 | 0.00 | 0.00 | 0.00 |
| 16186 | 0.00 | 0.00 | 0.00 |
| 15369 | 0.01 | 0.00 | 0.00 |
| 15277 | 0.01 | 0.00 | 0.00 |
| 15261 | 0.00 | 0.00 | 0.00 |
| 14130 | 0.00 | 0.00 | 0.00 |
| 13673 | 0.00 | 0.00 | 0.00 |
| 13338 | 0.00 | 0.00 | 0.00 |
| 12970 | 0.00 | 0.00 | 0.00 |
| 12358 | 0.00 | 0.00 | 0.00 |
| 12315 | 0.00 | 0.00 | 0.00 |
| 12195 | 0.00 | 0.00 | 0.00 |
| 11818 | 0.00 | 0.00 | 0.00 |
| 11405 | 0.00 | 0.01 | 0.00 |
| 11100 | 0.00 | 0.00 | 0.00 |
| 11007 | 0.00 | 0.00 | 0.00 |
| 10799 | 0.00 | 0.00 | 0.00 |
| 10674 | 0.00 | 0.00 | 0.00 |
| 10591 | 0.00 | 0.00 | 0.00 |
| 9795  | 0.00 | 0.00 | 0.00 |
| 9779  | 0.00 | 0.00 | 0.00 |
| 9597  | 0.00 | 0.00 | 0.00 |
| 9484  | 0.00 | 0.00 | 0.00 |
| 8988  | 0.00 | 0.00 | 0.00 |
| 9010  | 0.00 | 0.00 | 0.00 |
| 8799  | 0.00 | 0.00 | 0.00 |
| 8234  | 0.00 | 0.00 | 0.00 |
| 8112  | 0.00 | 0.00 | 0.00 |
| 7853  | 0.00 | 0.00 | 0.00 |
| 7857  | 0.00 | 0.00 | 0.00 |
| 7833  | 0.00 | 0.00 | 0.00 |
| 7337  | 0.00 | 0.00 | 0.00 |
| 7313  | 0.00 | 0.00 | 0.00 |
| 7188  | 0.00 | 0.00 | 0.00 |
| 7081  | 0.00 | 0.00 | 0.00 |
| 7031  | 0.00 | 0.00 | 0.00 |
| 6794  | 0.00 | 0.00 | 0.00 |
| 6526  | 0.01 | 0.00 | 0.00 |
| 6466  | 0.00 | 0.00 | 0.00 |
| 6415  | 0.00 | 0.01 | 0.00 |
| 6371  | 0.00 | 0.00 | 0.00 |
| 6235  | 0.00 | 0.00 | 0.00 |
| 6234  | 0.00 | 0.00 | 0.00 |
| 6205  | 0.00 | 0.00 | 0.00 |
| 6131  | 0.00 | 0.00 | 0.00 |
| 6075  | 0.00 | 0.00 | 0.00 |
| 6064  | 0.00 | 0.00 | 0.00 |
| 6037  | 0.00 | 0.00 | 0.00 |
| 5852  | 0.00 | 0.00 | 0.00 |
| 5791  | 0.00 | 0.00 | 0.00 |
| 5684  | 0.01 | 0.00 | 0.00 |
| 5638  | 0.00 | 0.00 | 0.00 |
| 5483  | 0.00 | 0.00 | 0.00 |



|      |      |      |      |
|------|------|------|------|
| 5462 | 0.00 | 0.00 | 0.00 |
| 5445 | 0.00 | 0.00 | 0.00 |
| 5410 | 0.00 | 0.00 | 0.00 |
| 5409 | 0.00 | 0.00 | 0.00 |
| 5404 | 0.00 | 0.00 | 0.00 |
| 5394 | 0.00 | 0.00 | 0.00 |
| 5376 | 0.01 | 0.00 | 0.00 |
| 5378 | 0.00 | 0.00 | 0.00 |
| 5198 | 0.00 | 0.00 | 0.00 |
| 4981 | 0.00 | 0.00 | 0.00 |
| 4906 | 0.00 | 0.00 | 0.00 |
| 4691 | 0.00 | 0.00 | 0.00 |
| 4664 | 0.01 | 0.00 | 0.00 |
| 4641 | 0.00 | 0.00 | 0.00 |
| 4449 | 0.00 | 0.00 | 0.00 |
| 4437 | 0.00 | 0.00 | 0.00 |
| 4439 | 0.00 | 0.00 | 0.00 |
| 4396 | 0.00 | 0.00 | 0.00 |
| 4359 | 0.00 | 0.00 | 0.00 |
| 4317 | 0.00 | 0.00 | 0.00 |
| 4227 | 0.00 | 0.00 | 0.00 |
| 4204 | 0.00 | 0.00 | 0.00 |
| 4173 | 0.00 | 0.00 | 0.00 |
| 4157 | 0.00 | 0.00 | 0.00 |
| 4113 | 0.00 | 0.00 | 0.00 |
| 3993 | 0.00 | 0.00 | 0.00 |
| 3954 | 0.00 | 0.00 | 0.00 |
| 3954 | 0.00 | 0.00 | 0.00 |
| 3836 | 0.00 | 0.00 | 0.00 |
| 3781 | 0.00 | 0.00 | 0.00 |
| 3706 | 0.00 | 0.00 | 0.00 |
| 3683 | 0.00 | 0.00 | 0.00 |
| 3618 | 0.00 | 0.00 | 0.00 |
| 3550 | 0.00 | 0.00 | 0.00 |
| 3607 | 0.00 | 0.00 | 0.00 |
| 3539 | 0.00 | 0.00 | 0.00 |
| 3527 | 0.00 | 0.00 | 0.00 |
| 3502 | 0.00 | 0.00 | 0.00 |
| 3467 | 0.00 | 0.00 | 0.00 |
| 3405 | 0.00 | 0.00 | 0.00 |
| 3388 | 0.00 | 0.00 | 0.00 |
| 3235 | 0.00 | 0.00 | 0.00 |
| 3139 | 0.00 | 0.00 | 0.00 |
| 3039 | 0.00 | 0.00 | 0.00 |
| 3036 | 0.00 | 0.00 | 0.00 |
| 3023 | 0.00 | 0.00 | 0.00 |
| 2999 | 0.00 | 0.00 | 0.00 |
| 2814 | 0.00 | 0.00 | 0.00 |
| 2792 | 0.00 | 0.00 | 0.00 |
| 2699 | 0.00 | 0.00 | 0.00 |
| 2607 | 0.00 | 0.00 | 0.00 |
| 2540 | 0.00 | 0.00 | 0.00 |
| 2500 | 0.00 | 0.00 | 0.00 |
| 2416 | 0.00 | 0.00 | 0.00 |
| 2275 | 0.00 | 0.00 | 0.00 |
| 2250 | 0.00 | 0.00 | 0.00 |
| 2236 | 0.00 | 0.00 | 0.00 |
| 2231 | 0.00 | 0.00 | 0.00 |
| 2207 | 0.00 | 0.00 | 0.00 |

|      |      |      |      |
|------|------|------|------|
| 2170 | 0.00 | 0.00 | 0.00 |
| 2146 | 0.00 | 0.00 | 0.00 |
| 2119 | 0.00 | 0.00 | 0.00 |
| 2114 | 0.00 | 0.00 | 0.00 |
| 2033 | 0.00 | 0.00 | 0.00 |
| 2009 | 0.00 | 0.00 | 0.00 |
| 1957 | 0.00 | 0.00 | 0.00 |
| 1952 | 0.00 | 0.00 | 0.00 |
| 1926 | 0.00 | 0.00 | 0.00 |
| 1890 | 0.00 | 0.00 | 0.00 |
| 1888 | 0.00 | 0.00 | 0.00 |
| 1866 | 0.00 | 0.00 | 0.00 |
| 1862 | 0.00 | 0.00 | 0.00 |
| 1854 | 0.00 | 0.00 | 0.00 |
| 1843 | 0.00 | 0.00 | 0.00 |
| 1843 | 0.00 | 0.00 | 0.00 |
| 1750 | 0.00 | 0.00 | 0.00 |
| 1719 | 0.00 | 0.00 | 0.00 |
| 1715 | 0.00 | 0.00 | 0.00 |
| 1709 | 0.00 | 0.00 | 0.00 |
| 1707 | 0.00 | 0.00 | 0.00 |
| 1690 | 0.00 | 0.00 | 0.00 |
| 1641 | 0.00 | 0.00 | 0.00 |
| 1619 | 0.00 | 0.00 | 0.00 |
| 1607 | 0.00 | 0.00 | 0.00 |
| 1586 | 0.00 | 0.00 | 0.00 |
| 1585 | 0.00 | 0.00 | 0.00 |
| 1577 | 0.00 | 0.00 | 0.00 |
| 1576 | 0.00 | 0.00 | 0.00 |
| 1567 | 0.00 | 0.00 | 0.00 |

35 samples:

```
max 30 miRs:
2
min 30 miRs:
2
```

|                             | 1      | 2     | 3       |
|-----------------------------|--------|-------|---------|
| 97                          |        |       |         |
| index type:                 | 1      | 2     | 3       |
| total of totals of =100:    | UC     | UC    | UC      |
| 139641984                   | A_11   | A_16  | A_2     |
| total all miRNA reads =100: | 479320 | 21319 | 1102300 |
| total all samples =100:     | A_11   | A_16  | A_2     |
| 46389442                    | 1.23   | -1.76 | 0.00    |
| 10497180                    | -0.77  | 3.44  | -0.58   |
| 8994745                     | -0.63  | -0.49 | -1.27   |
| 8839402                     | -0.72  | -0.61 | 0.67    |
| 8658137                     | -0.18  | -1.73 | -0.76   |
| 7939871                     | -0.85  | 0.11  | 0.75    |
| 5953261                     | -1.13  | -0.25 | 0.00    |
| 3762724                     | -0.50  | -0.26 | 0.10    |

|         |       |       |       |
|---------|-------|-------|-------|
| 3462453 | -0.38 | -0.94 | 1.75  |
| 3413660 | 1.16  | 0.27  | 2.58  |
| 2186845 | 1.45  | -0.89 | 0.90  |
| 2131733 | 1.36  | -1.18 | 0.67  |
| 1899491 | -0.70 | -1.21 | 0.87  |
| 1666971 | 2.23  | -1.07 | 1.24  |
| 1418336 | -0.82 | -0.14 | 0.39  |
| 1093922 | 0.03  | -1.22 | -0.87 |
| 1034642 | -0.79 | -0.15 | 0.07  |
| 1030775 | -0.02 | 0.44  | 0.76  |
| 979581  | 0.09  | 0.03  | 0.71  |
| 903691  | 0.42  | 3.14  | -0.33 |
| 738230  | 0.38  | -1.59 | -0.62 |
| 679306  | 1.24  | -1.25 | 2.48  |
| 664224  | 0.38  | -1.27 | -0.65 |
| 624773  | -0.15 | 0.42  | -0.05 |
| 614674  | -0.58 | 2.00  | 0.04  |
| 605614  | 1.34  | -1.78 | 0.50  |
| 549148  | 0.58  | -1.10 | -0.21 |
| 501331  | -0.73 | 2.95  | 0.51  |
| 500966  | -0.90 | 1.14  | 1.56  |
| 497718  | 0.26  | -1.50 | -0.73 |
| 492626  | -0.41 | -0.86 | -0.23 |
| 463804  | -0.85 | -1.63 | 0.95  |
| 457362  | -0.35 | -0.61 | 0.21  |
| 456843  | -0.20 | -0.24 | -0.29 |
| 454020  | -1.15 | 0.25  | 0.73  |
| 436288  | -0.31 | 0.05  | 0.45  |
| 393199  | -0.32 | 2.84  | -0.21 |
| 339140  | -0.41 | 2.17  | -0.29 |
| 313699  | -0.82 | 3.71  | -0.35 |
| 312449  | -0.27 | -0.54 | -0.18 |
| 286288  | 0.21  | 1.16  | -0.97 |
| 270366  | -0.55 | -1.07 | -1.03 |
| 261666  | 0.57  | 1.61  | 0.17  |
| 248983  | -0.83 | 1.81  | 0.07  |
| 229733  | 1.43  | 2.87  | -0.15 |
| 221365  | 0.56  | -0.96 | -0.09 |
| 209441  | -0.04 | -1.33 | -0.14 |
| 198175  | 0.68  | -1.33 | -0.06 |
| 178962  | -0.29 | -0.29 | 0.02  |
| 177234  | -0.43 | -0.55 | -0.51 |
| 154285  | 2.23  | 0.39  | -0.65 |
| 151875  | -0.46 | -0.31 | -0.42 |
| 143334  | 2.20  | 0.05  | -0.25 |
| 138740  | -0.84 | -0.78 | 0.98  |
| 137573  | 0.08  | -1.38 | -0.98 |

|        |       |       |       |
|--------|-------|-------|-------|
| 134502 | -0.13 | -0.38 | -0.16 |
| 127210 | -0.26 | 0.03  | 1.92  |
| 125038 | -0.50 | -1.47 | -0.55 |
| 122415 | 1.04  | 0.07  | -0.49 |
| 115160 | -0.59 | 2.00  | -0.45 |
| 106297 | 1.65  | 0.31  | -0.84 |
| 102201 | 0.08  | -0.65 | -0.69 |
| 96743  | -0.60 | -0.11 | -0.29 |
| 94911  | -0.26 | -0.08 | -0.26 |
| 93386  | -0.14 | -0.42 | -0.06 |
| 87898  | -0.65 | -0.98 | 1.93  |
| 82798  | 0.64  | -0.89 | -0.45 |
| 79678  | -0.66 | 0.38  | 1.06  |
| 78156  | 0.04  | 0.17  | -0.36 |
| 75744  | -0.38 | 4.86  | 0.04  |
| 71988  | 2.00  | -0.96 | -1.06 |
| 70256  | 0.34  | 1.41  | 0.18  |
| 69114  | -0.69 | 0.68  | 0.20  |
| 68018  | 0.47  | -0.58 | 0.97  |
| 67482  | -0.31 | -0.98 | -0.02 |
| 67182  | 1.96  | -1.03 | -0.56 |
| 65049  | 0.19  | -1.38 | -0.24 |
| 56245  | -0.29 | 4.80  | -0.35 |
| 56410  | -0.65 | -1.18 | -1.00 |
| 53026  | 0.09  | -0.50 | -1.08 |
| 52323  | -0.38 | 0.32  | 2.78  |
| 51847  | 0.64  | -1.76 | -0.83 |
| 51252  | -1.14 | 3.28  | -0.34 |
| 50588  | 2.86  | -0.51 | -0.44 |
| 49172  | -0.47 | -1.07 | -0.11 |
| 49098  | 2.24  | -1.55 | -0.84 |
| 48416  | -0.41 | 0.21  | -1.05 |
| 41318  | -0.88 | 0.03  | 0.30  |
| 40544  | 0.18  | 0.71  | -0.79 |
| 37943  | -0.64 | -0.49 | -0.64 |
| 36605  | -0.46 | -1.63 | -0.70 |
| 36676  | -0.20 | -0.32 | -0.24 |
| 32906  | 1.35  | -1.77 | -0.13 |
| 30537  | -0.48 | -0.85 | -0.06 |
| 29005  | -0.56 | -0.70 | 0.20  |
| 28163  | -0.76 | 0.69  | -0.20 |
| 28118  | -1.03 | -0.76 | -1.30 |
| 27350  | 0.24  | 0.97  | -1.08 |
| 27199  | -0.05 | 2.39  | -0.05 |
| 26769  | -0.69 | -0.81 | -0.15 |
| 26325  | 4.12  | -1.02 | 0.00  |
| 26241  | -1.01 | -2.02 | 0.01  |
| 26016  | 0.47  | -1.27 | -0.50 |

|       |       |       |       |
|-------|-------|-------|-------|
| 25811 | -0.49 | 4.54  | -0.12 |
| 25540 | -0.50 | 1.09  | 1.23  |
| 23949 | -0.51 | -0.07 | 0.33  |
| 23822 | 1.23  | -1.16 | -1.17 |
| 23449 | -0.40 | 1.33  | -0.45 |
| 23446 | -0.42 | -0.19 | 0.84  |
| 23397 | -0.68 | -0.74 | 0.66  |
| 23176 | -0.85 | -0.38 | -0.11 |
| 20718 | 1.41  | 0.02  | -0.04 |
| 20235 | 1.29  | -1.36 | -0.50 |
| 19721 | -0.65 | -1.33 | 2.10  |
| 18520 | -0.50 | -1.48 | -0.21 |
| 18147 | 0.13  | 1.32  | 0.55  |
| 16585 | 0.81  | -2.04 | -0.73 |
| 16186 | -0.55 | -0.68 | -0.47 |
| 16186 | -0.55 | -0.68 | -0.47 |
| 15369 | 0.57  | -0.33 | -0.35 |
| 15277 | 3.54  | -1.28 | -0.31 |
| 15261 | 0.91  | -2.06 | -0.75 |
| 14130 | 0.77  | -0.96 | 0.09  |
| 13673 | -0.12 | -0.50 | 0.06  |
| 13338 | -0.37 | -0.39 | -0.34 |
| 12970 | 0.32  | -0.98 | -0.91 |
| 12358 | 0.68  | -1.39 | -0.16 |
| 12315 | 0.88  | -1.52 | -0.69 |
| 12195 | -0.44 | 0.51  | -0.56 |
| 11818 | -0.63 | -0.46 | -0.30 |
| 11405 | -0.50 | 3.21  | 1.10  |
| 11100 | -0.35 | -1.72 | -0.62 |
| 11007 | -0.34 | -0.42 | -0.25 |
| 10799 | 0.38  | 0.14  | -0.52 |
| 10674 | 1.73  | -0.86 | 0.40  |
| 10591 | -0.30 | -2.01 | -1.01 |

---

counts shown are exact matches + inc:0

|                          |           |
|--------------------------|-----------|
| 0                        | 0         |
| total of totals of =100: | 139641984 |
| UC                       | A_11      |
| UC                       | A_16      |
| UC                       | A_2       |
| UC                       | A_4       |
| UC                       | B_29      |
| UC                       | B_32      |
| UC                       | B_34      |
| UC                       | C_1       |
| UC                       | C_40      |
| UC                       | C_41      |
| UC                       | C_42      |
| UC                       | C_44      |
| UC                       | C_46      |
| UC                       | C_47      |
| UC                       | D_16      |
| UC                       | D_17      |
| UC                       | D_18      |
| UC                       | D_36      |
| UC                       | D_4       |
| UC                       | E_47      |

each miR ran: use 136 miRNAs:

|               |                        |
|---------------|------------------------|
| 2071          | ID                     |
| total all miR | total all samples =100 |
| 479320        | A_11                   |
| 21319         | A_16                   |
| 1102300       | A_2                    |
| 1969971       | A_4                    |
| 71054         | B_29                   |
| 356562        | B_32                   |
| 1363063       | B_34                   |
| 824884        | C_1                    |
| 2206918       | C_40                   |
| 623719        | C_41                   |
| 774447        | C_42                   |
| 627333        | C_44                   |
| 2772220       | C_46                   |
| 1217409       | C_47                   |
| 4032681       | D_16                   |
| 1739788       | D_17                   |
| 1227867       | D_18                   |
| 121631        | D_36                   |
| 2029037       | D_4                    |
| 1734052       | E_47                   |

|        |      |         |      |
|--------|------|---------|------|
| UC     | F_43 | 1026638 | F_43 |
| UC     | F_6  | 1873959 | F_6  |
| UC     | F_7  | 1687678 | F_7  |
| UC     | F_8  | 1238990 | F_8  |
| UC     | G_33 | 121924  | G_33 |
| UC     | G_34 | 416015  | G_34 |
| UC     | G_8  | 1782397 | G_8  |
| CHR_NP | A_1  | 2570804 | A_1  |
| CHR_NP | A_13 | 371228  | A_13 |
| CHR_NP | A_14 | 359180  | A_14 |
| CHR_NP | A_15 | 111957  | A_15 |
| CHR_NP | A_17 | 117100  | A_17 |
| CHR_NP | B_30 | 148505  | B_30 |
| CHR_NP | B_33 | 1922117 | B_33 |
| CHR_NP | C_2  | 685397  | C_2  |
| CHR_NP | C_37 | 2915691 | C_37 |
| CHR_NP | C_38 | 932164  | C_38 |
| CHR_NP | C_39 | 148130  | C_39 |
| CHR_NP | C_43 | 2018570 | C_43 |
| CHR_NP | C_48 | 2072241 | C_48 |
| CHR_NP | D_10 | 727386  | D_10 |
| CHR_NP | D_12 | 206047  | D_12 |
| CHR_NP | D_13 | 2758841 | D_13 |
| CHR_NP | D_14 | 2173631 | D_14 |
| CHR_NP | D_3  | 852941  | D_3  |
| CHR_NP | D_9  | 239935  | D_9  |
| CHR_NP | E_20 | 1893208 | E_20 |
| CHR_NP | E_29 | 1240451 | E_29 |
| CHR_NP | E_4  | 2304775 | E_4  |
| CHR_NP | E_5  | 1597470 | E_5  |
| CHR_NP | E_6  | 1583268 | E_6  |
| CHR_NP | F_1  | 2592561 | F_1  |
| CHR_NP | F_35 | 3565545 | F_35 |
| CHR_NP | F_36 | 2585170 | F_36 |
| CHR_NP | F_37 | 976547  | F_37 |
| CHR_NP | F_38 | 1738984 | F_38 |
| CHR_NP | F_39 | 1856730 | F_39 |
| CHR_NP | G_3  | 2304707 | G_3  |
| CHR_NP | G_30 | 924323  | G_30 |
| CHR_NP | G_31 | 555209  | G_31 |
| CHR_NP | G_32 | 358914  | G_32 |
| CHR_NP | G_4  | 3926455 | G_4  |
| CHR_NP | G_5  | 1257195 | G_5  |
| CHR_NP | G_6  | 488065  | G_6  |
| CHR_NP | G_7  | 1421920 | G_7  |
| CHR_P  | A_10 | 492624  | A_10 |
| CHR_P  | A_12 | 721119  | A_12 |
| CHR_P  | A_18 | 27468   | A_18 |
| CHR_P  | A_3  | 816795  | A_3  |
| CHR_P  | A_5  | 972175  | A_5  |
| CHR_P  | A_6  | 1468719 | A_6  |
| CHR_P  | B_31 | 409595  | B_31 |
| CHR_P  | C_4  | 1862148 | C_4  |
| CHR_P  | C_45 | 4820581 | C_45 |
| CHR_P  | D_11 | 198165  | D_11 |
| CHR_P  | D_35 | 2718285 | D_35 |
| CHR_P  | D_5  | 905697  | D_5  |
| CHR_P  | D_6  | 128375  | D_6  |
| CHR_P  | E_19 | 4686947 | E_19 |

|       |      |         |      |
|-------|------|---------|------|
| CHR_P | E_21 | 1336672 | E_21 |
| CHR_P | E_22 | 1032612 | E_22 |
| CHR_P | E_23 | 1495548 | E_23 |
| CHR_P | E_3  | 331698  | E_3  |
| CHR_P | E_46 | 1653485 | E_46 |
| CHR_P | E_48 | 7479891 | E_48 |
| CHR_P | E_7  | 1160935 | E_7  |
| CHR_P | E_8  | 2099567 | E_8  |
| CHR_P | E_9  | 1323600 | E_9  |
| CHR_P | F_40 | 3571995 | F_40 |
| CHR_P | F_41 | 3076499 | F_41 |
| CHR_P | F_42 | 1136044 | F_42 |
| CHR_P | F_44 | 2580829 | F_44 |
| CHR_P | F_9  | 1797912 | F_9  |
| CHR_P | G_10 | 999373  | G_10 |
| CHR_P | G_9  | 336028  | G_9  |

|        |
|--------|
| UC ave |
| UC sd  |

min= 0.006 ttest NPvP

ALL SAMPLES FROZEN

|                                        |           |                              |                       |    |
|----------------------------------------|-----------|------------------------------|-----------------------|----|
| counts shown are exact matches + inc:0 | 0         | each miR ran\use 136 miRNAs: | 2071                  | ID |
| total of totals of =100:               | 139641984 | total all miR                | total all samples =10 |    |
| UC                                     | A_11      | 479320                       | A_11                  |    |
| UC                                     | A_16      | 21319                        | A_16                  |    |
| UC                                     | A_2       | 1102300                      | A_2                   |    |
| UC                                     | A_4       | 1969971                      | A_4                   |    |
| UC                                     | B_29      | 71054                        | B_29                  |    |
| UC                                     | B_32      | 356562                       | B_32                  |    |
| UC                                     | B_34      | 1363063                      | B_34                  |    |
| UC                                     | C_1       | 824884                       | C_1                   |    |
| UC                                     | C_40      | 2206918                      | C_40                  |    |
| UC                                     | C_41      | 623719                       | C_41                  |    |
| UC                                     | C_42      | 774447                       | C_42                  |    |
| UC                                     | C_44      | 627333                       | C_44                  |    |
| UC                                     | C_46      | 2772220                      | C_46                  |    |
| UC                                     | C_47      | 1217409                      | C_47                  |    |
| UC                                     | D_16      | 4032681                      | D_16                  |    |
| UC                                     | D_17      | 1739788                      | D_17                  |    |
| UC                                     | D_18      | 1227867                      | D_18                  |    |
| UC                                     | D_36      | 121631                       | D_36                  |    |
| UC                                     | D_4       | 2029037                      | D_4                   |    |
| UC                                     | E_47      | 1734052                      | E_47                  |    |
| UC                                     | F_43      | 1026638                      | F_43                  |    |
| UC                                     | F_6       | 1873959                      | F_6                   |    |
| UC                                     | F_7       | 1687678                      | F_7                   |    |
| UC                                     | F_8       | 1238990                      | F_8                   |    |
| UC                                     | G_33      | 121924                       | G_33                  |    |
| UC                                     | G_34      | 416015                       | G_34                  |    |
| UC                                     | G_8       | 1782397                      | G_8                   |    |
| CHR_NP                                 | A_1       | 2570804                      | A_1                   |    |

|        |      |         |      |
|--------|------|---------|------|
| CHR_NP | A_13 | 371228  | A_13 |
| CHR_NP | A_14 | 359180  | A_14 |
| CHR_NP | A_15 | 111957  | A_15 |
| CHR_NP | A_17 | 117100  | A_17 |
| CHR_NP | B_30 | 148505  | B_30 |
| CHR_NP | B_33 | 1922117 | B_33 |
| CHR_NP | C_2  | 685397  | C_2  |
| CHR_NP | C_37 | 2915691 | C_37 |
| CHR_NP | C_38 | 822164  | C_38 |

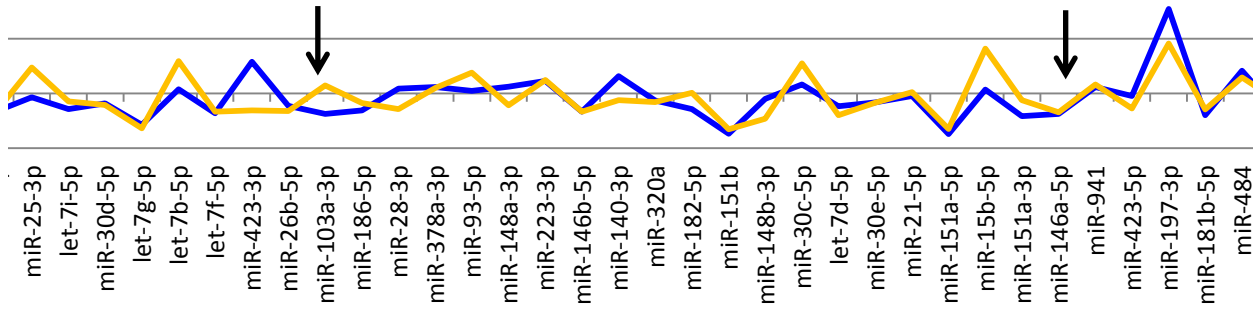

|        |      |         |      |
|--------|------|---------|------|
| CHR_NP | F_37 | 578347  | F_37 |
| CHR_NP | F_38 | 1738984 | F_38 |
| CHR_NP | F_39 | 1856730 | F_39 |
| CHR_NP | G_3  | 2304707 | G_3  |
| CHR_NP | G_30 | 924323  | G_30 |
| CHR_NP | G_31 | 555209  | G_31 |
| CHR_NP | G_32 | 358914  | G_32 |
| CHR_NP | G_4  | 3926455 | G_4  |
| CHR_NP | G_5  | 1257195 | G_5  |
| CHR_NP | G_6  | 488065  | G_6  |
| CHR_NP | G_7  | 1421920 | G_7  |
| CHR_P  | A_10 | 492624  | A_10 |
| CHR_P  | A_12 | 721119  | A_12 |
| CHR_P  | A_18 | 27468   | A_18 |
| CHR_P  | A_3  | 816795  | A_3  |
| CHR_P  | A_5  | 972175  | A_5  |
| CHR_P  | A_6  | 1468719 | A_6  |
| CHR_P  | B_31 | 409595  | B_31 |
| CHR_P  | C_4  | 1862148 | C_4  |
| CHR_P  | C_45 | 4820581 | C_45 |
| CHR_P  | D_11 | 198165  | D_11 |
| CHR_P  | D_35 | 2718285 | D_35 |
| CHR_P  | D_5  | 905697  | D_5  |
| CHR_P  | D_6  | 128375  | D_6  |
| CHR_P  | E_19 | 4686947 | E_19 |
| CHR_P  | E_21 | 1336672 | E_21 |
| CHR_P  | E_22 | 1032612 | E_22 |
| CHR_P  | E_23 | 1495548 | E_23 |
| CHR_P  | E_3  | 331698  | E_3  |
| CHR_P  | E_46 | 1653485 | E_46 |
| CHR_P  | E_48 | 7479891 | E_48 |
| CHR_P  | E_7  | 1160935 | E_7  |
| CHR_P  | E_8  | 2099567 | E_8  |



|       |      |         |      |
|-------|------|---------|------|
| CHR_P | E_9  | 1323600 | E_9  |
| CHR_P | F_40 | 3571995 | F_40 |
| CHR_P | F_41 | 3076499 | F_41 |
| CHR_P | F_42 | 1136044 | F_42 |
| CHR_P | F_44 | 2580829 | F_44 |
| CHR_P | F_9  | 1797912 | F_9  |
| CHR_P | G_10 | 999373  | G_10 |
| CHR_P | G_9  | 336028  | G_9  |

---

ALL SAMPLES FROZEN

|                                        |           |               |                        |
|----------------------------------------|-----------|---------------|------------------------|
| counts shown are exact matches + inc:0 |           | each miR ran  | use 136 miRNAs:        |
| 0                                      | 0         | 2071          | ID                     |
| total of totals of =100:               | 139641984 | total all miR | total all samples =100 |
| UC                                     | A_11      | 479320        | A_11                   |
| UC                                     | A_16      | 21319         | A_16                   |
| UC                                     | A_2       | 1102300       | A_2                    |
| UC                                     | A_4       | 1969971       | A_4                    |
| UC                                     | B_29      | 71054         | B_29                   |
| UC                                     | B_32      | 356562        | B_32                   |
| UC                                     | B_34      | 1363063       | B_34                   |
| UC                                     | C_1       | 824884        | C_1                    |
| UC                                     | C_40      | 2206918       | C_40                   |
| UC                                     | C_41      | 623719        | C_41                   |
| UC                                     | C_42      | 774447        | C_42                   |
| UC                                     | C_44      | 627333        | C_44                   |
| UC                                     | C_46      | 2772220       | C_46                   |
| UC                                     | C_47      | 1217409       | C_47                   |
| UC                                     | D_16      | 4032681       | D_16                   |
| UC                                     | D_17      | 1739788       | D_17                   |
| UC                                     | D_18      | 1227867       | D_18                   |
| UC                                     | D_36      | 121631        | D_36                   |
| UC                                     | D_4       | 2029037       | D_4                    |
| UC                                     | E_47      | 1734052       | E_47                   |
| UC                                     | F_43      | 1026638       | F_43                   |
| UC                                     | F_6       | 1873959       | F_6                    |
| UC                                     | F_7       | 1687678       | F_7                    |
| UC                                     | F_8       | 1238990       | F_8                    |
| UC                                     | G_33      | 121924        | G_33                   |
| UC                                     | G_34      | 416015        | G_34                   |
| UC                                     | G_8       | 1782397       | G_8                    |
| CHR_NP                                 | A_1       | 2570804       | A_1                    |
| CHR_NP                                 | A_13      | 371228        | A_13                   |
| CHR_NP                                 | A_14      | 359180        | A_14                   |
| CHR_NP                                 | A_15      | 111957        | A_15                   |
| CHR_NP                                 | A_17      | 117100        | A_17                   |
| CHR_NP                                 | B_30      | 148505        | B_30                   |
| CHR_NP                                 | B_33      | 1922117       | B_33                   |
| CHR_NP                                 | C_2       | 685397        | C_2                    |
| CHR_NP                                 | C_37      | 2915691       | C_37                   |
| CHR_NP                                 | C_38      | 822164        | C_38                   |

---

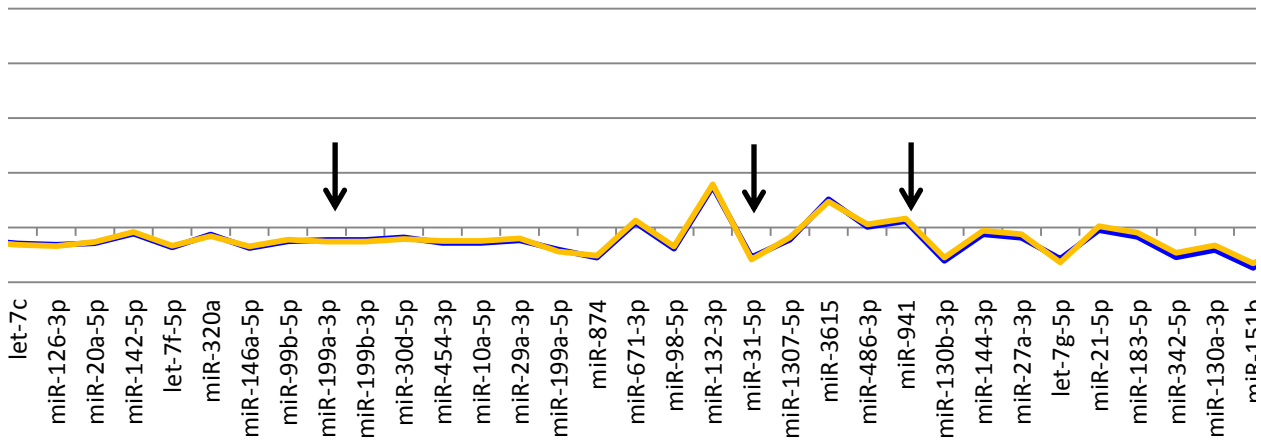

|        |      |           |      |
|--------|------|-----------|------|
| CHR_NP | F_37 | 978347    | F_37 |
| CHR_NP | F_38 | 1738984   | F_38 |
| CHR_NP | F_39 | 1856730   | F_39 |
| CHR_NP | G_3  | 2304707   | G_3  |
| CHR_NP | G_30 | 924323    | G_30 |
| CHR_NP | G_31 | 555209    | G_31 |
| CHR_NP | G_32 | 358914    | G_32 |
| CHR_NP | G_4  | 3926455   | G_4  |
| CHR_NP | G_5  | 1257195   | G_5  |
| CHR_NP | G_6  | 488065    | G_6  |
| CHR_NP | G_7  | 1421920   | G_7  |
| CHR_P  | A_10 | 492624    | A_10 |
| CHR_P  | A_12 | 721119    | A_12 |
| CHR_P  | A_18 | 27468     | A_18 |
| CHR_P  | A_3  | 816795    | A_3  |
| CHR_P  | A_5  | 972175    | A_5  |
| CHR_P  | A_6  | 1468719   | A_6  |
| CHR_P  | B_31 | 409595    | B_31 |
| CHR_P  | C_4  | 1862148   | C_4  |
| CHR_P  | C_45 | 4820581   | C_45 |
| CHR_P  | D_11 | 198165    | D_11 |
| CHR_P  | D_35 | 2718285   | D_35 |
| CHR_P  | D_5  | 905697    | D_5  |
| CHR_P  | D_6  | 128375    | D_6  |
| CHR_P  | E_19 | 4686947   | E_19 |
| CHR_P  | E_21 | 1336672   | E_21 |
| CHR_P  | E_22 | 1032612   | E_22 |
| CHR_P  | E_23 | 1495548   | E_23 |
| CHR_P  | E_3  | 331698    | E_3  |
| CHR_P  | E_46 | 1653485   | E_46 |
| CHR_P  | E_48 | 7479891   | E_48 |
| CHR_P  | E_7  | 1160935   | E_7  |
| CHR_P  | E_8  | 2099567   | E_8  |
| CHR_P  | E_9  | 1323600   | E_9  |
| CHR_P  | F_40 | 3571995   | F_40 |
| CHR_P  | F_41 | 3076499   | F_41 |
| CHR_P  | F_42 | 1136044   | F_42 |
| CHR_P  | F_44 | 2580829   | F_44 |
| CHR_P  | F_9  | 1797912   | F_9  |
| CHR_P  | G_10 | 999373    | G_10 |
| CHR_P  | G_9  | 336028.00 | G_9  |

21 are >= 1.1; the five are <= 1.0

abs delta  
absdelt/(abs+abs)

-0.77215 b=3.0153

y dup:

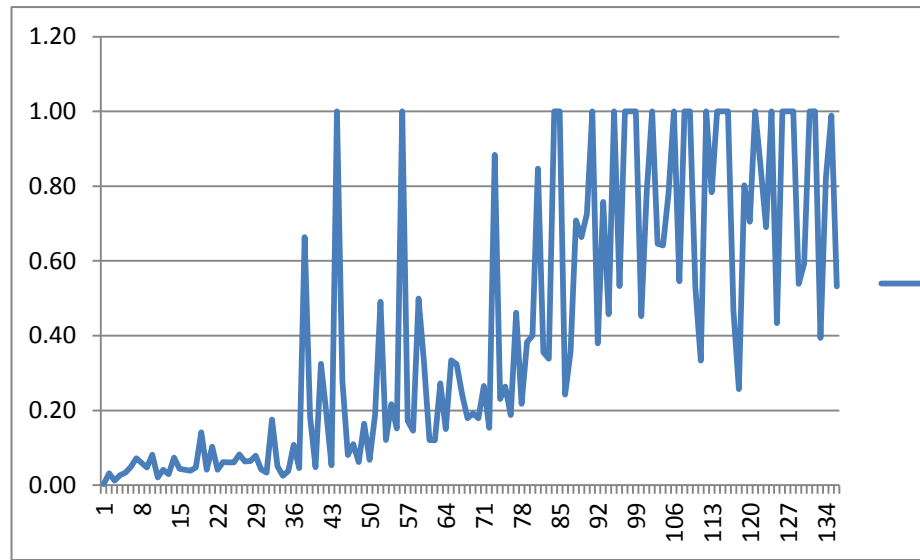









































































































































































1969971

14538

71054

1

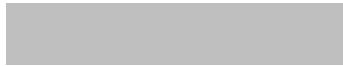

1

4  
4  
A\_4  
UC  
8888098  
0.87  
A\_4  
6918127  
1083588  
51322  
49632  
143882  
65367  
34942  
36120  
7608  
37604  
80209  
50730  
26927  
33640  
40345  
8967  
9272  
6907  
11271  
6868  
9093  
7556  
16114  
5128  
4274  
3875  
12666  
7317  
5860  
5305  
4367  
3309  
8149  
2955  
838  
3526  
7659  
2236  
3355  
3451  
4517  
2457  
2054  
3384  
808  
2367

5  
5  
A\_7  
UC  
142388  
0.69  
A\_7  
127850  
3496  
288  
1322  
383  
966  
234  
120  
299  
104  
1957  
980  
181  
69  
333  
190  
98  
26  
82  
46  
124  
71  
66  
233  
104  
81  
144  
129  
673  
52  
13  
37  
24  
11  
38  
39  
20  
24  
149  
4  
29  
38  
40  
13  
16  
171

6  
6  
B\_29  
UC  
216489  
1.00  
B\_29  
145435  
3861  
11755  
10912  
10803  
4310  
3715  
5832  
150  
180  
824  
561  
928  
1497  
1133  
606  
108  
819  
730  
276  
357  
409  
186  
56  
416  
440  
44  
230  
73  
543  
84  
233  
372  
125  
136  
493  
1914  
306  
505  
352  
43  
357  
174  
321  
58  
394

|      |     |     |
|------|-----|-----|
| 2546 | 19  | 83  |
| 1557 | 12  | 57  |
| 3411 | 34  | 52  |
| 1115 | 0   | 4   |
| 421  | 107 | 7   |
| 909  | 7   | 98  |
| 602  | 33  | 338 |
| 1823 | 21  | 107 |
| 1682 | 183 | 32  |
| 1231 | 33  | 1   |
| 254  | 28  | 3   |
| 1262 | 3   | 125 |
| 758  | 5   | 56  |
| 1404 | 6   | 144 |
| 1169 | 18  | 299 |
| 801  | 4   | 64  |
| 509  | 11  | 35  |
| 164  | 6   | 11  |
| 32   | 1   | 4   |
| 1947 | 4   | 14  |
| 792  | 3   | 58  |
| 310  | 23  | 20  |
| 547  | 2   | 21  |
| 588  | 15  | 54  |
| 1901 | 3   | 39  |
| 385  | 7   | 96  |
| 1954 | 2   | 32  |
| 346  | 9   | 20  |
| 1125 | 14  | 0   |
| 361  | 4   | 70  |
| 354  | 8   | 31  |
| 666  | 6   | 1   |
| 248  | 32  | 60  |
| 449  | 4   | 77  |
| 176  | 4   | 93  |
| 1112 | 1   | 31  |
| 504  | 12  | 2   |
| 550  | 0   | 58  |
| 73   | 27  | 9   |
| 276  | 6   | 13  |
| 272  | 17  | 8   |
| 416  | 8   | 39  |
| 286  | 2   | 16  |
| 296  | 0   | 28  |
| 436  | 0   | 42  |
| 238  | 8   | 11  |
| 23   | 0   | 1   |
| 559  | 2   | 4   |
| 225  | 6   | 8   |
| 78   | 2   | 5   |
| 128  | 7   | 31  |
| 165  | 2   | 33  |
| 306  | 10  | 4   |
| 339  | 1   | 28  |
| 57   | 0   | 7   |
| 343  | 0   | 13  |
| 196  | 0   | 7   |
| 210  | 4   | 29  |
| 373  | 8   | 17  |



|     |    |    |
|-----|----|----|
| 318 | 1  | 9  |
| 240 | 7  | 3  |
| 101 | 6  | 28 |
| 91  | 0  | 71 |
| 196 | 0  | 14 |
| 121 | 8  | 6  |
| 104 | 1  | 6  |
| 230 | 2  | 9  |
| 144 | 9  | 7  |
| 306 | 0  | 9  |
| 92  | 2  | 19 |
| 285 | 1  | 8  |
| 91  | 3  | 1  |
| 114 | 0  | 16 |
| 114 | 0  | 16 |
| 140 | 1  | 41 |
| 285 | 5  | 2  |
| 234 | 1  | 4  |
| 53  | 2  | 0  |
| 128 | 9  | 4  |
| 7   | 0  | 1  |
| 134 | 2  | 22 |
| 77  | 1  | 14 |
| 100 | 1  | 2  |
| 68  | 6  | 14 |
| 179 | 0  | 23 |
| 51  | 0  | 2  |
| 82  | 4  | 3  |
| 47  | 1  | 2  |
| 85  | 5  | 29 |
| 93  | 0  | 0  |
| 43  | 3  | 5  |
| 102 | 16 | 2  |
| 197 | 0  | 2  |
| 127 | 0  | 3  |
| 69  | 1  | 8  |
| 119 | 5  | 3  |
| 55  | 0  | 8  |
| 112 | 11 | 6  |
| 60  | 1  | 12 |
| 8   | 1  | 0  |
| 151 | 0  | 0  |
| 108 | 0  | 9  |
| 37  | 1  | 4  |
| 114 | 0  | 16 |
| 129 | 2  | 12 |
| 32  | 1  | 0  |
| 69  | 0  | 2  |
| 33  | 2  | 0  |
| 75  | 0  | 5  |
| 22  | 11 | 0  |
| 99  | 0  | 4  |
| 49  | 1  | 2  |
| 33  | 4  | 2  |
| 71  | 3  | 3  |
| 258 | 1  | 1  |
| 4   | 0  | 0  |
| 66  | 0  | 4  |
| 55  | 0  | 8  |

|     |   |    |
|-----|---|----|
| 46  | 0 | 3  |
| 30  | 0 | 4  |
| 141 | 1 | 0  |
| 47  | 0 | 9  |
| 23  | 3 | 2  |
| 5   | 0 | 1  |
| 115 | 2 | 0  |
| 0   | 0 | 4  |
| 93  | 5 | 0  |
| 65  | 1 | 2  |
| 33  | 1 | 11 |
| 18  | 0 | 1  |
| 37  | 2 | 9  |
| 18  | 2 | 14 |
| 25  | 0 | 1  |
| 59  | 0 | 3  |
| 15  | 0 | 4  |
| 81  | 0 | 1  |
| 19  | 1 | 0  |
| 26  | 6 | 4  |
| 25  | 0 | 2  |
| 33  | 0 | 4  |
| 68  | 0 | 1  |
| 19  | 0 | 0  |
| 26  | 0 | 1  |
| 10  | 0 | 6  |
| 15  | 0 | 2  |
| 36  | 0 | 1  |
| 5   | 0 | 0  |
| 26  | 0 | 6  |
| 52  | 0 | 4  |
| 81  | 0 | 2  |
| 31  | 0 | 3  |
| 9   | 2 | 0  |
| 87  | 1 | 2  |
| 23  | 1 | 3  |
| 142 | 0 | 1  |
| 39  | 0 | 0  |
| 27  | 0 | 11 |
| 44  | 0 | 4  |
| 30  | 3 | 0  |
| 42  | 0 | 1  |
| 32  | 0 | 0  |
| 57  | 0 | 1  |
| 40  | 0 | 0  |
| 7   | 0 | 2  |
| 93  | 6 | 1  |
| 33  | 0 | 8  |
| 24  | 0 | 1  |
| 7   | 0 | 1  |
| 54  | 1 | 4  |
| 18  | 1 | 0  |
| 12  | 0 | 1  |
| 23  | 0 | 2  |
| 16  | 1 | 1  |
| 2   | 0 | 0  |
| 62  | 0 | 3  |
| 14  | 1 | 3  |
| 39  | 0 | 0  |

|    |   |   |
|----|---|---|
| 27 | 1 | 3 |
| 35 | 2 | 1 |
| 15 | 0 | 1 |
| 22 | 0 | 2 |
| 37 | 1 | 1 |
| 59 | 1 | 0 |
| 27 | 0 | 3 |
| 31 | 0 | 3 |
| 6  | 0 | 0 |
| 20 | 0 | 1 |
| 0  | 0 | 0 |
| 22 | 1 | 1 |
| 28 | 0 | 0 |
| 39 | 0 | 0 |
| 14 | 0 | 2 |
| 15 | 1 | 2 |
| 8  | 0 | 4 |
| 30 | 0 | 0 |
| 13 | 0 | 2 |
| 13 | 0 | 0 |
| 4  | 0 | 1 |
| 8  | 1 | 3 |
| 8  | 1 | 3 |
| 14 | 1 | 1 |
| 24 | 0 | 2 |
| 10 | 0 | 1 |
| 6  | 1 | 0 |
| 22 | 0 | 3 |
| 16 | 1 | 1 |
| 21 | 4 | 0 |
| 31 | 0 | 2 |
| 11 | 0 | 0 |
| 10 | 0 | 2 |
| 11 | 0 | 1 |
| 8  | 2 | 0 |
| 18 | 0 | 3 |
| 1  | 0 | 0 |
| 34 | 0 | 0 |
| 16 | 0 | 1 |
| 13 | 0 | 1 |
| 40 | 0 | 2 |
| 16 | 0 | 1 |
| 16 | 3 | 0 |
| 16 | 0 | 0 |
| 35 | 0 | 0 |
| 21 | 0 | 2 |
| 1  | 0 | 0 |
| 6  | 0 | 0 |
| 32 | 0 | 1 |
| 43 | 0 | 0 |
| 7  | 0 | 1 |
| 4  | 0 | 0 |
| 4  | 0 | 0 |
| 17 | 0 | 3 |
| 11 | 0 | 0 |
| 5  | 0 | 1 |
| 29 | 0 | 0 |
| 14 | 0 | 6 |
| 11 | 0 | 4 |

|    |   |   |
|----|---|---|
| 8  | 0 | 1 |
| 9  | 0 | 2 |
| 8  | 0 | 0 |
| 15 | 1 | 0 |
| 10 | 0 | 3 |
| 10 | 0 | 1 |
| 10 | 0 | 0 |
| 4  | 2 | 0 |
| 2  | 0 | 0 |
| 6  | 0 | 1 |
| 3  | 0 | 2 |
| 10 | 1 | 0 |
| 12 | 0 | 0 |
| 6  | 1 | 0 |
| 4  | 2 | 0 |
| 5  | 0 | 0 |
| 15 | 0 | 0 |
| 6  | 0 | 0 |
| 11 | 0 | 0 |
| 4  | 0 | 0 |
| 5  | 0 | 1 |
| 13 | 0 | 1 |
| 13 | 0 | 0 |
| 10 | 1 | 0 |
| 3  | 0 | 1 |
| 17 | 0 | 0 |
| 7  | 0 | 1 |
| 5  | 0 | 1 |
| 12 | 0 | 0 |
| 9  | 0 | 0 |
| 9  | 0 | 0 |
| 5  | 0 | 0 |
| 0  | 0 | 1 |
| 6  | 0 | 0 |
| 13 | 0 | 2 |
| 16 | 0 | 0 |
| 6  | 0 | 0 |
| 13 | 0 | 0 |
| 4  | 0 | 1 |
| 10 | 0 | 0 |
| 7  | 0 | 0 |
| 7  | 0 | 1 |
| 7  | 0 | 0 |
| 8  | 1 | 1 |
| 0  | 0 | 0 |
| 0  | 1 | 0 |
| 10 | 0 | 1 |
| 15 | 1 | 1 |
| 1  | 1 | 3 |
| 15 | 0 | 2 |
| 11 | 0 | 1 |
| 1  | 0 | 0 |
| 5  | 0 | 0 |
| 1  | 0 | 1 |
| 4  | 0 | 0 |
| 7  | 0 | 0 |
| 13 | 0 | 0 |
| 1  | 0 | 1 |
| 10 | 1 | 0 |



|   |   |   |
|---|---|---|
| 7 | 0 | 0 |
| 0 | 0 | 0 |
| 4 | 0 | 0 |
| 0 | 0 | 0 |
| 3 | 0 | 0 |
| 4 | 1 | 0 |
| 0 | 0 | 0 |
| 2 | 0 | 0 |
| 0 | 0 | 0 |
| 4 | 0 | 0 |
| 2 | 0 | 0 |
| 0 | 0 | 0 |
| 0 | 0 | 0 |
| 6 | 0 | 0 |
| 2 | 0 | 0 |
| 1 | 0 | 0 |
| 3 | 0 | 0 |
| 0 | 0 | 1 |
| 0 | 0 | 0 |
| 0 | 0 | 0 |
| 0 | 0 | 0 |
| 1 | 0 | 0 |
| 0 | 0 | 0 |
| 3 | 0 | 0 |
| 0 | 0 | 0 |
| 3 | 0 | 0 |
| 2 | 0 | 0 |
| 2 | 0 | 0 |
| 0 | 0 | 0 |
| 0 | 0 | 0 |
| 1 | 0 | 0 |
| 5 | 1 | 2 |
| 4 | 0 | 0 |
| 2 | 0 | 1 |
| 0 | 0 | 0 |
| 3 | 0 | 0 |
| 0 | 0 | 0 |
| 0 | 1 | 0 |
| 4 | 0 | 0 |
| 0 | 0 | 0 |
| 1 | 0 | 0 |
| 4 | 0 | 0 |
| 1 | 0 | 0 |
| 5 | 0 | 0 |
| 1 | 0 | 0 |
| 1 | 0 | 0 |
| 2 | 0 | 0 |
| 5 | 0 | 0 |
| 2 | 0 | 0 |
| 2 | 0 | 0 |
| 3 | 0 | 0 |
| 3 | 0 | 0 |
| 5 | 0 | 0 |
| 2 | 0 | 0 |
| 1 | 0 | 0 |
| 0 | 0 | 0 |
| 1 | 0 | 0 |
| 4 | 0 | 1 |

|   |   |   |
|---|---|---|
| 0 | 0 | 0 |
| 1 | 0 | 0 |
| 1 | 0 | 0 |
| 0 | 0 | 0 |
| 1 | 0 | 0 |
| 1 | 0 | 0 |
| 1 | 0 | 0 |
| 0 | 0 | 0 |
| 0 | 0 | 0 |
| 0 | 0 | 0 |
| 3 | 0 | 0 |
| 0 | 0 | 0 |
| 1 | 0 | 1 |
| 5 | 0 | 0 |
| 2 | 0 | 0 |
| 1 | 0 | 0 |
| 0 | 0 | 0 |
| 0 | 0 | 0 |
| 1 | 0 | 1 |
| 2 | 0 | 0 |
| 0 | 0 | 0 |
| 1 | 0 | 0 |
| 1 | 0 | 1 |
| 0 | 0 | 0 |
| 0 | 0 | 0 |
| 1 | 0 | 0 |
| 1 | 0 | 0 |
| 0 | 0 | 0 |
| 1 | 0 | 0 |
| 0 | 0 | 0 |
| 4 | 0 | 0 |
| 1 | 0 | 0 |
| 1 | 0 | 0 |
| 0 | 0 | 0 |
| 1 | 0 | 0 |
| 7 | 0 | 0 |
| 1 | 0 | 0 |
| 0 | 0 | 0 |
| 3 | 0 | 0 |
| 2 | 0 | 0 |
| 3 | 0 | 0 |
| 0 | 0 | 0 |
| 3 | 0 | 0 |
| 0 | 0 | 0 |
| 4 | 0 | 0 |
| 0 | 0 | 0 |
| 4 | 0 | 0 |
| 4 | 1 | 0 |
| 3 | 0 | 0 |
| 2 | 0 | 1 |
| 2 | 0 | 0 |
| 0 | 0 | 0 |
| 2 | 0 | 0 |
| 1 | 0 | 0 |
| 1 | 0 | 0 |
| 0 | 0 | 0 |
| 2 | 0 | 0 |
| 1 | 0 | 0 |
| 3 | 0 | 0 |

|         |        |        |
|---------|--------|--------|
| 3       | 0      | 0      |
| 0       | 1      | 0      |
| 1       | 0      | 0      |
| 0       | 0      | 0      |
| 0       | 0      | 0      |
| 0       | 0      | 0      |
| 1       | 0      | 0      |
| 1       | 0      | 0      |
| 0       | 0      | 0      |
| 3       | 0      | 0      |
| 1       | 0      | 0      |
| 4       | 1      | 0      |
| 0       | 9      | 3      |
| A_4     | A_7    | B_29   |
| UC      | UC     | UC     |
| 6918127 | 127850 | 145435 |
| 24      | 28     | 22     |
| 0.64    | 1.43   | 0.08   |

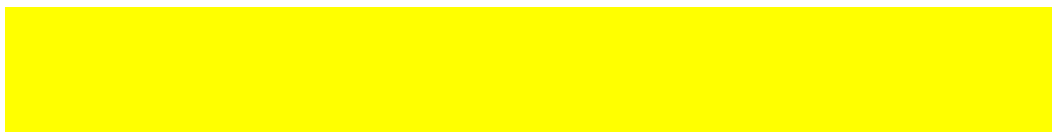

|         |       |        |
|---------|-------|--------|
| 0.59    | 0.75  | 0.23   |
| 12      | 8     | 23     |
| 1       | 1     | 1      |
| 4       | 5     | 6      |
| 4       | 5     | 6      |
| A_4     | B_29  | B_32   |
| UC      | UC    | UC     |
| 1969971 | 71054 | 356562 |
| A_4     | B_29  | B_32   |
| 1083588 | 3861  | 165954 |
| 51322   | 11755 | 17347  |
| 49632   | 10912 | 11202  |
| 143882  | 10803 | 37642  |
| 65367   | 4310  | 19686  |
| 34942   | 3715  | 6653   |
| 36120   | 5832  | 16299  |
| 7608    | 150   | 126    |
| 37604   | 180   | 2890   |
| 80209   | 824   | 7519   |
| 50730   | 561   | 12213  |
| 26927   | 928   | 3540   |
| 33640   | 1497  | 4451   |
| 40345   | 1133  | 4350   |
| 8967    | 606   | 2342   |
| 9272    | 108   | 7215   |
| 6907    | 819   | 1156   |
| 11271   | 730   | 1114   |
| 6868    | 276   | 730    |



|       |      |      |
|-------|------|------|
| 9093  | 357  | 2828 |
| 7556  | 409  | 1372 |
| 16114 | 186  | 725  |
| 5128  | 56   | 2398 |
| 4274  | 416  | 265  |
| 3875  | 440  | 703  |
| 12666 | 44   | 840  |
| 7317  | 230  | 1234 |
| 5860  | 73   | 129  |
| 5305  | 543  | 946  |
| 4367  | 84   | 1462 |
| 3309  | 233  | 444  |
| 8149  | 372  | 1040 |
| 2955  | 125  | 312  |
| 838   | 136  | 309  |
| 3526  | 493  | 855  |
| 7659  | 1914 | 922  |
| 2236  | 306  | 643  |
| 3355  | 505  | 980  |
| 3451  | 352  | 1148 |
| 4517  | 43   | 749  |
| 2457  | 357  | 182  |
| 2054  | 174  | 886  |
| 3384  | 321  | 560  |
| 808   | 58   | 105  |
| 2367  | 394  | 221  |
| 2546  | 83   | 726  |
| 1557  | 57   | 619  |
| 3411  | 52   | 398  |
| 1115  | 4    | 77   |
| 421   | 7    | 351  |
| 909   | 98   | 365  |
| 602   | 338  | 218  |
| 1823  | 107  | 276  |
| 1682  | 32   | 270  |
| 1231  | 1    | 339  |
| 254   | 3    | 26   |
| 1262  | 125  | 228  |
| 758   | 56   | 150  |
| 1404  | 144  | 571  |
| 1169  | 299  | 252  |
| 801   | 64   | 199  |
| 509   | 35   | 162  |
| 164   | 11   | 33   |
| 32    | 4    | 13   |
| 1947  | 14   | 603  |
| 792   | 58   | 64   |
| 310   | 20   | 26   |
| 547   | 21   | 26   |
| 588   | 54   | 35   |
| 1901  | 39   | 23   |
| 385   | 96   | 711  |
| 1954  | 32   | 277  |
| 346   | 20   | 55   |
| 1125  | 0    | 78   |
| 361   | 70   | 53   |
| 354   | 31   | 225  |
| 666   | 1    | 112  |
| 248   | 60   | 60   |

|      |    |     |
|------|----|-----|
| 449  | 77 | 221 |
| 176  | 93 | 154 |
| 1112 | 31 | 74  |
| 504  | 2  | 94  |
| 550  | 58 | 171 |
| 73   | 9  | 77  |
| 276  | 13 | 48  |
| 272  | 8  | 36  |
| 416  | 39 | 181 |
| 286  | 16 | 12  |
| 296  | 28 | 155 |
| 436  | 42 | 126 |
| 238  | 11 | 62  |
| 23   | 1  | 5   |
| 559  | 4  | 70  |
| 225  | 8  | 28  |
| 78   | 5  | 15  |
| 128  | 31 | 65  |
| 165  | 33 | 183 |
| 306  | 4  | 62  |
| 339  | 28 | 34  |
| 57   | 7  | 16  |
| 343  | 13 | 2   |
| 196  | 7  | 71  |
| 210  | 29 | 140 |
| 373  | 17 | 52  |
| 318  | 9  | 49  |
| 240  | 3  | 11  |
| 101  | 28 | 28  |
| 91   | 71 | 55  |
| 196  | 14 | 32  |
| 121  | 6  | 12  |
| 104  | 6  | 9   |
| 230  | 9  | 18  |
| 144  | 7  | 10  |
| 306  | 9  | 10  |
| 92   | 19 | 22  |
| 285  | 8  | 40  |
| 91   | 1  | 25  |
| 114  | 16 | 34  |
| 114  | 16 | 34  |
| 140  | 41 | 15  |
| 285  | 2  | 25  |
| 234  | 4  | 49  |
| 53   | 0  | 9   |
| 128  | 4  | 13  |
| 7    | 1  | 2   |
| 134  | 22 | 102 |
| 77   | 14 | 14  |
| 100  | 2  | 16  |
| 68   | 14 | 5   |
| 179  | 23 | 18  |
| 51   | 2  | 0   |
| 82   | 3  | 25  |
| 47   | 2  | 21  |
| 85   | 29 | 22  |
| 93   | 0  | 9   |
| 43   | 5  | 41  |
| 102  | 2  | 27  |

|     |    |    |
|-----|----|----|
| 197 | 2  | 3  |
| 127 | 3  | 12 |
| 69  | 8  | 10 |
| 119 | 3  | 50 |
| 55  | 8  | 9  |
| 112 | 6  | 22 |
| 60  | 12 | 25 |
| 8   | 0  | 2  |
| 151 | 0  | 18 |
| 108 | 9  | 35 |
| 37  | 4  | 8  |
| 114 | 16 | 34 |
| 129 | 12 | 7  |
| 32  | 0  | 3  |
| 69  | 2  | 4  |
| 33  | 0  | 7  |
| 75  | 5  | 27 |
| 22  | 0  | 2  |
| 99  | 4  | 15 |
| 49  | 2  | 1  |
| 33  | 2  | 2  |
| 71  | 3  | 3  |
| 258 | 1  | 5  |
| 4   | 0  | 8  |
| 66  | 4  | 6  |
| 55  | 8  | 18 |
| 46  | 3  | 6  |
| 30  | 4  | 6  |
| 141 | 0  | 34 |
| 47  | 9  | 4  |
| 23  | 2  | 14 |
| 5   | 1  | 1  |
| 115 | 0  | 8  |
| 0   | 4  | 6  |
| 93  | 0  | 25 |
| 65  | 2  | 27 |
| 33  | 11 | 23 |
| 18  | 1  | 6  |
| 37  | 9  | 9  |
| 18  | 14 | 28 |
| 25  | 1  | 20 |
| 59  | 3  | 2  |
| 15  | 4  | 3  |
| 81  | 1  | 0  |
| 19  | 0  | 2  |
| 26  | 4  | 2  |
| 25  | 2  | 1  |
| 33  | 4  | 5  |
| 68  | 1  | 19 |
| 19  | 0  | 2  |
| 26  | 1  | 17 |
| 10  | 6  | 36 |
| 15  | 2  | 8  |
| 36  | 1  | 0  |
| 5   | 0  | 3  |
| 26  | 6  | 4  |
| 52  | 4  | 50 |
| 81  | 2  | 4  |
| 31  | 3  | 2  |

|     |    |    |
|-----|----|----|
| 9   | 0  | 2  |
| 87  | 2  | 6  |
| 23  | 3  | 2  |
| 142 | 1  | 0  |
| 39  | 0  | 0  |
| 27  | 11 | 31 |
| 44  | 4  | 2  |
| 30  | 0  | 7  |
| 42  | 1  | 3  |
| 32  | 0  | 9  |
| 57  | 1  | 4  |
| 40  | 0  | 5  |
| 7   | 2  | 1  |
| 93  | 1  | 6  |
| 33  | 8  | 4  |
| 24  | 1  | 15 |
| 7   | 1  | 3  |
| 54  | 4  | 19 |
| 18  | 0  | 5  |
| 12  | 1  | 21 |
| 23  | 2  | 6  |
| 16  | 1  | 7  |
| 2   | 0  | 0  |
| 62  | 3  | 1  |
| 14  | 3  | 1  |
| 39  | 0  | 4  |
| 27  | 3  | 1  |
| 35  | 1  | 4  |
| 15  | 1  | 3  |
| 22  | 2  | 12 |
| 37  | 1  | 5  |
| 59  | 0  | 33 |
| 27  | 3  | 6  |
| 31  | 3  | 2  |
| 6   | 0  | 1  |
| 20  | 1  | 13 |
| 0   | 0  | 0  |
| 22  | 1  | 2  |
| 28  | 0  | 5  |
| 39  | 0  | 0  |
| 14  | 2  | 1  |
| 15  | 2  | 0  |
| 8   | 4  | 2  |
| 30  | 0  | 4  |
| 13  | 2  | 5  |
| 13  | 0  | 4  |
| 4   | 1  | 0  |
| 8   | 3  | 2  |
| 8   | 3  | 2  |
| 14  | 1  | 1  |
| 24  | 2  | 0  |
| 10  | 1  | 1  |
| 6   | 0  | 1  |
| 22  | 3  | 4  |
| 16  | 1  | 4  |
| 21  | 0  | 3  |
| 31  | 2  | 1  |
| 11  | 0  | 1  |
| 10  | 2  | 5  |

|    |   |    |
|----|---|----|
| 11 | 1 | 4  |
| 8  | 0 | 3  |
| 18 | 3 | 2  |
| 1  | 0 | 0  |
| 34 | 0 | 5  |
| 16 | 1 | 0  |
| 13 | 1 | 4  |
| 40 | 2 | 7  |
| 16 | 1 | 0  |
| 16 | 0 | 2  |
| 16 | 0 | 1  |
| 35 | 0 | 1  |
| 21 | 2 | 9  |
| 1  | 0 | 0  |
| 6  | 0 | 3  |
| 32 | 1 | 13 |
| 43 | 0 | 3  |
| 7  | 1 | 1  |
| 4  | 0 | 1  |
| 4  | 0 | 0  |
| 17 | 3 | 2  |
| 11 | 0 | 3  |
| 5  | 1 | 0  |
| 29 | 0 | 1  |
| 14 | 6 | 1  |
| 11 | 4 | 0  |
| 8  | 1 | 0  |
| 9  | 2 | 3  |
| 8  | 0 | 4  |
| 15 | 0 | 7  |
| 10 | 3 | 4  |
| 10 | 1 | 3  |
| 10 | 0 | 3  |
| 4  | 0 | 4  |
| 2  | 0 | 0  |
| 6  | 1 | 1  |
| 3  | 2 | 0  |
| 10 | 0 | 1  |
| 12 | 0 | 3  |
| 6  | 0 | 0  |
| 4  | 0 | 3  |
| 5  | 0 | 2  |
| 15 | 0 | 1  |
| 6  | 0 | 1  |
| 11 | 0 | 1  |
| 4  | 0 | 2  |
| 5  | 1 | 5  |
| 13 | 1 | 2  |
| 13 | 0 | 0  |
| 10 | 0 | 1  |
| 3  | 1 | 3  |
| 17 | 0 | 1  |
| 7  | 1 | 5  |
| 5  | 1 | 2  |
| 12 | 0 | 4  |
| 9  | 0 | 1  |
| 9  | 0 | 0  |
| 5  | 0 | 0  |
| 0  | 1 | 0  |

|    |   |   |
|----|---|---|
| 6  | 0 | 0 |
| 13 | 2 | 3 |
| 16 | 0 | 1 |
| 6  | 0 | 0 |
| 13 | 0 | 1 |
| 4  | 1 | 1 |
| 10 | 0 | 2 |
| 7  | 0 | 3 |
| 7  | 1 | 3 |
| 7  | 0 | 2 |
| 8  | 1 | 3 |
| 0  | 0 | 3 |
| 0  | 0 | 0 |
| 10 | 1 | 3 |
| 15 | 1 | 4 |
| 1  | 3 | 2 |
| 15 | 2 | 1 |
| 11 | 1 | 1 |
| 1  | 0 | 0 |
| 5  | 0 | 5 |
| 1  | 1 | 0 |
| 4  | 0 | 1 |
| 7  | 0 | 0 |
| 13 | 0 | 3 |
| 1  | 1 | 0 |
| 10 | 0 | 1 |
| 11 | 0 | 2 |
| 10 | 0 | 6 |
| 8  | 0 | 0 |
| 2  | 0 | 2 |
| 3  | 1 | 4 |
| 9  | 0 | 0 |
| 12 | 0 | 2 |
| 0  | 1 | 0 |
| 13 | 0 | 0 |
| 8  | 1 | 1 |
| 8  | 0 | 2 |
| 8  | 0 | 2 |
| 3  | 0 | 0 |
| 1  | 0 | 0 |
| 7  | 0 | 3 |
| 7  | 0 | 1 |
| 6  | 0 | 1 |
| 9  | 0 | 0 |
| 2  | 0 | 0 |
| 3  | 0 | 0 |
| 1  | 0 | 0 |
| 1  | 0 | 0 |
| 4  | 0 | 1 |
| 7  | 0 | 2 |
| 12 | 0 | 2 |
| 5  | 2 | 7 |
| 4  | 0 | 0 |
| 0  | 0 | 1 |
| 2  | 0 | 0 |
| 2  | 0 | 1 |
| 2  | 0 | 0 |
| 4  | 1 | 2 |
| 5  | 0 | 0 |

|   |   |   |
|---|---|---|
| 3 | 1 | 0 |
| 1 | 0 | 0 |
| 3 | 0 | 3 |
| 1 | 1 | 1 |
| 7 | 0 | 1 |
| 4 | 0 | 5 |
| 1 | 0 | 0 |
| 3 | 0 | 2 |
| 2 | 0 | 0 |
| 2 | 0 | 0 |
| 3 | 0 | 1 |
| 3 | 0 | 0 |
| 1 | 0 | 0 |
| 4 | 0 | 0 |
| 3 | 0 | 1 |
| 1 | 0 | 0 |
| 0 | 1 | 0 |
| 6 | 0 | 1 |
| 1 | 0 | 0 |
| 0 | 0 | 0 |
| 3 | 0 | 0 |
| 6 | 1 | 2 |
| 4 | 0 | 0 |
| 2 | 0 | 1 |
| 5 | 0 | 0 |
| 3 | 0 | 0 |
| 7 | 0 | 0 |
| 0 | 0 | 0 |
| 4 | 0 | 2 |
| 0 | 0 | 0 |
| 3 | 0 | 0 |
| 4 | 0 | 0 |
| 0 | 0 | 0 |
| 2 | 0 | 5 |
| 0 | 0 | 1 |
| 4 | 0 | 0 |
| 2 | 0 | 0 |
| 0 | 0 | 0 |
| 0 | 0 | 0 |
| 6 | 0 | 0 |
| 2 | 0 | 1 |
| 1 | 0 | 1 |
| 3 | 0 | 2 |
| 0 | 1 | 3 |
| 0 | 0 | 0 |
| 0 | 0 | 0 |
| 0 | 0 | 0 |
| 0 | 0 | 1 |
| 1 | 0 | 0 |
| 0 | 0 | 2 |
| 3 | 0 | 0 |
| 0 | 0 | 0 |
| 3 | 0 | 0 |
| 2 | 0 | 2 |
| 2 | 0 | 0 |
| 0 | 0 | 0 |
| 0 | 0 | 0 |
| 1 | 0 | 0 |
| 5 | 2 | 2 |

|   |   |   |
|---|---|---|
| 4 | 0 | 0 |
| 2 | 1 | 0 |
| 0 | 0 | 1 |
| 3 | 0 | 2 |
| 0 | 0 | 0 |
| 0 | 0 | 0 |
| 4 | 0 | 1 |
| 0 | 0 | 0 |
| 1 | 0 | 2 |
| 4 | 0 | 3 |
| 1 | 0 | 0 |
| 5 | 0 | 2 |
| 1 | 0 | 0 |
| 1 | 0 | 1 |
| 2 | 0 | 0 |
| 5 | 0 | 0 |
| 2 | 0 | 0 |
| 2 | 0 | 1 |
| 3 | 0 | 0 |
| 3 | 0 | 0 |
| 5 | 0 | 1 |
| 2 | 0 | 0 |
| 1 | 0 | 1 |
| 0 | 0 | 0 |
| 1 | 0 | 0 |
| 4 | 1 | 0 |
| 0 | 0 | 0 |
| 1 | 0 | 0 |
| 1 | 0 | 2 |
| 0 | 0 | 0 |
| 1 | 0 | 0 |
| 1 | 0 | 1 |
| 1 | 0 | 0 |
| 0 | 0 | 0 |
| 0 | 0 | 0 |
| 0 | 0 | 0 |
| 0 | 0 | 0 |
| 0 | 0 | 0 |
| 3 | 0 | 0 |
| 0 | 0 | 0 |
| 1 | 1 | 1 |
| 5 | 0 | 0 |
| 2 | 0 | 0 |
| 1 | 0 | 0 |
| 0 | 0 | 0 |
| 0 | 0 | 0 |
| 1 | 1 | 0 |
| 2 | 0 | 0 |
| 0 | 0 | 0 |
| 1 | 0 | 0 |
| 1 | 1 | 1 |
| 0 | 0 | 3 |
| 0 | 0 | 0 |
| 1 | 0 | 0 |
| 1 | 0 | 0 |
| 0 | 0 | 0 |
| 1 | 0 | 0 |
| 0 | 0 | 0 |
| 4 | 0 | 0 |
| 1 | 0 | 0 |



|   |   |   |
|---|---|---|
| 1 | 0 | 0 |
| 0 | 0 | 0 |
| 1 | 0 | 0 |
| 7 | 0 | 0 |
| 1 | 0 | 0 |
| 0 | 0 | 0 |
| 3 | 0 | 1 |
| 2 | 0 | 1 |
| 3 | 0 | 0 |
| 0 | 0 | 1 |
| 3 | 0 | 0 |
| 0 | 0 | 0 |
| 4 | 0 | 0 |
| 0 | 0 | 1 |
| 4 | 0 | 0 |
| 3 | 0 | 0 |
| 2 | 1 | 0 |
| 2 | 0 | 1 |
| 0 | 0 | 0 |
| 2 | 0 | 0 |
| 1 | 0 | 1 |
| 1 | 0 | 0 |
| 0 | 0 | 0 |
| 2 | 0 | 0 |
| 1 | 0 | 0 |
| 3 | 0 | 1 |
| 3 | 0 | 0 |
| 0 | 0 | 0 |
| 1 | 0 | 0 |
| 0 | 0 | 0 |
| 0 | 0 | 0 |
| 0 | 0 | 0 |
| 1 | 0 | 0 |
| 1 | 0 | 0 |
| 0 | 0 | 0 |
| 3 | 0 | 4 |
| 1 | 0 | 0 |
| 4 | 0 | 1 |

|         |       |        |
|---------|-------|--------|
| 0.59    | 0.75  | 0.23   |
| 12      | 8     | 23     |
| 1       | 1     | 1      |
| 4       | 5     | 6      |
| 4       | 5     | 6      |
| A_4     | B_29  | B_32   |
| UC      | UC    | UC     |
| 1969971 | 71054 | 356562 |
| UC      | UC    | UC     |
| 1083588 | 3861  | 165954 |
| 51322   | 11755 | 17347  |
| 49632   | 10912 | 11202  |
| 143882  | 10803 | 37642  |
| 65367   | 4310  | 19686  |

|       |      |       |
|-------|------|-------|
| 34942 | 3715 | 6653  |
| 36120 | 5832 | 16299 |
| 7608  | 150  | 126   |
| 37604 | 180  | 2890  |
| 80209 | 824  | 7519  |
| 50730 | 561  | 12213 |
| 26927 | 928  | 3540  |
| 33640 | 1497 | 4451  |
| 40345 | 1133 | 4350  |
| 8967  | 606  | 2342  |
| 9272  | 108  | 7215  |
| 6907  | 819  | 1156  |
| 11271 | 730  | 1114  |
| 6868  | 276  | 730   |
| 9093  | 357  | 2828  |
| 7556  | 409  | 1372  |
| 16114 | 186  | 725   |
| 5128  | 56   | 2398  |
| 4274  | 416  | 265   |
| 3875  | 440  | 703   |
| 12666 | 44   | 840   |
| 7317  | 230  | 1234  |
| 5860  | 73   | 129   |
| 5305  | 543  | 946   |
| 4367  | 84   | 1462  |
| 3309  | 233  | 444   |
| 8149  | 372  | 1040  |
| 2955  | 125  | 312   |
| 838   | 136  | 309   |
| 3526  | 493  | 855   |
| 7659  | 1914 | 922   |
| 2236  | 306  | 643   |
| 3355  | 505  | 980   |
| 3451  | 352  | 1148  |
| 4517  | 43   | 749   |
| 2457  | 357  | 182   |
| 2054  | 174  | 886   |
| 3384  | 321  | 560   |
| 808   | 58   | 105   |
| 2367  | 394  | 221   |
| 2546  | 83   | 726   |
| 1557  | 57   | 619   |
| 3411  | 52   | 398   |
| 1115  | 4    | 77    |
| 421   | 7    | 351   |
| 909   | 98   | 365   |
| 602   | 338  | 218   |
| 1823  | 107  | 276   |
| 1682  | 32   | 270   |
| 1231  | 1    | 339   |
| 254   | 3    | 26    |
| 1262  | 125  | 228   |
| 758   | 56   | 150   |
| 1404  | 144  | 571   |
| 1169  | 299  | 252   |
| 801   | 64   | 199   |
| 509   | 35   | 162   |
| 164   | 11   | 33    |
| 32    | 4    | 13    |

|      |    |     |
|------|----|-----|
| 1947 | 14 | 603 |
| 792  | 58 | 64  |
| 310  | 20 | 26  |
| 547  | 21 | 26  |
| 588  | 54 | 35  |
| 1901 | 39 | 23  |
| 385  | 96 | 711 |
| 1954 | 32 | 277 |
| 346  | 20 | 55  |
| 1125 | 0  | 78  |
| 361  | 70 | 53  |
| 354  | 31 | 225 |
| 666  | 1  | 112 |
| 248  | 60 | 60  |
| 449  | 77 | 221 |
| 176  | 93 | 154 |
| 1112 | 31 | 74  |
| 504  | 2  | 94  |
| 550  | 58 | 171 |
| 73   | 9  | 77  |
| 276  | 13 | 48  |
| 272  | 8  | 36  |
| 416  | 39 | 181 |
| 286  | 16 | 12  |
| 296  | 28 | 155 |
| 436  | 42 | 126 |
| 238  | 11 | 62  |
| 23   | 1  | 5   |
| 559  | 4  | 70  |
| 225  | 8  | 28  |
| 78   | 5  | 15  |
| 128  | 31 | 65  |
| 165  | 33 | 183 |
| 306  | 4  | 62  |
| 339  | 28 | 34  |
| 57   | 7  | 16  |
| 343  | 13 | 2   |
| 196  | 7  | 71  |
| 210  | 29 | 140 |
| 373  | 17 | 52  |
| 318  | 9  | 49  |
| 240  | 3  | 11  |
| 101  | 28 | 28  |
| 91   | 71 | 55  |
| 196  | 14 | 32  |
| 121  | 6  | 12  |
| 104  | 6  | 9   |
| 230  | 9  | 18  |
| 144  | 7  | 10  |
| 306  | 9  | 10  |
| 92   | 19 | 22  |
| 285  | 8  | 40  |
| 91   | 1  | 25  |
| 114  | 16 | 34  |
| 114  | 16 | 34  |
| 140  | 41 | 15  |
| 285  | 2  | 25  |
| 234  | 4  | 49  |
| 53   | 0  | 9   |

|     |    |     |
|-----|----|-----|
| 128 | 4  | 13  |
| 7   | 1  | 2   |
| 134 | 22 | 102 |
| 77  | 14 | 14  |
| 100 | 2  | 16  |
| 68  | 14 | 5   |
| 179 | 23 | 18  |
| 51  | 2  | 0   |
| 82  | 3  | 25  |
| 47  | 2  | 21  |
| 85  | 29 | 22  |
| 93  | 0  | 9   |
| 43  | 5  | 41  |
| 102 | 2  | 27  |
| 197 | 2  | 3   |
| 127 | 3  | 12  |
| 69  | 8  | 10  |
| 119 | 3  | 50  |
| 55  | 8  | 9   |
| 112 | 6  | 22  |
| 60  | 12 | 25  |
| 8   | 0  | 2   |
| 151 | 0  | 18  |
| 108 | 9  | 35  |
| 37  | 4  | 8   |
| 114 | 16 | 34  |
| 129 | 12 | 7   |
| 32  | 0  | 3   |
| 69  | 2  | 4   |
| 33  | 0  | 7   |
| 75  | 5  | 27  |
| 22  | 0  | 2   |
| 99  | 4  | 15  |
| 49  | 2  | 1   |
| 33  | 2  | 2   |
| 71  | 3  | 3   |
| 258 | 1  | 5   |
| 4   | 0  | 8   |
| 66  | 4  | 6   |
| 55  | 8  | 18  |
| 46  | 3  | 6   |
| 30  | 4  | 6   |
| 141 | 0  | 34  |
| 47  | 9  | 4   |
| 23  | 2  | 14  |
| 5   | 1  | 1   |
| 115 | 0  | 8   |
| 0   | 4  | 6   |
| 93  | 0  | 25  |
| 65  | 2  | 27  |
| 33  | 11 | 23  |
| 18  | 1  | 6   |
| 37  | 9  | 9   |
| 18  | 14 | 28  |
| 25  | 1  | 20  |
| 59  | 3  | 2   |
| 15  | 4  | 3   |
| 81  | 1  | 0   |
| 19  | 0  | 2   |

|     |    |    |
|-----|----|----|
| 26  | 4  | 2  |
| 25  | 2  | 1  |
| 33  | 4  | 5  |
| 68  | 1  | 19 |
| 19  | 0  | 2  |
| 26  | 1  | 17 |
| 10  | 6  | 36 |
| 15  | 2  | 8  |
| 36  | 1  | 0  |
| 5   | 0  | 3  |
| 26  | 6  | 4  |
| 52  | 4  | 50 |
| 81  | 2  | 4  |
| 31  | 3  | 2  |
| 9   | 0  | 2  |
| 87  | 2  | 6  |
| 23  | 3  | 2  |
| 142 | 1  | 0  |
| 39  | 0  | 0  |
| 27  | 11 | 31 |
| 44  | 4  | 2  |
| 30  | 0  | 7  |
| 42  | 1  | 3  |
| 32  | 0  | 9  |
| 57  | 1  | 4  |
| 40  | 0  | 5  |
| 7   | 2  | 1  |
| 93  | 1  | 6  |
| 33  | 8  | 4  |
| 24  | 1  | 15 |
| 7   | 1  | 3  |
| 54  | 4  | 19 |
| 18  | 0  | 5  |
| 12  | 1  | 21 |
| 23  | 2  | 6  |
| 16  | 1  | 7  |
| 2   | 0  | 0  |
| 62  | 3  | 1  |
| 14  | 3  | 1  |
| 39  | 0  | 4  |
| 27  | 3  | 1  |
| 35  | 1  | 4  |
| 15  | 1  | 3  |
| 22  | 2  | 12 |
| 37  | 1  | 5  |
| 59  | 0  | 33 |
| 27  | 3  | 6  |
| 31  | 3  | 2  |
| 6   | 0  | 1  |
| 20  | 1  | 13 |
| 0   | 0  | 0  |
| 22  | 1  | 2  |
| 28  | 0  | 5  |
| 39  | 0  | 0  |
| 14  | 2  | 1  |
| 15  | 2  | 0  |
| 8   | 4  | 2  |
| 30  | 0  | 4  |
| 13  | 2  | 5  |

|    |   |    |
|----|---|----|
| 13 | 0 | 4  |
| 4  | 1 | 0  |
| 8  | 3 | 2  |
| 8  | 3 | 2  |
| 14 | 1 | 1  |
| 24 | 2 | 0  |
| 10 | 1 | 1  |
| 6  | 0 | 1  |
| 22 | 3 | 4  |
| 16 | 1 | 4  |
| 21 | 0 | 3  |
| 31 | 2 | 1  |
| 11 | 0 | 1  |
| 10 | 2 | 5  |
| 11 | 1 | 4  |
| 8  | 0 | 3  |
| 18 | 3 | 2  |
| 1  | 0 | 0  |
| 34 | 0 | 5  |
| 16 | 1 | 0  |
| 13 | 1 | 4  |
| 40 | 2 | 7  |
| 16 | 1 | 0  |
| 16 | 0 | 2  |
| 16 | 0 | 1  |
| 35 | 0 | 1  |
| 21 | 2 | 9  |
| 1  | 0 | 0  |
| 6  | 0 | 3  |
| 32 | 1 | 13 |
| 43 | 0 | 3  |
| 7  | 1 | 1  |
| 4  | 0 | 1  |
| 4  | 0 | 0  |
| 17 | 3 | 2  |
| 11 | 0 | 3  |
| 5  | 1 | 0  |
| 29 | 0 | 1  |
| 14 | 6 | 1  |
| 11 | 4 | 0  |
| 8  | 1 | 0  |
| 9  | 2 | 3  |
| 8  | 0 | 4  |
| 15 | 0 | 7  |
| 10 | 3 | 4  |
| 10 | 1 | 3  |
| 10 | 0 | 3  |
| 4  | 0 | 4  |
| 2  | 0 | 0  |
| 6  | 1 | 1  |
| 3  | 2 | 0  |
| 10 | 0 | 1  |
| 12 | 0 | 3  |
| 6  | 0 | 0  |
| 4  | 0 | 3  |
| 5  | 0 | 2  |
| 15 | 0 | 1  |
| 6  | 0 | 1  |
| 11 | 0 | 1  |

|    |   |   |
|----|---|---|
| 4  | 0 | 2 |
| 5  | 1 | 5 |
| 13 | 1 | 2 |
| 13 | 0 | 0 |
| 10 | 0 | 1 |
| 3  | 1 | 3 |
| 17 | 0 | 1 |
| 7  | 1 | 5 |
| 5  | 1 | 2 |
| 12 | 0 | 4 |
| 9  | 0 | 1 |
| 9  | 0 | 0 |
| 5  | 0 | 0 |
| 0  | 1 | 0 |
| 6  | 0 | 0 |
| 13 | 2 | 3 |
| 16 | 0 | 1 |
| 6  | 0 | 0 |
| 13 | 0 | 1 |
| 4  | 1 | 1 |
| 10 | 0 | 2 |
| 7  | 0 | 3 |
| 7  | 1 | 3 |
| 7  | 0 | 2 |
| 8  | 1 | 3 |
| 0  | 0 | 3 |
| 0  | 0 | 0 |
| 10 | 1 | 3 |
| 15 | 1 | 4 |
| 1  | 3 | 2 |
| 15 | 2 | 1 |
| 11 | 1 | 1 |
| 1  | 0 | 0 |
| 5  | 0 | 5 |
| 1  | 1 | 0 |
| 4  | 0 | 1 |
| 7  | 0 | 0 |
| 13 | 0 | 3 |
| 1  | 1 | 0 |
| 10 | 0 | 1 |
| 11 | 0 | 2 |
| 10 | 0 | 6 |
| 8  | 0 | 0 |
| 2  | 0 | 2 |
| 3  | 1 | 4 |
| 9  | 0 | 0 |
| 12 | 0 | 2 |
| 0  | 1 | 0 |
| 13 | 0 | 0 |
| 8  | 1 | 1 |
| 8  | 0 | 2 |
| 8  | 0 | 2 |
| 3  | 0 | 0 |
| 1  | 0 | 0 |
| 7  | 0 | 3 |
| 7  | 0 | 1 |
| 6  | 0 | 1 |
| 9  | 0 | 0 |
| 2  | 0 | 0 |

|    |   |   |
|----|---|---|
| 3  | 0 | 0 |
| 1  | 0 | 0 |
| 1  | 0 | 0 |
| 4  | 0 | 1 |
| 7  | 0 | 2 |
| 12 | 0 | 2 |
| 5  | 2 | 7 |
| 4  | 0 | 0 |
| 0  | 0 | 1 |
| 2  | 0 | 0 |
| 2  | 0 | 1 |
| 2  | 0 | 0 |
| 4  | 1 | 2 |
| 5  | 0 | 0 |
| 3  | 1 | 0 |
| 1  | 0 | 0 |
| 3  | 0 | 3 |
| 1  | 1 | 1 |
| 7  | 0 | 1 |
| 4  | 0 | 5 |
| 1  | 0 | 0 |
| 3  | 0 | 2 |
| 2  | 0 | 0 |
| 2  | 0 | 0 |
| 3  | 0 | 1 |
| 3  | 0 | 0 |
| 1  | 0 | 0 |
| 4  | 0 | 0 |
| 3  | 0 | 1 |
| 1  | 0 | 0 |
| 0  | 1 | 0 |
| 6  | 0 | 1 |
| 1  | 0 | 0 |
| 0  | 0 | 0 |
| 3  | 0 | 0 |
| 6  | 1 | 2 |
| 4  | 0 | 0 |
| 2  | 0 | 1 |
| 5  | 0 | 0 |
| 3  | 0 | 0 |
| 7  | 0 | 0 |
| 0  | 0 | 0 |
| 4  | 0 | 2 |
| 0  | 0 | 0 |
| 3  | 0 | 0 |
| 4  | 0 | 0 |
| 0  | 0 | 0 |
| 2  | 0 | 5 |
| 0  | 0 | 1 |
| 4  | 0 | 0 |
| 2  | 0 | 0 |
| 0  | 0 | 0 |
| 0  | 0 | 0 |
| 6  | 0 | 0 |
| 2  | 0 | 1 |
| 1  | 0 | 1 |
| 3  | 0 | 2 |
| 0  | 1 | 3 |
| 0  | 0 | 0 |





|        |      |       |
|--------|------|-------|
| 1      | 1    | 0     |
| 2      | 0    | 0     |
| 0      | 0    | 0     |
| 1      | 0    | 0     |
| 1      | 1    | 1     |
| 0      | 0    | 3     |
| 0      | 0    | 0     |
| 1      | 0    | 0     |
| 1      | 0    | 0     |
| 0      | 0    | 0     |
| 1      | 0    | 0     |
| 0      | 0    | 0     |
| 4      | 0    | 0     |
| 1      | 0    | 0     |
| 1      | 0    | 0     |
| 0      | 0    | 0     |
| 1      | 0    | 0     |
| 7      | 0    | 0     |
| 1      | 0    | 0     |
| 0      | 0    | 0     |
| 3      | 0    | 1     |
| 2      | 0    | 1     |
| 3      | 0    | 0     |
| 0      | 0    | 1     |
| 3      | 0    | 0     |
| 0      | 0    | 0     |
| 4      | 0    | 0     |
| 0      | 0    | 1     |
| 4      | 0    | 0     |
| 3      | 0    | 0     |
| 2      | 1    | 0     |
| 2      | 0    | 1     |
| 0      | 0    | 0     |
| 2      | 0    | 0     |
| 1      | 0    | 1     |
| 1      | 0    | 0     |
| 0      | 0    | 0     |
| 2      | 0    | 0     |
| 1      | 0    | 0     |
| 3      | 0    | 1     |
| 3      | 0    | 0     |
| 0      | 0    | 0     |
| 1      | 0    | 0     |
| 0      | 0    | 0     |
| 0      | 0    | 0     |
| 0      | 0    | 0     |
| 1      | 0    | 0     |
| 1      | 0    | 0     |
| 0      | 0    | 0     |
| 3      | 0    | 4     |
| 1      | 0    | 0     |
| 4      | 0    | 1     |
| 62225  | 2061 | 11178 |
| 195264 | 3404 | 30332 |
| 399    | 485  | 455   |
| UC     | UC   | UC    |
| UC     | UC   | UC    |

|         |       |        |
|---------|-------|--------|
| 4       | 5     | 6      |
| 4       | 5     | 6      |
| UC      | UC    | UC     |
| A_4     | B_29  | B_32   |
| 1969971 | 71054 | 356562 |
| UC      | UC    | UC     |
| 17.41   | 1.87  | 14.85  |
| 0.82    | 5.70  | 1.55   |
| 0.80    | 5.29  | 1.00   |
| 2.31    | 5.24  | 3.37   |
| 1.05    | 2.09  | 1.76   |
| 0.56    | 1.80  | 0.60   |
| 0.58    | 2.83  | 1.46   |
| 0.12    | 0.07  | 0.01   |
| 0.60    | 0.09  | 0.26   |
| 1.29    | 0.40  | 0.67   |
| 0.82    | 0.27  | 1.09   |
| 0.43    | 0.45  | 0.32   |
| 0.54    | 0.73  | 0.40   |
| 0.65    | 0.55  | 0.39   |
| 0.14    | 0.29  | 0.21   |
| 0.15    | 0.05  | 0.65   |
| 0.11    | 0.40  | 0.10   |
| 0.18    | 0.35  | 0.10   |
| 0.11    | 0.13  | 0.07   |
| 0.15    | 0.17  | 0.25   |
| 0.12    | 0.20  | 0.12   |
| 0.26    | 0.09  | 0.06   |
| 0.08    | 0.03  | 0.21   |
| 0.07    | 0.20  | 0.02   |
| 0.06    | 0.21  | 0.06   |
| 0.20    | 0.02  | 0.08   |
| 0.12    | 0.11  | 0.11   |
| 0.09    | 0.04  | 0.01   |
| 0.09    | 0.26  | 0.08   |
| 0.07    | 0.04  | 0.13   |
| 0.05    | 0.11  | 0.04   |
| 0.13    | 0.18  | 0.09   |
| 0.05    | 0.06  | 0.03   |
| 0.01    | 0.07  | 0.03   |
| 0.06    | 0.24  | 0.08   |
| 0.12    | 0.93  | 0.08   |
| 0.04    | 0.15  | 0.06   |
| 0.05    | 0.24  | 0.09   |
| 0.06    | 0.17  | 0.10   |
| 0.07    | 0.02  | 0.07   |
| 0.04    | 0.17  | 0.02   |
| 0.03    | 0.08  | 0.08   |
| 0.05    | 0.16  | 0.05   |
| 0.01    | 0.03  | 0.01   |
| 0.04    | 0.19  | 0.02   |
| 0.04    | 0.04  | 0.06   |
| 0.03    | 0.03  | 0.06   |
| 0.05    | 0.03  | 0.04   |
| 0.02    | 0.00  | 0.01   |
| 0.01    | 0.00  | 0.03   |
| 0.01    | 0.05  | 0.03   |
| 0.01    | 0.16  | 0.02   |

|      |      |      |
|------|------|------|
| 0.03 | 0.05 | 0.02 |
| 0.03 | 0.02 | 0.02 |
| 0.02 | 0.00 | 0.03 |
| 0.00 | 0.00 | 0.00 |
| 0.02 | 0.06 | 0.02 |
| 0.01 | 0.03 | 0.01 |
| 0.02 | 0.07 | 0.05 |
| 0.02 | 0.15 | 0.02 |
| 0.01 | 0.03 | 0.02 |
| 0.01 | 0.02 | 0.01 |
| 0.00 | 0.01 | 0.00 |
| 0.00 | 0.00 | 0.00 |
| 0.03 | 0.01 | 0.05 |
| 0.01 | 0.03 | 0.01 |
| 0.00 | 0.01 | 0.00 |
| 0.01 | 0.01 | 0.00 |
| 0.01 | 0.03 | 0.00 |
| 0.03 | 0.02 | 0.00 |
| 0.01 | 0.05 | 0.06 |
| 0.03 | 0.02 | 0.02 |
| 0.01 | 0.01 | 0.00 |
| 0.02 | 0.00 | 0.01 |
| 0.01 | 0.03 | 0.00 |
| 0.01 | 0.02 | 0.02 |
| 0.01 | 0.00 | 0.01 |
| 0.00 | 0.03 | 0.01 |
| 0.01 | 0.04 | 0.02 |
| 0.00 | 0.05 | 0.01 |
| 0.02 | 0.02 | 0.01 |
| 0.01 | 0.00 | 0.01 |
| 0.01 | 0.03 | 0.02 |
| 0.00 | 0.00 | 0.01 |
| 0.00 | 0.01 | 0.00 |
| 0.00 | 0.00 | 0.00 |
| 0.01 | 0.02 | 0.02 |
| 0.00 | 0.01 | 0.00 |
| 0.00 | 0.01 | 0.01 |
| 0.01 | 0.02 | 0.01 |
| 0.00 | 0.01 | 0.01 |
| 0.00 | 0.00 | 0.00 |
| 0.01 | 0.00 | 0.01 |
| 0.00 | 0.00 | 0.00 |
| 0.00 | 0.00 | 0.00 |
| 0.00 | 0.02 | 0.01 |
| 0.00 | 0.02 | 0.02 |
| 0.00 | 0.00 | 0.01 |
| 0.01 | 0.01 | 0.00 |
| 0.00 | 0.00 | 0.00 |
| 0.01 | 0.01 | 0.00 |
| 0.00 | 0.00 | 0.01 |
| 0.00 | 0.01 | 0.01 |
| 0.01 | 0.01 | 0.00 |
| 0.01 | 0.00 | 0.00 |
| 0.00 | 0.00 | 0.01 |
| 0.00 | 0.01 | 0.00 |
| 0.00 | 0.03 | 0.00 |
| 0.00 | 0.01 | 0.00 |
| 0.00 | 0.00 | 0.00 |
| 0.00 | 0.00 | 0.00 |







|       |       |       |
|-------|-------|-------|
| 0.03  | -1.00 | -0.66 |
| 1.36  | -0.92 | -0.22 |
| 1.29  | -0.75 | 2.33  |
| -0.53 | -0.37 | -1.57 |
| 1.05  | 2.12  | 0.23  |
| 1.04  | 0.48  | -0.45 |
| -0.35 | 0.34  | -0.04 |
| -0.64 | -1.06 | 1.52  |
| -0.29 | 1.51  | -0.34 |
| -0.33 | 1.38  | -1.13 |
| -0.64 | -0.43 | -1.04 |
| -0.84 | -0.57 | 0.22  |
| -0.58 | 0.66  | -0.55 |
| 1.64  | -0.94 | -1.32 |
| -0.45 | -1.13 | 1.18  |
| -0.48 | 0.78  | -0.90 |
| -0.40 | 0.49  | -0.40 |
| 1.67  | -1.76 | -0.75 |
| -0.33 | -0.42 | -0.44 |
| -0.18 | -0.74 | -0.97 |
| -0.43 | 3.04  | -0.44 |
| -0.75 | -1.43 | 0.67  |
| -0.87 | 0.52  | -1.19 |
| 0.18  | 1.13  | -0.56 |
| -0.18 | 0.02  | -0.48 |
| -0.33 | -0.04 | -0.25 |
| -0.85 | 3.24  | -0.40 |
| -0.12 | 4.79  | -0.37 |
| -0.91 | 0.42  | -0.66 |
| -0.40 | 1.57  | -0.05 |
| -0.53 | 0.86  | 0.04  |
| -0.22 | -0.64 | -0.26 |
| -0.75 | 1.99  | -1.22 |
| -1.07 | 0.47  | 0.32  |
| -0.40 | 3.70  | -0.57 |
| -0.61 | -0.23 | -0.70 |
| -0.52 | 2.74  | -0.91 |
| -0.40 | -0.45 | 1.34  |
| -0.64 | -0.53 | 0.59  |
| 0.17  | -0.81 | -0.47 |
| 0.23  | -0.33 | -0.16 |
| -0.54 | -0.61 | 0.03  |
| -1.12 | 0.66  | -0.15 |
| -0.72 | 3.79  | -0.43 |
| -0.49 | 1.26  | -0.85 |
| -0.11 | -0.71 | -0.26 |
| -0.29 | -1.36 | 0.30  |



|       |       |       |
|-------|-------|-------|
| -0.22 | -0.32 | -0.29 |
| -0.63 | 2.63  | -0.62 |
| -0.98 | 0.26  | -0.88 |
| -0.60 | 2.92  | 1.53  |
| -0.58 | 2.75  | -0.48 |
| -0.94 | 0.52  | -0.54 |
| -1.15 | -0.42 | -0.62 |
| -0.52 | -0.31 | -0.50 |
| -0.27 | -0.21 | -0.24 |
| 0.11  | -1.30 | 1.41  |
| -0.36 | 1.12  | -1.04 |
| -0.52 | -0.18 | -0.72 |
| -0.16 | -0.02 | -0.80 |
| -0.38 | 1.53  | -1.10 |
| -0.03 | -0.18 | -0.40 |
| -1.08 | 1.76  | 2.96  |
| 1.09  | -0.48 | 0.43  |
| -0.42 | -0.04 | -0.48 |
| 0.55  | -1.82 | -0.91 |
| -0.65 | 2.85  | -0.78 |
| -0.95 | -0.18 | 0.24  |
| -0.46 | -1.70 | -0.54 |
| -0.46 | 0.21  | -0.42 |
| -0.95 | 1.81  | 0.20  |
| -1.12 | 2.84  | -0.09 |
| 1.35  | 0.79  | -0.86 |
| -0.60 | -1.62 | -0.56 |
| -0.71 | 1.07  | -0.12 |
| -0.46 | -0.31 | -0.19 |
| -0.59 | -0.27 | -0.61 |
| -0.78 | -0.87 | -0.98 |
| -1.30 | 1.15  | 0.60  |
| -0.25 | 0.27  | -0.83 |
| -0.96 | 1.38  | 1.46  |
| -0.60 | 1.06  | -0.07 |
| -1.06 | -0.67 | -0.61 |
| -0.25 | -0.22 | -0.23 |
| 0.62  | -1.25 | -0.10 |
| -0.43 | -0.38 | -0.66 |
| -0.46 | -0.24 | -0.44 |
| -0.78 | 1.80  | -0.03 |
| -1.25 | 1.93  | 2.02  |
| -0.77 | -1.91 | -0.53 |
| -0.45 | 1.49  | -1.03 |
| -0.60 | -0.03 | -0.48 |
| -0.06 | 0.08  | -0.99 |
| -0.74 | -0.64 | 0.55  |
| -0.89 | 1.39  | 1.06  |

|       |       |       |
|-------|-------|-------|
| -0.20 | -0.01 | -0.31 |
| 0.17  | -0.08 | -0.08 |
| 0.13  | -0.56 | -0.70 |
| -1.14 | 2.46  | -0.88 |
| -0.76 | 4.06  | -0.25 |
| -0.19 | 0.96  | -0.28 |
| -0.60 | -0.24 | -0.93 |
| -0.91 | -0.47 | -1.21 |
| -0.51 | -0.17 | -1.56 |
| -0.60 | -0.24 | -1.07 |
| 0.65  | 0.43  | -0.97 |
| -0.93 | 1.96  | -0.74 |
| -0.11 | -0.41 | -0.54 |
| -1.10 | -1.73 | -0.61 |
| -0.58 | 1.93  | -0.07 |
| -0.58 | 1.93  | -0.07 |
| -0.58 | 4.31  | -0.83 |
| 0.36  | -0.93 | -0.48 |
| 0.24  | -0.87 | 0.62  |
| -0.66 | -0.96 | -0.67 |
| -0.29 | -0.34 | -0.69 |
| -0.35 | -0.22 | -0.33 |
| -0.74 | 2.95  | 2.28  |
| -0.78 | 1.98  | -0.77 |
| -0.69 | -1.02 | -0.78 |
| -0.77 | 1.23  | -1.00 |
| -0.16 | 1.71  | -0.45 |
| -0.41 | -0.35 | -0.76 |
| -0.69 | -0.58 | 0.02  |
| -1.00 | -0.84 | -0.20 |
| -0.57 | 4.45  | -0.33 |
| 0.00  | -0.86 | -0.40 |
| -1.41 | 0.11  | 1.20  |

---

| 1                     | 2                      | 3                      |
|-----------------------|------------------------|------------------------|
| 1                     | 3                      | 4                      |
| TATTGCACTTGTCCCGCCTGT | CAACGGAATCCCAAAGCAGCTG | TCTCCCAACCCTTGTACCAGTG |
| miR-92a-3p            | miR-191-5p             | miR-150-5p             |
| 46389442              | 10497180               | 8994745                |
| 1.23                  | -0.77                  | -0.63                  |
| -1.76                 | 3.44                   | -0.49                  |
| 0.00                  | -0.58                  | -1.27                  |
| 1.30                  | -0.72                  | -0.99                  |
| -2.19                 | 0.71                   | 2.40                   |
| 0.72                  | -0.50                  | -0.83                  |
| 0.63                  | -0.74                  | 0.28                   |
| 1.28                  | -0.53                  | 0.32                   |
| 1.11                  | -0.06                  | -1.21                  |
| 0.95                  | -0.19                  | -0.67                  |
| -0.09                 | 0.29                   | -0.36                  |
| 0.50                  | -0.81                  | 3.01                   |
| -1.08                 | -0.57                  | -0.41                  |
| 1.05                  | -0.55                  | 0.47                   |
| 0.13                  | 0.07                   | -0.71                  |
| -0.52                 | -0.14                  | 0.03                   |
| -0.04                 | -0.02                  | 0.22                   |
| -0.01                 | -0.53                  | 0.35                   |
| -0.50                 | 0.88                   | -0.09                  |
| -0.90                 | -0.49                  | -0.49                  |

|       |       |       |
|-------|-------|-------|
| 0.82  | -0.47 | -0.62 |
| 0.08  | -0.34 | 1.20  |
| 0.16  | -0.34 | 0.60  |
| 0.71  | -0.55 | 0.35  |
| -1.88 | 2.64  | -0.41 |
| -1.11 | 0.82  | 0.78  |
| -0.60 | 0.06  | -0.82 |
| -1.04 | -0.73 | -1.39 |
| 0.35  | -0.02 | -0.78 |
| 0.96  | 0.40  | -1.14 |
| 0.86  | 0.80  | -1.30 |
| -1.14 | 1.55  | -1.18 |
| -2.35 | 0.91  | -0.42 |
| 1.20  | -0.55 | -0.91 |
| 0.88  | -0.20 | -0.62 |
| 0.16  | -0.61 | 2.79  |
| 2.69  | -0.85 | -1.13 |
| 0.15  | -0.66 | 0.68  |
| -1.17 | -0.72 | -0.62 |
| -0.53 | -0.26 | 2.94  |
| 0.64  | -0.64 | 0.64  |
| -1.46 | -0.61 | 1.75  |
| 0.61  | -0.28 | 0.42  |
| 0.02  | -0.14 | -0.64 |
| 0.61  | 0.28  | 1.22  |
| 1.17  | -0.78 | -0.31 |
| -1.08 | 0.36  | 0.20  |
| -0.05 | -0.28 | 0.48  |
| 0.21  | -0.29 | 0.19  |
| -0.15 | -0.37 | 2.45  |
| -0.52 | -0.31 | 1.54  |
| 0.27  | 0.20  | 0.46  |
| 0.95  | -0.06 | -1.06 |
| -0.39 | 0.14  | 0.27  |
| 0.87  | -0.21 | -0.33 |
| 0.59  | 0.14  | -0.23 |
| 0.52  | -0.27 | -0.15 |
| -1.52 | -0.61 | -0.81 |
| -0.77 | -0.03 | 1.47  |
| -1.80 | 0.48  | 0.36  |
| -2.04 | 0.42  | 1.88  |
| -1.24 | -0.54 | -1.08 |
| 0.73  | -0.22 | -0.23 |
| 0.30  | -0.32 | -0.06 |
| -0.59 | -0.10 | -0.96 |
| 0.21  | -0.81 | -1.09 |
| 0.01  | -0.78 | -1.33 |
| -0.84 | 2.04  | -0.90 |
| -1.38 | -0.54 | -0.48 |
| -1.06 | -0.36 | -0.25 |
| 1.33  | -0.73 | -0.74 |
| -1.59 | -0.94 | 5.34  |
| 0.61  | -0.65 | -0.74 |
| -0.35 | -0.66 | 1.06  |
| 0.15  | -0.81 | 2.20  |
| -0.16 | -0.57 | 0.99  |
| -0.60 | 1.00  | 0.65  |
| -0.32 | 1.12  | -0.39 |
| -0.87 | 0.08  | -0.71 |

|       |       |       |
|-------|-------|-------|
| -1.20 | 0.58  | -0.81 |
| 0.04  | 0.86  | -0.78 |
| -0.75 | 0.14  | 0.59  |
| 0.11  | -0.39 | 3.40  |
| -1.40 | -0.58 | -0.28 |
| -1.59 | -0.68 | -1.11 |
| 0.10  | -0.19 | 1.55  |
| -0.64 | -0.07 | 1.55  |
| 0.04  | -0.30 | 1.16  |
| -0.33 | 0.03  | -0.60 |
| -0.22 | 0.18  | 1.32  |
| -1.06 | -0.16 | -1.27 |
| 1.05  | -0.17 | -0.25 |
| 0.04  | -0.31 | 0.12  |
| -0.64 | 1.06  | -1.24 |
| -0.22 | -0.22 | -0.70 |

|      |      |      |
|------|------|------|
| 0    | 1    | 0    |
| 0.00 | 0.00 | 0.00 |
| 1.00 | 1.00 | 1.00 |
| 0.17 | 0.79 | 0.72 |

| 1                     | 2                       | 3                       |
|-----------------------|-------------------------|-------------------------|
| TATTGCACTTGTCCCGCCTGT | CAACGGAATCCCAAAAGCAGCTG | TCTCCCAACCCCTTGTACCAGTG |
| miR-92a-3p            | miR-191-5p              | miR-150-5p              |
| 46389442              | 10497180                | 8994745                 |
| 1.23                  | -0.77                   | -0.63                   |
| -1.76                 | 3.44                    | -0.49                   |
| 0.00                  | -0.58                   | -1.27                   |
| 1.30                  | -0.72                   | -0.99                   |
| -2.19                 | 0.71                    | 2.40                    |
| 0.72                  | -0.50                   | -0.83                   |
| 0.63                  | -0.74                   | 0.28                    |
| 1.28                  | -0.53                   | 0.32                    |
| 1.11                  | -0.06                   | -1.21                   |
| 0.95                  | -0.19                   | -0.67                   |
| -0.09                 | 0.29                    | -0.36                   |
| 0.50                  | -0.81                   | 3.01                    |
| -1.08                 | -0.57                   | -0.41                   |
| 1.05                  | -0.55                   | 0.47                    |
| 0.13                  | 0.07                    | -0.71                   |
| -0.52                 | -0.14                   | 0.03                    |
| -0.04                 | -0.02                   | 0.22                    |
| -0.01                 | -0.53                   | 0.35                    |
| -0.50                 | 0.88                    | -0.09                   |
| -0.90                 | -0.49                   | -0.49                   |
| 0.82                  | -0.47                   | -0.62                   |
| 0.08                  | -0.34                   | 1.20                    |
| 0.16                  | -0.34                   | 0.60                    |
| 0.71                  | -0.55                   | 0.35                    |
| -1.88                 | 2.64                    | -0.41                   |
| -1.11                 | 0.82                    | 0.78                    |
| -0.60                 | 0.06                    | -0.82                   |
| -1.04                 | -0.73                   | -1.39                   |

|       |       |       |
|-------|-------|-------|
| 0.35  | -0.02 | -0.78 |
| 0.96  | 0.40  | -1.14 |
| 0.86  | 0.80  | -1.30 |
| -1.14 | 1.55  | -1.18 |
| -2.35 | 0.91  | -0.42 |
| 1.20  | -0.55 | -0.91 |
| 0.88  | -0.20 | -0.62 |
| 0.16  | -0.61 | 2.79  |
| 2.60  | 0.85  | 1.12  |

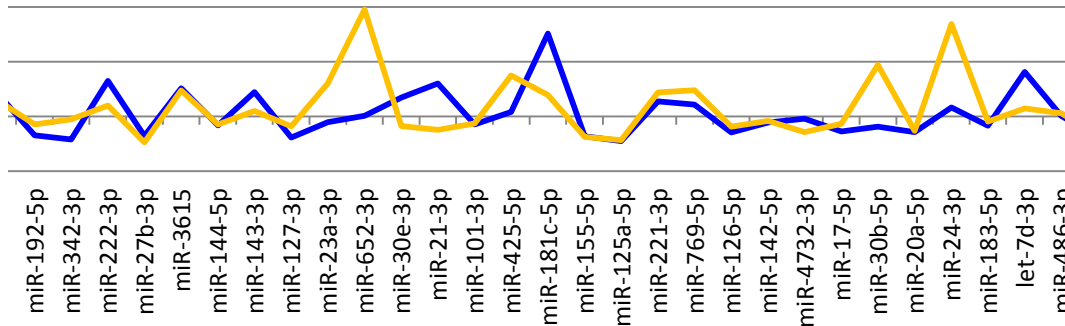

|            |            |            |            |          |            |            |            |            |            |            |           |            |            |             |            |             |            |            |            |            |             |           |            |            |           |            |           |            |       |       |       |       |
|------------|------------|------------|------------|----------|------------|------------|------------|------------|------------|------------|-----------|------------|------------|-------------|------------|-------------|------------|------------|------------|------------|-------------|-----------|------------|------------|-----------|------------|-----------|------------|-------|-------|-------|-------|
| miR-192-5p | miR-342-3p | miR-222-3p | miR-27b-3p | miR-3615 | miR-144-5p | miR-143-3p | miR-127-3p | miR-23a-3p | miR-652-3p | miR-30e-3p | miR-21-3p | miR-101-3p | miR-425-5p | miR-181c-5p | miR-155-5p | miR-125a-5p | miR-221-3p | miR-769-5p | miR-126-5p | miR-142-5p | miR-4732-3p | miR-17-5p | miR-30b-5p | miR-20a-5p | miR-24-3p | miR-183-5p | let-7d-3p | miR-486-3p |       |       |       |       |
| 0.57       | 0.59       | 0.52       | -1.52      | -0.77    | -1.80      | -2.04      | -1.24      | 0.73       | 0.30       | -0.59      | 0.21      | 0.01       | -0.84      | -1.38       | -1.06      | 1.33        | -1.59      | 0.61       | -0.35      | 0.15       | -0.16       | -0.60     | -0.32      | -0.87      | -1.20     | 0.04       | -0.75     | 0.11       | -1.40 | -1.59 | 0.10  | -0.64 |
| 0.21       | 0.14       | -0.27      | -0.61      | -0.03    | 0.48       | 0.42       | -0.54      | -0.22      | -0.32      | -0.10      | -0.81     | -0.78      | 2.04       | -0.54       | -0.36      | -0.73       | -0.94      | -0.65      | -0.66      | -0.81      | -0.57       | 1.00      | 1.12       | 0.08       | 0.58      | 0.86       | 0.14      | -0.39      | -0.58 | -0.68 | -0.19 | -0.07 |
| 0.55       | -0.23      | -0.15      | -0.81      | 1.47     | 0.36       | 1.88       | -1.08      | -0.23      | -0.06      | -0.96      | -1.09     | -1.33      | -0.90      | -0.48       | -0.25      | -0.74       | 5.34       | -0.74      | 1.06       | 2.20       | 0.99        | 0.65      | -0.39      | -0.71      | -0.81     | -0.78      | 0.59      | 3.40       | -0.28 | -1.11 | 1.55  | 1.55  |

|       |       |       |
|-------|-------|-------|
| 0.04  | -0.30 | 1.16  |
| -0.33 | 0.03  | -0.60 |
| -0.22 | 0.18  | 1.32  |
| -1.06 | -0.16 | -1.27 |
| 1.05  | -0.17 | -0.25 |
| 0.04  | -0.31 | 0.12  |
| -0.64 | 1.06  | -1.24 |
| 0     | 0     | -1    |

---

| 1                      | 2                      | 3                       |
|------------------------|------------------------|-------------------------|
| 25                     | 134                    | 59                      |
| TGAGAACTGAATTCCATAGGCT | CACGCTCATGCACACACCCACA | TTAATGCTAATCGTGATAGGGGT |
| miR-146b-5p            | miR-574-3p             | miR-155-5p              |
| 614674                 | 10799                  | 122415                  |
| -0.58                  | 0.38                   | 1.04                    |
| 2.00                   | 0.14                   | 0.07                    |
| 0.04                   | -0.52                  | -0.49                   |
| -0.40                  | -0.57                  | -0.60                   |
| 0.49                   | 4.45                   | 2.92                    |
| -0.40                  | -0.33                  | 1.53                    |
| -0.68                  | 0.07                   | 0.89                    |
| -0.71                  | -0.43                  | -1.16                   |
| -0.23                  | -0.33                  | -1.52                   |
| 0.81                   | 0.30                   | -0.63                   |
| 3.99                   | -0.62                  | -0.39                   |
| -0.56                  | -0.95                  | 0.37                    |
| 0.27                   | 0.59                   | 0.30                    |
| -0.63                  | -0.28                  | -0.73                   |
| -0.41                  | -0.22                  | -0.20                   |
| -0.20                  | -0.35                  | 0.31                    |
| -0.47                  | 0.70                   | -0.36                   |
| -0.49                  | 0.99                   | -0.07                   |
| 0.20                   | -0.33                  | 0.33                    |
| 0.70                   | -0.38                  | -0.63                   |
| -0.37                  | -0.58                  | 0.53                    |
| -0.63                  | 0.03                   | -0.54                   |
| -0.62                  | -0.04                  | -0.13                   |
| -0.64                  | -0.17                  | -0.04                   |
| -0.41                  | -0.36                  | -1.33                   |
| -0.03                  | -0.30                  | 1.75                    |
| -0.05                  | -0.88                  | -1.24                   |
| 1.67                   | -0.70                  | -1.08                   |
| 2.81                   | -0.58                  | -0.07                   |
| 1.13                   | -0.79                  | -0.17                   |
| -0.57                  | -0.30                  | -1.06                   |
| 6.40                   | -0.53                  | -0.69                   |
| 0.09                   | 2.24                   | -0.93                   |
| -0.67                  | 0.15                   | -0.74                   |
| -0.67                  | 0.16                   | -0.75                   |
| -0.36                  | 0.15                   | 1.14                    |
| -0.75                  | -0.72                  | -1.82                   |

---

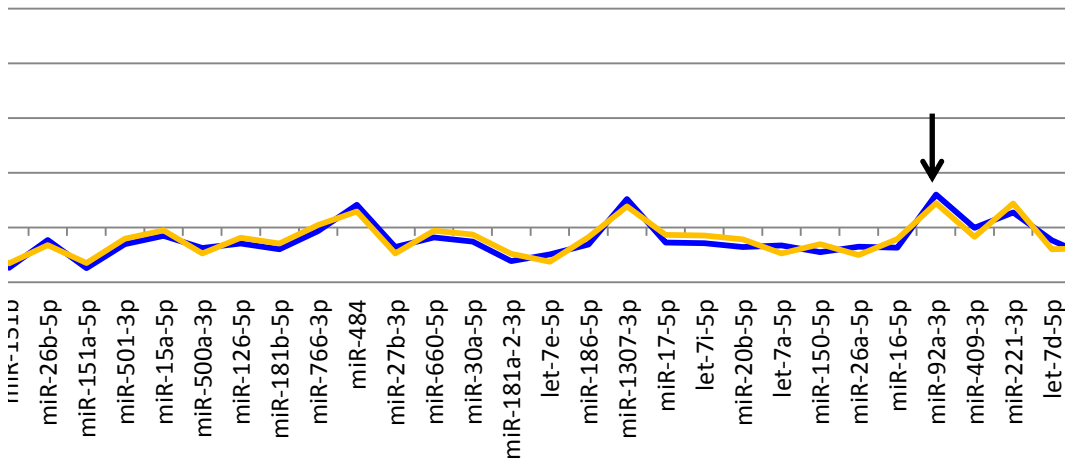

|       |       |       |
|-------|-------|-------|
| 0.57  |       | 0.22  |
| -0.57 | 0.13  | -0.44 |
| -0.49 | -0.35 | 0.04  |
| 1.14  | -0.92 | 0.09  |
| 0.02  | -0.48 | 1.22  |
| 0.10  | -0.35 | 2.41  |
| 0.77  | -0.12 | 1.71  |
| 0.53  | -0.84 | -1.37 |
| -0.61 | -0.38 | -0.63 |
| -0.38 | -0.90 | -0.43 |
| 0.69  | -0.84 | -0.98 |
| -0.14 | -0.82 | -0.21 |
| 0.02  | -0.30 | -0.92 |
| 1.40  | 0.82  | 1.08  |
| -0.39 | 0.27  | 0.26  |
| 0.36  | 0.46  | 1.59  |
| -0.49 | -0.39 | -0.31 |
| 0.49  | -0.61 | -1.09 |
| -0.32 | -0.56 | -0.63 |
| 1.01  | -0.49 | 0.63  |
| -0.71 | 8.27  | -1.36 |
| -0.29 | -0.51 | 0.56  |
| 1.03  | -0.76 | 0.93  |
| 0.87  | -0.71 | 0.30  |
| 0.96  | 0.35  | 0.19  |
| 0.48  | 0.09  | -0.16 |
| -0.52 | 0.60  | -1.42 |
| 0.20  | -0.01 | 0.91  |
| -0.57 | -0.53 | -0.04 |
| 1.68  | -0.14 | 0.21  |
| 0.83  | -0.74 | -1.29 |
| -0.44 | 0.77  | -0.94 |
| -0.11 | -0.12 | 0.30  |
| -0.48 | -0.32 | 0.25  |
| 0.85  | -0.09 | 0.16  |
| -0.21 | 0.58  | 0.31  |
| 3.24  | -0.87 | -0.19 |
| -0.56 | -0.48 | 0.38  |
| -0.55 | 0.22  | -0.30 |
| 0.45  | -0.84 | -0.89 |
| -0.05 | -0.31 | 0.16  |
| 0.00  | 0.01  | 0.02  |
| 0.00  | 0.03  | 0.01  |

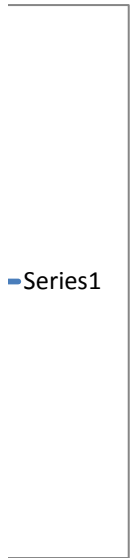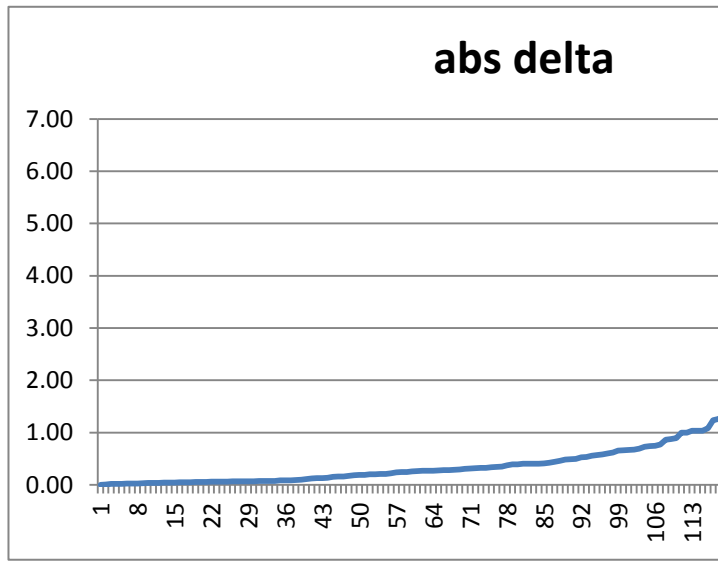











































































































































































356562

1363063

824884

|        |         |         |
|--------|---------|---------|
| 7      | 8       | 9       |
| 7      | 8       | 9       |
| B_32   | B_34    | C_1     |
| UC     | UC      | UC      |
| 793095 | 2416278 | 2851220 |
| 0.64   | 0.61    | 0.04    |
| B_32   | B_34    | C_1     |
| 436533 | 1053215 | 2026336 |
| 165954 | 611778  | 445855  |
| 17347  | 31223   | 37854   |
| 11202  | 105091  | 65314   |
| 37642  | 120189  | 45388   |
| 19686  | 131474  | 70868   |
| 6653   | 7446    | 5218    |
| 16299  | 33009   | 14027   |
| 126    | 913     | 844     |
| 2890   | 8942    | 3676    |
| 7519   | 15831   | 8819    |
| 12213  | 33498   | 5755    |
| 3540   | 22347   | 14870   |
| 4451   | 25473   | 3000    |
| 4350   | 16799   | 14150   |
| 2342   | 3788    | 838     |
| 7215   | 35649   | 9765    |
| 1156   | 4464    | 802     |
| 1114   | 8136    | 2552    |
| 730    | 2501    | 2161    |
| 2828   | 10410   | 3362    |
| 1372   | 8427    | 3475    |
| 725    | 7142    | 2556    |
| 2398   | 4485    | 1504    |
| 265    | 652     | 702     |
| 703    | 614     | 255     |
| 840    | 4063    | 2120    |
| 1234   | 8635    | 3018    |
| 129    | 1193    | 462     |
| 946    | 2888    | 721     |
| 1462   | 7026    | 1802    |
| 444    | 1773    | 1691    |
| 1040   | 5054    | 3070    |
| 312    | 1040    | 781     |
| 309    | 1682    | 352     |
| 855    | 2659    | 688     |
| 922    | 2979    | 2836    |
| 643    | 2827    | 848     |
| 980    | 1020    | 620     |
| 1148   | 2750    | 3200    |
| 749    | 3356    | 5842    |
| 182    | 3138    | 3340    |
| 886    | 4162    | 1789    |
| 560    | 2440    | 1510    |
| 105    | 240     | 142     |
| 221    | 1699    | 477     |

|     |      |      |
|-----|------|------|
| 726 | 2940 | 869  |
| 619 | 1723 | 394  |
| 398 | 2245 | 2429 |
| 77  | 236  | 78   |
| 351 | 1293 | 281  |
| 365 | 2059 | 658  |
| 218 | 741  | 318  |
| 276 | 1306 | 704  |
| 270 | 1046 | 696  |
| 339 | 1367 | 166  |
| 26  | 166  | 41   |
| 228 | 599  | 439  |
| 150 | 880  | 636  |
| 571 | 1805 | 385  |
| 252 | 1212 | 597  |
| 199 | 1989 | 452  |
| 162 | 869  | 595  |
| 33  | 68   | 55   |
| 13  | 31   | 71   |
| 603 | 1234 | 1698 |
| 64  | 378  | 165  |
| 26  | 242  | 99   |
| 26  | 225  | 35   |
| 35  | 276  | 117  |
| 23  | 79   | 122  |
| 711 | 1830 | 741  |
| 277 | 775  | 970  |
| 55  | 138  | 36   |
| 78  | 414  | 161  |
| 53  | 178  | 112  |
| 225 | 1954 | 461  |
| 112 | 325  | 222  |
| 60  | 232  | 159  |
| 221 | 1633 | 645  |
| 154 | 896  | 170  |
| 74  | 206  | 165  |
| 94  | 817  | 462  |
| 171 | 446  | 894  |
| 77  | 755  | 28   |
| 48  | 135  | 71   |
| 36  | 527  | 221  |
| 181 | 947  | 601  |
| 12  | 51   | 38   |
| 155 | 525  | 132  |
| 126 | 996  | 210  |
| 62  | 370  | 176  |
| 5   | 7    | 27   |
| 70  | 487  | 203  |
| 28  | 147  | 38   |
| 15  | 67   | 18   |
| 65  | 204  | 90   |
| 183 | 592  | 339  |
| 62  | 295  | 313  |
| 34  | 205  | 143  |
| 16  | 38   | 15   |
| 2   | 213  | 83   |
| 71  | 133  | 83   |
| 140 | 427  | 137  |
| 52  | 88   | 27   |

|     |     |     |
|-----|-----|-----|
| 49  | 98  | 62  |
| 11  | 63  | 29  |
| 28  | 210 | 222 |
| 55  | 116 | 66  |
| 32  | 91  | 30  |
| 12  | 46  | 25  |
| 9   | 80  | 80  |
| 18  | 242 | 83  |
| 10  | 147 | 148 |
| 10  | 45  | 17  |
| 22  | 253 | 70  |
| 40  | 287 | 64  |
| 25  | 157 | 71  |
| 34  | 166 | 30  |
| 34  | 166 | 30  |
| 15  | 80  | 97  |
| 25  | 183 | 85  |
| 49  | 257 | 125 |
| 9   | 105 | 18  |
| 13  | 48  | 30  |
| 2   | 12  | 4   |
| 102 | 188 | 139 |
| 14  | 41  | 28  |
| 16  | 179 | 112 |
| 5   | 81  | 94  |
| 18  | 161 | 60  |
| 0   | 9   | 21  |
| 25  | 59  | 68  |
| 21  | 47  | 14  |
| 22  | 127 | 44  |
| 9   | 50  | 14  |
| 41  | 199 | 46  |
| 27  | 122 | 19  |
| 3   | 77  | 32  |
| 12  | 57  | 26  |
| 10  | 58  | 45  |
| 50  | 103 | 49  |
| 9   | 38  | 40  |
| 22  | 165 | 140 |
| 25  | 80  | 45  |
| 2   | 9   | 4   |
| 18  | 48  | 126 |
| 35  | 114 | 74  |
| 8   | 26  | 25  |
| 34  | 59  | 77  |
| 7   | 40  | 31  |
| 3   | 26  | 10  |
| 4   | 43  | 5   |
| 7   | 85  | 9   |
| 27  | 88  | 48  |
| 2   | 102 | 8   |
| 15  | 58  | 58  |
| 1   | 32  | 15  |
| 2   | 80  | 46  |
| 3   | 118 | 23  |
| 5   | 39  | 49  |
| 8   | 5   | 5   |
| 6   | 69  | 38  |
| 18  | 51  | 85  |

|    |     |     |
|----|-----|-----|
| 6  | 39  | 10  |
| 6  | 18  | 15  |
| 34 | 77  | 60  |
| 4  | 52  | 39  |
| 14 | 13  | 47  |
| 1  | 5   | 3   |
| 8  | 44  | 65  |
| 6  | 50  | 26  |
| 25 | 74  | 11  |
| 27 | 70  | 54  |
| 23 | 38  | 32  |
| 6  | 7   | 9   |
| 9  | 153 | 40  |
| 28 | 150 | 29  |
| 20 | 25  | 8   |
| 2  | 36  | 26  |
| 3  | 114 | 39  |
| 0  | 24  | 2   |
| 2  | 8   | 7   |
| 2  | 65  | 19  |
| 1  | 7   | 5   |
| 5  | 107 | 33  |
| 19 | 59  | 55  |
| 2  | 8   | 7   |
| 17 | 192 | 20  |
| 36 | 33  | 33  |
| 8  | 21  | 5   |
| 0  | 0   | 0   |
| 3  | 7   | 2   |
| 4  | 33  | 10  |
| 50 | 59  | 122 |
| 4  | 19  | 23  |
| 2  | 8   | 4   |
| 2  | 4   | 0   |
| 6  | 27  | 35  |
| 2  | 50  | 13  |
| 0  | 9   | 26  |
| 0  | 18  | 76  |
| 31 | 89  | 13  |
| 2  | 46  | 26  |
| 7  | 30  | 27  |
| 3  | 8   | 9   |
| 9  | 31  | 7   |
| 4  | 15  | 47  |
| 5  | 49  | 24  |
| 1  | 60  | 10  |
| 6  | 24  | 26  |
| 4  | 34  | 31  |
| 15 | 14  | 30  |
| 3  | 9   | 7   |
| 19 | 43  | 33  |
| 5  | 56  | 6   |
| 21 | 31  | 15  |
| 6  | 10  | 20  |
| 7  | 34  | 10  |
| 0  | 2   | 1   |
| 1  | 16  | 6   |
| 1  | 0   | 1   |
| 4  | 32  | 34  |

1  
4  
3  
12  
5  
33  
6  
2  
1  
13  
0  
2  
5  
0  
1  
0  
2  
4  
5  
4  
0  
2  
2  
1  
0  
1  
1  
4  
4  
3  
1  
1  
5  
4  
3  
2  
0  
5  
0  
4  
7  
0  
2  
1  
1  
9  
0  
3  
13  
3  
1  
1  
0  
2  
3  
0  
1  
1  
0

10  
26  
33  
46  
26  
24  
18  
14  
11  
20  
0  
34  
11  
13  
9  
6  
15  
10  
62  
12  
0  
0  
0  
29  
15  
3  
44  
16  
18  
30  
8  
15  
4  
2  
14  
12  
2  
22  
4  
9  
12  
2  
42  
24  
6  
27  
2  
26  
13  
8  
33  
6  
0  
6  
5  
4  
7  
8  
8

6  
7  
13  
25  
16  
27  
11  
3  
6  
17  
1  
12  
6  
6  
0  
1  
4  
20  
5  
8  
3  
5  
5  
39  
22  
7  
7  
0  
14  
7  
3  
2  
9  
7  
5  
2  
0  
6  
2  
10  
19  
2  
11  
3  
4  
11  
1  
1  
7  
11  
23  
8  
2  
0  
7  
3  
62  
5  
10  
4



|   |    |    |
|---|----|----|
| 0 | 18 | 10 |
| 3 | 8  | 10 |
| 4 | 18 | 7  |
| 7 | 12 | 9  |
| 4 | 21 | 12 |
| 3 | 23 | 16 |
| 3 | 5  | 3  |
| 4 | 41 | 7  |
| 0 | 2  | 0  |
| 1 | 3  | 0  |
| 0 | 1  | 2  |
| 1 | 11 | 9  |
| 3 | 8  | 0  |
| 0 | 33 | 9  |
| 3 | 22 | 5  |
| 2 | 2  | 1  |
| 1 | 8  | 11 |
| 1 | 11 | 0  |
| 1 | 11 | 5  |
| 2 | 12 | 2  |
| 5 | 20 | 13 |
| 2 | 14 | 3  |
| 0 | 9  | 5  |
| 1 | 12 | 13 |
| 3 | 11 | 2  |
| 1 | 6  | 9  |
| 5 | 15 | 2  |
| 2 | 21 | 4  |
| 4 | 9  | 3  |
| 1 | 9  | 4  |
| 0 | 5  | 7  |
| 0 | 0  | 0  |
| 0 | 1  | 0  |
| 0 | 5  | 6  |
| 3 | 3  | 3  |
| 1 | 10 | 8  |
| 0 | 21 | 9  |
| 1 | 4  | 8  |
| 1 | 9  | 2  |
| 2 | 9  | 5  |
| 3 | 1  | 0  |
| 3 | 11 | 3  |
| 2 | 8  | 2  |
| 3 | 5  | 11 |
| 3 | 4  | 3  |
| 0 | 12 | 7  |
| 3 | 3  | 6  |
| 4 | 4  | 1  |
| 2 | 13 | 11 |
| 1 | 11 | 7  |
| 1 | 20 | 6  |
| 0 | 1  | 0  |
| 5 | 8  | 2  |
| 0 | 1  | 1  |
| 1 | 3  | 4  |
| 0 | 3  | 4  |
| 3 | 17 | 6  |
| 0 | 0  | 0  |
| 1 | 18 | 5  |

|   |    |    |
|---|----|----|
| 2 | 16 | 3  |
| 6 | 15 | 5  |
| 0 | 1  | 1  |
| 2 | 6  | 7  |
| 4 | 4  | 7  |
| 0 | 8  | 2  |
| 2 | 5  | 5  |
| 0 | 1  | 2  |
| 0 | 3  | 2  |
| 1 | 7  | 4  |
| 2 | 10 | 1  |
| 2 | 3  | 4  |
| 0 | 1  | 4  |
| 0 | 0  | 0  |
| 3 | 17 | 5  |
| 1 | 1  | 2  |
| 1 | 2  | 3  |
| 0 | 3  | 1  |
| 0 | 0  | 0  |
| 0 | 4  | 2  |
| 0 | 4  | 0  |
| 0 | 5  | 1  |
| 1 | 4  | 2  |
| 2 | 5  | 7  |
| 2 | 6  | 3  |
| 7 | 8  | 0  |
| 0 | 1  | 0  |
| 1 | 1  | 0  |
| 0 | 6  | 6  |
| 1 | 2  | 1  |
| 0 | 2  | 1  |
| 2 | 10 | 4  |
| 0 | 1  | 0  |
| 0 | 12 | 4  |
| 0 | 1  | 0  |
| 3 | 16 | 3  |
| 1 | 4  | 1  |
| 1 | 1  | 7  |
| 5 | 10 | 11 |
| 0 | 2  | 3  |
| 2 | 5  | 6  |
| 0 | 4  | 0  |
| 0 | 8  | 0  |
| 1 | 9  | 0  |
| 0 | 3  | 1  |
| 0 | 1  | 4  |
| 0 | 2  | 2  |
| 1 | 5  | 1  |
| 0 | 0  | 0  |
| 0 | 0  | 1  |
| 1 | 10 | 4  |
| 0 | 5  | 0  |
| 0 | 0  | 0  |
| 0 | 1  | 2  |
| 2 | 0  | 0  |
| 0 | 2  | 0  |
| 1 | 3  | 3  |
| 0 | 6  | 1  |
| 0 | 1  | 0  |

0  
0  
2  
0  
0  
0  
0  
5  
1  
0  
0  
0  
0  
0  
1  
1  
2  
3  
0  
0  
0  
1  
0  
2  
0  
0  
0  
0  
0  
0  
2  
0  
0  
1  
2  
0  
0  
1  
0  
2  
3  
0  
2  
0  
1  
0  
0  
0  
1  
0  
0  
1  
0  
0  
1  
0  
1  
0  
0  
0  
0

0  
4  
0  
0  
2  
1  
3  
0  
4  
2  
2  
1  
0  
0  
5  
8  
5  
3  
0  
0  
3  
1  
2  
3  
4  
0  
2  
3  
0  
1  
0  
5  
6  
2  
1  
5  
1  
3  
1  
6  
1  
1  
4  
0  
3  
0  
0  
2  
0  
1  
1  
1  
0  
0  
5  
0

1  
3  
0  
0  
4  
0  
7  
0  
3  
2  
0  
0  
1  
1  
4  
3  
2  
0  
0  
1  
0  
1  
0  
1  
0  
0  
0  
1  
0  
1  
1  
6  
1  
1  
0  
2  
0  
1  
0  
0  
1  
2  
1  
2  
1  
0  
0  
6  
4  
1  
1  
0  
0  
0  
0  
1  
2  
0



|        |         |         |
|--------|---------|---------|
| 0      | 0       | 1       |
| 0      | 1       | 0       |
| 0      | 0       | 0       |
| 0      | 3       | 0       |
| 0      | 0       | 0       |
| 0      | 3       | 2       |
| 0      | 0       | 0       |
| 0      | 0       | 1       |
| 0      | 0       | 0       |
| 4      | 1       | 3       |
| 0      | 1       | 2       |
| 1      | 2       | 0       |
| 0      | 0       | 0       |
| B_32   | B_34    | C_1     |
| UC     | UC      | UC      |
| 436533 | 1053215 | 2026336 |
| 18     | 14      | 22      |
| -0.80  | -1.54   | 0.23    |

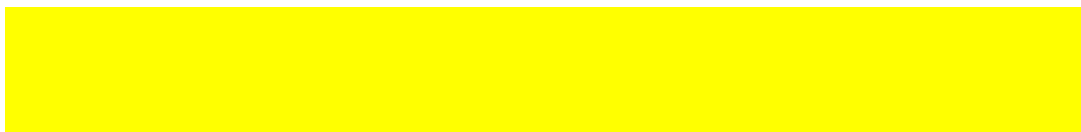

|         |        |         |
|---------|--------|---------|
| 0.27    | 0.25   | 0.68    |
| 20      | 21     | 9       |
| 1       | 1      | 1       |
| 7       | 8      | 9       |
| 7       | 8      | 9       |
| B_34    | C_1    | C_40    |
| UC      | UC     | UC      |
| 1363063 | 824884 | 2206918 |
| B_34    | C_1    | C_40    |
| 611778  | 445855 | 1151739 |
| 31223   | 37854  | 212328  |
| 105091  | 65314  | 34851   |
| 120189  | 45388  | 161620  |
| 131474  | 70868  | 71100   |
| 7446    | 5218   | 69561   |
| 33009   | 14027  | 46792   |
| 913     | 844    | 14990   |
| 8942    | 3676   | 40102   |
| 15831   | 8819   | 78886   |
| 33498   | 5755   | 22597   |
| 22347   | 14870  | 26861   |
| 25473   | 3000   | 12589   |
| 16799   | 14150  | 27534   |
| 3788    | 838    | 8708    |
| 35649   | 9765   | 12161   |
| 4464    | 802    | 3895    |
| 8136    | 2552   | 7622    |
| 2501    | 2161   | 10910   |

|       |      |       |
|-------|------|-------|
| 10410 | 3362 | 9844  |
| 8427  | 3475 | 6819  |
| 7142  | 2556 | 9468  |
| 4485  | 1504 | 3495  |
| 652   | 702  | 3102  |
| 614   | 255  | 6392  |
| 4063  | 2120 | 5309  |
| 8635  | 3018 | 5386  |
| 1193  | 462  | 9240  |
| 2888  | 721  | 7772  |
| 7026  | 1802 | 5010  |
| 1773  | 1691 | 4682  |
| 5054  | 3070 | 5236  |
| 1040  | 781  | 1221  |
| 1682  | 352  | 461   |
| 2659  | 688  | 7293  |
| 2979  | 2836 | 7956  |
| 2827  | 848  | 10796 |
| 1020  | 620  | 6151  |
| 2750  | 3200 | 6179  |
| 3356  | 5842 | 3316  |
| 3138  | 3340 | 2883  |
| 4162  | 1789 | 1123  |
| 2440  | 1510 | 3965  |
| 240   | 142  | 2630  |
| 1699  | 477  | 1702  |
| 2940  | 869  | 1577  |
| 1723  | 394  | 1318  |
| 2245  | 2429 | 1707  |
| 236   | 78   | 265   |
| 1293  | 281  | 586   |
| 2059  | 658  | 3027  |
| 741   | 318  | 1030  |
| 1306  | 704  | 1275  |
| 1046  | 696  | 1197  |
| 1367  | 166  | 691   |
| 166   | 41   | 74    |
| 599   | 439  | 1963  |
| 880   | 636  | 801   |
| 1805  | 385  | 708   |
| 1212  | 597  | 1406  |
| 1989  | 452  | 643   |
| 869   | 595  | 560   |
| 68    | 55   | 288   |
| 31    | 71   | 49    |
| 1234  | 1698 | 3665  |
| 378   | 165  | 755   |
| 242   | 99   | 166   |
| 225   | 35   | 208   |
| 276   | 117  | 235   |
| 79    | 122  | 3061  |
| 1830  | 741  | 819   |
| 775   | 970  | 1051  |
| 138   | 36   | 424   |
| 414   | 161  | 1357  |
| 178   | 112  | 173   |
| 1954  | 461  | 1019  |
| 325   | 222  | 1271  |
| 232   | 159  | 751   |

|      |     |      |
|------|-----|------|
| 1633 | 645 | 467  |
| 896  | 170 | 431  |
| 206  | 165 | 1370 |
| 817  | 462 | 459  |
| 446  | 894 | 2109 |
| 755  | 28  | 46   |
| 135  | 71  | 296  |
| 527  | 221 | 234  |
| 947  | 601 | 959  |
| 51   | 38  | 203  |
| 525  | 132 | 589  |
| 996  | 210 | 306  |
| 370  | 176 | 209  |
| 7    | 27  | 23   |
| 487  | 203 | 185  |
| 147  | 38  | 159  |
| 67   | 18  | 80   |
| 204  | 90  | 109  |
| 592  | 339 | 264  |
| 295  | 313 | 286  |
| 205  | 143 | 143  |
| 38   | 15  | 121  |
| 213  | 83  | 204  |
| 133  | 83  | 158  |
| 427  | 137 | 117  |
| 88   | 27  | 322  |
| 98   | 62  | 256  |
| 63   | 29  | 100  |
| 210  | 222 | 82   |
| 116  | 66  | 220  |
| 91   | 30  | 74   |
| 46   | 25  | 127  |
| 80   | 80  | 138  |
| 242  | 83  | 115  |
| 147  | 148 | 125  |
| 45   | 17  | 254  |
| 253  | 70  | 89   |
| 287  | 64  | 243  |
| 157  | 71  | 214  |
| 166  | 30  | 65   |
| 166  | 30  | 65   |
| 80   | 97  | 182  |
| 183  | 85  | 163  |
| 257  | 125 | 124  |
| 105  | 18  | 178  |
| 48   | 30  | 102  |
| 12   | 4   | 5    |
| 188  | 139 | 131  |
| 41   | 28  | 84   |
| 179  | 112 | 47   |
| 81   | 94  | 181  |
| 161  | 60  | 54   |
| 9    | 21  | 49   |
| 59   | 68  | 50   |
| 47   | 14  | 126  |
| 127  | 44  | 137  |
| 50   | 14  | 25   |
| 199  | 46  | 78   |
| 122  | 19  | 215  |

|     |     |     |
|-----|-----|-----|
| 77  | 32  | 81  |
| 57  | 26  | 60  |
| 58  | 45  | 70  |
| 103 | 49  | 118 |
| 38  | 40  | 222 |
| 165 | 140 | 73  |
| 80  | 45  | 31  |
| 9   | 4   | 14  |
| 48  | 126 | 206 |
| 114 | 74  | 46  |
| 26  | 25  | 85  |
| 59  | 77  | 170 |
| 40  | 31  | 50  |
| 26  | 10  | 21  |
| 43  | 5   | 76  |
| 85  | 9   | 52  |
| 88  | 48  | 52  |
| 102 | 8   | 1   |
| 58  | 58  | 140 |
| 32  | 15  | 435 |
| 80  | 46  | 48  |
| 118 | 23  | 43  |
| 39  | 49  | 68  |
| 5   | 5   | 4   |
| 69  | 38  | 35  |
| 51  | 85  | 94  |
| 39  | 10  | 15  |
| 18  | 15  | 18  |
| 77  | 60  | 100 |
| 52  | 39  | 34  |
| 13  | 47  | 24  |
| 5   | 3   | 7   |
| 44  | 65  | 92  |
| 50  | 26  | 15  |
| 74  | 11  | 35  |
| 70  | 54  | 49  |
| 38  | 32  | 48  |
| 7   | 9   | 12  |
| 153 | 40  | 40  |
| 150 | 29  | 38  |
| 25  | 8   | 30  |
| 36  | 26  | 83  |
| 114 | 39  | 38  |
| 24  | 2   | 79  |
| 8   | 7   | 25  |
| 65  | 19  | 30  |
| 7   | 5   | 54  |
| 107 | 33  | 24  |
| 59  | 55  | 55  |
| 8   | 7   | 22  |
| 192 | 20  | 46  |
| 33  | 33  | 14  |
| 21  | 5   | 30  |
| 0   | 0   | 0   |
| 7   | 2   | 47  |
| 33  | 10  | 24  |
| 59  | 122 | 35  |
| 19  | 23  | 96  |
| 8   | 4   | 17  |



|    |    |     |
|----|----|-----|
| 4  | 0  | 6   |
| 27 | 35 | 102 |
| 50 | 13 | 17  |
| 9  | 26 | 29  |
| 18 | 76 | 30  |
| 89 | 13 | 30  |
| 46 | 26 | 51  |
| 30 | 27 | 10  |
| 8  | 9  | 24  |
| 31 | 7  | 36  |
| 15 | 47 | 115 |
| 49 | 24 | 20  |
| 60 | 10 | 16  |
| 24 | 26 | 46  |
| 34 | 31 | 29  |
| 14 | 30 | 26  |
| 9  | 7  | 20  |
| 43 | 33 | 51  |
| 56 | 6  | 17  |
| 31 | 15 | 34  |
| 10 | 20 | 11  |
| 34 | 10 | 10  |
| 2  | 1  | 3   |
| 16 | 6  | 69  |
| 0  | 1  | 54  |
| 32 | 34 | 36  |
| 10 | 6  | 19  |
| 26 | 7  | 22  |
| 33 | 13 | 17  |
| 46 | 25 | 28  |
| 26 | 16 | 23  |
| 24 | 27 | 33  |
| 18 | 11 | 26  |
| 14 | 3  | 58  |
| 11 | 6  | 13  |
| 20 | 17 | 81  |
| 0  | 1  | 4   |
| 34 | 12 | 18  |
| 11 | 6  | 21  |
| 13 | 6  | 9   |
| 9  | 0  | 4   |
| 6  | 1  | 4   |
| 15 | 4  | 6   |
| 10 | 20 | 29  |
| 62 | 5  | 5   |
| 12 | 8  | 12  |
| 0  | 3  | 20  |
| 0  | 5  | 12  |
| 0  | 5  | 12  |
| 29 | 39 | 23  |
| 15 | 22 | 19  |
| 3  | 7  | 13  |
| 44 | 7  | 6   |
| 16 | 0  | 18  |
| 18 | 14 | 6   |
| 30 | 7  | 6   |
| 8  | 3  | 20  |
| 15 | 2  | 4   |
| 4  | 9  | 4   |

|    |    |     |
|----|----|-----|
| 2  | 7  | 3   |
| 14 | 5  | 11  |
| 12 | 2  | 46  |
| 2  | 0  | 1   |
| 22 | 6  | 10  |
| 4  | 2  | 12  |
| 9  | 10 | 15  |
| 12 | 19 | 26  |
| 2  | 2  | 11  |
| 42 | 11 | 7   |
| 24 | 3  | 6   |
| 6  | 4  | 10  |
| 27 | 11 | 13  |
| 2  | 1  | 1   |
| 26 | 7  | 4   |
| 13 | 11 | 27  |
| 8  | 23 | 17  |
| 33 | 8  | 14  |
| 6  | 2  | 15  |
| 0  | 0  | 0   |
| 6  | 7  | 8   |
| 5  | 3  | 14  |
| 4  | 62 | 274 |
| 7  | 5  | 12  |
| 8  | 10 | 25  |
| 8  | 4  | 28  |
| 18 | 10 | 13  |
| 8  | 10 | 12  |
| 18 | 7  | 15  |
| 12 | 9  | 11  |
| 21 | 12 | 16  |
| 23 | 16 | 9   |
| 5  | 3  | 14  |
| 41 | 7  | 16  |
| 2  | 0  | 7   |
| 3  | 0  | 2   |
| 1  | 2  | 10  |
| 11 | 9  | 12  |
| 8  | 0  | 4   |
| 33 | 9  | 0   |
| 22 | 5  | 6   |
| 2  | 1  | 16  |
| 8  | 11 | 40  |
| 11 | 0  | 3   |
| 11 | 5  | 3   |
| 12 | 2  | 5   |
| 20 | 13 | 6   |
| 14 | 3  | 4   |
| 9  | 5  | 3   |
| 12 | 13 | 10  |
| 11 | 2  | 6   |
| 6  | 9  | 6   |
| 15 | 2  | 3   |
| 21 | 4  | 5   |
| 9  | 3  | 7   |
| 9  | 4  | 7   |
| 5  | 7  | 18  |
| 0  | 0  | 5   |
| 1  | 0  | 1   |

5  
3  
10  
21  
4  
9  
9  
1  
11  
8  
5  
4  
12  
3  
4  
13  
11  
20  
1  
8  
1  
3  
3  
17  
0  
18  
16  
15  
1  
6  
4  
8  
5  
1  
3  
7  
10  
3  
1  
0  
17  
1  
2  
3  
0  
4  
4  
5  
4  
5  
6  
8  
1  
1  
6  
2  
2  
10  
1

6  
3  
8  
9  
8  
2  
5  
0  
3  
2  
11  
3  
7  
6  
1  
11  
7  
6  
0  
2  
1  
4  
4  
6  
0  
5  
3  
5  
1  
7  
7  
2  
5  
2  
2  
4  
1  
4  
4  
0  
5  
2  
3  
1  
0  
2  
0  
1  
2  
7  
3  
0  
0  
6  
1  
1  
4  
0

17  
15  
9  
2  
1  
1  
6  
5  
3  
10  
5  
14  
4  
13  
11  
5  
2  
4  
0  
8  
2  
7  
4  
6  
2  
3  
10  
3  
6  
3  
4  
9  
10  
2  
3  
4  
3  
3  
6  
0  
6  
4  
2  
7  
1  
15  
1  
3  
3  
9  
11  
0  
1  
1  
3  
4  
2  
3  
0

12  
1  
16  
4  
1  
10  
2  
5  
4  
8  
9  
3  
1  
2  
5  
0  
0  
10  
5  
0  
1  
0  
2  
3  
6  
1  
0  
4  
0  
0  
2  
1  
3  
0  
4  
2  
2  
1  
0  
0  
5  
8  
5  
3  
0  
0  
3  
1  
2  
3  
4  
0  
2  
3  
0  
1  
0  
5  
6

4  
0  
3  
1  
7  
11  
3  
6  
0  
0  
0  
1  
4  
2  
1  
0  
1  
4  
0  
0  
2  
0  
0  
3  
1  
0  
1  
3  
0  
0  
4  
0  
7  
0  
3  
2  
0  
0  
1  
1  
4  
3  
2  
0  
0  
1  
1  
0  
0  
1  
0  
1  
1  
1

4  
0  
6  
5  
5  
3  
2  
1  
1  
1  
3  
3  
0  
2  
4  
1  
4  
3  
3  
1  
1  
1  
8  
6  
3  
0  
6  
2  
3  
1  
1  
6  
2  
3  
6  
2  
1  
1  
0  
1  
1  
2  
8  
3  
0  
1  
2  
3  
2  
4  
0  
0  
1  
6  
3  
1  
2  
3

2  
1  
5  
1  
3  
1  
6  
1  
1  
4  
0  
3  
0  
0  
0  
2  
0  
2  
0  
1  
1  
1  
0  
0  
5  
0  
2  
3  
2  
0  
0  
4  
1  
3  
1  
2  
0  
1  
5  
0  
1  
0  
0  
0  
2  
0  
0  
0  
1  
3  
1  
2  
3  
0  
0  
0  
0  
0

6  
1  
0  
2  
0  
1  
0  
1  
2  
1  
2  
1  
0  
0  
6  
4  
1  
1  
0  
0  
0  
0  
1  
2  
0  
2  
2  
3  
2  
0  
1  
0  
2  
0  
5  
0  
7  
0  
0  
0  
0  
0  
0  
0  
4  
0  
1  
3  
0  
0  
1  
0  
3  
0

2  
0  
3  
4  
2  
3  
5  
0  
0  
3  
0  
4  
1  
2  
5  
0  
8  
5  
1  
1  
4  
0  
0  
5  
0  
2  
0  
3  
8  
1  
0  
1  
2  
1  
1  
0  
0  
1  
3  
1  
0  
0  
6  
2  
0  
0  
1  
0  
5  
0  
4  
4  
0  
3

|   |   |   |
|---|---|---|
| 2 | 1 | 0 |
| 2 | 1 | 1 |
| 2 | 0 | 0 |
| 0 | 0 | 2 |
| 0 | 0 | 0 |
| 2 | 0 | 1 |
| 2 | 1 | 1 |
| 0 | 0 | 0 |
| 2 | 2 | 1 |
| 3 | 0 | 0 |
| 4 | 1 | 1 |
| 3 | 4 | 2 |
| 0 | 0 | 8 |
| 0 | 4 | 3 |
| 0 | 4 | 5 |
| 1 | 1 | 0 |
| 2 | 1 | 2 |
| 2 | 2 | 1 |
| 1 | 0 | 1 |
| 0 | 0 | 0 |
| 0 | 0 | 0 |
| 2 | 1 | 1 |
| 0 | 0 | 3 |
| 1 | 0 | 1 |
| 1 | 3 | 0 |
| 0 | 0 | 0 |
| 0 | 1 | 1 |
| 1 | 0 | 0 |
| 0 | 0 | 0 |
| 3 | 0 | 0 |
| 0 | 0 | 0 |
| 3 | 2 | 0 |
| 0 | 0 | 2 |
| 0 | 1 | 6 |
| 0 | 0 | 1 |
| 1 | 3 | 3 |
| 1 | 2 | 1 |
| 2 | 0 | 2 |

|         |        |         |
|---------|--------|---------|
| 0.27    | 0.25   | 0.68    |
| 20      | 21     | 9       |
| 1       | 1      | 1       |
| 7       | 8      | 9       |
| 7       | 8      | 9       |
| B_34    | C_1    | C_40    |
| UC      | UC     | UC      |
| 1363063 | 824884 | 2206918 |
| UC      | UC     | UC      |
| 611778  | 445855 | 1151739 |
| 31223   | 37854  | 212328  |
| 105091  | 65314  | 34851   |
| 120189  | 45388  | 161620  |
| 131474  | 70868  | 71100   |

|       |       |       |
|-------|-------|-------|
| 7446  | 5218  | 69561 |
| 33009 | 14027 | 46792 |
| 913   | 844   | 14990 |
| 8942  | 3676  | 40102 |
| 15831 | 8819  | 78886 |
| 33498 | 5755  | 22597 |
| 22347 | 14870 | 26861 |
| 25473 | 3000  | 12589 |
| 16799 | 14150 | 27534 |
| 3788  | 838   | 8708  |
| 35649 | 9765  | 12161 |
| 4464  | 802   | 3895  |
| 8136  | 2552  | 7622  |
| 2501  | 2161  | 10910 |
| 10410 | 3362  | 9844  |
| 8427  | 3475  | 6819  |
| 7142  | 2556  | 9468  |
| 4485  | 1504  | 3495  |
| 652   | 702   | 3102  |
| 614   | 255   | 6392  |
| 4063  | 2120  | 5309  |
| 8635  | 3018  | 5386  |
| 1193  | 462   | 9240  |
| 2888  | 721   | 7772  |
| 7026  | 1802  | 5010  |
| 1773  | 1691  | 4682  |
| 5054  | 3070  | 5236  |
| 1040  | 781   | 1221  |
| 1682  | 352   | 461   |
| 2659  | 688   | 7293  |
| 2979  | 2836  | 7956  |
| 2827  | 848   | 10796 |
| 1020  | 620   | 6151  |
| 2750  | 3200  | 6179  |
| 3356  | 5842  | 3316  |
| 3138  | 3340  | 2883  |
| 4162  | 1789  | 1123  |
| 2440  | 1510  | 3965  |
| 240   | 142   | 2630  |
| 1699  | 477   | 1702  |
| 2940  | 869   | 1577  |
| 1723  | 394   | 1318  |
| 2245  | 2429  | 1707  |
| 236   | 78    | 265   |
| 1293  | 281   | 586   |
| 2059  | 658   | 3027  |
| 741   | 318   | 1030  |
| 1306  | 704   | 1275  |
| 1046  | 696   | 1197  |
| 1367  | 166   | 691   |
| 166   | 41    | 74    |
| 599   | 439   | 1963  |
| 880   | 636   | 801   |
| 1805  | 385   | 708   |
| 1212  | 597   | 1406  |
| 1989  | 452   | 643   |
| 869   | 595   | 560   |
| 68    | 55    | 288   |
| 31    | 71    | 49    |

|      |      |      |
|------|------|------|
| 1234 | 1698 | 3665 |
| 378  | 165  | 755  |
| 242  | 99   | 166  |
| 225  | 35   | 208  |
| 276  | 117  | 235  |
| 79   | 122  | 3061 |
| 1830 | 741  | 819  |
| 775  | 970  | 1051 |
| 138  | 36   | 424  |
| 414  | 161  | 1357 |
| 178  | 112  | 173  |
| 1954 | 461  | 1019 |
| 325  | 222  | 1271 |
| 232  | 159  | 751  |
| 1633 | 645  | 467  |
| 896  | 170  | 431  |
| 206  | 165  | 1370 |
| 817  | 462  | 459  |
| 446  | 894  | 2109 |
| 755  | 28   | 46   |
| 135  | 71   | 296  |
| 527  | 221  | 234  |
| 947  | 601  | 959  |
| 51   | 38   | 203  |
| 525  | 132  | 589  |
| 996  | 210  | 306  |
| 370  | 176  | 209  |
| 7    | 27   | 23   |
| 487  | 203  | 185  |
| 147  | 38   | 159  |
| 67   | 18   | 80   |
| 204  | 90   | 109  |
| 592  | 339  | 264  |
| 295  | 313  | 286  |
| 205  | 143  | 143  |
| 38   | 15   | 121  |
| 213  | 83   | 204  |
| 133  | 83   | 158  |
| 427  | 137  | 117  |
| 88   | 27   | 322  |
| 98   | 62   | 256  |
| 63   | 29   | 100  |
| 210  | 222  | 82   |
| 116  | 66   | 220  |
| 91   | 30   | 74   |
| 46   | 25   | 127  |
| 80   | 80   | 138  |
| 242  | 83   | 115  |
| 147  | 148  | 125  |
| 45   | 17   | 254  |
| 253  | 70   | 89   |
| 287  | 64   | 243  |
| 157  | 71   | 214  |
| 166  | 30   | 65   |
| 166  | 30   | 65   |
| 80   | 97   | 182  |
| 183  | 85   | 163  |
| 257  | 125  | 124  |
| 105  | 18   | 178  |



|     |     |     |
|-----|-----|-----|
| 48  | 30  | 102 |
| 12  | 4   | 5   |
| 188 | 139 | 131 |
| 41  | 28  | 84  |
| 179 | 112 | 47  |
| 81  | 94  | 181 |
| 161 | 60  | 54  |
| 9   | 21  | 49  |
| 59  | 68  | 50  |
| 47  | 14  | 126 |
| 127 | 44  | 137 |
| 50  | 14  | 25  |
| 199 | 46  | 78  |
| 122 | 19  | 215 |
| 77  | 32  | 81  |
| 57  | 26  | 60  |
| 58  | 45  | 70  |
| 103 | 49  | 118 |
| 38  | 40  | 222 |
| 165 | 140 | 73  |
| 80  | 45  | 31  |
| 9   | 4   | 14  |
| 48  | 126 | 206 |
| 114 | 74  | 46  |
| 26  | 25  | 85  |
| 59  | 77  | 170 |
| 40  | 31  | 50  |
| 26  | 10  | 21  |
| 43  | 5   | 76  |
| 85  | 9   | 52  |
| 88  | 48  | 52  |
| 102 | 8   | 1   |
| 58  | 58  | 140 |
| 32  | 15  | 435 |
| 80  | 46  | 48  |
| 118 | 23  | 43  |
| 39  | 49  | 68  |
| 5   | 5   | 4   |
| 69  | 38  | 35  |
| 51  | 85  | 94  |
| 39  | 10  | 15  |
| 18  | 15  | 18  |
| 77  | 60  | 100 |
| 52  | 39  | 34  |
| 13  | 47  | 24  |
| 5   | 3   | 7   |
| 44  | 65  | 92  |
| 50  | 26  | 15  |
| 74  | 11  | 35  |
| 70  | 54  | 49  |
| 38  | 32  | 48  |
| 7   | 9   | 12  |
| 153 | 40  | 40  |
| 150 | 29  | 38  |
| 25  | 8   | 30  |
| 36  | 26  | 83  |
| 114 | 39  | 38  |
| 24  | 2   | 79  |
| 8   | 7   | 25  |

|     |     |     |
|-----|-----|-----|
| 65  | 19  | 30  |
| 7   | 5   | 54  |
| 107 | 33  | 24  |
| 59  | 55  | 55  |
| 8   | 7   | 22  |
| 192 | 20  | 46  |
| 33  | 33  | 14  |
| 21  | 5   | 30  |
| 0   | 0   | 0   |
| 7   | 2   | 47  |
| 33  | 10  | 24  |
| 59  | 122 | 35  |
| 19  | 23  | 96  |
| 8   | 4   | 17  |
| 4   | 0   | 6   |
| 27  | 35  | 102 |
| 50  | 13  | 17  |
| 9   | 26  | 29  |
| 18  | 76  | 30  |
| 89  | 13  | 30  |
| 46  | 26  | 51  |
| 30  | 27  | 10  |
| 8   | 9   | 24  |
| 31  | 7   | 36  |
| 15  | 47  | 115 |
| 49  | 24  | 20  |
| 60  | 10  | 16  |
| 24  | 26  | 46  |
| 34  | 31  | 29  |
| 14  | 30  | 26  |
| 9   | 7   | 20  |
| 43  | 33  | 51  |
| 56  | 6   | 17  |
| 31  | 15  | 34  |
| 10  | 20  | 11  |
| 34  | 10  | 10  |
| 2   | 1   | 3   |
| 16  | 6   | 69  |
| 0   | 1   | 54  |
| 32  | 34  | 36  |
| 10  | 6   | 19  |
| 26  | 7   | 22  |
| 33  | 13  | 17  |
| 46  | 25  | 28  |
| 26  | 16  | 23  |
| 24  | 27  | 33  |
| 18  | 11  | 26  |
| 14  | 3   | 58  |
| 11  | 6   | 13  |
| 20  | 17  | 81  |
| 0   | 1   | 4   |
| 34  | 12  | 18  |
| 11  | 6   | 21  |
| 13  | 6   | 9   |
| 9   | 0   | 4   |
| 6   | 1   | 4   |
| 15  | 4   | 6   |
| 10  | 20  | 29  |
| 62  | 5   | 5   |

|    |    |     |
|----|----|-----|
| 12 | 8  | 12  |
| 0  | 3  | 20  |
| 0  | 5  | 12  |
| 0  | 5  | 12  |
| 29 | 39 | 23  |
| 15 | 22 | 19  |
| 3  | 7  | 13  |
| 44 | 7  | 6   |
| 16 | 0  | 18  |
| 18 | 14 | 6   |
| 30 | 7  | 6   |
| 8  | 3  | 20  |
| 15 | 2  | 4   |
| 4  | 9  | 4   |
| 2  | 7  | 3   |
| 14 | 5  | 11  |
| 12 | 2  | 46  |
| 2  | 0  | 1   |
| 22 | 6  | 10  |
| 4  | 2  | 12  |
| 9  | 10 | 15  |
| 12 | 19 | 26  |
| 2  | 2  | 11  |
| 42 | 11 | 7   |
| 24 | 3  | 6   |
| 6  | 4  | 10  |
| 27 | 11 | 13  |
| 2  | 1  | 1   |
| 26 | 7  | 4   |
| 13 | 11 | 27  |
| 8  | 23 | 17  |
| 33 | 8  | 14  |
| 6  | 2  | 15  |
| 0  | 0  | 0   |
| 6  | 7  | 8   |
| 5  | 3  | 14  |
| 4  | 62 | 274 |
| 7  | 5  | 12  |
| 8  | 10 | 25  |
| 8  | 4  | 28  |
| 18 | 10 | 13  |
| 8  | 10 | 12  |
| 18 | 7  | 15  |
| 12 | 9  | 11  |
| 21 | 12 | 16  |
| 23 | 16 | 9   |
| 5  | 3  | 14  |
| 41 | 7  | 16  |
| 2  | 0  | 7   |
| 3  | 0  | 2   |
| 1  | 2  | 10  |
| 11 | 9  | 12  |
| 8  | 0  | 4   |
| 33 | 9  | 0   |
| 22 | 5  | 6   |
| 2  | 1  | 16  |
| 8  | 11 | 40  |
| 11 | 0  | 3   |
| 11 | 5  | 3   |

|    |    |    |
|----|----|----|
| 12 | 2  | 5  |
| 20 | 13 | 6  |
| 14 | 3  | 4  |
| 9  | 5  | 3  |
| 12 | 13 | 10 |
| 11 | 2  | 6  |
| 6  | 9  | 6  |
| 15 | 2  | 3  |
| 21 | 4  | 5  |
| 9  | 3  | 7  |
| 9  | 4  | 7  |
| 5  | 7  | 18 |
| 0  | 0  | 5  |
| 1  | 0  | 1  |
| 5  | 6  | 17 |
| 3  | 3  | 15 |
| 10 | 8  | 9  |
| 21 | 9  | 2  |
| 4  | 8  | 1  |
| 9  | 2  | 1  |
| 9  | 5  | 6  |
| 1  | 0  | 5  |
| 11 | 3  | 3  |
| 8  | 2  | 10 |
| 5  | 11 | 5  |
| 4  | 3  | 14 |
| 12 | 7  | 4  |
| 3  | 6  | 13 |
| 4  | 1  | 11 |
| 13 | 11 | 5  |
| 11 | 7  | 2  |
| 20 | 6  | 4  |
| 1  | 0  | 0  |
| 8  | 2  | 8  |
| 1  | 1  | 2  |
| 3  | 4  | 7  |
| 3  | 4  | 4  |
| 17 | 6  | 6  |
| 0  | 0  | 2  |
| 18 | 5  | 3  |
| 16 | 3  | 10 |
| 15 | 5  | 3  |
| 1  | 1  | 6  |
| 6  | 7  | 3  |
| 4  | 7  | 4  |
| 8  | 2  | 9  |
| 5  | 5  | 10 |
| 1  | 2  | 2  |
| 3  | 2  | 3  |
| 7  | 4  | 4  |
| 10 | 1  | 3  |
| 3  | 4  | 3  |
| 1  | 4  | 6  |
| 0  | 0  | 0  |
| 17 | 5  | 6  |
| 1  | 2  | 4  |
| 2  | 3  | 2  |
| 3  | 1  | 7  |
| 0  | 0  | 1  |

4  
4  
5  
4  
5  
6  
8  
1  
1  
6  
2  
2  
10  
1  
12  
1  
16  
4  
1  
10  
2  
5  
4  
8  
9  
3  
1  
2  
5  
0  
0  
10  
5  
0  
1  
0  
2  
3  
6  
1  
0  
4  
0  
0  
2  
1  
3  
0  
4  
2  
2  
2  
1  
0  
0  
5  
8  
5  
3  
0

2  
0  
1  
2  
7  
3  
0  
0  
0  
6  
1  
1  
4  
0  
4  
0  
3  
1  
7  
11  
3  
6  
0  
0  
0  
1  
4  
0  
2  
0  
3  
1  
0  
1  
3  
0  
0  
4  
0  
7  
0  
3  
2  
0  
0  
1  
1  
4  
3  
2  
0

15  
1  
3  
3  
9  
11  
0  
1  
1  
3  
4  
2  
3  
0  
4  
0  
6  
5  
5  
3  
2  
1  
1  
1  
3  
3  
0  
2  
4  
1  
4  
3  
3  
1  
1  
1  
8  
6  
3  
0  
6  
2  
3  
1  
6  
2  
3  
6  
2  
1  
1  
0  
1  
1  
2  
8  
3  
0

0  
3  
1  
2  
3  
4  
0  
2  
3  
0  
1  
0  
5  
6  
2  
1  
5  
1  
3  
1  
6  
1  
1  
4  
0  
3  
0  
0  
0  
2  
0  
2  
0  
1  
1  
1  
0  
0  
5  
0  
2  
3  
2  
0  
0  
0  
4  
1  
3  
1  
2  
0  
1  
5  
0  
1  
0  
0  
0

0  
1  
0  
1  
0  
1  
0  
0  
0  
1  
0  
1  
6  
1  
0  
2  
0  
1  
0  
1  
2  
1  
2  
1  
0  
0  
6  
4  
1  
1  
0  
0  
0  
1  
2  
0  
2  
3  
2  
0  
1  
0  
2  
0  
5  
0  
7  
0  
0  
0  
0  
1  
0  
0  
0

1  
2  
0  
3  
2  
4  
0  
0  
1  
6  
3  
1  
2  
3  
2  
0  
3  
4  
2  
3  
5  
0  
0  
3  
0  
4  
1  
0  
2  
4  
5  
0  
8  
1  
1  
4  
0  
0  
5  
0  
2  
0  
3  
8  
1  
0  
1  
2  
1  
1  
0  
0  
1  
3  
1  
0  
0  
0

2  
0  
0  
0  
1  
3  
1  
2  
3  
0  
0  
0  
0  
0  
2  
2  
2  
0  
0  
2  
2  
0  
2  
2  
3  
4  
3  
0  
0  
0  
1  
2  
2  
1  
0  
0  
2  
0  
1  
1  
0  
0  
1  
0  
0  
3  
0  
3  
0  
0  
0  
1  
1  
1  
2

42470  
112911  
  
405  
UC  
UC

0  
0  
0  
4  
0  
1  
3  
0  
0  
1  
0  
3  
0  
1  
0  
0  
0  
1  
0  
2  
0  
1  
4  
0  
4  
4  
1  
1  
2  
0  
0  
0  
1  
0  
3  
0  
1  
0  
0  
2  
0  
1  
0  
3  
2  
0

25724  
81506  
  
435  
UC  
UC

6  
2  
0  
0  
1  
0  
1  
0  
5  
0  
4  
4  
0  
3  
0  
1  
0  
2  
0  
1  
1  
0  
1  
0  
1  
1  
2  
8  
3  
5  
0  
2  
1  
1  
0  
0  
1  
3  
1  
0  
0  
1  
0  
0  
0  
0  
2  
6  
1  
3  
1  
2

69556  
209845  
  
402  
UC  
UC

|         |        |         |
|---------|--------|---------|
| 7       | 8      | 9       |
| 7       | 8      | 9       |
| UC      | UC     | UC      |
| B_34    | C_1    | C_40    |
| 1363063 | 824884 | 2206918 |
| UC      | UC     | UC      |
| 14.41   | 17.33  | 16.56   |
| 0.74    | 1.47   | 3.05    |
| 2.47    | 2.54   | 0.50    |
| 2.83    | 1.76   | 2.32    |
| 3.10    | 2.75   | 1.02    |
| 0.18    | 0.20   | 1.00    |
| 0.78    | 0.55   | 0.67    |
| 0.02    | 0.03   | 0.22    |
| 0.21    | 0.14   | 0.58    |
| 0.37    | 0.34   | 1.13    |
| 0.79    | 0.22   | 0.32    |
| 0.53    | 0.58   | 0.39    |
| 0.60    | 0.12   | 0.18    |
| 0.40    | 0.55   | 0.40    |
| 0.09    | 0.03   | 0.13    |
| 0.84    | 0.38   | 0.17    |
| 0.11    | 0.03   | 0.06    |
| 0.19    | 0.10   | 0.11    |
| 0.06    | 0.08   | 0.16    |
| 0.25    | 0.13   | 0.14    |
| 0.20    | 0.14   | 0.10    |
| 0.17    | 0.10   | 0.14    |
| 0.11    | 0.06   | 0.05    |
| 0.02    | 0.03   | 0.04    |
| 0.01    | 0.01   | 0.09    |
| 0.10    | 0.08   | 0.08    |
| 0.20    | 0.12   | 0.08    |
| 0.03    | 0.02   | 0.13    |
| 0.07    | 0.03   | 0.11    |
| 0.17    | 0.07   | 0.07    |
| 0.04    | 0.07   | 0.07    |
| 0.12    | 0.12   | 0.08    |
| 0.02    | 0.03   | 0.02    |
| 0.04    | 0.01   | 0.01    |
| 0.06    | 0.03   | 0.10    |
| 0.07    | 0.11   | 0.11    |
| 0.07    | 0.03   | 0.16    |
| 0.02    | 0.02   | 0.09    |
| 0.06    | 0.12   | 0.09    |
| 0.08    | 0.23   | 0.05    |
| 0.07    | 0.13   | 0.04    |
| 0.10    | 0.07   | 0.02    |
| 0.06    | 0.06   | 0.06    |
| 0.01    | 0.01   | 0.04    |
| 0.04    | 0.02   | 0.02    |
| 0.07    | 0.03   | 0.02    |
| 0.04    | 0.02   | 0.02    |
| 0.05    | 0.09   | 0.02    |
| 0.01    | 0.00   | 0.00    |
| 0.03    | 0.01   | 0.01    |
| 0.05    | 0.03   | 0.04    |
| 0.02    | 0.01   | 0.01    |



|      |      |      |
|------|------|------|
| 0.03 | 0.03 | 0.02 |
| 0.02 | 0.03 | 0.02 |
| 0.03 | 0.01 | 0.01 |
| 0.00 | 0.00 | 0.00 |
| 0.01 | 0.02 | 0.03 |
| 0.02 | 0.02 | 0.01 |
| 0.04 | 0.01 | 0.01 |
| 0.03 | 0.02 | 0.02 |
| 0.05 | 0.02 | 0.01 |
| 0.02 | 0.02 | 0.01 |
| 0.00 | 0.00 | 0.00 |
| 0.00 | 0.00 | 0.00 |
| 0.03 | 0.07 | 0.05 |
| 0.01 | 0.01 | 0.01 |
| 0.01 | 0.00 | 0.00 |
| 0.01 | 0.00 | 0.00 |
| 0.01 | 0.00 | 0.00 |
| 0.00 | 0.00 | 0.04 |
| 0.04 | 0.03 | 0.01 |
| 0.02 | 0.04 | 0.02 |
| 0.00 | 0.00 | 0.01 |
| 0.01 | 0.01 | 0.02 |
| 0.00 | 0.00 | 0.00 |
| 0.05 | 0.02 | 0.01 |
| 0.01 | 0.01 | 0.02 |
| 0.01 | 0.01 | 0.01 |
| 0.04 | 0.03 | 0.01 |
| 0.02 | 0.01 | 0.01 |
| 0.00 | 0.01 | 0.02 |
| 0.02 | 0.02 | 0.01 |
| 0.01 | 0.03 | 0.03 |
| 0.02 | 0.00 | 0.00 |
| 0.00 | 0.00 | 0.00 |
| 0.01 | 0.01 | 0.00 |
| 0.02 | 0.02 | 0.01 |
| 0.00 | 0.00 | 0.00 |
| 0.01 | 0.01 | 0.01 |
| 0.02 | 0.01 | 0.00 |
| 0.01 | 0.01 | 0.00 |
| 0.00 | 0.00 | 0.00 |
| 0.01 | 0.01 | 0.00 |
| 0.00 | 0.00 | 0.00 |
| 0.00 | 0.00 | 0.00 |
| 0.00 | 0.00 | 0.00 |
| 0.01 | 0.01 | 0.00 |
| 0.01 | 0.01 | 0.00 |
| 0.00 | 0.01 | 0.00 |
| 0.00 | 0.00 | 0.00 |
| 0.00 | 0.00 | 0.00 |
| 0.01 | 0.00 | 0.00 |
| 0.00 | 0.00 | 0.00 |
| 0.00 | 0.00 | 0.00 |
| 0.00 | 0.00 | 0.00 |
| 0.00 | 0.01 | 0.00 |
| 0.00 | 0.00 | 0.00 |
| 0.00 | 0.00 | 0.00 |
| 0.00 | 0.00 | 0.00 |
| 0.00 | 0.00 | 0.00 |







|       |       |       |
|-------|-------|-------|
| -0.75 | -0.89 | -0.03 |
| -0.99 | -1.07 | 0.96  |
| 1.19  | -0.93 | -0.55 |
| 0.31  | 0.77  | -0.94 |
| 1.39  | -1.39 | -1.02 |
| -0.41 | 0.48  | -0.41 |
| -0.60 | -0.86 | -0.43 |
| 2.37  | 0.36  | -0.53 |
| -0.33 | -0.80 | -0.64 |
| -0.23 | -1.13 | -1.03 |
| -1.09 | -0.87 | -0.22 |
| 0.15  | -0.99 | -0.89 |
| 0.66  | -0.36 | -0.95 |
| 0.26  | -0.80 | -0.23 |
| -0.16 | -0.75 | -0.85 |
| -0.98 | -0.87 | -0.70 |
| -0.68 | -0.71 | -0.23 |
| -0.36 | -0.61 | -0.73 |
| 1.04  | -0.33 | -0.97 |
| -0.81 | -0.91 | 0.19  |
| -0.76 | -1.54 | 0.09  |
| 1.48  | -0.75 | -0.70 |
| -1.14 | -0.58 | -0.54 |
| -0.06 | -0.05 | -0.90 |
| -0.53 | -0.44 | -0.63 |
| -0.18 | -0.32 | -0.36 |
| -0.71 | -1.52 | 0.23  |
| -0.45 | -0.20 | -0.18 |
| -0.55 | -0.95 | 0.50  |
| -0.70 | -0.70 | -0.04 |
| -0.42 | 0.30  | -0.13 |
| -0.17 | 1.03  | -0.42 |
| -0.04 | 1.10  | -0.71 |
| 0.88  | 0.03  | -1.58 |
| -0.28 | -0.23 | -0.29 |
| -0.79 | -0.79 | 0.01  |
| -0.48 | -0.94 | -0.81 |
| 1.65  | -0.92 | -1.72 |
| -0.01 | -1.03 | -0.88 |
| 0.11  | 1.49  | -0.83 |
| -0.21 | -0.29 | -0.27 |
| 0.01  | -0.44 | -0.50 |
| 0.71  | -0.53 | 0.44  |
| -0.49 | -0.64 | -0.57 |
| -0.38 | -0.64 | -1.34 |
| -0.23 | -0.11 | -0.63 |
| 0.40  | -1.03 | -0.83 |

|       |       |       |
|-------|-------|-------|
| -0.22 | -0.32 | -0.34 |
| -1.13 | -0.89 | 0.01  |
| -0.27 | 0.06  | -1.04 |
| 0.89  | -1.16 | -1.52 |
| -0.33 | -0.47 | -0.55 |
| 1.79  | -0.56 | -1.23 |
| -0.13 | 0.09  | -1.16 |
| -0.60 | -0.56 | -0.40 |
| -0.26 | -0.17 | -0.26 |
| -0.02 | 2.11  | 1.34  |
| -0.73 | -0.97 | -0.55 |
| -0.47 | -0.61 | -0.71 |
| -0.51 | -0.90 | -0.74 |
| -0.71 | -0.94 | -1.07 |
| -0.40 | -0.37 | 0.14  |
| 1.52  | 0.51  | -0.69 |
| -0.21 | 1.71  | -0.52 |
| -0.64 | -0.81 | -0.37 |
| -0.54 | -1.00 | 0.74  |
| -0.85 | -0.83 | -1.06 |
| 2.38  | 0.06  | -0.21 |
| -0.83 | -0.71 | 0.46  |
| -0.42 | -0.40 | -0.28 |
| 1.91  | 0.69  | -1.00 |
| 0.59  | -0.77 | -0.80 |
| -1.21 | -0.90 | 1.71  |
| 0.99  | 0.81  | -0.82 |
| -0.56 | 1.68  | 1.27  |
| 0.32  | -0.46 | -0.48 |
| -0.80 | -0.87 | -0.62 |
| 0.64  | -0.03 | -0.96 |
| 1.82  | 2.04  | 0.12  |
| -0.81 | -0.77 | -0.53 |
| 1.06  | -0.86 | 0.03  |
| 1.44  | -0.46 | -0.92 |
| 0.20  | -0.28 | -1.27 |
| -0.28 | -0.12 | -0.25 |
| 1.28  | 0.33  | -1.06 |
| -0.46 | -0.87 | -0.70 |
| -0.40 | -0.57 | -0.48 |
| -0.24 | -0.50 | -0.88 |
| 1.44  | 1.26  | -0.98 |
| 0.01  | 2.00  | -1.08 |
| -0.60 | -0.43 | -1.26 |
| -0.61 | -0.68 | -0.41 |
| -0.14 | -0.46 | -0.51 |
| -0.75 | -0.71 | -1.10 |
| 0.53  | -0.48 | -1.25 |

|       |       |       |
|-------|-------|-------|
| -0.52 | -0.61 | -0.31 |
| -0.76 | -0.73 | -0.31 |
| -0.55 | -0.65 | -0.56 |
| -0.14 | 0.97  | -1.28 |
| -0.57 | -0.60 | -0.51 |
| -0.51 | -0.82 | -0.86 |
| -0.93 | -0.97 | -0.65 |
| -0.83 | -0.40 | -0.80 |
| 0.50  | -0.74 | -1.54 |
| -0.22 | 0.54  | -0.77 |
| -0.90 | -1.06 | 0.14  |
| 0.74  | -0.46 | -1.00 |
| 0.83  | -1.01 | -0.58 |
| 0.33  | -0.27 | -0.07 |
| 0.30  | -0.86 | -0.96 |
| 0.30  | -0.86 | -0.96 |
| -0.68 | -0.16 | -0.48 |
| 0.27  | -0.09 | -0.44 |
| 1.64  | 0.91  | -0.97 |
| -0.07 | -0.71 | -0.04 |
| -0.70 | -0.69 | -0.55 |
| -0.29 | -0.34 | -0.37 |
| 0.25  | 0.67  | -0.85 |
| -0.91 | -0.85 | -0.79 |
| 0.66  | 0.73  | -1.17 |
| -0.48 | 0.13  | -0.24 |
| 0.04  | -0.29 | -0.64 |
| -0.67 | -0.41 | -0.46 |
| -0.64 | 0.34  | -1.16 |
| -0.75 | -1.14 | -0.25 |
| 0.07  | -0.43 | -0.33 |
| -0.19 | -0.55 | -0.66 |
| 2.09  | -0.45 | -1.03 |

---

|                        |                         |                        |
|------------------------|-------------------------|------------------------|
| 4                      | 5                       | 6                      |
| 5                      | 6                       | 7                      |
| TGAGGTAGTAGGTTGTATAGTT | AACATTCAACGCTGTCGGTGAGT | TAGCAGCACGTAAATATTGGCG |
| let-7a-5p              | miR-181a-5p             | miR-16-5p              |
| 8839402                | 8658137                 | 7939871                |
| -0.72                  | -0.18                   | -0.85                  |
| -0.61                  | -1.73                   | 0.11                   |
| 0.67                   | -0.76                   | 0.75                   |
| -0.13                  | -1.23                   | -0.57                  |
| 2.76                   | -0.08                   | 0.55                   |
| 0.91                   | -0.44                   | -0.54                  |
| 0.38                   | 1.03                    | -0.92                  |
| -0.68                  | 0.65                    | -0.89                  |
| -0.12                  | -1.26                   | -0.17                  |
| -0.53                  | -1.64                   | -0.12                  |
| -0.86                  | -1.00                   | 0.38                   |
| -0.32                  | 0.27                    | -0.95                  |
| -0.44                  | -0.24                   | 1.63                   |
| -0.21                  | 0.88                    | -0.87                  |
| -0.39                  | -0.49                   | 0.62                   |
| -0.71                  | -0.42                   | 1.34                   |
| 0.37                   | 1.77                    | -0.72                  |
| -1.16                  | 0.05                    | 1.14                   |
| -1.28                  | 0.11                    | 0.06                   |
| -1.12                  | -0.29                   | 2.80                   |

|       |       |       |
|-------|-------|-------|
| -0.29 | 0.23  | -0.30 |
| 0.24  | 1.38  | -0.93 |
| 0.49  | 1.21  | -0.82 |
| 0.22  | 1.19  | -0.86 |
| 2.92  | 0.34  | -0.78 |
| 0.43  | 1.77  | -0.64 |
| 0.19  | -1.13 | 1.56  |
| -0.39 | -1.79 | 4.09  |
| -1.01 | -1.47 | -0.21 |
| -1.33 | -1.71 | -0.58 |
| -0.29 | -1.76 | -0.90 |
| -0.71 | -1.76 | -0.12 |
| 2.11  | -1.26 | 3.49  |
| -0.67 | 1.07  | -0.74 |
| -0.96 | 0.40  | -0.43 |
| -0.39 | 0.31  | -0.85 |
| -1.16 | -1.01 | -0.96 |
| -1.01 | 0.48  | -0.44 |
| -1.38 | 0.26  | 0.39  |
| -0.65 | 2.00  | -0.69 |
| -1.87 | 2.23  | -0.96 |
| -2.05 | 4.38  | -1.02 |
| -0.61 | 0.78  | -0.63 |
| -1.31 | -0.78 | 0.37  |
| -1.60 | 0.14  | -0.64 |
| -2.14 | 3.61  | -0.92 |
| -0.89 | -0.03 | 1.12  |
| -0.25 | 1.96  | -0.62 |
| -1.33 | 0.15  | 0.55  |
| -1.09 | 0.70  | -0.29 |
| -1.29 | 1.01  | 0.81  |
| -0.01 | -0.55 | -0.82 |
| 0.61  | -1.08 | -0.62 |
| 0.11  | -0.49 | -0.18 |
| 0.00  | -0.24 | -0.64 |
| -0.02 | -0.11 | -0.54 |
| -0.27 | -0.83 | 0.09  |
| -0.71 | -0.57 | 3.42  |
| 0.23  | 2.54  | -0.75 |
| 1.34  | 1.40  | 0.22  |
| 1.35  | 1.09  | 0.54  |
| -0.76 | -0.97 | 4.07  |
| 0.26  | 0.62  | -0.74 |
| 0.75  | -0.19 | -0.45 |
| 0.97  | -0.36 | 0.97  |
| 0.04  | 1.09  | -0.75 |
| -1.79 | -1.78 | 2.41  |
| -0.94 | -1.67 | -0.58 |
| 4.47  | 0.55  | -0.30 |
| 0.92  | 0.95  | 0.13  |
| -0.46 | -0.87 | -0.73 |
| -1.79 | -1.31 | 4.40  |
| -0.10 | -0.99 | 0.63  |
| -0.47 | -0.06 | 0.70  |
| -1.94 | 2.07  | -1.07 |
| -0.35 | -0.32 | 0.52  |
| -1.02 | -0.77 | 0.00  |
| -0.40 | -0.82 | 0.10  |
| 0.12  | -1.07 | 1.38  |



|       |       |       |
|-------|-------|-------|
| -0.62 | -0.75 | 2.46  |
| -0.23 | -0.23 | -0.25 |
| 0.00  | -0.18 | 0.36  |
| -1.32 | 0.81  | -0.78 |
| -1.33 | 0.29  | 2.10  |
| -0.83 | -1.15 | 4.85  |
| -1.58 | 0.16  | -0.11 |
| -0.69 | 0.27  | 0.04  |
| -0.53 | -0.10 | -0.08 |
| -0.86 | -0.51 | 1.10  |
| -0.65 | -0.44 | -0.14 |
| 1.62  | -0.33 | 0.45  |
| -0.66 | -0.42 | -0.81 |
| 0.91  | 1.73  | -0.78 |
| 0.57  | -0.45 | -0.12 |
| -0.84 | 0.16  | 0.08  |

|      |      |      |
|------|------|------|
| 0    | -1   | -1   |
| 0.00 | 0.00 | 0.00 |
| 1.00 | 1.00 | 1.00 |
| 0.61 | 0.14 | 0.26 |

| 4                                              | 5                                                 | 6                                              |
|------------------------------------------------|---------------------------------------------------|------------------------------------------------|
| TGAGGTAGTAGGTTGTATAGTT<br>let-7a-5p<br>8839402 | AACATTCAACGCTGTCGGTGAGT<br>miR-181a-5p<br>8658137 | TAGCAGCACGTAAATATTGGCG<br>miR-16-5p<br>7939871 |
| -0.72                                          | -0.18                                             | -0.85                                          |
| -0.61                                          | -1.73                                             | 0.11                                           |
| 0.67                                           | -0.76                                             | 0.75                                           |
| -0.13                                          | -1.23                                             | -0.57                                          |
| 2.76                                           | -0.08                                             | 0.55                                           |
| 0.91                                           | -0.44                                             | -0.54                                          |
| 0.38                                           | 1.03                                              | -0.92                                          |
| -0.68                                          | 0.65                                              | -0.89                                          |
| -0.12                                          | -1.26                                             | -0.17                                          |
| -0.53                                          | -1.64                                             | -0.12                                          |
| -0.86                                          | -1.00                                             | 0.38                                           |
| -0.32                                          | 0.27                                              | -0.95                                          |
| -0.44                                          | -0.24                                             | 1.63                                           |
| -0.21                                          | 0.88                                              | -0.87                                          |
| -0.39                                          | -0.49                                             | 0.62                                           |
| -0.71                                          | -0.42                                             | 1.34                                           |
| 0.37                                           | 1.77                                              | -0.72                                          |
| -1.16                                          | 0.05                                              | 1.14                                           |
| -1.28                                          | 0.11                                              | 0.06                                           |
| -1.12                                          | -0.29                                             | 2.80                                           |
| -0.29                                          | 0.23                                              | -0.30                                          |
| 0.24                                           | 1.38                                              | -0.93                                          |
| 0.49                                           | 1.21                                              | -0.82                                          |
| 0.22                                           | 1.19                                              | -0.86                                          |
| 2.92                                           | 0.34                                              | -0.78                                          |
| 0.43                                           | 1.77                                              | -0.64                                          |
| 0.19                                           | -1.13                                             | 1.56                                           |
| -0.39                                          | -1.79                                             | 4.09                                           |

|       |       |       |
|-------|-------|-------|
| -1.01 | -1.47 | -0.21 |
| -1.33 | -1.71 | -0.58 |
| -0.29 | -1.76 | -0.90 |
| -0.71 | -1.76 | -0.12 |
| 2.11  | -1.26 | 3.49  |
| -0.67 | 1.07  | -0.74 |
| -0.96 | 0.40  | -0.43 |
| -0.39 | 0.31  | -0.85 |
| -1.16 | -1.01 | 0.86  |

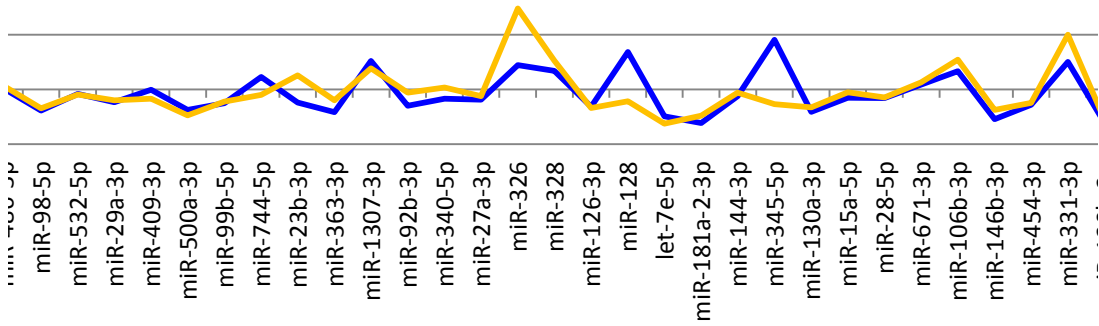

|       |       |       |
|-------|-------|-------|
| -0.00 | -0.24 | -0.04 |
| -0.02 | -0.11 | -0.54 |
| -0.27 | -0.83 | 0.09  |
| -0.71 | -0.57 | 3.42  |
| 0.23  | 2.54  | -0.75 |
| 1.34  | 1.40  | 0.22  |
| 1.35  | 1.09  | 0.54  |
| -0.76 | -0.97 | 4.07  |
| 0.26  | 0.62  | -0.74 |
| 0.75  | -0.19 | -0.45 |
| 0.97  | -0.36 | 0.97  |
| 0.04  | 1.09  | -0.75 |
| -1.79 | -1.78 | 2.41  |
| -0.94 | -1.67 | -0.58 |
| 4.47  | 0.55  | -0.30 |
| 0.92  | 0.95  | 0.13  |
| -0.46 | -0.87 | -0.73 |
| -1.79 | -1.31 | 4.40  |
| -0.10 | -0.99 | 0.63  |
| -0.47 | -0.06 | 0.70  |
| -1.94 | 2.07  | -1.07 |
| -0.35 | -0.32 | 0.52  |
| -1.02 | -0.77 | 0.00  |
| -0.40 | -0.82 | 0.10  |
| 0.12  | -1.07 | 1.38  |
| -0.62 | -0.75 | 2.46  |
| -0.23 | -0.23 | -0.25 |
| 0.00  | -0.18 | 0.36  |
| -1.32 | 0.81  | -0.78 |
| -1.33 | 0.29  | 2.10  |
| -0.83 | -1.15 | 4.85  |
| -1.58 | 0.16  | -0.11 |
| -0.69 | 0.27  | 0.04  |

|       |       |       |
|-------|-------|-------|
| -0.53 | -0.10 | -0.08 |
| -0.86 | -0.51 | 1.10  |
| -0.65 | -0.44 | -0.14 |
| 1.62  | -0.33 | 0.45  |
| -0.66 | -0.42 | -0.81 |
| 0.91  | 1.73  | -0.78 |
| 0.57  | -0.45 | -0.12 |
| -1    | 0     | 0     |

---

| 4                       | 5                      | 6                      |
|-------------------------|------------------------|------------------------|
| 33                      | 96                     | 125                    |
| TGTA AACATCCTTGACTGGAAG | AAGGAGCTCACAGTCTATTGAG | TGTAGTGTTCCTACTTTATGGA |
| miR-30e-5p              | miR-28-5p              | miR-142-3p             |
| 457362                  | 28163                  | 13338                  |
| -0.35                   | -0.76                  | -0.37                  |
| -0.61                   | 0.69                   | -0.39                  |
| 0.21                    | -0.20                  | -0.34                  |
| -0.18                   | -0.78                  | -0.35                  |
| 0.02                    | 1.80                   | -0.22                  |
| -0.48                   | -0.03                  | -0.33                  |
| -0.53                   | -0.24                  | -0.29                  |
| -0.44                   | -0.50                  | -0.34                  |
| -0.63                   | -0.88                  | -0.37                  |
| -0.58                   | -0.73                  | -0.34                  |
| -0.16                   | 0.54                   | -0.33                  |
| -0.51                   | -0.10                  | -0.32                  |
| 3.39                    | 3.20                   | 1.68                   |
| -0.59                   | -0.81                  | -0.37                  |
| -0.35                   | -0.33                  | -0.23                  |
| 0.86                    | 1.85                   | 0.41                   |
| -0.47                   | -0.46                  | -0.30                  |
| -0.16                   | 0.08                   | -0.30                  |
| -0.14                   | -0.02                  | -0.27                  |
| 2.91                    | 1.51                   | 4.54                   |
| -0.48                   | -0.39                  | -0.27                  |
| -0.47                   | -0.67                  | -0.35                  |
| -0.34                   | -0.41                  | -0.27                  |
| -0.55                   | -0.58                  | -0.30                  |
| -0.47                   | -0.60                  | -0.39                  |
| 0.04                    | -0.69                  | 0.04                   |
| 1.07                    | -0.48                  | 0.34                   |
| 4.26                    | 0.93                   | 4.34                   |
| 0.41                    | 0.38                   | -0.23                  |
| -0.49                   | -0.84                  | -0.36                  |
| -0.70                   | -1.13                  | -0.39                  |
| 0.03                    | -0.49                  | -0.39                  |
| 0.25                    | 1.90                   | -0.39                  |
| -0.33                   | -0.32                  | -0.24                  |
| -0.35                   | -0.30                  | -0.27                  |
| -0.21                   | -0.26                  | -0.05                  |
| -0.80                   | -1.08                  | -0.24                  |

---

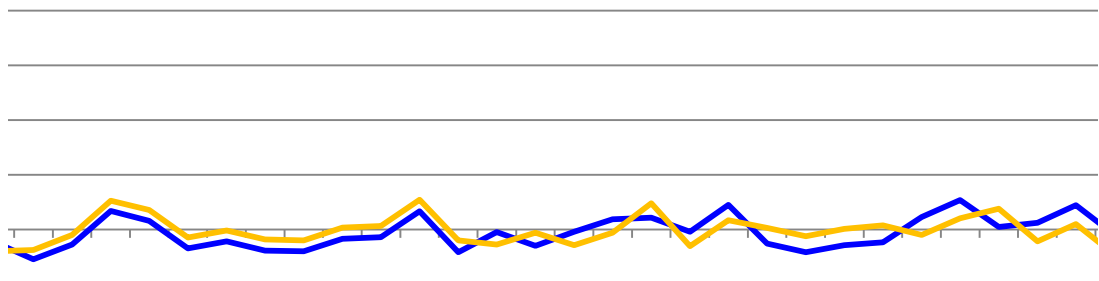

miR-146b-3p  
miR-191-5p  
miR-328  
miR-26b-3p  
miR-192-5p  
miR-339-3p  
miR-127-3p  
miR-185-5p  
miR-340-5p  
miR-106b-5p  
miR-106b-3p  
miR-363-3p  
miR-423-5p  
miR-92b-3p  
miR-4732-3p  
miR-361-3p  
miR-769-5p  
miR-410  
miR-193a-5p  
miR-361-5p  
miR-151a-3p  
miR-182-5p  
miR-451a  
miR-744-5p  
miR-181a-5p  
miR-93-5p  
miR-148a-3p  
miR-143-3p

|       |       |       |
|-------|-------|-------|
| -0.54 | -0.79 | -0.29 |
| -0.28 | -0.38 | -0.25 |
| 4.64  | 0.51  | 11.42 |
| -0.43 | -0.41 | -0.30 |
| 0.64  | 1.07  | -0.15 |
| 0.46  | 1.65  | -0.19 |
| 4.03  | -0.05 | 5.97  |
| -0.32 | -0.97 | -0.23 |
| -0.12 | -0.79 | -0.18 |
| 0.33  | -0.65 | -0.24 |
| -0.36 | -0.01 | -0.37 |
| 1.24  | -0.33 | -0.34 |
| -0.73 | -0.22 | -0.39 |
| 0.15  | -0.28 | -0.36 |
| 1.06  | 1.22  | -0.33 |
| -0.17 | -0.66 | -0.28 |
| 0.95  | 2.93  | -0.25 |
| -0.06 | -0.10 | -0.27 |
| 0.52  | 1.72  | -0.07 |
| -0.66 | -1.15 | -0.12 |
| 0.34  | 1.15  | 0.01  |
| -0.36 | -0.02 | -0.29 |
| -0.56 | -0.44 | -0.21 |
| 1.50  | -0.28 | -0.04 |
| 0.73  | 1.02  | -0.20 |
| -0.21 | -0.77 | -0.34 |
| 0.18  | 0.01  | -0.17 |
| -0.11 | 0.45  | -0.18 |
| 4.21  | 1.57  | 6.52  |
| 5.16  | 0.43  | 6.10  |
| 0.05  | 0.03  | -0.18 |
| 0.48  | 0.46  | -0.22 |
| 0.02  | -0.61 | -0.22 |
| 0.22  | 0.55  | -0.16 |
| -0.03 | 0.06  | -0.20 |
| 0.89  | 0.04  | -0.25 |
| -0.47 | -0.86 | -0.31 |
| -0.02 | -0.48 | -0.14 |
| -0.08 | -0.68 | -0.35 |
| 0.29  | -0.69 | -0.39 |
| 0.02  | 0.02  | 0.03  |
| 0.03  | 0.03  | 0.05  |

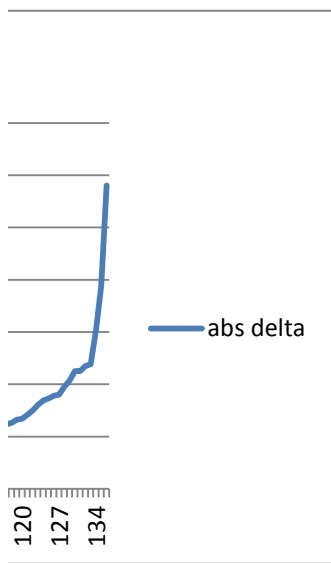











































































































































































|          |         |         |         |         |
|----------|---------|---------|---------|---------|
| 2206918  | 623719  | 774447  | 627333  | 2772220 |
| 10       | 11      | 12      | 13      | 14      |
| 10       | 11      | 12      | 13      | 14      |
| C_40     | C_41    | C_42    | C_44    | C_46    |
| UC       | UC      | UC      | UC      | UC      |
| 17200243 | 4588607 | 2634187 | 1410256 | 4408275 |
| 0.33     | 0.80    | 0.73    | 0.63    | 0.00    |
| C_40     | C_41    | C_42    | C_44    | C_46    |
| 14993325 | 3964888 | 1859740 | 782923  | 1636055 |
| 1151739  | 307256  | 262633  | 268518  | 548517  |
| 212328   | 50961   | 99661   | 9784    | 105685  |
| 34851    | 23541   | 38127   | 118333  | 125439  |
| 161620   | 37177   | 36863   | 41106   | 160662  |
| 71100    | 13196   | 29489   | 46656   | 156161  |
| 69561    | 20511   | 37797   | 2814    | 240682  |
| 46792    | 15577   | 43820   | 10515   | 172526  |
| 14990    | 6321    | 11878   | 883     | 137354  |
| 40102    | 8078    | 14047   | 4576    | 115851  |
| 78886    | 24650   | 18138   | 6193    | 64098   |
| 22597    | 9511    | 4895    | 10035   | 78871   |
| 26861    | 6339    | 10423   | 8175    | 39735   |
| 12589    | 5866    | 4634    | 6493    | 63899   |
| 27534    | 8294    | 5452    | 8195    | 25208   |
| 8708     | 5090    | 6269    | 4575    | 85702   |
| 12161    | 2335    | 4024    | 12753   | 17484   |
| 3895     | 1885    | 3731    | 944     | 56571   |
| 7622     | 2909    | 3032    | 2809    | 26495   |
| 10910    | 4625    | 7899    | 1763    | 37455   |
| 9844     | 4139    | 7982    | 2881    | 16454   |
| 6819     | 2331    | 2456    | 2873    | 23217   |
| 9468     | 3267    | 2123    | 1631    | 17176   |
| 3495     | 1170    | 2961    | 1222    | 26852   |
| 3102     | 1093    | 6547    | 325     | 15993   |
| 6392     | 5178    | 18805   | 686     | 14069   |
| 5309     | 1605    | 2430    | 1312    | 7665    |
| 5386     | 1741    | 1043    | 2842    | 5637    |
| 9240     | 4320    | 6596    | 368     | 8157    |
| 7772     | 1947    | 4366    | 1066    | 9427    |
| 5010     | 1359    | 3053    | 969     | 8717    |
| 4682     | 1287    | 2430    | 1563    | 15733   |
| 5236     | 1265    | 1977    | 3252    | 8322    |
| 1221     | 407     | 1145    | 497     | 22869   |
| 461      | 488     | 949     | 271     | 76995   |
| 7293     | 1770    | 4041    | 984     | 8871    |
| 7956     | 4187    | 1714    | 501     | 7546    |
| 10796    | 4263    | 8385    | 988     | 10993   |
| 6151     | 2995    | 10557   | 525     | 7827    |
| 6179     | 922     | 3605    | 576     | 4504    |
| 3316     | 381     | 1106    | 12046   | 2705    |
| 2883     | 1036    | 1343    | 674     | 6053    |
| 1123     | 485     | 887     | 2679    | 5165    |
| 3965     | 1230    | 1605    | 699     | 3430    |
| 2630     | 1565    | 2000    | 165     | 9282    |
| 1702     | 2131    | 2015    | 854     | 4660    |

|      |      |      |      |       |
|------|------|------|------|-------|
| 1577 | 462  | 933  | 953  | 4707  |
| 1318 | 396  | 1629 | 293  | 5009  |
| 1707 | 243  | 428  | 2696 | 2910  |
| 265  | 65   | 64   | 72   | 1555  |
| 586  | 230  | 1196 | 310  | 14430 |
| 3027 | 568  | 614  | 125  | 228   |
| 1030 | 408  | 1128 | 225  | 9671  |
| 1275 | 735  | 459  | 153  | 2961  |
| 1197 | 267  | 1249 | 566  | 4930  |
| 691  | 196  | 653  | 348  | 3067  |
| 74   | 72   | 101  | 26   | 2354  |
| 1963 | 497  | 739  | 181  | 3173  |
| 801  | 122  | 572  | 478  | 4670  |
| 708  | 429  | 591  | 688  | 2787  |
| 1406 | 239  | 1147 | 1042 | 1855  |
| 643  | 345  | 488  | 250  | 5044  |
| 560  | 321  | 566  | 449  | 4143  |
| 288  | 224  | 600  | 31   | 2776  |
| 49   | 31   | 68   | 7    | 701   |
| 3665 | 580  | 292  | 1137 | 702   |
| 755  | 417  | 405  | 60   | 2624  |
| 166  | 358  | 249  | 111  | 5181  |
| 208  | 157  | 183  | 40   | 2302  |
| 235  | 232  | 291  | 84   | 3407  |
| 3061 | 1256 | 1359 | 44   | 427   |
| 819  | 252  | 390  | 308  | 1576  |
| 1051 | 261  | 244  | 538  | 677   |
| 424  | 150  | 281  | 79   | 3887  |
| 1357 | 443  | 342  | 141  | 1607  |
| 173  | 74   | 286  | 78   | 1464  |
| 1019 | 169  | 192  | 160  | 223   |
| 1271 | 276  | 501  | 150  | 880   |
| 751  | 336  | 930  | 110  | 390   |
| 467  | 86   | 160  | 758  | 1084  |
| 431  | 323  | 606  | 63   | 2441  |
| 1370 | 186  | 345  | 86   | 997   |
| 459  | 113  | 227  | 306  | 1046  |
| 2109 | 299  | 494  | 297  | 523   |
| 46   | 138  | 25   | 28   | 7527  |
| 296  | 97   | 310  | 35   | 1681  |
| 234  | 55   | 122  | 107  | 1084  |
| 959  | 144  | 270  | 328  | 511   |
| 203  | 83   | 229  | 34   | 1643  |
| 589  | 166  | 260  | 128  | 1415  |
| 306  | 68   | 299  | 368  | 535   |
| 209  | 120  | 140  | 206  | 512   |
| 23   | 13   | 3    | 1    | 193   |
| 185  | 41   | 80   | 229  | 656   |
| 159  | 49   | 122  | 39   | 755   |
| 80   | 58   | 81   | 20   | 1978  |
| 109  | 45   | 203  | 106  | 1775  |
| 264  | 59   | 115  | 194  | 465   |
| 286  | 79   | 81   | 129  | 472   |
| 143  | 50   | 179  | 106  | 244   |
| 121  | 124  | 109  | 11   | 1562  |
| 204  | 98   | 57   | 8    | 434   |
| 158  | 39   | 115  | 28   | 635   |
| 117  | 85   | 117  | 418  | 461   |
| 322  | 155  | 603  | 55   | 357   |

|     |     |     |     |      |
|-----|-----|-----|-----|------|
| 256 | 142 | 120 | 18  | 958  |
| 100 | 32  | 64  | 23  | 1094 |
| 82  | 55  | 85  | 78  | 609  |
| 220 | 101 | 177 | 28  | 587  |
| 74  | 82  | 52  | 15  | 1263 |
| 127 | 118 | 75  | 11  | 682  |
| 138 | 36  | 159 | 67  | 774  |
| 115 | 39  | 80  | 90  | 247  |
| 125 | 26  | 46  | 28  | 695  |
| 254 | 76  | 127 | 6   | 328  |
| 89  | 33  | 110 | 110 | 275  |
| 243 | 49  | 53  | 146 | 339  |
| 214 | 19  | 82  | 52  | 390  |
| 65  | 23  | 75  | 26  | 685  |
| 65  | 23  | 75  | 26  | 685  |
| 182 | 87  | 119 | 30  | 356  |
| 163 | 76  | 38  | 32  | 336  |
| 124 | 74  | 56  | 90  | 518  |
| 178 | 15  | 57  | 6   | 56   |
| 102 | 17  | 69  | 35  | 621  |
| 5   | 3   | 4   | 4   | 457  |
| 131 | 54  | 35  | 103 | 443  |
| 84  | 62  | 110 | 23  | 101  |
| 47  | 12  | 16  | 53  | 434  |
| 181 | 38  | 85  | 7   | 136  |
| 54  | 9   | 19  | 69  | 133  |
| 49  | 37  | 0   | 5   | 37   |
| 50  | 10  | 23  | 64  | 411  |
| 126 | 20  | 139 | 13  | 280  |
| 137 | 69  | 29  | 8   | 345  |
| 25  | 8   | 16  | 8   | 648  |
| 78  | 46  | 70  | 31  | 285  |
| 215 | 84  | 43  | 41  | 215  |
| 81  | 17  | 24  | 21  | 209  |
| 60  | 7   | 27  | 19  | 261  |
| 70  | 24  | 31  | 26  | 245  |
| 118 | 33  | 88  | 35  | 121  |
| 222 | 76  | 40  | 17  | 258  |
| 73  | 11  | 30  | 321 | 180  |
| 31  | 6   | 32  | 24  | 206  |
| 14  | 23  | 14  | 1   | 302  |
| 206 | 46  | 16  | 34  | 112  |
| 46  | 4   | 21  | 50  | 182  |
| 85  | 13  | 33  | 9   | 234  |
| 170 | 27  | 29  | 42  | 136  |
| 50  | 22  | 12  | 3   | 65   |
| 21  | 17  | 32  | 23  | 249  |
| 76  | 30  | 28  | 7   | 185  |
| 52  | 8   | 15  | 10  | 63   |
| 52  | 2   | 18  | 36  | 158  |
| 1   | 1   | 2   | 112 | 327  |
| 140 | 49  | 12  | 11  | 45   |
| 435 | 48  | 57  | 6   | 90   |
| 48  | 28  | 34  | 7   | 164  |
| 43  | 18  | 21  | 13  | 138  |
| 68  | 14  | 23  | 20  | 74   |
| 4   | 4   | 0   | 1   | 118  |
| 35  | 15  | 20  | 24  | 188  |
| 94  | 12  | 22  | 24  | 79   |

|     |    |     |     |     |
|-----|----|-----|-----|-----|
| 15  | 17 | 21  | 7   | 493 |
| 18  | 1  | 20  | 5   | 357 |
| 100 | 18 | 21  | 106 | 67  |
| 34  | 20 | 28  | 9   | 81  |
| 24  | 71 | 26  | 20  | 469 |
| 7   | 2  | 9   | 1   | 155 |
| 92  | 35 | 20  | 23  | 103 |
| 15  | 3  | 1   | 17  | 256 |
| 35  | 16 | 21  | 12  | 182 |
| 49  | 23 | 31  | 37  | 99  |
| 48  | 13 | 27  | 16  | 202 |
| 12  | 5  | 25  | 9   | 402 |
| 40  | 8  | 15  | 21  | 36  |
| 38  | 18 | 5   | 5   | 26  |
| 30  | 13 | 29  | 9   | 155 |
| 83  | 21 | 20  | 7   | 220 |
| 38  | 7  | 12  | 12  | 20  |
| 79  | 26 | 27  | 18  | 119 |
| 25  | 5  | 23  | 3   | 292 |
| 30  | 7  | 5   | 2   | 5   |
| 54  | 18 | 42  | 7   | 161 |
| 24  | 16 | 14  | 19  | 53  |
| 55  | 13 | 23  | 52  | 80  |
| 22  | 5  | 22  | 3   | 275 |
| 46  | 6  | 12  | 8   | 16  |
| 14  | 14 | 15  | 15  | 166 |
| 30  | 17 | 49  | 7   | 169 |
| 0   | 1  | 0   | 11  | 0   |
| 47  | 23 | 43  | 4   | 417 |
| 24  | 11 | 37  | 10  | 136 |
| 35  | 8  | 12  | 60  | 27  |
| 96  | 41 | 37  | 11  | 60  |
| 17  | 19 | 21  | 8   | 48  |
| 6   | 1  | 12  | 5   | 108 |
| 102 | 15 | 12  | 17  | 73  |
| 17  | 19 | 10  | 6   | 208 |
| 29  | 4  | 2   | 13  | 62  |
| 30  | 0  | 17  | 37  | 19  |
| 30  | 13 | 29  | 6   | 34  |
| 51  | 3  | 6   | 22  | 61  |
| 10  | 9  | 6   | 11  | 59  |
| 24  | 18 | 6   | 1   | 156 |
| 36  | 4  | 5   | 3   | 2   |
| 115 | 9  | 22  | 11  | 59  |
| 20  | 0  | 10  | 13  | 79  |
| 16  | 3  | 9   | 17  | 117 |
| 46  | 14 | 8   | 30  | 57  |
| 29  | 10 | 10  | 2   | 23  |
| 26  | 0  | 10  | 16  | 75  |
| 20  | 3  | 20  | 0   | 44  |
| 51  | 11 | 2   | 14  | 43  |
| 17  | 4  | 17  | 4   | 109 |
| 34  | 5  | 24  | 12  | 69  |
| 11  | 3  | 13  | 12  | 94  |
| 10  | 7  | 22  | 5   | 103 |
| 3   | 0  | 2   | 0   | 14  |
| 69  | 6  | 22  | 3   | 52  |
| 54  | 71 | 113 | 1   | 38  |
| 36  | 8  | 9   | 6   | 46  |

|     |    |    |    |     |
|-----|----|----|----|-----|
| 19  | 7  | 13 | 3  | 76  |
| 22  | 15 | 6  | 8  | 78  |
| 17  | 4  | 3  | 1  | 3   |
| 28  | 6  | 14 | 18 | 25  |
| 23  | 3  | 2  | 22 | 29  |
| 33  | 7  | 7  | 9  | 25  |
| 26  | 10 | 9  | 4  | 43  |
| 58  | 13 | 16 | 3  | 56  |
| 13  | 7  | 20 | 2  | 115 |
| 81  | 10 | 9  | 1  | 27  |
| 4   | 1  | 11 | 0  | 75  |
| 18  | 6  | 6  | 9  | 64  |
| 21  | 4  | 7  | 5  | 51  |
| 9   | 4  | 4  | 7  | 20  |
| 4   | 5  | 6  | 3  | 39  |
| 4   | 4  | 4  | 1  | 125 |
| 6   | 1  | 11 | 3  | 123 |
| 29  | 6  | 9  | 6  | 31  |
| 5   | 4  | 2  | 4  | 10  |
| 12  | 3  | 11 | 7  | 86  |
| 20  | 12 | 31 | 1  | 87  |
| 12  | 5  | 9  | 3  | 26  |
| 12  | 5  | 9  | 3  | 26  |
| 23  | 1  | 3  | 4  | 1   |
| 19  | 13 | 3  | 2  | 26  |
| 13  | 8  | 5  | 2  | 13  |
| 6   | 3  | 2  | 5  | 7   |
| 18  | 7  | 10 | 9  | 47  |
| 6   | 2  | 3  | 6  | 49  |
| 6   | 8  | 3  | 4  | 54  |
| 20  | 12 | 6  | 7  | 30  |
| 4   | 2  | 6  | 7  | 14  |
| 4   | 4  | 9  | 6  | 107 |
| 3   | 4  | 23 | 2  | 10  |
| 11  | 7  | 7  | 8  | 25  |
| 46  | 9  | 7  | 2  | 43  |
| 1   | 2  | 0  | 0  | 30  |
| 10  | 8  | 5  | 5  | 40  |
| 12  | 1  | 9  | 3  | 169 |
| 15  | 0  | 12 | 16 | 15  |
| 26  | 3  | 2  | 5  | 7   |
| 11  | 1  | 9  | 3  | 165 |
| 7   | 0  | 8  | 5  | 22  |
| 6   | 1  | 3  | 3  | 4   |
| 10  | 4  | 1  | 3  | 80  |
| 13  | 5  | 2  | 9  | 27  |
| 1   | 1  | 0  | 0  | 8   |
| 4   | 0  | 5  | 18 | 17  |
| 27  | 5  | 7  | 4  | 7   |
| 17  | 2  | 4  | 3  | 18  |
| 14  | 2  | 3  | 4  | 8   |
| 15  | 1  | 7  | 1  | 19  |
| 0   | 6  | 1  | 0  | 29  |
| 8   | 3  | 3  | 0  | 15  |
| 14  | 3  | 4  | 2  | 71  |
| 274 | 7  | 14 | 4  | 43  |
| 12  | 4  | 3  | 12 | 15  |
| 25  | 0  | 2  | 6  | 69  |
| 28  | 7  | 13 | 1  | 18  |

|    |   |    |    |    |
|----|---|----|----|----|
| 13 | 1 | 2  | 1  | 2  |
| 12 | 2 | 6  | 6  | 30 |
| 15 | 2 | 3  | 0  | 5  |
| 11 | 2 | 6  | 6  | 22 |
| 16 | 3 | 5  | 3  | 18 |
| 9  | 1 | 8  | 2  | 18 |
| 14 | 3 | 4  | 2  | 65 |
| 16 | 3 | 0  | 7  | 7  |
| 7  | 3 | 0  | 0  | 28 |
| 2  | 1 | 5  | 0  | 60 |
| 10 | 4 | 17 | 0  | 21 |
| 12 | 3 | 2  | 2  | 8  |
| 4  | 3 | 3  | 0  | 59 |
| 0  | 0 | 0  | 31 | 39 |
| 6  | 2 | 4  | 3  | 4  |
| 16 | 8 | 11 | 4  | 62 |
| 40 | 9 | 7  | 2  | 14 |
| 3  | 3 | 2  | 2  | 48 |
| 3  | 0 | 1  | 3  | 35 |
| 5  | 1 | 0  | 0  | 6  |
| 6  | 1 | 3  | 8  | 3  |
| 4  | 0 | 8  | 5  | 14 |
| 3  | 0 | 2  | 4  | 14 |
| 10 | 7 | 2  | 11 | 3  |
| 6  | 1 | 9  | 5  | 33 |
| 6  | 0 | 3  | 6  | 27 |
| 3  | 1 | 2  | 2  | 24 |
| 5  | 2 | 2  | 7  | 17 |
| 7  | 1 | 1  | 1  | 14 |
| 7  | 0 | 5  | 3  | 27 |
| 18 | 7 | 10 | 5  | 13 |
| 5  | 2 | 7  | 2  | 45 |
| 1  | 0 | 6  | 0  | 54 |
| 17 | 8 | 2  | 4  | 17 |
| 15 | 6 | 11 | 1  | 25 |
| 9  | 5 | 2  | 2  | 18 |
| 2  | 2 | 3  | 4  | 9  |
| 1  | 2 | 0  | 3  | 17 |
| 1  | 0 | 1  | 3  | 17 |
| 6  | 1 | 5  | 3  | 17 |
| 5  | 4 | 11 | 0  | 57 |
| 3  | 2 | 1  | 5  | 25 |
| 10 | 2 | 1  | 0  | 2  |
| 5  | 2 | 4  | 0  | 17 |
| 14 | 2 | 4  | 1  | 2  |
| 4  | 5 | 3  | 1  | 35 |
| 13 | 2 | 2  | 2  | 11 |
| 11 | 6 | 2  | 0  | 15 |
| 5  | 8 | 3  | 0  | 8  |
| 2  | 0 | 1  | 2  | 9  |
| 4  | 2 | 2  | 1  | 7  |
| 0  | 0 | 0  | 0  | 31 |
| 8  | 4 | 1  | 1  | 17 |
| 2  | 1 | 5  | 0  | 16 |
| 7  | 5 | 4  | 1  | 10 |
| 4  | 3 | 4  | 4  | 25 |
| 6  | 0 | 1  | 9  | 6  |
| 2  | 1 | 2  | 0  | 1  |
| 3  | 1 | 1  | 2  | 13 |

|    |   |    |    |    |
|----|---|----|----|----|
| 10 | 4 | 2  | 7  | 14 |
| 3  | 2 | 2  | 6  | 21 |
| 6  | 2 | 0  | 1  | 10 |
| 3  | 2 | 4  | 4  | 22 |
| 4  | 1 | 4  | 12 | 6  |
| 9  | 2 | 4  | 5  | 13 |
| 10 | 2 | 3  | 2  | 10 |
| 2  | 0 | 0  | 0  | 1  |
| 3  | 2 | 3  | 1  | 23 |
| 4  | 1 | 3  | 2  | 17 |
| 3  | 2 | 2  | 1  | 14 |
| 3  | 1 | 0  | 2  | 18 |
| 6  | 0 | 12 | 1  | 8  |
| 0  | 0 | 1  | 0  | 73 |
| 6  | 0 | 6  | 2  | 8  |
| 4  | 8 | 1  | 2  | 28 |
| 2  | 0 | 1  | 0  | 23 |
| 7  | 1 | 0  | 0  | 14 |
| 1  | 1 | 0  | 0  | 28 |
| 15 | 3 | 6  | 1  | 16 |
| 1  | 2 | 0  | 3  | 26 |
| 3  | 1 | 1  | 2  | 27 |
| 3  | 3 | 4  | 0  | 7  |
| 9  | 3 | 2  | 0  | 10 |
| 11 | 2 | 0  | 3  | 1  |
| 0  | 0 | 3  | 0  | 1  |
| 1  | 0 | 0  | 0  | 27 |
| 1  | 0 | 1  | 1  | 58 |
| 3  | 0 | 2  | 0  | 6  |
| 4  | 1 | 2  | 2  | 10 |
| 2  | 0 | 3  | 0  | 1  |
| 3  | 2 | 0  | 2  | 9  |
| 0  | 1 | 1  | 1  | 11 |
| 4  | 1 | 2  | 6  | 3  |
| 0  | 0 | 1  | 1  | 15 |
| 6  | 1 | 1  | 0  | 0  |
| 5  | 1 | 1  | 1  | 9  |
| 5  | 0 | 1  | 1  | 2  |
| 3  | 1 | 1  | 2  | 8  |
| 2  | 0 | 1  | 3  | 6  |
| 1  | 1 | 2  | 10 | 10 |
| 1  | 1 | 3  | 1  | 9  |
| 1  | 0 | 2  | 0  | 3  |
| 3  | 1 | 1  | 0  | 5  |
| 3  | 2 | 4  | 4  | 3  |
| 0  | 0 | 2  | 1  | 13 |
| 2  | 0 | 0  | 1  | 12 |
| 4  | 0 | 0  | 4  | 8  |
| 1  | 1 | 4  | 0  | 17 |
| 4  | 0 | 0  | 0  | 20 |
| 3  | 0 | 1  | 1  | 4  |
| 3  | 1 | 0  | 0  | 0  |
| 1  | 1 | 0  | 0  | 20 |
| 1  | 3 | 0  | 1  | 2  |
| 1  | 0 | 2  | 1  | 6  |
| 8  | 3 | 4  | 0  | 8  |
| 6  | 0 | 0  | 3  | 8  |
| 3  | 1 | 5  | 0  | 4  |
| 0  | 1 | 0  | 0  | 1  |

|   |   |   |   |    |
|---|---|---|---|----|
| 6 | 0 | 1 | 2 | 8  |
| 2 | 1 | 3 | 3 | 7  |
| 3 | 0 | 4 | 0 | 5  |
| 1 | 0 | 1 | 1 | 12 |
| 1 | 1 | 1 | 1 | 6  |
| 6 | 1 | 2 | 0 | 2  |
| 2 | 2 | 1 | 2 | 7  |
| 3 | 0 | 0 | 1 | 21 |
| 6 | 1 | 0 | 1 | 3  |
| 2 | 0 | 3 | 2 | 0  |
| 1 | 0 | 2 | 0 | 23 |
| 1 | 0 | 0 | 0 | 9  |
| 0 | 0 | 1 | 0 | 1  |
| 1 | 0 | 0 | 2 | 16 |
| 1 | 1 | 0 | 2 | 5  |
| 2 | 0 | 1 | 2 | 6  |
| 8 | 2 | 2 | 1 | 1  |
| 3 | 1 | 0 | 4 | 2  |
| 0 | 0 | 0 | 0 | 10 |
| 1 | 1 | 0 | 0 | 0  |
| 2 | 1 | 0 | 1 | 3  |
| 0 | 0 | 3 | 1 | 26 |
| 3 | 0 | 1 | 1 | 2  |
| 2 | 0 | 3 | 5 | 2  |
| 4 | 1 | 0 | 1 | 3  |
| 0 | 1 | 5 | 0 | 18 |
| 0 | 0 | 0 | 2 | 8  |
| 1 | 1 | 2 | 0 | 13 |
| 6 | 2 | 1 | 0 | 5  |
| 3 | 1 | 2 | 1 | 10 |
| 1 | 0 | 0 | 0 | 14 |
| 2 | 0 | 1 | 2 | 4  |
| 3 | 1 | 1 | 1 | 8  |
| 2 | 1 | 0 | 8 | 2  |
| 0 | 1 | 1 | 0 | 18 |
| 3 | 0 | 0 | 0 | 7  |
| 4 | 0 | 1 | 2 | 1  |
| 2 | 1 | 2 | 3 | 3  |
| 3 | 0 | 1 | 1 | 8  |
| 5 | 0 | 1 | 0 | 0  |
| 0 | 0 | 0 | 0 | 1  |
| 0 | 0 | 0 | 0 | 5  |
| 3 | 0 | 3 | 4 | 2  |
| 0 | 0 | 2 | 0 | 5  |
| 4 | 0 | 0 | 1 | 6  |
| 1 | 0 | 1 | 0 | 2  |
| 0 | 0 | 1 | 0 | 24 |
| 2 | 1 | 3 | 0 | 3  |
| 4 | 1 | 1 | 2 | 3  |
| 5 | 1 | 1 | 0 | 3  |
| 0 | 0 | 1 | 1 | 6  |
| 5 | 1 | 3 | 0 | 9  |
| 8 | 0 | 0 | 1 | 2  |
| 1 | 0 | 2 | 0 | 13 |
| 1 | 0 | 0 | 0 | 6  |
| 4 | 0 | 3 | 0 | 4  |
| 0 | 0 | 1 | 0 | 6  |
| 0 | 1 | 0 | 1 | 0  |
| 5 | 1 | 1 | 0 | 9  |



|   |   |   |   |    |
|---|---|---|---|----|
| 0 | 0 | 0 | 1 | 5  |
| 2 | 0 | 0 | 2 | 5  |
| 0 | 0 | 1 | 5 | 2  |
| 3 | 0 | 3 | 1 | 2  |
| 8 | 0 | 2 | 0 | 3  |
| 1 | 0 | 5 | 0 | 15 |
| 0 | 0 | 2 | 1 | 1  |
| 1 | 0 | 0 | 1 | 13 |
| 2 | 0 | 0 | 0 | 4  |
| 1 | 0 | 0 | 0 | 5  |
| 1 | 0 | 0 | 0 | 0  |
| 0 | 1 | 2 | 2 | 3  |
| 0 | 0 | 0 | 0 | 14 |
| 1 | 0 | 0 | 0 | 0  |
| 3 | 0 | 1 | 0 | 3  |
| 1 | 2 | 0 | 0 | 3  |
| 0 | 0 | 1 | 0 | 4  |
| 0 | 0 | 0 | 0 | 1  |
| 0 | 0 | 1 | 0 | 14 |
| 6 | 1 | 0 | 0 | 0  |
| 2 | 2 | 0 | 0 | 7  |
| 0 | 0 | 1 | 0 | 7  |
| 0 | 0 | 1 | 0 | 13 |
| 1 | 1 | 5 | 1 | 3  |
| 0 | 2 | 0 | 2 | 2  |
| 1 | 1 | 0 | 0 | 6  |
| 0 | 0 | 0 | 0 | 4  |
| 5 | 0 | 0 | 0 | 0  |
| 0 | 0 | 0 | 1 | 8  |
| 4 | 1 | 0 | 0 | 3  |
| 4 | 0 | 0 | 0 | 0  |
| 0 | 0 | 1 | 0 | 2  |
| 3 | 2 | 1 | 0 | 0  |
| 0 | 0 | 0 | 1 | 5  |
| 1 | 0 | 0 | 0 | 2  |
| 0 | 0 | 1 | 0 | 4  |
| 2 | 0 | 1 | 1 | 1  |
| 0 | 0 | 0 | 0 | 8  |
| 1 | 0 | 1 | 0 | 6  |
| 1 | 1 | 1 | 0 | 4  |
| 0 | 0 | 0 | 0 | 4  |
| 1 | 0 | 0 | 0 | 3  |
| 0 | 0 | 3 | 1 | 2  |
| 1 | 0 | 0 | 1 | 3  |
| 2 | 0 | 0 | 0 | 1  |
| 8 | 2 | 1 | 0 | 3  |
| 3 | 0 | 2 | 0 | 1  |
| 5 | 2 | 0 | 0 | 0  |
| 0 | 1 | 0 | 0 | 2  |
| 2 | 0 | 1 | 1 | 1  |
| 1 | 0 | 0 | 0 | 4  |
| 1 | 0 | 0 | 0 | 0  |
| 0 | 0 | 1 | 1 | 4  |
| 0 | 0 | 0 | 0 | 2  |
| 1 | 1 | 0 | 2 | 1  |
| 3 | 0 | 0 | 0 | 2  |
| 1 | 0 | 0 | 0 | 2  |
| 0 | 1 | 1 | 3 | 3  |
| 0 | 0 | 0 | 0 | 4  |

|          |         |         |        |         |
|----------|---------|---------|--------|---------|
| 1        | 0       | 1       | 0      | 8       |
| 0        | 1       | 0       | 2      | 3       |
| 0        | 1       | 0       | 2      | 1       |
| 0        | 0       | 1       | 0      | 2       |
| 0        | 0       | 0       | 2      | 1       |
| 0        | 0       | 0       | 0      | 5       |
| 2        | 0       | 0       | 2      | 1       |
| 6        | 0       | 3       | 0      | 1       |
| 1        | 0       | 1       | 1      | 0       |
| 3        | 0       | 0       | 0      | 0       |
| 1        | 0       | 0       | 0      | 0       |
| 2        | 2       | 0       | 0      | 0       |
| 0        | 0       | 0       | 0      | 0       |
| C_40     | C_41    | C_42    | C_44   | C_46    |
| UC       | UC      | UC      | UC     | UC      |
| 14993325 | 3964888 | 1859740 | 782923 | 1636055 |
| 27       | 27      | 23      | 18     | 13      |
| 1.23     | 1.19    | 0.24    | -0.75  | -1.85   |

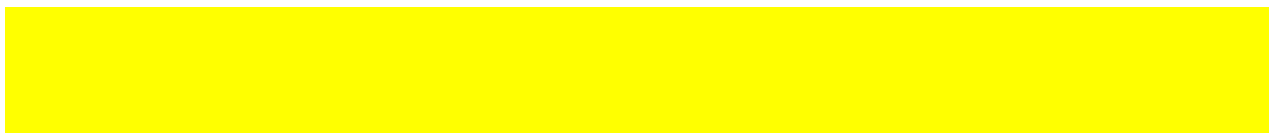

|        |        |        |         |         |
|--------|--------|--------|---------|---------|
| 0.89   | 0.99   | 0.03   | 0.53    | 0.99    |
| 4      | 1      | 27     | 18      | 2       |
| 1      | 1      | 1      | 1       | 1       |
| 10     | 11     | 12     | 13      | 14      |
| 10     | 11     | 12     | 13      | 14      |
| C_41   | C_42   | C_44   | C_46    | C_47    |
| UC     | UC     | UC     | UC      | UC      |
| 623719 | 774447 | 627333 | 2772220 | 1217409 |
| C_41   | C_42   | C_44   | C_46    | C_47    |
| 307256 | 262633 | 268518 | 548517  | 620936  |
| 50961  | 99661  | 9784   | 105685  | 53388   |
| 23541  | 38127  | 118333 | 125439  | 104165  |
| 37177  | 36863  | 41106  | 160662  | 85023   |
| 13196  | 29489  | 46656  | 156161  | 112601  |
| 20511  | 37797  | 2814   | 240682  | 8973    |
| 15577  | 43820  | 10515  | 172526  | 17934   |
| 6321   | 11878  | 883    | 137354  | 1841    |
| 8078   | 14047  | 4576   | 115851  | 5596    |
| 24650  | 18138  | 6193   | 64098   | 16782   |
| 9511   | 4895   | 10035  | 78871   | 6932    |
| 6339   | 10423  | 8175   | 39735   | 17594   |
| 5866   | 4634   | 6493   | 63899   | 5475    |
| 8294   | 5452   | 8195   | 25208   | 28330   |
| 5090   | 6269   | 4575   | 85702   | 1335    |
| 2335   | 4024   | 12753  | 17484   | 13042   |
| 1885   | 3731   | 944    | 56571   | 1022    |
| 2909   | 3032   | 2809   | 26495   | 4615    |
| 4625   | 7899   | 1763   | 37455   | 2969    |

|      |       |       |       |      |
|------|-------|-------|-------|------|
| 4139 | 7982  | 2881  | 16454 | 4816 |
| 2331 | 2456  | 2873  | 23217 | 5000 |
| 3267 | 2123  | 1631  | 17176 | 4814 |
| 1170 | 2961  | 1222  | 26852 | 1009 |
| 1093 | 6547  | 325   | 15993 | 1373 |
| 5178 | 18805 | 686   | 14069 | 870  |
| 1605 | 2430  | 1312  | 7665  | 3686 |
| 1741 | 1043  | 2842  | 5637  | 6404 |
| 4320 | 6596  | 368   | 8157  | 1026 |
| 1947 | 4366  | 1066  | 9427  | 2036 |
| 1359 | 3053  | 969   | 8717  | 1998 |
| 1287 | 2430  | 1563  | 15733 | 1630 |
| 1265 | 1977  | 3252  | 8322  | 5761 |
| 407  | 1145  | 497   | 22869 | 788  |
| 488  | 949   | 271   | 76995 | 433  |
| 1770 | 4041  | 984   | 8871  | 1927 |
| 4187 | 1714  | 501   | 7546  | 4579 |
| 4263 | 8385  | 988   | 10993 | 2027 |
| 2995 | 10557 | 525   | 7827  | 1363 |
| 922  | 3605  | 576   | 4504  | 4960 |
| 381  | 1106  | 12046 | 2705  | 5636 |
| 1036 | 1343  | 674   | 6053  | 3358 |
| 485  | 887   | 2679  | 5165  | 3586 |
| 1230 | 1605  | 699   | 3430  | 2625 |
| 1565 | 2000  | 165   | 9282  | 300  |
| 2131 | 2015  | 854   | 4660  | 1427 |
| 462  | 933   | 953   | 4707  | 976  |
| 396  | 1629  | 293   | 5009  | 625  |
| 243  | 428   | 2696  | 2910  | 2186 |
| 65   | 64    | 72    | 1555  | 93   |
| 230  | 1196  | 310   | 14430 | 312  |
| 568  | 614   | 125   | 228   | 1635 |
| 408  | 1128  | 225   | 9671  | 438  |
| 735  | 459   | 153   | 2961  | 1098 |
| 267  | 1249  | 566   | 4930  | 780  |
| 196  | 653   | 348   | 3067  | 341  |
| 72   | 101   | 26    | 2354  | 37   |
| 497  | 739   | 181   | 3173  | 598  |
| 122  | 572   | 478   | 4670  | 676  |
| 429  | 591   | 688   | 2787  | 791  |
| 239  | 1147  | 1042  | 1855  | 1146 |
| 345  | 488   | 250   | 5044  | 612  |
| 321  | 566   | 449   | 4143  | 737  |
| 224  | 600   | 31    | 2776  | 68   |
| 31   | 68    | 7     | 701   | 42   |
| 580  | 292   | 1137  | 702   | 1509 |
| 417  | 405   | 60    | 2624  | 251  |
| 358  | 249   | 111   | 5181  | 117  |
| 157  | 183   | 40    | 2302  | 99   |
| 232  | 291   | 84    | 3407  | 241  |
| 1256 | 1359  | 44    | 427   | 398  |
| 252  | 390   | 308   | 1576  | 580  |
| 261  | 244   | 538   | 677   | 1487 |
| 150  | 281   | 79    | 3887  | 70   |
| 443  | 342   | 141   | 1607  | 250  |
| 74   | 286   | 78    | 1464  | 133  |
| 169  | 192   | 160   | 223   | 809  |
| 276  | 501   | 150   | 880   | 345  |
| 336  | 930   | 110   | 390   | 535  |

|     |     |     |      |     |
|-----|-----|-----|------|-----|
| 86  | 160 | 758 | 1084 | 817 |
| 323 | 606 | 63  | 2441 | 376 |
| 186 | 345 | 86  | 997  | 233 |
| 113 | 227 | 306 | 1046 | 766 |
| 299 | 494 | 297 | 523  | 845 |
| 138 | 25  | 28  | 7527 | 58  |
| 97  | 310 | 35  | 1681 | 71  |
| 55  | 122 | 107 | 1084 | 397 |
| 144 | 270 | 328 | 511  | 628 |
| 83  | 229 | 34  | 1643 | 59  |
| 166 | 260 | 128 | 1415 | 88  |
| 68  | 299 | 368 | 535  | 502 |
| 120 | 140 | 206 | 512  | 338 |
| 13  | 3   | 1   | 193  | 16  |
| 41  | 80  | 229 | 656  | 187 |
| 49  | 122 | 39  | 755  | 51  |
| 58  | 81  | 20  | 1978 | 37  |
| 45  | 203 | 106 | 1775 | 73  |
| 59  | 115 | 194 | 465  | 330 |
| 79  | 81  | 129 | 472  | 332 |
| 50  | 179 | 106 | 244  | 286 |
| 124 | 109 | 11  | 1562 | 32  |
| 98  | 57  | 8   | 434  | 247 |
| 39  | 115 | 28  | 635  | 105 |
| 85  | 117 | 418 | 461  | 299 |
| 155 | 603 | 55  | 357  | 79  |
| 142 | 120 | 18  | 958  | 72  |
| 32  | 64  | 23  | 1094 | 27  |
| 55  | 85  | 78  | 609  | 167 |
| 101 | 177 | 28  | 587  | 82  |
| 82  | 52  | 15  | 1263 | 33  |
| 118 | 75  | 11  | 682  | 47  |
| 36  | 159 | 67  | 774  | 92  |
| 39  | 80  | 90  | 247  | 177 |
| 26  | 46  | 28  | 695  | 214 |
| 76  | 127 | 6   | 328  | 39  |
| 33  | 110 | 110 | 275  | 127 |
| 49  | 53  | 146 | 339  | 141 |
| 19  | 82  | 52  | 390  | 220 |
| 23  | 75  | 26  | 685  | 30  |
| 23  | 75  | 26  | 685  | 30  |
| 87  | 119 | 30  | 356  | 217 |
| 76  | 38  | 32  | 336  | 111 |
| 74  | 56  | 90  | 518  | 208 |
| 15  | 57  | 6   | 56   | 49  |
| 17  | 69  | 35  | 621  | 68  |
| 3   | 4   | 4   | 457  | 2   |
| 54  | 35  | 103 | 443  | 113 |
| 62  | 110 | 23  | 101  | 48  |
| 12  | 16  | 53  | 434  | 144 |
| 38  | 85  | 7   | 136  | 232 |
| 9   | 19  | 69  | 133  | 167 |
| 37  | 0   | 5   | 37   | 49  |
| 10  | 23  | 64  | 411  | 46  |
| 20  | 139 | 13  | 280  | 50  |
| 69  | 29  | 8   | 345  | 80  |
| 8   | 16  | 8   | 648  | 14  |
| 46  | 70  | 31  | 285  | 76  |
| 84  | 43  | 41  | 215  | 45  |

|    |    |     |     |     |
|----|----|-----|-----|-----|
| 17 | 24 | 21  | 209 | 58  |
| 7  | 27 | 19  | 261 | 24  |
| 24 | 31 | 26  | 245 | 80  |
| 33 | 88 | 35  | 121 | 109 |
| 76 | 40 | 17  | 258 | 50  |
| 11 | 30 | 321 | 180 | 163 |
| 6  | 32 | 24  | 206 | 21  |
| 23 | 14 | 1   | 302 | 6   |
| 46 | 16 | 34  | 112 | 177 |
| 4  | 21 | 50  | 182 | 68  |
| 13 | 33 | 9   | 234 | 16  |
| 27 | 29 | 42  | 136 | 28  |
| 22 | 12 | 3   | 65  | 55  |
| 17 | 32 | 23  | 249 | 14  |
| 30 | 28 | 7   | 185 | 17  |
| 8  | 15 | 10  | 63  | 21  |
| 2  | 18 | 36  | 158 | 64  |
| 1  | 2  | 112 | 327 | 43  |
| 49 | 12 | 11  | 45  | 69  |
| 48 | 57 | 6   | 90  | 44  |
| 28 | 34 | 7   | 164 | 70  |
| 18 | 21 | 13  | 138 | 43  |
| 14 | 23 | 20  | 74  | 88  |
| 4  | 0  | 1   | 118 | 1   |
| 15 | 20 | 24  | 188 | 46  |
| 12 | 22 | 24  | 79  | 107 |
| 17 | 21 | 7   | 493 | 3   |
| 1  | 20 | 5   | 357 | 7   |
| 18 | 21 | 106 | 67  | 83  |
| 20 | 28 | 9   | 81  | 45  |
| 71 | 26 | 20  | 469 | 121 |
| 2  | 9  | 1   | 155 | 4   |
| 35 | 20 | 23  | 103 | 97  |
| 3  | 1  | 17  | 256 | 0   |
| 16 | 21 | 12  | 182 | 8   |
| 23 | 31 | 37  | 99  | 61  |
| 13 | 27 | 16  | 202 | 29  |
| 5  | 25 | 9   | 402 | 9   |
| 8  | 15 | 21  | 36  | 46  |
| 18 | 5  | 5   | 26  | 21  |
| 13 | 29 | 9   | 155 | 10  |
| 21 | 20 | 7   | 220 | 54  |
| 7  | 12 | 12  | 20  | 67  |
| 26 | 27 | 18  | 119 | 97  |
| 5  | 23 | 3   | 292 | 5   |
| 7  | 5  | 2   | 5   | 40  |
| 18 | 42 | 7   | 161 | 0   |
| 16 | 14 | 19  | 53  | 40  |
| 13 | 23 | 52  | 80  | 72  |
| 5  | 22 | 3   | 275 | 5   |
| 6  | 12 | 8   | 16  | 42  |
| 14 | 15 | 15  | 166 | 24  |
| 17 | 49 | 7   | 169 | 8   |
| 1  | 0  | 11  | 0   | 2   |
| 23 | 43 | 4   | 417 | 3   |
| 11 | 37 | 10  | 136 | 19  |
| 8  | 12 | 60  | 27  | 42  |
| 41 | 37 | 11  | 60  | 32  |
| 19 | 21 | 8   | 48  | 15  |

|    |     |    |     |    |
|----|-----|----|-----|----|
| 1  | 12  | 5  | 108 | 1  |
| 15 | 12  | 17 | 73  | 34 |
| 19 | 10  | 6  | 208 | 17 |
| 4  | 2   | 13 | 62  | 26 |
| 0  | 17  | 37 | 19  | 57 |
| 13 | 29  | 6  | 34  | 18 |
| 3  | 6   | 22 | 61  | 80 |
| 9  | 6   | 11 | 59  | 22 |
| 18 | 6   | 1  | 156 | 3  |
| 4  | 5   | 3  | 2   | 34 |
| 9  | 22  | 11 | 59  | 59 |
| 0  | 10  | 13 | 79  | 40 |
| 3  | 9   | 17 | 117 | 23 |
| 14 | 8   | 30 | 57  | 56 |
| 10 | 10  | 2  | 23  | 48 |
| 0  | 10  | 16 | 75  | 17 |
| 3  | 20  | 0  | 44  | 5  |
| 11 | 2   | 14 | 43  | 66 |
| 4  | 17  | 4  | 109 | 6  |
| 5  | 24  | 12 | 69  | 23 |
| 3  | 13  | 12 | 94  | 11 |
| 7  | 22  | 5  | 103 | 12 |
| 0  | 2   | 0  | 14  | 1  |
| 6  | 22  | 3  | 52  | 16 |
| 71 | 113 | 1  | 38  | 7  |
| 8  | 9   | 6  | 46  | 28 |
| 7  | 13  | 3  | 76  | 9  |
| 15 | 6   | 8  | 78  | 19 |
| 4  | 3   | 1  | 3   | 7  |
| 6  | 14  | 18 | 25  | 47 |
| 3  | 2   | 22 | 29  | 14 |
| 7  | 7   | 9  | 25  | 27 |
| 10 | 9   | 4  | 43  | 42 |
| 13 | 16  | 3  | 56  | 9  |
| 7  | 20  | 2  | 115 | 6  |
| 10 | 9   | 1  | 27  | 27 |
| 1  | 11  | 0  | 75  | 1  |
| 6  | 6   | 9  | 64  | 32 |
| 4  | 7   | 5  | 51  | 2  |
| 4  | 4   | 7  | 20  | 20 |
| 5  | 6   | 3  | 39  | 19 |
| 4  | 4   | 1  | 125 | 2  |
| 1  | 11  | 3  | 123 | 2  |
| 6  | 9   | 6  | 31  | 6  |
| 4  | 2   | 4  | 10  | 4  |
| 3  | 11  | 7  | 86  | 1  |
| 12 | 31  | 1  | 87  | 0  |
| 5  | 9   | 3  | 26  | 4  |
| 5  | 9   | 3  | 26  | 4  |
| 1  | 3   | 4  | 1   | 27 |
| 13 | 3   | 2  | 26  | 12 |
| 8  | 5   | 2  | 13  | 7  |
| 3  | 2   | 5  | 7   | 10 |
| 7  | 10  | 9  | 47  | 11 |
| 2  | 3   | 6  | 49  | 11 |
| 8  | 3   | 4  | 54  | 3  |
| 12 | 6   | 7  | 30  | 11 |
| 2  | 6   | 7  | 14  | 10 |
| 4  | 9   | 6  | 107 | 6  |

|   |    |    |     |    |
|---|----|----|-----|----|
| 4 | 23 | 2  | 10  | 6  |
| 7 | 7  | 8  | 25  | 9  |
| 9 | 7  | 2  | 43  | 6  |
| 2 | 0  | 0  | 30  | 0  |
| 8 | 5  | 5  | 40  | 12 |
| 1 | 9  | 3  | 169 | 4  |
| 0 | 12 | 16 | 15  | 18 |
| 3 | 2  | 5  | 7   | 30 |
| 1 | 9  | 3  | 165 | 4  |
| 0 | 8  | 5  | 22  | 15 |
| 1 | 3  | 3  | 4   | 16 |
| 4 | 1  | 3  | 80  | 7  |
| 5 | 2  | 9  | 27  | 12 |
| 1 | 0  | 0  | 8   | 0  |
| 0 | 5  | 18 | 17  | 17 |
| 5 | 7  | 4  | 7   | 34 |
| 2 | 4  | 3  | 18  | 26 |
| 2 | 3  | 4  | 8   | 10 |
| 1 | 7  | 1  | 19  | 2  |
| 6 | 1  | 0  | 29  | 0  |
| 3 | 3  | 0  | 15  | 17 |
| 3 | 4  | 2  | 71  | 2  |
| 7 | 14 | 4  | 43  | 95 |
| 4 | 3  | 12 | 15  | 15 |
| 0 | 2  | 6  | 69  | 9  |
| 7 | 13 | 1  | 18  | 12 |
| 1 | 2  | 1  | 2   | 27 |
| 2 | 6  | 6  | 30  | 10 |
| 2 | 3  | 0  | 5   | 9  |
| 2 | 6  | 6  | 22  | 10 |
| 3 | 5  | 3  | 18  | 13 |
| 1 | 8  | 2  | 18  | 14 |
| 3 | 4  | 2  | 65  | 2  |
| 3 | 0  | 7  | 7   | 13 |
| 3 | 0  | 0  | 28  | 1  |
| 1 | 5  | 0  | 60  | 3  |
| 4 | 17 | 0  | 21  | 0  |
| 3 | 2  | 2  | 8   | 5  |
| 3 | 3  | 0  | 59  | 0  |
| 0 | 0  | 31 | 39  | 22 |
| 2 | 4  | 3  | 4   | 7  |
| 8 | 11 | 4  | 62  | 3  |
| 9 | 7  | 2  | 14  | 13 |
| 3 | 2  | 2  | 48  | 8  |
| 0 | 1  | 3  | 35  | 4  |
| 1 | 0  | 0  | 6   | 2  |
| 1 | 3  | 8  | 3   | 10 |
| 0 | 8  | 5  | 14  | 19 |
| 0 | 2  | 4  | 14  | 10 |
| 7 | 2  | 11 | 3   | 21 |
| 1 | 9  | 5  | 33  | 3  |
| 0 | 3  | 6  | 27  | 15 |
| 1 | 2  | 2  | 24  | 23 |
| 2 | 2  | 7  | 17  | 17 |
| 1 | 1  | 1  | 14  | 11 |
| 0 | 5  | 3  | 27  | 5  |
| 7 | 10 | 5  | 13  | 7  |
| 2 | 7  | 2  | 45  | 0  |
| 0 | 6  | 0  | 54  | 3  |

|   |    |    |    |    |
|---|----|----|----|----|
| 8 | 2  | 4  | 17 | 6  |
| 6 | 11 | 1  | 25 | 2  |
| 5 | 2  | 2  | 18 | 10 |
| 2 | 3  | 4  | 9  | 1  |
| 2 | 0  | 3  | 17 | 6  |
| 0 | 1  | 3  | 17 | 5  |
| 1 | 5  | 3  | 17 | 6  |
| 4 | 11 | 0  | 57 | 1  |
| 2 | 1  | 5  | 25 | 4  |
| 2 | 1  | 0  | 2  | 3  |
| 2 | 4  | 0  | 17 | 8  |
| 2 | 4  | 1  | 2  | 4  |
| 5 | 3  | 1  | 35 | 4  |
| 2 | 2  | 2  | 11 | 10 |
| 6 | 2  | 0  | 15 | 2  |
| 8 | 3  | 0  | 8  | 15 |
| 0 | 1  | 2  | 9  | 3  |
| 2 | 2  | 1  | 7  | 14 |
| 0 | 0  | 0  | 31 | 0  |
| 4 | 1  | 1  | 17 | 2  |
| 1 | 5  | 0  | 16 | 2  |
| 5 | 4  | 1  | 10 | 2  |
| 3 | 4  | 4  | 25 | 6  |
| 0 | 1  | 9  | 6  | 9  |
| 1 | 2  | 0  | 1  | 0  |
| 1 | 1  | 2  | 13 | 9  |
| 4 | 2  | 7  | 14 | 4  |
| 2 | 2  | 6  | 21 | 16 |
| 2 | 0  | 1  | 10 | 1  |
| 2 | 4  | 4  | 22 | 5  |
| 1 | 4  | 12 | 6  | 5  |
| 2 | 4  | 5  | 13 | 2  |
| 2 | 3  | 2  | 10 | 15 |
| 0 | 0  | 0  | 1  | 0  |
| 2 | 3  | 1  | 23 | 4  |
| 1 | 3  | 2  | 17 | 7  |
| 2 | 2  | 1  | 14 | 3  |
| 1 | 0  | 2  | 18 | 0  |
| 0 | 12 | 1  | 8  | 9  |
| 0 | 1  | 0  | 73 | 0  |
| 0 | 6  | 2  | 8  | 13 |
| 8 | 1  | 2  | 28 | 6  |
| 0 | 1  | 0  | 23 | 2  |
| 1 | 0  | 0  | 14 | 1  |
| 1 | 0  | 0  | 28 | 1  |
| 3 | 6  | 1  | 16 | 2  |
| 2 | 0  | 3  | 26 | 4  |
| 1 | 1  | 2  | 27 | 2  |
| 3 | 4  | 0  | 7  | 5  |
| 3 | 2  | 0  | 10 | 4  |
| 2 | 0  | 3  | 1  | 5  |
| 0 | 3  | 0  | 1  | 1  |
| 0 | 0  | 0  | 27 | 0  |
| 0 | 1  | 1  | 58 | 0  |
| 0 | 2  | 0  | 6  | 6  |
| 1 | 2  | 2  | 10 | 3  |
| 0 | 3  | 0  | 1  | 6  |
| 2 | 0  | 2  | 9  | 1  |
| 1 | 1  | 1  | 11 | 4  |



|   |   |    |    |    |
|---|---|----|----|----|
| 1 | 2 | 6  | 3  | 5  |
| 0 | 1 | 1  | 15 | 0  |
| 1 | 1 | 0  | 0  | 6  |
| 1 | 1 | 1  | 9  | 2  |
| 0 | 1 | 1  | 2  | 10 |
| 1 | 1 | 2  | 8  | 8  |
| 0 | 1 | 3  | 6  | 2  |
| 1 | 2 | 10 | 10 | 1  |
| 1 | 3 | 1  | 9  | 0  |
| 0 | 2 | 0  | 3  | 2  |
| 1 | 1 | 0  | 5  | 10 |
| 2 | 4 | 4  | 3  | 4  |
| 0 | 2 | 1  | 13 | 2  |
| 0 | 0 | 1  | 12 | 0  |
| 0 | 0 | 4  | 8  | 4  |
| 1 | 4 | 0  | 17 | 1  |
| 0 | 0 | 0  | 20 | 1  |
| 0 | 1 | 1  | 4  | 4  |
| 1 | 0 | 0  | 0  | 0  |
| 1 | 0 | 0  | 20 | 2  |
| 3 | 0 | 1  | 2  | 3  |
| 0 | 2 | 1  | 6  | 5  |
| 3 | 4 | 0  | 8  | 2  |
| 0 | 0 | 3  | 8  | 3  |
| 1 | 5 | 0  | 4  | 6  |
| 1 | 0 | 0  | 1  | 2  |
| 0 | 1 | 2  | 8  | 2  |
| 1 | 3 | 3  | 7  | 0  |
| 0 | 4 | 0  | 5  | 0  |
| 0 | 1 | 1  | 12 | 1  |
| 1 | 1 | 1  | 6  | 0  |
| 1 | 2 | 0  | 2  | 3  |
| 2 | 1 | 2  | 7  | 5  |
| 0 | 0 | 1  | 21 | 0  |
| 1 | 0 | 1  | 3  | 6  |
| 0 | 3 | 2  | 0  | 6  |
| 0 | 2 | 0  | 23 | 0  |
| 0 | 0 | 0  | 9  | 1  |
| 0 | 1 | 0  | 1  | 0  |
| 0 | 0 | 2  | 16 | 0  |
| 1 | 0 | 2  | 5  | 3  |
| 0 | 1 | 2  | 6  | 1  |
| 2 | 2 | 1  | 1  | 5  |
| 1 | 0 | 4  | 2  | 0  |
| 0 | 0 | 0  | 10 | 0  |
| 1 | 0 | 0  | 0  | 1  |
| 1 | 0 | 1  | 3  | 2  |
| 0 | 3 | 1  | 26 | 1  |
| 0 | 1 | 1  | 2  | 4  |
| 0 | 3 | 5  | 2  | 3  |
| 1 | 0 | 1  | 3  | 1  |
| 1 | 5 | 0  | 18 | 0  |
| 0 | 0 | 2  | 8  | 1  |
| 1 | 2 | 0  | 13 | 1  |
| 2 | 1 | 0  | 5  | 4  |
| 1 | 2 | 1  | 10 | 1  |
| 0 | 0 | 0  | 14 | 0  |
| 0 | 1 | 2  | 4  | 0  |
| 1 | 1 | 1  | 8  | 3  |

|   |   |   |    |    |
|---|---|---|----|----|
| 1 | 0 | 8 | 2  | 8  |
| 1 | 1 | 0 | 18 | 4  |
| 0 | 0 | 0 | 7  | 2  |
| 0 | 1 | 2 | 1  | 0  |
| 1 | 2 | 3 | 3  | 0  |
| 0 | 1 | 1 | 8  | 1  |
| 0 | 1 | 0 | 0  | 1  |
| 0 | 0 | 0 | 1  | 0  |
| 0 | 0 | 4 | 5  | 0  |
| 0 | 3 | 0 | 2  | 2  |
| 0 | 2 | 0 | 5  | 0  |
| 0 | 0 | 1 | 6  | 3  |
| 0 | 1 | 0 | 2  | 0  |
| 0 | 1 | 0 | 24 | 0  |
| 1 | 3 | 0 | 3  | 7  |
| 1 | 1 | 2 | 3  | 2  |
| 1 | 1 | 0 | 3  | 4  |
| 0 | 1 | 1 | 6  | 0  |
| 1 | 3 | 0 | 9  | 0  |
| 0 | 0 | 1 | 2  | 13 |
| 0 | 2 | 0 | 13 | 1  |
| 0 | 0 | 0 | 6  | 0  |
| 0 | 3 | 0 | 4  | 1  |
| 0 | 1 | 0 | 6  | 0  |
| 1 | 0 | 1 | 0  | 0  |
| 1 | 1 | 0 | 9  | 2  |
| 0 | 0 | 1 | 5  | 1  |
| 0 | 0 | 2 | 5  | 3  |
| 0 | 1 | 5 | 2  | 4  |
| 0 | 3 | 1 | 2  | 1  |
| 0 | 2 | 0 | 3  | 0  |
| 0 | 5 | 0 | 15 | 0  |
| 0 | 2 | 1 | 1  | 0  |
| 0 | 0 | 1 | 13 | 0  |
| 0 | 0 | 0 | 4  | 1  |
| 0 | 0 | 0 | 5  | 0  |
| 0 | 0 | 0 | 0  | 3  |
| 1 | 2 | 2 | 3  | 1  |
| 0 | 0 | 0 | 14 | 0  |
| 0 | 0 | 0 | 0  | 1  |
| 0 | 1 | 0 | 3  | 1  |
| 2 | 0 | 0 | 3  | 0  |
| 0 | 1 | 0 | 4  | 1  |
| 0 | 0 | 0 | 1  | 0  |
| 0 | 1 | 0 | 14 | 0  |
| 1 | 0 | 0 | 0  | 1  |
| 2 | 0 | 0 | 7  | 0  |
| 0 | 1 | 0 | 7  | 0  |
| 0 | 1 | 0 | 13 | 0  |
| 1 | 5 | 1 | 3  | 3  |
| 2 | 0 | 2 | 2  | 3  |
| 1 | 0 | 0 | 6  | 0  |
| 0 | 0 | 0 | 4  | 6  |
| 0 | 0 | 0 | 0  | 2  |
| 0 | 0 | 1 | 8  | 0  |
| 1 | 0 | 0 | 3  | 0  |
| 0 | 0 | 0 | 0  | 0  |
| 0 | 1 | 0 | 2  | 3  |
| 2 | 1 | 0 | 0  | 0  |

|   |   |   |   |   |
|---|---|---|---|---|
| 0 | 0 | 1 | 5 | 0 |
| 0 | 0 | 0 | 2 | 2 |
| 0 | 1 | 0 | 4 | 1 |
| 0 | 1 | 1 | 1 | 1 |
| 0 | 0 | 0 | 8 | 0 |
| 0 | 1 | 0 | 6 | 0 |
| 1 | 1 | 0 | 4 | 7 |
| 0 | 0 | 0 | 4 | 0 |
| 0 | 0 | 0 | 3 | 2 |
| 0 | 3 | 1 | 2 | 1 |
| 0 | 0 | 1 | 3 | 1 |
| 0 | 0 | 0 | 1 | 0 |
| 2 | 1 | 0 | 3 | 0 |
| 0 | 2 | 0 | 1 | 1 |
| 2 | 0 | 0 | 0 | 3 |
| 1 | 0 | 0 | 2 | 1 |
| 0 | 1 | 1 | 1 | 5 |
| 0 | 0 | 0 | 4 | 0 |
| 0 | 0 | 0 | 0 | 0 |
| 0 | 1 | 1 | 4 | 0 |
| 0 | 0 | 0 | 2 | 0 |
| 1 | 0 | 2 | 1 | 1 |
| 0 | 0 | 0 | 2 | 3 |
| 0 | 0 | 0 | 2 | 0 |
| 1 | 1 | 3 | 3 | 1 |
| 0 | 0 | 0 | 4 | 0 |
| 0 | 1 | 0 | 8 | 0 |
| 1 | 0 | 2 | 3 | 1 |
| 1 | 0 | 2 | 1 | 0 |
| 0 | 1 | 0 | 2 | 0 |
| 0 | 0 | 2 | 1 | 0 |
| 0 | 0 | 0 | 5 | 1 |
| 0 | 0 | 2 | 1 | 3 |
| 0 | 3 | 0 | 1 | 2 |
| 0 | 1 | 1 | 0 | 0 |
| 0 | 0 | 0 | 0 | 1 |
| 0 | 0 | 0 | 0 | 1 |
| 2 | 0 | 0 | 0 | 1 |

|        |        |        |         |         |
|--------|--------|--------|---------|---------|
| 0.89   | 0.99   | 0.03   | 0.53    | 0.99    |
| 4      | 1      | 27     | 18      | 2       |
| 1      | 1      | 1      | 1       | 1       |
| 10     | 11     | 12     | 13      | 14      |
| 10     | 11     | 12     | 13      | 14      |
| C_41   | C_42   | C_44   | C_46    | C_47    |
| UC     | UC     | UC     | UC      | UC      |
| 623719 | 774447 | 627333 | 2772220 | 1217409 |
| UC     | UC     | UC     | UC      | UC      |
| 307256 | 262633 | 268518 | 548517  | 620936  |
| 50961  | 99661  | 9784   | 105685  | 53388   |
| 23541  | 38127  | 118333 | 125439  | 104165  |
| 37177  | 36863  | 41106  | 160662  | 85023   |
| 13196  | 29489  | 46656  | 156161  | 112601  |

|       |       |       |        |       |
|-------|-------|-------|--------|-------|
| 20511 | 37797 | 2814  | 240682 | 8973  |
| 15577 | 43820 | 10515 | 172526 | 17934 |
| 6321  | 11878 | 883   | 137354 | 1841  |
| 8078  | 14047 | 4576  | 115851 | 5596  |
| 24650 | 18138 | 6193  | 64098  | 16782 |
| 9511  | 4895  | 10035 | 78871  | 6932  |
| 6339  | 10423 | 8175  | 39735  | 17594 |
| 5866  | 4634  | 6493  | 63899  | 5475  |
| 8294  | 5452  | 8195  | 25208  | 28330 |
| 5090  | 6269  | 4575  | 85702  | 1335  |
| 2335  | 4024  | 12753 | 17484  | 13042 |
| 1885  | 3731  | 944   | 56571  | 1022  |
| 2909  | 3032  | 2809  | 26495  | 4615  |
| 4625  | 7899  | 1763  | 37455  | 2969  |
| 4139  | 7982  | 2881  | 16454  | 4816  |
| 2331  | 2456  | 2873  | 23217  | 5000  |
| 3267  | 2123  | 1631  | 17176  | 4814  |
| 1170  | 2961  | 1222  | 26852  | 1009  |
| 1093  | 6547  | 325   | 15993  | 1373  |
| 5178  | 18805 | 686   | 14069  | 870   |
| 1605  | 2430  | 1312  | 7665   | 3686  |
| 1741  | 1043  | 2842  | 5637   | 6404  |
| 4320  | 6596  | 368   | 8157   | 1026  |
| 1947  | 4366  | 1066  | 9427   | 2036  |
| 1359  | 3053  | 969   | 8717   | 1998  |
| 1287  | 2430  | 1563  | 15733  | 1630  |
| 1265  | 1977  | 3252  | 8322   | 5761  |
| 407   | 1145  | 497   | 22869  | 788   |
| 488   | 949   | 271   | 76995  | 433   |
| 1770  | 4041  | 984   | 8871   | 1927  |
| 4187  | 1714  | 501   | 7546   | 4579  |
| 4263  | 8385  | 988   | 10993  | 2027  |
| 2995  | 10557 | 525   | 7827   | 1363  |
| 922   | 3605  | 576   | 4504   | 4960  |
| 381   | 1106  | 12046 | 2705   | 5636  |
| 1036  | 1343  | 674   | 6053   | 3358  |
| 485   | 887   | 2679  | 5165   | 3586  |
| 1230  | 1605  | 699   | 3430   | 2625  |
| 1565  | 2000  | 165   | 9282   | 300   |
| 2131  | 2015  | 854   | 4660   | 1427  |
| 462   | 933   | 953   | 4707   | 976   |
| 396   | 1629  | 293   | 5009   | 625   |
| 243   | 428   | 2696  | 2910   | 2186  |
| 65    | 64    | 72    | 1555   | 93    |
| 230   | 1196  | 310   | 14430  | 312   |
| 568   | 614   | 125   | 228    | 1635  |
| 408   | 1128  | 225   | 9671   | 438   |
| 735   | 459   | 153   | 2961   | 1098  |
| 267   | 1249  | 566   | 4930   | 780   |
| 196   | 653   | 348   | 3067   | 341   |
| 72    | 101   | 26    | 2354   | 37    |
| 497   | 739   | 181   | 3173   | 598   |
| 122   | 572   | 478   | 4670   | 676   |
| 429   | 591   | 688   | 2787   | 791   |
| 239   | 1147  | 1042  | 1855   | 1146  |
| 345   | 488   | 250   | 5044   | 612   |
| 321   | 566   | 449   | 4143   | 737   |
| 224   | 600   | 31    | 2776   | 68    |
| 31    | 68    | 7     | 701    | 42    |

|      |      |      |      |      |
|------|------|------|------|------|
| 580  | 292  | 1137 | 702  | 1509 |
| 417  | 405  | 60   | 2624 | 251  |
| 358  | 249  | 111  | 5181 | 117  |
| 157  | 183  | 40   | 2302 | 99   |
| 232  | 291  | 84   | 3407 | 241  |
| 1256 | 1359 | 44   | 427  | 398  |
| 252  | 390  | 308  | 1576 | 580  |
| 261  | 244  | 538  | 677  | 1487 |
| 150  | 281  | 79   | 3887 | 70   |
| 443  | 342  | 141  | 1607 | 250  |
| 74   | 286  | 78   | 1464 | 133  |
| 169  | 192  | 160  | 223  | 809  |
| 276  | 501  | 150  | 880  | 345  |
| 336  | 930  | 110  | 390  | 535  |
| 86   | 160  | 758  | 1084 | 817  |
| 323  | 606  | 63   | 2441 | 376  |
| 186  | 345  | 86   | 997  | 233  |
| 113  | 227  | 306  | 1046 | 766  |
| 299  | 494  | 297  | 523  | 845  |
| 138  | 25   | 28   | 7527 | 58   |
| 97   | 310  | 35   | 1681 | 71   |
| 55   | 122  | 107  | 1084 | 397  |
| 144  | 270  | 328  | 511  | 628  |
| 83   | 229  | 34   | 1643 | 59   |
| 166  | 260  | 128  | 1415 | 88   |
| 68   | 299  | 368  | 535  | 502  |
| 120  | 140  | 206  | 512  | 338  |
| 13   | 3    | 1    | 193  | 16   |
| 41   | 80   | 229  | 656  | 187  |
| 49   | 122  | 39   | 755  | 51   |
| 58   | 81   | 20   | 1978 | 37   |
| 45   | 203  | 106  | 1775 | 73   |
| 59   | 115  | 194  | 465  | 330  |
| 79   | 81   | 129  | 472  | 332  |
| 50   | 179  | 106  | 244  | 286  |
| 124  | 109  | 11   | 1562 | 32   |
| 98   | 57   | 8    | 434  | 247  |
| 39   | 115  | 28   | 635  | 105  |
| 85   | 117  | 418  | 461  | 299  |
| 155  | 603  | 55   | 357  | 79   |
| 142  | 120  | 18   | 958  | 72   |
| 32   | 64   | 23   | 1094 | 27   |
| 55   | 85   | 78   | 609  | 167  |
| 101  | 177  | 28   | 587  | 82   |
| 82   | 52   | 15   | 1263 | 33   |
| 118  | 75   | 11   | 682  | 47   |
| 36   | 159  | 67   | 774  | 92   |
| 39   | 80   | 90   | 247  | 177  |
| 26   | 46   | 28   | 695  | 214  |
| 76   | 127  | 6    | 328  | 39   |
| 33   | 110  | 110  | 275  | 127  |
| 49   | 53   | 146  | 339  | 141  |
| 19   | 82   | 52   | 390  | 220  |
| 23   | 75   | 26   | 685  | 30   |
| 23   | 75   | 26   | 685  | 30   |
| 87   | 119  | 30   | 356  | 217  |
| 76   | 38   | 32   | 336  | 111  |
| 74   | 56   | 90   | 518  | 208  |
| 15   | 57   | 6    | 56   | 49   |

|    |     |     |     |     |
|----|-----|-----|-----|-----|
| 17 | 69  | 35  | 621 | 68  |
| 3  | 4   | 4   | 457 | 2   |
| 54 | 35  | 103 | 443 | 113 |
| 62 | 110 | 23  | 101 | 48  |
| 12 | 16  | 53  | 434 | 144 |
| 38 | 85  | 7   | 136 | 232 |
| 9  | 19  | 69  | 133 | 167 |
| 37 | 0   | 5   | 37  | 49  |
| 10 | 23  | 64  | 411 | 46  |
| 20 | 139 | 13  | 280 | 50  |
| 69 | 29  | 8   | 345 | 80  |
| 8  | 16  | 8   | 648 | 14  |
| 46 | 70  | 31  | 285 | 76  |
| 84 | 43  | 41  | 215 | 45  |
| 17 | 24  | 21  | 209 | 58  |
| 7  | 27  | 19  | 261 | 24  |
| 24 | 31  | 26  | 245 | 80  |
| 33 | 88  | 35  | 121 | 109 |
| 76 | 40  | 17  | 258 | 50  |
| 11 | 30  | 321 | 180 | 163 |
| 6  | 32  | 24  | 206 | 21  |
| 23 | 14  | 1   | 302 | 6   |
| 46 | 16  | 34  | 112 | 177 |
| 4  | 21  | 50  | 182 | 68  |
| 13 | 33  | 9   | 234 | 16  |
| 27 | 29  | 42  | 136 | 28  |
| 22 | 12  | 3   | 65  | 55  |
| 17 | 32  | 23  | 249 | 14  |
| 30 | 28  | 7   | 185 | 17  |
| 8  | 15  | 10  | 63  | 21  |
| 2  | 18  | 36  | 158 | 64  |
| 1  | 2   | 112 | 327 | 43  |
| 49 | 12  | 11  | 45  | 69  |
| 48 | 57  | 6   | 90  | 44  |
| 28 | 34  | 7   | 164 | 70  |
| 18 | 21  | 13  | 138 | 43  |
| 14 | 23  | 20  | 74  | 88  |
| 4  | 0   | 1   | 118 | 1   |
| 15 | 20  | 24  | 188 | 46  |
| 12 | 22  | 24  | 79  | 107 |
| 17 | 21  | 7   | 493 | 3   |
| 1  | 20  | 5   | 357 | 7   |
| 18 | 21  | 106 | 67  | 83  |
| 20 | 28  | 9   | 81  | 45  |
| 71 | 26  | 20  | 469 | 121 |
| 2  | 9   | 1   | 155 | 4   |
| 35 | 20  | 23  | 103 | 97  |
| 3  | 1   | 17  | 256 | 0   |
| 16 | 21  | 12  | 182 | 8   |
| 23 | 31  | 37  | 99  | 61  |
| 13 | 27  | 16  | 202 | 29  |
| 5  | 25  | 9   | 402 | 9   |
| 8  | 15  | 21  | 36  | 46  |
| 18 | 5   | 5   | 26  | 21  |
| 13 | 29  | 9   | 155 | 10  |
| 21 | 20  | 7   | 220 | 54  |
| 7  | 12  | 12  | 20  | 67  |
| 26 | 27  | 18  | 119 | 97  |
| 5  | 23  | 3   | 292 | 5   |

|    |     |    |     |    |
|----|-----|----|-----|----|
| 7  | 5   | 2  | 5   | 40 |
| 18 | 42  | 7  | 161 | 0  |
| 16 | 14  | 19 | 53  | 40 |
| 13 | 23  | 52 | 80  | 72 |
| 5  | 22  | 3  | 275 | 5  |
| 6  | 12  | 8  | 16  | 42 |
| 14 | 15  | 15 | 166 | 24 |
| 17 | 49  | 7  | 169 | 8  |
| 1  | 0   | 11 | 0   | 2  |
| 23 | 43  | 4  | 417 | 3  |
| 11 | 37  | 10 | 136 | 19 |
| 8  | 12  | 60 | 27  | 42 |
| 41 | 37  | 11 | 60  | 32 |
| 19 | 21  | 8  | 48  | 15 |
| 1  | 12  | 5  | 108 | 1  |
| 15 | 12  | 17 | 73  | 34 |
| 19 | 10  | 6  | 208 | 17 |
| 4  | 2   | 13 | 62  | 26 |
| 0  | 17  | 37 | 19  | 57 |
| 13 | 29  | 6  | 34  | 18 |
| 3  | 6   | 22 | 61  | 80 |
| 9  | 6   | 11 | 59  | 22 |
| 18 | 6   | 1  | 156 | 3  |
| 4  | 5   | 3  | 2   | 34 |
| 9  | 22  | 11 | 59  | 59 |
| 0  | 10  | 13 | 79  | 40 |
| 3  | 9   | 17 | 117 | 23 |
| 14 | 8   | 30 | 57  | 56 |
| 10 | 10  | 2  | 23  | 48 |
| 0  | 10  | 16 | 75  | 17 |
| 3  | 20  | 0  | 44  | 5  |
| 11 | 2   | 14 | 43  | 66 |
| 4  | 17  | 4  | 109 | 6  |
| 5  | 24  | 12 | 69  | 23 |
| 3  | 13  | 12 | 94  | 11 |
| 7  | 22  | 5  | 103 | 12 |
| 0  | 2   | 0  | 14  | 1  |
| 6  | 22  | 3  | 52  | 16 |
| 71 | 113 | 1  | 38  | 7  |
| 8  | 9   | 6  | 46  | 28 |
| 7  | 13  | 3  | 76  | 9  |
| 15 | 6   | 8  | 78  | 19 |
| 4  | 3   | 1  | 3   | 7  |
| 6  | 14  | 18 | 25  | 47 |
| 3  | 2   | 22 | 29  | 14 |
| 7  | 7   | 9  | 25  | 27 |
| 10 | 9   | 4  | 43  | 42 |
| 13 | 16  | 3  | 56  | 9  |
| 7  | 20  | 2  | 115 | 6  |
| 10 | 9   | 1  | 27  | 27 |
| 1  | 11  | 0  | 75  | 1  |
| 6  | 6   | 9  | 64  | 32 |
| 4  | 7   | 5  | 51  | 2  |
| 4  | 4   | 7  | 20  | 20 |
| 5  | 6   | 3  | 39  | 19 |
| 4  | 4   | 1  | 125 | 2  |
| 1  | 11  | 3  | 123 | 2  |
| 6  | 9   | 6  | 31  | 6  |
| 4  | 2   | 4  | 10  | 4  |

|    |    |    |     |    |
|----|----|----|-----|----|
| 3  | 11 | 7  | 86  | 1  |
| 12 | 31 | 1  | 87  | 0  |
| 5  | 9  | 3  | 26  | 4  |
| 5  | 9  | 3  | 26  | 4  |
| 1  | 3  | 4  | 1   | 27 |
| 13 | 3  | 2  | 26  | 12 |
| 8  | 5  | 2  | 13  | 7  |
| 3  | 2  | 5  | 7   | 10 |
| 7  | 10 | 9  | 47  | 11 |
| 2  | 3  | 6  | 49  | 11 |
| 8  | 3  | 4  | 54  | 3  |
| 12 | 6  | 7  | 30  | 11 |
| 2  | 6  | 7  | 14  | 10 |
| 4  | 9  | 6  | 107 | 6  |
| 4  | 23 | 2  | 10  | 6  |
| 7  | 7  | 8  | 25  | 9  |
| 9  | 7  | 2  | 43  | 6  |
| 2  | 0  | 0  | 30  | 0  |
| 8  | 5  | 5  | 40  | 12 |
| 1  | 9  | 3  | 169 | 4  |
| 0  | 12 | 16 | 15  | 18 |
| 3  | 2  | 5  | 7   | 30 |
| 1  | 9  | 3  | 165 | 4  |
| 0  | 8  | 5  | 22  | 15 |
| 1  | 3  | 3  | 4   | 16 |
| 4  | 1  | 3  | 80  | 7  |
| 5  | 2  | 9  | 27  | 12 |
| 1  | 0  | 0  | 8   | 0  |
| 0  | 5  | 18 | 17  | 17 |
| 5  | 7  | 4  | 7   | 34 |
| 2  | 4  | 3  | 18  | 26 |
| 2  | 3  | 4  | 8   | 10 |
| 1  | 7  | 1  | 19  | 2  |
| 6  | 1  | 0  | 29  | 0  |
| 3  | 3  | 0  | 15  | 17 |
| 3  | 4  | 2  | 71  | 2  |
| 7  | 14 | 4  | 43  | 95 |
| 4  | 3  | 12 | 15  | 15 |
| 0  | 2  | 6  | 69  | 9  |
| 7  | 13 | 1  | 18  | 12 |
| 1  | 2  | 1  | 2   | 27 |
| 2  | 6  | 6  | 30  | 10 |
| 2  | 3  | 0  | 5   | 9  |
| 2  | 6  | 6  | 22  | 10 |
| 3  | 5  | 3  | 18  | 13 |
| 1  | 8  | 2  | 18  | 14 |
| 3  | 4  | 2  | 65  | 2  |
| 3  | 0  | 7  | 7   | 13 |
| 3  | 0  | 0  | 28  | 1  |
| 1  | 5  | 0  | 60  | 3  |
| 4  | 17 | 0  | 21  | 0  |
| 3  | 2  | 2  | 8   | 5  |
| 3  | 3  | 0  | 59  | 0  |
| 0  | 0  | 31 | 39  | 22 |
| 2  | 4  | 3  | 4   | 7  |
| 8  | 11 | 4  | 62  | 3  |
| 9  | 7  | 2  | 14  | 13 |
| 3  | 2  | 2  | 48  | 8  |
| 0  | 1  | 3  | 35  | 4  |



|   |    |    |    |    |
|---|----|----|----|----|
| 1 | 0  | 0  | 6  | 2  |
| 1 | 3  | 8  | 3  | 10 |
| 0 | 8  | 5  | 14 | 19 |
| 0 | 2  | 4  | 14 | 10 |
| 7 | 2  | 11 | 3  | 21 |
| 1 | 9  | 5  | 33 | 3  |
| 0 | 3  | 6  | 27 | 15 |
| 1 | 2  | 2  | 24 | 23 |
| 2 | 2  | 7  | 17 | 17 |
| 1 | 1  | 1  | 14 | 11 |
| 0 | 5  | 3  | 27 | 5  |
| 7 | 10 | 5  | 13 | 7  |
| 2 | 7  | 2  | 45 | 0  |
| 0 | 6  | 0  | 54 | 3  |
| 8 | 2  | 4  | 17 | 6  |
| 6 | 11 | 1  | 25 | 2  |
| 5 | 2  | 2  | 18 | 10 |
| 2 | 3  | 4  | 9  | 1  |
| 2 | 0  | 3  | 17 | 6  |
| 0 | 1  | 3  | 17 | 5  |
| 1 | 5  | 3  | 17 | 6  |
| 4 | 11 | 0  | 57 | 1  |
| 2 | 1  | 5  | 25 | 4  |
| 2 | 1  | 0  | 2  | 3  |
| 2 | 4  | 0  | 17 | 8  |
| 2 | 4  | 1  | 2  | 4  |
| 5 | 3  | 1  | 35 | 4  |
| 2 | 2  | 2  | 11 | 10 |
| 6 | 2  | 0  | 15 | 2  |
| 8 | 3  | 0  | 8  | 15 |
| 0 | 1  | 2  | 9  | 3  |
| 2 | 2  | 1  | 7  | 14 |
| 0 | 0  | 0  | 31 | 0  |
| 4 | 1  | 1  | 17 | 2  |
| 1 | 5  | 0  | 16 | 2  |
| 5 | 4  | 1  | 10 | 2  |
| 3 | 4  | 4  | 25 | 6  |
| 0 | 1  | 9  | 6  | 9  |
| 1 | 2  | 0  | 1  | 0  |
| 1 | 1  | 2  | 13 | 9  |
| 4 | 2  | 7  | 14 | 4  |
| 2 | 2  | 6  | 21 | 16 |
| 2 | 0  | 1  | 10 | 1  |
| 2 | 4  | 4  | 22 | 5  |
| 1 | 4  | 12 | 6  | 5  |
| 2 | 4  | 5  | 13 | 2  |
| 2 | 3  | 2  | 10 | 15 |
| 0 | 0  | 0  | 1  | 0  |
| 2 | 3  | 1  | 23 | 4  |
| 1 | 3  | 2  | 17 | 7  |
| 2 | 2  | 1  | 14 | 3  |
| 1 | 0  | 2  | 18 | 0  |
| 0 | 12 | 1  | 8  | 9  |
| 0 | 1  | 0  | 73 | 0  |
| 0 | 6  | 2  | 8  | 13 |
| 8 | 1  | 2  | 28 | 6  |
| 0 | 1  | 0  | 23 | 2  |
| 1 | 0  | 0  | 14 | 1  |
| 1 | 0  | 0  | 28 | 1  |

|   |   |    |    |    |
|---|---|----|----|----|
| 3 | 6 | 1  | 16 | 2  |
| 2 | 0 | 3  | 26 | 4  |
| 1 | 1 | 2  | 27 | 2  |
| 3 | 4 | 0  | 7  | 5  |
| 3 | 2 | 0  | 10 | 4  |
| 2 | 0 | 3  | 1  | 5  |
| 0 | 3 | 0  | 1  | 1  |
| 0 | 0 | 0  | 27 | 0  |
| 0 | 1 | 1  | 58 | 0  |
| 0 | 2 | 0  | 6  | 6  |
| 1 | 2 | 2  | 10 | 3  |
| 0 | 3 | 0  | 1  | 6  |
| 2 | 0 | 2  | 9  | 1  |
| 1 | 1 | 1  | 11 | 4  |
| 1 | 2 | 6  | 3  | 5  |
| 0 | 1 | 1  | 15 | 0  |
| 1 | 1 | 0  | 0  | 6  |
| 1 | 1 | 1  | 9  | 2  |
| 0 | 1 | 1  | 2  | 10 |
| 1 | 1 | 2  | 8  | 8  |
| 0 | 1 | 3  | 6  | 2  |
| 1 | 2 | 10 | 10 | 1  |
| 1 | 3 | 1  | 9  | 0  |
| 0 | 2 | 0  | 3  | 2  |
| 1 | 1 | 0  | 5  | 10 |
| 2 | 4 | 4  | 3  | 4  |
| 0 | 2 | 1  | 13 | 2  |
| 0 | 0 | 1  | 12 | 0  |
| 0 | 0 | 4  | 8  | 4  |
| 1 | 4 | 0  | 17 | 1  |
| 0 | 0 | 0  | 20 | 1  |
| 0 | 1 | 1  | 4  | 4  |
| 1 | 0 | 0  | 0  | 0  |
| 1 | 0 | 0  | 20 | 2  |
| 3 | 0 | 1  | 2  | 3  |
| 0 | 2 | 1  | 6  | 5  |
| 3 | 4 | 0  | 8  | 2  |
| 0 | 0 | 3  | 8  | 3  |
| 1 | 5 | 0  | 4  | 6  |
| 1 | 0 | 0  | 1  | 2  |
| 0 | 1 | 2  | 8  | 2  |
| 1 | 3 | 3  | 7  | 0  |
| 0 | 4 | 0  | 5  | 0  |
| 0 | 1 | 1  | 12 | 1  |
| 1 | 1 | 1  | 6  | 0  |
| 1 | 2 | 0  | 2  | 3  |
| 2 | 1 | 2  | 7  | 5  |
| 0 | 0 | 1  | 21 | 0  |
| 1 | 0 | 1  | 3  | 6  |
| 0 | 3 | 2  | 0  | 6  |
| 0 | 2 | 0  | 23 | 0  |
| 0 | 0 | 0  | 9  | 1  |
| 0 | 1 | 0  | 1  | 0  |
| 0 | 0 | 2  | 16 | 0  |
| 1 | 0 | 2  | 5  | 3  |
| 0 | 1 | 2  | 6  | 1  |
| 2 | 2 | 1  | 1  | 5  |
| 1 | 0 | 4  | 2  | 0  |
| 0 | 0 | 0  | 10 | 0  |

|   |   |   |    |
|---|---|---|----|
| 1 | 0 | 0 | 1  |
| 1 | 0 | 1 | 2  |
| 0 | 3 | 1 | 1  |
| 0 | 1 | 1 | 4  |
| 0 | 3 | 5 | 3  |
| 1 | 0 | 1 | 1  |
| 1 | 5 | 0 | 0  |
| 0 | 0 | 2 | 1  |
| 1 | 2 | 0 | 1  |
| 2 | 1 | 0 | 4  |
| 1 | 2 | 1 | 1  |
| 0 | 0 | 0 | 0  |
| 0 | 1 | 2 | 0  |
| 1 | 1 | 1 | 3  |
| 1 | 0 | 8 | 8  |
| 1 | 1 | 0 | 4  |
| 0 | 0 | 0 | 2  |
| 0 | 1 | 2 | 0  |
| 1 | 2 | 3 | 0  |
| 0 | 1 | 1 | 1  |
| 0 | 1 | 0 | 1  |
| 0 | 0 | 0 | 0  |
| 0 | 0 | 0 | 0  |
| 0 | 3 | 4 | 2  |
| 0 | 2 | 0 | 0  |
| 0 | 0 | 1 | 3  |
| 0 | 1 | 0 | 0  |
| 0 | 1 | 0 | 0  |
| 1 | 3 | 0 | 7  |
| 1 | 1 | 2 | 2  |
| 1 | 1 | 0 | 4  |
| 0 | 1 | 1 | 0  |
| 1 | 3 | 0 | 0  |
| 0 | 0 | 1 | 13 |
| 0 | 2 | 0 | 1  |
| 0 | 0 | 0 | 0  |
| 0 | 3 | 0 | 1  |
| 0 | 1 | 0 | 0  |
| 1 | 0 | 1 | 0  |
| 1 | 1 | 0 | 2  |
| 0 | 0 | 1 | 1  |
| 0 | 0 | 2 | 3  |
| 0 | 1 | 5 | 4  |
| 0 | 3 | 1 | 1  |
| 0 | 2 | 0 | 0  |
| 0 | 5 | 0 | 0  |
| 0 | 2 | 1 | 0  |
| 0 | 0 | 1 | 0  |
| 0 | 0 | 0 | 1  |
| 0 | 0 | 0 | 0  |
| 0 | 0 | 0 | 3  |
| 1 | 2 | 2 | 1  |
| 0 | 0 | 0 | 0  |
| 0 | 0 | 0 | 1  |
| 0 | 1 | 0 | 1  |
| 2 | 0 | 0 | 0  |
| 0 | 1 | 0 | 1  |
| 0 | 0 | 0 | 0  |
| 0 | 1 | 0 | 0  |

|       |       |       |        |        |
|-------|-------|-------|--------|--------|
| 1     | 0     | 0     | 0      | 1      |
| 2     | 0     | 0     | 7      | 0      |
| 0     | 1     | 0     | 7      | 0      |
| 0     | 1     | 0     | 13     | 0      |
| 1     | 5     | 1     | 3      | 3      |
| 2     | 0     | 2     | 2      | 3      |
| 1     | 0     | 0     | 6      | 0      |
| 0     | 0     | 0     | 4      | 6      |
| 0     | 0     | 0     | 0      | 2      |
| 0     | 0     | 1     | 8      | 0      |
| 1     | 0     | 0     | 3      | 0      |
| 0     | 0     | 0     | 0      | 0      |
| 0     | 1     | 0     | 2      | 3      |
| 2     | 1     | 0     | 0      | 0      |
| 0     | 0     | 1     | 5      | 0      |
| 0     | 0     | 0     | 2      | 2      |
| 0     | 1     | 0     | 4      | 1      |
| 0     | 1     | 1     | 1      | 1      |
| 0     | 0     | 0     | 8      | 0      |
| 0     | 1     | 0     | 6      | 0      |
| 1     | 1     | 0     | 4      | 7      |
| 0     | 0     | 0     | 4      | 0      |
| 0     | 0     | 0     | 3      | 2      |
| 0     | 3     | 1     | 2      | 1      |
| 0     | 0     | 1     | 3      | 1      |
| 0     | 0     | 0     | 1      | 0      |
| 2     | 1     | 0     | 3      | 0      |
| 0     | 2     | 0     | 1      | 1      |
| 2     | 0     | 0     | 0      | 3      |
| 1     | 0     | 0     | 2      | 1      |
| 0     | 1     | 1     | 1      | 5      |
| 0     | 0     | 0     | 4      | 0      |
| 0     | 0     | 0     | 0      | 0      |
| 0     | 1     | 1     | 4      | 0      |
| 0     | 0     | 0     | 2      | 0      |
| 1     | 0     | 2     | 1      | 1      |
| 0     | 0     | 0     | 2      | 3      |
| 0     | 0     | 0     | 2      | 0      |
| 1     | 1     | 3     | 3      | 1      |
| 0     | 0     | 0     | 4      | 0      |
| 0     | 1     | 0     | 8      | 0      |
| 1     | 0     | 2     | 3      | 1      |
| 1     | 0     | 2     | 1      | 0      |
| 0     | 1     | 0     | 2      | 0      |
| 0     | 0     | 2     | 1      | 0      |
| 0     | 0     | 0     | 5      | 1      |
| 0     | 0     | 2     | 1      | 3      |
| 0     | 3     | 0     | 1      | 2      |
| 0     | 1     | 1     | 0      | 0      |
| 0     | 0     | 0     | 0      | 1      |
| 0     | 0     | 0     | 0      | 1      |
| 2     | 0     | 0     | 0      | 1      |
| 19409 | 23372 | 19377 | 80392  | 38053  |
| 55578 | 49516 | 52354 | 107680 | 114166 |
| 442   | 424   | 441   | 343    | 423    |
| UC    | UC    | UC    | UC     | UC     |
| UC    | UC    | UC    | UC     | UC     |

|        |        |        |         |         |
|--------|--------|--------|---------|---------|
| 10     | 11     | 12     | 13      | 14      |
| 10     | 11     | 12     | 13      | 14      |
| UC     | UC     | UC     | UC      | UC      |
| C_41   | C_42   | C_44   | C_46    | C_47    |
| 623719 | 774447 | 627333 | 2772220 | 1217409 |
| UC     | UC     | UC     | UC      | UC      |
| 15.83  | 11.24  | 13.86  | 6.82    | 16.32   |
| 2.63   | 4.26   | 0.50   | 1.31    | 1.40    |
| 1.21   | 1.63   | 6.11   | 1.56    | 2.74    |
| 1.92   | 1.58   | 2.12   | 2.00    | 2.23    |
| 0.68   | 1.26   | 2.41   | 1.94    | 2.96    |
| 1.06   | 1.62   | 0.15   | 2.99    | 0.24    |
| 0.80   | 1.87   | 0.54   | 2.15    | 0.47    |
| 0.33   | 0.51   | 0.05   | 1.71    | 0.05    |
| 0.42   | 0.60   | 0.24   | 1.44    | 0.15    |
| 1.27   | 0.78   | 0.32   | 0.80    | 0.44    |
| 0.49   | 0.21   | 0.52   | 0.98    | 0.18    |
| 0.33   | 0.45   | 0.42   | 0.49    | 0.46    |
| 0.30   | 0.20   | 0.34   | 0.79    | 0.14    |
| 0.43   | 0.23   | 0.42   | 0.31    | 0.74    |
| 0.26   | 0.27   | 0.24   | 1.07    | 0.04    |
| 0.12   | 0.17   | 0.66   | 0.22    | 0.34    |
| 0.10   | 0.16   | 0.05   | 0.70    | 0.03    |
| 0.15   | 0.13   | 0.14   | 0.33    | 0.12    |
| 0.24   | 0.34   | 0.09   | 0.47    | 0.08    |
| 0.21   | 0.34   | 0.15   | 0.20    | 0.13    |
| 0.12   | 0.11   | 0.15   | 0.29    | 0.13    |
| 0.17   | 0.09   | 0.08   | 0.21    | 0.13    |
| 0.06   | 0.13   | 0.06   | 0.33    | 0.03    |
| 0.06   | 0.28   | 0.02   | 0.20    | 0.04    |
| 0.27   | 0.80   | 0.04   | 0.18    | 0.02    |
| 0.08   | 0.10   | 0.07   | 0.10    | 0.10    |
| 0.09   | 0.04   | 0.15   | 0.07    | 0.17    |
| 0.22   | 0.28   | 0.02   | 0.10    | 0.03    |
| 0.10   | 0.19   | 0.06   | 0.12    | 0.05    |
| 0.07   | 0.13   | 0.05   | 0.11    | 0.05    |
| 0.07   | 0.10   | 0.08   | 0.20    | 0.04    |
| 0.07   | 0.08   | 0.17   | 0.10    | 0.15    |
| 0.02   | 0.05   | 0.03   | 0.28    | 0.02    |
| 0.03   | 0.04   | 0.01   | 0.96    | 0.01    |
| 0.09   | 0.17   | 0.05   | 0.11    | 0.05    |
| 0.22   | 0.07   | 0.03   | 0.09    | 0.12    |
| 0.22   | 0.36   | 0.05   | 0.14    | 0.05    |
| 0.15   | 0.45   | 0.03   | 0.10    | 0.04    |
| 0.05   | 0.15   | 0.03   | 0.06    | 0.13    |
| 0.02   | 0.05   | 0.62   | 0.03    | 0.15    |
| 0.05   | 0.06   | 0.03   | 0.08    | 0.09    |
| 0.02   | 0.04   | 0.14   | 0.06    | 0.09    |
| 0.06   | 0.07   | 0.04   | 0.04    | 0.07    |
| 0.08   | 0.09   | 0.01   | 0.12    | 0.01    |
| 0.11   | 0.09   | 0.04   | 0.06    | 0.04    |
| 0.02   | 0.04   | 0.05   | 0.06    | 0.03    |
| 0.02   | 0.07   | 0.02   | 0.06    | 0.02    |
| 0.01   | 0.02   | 0.14   | 0.04    | 0.06    |
| 0.00   | 0.00   | 0.00   | 0.02    | 0.00    |
| 0.01   | 0.05   | 0.02   | 0.18    | 0.01    |
| 0.03   | 0.03   | 0.01   | 0.00    | 0.04    |
| 0.02   | 0.05   | 0.01   | 0.12    | 0.01    |

|      |      |      |      |      |
|------|------|------|------|------|
| 0.04 | 0.02 | 0.01 | 0.04 | 0.03 |
| 0.01 | 0.05 | 0.03 | 0.06 | 0.02 |
| 0.01 | 0.03 | 0.02 | 0.04 | 0.01 |
| 0.00 | 0.00 | 0.00 | 0.03 | 0.00 |
| 0.03 | 0.03 | 0.01 | 0.04 | 0.02 |
| 0.01 | 0.02 | 0.02 | 0.06 | 0.02 |
| 0.02 | 0.03 | 0.04 | 0.03 | 0.02 |
| 0.01 | 0.05 | 0.05 | 0.02 | 0.03 |
| 0.02 | 0.02 | 0.01 | 0.06 | 0.02 |
| 0.02 | 0.02 | 0.02 | 0.05 | 0.02 |
| 0.01 | 0.03 | 0.00 | 0.03 | 0.00 |
| 0.00 | 0.00 | 0.00 | 0.01 | 0.00 |
| 0.03 | 0.01 | 0.06 | 0.01 | 0.04 |
| 0.02 | 0.02 | 0.00 | 0.03 | 0.01 |
| 0.02 | 0.01 | 0.01 | 0.06 | 0.00 |
| 0.01 | 0.01 | 0.00 | 0.03 | 0.00 |
| 0.01 | 0.01 | 0.00 | 0.04 | 0.01 |
| 0.06 | 0.06 | 0.00 | 0.01 | 0.01 |
| 0.01 | 0.02 | 0.02 | 0.02 | 0.02 |
| 0.01 | 0.01 | 0.03 | 0.01 | 0.04 |
| 0.01 | 0.01 | 0.00 | 0.05 | 0.00 |
| 0.02 | 0.01 | 0.01 | 0.02 | 0.01 |
| 0.00 | 0.01 | 0.00 | 0.02 | 0.00 |
| 0.01 | 0.01 | 0.01 | 0.00 | 0.02 |
| 0.01 | 0.02 | 0.01 | 0.01 | 0.01 |
| 0.02 | 0.04 | 0.01 | 0.00 | 0.01 |
| 0.00 | 0.01 | 0.04 | 0.01 | 0.02 |
| 0.02 | 0.03 | 0.00 | 0.03 | 0.01 |
| 0.01 | 0.01 | 0.00 | 0.01 | 0.01 |
| 0.01 | 0.01 | 0.02 | 0.01 | 0.02 |
| 0.02 | 0.02 | 0.02 | 0.01 | 0.02 |
| 0.01 | 0.00 | 0.00 | 0.09 | 0.00 |
| 0.00 | 0.01 | 0.00 | 0.02 | 0.00 |
| 0.00 | 0.01 | 0.01 | 0.01 | 0.01 |
| 0.01 | 0.01 | 0.02 | 0.01 | 0.02 |
| 0.00 | 0.01 | 0.00 | 0.02 | 0.00 |
| 0.01 | 0.01 | 0.01 | 0.02 | 0.00 |
| 0.00 | 0.01 | 0.02 | 0.01 | 0.01 |
| 0.01 | 0.01 | 0.01 | 0.01 | 0.01 |
| 0.00 | 0.00 | 0.00 | 0.00 | 0.00 |
| 0.00 | 0.00 | 0.01 | 0.01 | 0.00 |
| 0.00 | 0.01 | 0.00 | 0.01 | 0.00 |
| 0.00 | 0.00 | 0.00 | 0.02 | 0.00 |
| 0.00 | 0.01 | 0.01 | 0.02 | 0.00 |
| 0.00 | 0.00 | 0.01 | 0.01 | 0.01 |
| 0.00 | 0.00 | 0.01 | 0.01 | 0.01 |
| 0.00 | 0.01 | 0.01 | 0.00 | 0.01 |
| 0.01 | 0.00 | 0.00 | 0.02 | 0.00 |
| 0.01 | 0.00 | 0.00 | 0.01 | 0.01 |
| 0.00 | 0.00 | 0.00 | 0.01 | 0.00 |
| 0.00 | 0.01 | 0.02 | 0.01 | 0.01 |
| 0.01 | 0.03 | 0.00 | 0.00 | 0.00 |
| 0.01 | 0.01 | 0.00 | 0.01 | 0.00 |
| 0.00 | 0.00 | 0.00 | 0.01 | 0.00 |
| 0.00 | 0.00 | 0.00 | 0.01 | 0.00 |
| 0.01 | 0.01 | 0.00 | 0.01 | 0.00 |
| 0.00 | 0.00 | 0.00 | 0.02 | 0.00 |
| 0.01 | 0.00 | 0.00 | 0.01 | 0.00 |
| 0.00 | 0.01 | 0.00 | 0.01 | 0.00 |









|       |       |       |       |       |
|-------|-------|-------|-------|-------|
| -0.35 | 0.02  | -0.70 | 1.69  | -0.88 |
| 1.31  | 0.04  | -1.13 | 0.10  | -0.82 |
| 0.07  | -0.98 | 0.17  | 1.92  | -1.09 |
| -1.48 | -0.41 | -0.62 | 0.02  | -0.26 |
| -0.32 | -0.92 | -0.13 | 2.52  | -1.23 |
| -0.23 | -1.34 | -0.25 | -0.88 | 1.60  |
| 0.20  | 0.23  | 0.08  | 3.89  | -0.85 |
| -0.77 | -0.54 | 1.58  | -0.34 | 0.20  |
| -0.38 | 0.01  | -0.69 | 3.45  | -0.82 |
| -0.64 | -0.83 | -0.68 | 1.13  | -0.92 |
| 0.51  | 1.40  | -0.81 | 2.54  | -0.92 |
| -0.17 | 1.11  | -0.82 | -0.26 | -1.04 |
| -0.60 | -0.84 | -0.14 | 2.12  | -0.42 |
| 0.26  | -0.93 | -1.03 | 0.95  | -0.38 |
| -0.72 | 0.10  | -0.69 | 2.66  | -1.14 |
| -0.59 | 1.52  | -0.97 | 0.75  | -0.78 |
| 0.81  | 3.99  | -0.56 | 0.27  | -0.63 |
| -0.61 | -0.21 | -0.89 | -0.37 | -0.34 |
| -0.77 | -1.49 | 0.13  | -1.08 | 0.48  |
| 1.05  | 1.63  | -0.90 | -0.11 | -0.82 |
| -0.13 | 1.55  | -1.02 | 0.20  | -1.05 |
| -0.75 | 0.67  | -1.22 | 0.15  | -1.16 |
| -0.57 | 0.31  | -0.23 | 2.45  | -1.11 |
| -1.10 | -0.72 | 0.89  | -0.36 | 0.57  |
| -0.58 | -0.16 | -0.51 | 3.39  | -0.59 |
| -0.26 | -0.18 | -0.32 | 4.83  | -0.34 |
| -0.07 | 1.75  | -0.98 | 0.35  | -0.98 |
| 0.44  | -0.43 | -0.72 | -0.30 | -0.14 |
| 1.26  | 2.90  | -0.74 | 0.28  | -0.71 |
| 0.64  | 3.69  | -0.67 | 0.05  | -0.58 |
| -0.62 | 0.66  | -0.84 | -0.52 | 0.37  |
| -0.65 | -0.42 | 4.21  | -0.53 | 0.39  |
| -0.46 | -0.38 | -0.84 | -0.01 | 0.25  |
| -1.31 | -0.92 | 2.09  | -0.13 | 0.77  |
| -0.04 | 0.18  | -1.14 | -0.87 | 0.19  |
| 1.07  | 1.19  | -0.72 | 1.93  | -0.73 |
| 1.01  | 0.50  | -0.39 | -0.10 | -0.53 |
| -1.64 | -0.47 | 0.20  | 0.88  | -1.51 |
| -0.82 | 1.17  | -1.04 | 0.87  | -0.98 |
| -1.23 | -1.04 | 2.97  | -0.45 | 0.26  |
| -0.28 | -0.30 | -0.27 | 0.28  | -0.31 |
| -0.42 | 0.48  | -0.32 | 3.41  | -0.50 |
| -0.33 | -0.49 | -1.56 | -1.76 | 0.41  |
| -0.39 | 0.41  | -0.66 | 2.51  | -0.67 |
| 0.17  | -1.24 | -2.15 | 0.09  | -0.53 |
| -0.81 | 1.28  | 0.01  | 1.70  | -0.45 |
| -0.82 | 0.16  | -0.39 | 0.73  | -0.89 |

|       |       |       |       |       |
|-------|-------|-------|-------|-------|
| -0.23 | -0.21 | -0.33 | 0.81  | -0.34 |
| -0.20 | 0.29  | -1.51 | 0.92  | -1.00 |
| -1.47 | 0.04  | 0.05  | 2.83  | -0.52 |
| -0.63 | -0.39 | 0.37  | 0.30  | -0.73 |
| -0.75 | 0.22  | 0.34  | -0.47 | -0.28 |
| -0.55 | -0.30 | -0.94 | 3.07  | -0.68 |
| -0.45 | 0.18  | 0.09  | 2.44  | -0.22 |
| 0.18  | 1.28  | -0.60 | 1.97  | -0.59 |
| -0.22 | -0.16 | -0.28 | 0.10  | -0.25 |
| 0.03  | -0.98 | 1.69  | -1.19 | 0.59  |
| 0.48  | 0.08  | -1.29 | 1.55  | -0.96 |
| 0.46  | -0.11 | -0.47 | 3.84  | -0.66 |
| -0.23 | -0.26 | -0.83 | 1.81  | -0.77 |
| -0.09 | -0.03 | -0.96 | 3.38  | -0.73 |
| 0.41  | 0.32  | -0.40 | -0.36 | -0.29 |
| -0.60 | -0.34 | -0.40 | -0.14 | -0.45 |
| -0.69 | -0.98 | 0.73  | -1.18 | 1.84  |
| -0.22 | 0.18  | -0.56 | 3.58  | -0.77 |
| 1.18  | 0.10  | -0.87 | 0.81  | -0.96 |
| -0.90 | 0.15  | -0.87 | 0.89  | -0.94 |
| -0.70 | -0.74 | -0.74 | -1.19 | 0.34  |
| -0.03 | 0.84  | -0.82 | -0.43 | -0.66 |
| -0.10 | 0.49  | -0.41 | -0.43 | -0.19 |
| -1.21 | -0.98 | 1.97  | -0.38 | 0.36  |
| 0.17  | 1.04  | -1.08 | 1.46  | -0.46 |
| -0.28 | 0.74  | -1.29 | 0.27  | -0.96 |
| -0.93 | -0.37 | 0.50  | 0.10  | 1.12  |
| -0.11 | 0.42  | -0.11 | -0.93 | 0.52  |
| -0.18 | -0.46 | -0.44 | 3.85  | -0.44 |
| -0.49 | 0.90  | -1.03 | 2.19  | -1.02 |
| -1.05 | -0.63 | -0.57 | 0.84  | 0.29  |
| -1.15 | -0.32 | 0.75  | -1.36 | 0.66  |
| -0.30 | 0.61  | -0.72 | 2.36  | -0.75 |
| 0.05  | 0.73  | -0.47 | 2.44  | -1.60 |
| -1.03 | 0.12  | 0.88  | -0.64 | 0.17  |
| -0.45 | -0.50 | 0.70  | -0.40 | 0.25  |
| -0.19 | -0.29 | -0.31 | 0.13  | -0.24 |
| -1.20 | -0.86 | 1.37  | 0.40  | -0.46 |
| -0.65 | -0.11 | -0.76 | 0.74  | -0.89 |
| -0.13 | -0.04 | -0.50 | 3.99  | -0.51 |
| -0.73 | 0.54  | -0.10 | 3.20  | -0.81 |
| -1.16 | -0.71 | 0.50  | -0.51 | 0.18  |
| -1.09 | -1.32 | -0.10 | -0.40 | 0.69  |
| -1.14 | 0.08  | -0.45 | -1.03 | 0.04  |
| 0.65  | 0.26  | -0.68 | 3.65  | -0.62 |
| -0.14 | -0.59 | -0.95 | -0.08 | 0.11  |
| -1.20 | -0.03 | -1.43 | 1.17  | -0.90 |
| -0.68 | -0.54 | 2.99  | -0.39 | 0.06  |

|       |       |       |       |       |
|-------|-------|-------|-------|-------|
| -0.03 | 1.44  | -0.46 | -0.33 | -0.52 |
| 0.90  | 0.17  | -1.22 | 2.42  | -0.90 |
| -0.50 | -0.19 | -0.64 | 2.94  | -0.77 |
| -0.78 | -0.54 | -0.42 | 0.65  | -0.31 |
| -0.21 | 0.14  | -0.76 | 0.10  | -0.66 |
| 0.15  | -0.49 | -0.95 | 3.79  | -0.92 |
| 0.96  | -0.13 | -1.13 | 1.87  | -0.87 |
| -0.84 | 0.90  | -0.28 | 1.90  | -0.64 |
| -1.36 | -0.64 | -0.03 | -0.82 | -0.03 |
| -0.92 | -0.71 | -0.88 | 1.49  | 0.50  |
| 0.25  | 0.86  | -1.20 | 0.32  | -0.91 |
| -0.84 | 0.28  | 0.64  | -0.20 | -0.23 |
| -1.00 | -1.11 | 1.17  | -0.27 | -0.49 |
| -1.41 | 0.21  | -0.32 | 1.06  | 1.66  |
| -0.85 | 0.00  | -0.78 | 2.25  | -1.02 |
| -0.85 | 0.00  | -0.78 | 2.25  | -1.02 |
| 0.04  | 0.21  | -0.78 | 0.02  | 0.37  |
| 0.13  | -0.69 | -0.69 | 0.22  | -0.23 |
| 0.27  | -0.59 | 0.78  | 1.88  | 1.28  |
| -0.68 | -0.08 | -0.85 | -0.71 | -0.50 |
| -0.82 | 0.11  | -0.40 | 2.24  | -0.41 |
| -0.34 | -0.33 | -0.32 | 1.68  | -0.37 |
| -0.46 | -1.02 | 0.63  | 0.71  | -0.38 |
| 0.19  | 0.94  | -0.80 | -0.77 | -0.77 |
| -1.20 | -1.17 | -0.11 | 1.27  | 0.43  |
| -0.47 | 0.12  | -1.03 | -0.56 | 0.98  |
| -0.71 | -0.63 | -0.01 | -0.44 | 0.18  |
| 0.04  | -0.76 | -0.65 | -0.56 | -0.22 |
| -1.32 | -0.95 | 0.86  | 2.27  | -0.78 |
| -0.80 | 2.66  | -1.06 | 0.93  | -0.60 |
| 0.30  | -0.62 | -0.95 | 0.59  | -0.28 |
| -0.62 | -0.47 | -0.62 | 3.76  | -0.65 |
| 0.06  | 0.61  | -0.61 | 1.09  | -0.26 |

---

|                        |                        |               |              |              |
|------------------------|------------------------|---------------|--------------|--------------|
| 7                      | 8                      | 9             | 10           | 11           |
| 8                      | 9                      | 10            | 11           | 12           |
| TTCAAGTAATCCAGGATAGGCT | AAACCGTTACCATTACTGAGTT | AAGCTGCCAGTTC | CATTGCACTTGT | TGAGGTAGTAGT |
| miR-26a-5p             | miR-451a               | miR-22-3p     | miR-25-3p    | let-7i-5p    |
| 5953261                | 3762724                | 3462453       | 3413660      | 2186845      |
| -1.13                  | -0.50                  | -0.38         | 1.16         | 1.45         |
| -0.25                  | -0.26                  | -0.94         | 0.27         | -0.89        |
| 0.00                   | 0.10                   | 1.75          | 2.58         | 0.90         |
| -0.93                  | -0.40                  | 0.03          | 1.36         | 1.29         |
| 2.65                   | -0.49                  | -1.00         | -0.92        | -0.75        |
| 0.47                   | -0.60                  | -0.66         | -0.22        | 2.33         |
| -0.62                  | -0.58                  | -0.75         | -0.99        | 1.19         |
| -0.99                  | -0.56                  | -0.89         | -1.07        | -0.93        |
| -0.79                  | -0.23                  | -0.03         | 0.96         | -0.55        |
| -0.58                  | -0.03                  | -0.35         | 1.31         | 0.07         |
| 1.13                   | 0.30                   | 0.02          | 0.04         | -0.98        |
| -0.99                  | -0.54                  | -0.70         | -1.13        | 0.17         |
| 1.56                   | 2.47                   | 1.69          | 0.10         | 1.92         |
| -1.11                  | -0.53                  | -0.88         | -0.82        | -1.09        |
| -0.63                  | -0.08                  | 0.78          | 0.75         | -0.14        |
| 0.67                   | 0.07                   | 2.19          | -0.18        | 0.07         |
| 0.13                   | -0.52                  | -0.47         | -0.68        | -0.50        |
| -0.49                  | 0.68                   | 1.23          | 0.77         | -0.25        |
| 0.28                   | 0.02                   | -0.17         | 0.59         | -0.64        |
| 1.35                   | 3.77                   | 1.54          | -0.34        | -0.75        |

|       |       |       |       |       |
|-------|-------|-------|-------|-------|
| -0.72 | -0.51 | -0.32 | 0.24  | 1.39  |
| -0.32 | -0.56 | -0.77 | -1.04 | -0.65 |
| -0.47 | -0.47 | -0.60 | -1.05 | -0.30 |
| -1.09 | -0.54 | -0.70 | -1.29 | -0.51 |
| 0.34  | -0.52 | -1.02 | -1.05 | -1.42 |
| 1.32  | -0.49 | -0.24 | -0.41 | -0.36 |
| 1.21  | 0.97  | 1.65  | 1.07  | -0.07 |
| 0.90  | 5.14  | 2.15  | 1.12  | 0.27  |
| 0.95  | -0.37 | -0.08 | 1.07  | 0.10  |
| -0.88 | -0.14 | -0.41 | 1.73  | 0.12  |
| -1.42 | -0.53 | -0.94 | 1.03  | 0.76  |
| -0.20 | 0.53  | -0.57 | 3.37  | 0.97  |
| 3.89  | 0.31  | -0.83 | 0.17  | -0.85 |
| -0.71 | -0.47 | -0.67 | -0.15 | -0.58 |
| -1.02 | 0.14  | -0.71 | 0.94  | -0.29 |
| -0.19 | -0.52 | -0.72 | -0.23 | -0.44 |
| -1.64 | -0.60 | -1.04 | -1.41 | -0.94 |
| 0.45  | 0.00  | -0.37 | 2.16  | 3.02  |
| 0.57  | 10.00 | 0.49  | 3.03  | 2.96  |
| 0.75  | -0.41 | -0.49 | -1.00 | -1.02 |
| -0.21 | -0.41 | -0.78 | -1.21 | 2.41  |
| 0.12  | 0.15  | -0.25 | -1.40 | 11.30 |
| -0.25 | -0.55 | -0.55 | -0.82 | -0.23 |
| 0.63  | 0.38  | 0.53  | 1.96  | 1.88  |
| -0.83 | -0.51 | -0.49 | -0.90 | -1.29 |
| -0.51 | -0.51 | -0.78 | -1.61 | 0.47  |
| 3.42  | -0.04 | 0.93  | -0.45 | -0.81 |
| 0.48  | -0.46 | -0.12 | -0.85 | -0.60 |
| 0.12  | 0.28  | 1.04  | -0.73 | -0.72 |
| 0.64  | -0.29 | 0.06  | -0.88 | -0.87 |
| 0.60  | 0.11  | 1.55  | -0.61 | -0.49 |
| -0.04 | -0.55 | -0.64 | -0.86 | 0.00  |
| -0.56 | -0.53 | -0.61 | -0.55 | 0.22  |
| 1.23  | -0.42 | 0.51  | -0.73 | 0.48  |
| -0.46 | -0.57 | -0.48 | -0.69 | -0.06 |
| -0.32 | -0.55 | -0.56 | -0.73 | -0.74 |
| -0.11 | -0.50 | 0.43  | -0.26 | 0.94  |
| 1.57  | 6.18  | 2.70  | 0.10  | 0.26  |
| 0.56  | -0.52 | -0.20 | -0.27 | -0.56 |
| 2.77  | -0.19 | 0.08  | -0.41 | 0.22  |
| 3.06  | -0.08 | -0.48 | -0.88 | -0.76 |
| 1.56  | 4.07  | 2.45  | 0.80  | 0.09  |
| -0.32 | -0.45 | -0.65 | -0.70 | -0.92 |
| 1.20  | -0.41 | -0.10 | -0.60 | 0.66  |
| 1.23  | 0.00  | 2.74  | 0.61  | 0.58  |
| -1.35 | -0.09 | -0.41 | 2.79  | 6.00  |
| -0.74 | 1.39  | 3.23  | 7.24  | 2.28  |
| -0.60 | -0.36 | -0.96 | 3.69  | 1.32  |
| -0.40 | -0.28 | -0.62 | 1.97  | 2.35  |
| 1.01  | -0.15 | 0.07  | 1.63  | 1.34  |
| -0.65 | -0.45 | -0.29 | 0.99  | 1.24  |
| 0.38  | -0.15 | -0.89 | 0.07  | 2.54  |
| -0.20 | -0.20 | 0.38  | 1.55  | 1.56  |
| 0.25  | 1.13  | 0.67  | -0.11 | 0.06  |
| -1.54 | -0.37 | -0.92 | -1.57 | 1.47  |
| -0.20 | -0.19 | 1.58  | -0.42 | 1.23  |
| 0.27  | -0.01 | -0.43 | 0.93  | -0.49 |
| -0.27 | -0.51 | -0.31 | 0.96  | -0.28 |
| 0.87  | 1.56  | 1.09  | 0.72  | 0.44  |

|       |       |       |       |       |
|-------|-------|-------|-------|-------|
| 2.86  | 0.25  | 1.73  | -0.20 | -0.71 |
| 0.71  | -0.39 | -0.20 | -0.61 | -1.18 |
| 1.99  | -0.17 | 0.43  | 0.00  | -0.03 |
| -0.11 | -0.47 | -0.39 | -1.62 | -0.97 |
| 1.73  | 7.12  | 1.80  | -0.35 | -0.08 |
| 0.68  | 8.65  | 1.25  | 0.14  | -0.12 |
| 1.24  | 0.18  | 0.20  | -0.72 | -1.08 |
| 2.17  | -0.35 | 0.53  | -0.75 | -0.44 |
| 1.26  | -0.45 | -0.02 | -0.30 | 0.13  |
| 0.38  | 0.49  | 0.74  | 0.50  | -0.15 |
| 0.78  | -0.37 | 0.33  | -0.47 | -0.73 |
| 0.17  | 0.60  | 0.04  | 1.16  | 1.26  |
| -0.80 | -0.56 | -0.71 | 0.14  | 0.58  |
| -0.43 | -0.55 | -0.44 | -0.69 | -0.27 |
| 1.11  | -0.31 | 0.40  | 0.58  | -0.07 |
| 1.04  | -0.14 | 0.47  | 3.33  | 2.97  |
| -1    | 0     | -1    | 0     | -1    |
| 0.00  | 0.00  | 0.00  | 0.00  | 0.00  |
| 1.00  | 1.00  | 1.00  | 1.00  | 1.00  |
| 0.77  | 0.88  | 0.38  | 0.11  | 0.67  |

| 7                      | 8                      | 9             | 10           | 11           |
|------------------------|------------------------|---------------|--------------|--------------|
| TTCAAGTAATCCAGGATAGGCT | AAACCGTTACCATTACTGAGTT | AAGCTGCCAGTTC | CATTGCACTTGT | TGAGGTAGTAGT |
| miR-26a-5p             | miR-451a               | miR-22-3p     | miR-25-3p    | let-7i-5p    |
| 5953261                | 3762724                | 3462453       | 3413660      | 2186845      |
| -1.13                  | -0.50                  | -0.38         | 1.16         | 1.45         |
| -0.25                  | -0.26                  | -0.94         | 0.27         | -0.89        |
| 0.00                   | 0.10                   | 1.75          | 2.58         | 0.90         |
| -0.93                  | -0.40                  | 0.03          | 1.36         | 1.29         |
| 2.65                   | -0.49                  | -1.00         | -0.92        | -0.75        |
| 0.47                   | -0.60                  | -0.66         | -0.22        | 2.33         |
| -0.62                  | -0.58                  | -0.75         | -0.99        | 1.19         |
| -0.99                  | -0.56                  | -0.89         | -1.07        | -0.93        |
| -0.79                  | -0.23                  | -0.03         | 0.96         | -0.55        |
| -0.58                  | -0.03                  | -0.35         | 1.31         | 0.07         |
| 1.13                   | 0.30                   | 0.02          | 0.04         | -0.98        |
| -0.99                  | -0.54                  | -0.70         | -1.13        | 0.17         |
| 1.56                   | 2.47                   | 1.69          | 0.10         | 1.92         |
| -1.11                  | -0.53                  | -0.88         | -0.82        | -1.09        |
| -0.63                  | -0.08                  | 0.78          | 0.75         | -0.14        |
| 0.67                   | 0.07                   | 2.19          | -0.18        | 0.07         |
| 0.13                   | -0.52                  | -0.47         | -0.68        | -0.50        |
| -0.49                  | 0.68                   | 1.23          | 0.77         | -0.25        |
| 0.28                   | 0.02                   | -0.17         | 0.59         | -0.64        |
| 1.35                   | 3.77                   | 1.54          | -0.34        | -0.75        |
| -0.72                  | -0.51                  | -0.32         | 0.24         | 1.39         |
| -0.32                  | -0.56                  | -0.77         | -1.04        | -0.65        |
| -0.47                  | -0.47                  | -0.60         | -1.05        | -0.30        |
| -1.09                  | -0.54                  | -0.70         | -1.29        | -0.51        |
| 0.34                   | -0.52                  | -1.02         | -1.05        | -1.42        |
| 1.32                   | -0.49                  | -0.24         | -0.41        | -0.36        |
| 1.21                   | 0.97                   | 1.65          | 1.07         | -0.07        |
| 0.90                   | 5.14                   | 2.15          | 1.12         | 0.27         |

|       |       |       |       |       |
|-------|-------|-------|-------|-------|
| 0.95  | -0.37 | -0.08 | 1.07  | 0.10  |
| -0.88 | -0.14 | -0.41 | 1.73  | 0.12  |
| -1.42 | -0.53 | -0.94 | 1.03  | 0.76  |
| -0.20 | 0.53  | -0.57 | 3.37  | 0.97  |
| 3.89  | 0.31  | -0.83 | 0.17  | -0.85 |
| -0.71 | -0.47 | -0.67 | -0.15 | -0.58 |
| -1.02 | 0.14  | -0.71 | 0.94  | -0.29 |
| -0.19 | -0.52 | -0.72 | -0.23 | -0.44 |
| -1.64 | 0.60  | 1.04  | 1.41  | 0.84  |

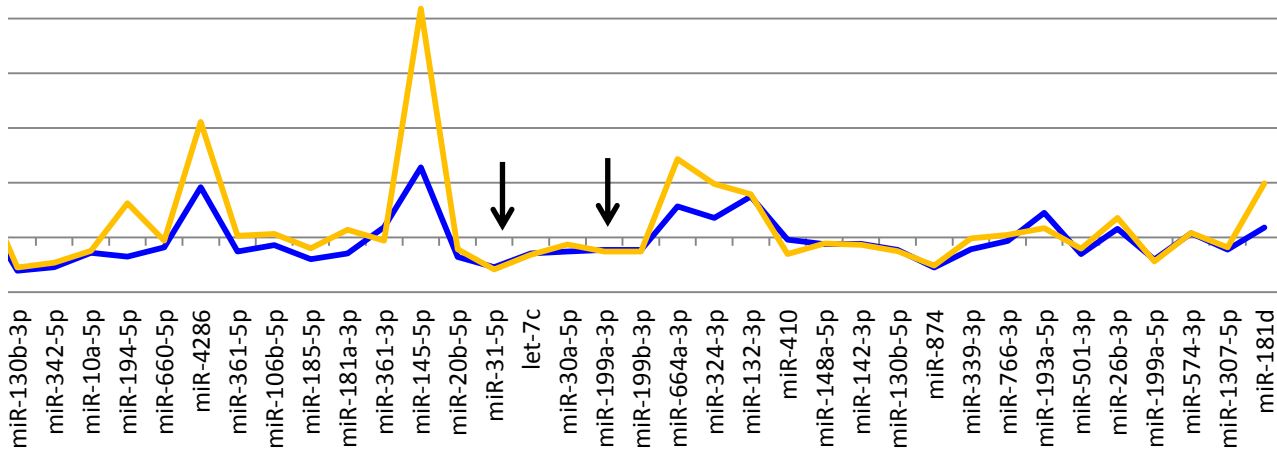

|       |       |       |       |       |
|-------|-------|-------|-------|-------|
| 0.48  | 0.57  | 0.48  | 0.85  | 0.88  |
| -0.32 | -0.55 | -0.56 | -0.73 | -0.74 |
| -0.11 | -0.50 | 0.43  | -0.26 | 0.94  |
| 1.57  | 6.18  | 2.70  | 0.10  | 0.26  |
| 0.56  | -0.52 | -0.20 | -0.27 | -0.56 |
| 2.77  | -0.19 | 0.08  | -0.41 | 0.22  |
| 3.06  | -0.08 | -0.48 | -0.88 | -0.76 |
| 1.56  | 4.07  | 2.45  | 0.80  | 0.09  |
| -0.32 | -0.45 | -0.65 | -0.70 | -0.92 |
| 1.20  | -0.41 | -0.10 | -0.60 | 0.66  |
| 1.23  | 0.00  | 2.74  | 0.61  | 0.58  |
| -1.35 | -0.09 | -0.41 | 2.79  | 6.00  |
| -0.74 | 1.39  | 3.23  | 7.24  | 2.28  |
| -0.60 | -0.36 | -0.96 | 3.69  | 1.32  |
| -0.40 | -0.28 | -0.62 | 1.97  | 2.35  |
| 1.01  | -0.15 | 0.07  | 1.63  | 1.34  |
| -0.65 | -0.45 | -0.29 | 0.99  | 1.24  |
| 0.38  | -0.15 | -0.89 | 0.07  | 2.54  |
| -0.20 | -0.20 | 0.38  | 1.55  | 1.56  |
| 0.25  | 1.13  | 0.67  | -0.11 | 0.06  |
| -1.54 | -0.37 | -0.92 | -1.57 | 1.47  |
| -0.20 | -0.19 | 1.58  | -0.42 | 1.23  |
| 0.27  | -0.01 | -0.43 | 0.93  | -0.49 |
| -0.27 | -0.51 | -0.31 | 0.96  | -0.28 |
| 0.87  | 1.56  | 1.09  | 0.72  | 0.44  |
| 2.86  | 0.25  | 1.73  | -0.20 | -0.71 |
| 0.71  | -0.39 | -0.20 | -0.61 | -1.18 |
| 1.99  | -0.17 | 0.43  | 0.00  | -0.03 |
| -0.11 | -0.47 | -0.39 | -1.62 | -0.97 |
| 1.73  | 7.12  | 1.80  | -0.35 | -0.08 |
| 0.68  | 8.65  | 1.25  | 0.14  | -0.12 |
| 1.24  | 0.18  | 0.20  | -0.72 | -1.08 |
| 2.17  | -0.35 | 0.53  | -0.75 | -0.44 |

|       |       |       |       |       |
|-------|-------|-------|-------|-------|
| 1.26  | -0.45 | -0.02 | -0.30 | 0.13  |
| 0.38  | 0.49  | 0.74  | 0.50  | -0.15 |
| 0.78  | -0.37 | 0.33  | -0.47 | -0.73 |
| 0.17  | 0.60  | 0.04  | 1.16  | 1.26  |
| -0.80 | -0.56 | -0.71 | 0.14  | 0.58  |
| -0.43 | -0.55 | -0.44 | -0.69 | -0.27 |
| 1.11  | -0.31 | 0.40  | 0.58  | -0.07 |
| 1     | 0     | 0     | 3     | 3     |

---

| 7                      | 8                      | 9             | 10            | 11           |
|------------------------|------------------------|---------------|---------------|--------------|
| 74                     | 124                    | 49            | 21            | 60           |
| CATGCCTTGAGTGTAGGACCGT | AAAGTTCTGAGACACTCCGACT | GGATATCATCATF | ACTGGACTTGGAC | TCCCTGAGACCC |
| miR-532-5p             | miR-148a-5p            | miR-144-5p    | miR-378a-3p   | miR-125a-5p  |
| 68018                  | 13673                  | 178962        | 738230        | 115160       |
| 0.47                   | -0.12                  | -0.29         | 0.38          | -0.59        |
| -0.58                  | -0.50                  | -0.29         | -1.59         | 2.00         |
| 0.97                   | 0.06                   | 0.02          | -0.62         | -0.45        |
| 0.55                   | -0.29                  | 0.23          | -0.58         | -0.58        |
| -1.82                  | -0.34                  | -0.33         | 0.66          | 2.75         |
| -0.91                  | -0.69                  | -0.16         | -0.55         | -0.48        |
| -0.54                  | -0.70                  | -0.21         | 0.66          | -0.33        |
| -1.00                  | -0.69                  | -0.29         | -0.36         | -0.47        |
| 0.74                   | -0.55                  | -0.27         | -0.95         | -0.55        |
| 1.18                   | -0.82                  | -0.28         | -0.60         | -0.75        |
| 0.10                   | 0.11                   | -0.30         | -0.84         | 0.22         |
| -0.87                  | -0.40                  | -0.27         | -0.14         | 0.34         |
| 0.81                   | 2.24                   | 0.28          | 2.12          | -0.47        |
| -0.96                  | -0.41                  | -0.31         | -0.42         | -0.28        |
| 1.51                   | 0.05                   | -0.29         | 1.33          | -0.34        |
| 0.48                   | 0.89                   | -0.11         | -0.23         | -0.55        |
| -0.06                  | -0.01                  | -0.34         | 1.83          | -0.09        |
| 2.70                   | -0.97                  | -0.11         | 0.97          | -0.66        |
| 0.35                   | 3.48                   | -0.36         | 0.82          | -0.70        |
| 0.67                   | 1.35                   | 4.92          | 0.33          | -0.73        |
| -0.08                  | -0.66                  | -0.13         | -0.68         | -0.59        |
| -0.21                  | 0.65                   | -0.34         | 1.08          | 0.63         |
| -0.38                  | 0.22                   | -0.24         | 1.15          | 0.11         |
| -0.75                  | -0.49                  | -0.28         | -0.14         | -0.42        |
| -1.54                  | -0.73                  | -0.29         | -1.54         | 2.90         |
| -1.00                  | -0.65                  | -0.26         | -0.70         | 0.52         |
| 0.18                   | -0.04                  | 0.30          | -1.39         | -0.43        |
| 0.35                   | 0.44                   | 7.55          | -1.44         | -0.82        |
| 0.59                   | 1.50                   | -0.25         | -0.55         | -0.10        |
| 1.88                   | 0.91                   | -0.33         | -0.50         | -0.31        |
| -0.44                  | -0.69                  | -0.34         | -0.84         | 0.66         |
| 0.10                   | 2.19                   | -0.35         | -0.24         | -0.23        |
| -1.48                  | -0.47                  | -0.11         | -0.17         | 10.28        |
| -0.17                  | -0.25                  | -0.33         | 0.23          | -0.91        |
| -0.19                  | -0.22                  | -0.30         | 0.20          | -0.87        |
| 0.09                   | -0.20                  | -0.31         | 1.05          | -0.64        |
| -1.20                  | -1.10                  | -0.21         | -1.85         | -0.76        |

---



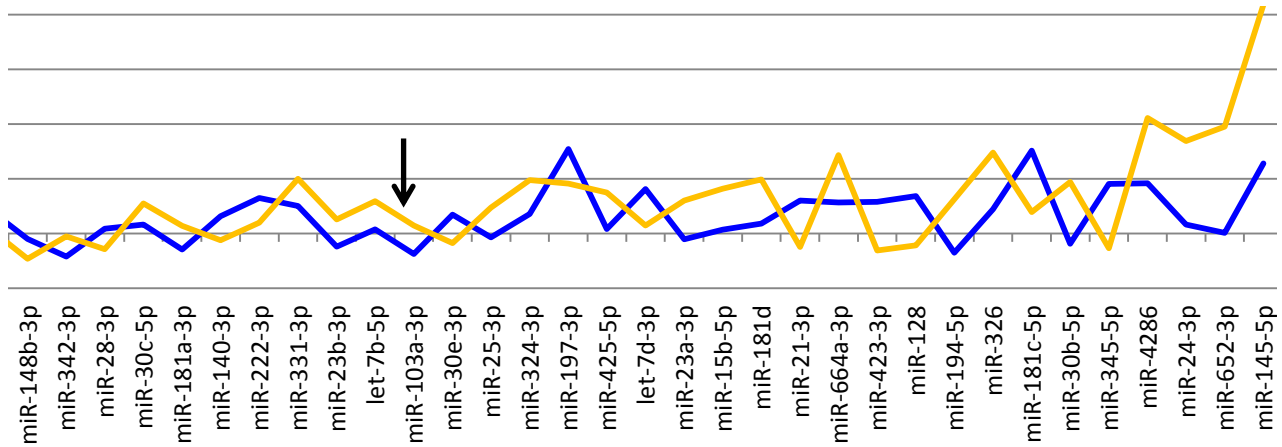

|             |       |       |       |       |       |
|-------------|-------|-------|-------|-------|-------|
| miR-148b-3p |       |       |       |       |       |
| miR-342-3p  |       |       |       |       |       |
| miR-28-3p   |       |       |       |       |       |
| miR-30c-5p  |       |       |       |       |       |
| miR-181a-3p |       |       |       |       |       |
| miR-140-3p  |       |       |       |       |       |
| miR-222-3p  |       |       |       |       |       |
| miR-331-3p  |       |       |       |       |       |
| miR-23b-3p  |       |       |       |       |       |
| let-7b-5p   |       |       |       |       |       |
| miR-103a-3p |       |       |       |       |       |
| miR-30e-3p  |       |       |       |       |       |
| miR-25-3p   |       |       |       |       |       |
| miR-324-3p  |       |       |       |       |       |
| miR-197-3p  |       |       |       |       |       |
| miR-425-5p  |       |       |       |       |       |
| let-7d-3p   |       |       |       |       |       |
| miR-23a-3p  |       |       |       |       |       |
| miR-15b-5p  |       |       |       |       |       |
| miR-181d    |       |       |       |       |       |
| miR-21-3p   |       |       |       |       |       |
| miR-664a-3p |       |       |       |       |       |
| miR-423-3p  |       |       |       |       |       |
| miR-128     |       |       |       |       |       |
| miR-194-5p  |       |       |       |       |       |
| miR-326     |       |       |       |       |       |
| miR-181c-5p |       |       |       |       |       |
| miR-30b-5p  |       |       |       |       |       |
| miR-345-5p  |       |       |       |       |       |
| miR-4286    |       |       |       |       |       |
| miR-24-3p   |       |       |       |       |       |
| miR-652-3p  |       |       |       |       |       |
| miR-145-5p  |       |       |       |       |       |
|             | -0.19 |       | -0.33 | 0.59  | 0.94  |
|             | 0.17  | -0.21 | -0.15 | -0.66 | 0.19  |
|             | 0.44  | -0.16 | 7.33  | -0.92 | -0.78 |
|             | -0.66 | -0.56 | -0.30 | 0.18  | 0.28  |
|             | -0.97 | -0.42 | -0.01 | 0.00  | 0.93  |
|             | -1.25 | 0.13  | -0.11 | -0.57 | 1.15  |
|             | 0.92  | -0.29 | -0.11 | -0.57 | -0.85 |
|             | -0.16 | -0.18 | 5.92  | -1.16 | -0.85 |
|             | -0.31 | -0.58 | -0.09 | -0.95 | 0.08  |
|             | 0.62  | -0.77 | 0.03  | -0.94 | -0.08 |
|             | 1.70  | -0.51 | 0.15  | -1.03 | -0.75 |
|             | 1.27  | 1.76  | 0.24  | -0.22 | -0.53 |
|             | -0.54 | -0.11 | -0.21 | -0.75 | -0.90 |
|             | -0.18 | 1.52  | -0.36 | 0.40  | 1.04  |
|             | -0.29 | -0.71 | 1.03  | -0.30 | -0.07 |
|             | 0.23  | 0.51  | 0.48  | 0.84  | 0.14  |
|             | 1.44  | -0.15 | 0.20  | -0.90 | -0.21 |
|             | 0.50  | 0.88  | 0.19  | -0.39 | -0.82 |
|             | 0.11  | -0.54 | 0.18  | 0.11  | -0.73 |
|             | -0.97 | -0.02 | 0.01  | 0.69  | -0.49 |
|             | 0.17  | -0.54 | -0.37 | 5.89  | -0.23 |
|             | -0.19 | 0.07  | 0.10  | 0.10  | -0.45 |
|             | -1.09 | 2.29  | -0.37 | 1.10  | -0.60 |
|             | 1.84  | 0.71  | -0.39 | -0.49 | -0.48 |
|             | 0.00  | 0.19  | 0.40  | 1.73  | -0.82 |
|             | -0.93 | 0.65  | -0.19 | 0.81  | -0.33 |
|             | -0.38 | -0.26 | -0.24 | -0.94 | 0.26  |
|             | -1.02 | -0.08 | 0.16  | 0.44  | -0.18 |
|             | 0.71  | 0.22  | -0.21 | -0.47 | 0.13  |
|             | 0.35  | 1.72  | 4.72  | 1.20  | -0.69 |
|             | -0.44 | 0.06  | 12.72 | 0.08  | -0.97 |
|             | -0.24 | 0.29  | -0.30 | -0.09 | 0.46  |
|             | -0.52 | 0.26  | -0.07 | 0.35  | -0.61 |
|             | 2.45  | -0.17 | 0.05  | -0.73 | -0.35 |
|             | 0.50  | 2.06  | -0.27 | 2.00  | -0.91 |
|             | 1.02  | -0.16 | -0.27 | 0.09  | 0.16  |
|             | 0.20  | 2.43  | 0.71  | 0.77  | -0.63 |
|             | -0.39 | -0.29 | -0.29 | 0.46  | -0.53 |
|             | -0.23 | -0.09 | -0.19 | 1.47  | -0.11 |
|             | 0.38  | 0.15  | -0.11 | -1.15 | -0.24 |
|             |       | -0.39 | -0.16 | -0.87 | -0.77 |
|             | 0.03  | 0.03  | 0.03  | 0.04  | 0.04  |
|             | 0.07  | 0.06  | 0.05  | 0.08  | 0.02  |











































































































































































|         |       |          |         |         |        |         |
|---------|-------|----------|---------|---------|--------|---------|
| 1217409 | 19623 | 4032681  | 1739788 | 1227867 | 121631 | 2029037 |
|         | 1     |          |         |         |        |         |
|         |       |          |         |         |        |         |
|         | 1     |          |         |         |        |         |
| 15      | 16    | 17       | 18      | 19      | 20     | 21      |
| 15      | 16    | 17       | 18      | 19      | 20     | 21      |
| C_47    | D_15  | D_16     | D_17    | D_18    | D_36   | D_4     |
| UC      | UC    | UC       | UC      | UC      | UC     | UC      |
| 7784665 | 68312 | 11547045 | 3054238 | 4012517 | 291206 | 4268943 |
| 0.29    | 0.77  | 0.93     | 0.77    | 0.96    | 0.81   | 0.31    |
| C_47    | D_15  | D_16     | D_17    | D_18    | D_36   | D_4     |
| 6567256 | 48689 | 7514364  | 1314450 | 2784650 | 169575 | 2239906 |
| 620936  | 3363  | 1531849  | 492299  | 434340  | 43427  | 587465  |
| 53388   | 438   | 439203   | 147428  | 121333  | 5509   | 392427  |
| 104165  | 992   | 146839   | 114004  | 91145   | 9645   | 124341  |
| 85023   | 242   | 257462   | 91626   | 107193  | 4797   | 72204   |
| 112601  | 191   | 216353   | 94252   | 142992  | 8299   | 141988  |
| 8973    | 850   | 236351   | 141379  | 15073   | 9190   | 79097   |
| 17934   | 630   | 96321    | 83961   | 47442   | 3216   | 84166   |
| 1841    | 379   | 37646    | 20264   | 2086    | 2689   | 22024   |
| 5596    | 64    | 123431   | 89451   | 13489   | 4537   | 31482   |
| 16782   | 477   | 131928   | 36434   | 18771   | 3976   | 62023   |
| 6932    | 89    | 54535    | 25861   | 12887   | 1522   | 18899   |
| 17594   | 264   | 56370    | 31108   | 22005   | 2555   | 23168   |
| 5475    | 153   | 38107    | 22508   | 7706    | 971    | 12274   |
| 28330   | 118   | 51226    | 11534   | 21866   | 1929   | 12074   |
| 1335    | 172   | 31921    | 26946   | 1105    | 878    | 11836   |
| 13042   | 41    | 25011    | 19800   | 10553   | 1128   | 4026    |
| 1022    | 41    | 20229    | 15122   | 1285    | 446    | 15501   |
| 4615    | 54    | 46387    | 16987   | 6462    | 1895   | 18873   |
| 2969    | 105   | 28660    | 20805   | 5612    | 488    | 16615   |
| 4816    | 2401  | 26135    | 12362   | 8659    | 600    | 32768   |
| 5000    | 88    | 30117    | 7562    | 10288   | 817    | 13028   |
| 4814    | 31    | 29467    | 7813    | 6300    | 967    | 7672    |
| 1009    | 290   | 12100    | 8758    | 2850    | 234    | 19089   |
| 1373    | 59    | 9499     | 7671    | 2046    | 566    | 28264   |
| 870     | 36    | 7633     | 5119    | 1917    | 178    | 10212   |
| 3686    | 333   | 20525    | 7101    | 7076    | 537    | 10933   |
| 6404    | 34    | 20654    | 5910    | 7129    | 645    | 4277    |
| 1026    | 3579  | 18939    | 7643    | 1260    | 364    | 10771   |
| 2036    | 110   | 12409    | 8787    | 2516    | 387    | 4527    |
| 1998    | 77    | 9324     | 6564    | 5175    | 240    | 6960    |
| 1630    | 50    | 12062    | 8726    | 3465    | 314    | 10061   |
| 5761    | 9     | 11175    | 4139    | 5507    | 350    | 3526    |
| 788     | 53    | 4610     | 6155    | 1070    | 183    | 3160    |
| 433     | 37    | 2976     | 6071    | 563     | 195    | 2703    |
| 1927    | 99    | 11404    | 8133    | 2321    | 358    | 4165    |
| 4579    | 118   | 15472    | 4644    | 5836    | 512    | 6346    |
| 2027    | 378   | 9964     | 6651    | 1732    | 412    | 11395   |
| 1363    | 76    | 5458     | 5447    | 1530    | 86     | 5968    |
| 4960    | 66    | 16089    | 2287    | 4079    | 147    | 2913    |
| 5636    | 23    | 3617     | 1490    | 1957    | 326    | 4804    |
| 3358    | 16    | 8931     | 2670    | 3233    | 198    | 3231    |
| 3586    | 7     | 5684     | 4329    | 4867    | 184    | 5708    |
| 2625    | 31    | 7925     | 2349    | 3039    | 188    | 2382    |
| 300     | 83    | 3066     | 2256    | 253     | 170    | 2355    |
| 1427    | 25    | 3568     | 2368    | 2760    | 171    | 3494    |

|      |      |      |      |      |     |      |
|------|------|------|------|------|-----|------|
| 976  | 14   | 4992 | 3193 | 1653 | 129 | 3229 |
| 625  | 37   | 4186 | 6725 | 1846 | 117 | 2667 |
| 2186 | 11   | 6822 | 1728 | 1775 | 172 | 2486 |
| 93   | 1    | 383  | 435  | 64   | 31  | 80   |
| 312  | 362  | 2173 | 2128 | 395  | 126 | 4109 |
| 1635 | 18   | 3862 | 1835 | 1788 | 180 | 1747 |
| 438  | 47   | 4225 | 2672 | 1062 | 140 | 2942 |
| 1098 | 42   | 5394 | 1923 | 1901 | 222 | 2882 |
| 780  | 1079 | 4437 | 2415 | 575  | 78  | 5573 |
| 341  | 9    | 3705 | 2029 | 2316 | 76  | 1983 |
| 37   | 37   | 451  | 461  | 60   | 39  | 227  |
| 598  | 55   | 5246 | 2251 | 1394 | 113 | 1423 |
| 676  | 1    | 2867 | 2062 | 913  | 111 | 1974 |
| 791  | 5    | 3497 | 1840 | 978  | 111 | 2194 |
| 1146 | 15   | 3517 | 1056 | 1417 | 59  | 898  |
| 612  | 3    | 2243 | 1912 | 843  | 93  | 836  |
| 737  | 19   | 2703 | 1636 | 1016 | 88  | 3769 |
| 68   | 11   | 723  | 1288 | 51   | 23  | 386  |
| 42   | 0    | 601  | 274  | 74   | 6   | 84   |
| 1509 | 5    | 2844 | 1145 | 590  | 114 | 457  |
| 251  | 10   | 3331 | 1525 | 451  | 120 | 840  |
| 117  | 5    | 798  | 1235 | 314  | 42  | 704  |
| 99   | 10   | 1680 | 876  | 208  | 37  | 380  |
| 241  | 3    | 1830 | 858  | 519  | 57  | 1216 |
| 398  | 102  | 2905 | 960  | 452  | 16  | 2410 |
| 580  | 16   | 2014 | 1137 | 1058 | 56  | 805  |
| 1487 | 8    | 2019 | 587  | 646  | 87  | 454  |
| 70   | 0    | 1377 | 1240 | 58   | 38  | 564  |
| 250  | 107  | 3183 | 926  | 510  | 129 | 1034 |
| 133  | 5    | 1190 | 1295 | 434  | 52  | 959  |
| 809  | 5    | 1462 | 931  | 519  | 117 | 502  |
| 345  | 58   | 3552 | 1119 | 1401 | 66  | 1446 |
| 535  | 158  | 1422 | 632  | 537  | 32  | 587  |
| 817  | 1    | 1746 | 770  | 606  | 124 | 499  |
| 376  | 11   | 1062 | 2057 | 577  | 98  | 547  |
| 233  | 12   | 1547 | 766  | 487  | 57  | 349  |
| 766  | 1    | 1060 | 836  | 617  | 79  | 582  |
| 845  | 14   | 1501 | 543  | 433  | 21  | 517  |
| 58   | 4    | 627  | 710  | 365  | 13  | 243  |
| 71   | 18   | 888  | 703  | 387  | 25  | 683  |
| 397  | 1    | 1200 | 563  | 776  | 63  | 412  |
| 628  | 6    | 964  | 846  | 539  | 42  | 652  |
| 59   | 7    | 627  | 802  | 33   | 60  | 416  |
| 88   | 6    | 925  | 615  | 124  | 42  | 430  |
| 502  | 1    | 1082 | 436  | 289  | 45  | 300  |
| 338  | 143  | 676  | 397  | 582  | 43  | 694  |
| 16   | 0    | 258  | 79   | 13   | 1   | 4    |
| 187  | 0    | 859  | 406  | 528  | 23  | 268  |
| 51   | 2    | 1244 | 906  | 146  | 81  | 241  |
| 37   | 2    | 460  | 464  | 57   | 23  | 183  |
| 73   | 1    | 545  | 810  | 139  | 24  | 370  |
| 330  | 6    | 912  | 426  | 324  | 13  | 457  |
| 332  | 10   | 833  | 359  | 292  | 45  | 494  |
| 286  | 4    | 474  | 217  | 435  | 15  | 467  |
| 32   | 3    | 891  | 492  | 32   | 14  | 194  |
| 247  | 1    | 1137 | 179  | 324  | 50  | 811  |
| 105  | 3    | 522  | 481  | 278  | 33  | 502  |
| 299  | 1    | 556  | 387  | 344  | 20  | 218  |
| 79   | 4    | 418  | 760  | 149  | 22  | 399  |

|     |    |     |     |     |    |     |
|-----|----|-----|-----|-----|----|-----|
| 72  | 9  | 528 | 485 | 91  | 25 | 253 |
| 27  | 1  | 508 | 312 | 59  | 41 | 292 |
| 167 | 1  | 536 | 324 | 213 | 43 | 357 |
| 82  | 14 | 599 | 331 | 221 | 11 | 509 |
| 33  | 1  | 412 | 327 | 106 | 26 | 127 |
| 47  | 2  | 829 | 245 | 88  | 23 | 188 |
| 92  | 4  | 723 | 411 | 142 | 40 | 585 |
| 177 | 0  | 653 | 253 | 248 | 15 | 345 |
| 214 | 3  | 495 | 167 | 252 | 18 | 656 |
| 39  | 2  | 771 | 252 | 106 | 21 | 163 |
| 127 | 0  | 252 | 200 | 234 | 19 | 109 |
| 141 | 1  | 421 | 205 | 216 | 12 | 116 |
| 220 | 17 | 505 | 191 | 215 | 14 | 293 |
| 30  | 4  | 212 | 520 | 39  | 12 | 102 |
| 30  | 4  | 212 | 520 | 39  | 12 | 102 |
| 217 | 1  | 548 | 228 | 185 | 10 | 410 |
| 111 | 1  | 399 | 198 | 207 | 39 | 125 |
| 208 | 0  | 327 | 218 | 156 | 15 | 234 |
| 49  | 0  | 534 | 230 | 129 | 33 | 190 |
| 68  | 3  | 352 | 248 | 102 | 2  | 657 |
| 2   | 1  | 56  | 116 | 10  | 1  | 21  |
| 113 | 0  | 231 | 244 | 116 | 9  | 117 |
| 48  | 1  | 242 | 149 | 247 | 13 | 130 |
| 144 | 0  | 372 | 201 | 162 | 29 | 180 |
| 232 | 0  | 346 | 155 | 158 | 9  | 213 |
| 167 | 0  | 343 | 86  | 134 | 8  | 78  |
| 49  | 29 | 192 | 80  | 102 | 1  | 89  |
| 46  | 0  | 299 | 198 | 97  | 16 | 197 |
| 50  | 17 | 277 | 315 | 100 | 3  | 106 |
| 80  | 0  | 283 | 102 | 174 | 20 | 123 |
| 14  | 0  | 117 | 163 | 41  | 6  | 63  |
| 76  | 1  | 342 | 225 | 86  | 8  | 187 |
| 45  | 2  | 161 | 108 | 69  | 1  | 63  |
| 58  | 0  | 292 | 117 | 118 | 18 | 63  |
| 24  | 0  | 211 | 160 | 66  | 4  | 71  |
| 80  | 0  | 189 | 132 | 125 | 18 | 65  |
| 109 | 8  | 216 | 100 | 135 | 4  | 94  |
| 50  | 1  | 353 | 120 | 97  | 11 | 81  |
| 163 | 0  | 135 | 88  | 105 | 38 | 124 |
| 21  | 0  | 165 | 137 | 76  | 1  | 55  |
| 6   | 1  | 41  | 76  | 5   | 3  | 22  |
| 177 | 4  | 347 | 63  | 73  | 6  | 61  |
| 68  | 1  | 196 | 86  | 67  | 0  | 106 |
| 16  | 0  | 192 | 116 | 62  | 2  | 90  |
| 28  | 1  | 136 | 81  | 49  | 2  | 58  |
| 55  | 0  | 292 | 70  | 96  | 15 | 110 |
| 14  | 1  | 308 | 209 | 19  | 9  | 266 |
| 17  | 0  | 208 | 93  | 25  | 10 | 47  |
| 21  | 0  | 166 | 149 | 30  | 23 | 51  |
| 64  | 0  | 104 | 56  | 78  | 2  | 100 |
| 43  | 24 | 34  | 47  | 16  | 20 | 24  |
| 69  | 0  | 228 | 86  | 61  | 7  | 42  |
| 44  | 0  | 224 | 71  | 89  | 3  | 101 |
| 70  | 0  | 103 | 111 | 89  | 6  | 82  |
| 43  | 0  | 137 | 76  | 101 | 9  | 64  |
| 88  | 0  | 222 | 82  | 87  | 8  | 78  |
| 1   | 0  | 23  | 43  | 6   | 1  | 18  |
| 46  | 0  | 149 | 64  | 90  | 7  | 109 |
| 107 | 2  | 168 | 51  | 53  | 8  | 80  |



|     |    |     |     |     |    |     |
|-----|----|-----|-----|-----|----|-----|
| 3   | 0  | 129 | 107 | 16  | 6  | 71  |
| 7   | 0  | 131 | 180 | 17  | 1  | 114 |
| 83  | 1  | 155 | 94  | 51  | 7  | 36  |
| 45  | 0  | 146 | 55  | 59  | 5  | 129 |
| 121 | 0  | 54  | 66  | 20  | 3  | 152 |
| 4   | 0  | 69  | 72  | 77  | 3  | 47  |
| 97  | 0  | 176 | 77  | 68  | 11 | 29  |
| 0   | 0  | 110 | 2   | 108 | 1  | 94  |
| 8   | 0  | 117 | 87  | 43  | 2  | 36  |
| 61  | 1  | 167 | 88  | 62  | 5  | 106 |
| 29  | 1  | 312 | 102 | 25  | 4  | 198 |
| 9   | 1  | 134 | 56  | 14  | 3  | 80  |
| 46  | 0  | 219 | 38  | 58  | 3  | 57  |
| 21  | 0  | 195 | 87  | 39  | 6  | 14  |
| 10  | 3  | 90  | 82  | 71  | 8  | 121 |
| 54  | 0  | 145 | 38  | 70  | 11 | 49  |
| 67  | 0  | 100 | 56  | 76  | 9  | 23  |
| 97  | 0  | 121 | 40  | 46  | 4  | 36  |
| 5   | 0  | 106 | 82  | 8   | 2  | 50  |
| 40  | 0  | 139 | 60  | 35  | 3  | 19  |
| 0   | 0  | 110 | 103 | 18  | 3  | 53  |
| 40  | 18 | 117 | 66  | 37  | 2  | 50  |
| 72  | 0  | 116 | 49  | 28  | 10 | 34  |
| 5   | 0  | 101 | 81  | 6   | 2  | 48  |
| 42  | 0  | 107 | 31  | 18  | 5  | 22  |
| 24  | 0  | 82  | 171 | 24  | 2  | 54  |
| 8   | 6  | 97  | 114 | 42  | 0  | 44  |
| 2   | 0  | 37  | 48  | 65  | 0  | 1   |
| 3   | 1  | 92  | 90  | 7   | 9  | 63  |
| 19  | 0  | 136 | 89  | 30  | 6  | 99  |
| 42  | 0  | 118 | 60  | 23  | 5  | 54  |
| 32  | 28 | 133 | 55  | 48  | 4  | 69  |
| 15  | 2  | 63  | 61  | 35  | 1  | 39  |
| 1   | 10 | 61  | 37  | 8   | 1  | 37  |
| 34  | 0  | 139 | 40  | 55  | 8  | 23  |
| 17  | 1  | 109 | 52  | 44  | 10 | 38  |
| 26  | 0  | 142 | 70  | 26  | 0  | 11  |
| 57  | 0  | 97  | 38  | 35  | 3  | 72  |
| 18  | 3  | 92  | 75  | 25  | 6  | 70  |
| 80  | 0  | 90  | 28  | 60  | 4  | 59  |
| 22  | 47 | 147 | 54  | 38  | 0  | 50  |
| 3   | 0  | 75  | 47  | 10  | 1  | 24  |
| 34  | 0  | 62  | 34  | 49  | 4  | 12  |
| 59  | 0  | 101 | 29  | 23  | 5  | 68  |
| 40  | 2  | 132 | 51  | 37  | 2  | 72  |
| 23  | 0  | 69  | 14  | 58  | 3  | 57  |
| 56  | 0  | 112 | 21  | 31  | 4  | 17  |
| 48  | 0  | 100 | 33  | 25  | 7  | 38  |
| 17  | 0  | 121 | 77  | 34  | 4  | 135 |
| 5   | 3  | 40  | 48  | 3   | 13 | 37  |
| 66  | 0  | 123 | 38  | 54  | 7  | 23  |
| 6   | 0  | 78  | 47  | 21  | 2  | 41  |
| 23  | 0  | 89  | 50  | 37  | 0  | 82  |
| 11  | 0  | 68  | 62  | 34  | 0  | 41  |
| 12  | 0  | 100 | 44  | 21  | 10 | 36  |
| 1   | 0  | 29  | 13  | 0   | 0  | 2   |
| 16  | 0  | 59  | 22  | 30  | 3  | 31  |
| 7   | 4  | 53  | 13  | 16  | 0  | 62  |
| 28  | 0  | 110 | 41  | 27  | 4  | 29  |

|    |   |     |    |    |   |    |
|----|---|-----|----|----|---|----|
| 9  | 0 | 62  | 28 | 30 | 0 | 32 |
| 19 | 0 | 127 | 35 | 38 | 1 | 18 |
| 7  | 0 | 54  | 41 | 15 | 5 | 13 |
| 47 | 0 | 43  | 21 | 28 | 1 | 23 |
| 14 | 0 | 53  | 23 | 31 | 3 | 19 |
| 27 | 1 | 49  | 35 | 36 | 5 | 33 |
| 42 | 0 | 51  | 25 | 23 | 3 | 28 |
| 9  | 0 | 84  | 24 | 43 | 0 | 25 |
| 6  | 1 | 48  | 46 | 8  | 3 | 54 |
| 27 | 0 | 87  | 22 | 34 | 2 | 39 |
| 1  | 1 | 14  | 19 | 0  | 1 | 8  |
| 32 | 0 | 41  | 34 | 34 | 0 | 11 |
| 2  | 1 | 54  | 50 | 13 | 2 | 9  |
| 20 | 0 | 71  | 4  | 29 | 4 | 19 |
| 19 | 0 | 30  | 20 | 31 | 1 | 12 |
| 2  | 1 | 21  | 28 | 4  | 0 | 32 |
| 2  | 0 | 53  | 39 | 7  | 1 | 35 |
| 6  | 0 | 57  | 29 | 20 | 1 | 15 |
| 4  | 0 | 52  | 26 | 8  | 5 | 5  |
| 1  | 0 | 41  | 32 | 14 | 2 | 15 |
| 0  | 1 | 42  | 23 | 4  | 1 | 47 |
| 4  | 1 | 34  | 11 | 11 | 0 | 37 |
| 4  | 1 | 34  | 11 | 11 | 0 | 37 |
| 27 | 0 | 42  | 15 | 10 | 1 | 6  |
| 12 | 0 | 55  | 14 | 20 | 1 | 23 |
| 7  | 2 | 51  | 12 | 14 | 1 | 17 |
| 10 | 0 | 45  | 31 | 8  | 3 | 0  |
| 11 | 0 | 29  | 16 | 12 | 0 | 19 |
| 11 | 0 | 44  | 28 | 26 | 0 | 51 |
| 3  | 0 | 51  | 29 | 4  | 1 | 13 |
| 11 | 0 | 54  | 14 | 10 | 3 | 6  |
| 10 | 0 | 32  | 17 | 27 | 0 | 8  |
| 6  | 0 | 58  | 14 | 2  | 2 | 60 |
| 6  | 0 | 95  | 7  | 59 | 0 | 16 |
| 9  | 0 | 21  | 33 | 13 | 2 | 5  |
| 6  | 0 | 69  | 13 | 33 | 0 | 19 |
| 0  | 0 | 5   | 2  | 0  | 0 | 0  |
| 12 | 0 | 45  | 21 | 15 | 0 | 20 |
| 4  | 0 | 31  | 40 | 1  | 0 | 18 |
| 18 | 0 | 30  | 22 | 16 | 0 | 14 |
| 30 | 0 | 60  | 15 | 22 | 0 | 8  |
| 4  | 0 | 30  | 40 | 1  | 0 | 17 |
| 15 | 0 | 50  | 29 | 13 | 4 | 10 |
| 16 | 0 | 41  | 9  | 32 | 3 | 6  |
| 7  | 0 | 38  | 21 | 14 | 3 | 13 |
| 12 | 0 | 36  | 14 | 13 | 1 | 5  |
| 0  | 1 | 8   | 1  | 1  | 0 | 2  |
| 17 | 0 | 19  | 9  | 12 | 7 | 11 |
| 34 | 0 | 57  | 10 | 14 | 3 | 15 |
| 26 | 0 | 33  | 6  | 20 | 0 | 12 |
| 10 | 0 | 23  | 15 | 11 | 3 | 8  |
| 2  | 0 | 36  | 14 | 15 | 1 | 42 |
| 0  | 0 | 8   | 8  | 0  | 0 | 3  |
| 17 | 0 | 33  | 10 | 9  | 0 | 14 |
| 2  | 0 | 22  | 29 | 2  | 1 | 22 |
| 95 | 0 | 1   | 0  | 0  | 7 | 0  |
| 15 | 0 | 29  | 12 | 16 | 0 | 9  |
| 9  | 0 | 24  | 16 | 13 | 2 | 10 |
| 12 | 0 | 40  | 9  | 12 | 0 | 26 |

|    |   |    |    |    |   |    |
|----|---|----|----|----|---|----|
| 27 | 0 | 39 | 10 | 12 | 5 | 6  |
| 10 | 0 | 16 | 23 | 26 | 4 | 8  |
| 9  | 0 | 19 | 18 | 9  | 3 | 9  |
| 10 | 0 | 23 | 12 | 15 | 2 | 19 |
| 13 | 0 | 18 | 23 | 10 | 4 | 0  |
| 14 | 0 | 38 | 11 | 22 | 2 | 26 |
| 2  | 0 | 21 | 27 | 2  | 1 | 21 |
| 13 | 0 | 7  | 12 | 5  | 2 | 5  |
| 1  | 1 | 12 | 26 | 1  | 0 | 5  |
| 3  | 1 | 7  | 13 | 0  | 1 | 16 |
| 0  | 1 | 17 | 27 | 12 | 0 | 32 |
| 5  | 0 | 35 | 8  | 20 | 1 | 19 |
| 0  | 0 | 11 | 16 | 9  | 2 | 10 |
| 22 | 0 | 6  | 7  | 2  | 4 | 6  |
| 7  | 0 | 20 | 17 | 9  | 3 | 10 |
| 3  | 0 | 28 | 21 | 1  | 3 | 11 |
| 13 | 0 | 48 | 19 | 8  | 0 | 13 |
| 8  | 0 | 22 | 17 | 15 | 0 | 14 |
| 4  | 0 | 17 | 17 | 16 | 0 | 13 |
| 2  | 0 | 20 | 7  | 5  | 3 | 5  |
| 10 | 0 | 20 | 12 | 8  | 2 | 5  |
| 19 | 0 | 16 | 10 | 11 | 0 | 7  |
| 10 | 0 | 30 | 7  | 8  | 0 | 11 |
| 21 | 0 | 20 | 23 | 21 | 3 | 6  |
| 3  | 1 | 23 | 22 | 3  | 2 | 36 |
| 15 | 0 | 9  | 3  | 11 | 3 | 25 |
| 23 | 0 | 10 | 21 | 19 | 0 | 8  |
| 17 | 0 | 7  | 20 | 7  | 1 | 6  |
| 11 | 0 | 14 | 11 | 9  | 3 | 19 |
| 5  | 1 | 18 | 27 | 6  | 0 | 11 |
| 7  | 0 | 24 | 3  | 2  | 1 | 18 |
| 0  | 1 | 11 | 10 | 0  | 1 | 13 |
| 3  | 0 | 5  | 28 | 1  | 1 | 20 |
| 6  | 0 | 21 | 8  | 9  | 0 | 3  |
| 2  | 0 | 33 | 9  | 3  | 1 | 6  |
| 10 | 0 | 34 | 6  | 6  | 0 | 8  |
| 1  | 1 | 36 | 6  | 18 | 0 | 13 |
| 6  | 0 | 31 | 9  | 17 | 0 | 13 |
| 5  | 0 | 18 | 12 | 21 | 0 | 4  |
| 6  | 0 | 23 | 15 | 9  | 2 | 1  |
| 1  | 0 | 12 | 22 | 4  | 1 | 8  |
| 4  | 0 | 25 | 12 | 8  | 0 | 19 |
| 3  | 0 | 17 | 5  | 6  | 1 | 1  |
| 8  | 0 | 29 | 12 | 14 | 0 | 4  |
| 4  | 0 | 22 | 13 | 4  | 1 | 10 |
| 4  | 0 | 16 | 22 | 8  | 3 | 2  |
| 10 | 0 | 15 | 12 | 8  | 0 | 3  |
| 2  | 0 | 25 | 2  | 6  | 0 | 4  |
| 15 | 0 | 17 | 5  | 11 | 0 | 2  |
| 3  | 0 | 15 | 7  | 5  | 0 | 17 |
| 14 | 0 | 22 | 5  | 4  | 1 | 5  |
| 0  | 0 | 11 | 9  | 1  | 0 | 5  |
| 2  | 0 | 13 | 7  | 1  | 0 | 4  |
| 2  | 0 | 12 | 12 | 0  | 0 | 12 |
| 2  | 0 | 33 | 7  | 14 | 1 | 5  |
| 6  | 0 | 17 | 4  | 7  | 0 | 5  |
| 9  | 0 | 13 | 12 | 9  | 2 | 9  |
| 0  | 4 | 1  | 1  | 1  | 0 | 0  |
| 9  | 1 | 30 | 6  | 6  | 0 | 8  |

|    |   |    |    |    |   |    |
|----|---|----|----|----|---|----|
| 4  | 9 | 13 | 14 | 5  | 1 | 15 |
| 16 | 0 | 13 | 11 | 10 | 0 | 5  |
| 1  | 0 | 19 | 6  | 8  | 1 | 8  |
| 5  | 0 | 15 | 11 | 10 | 2 | 9  |
| 5  | 0 | 7  | 11 | 6  | 0 | 19 |
| 2  | 0 | 26 | 3  | 6  | 2 | 6  |
| 15 | 0 | 24 | 5  | 7  | 0 | 12 |
| 0  | 0 | 5  | 10 | 1  | 2 | 7  |
| 4  | 0 | 26 | 6  | 4  | 0 | 1  |
| 7  | 0 | 7  | 11 | 7  | 1 | 5  |
| 3  | 0 | 13 | 11 | 5  | 2 | 5  |
| 0  | 0 | 12 | 4  | 8  | 0 | 6  |
| 9  | 0 | 9  | 6  | 10 | 0 | 15 |
| 0  | 0 | 4  | 10 | 1  | 0 | 3  |
| 13 | 0 | 5  | 6  | 5  | 0 | 8  |
| 6  | 0 | 7  | 6  | 3  | 0 | 14 |
| 2  | 0 | 8  | 5  | 1  | 1 | 7  |
| 1  | 0 | 18 | 8  | 5  | 1 | 9  |
| 1  | 0 | 14 | 3  | 1  | 1 | 7  |
| 2  | 0 | 11 | 5  | 7  | 0 | 7  |
| 4  | 0 | 15 | 1  | 2  | 0 | 10 |
| 2  | 1 | 20 | 6  | 1  | 0 | 10 |
| 5  | 0 | 7  | 2  | 2  | 0 | 1  |
| 4  | 1 | 12 | 7  | 4  | 2 | 7  |
| 5  | 0 | 21 | 4  | 1  | 0 | 8  |
| 1  | 0 | 11 | 4  | 4  | 2 | 4  |
| 0  | 0 | 3  | 3  | 0  | 0 | 7  |
| 0  | 0 | 4  | 3  | 0  | 0 | 2  |
| 6  | 0 | 24 | 5  | 3  | 0 | 3  |
| 3  | 0 | 14 | 5  | 9  | 0 | 4  |
| 6  | 0 | 3  | 2  | 5  | 0 | 1  |
| 1  | 0 | 14 | 3  | 8  | 0 | 3  |
| 4  | 0 | 9  | 1  | 3  | 0 | 4  |
| 5  | 0 | 11 | 6  | 5  | 0 | 8  |
| 0  | 0 | 7  | 6  | 1  | 0 | 2  |
| 6  | 0 | 6  | 2  | 3  | 0 | 1  |
| 2  | 0 | 21 | 5  | 3  | 0 | 1  |
| 10 | 0 | 14 | 2  | 4  | 0 | 6  |
| 8  | 0 | 9  | 9  | 1  | 0 | 2  |
| 2  | 0 | 4  | 5  | 5  | 1 | 11 |
| 1  | 0 | 5  | 2  | 1  | 1 | 30 |
| 0  | 0 | 3  | 3  | 4  | 1 | 5  |
| 2  | 0 | 12 | 5  | 5  | 1 | 4  |
| 10 | 0 | 5  | 3  | 3  | 0 | 1  |
| 4  | 0 | 7  | 2  | 5  | 0 | 7  |
| 2  | 0 | 9  | 1  | 2  | 3 | 12 |
| 0  | 0 | 5  | 6  | 1  | 0 | 4  |
| 4  | 0 | 11 | 10 | 6  | 0 | 4  |
| 1  | 0 | 4  | 7  | 2  | 0 | 6  |
| 1  | 0 | 3  | 8  | 7  | 0 | 1  |
| 4  | 0 | 8  | 4  | 1  | 2 | 2  |
| 0  | 0 | 4  | 4  | 1  | 0 | 4  |
| 2  | 0 | 10 | 5  | 0  | 1 | 3  |
| 3  | 0 | 12 | 0  | 2  | 0 | 7  |
| 5  | 0 | 2  | 9  | 5  | 0 | 5  |
| 2  | 0 | 6  | 4  | 0  | 0 | 16 |
| 3  | 0 | 13 | 1  | 7  | 0 | 5  |
| 6  | 0 | 8  | 1  | 5  | 0 | 10 |
| 2  | 0 | 18 | 6  | 2  | 1 | 3  |

|    |   |    |   |   |   |    |
|----|---|----|---|---|---|----|
| 2  | 0 | 11 | 5 | 0 | 0 | 4  |
| 0  | 0 | 9  | 4 | 6 | 1 | 2  |
| 0  | 0 | 8  | 9 | 0 | 2 | 23 |
| 1  | 0 | 5  | 5 | 1 | 0 | 3  |
| 0  | 0 | 9  | 3 | 1 | 0 | 1  |
| 3  | 0 | 7  | 3 | 4 | 0 | 3  |
| 5  | 0 | 14 | 7 | 2 | 0 | 8  |
| 0  | 0 | 8  | 0 | 1 | 0 | 4  |
| 6  | 0 | 8  | 2 | 2 | 0 | 0  |
| 6  | 1 | 2  | 2 | 2 | 0 | 1  |
| 0  | 0 | 7  | 7 | 0 | 0 | 7  |
| 1  | 1 | 2  | 4 | 0 | 0 | 0  |
| 0  | 0 | 1  | 0 | 0 | 0 | 0  |
| 0  | 0 | 4  | 4 | 0 | 0 | 2  |
| 3  | 0 | 11 | 2 | 8 | 0 | 0  |
| 1  | 0 | 3  | 5 | 2 | 1 | 2  |
| 5  | 0 | 5  | 3 | 1 | 0 | 1  |
| 0  | 0 | 6  | 8 | 3 | 0 | 2  |
| 0  | 0 | 1  | 2 | 1 | 0 | 1  |
| 1  | 0 | 2  | 5 | 1 | 0 | 1  |
| 2  | 0 | 5  | 3 | 1 | 1 | 5  |
| 1  | 0 | 3  | 6 | 0 | 0 | 3  |
| 4  | 0 | 17 | 5 | 3 | 0 | 1  |
| 3  | 0 | 2  | 2 | 1 | 1 | 2  |
| 1  | 0 | 9  | 2 | 7 | 1 | 1  |
| 0  | 0 | 0  | 3 | 0 | 0 | 2  |
| 1  | 0 | 6  | 1 | 3 | 1 | 0  |
| 1  | 0 | 9  | 2 | 2 | 0 | 7  |
| 4  | 0 | 9  | 1 | 4 | 0 | 1  |
| 1  | 0 | 2  | 5 | 3 | 0 | 5  |
| 0  | 0 | 1  | 2 | 0 | 0 | 0  |
| 0  | 0 | 11 | 9 | 0 | 0 | 5  |
| 3  | 0 | 7  | 1 | 6 | 0 | 2  |
| 8  | 0 | 3  | 2 | 3 | 0 | 0  |
| 4  | 0 | 0  | 2 | 0 | 0 | 7  |
| 2  | 0 | 15 | 3 | 6 | 0 | 4  |
| 0  | 0 | 6  | 2 | 2 | 0 | 0  |
| 0  | 0 | 4  | 5 | 1 | 0 | 1  |
| 1  | 0 | 5  | 3 | 2 | 0 | 6  |
| 1  | 0 | 3  | 2 | 0 | 2 | 0  |
| 0  | 0 | 1  | 0 | 0 | 1 | 0  |
| 0  | 0 | 3  | 3 | 1 | 0 | 1  |
| 2  | 0 | 4  | 3 | 4 | 0 | 3  |
| 0  | 0 | 14 | 2 | 3 | 0 | 2  |
| 3  | 0 | 9  | 3 | 2 | 0 | 1  |
| 0  | 0 | 2  | 2 | 0 | 0 | 1  |
| 0  | 0 | 2  | 5 | 0 | 0 | 1  |
| 7  | 0 | 5  | 1 | 4 | 0 | 3  |
| 2  | 0 | 7  | 3 | 2 | 0 | 2  |
| 4  | 0 | 6  | 2 | 7 | 0 | 3  |
| 0  | 0 | 7  | 5 | 2 | 1 | 10 |
| 0  | 0 | 7  | 5 | 0 | 0 | 3  |
| 13 | 0 | 5  | 2 | 1 | 2 | 1  |
| 1  | 0 | 1  | 2 | 0 | 0 | 6  |
| 0  | 0 | 10 | 5 | 2 | 0 | 0  |
| 1  | 0 | 3  | 3 | 0 | 0 | 6  |
| 0  | 0 | 10 | 5 | 5 | 0 | 4  |
| 0  | 0 | 12 | 1 | 4 | 1 | 2  |
| 2  | 0 | 2  | 5 | 5 | 0 | 1  |

|   |   |    |   |   |   |   |
|---|---|----|---|---|---|---|
| 1 | 0 | 2  | 1 | 0 | 0 | 2 |
| 3 | 0 | 4  | 1 | 2 | 0 | 1 |
| 4 | 0 | 6  | 1 | 1 | 2 | 3 |
| 1 | 0 | 7  | 3 | 0 | 0 | 2 |
| 0 | 0 | 13 | 0 | 1 | 1 | 2 |
| 0 | 0 | 1  | 1 | 0 | 0 | 1 |
| 0 | 0 | 6  | 2 | 1 | 1 | 2 |
| 0 | 0 | 0  | 2 | 1 | 0 | 0 |
| 1 | 0 | 5  | 2 | 1 | 1 | 3 |
| 0 | 0 | 3  | 6 | 1 | 0 | 1 |
| 3 | 0 | 7  | 3 | 0 | 0 | 0 |
| 1 | 0 | 7  | 2 | 1 | 0 | 1 |
| 0 | 0 | 3  | 5 | 0 | 0 | 1 |
| 1 | 0 | 5  | 1 | 0 | 0 | 0 |
| 1 | 0 | 3  | 1 | 0 | 0 | 1 |
| 0 | 0 | 4  | 2 | 2 | 0 | 1 |
| 1 | 0 | 6  | 3 | 2 | 0 | 1 |
| 0 | 0 | 1  | 0 | 0 | 0 | 0 |
| 0 | 0 | 0  | 3 | 0 | 0 | 0 |
| 1 | 0 | 2  | 0 | 1 | 0 | 7 |
| 0 | 0 | 3  | 4 | 3 | 0 | 2 |
| 0 | 0 | 0  | 1 | 0 | 0 | 0 |
| 0 | 0 | 4  | 0 | 0 | 0 | 0 |
| 3 | 0 | 3  | 2 | 1 | 1 | 4 |
| 3 | 0 | 3  | 1 | 0 | 0 | 4 |
| 0 | 0 | 2  | 4 | 3 | 0 | 1 |
| 6 | 0 | 4  | 0 | 2 | 1 | 1 |
| 2 | 0 | 2  | 0 | 2 | 0 | 1 |
| 0 | 0 | 1  | 0 | 0 | 0 | 0 |
| 0 | 0 | 2  | 2 | 0 | 0 | 0 |
| 0 | 0 | 4  | 0 | 0 | 0 | 0 |
| 3 | 0 | 3  | 1 | 1 | 1 | 2 |
| 0 | 0 | 4  | 0 | 0 | 0 | 1 |
| 0 | 0 | 3  | 1 | 1 | 0 | 1 |
| 2 | 0 | 2  | 1 | 2 | 0 | 3 |
| 1 | 0 | 4  | 0 | 3 | 0 | 1 |
| 1 | 0 | 2  | 1 | 0 | 0 | 0 |
| 0 | 0 | 4  | 1 | 1 | 0 | 0 |
| 0 | 0 | 5  | 2 | 4 | 0 | 1 |
| 7 | 0 | 3  | 3 | 6 | 1 | 2 |
| 0 | 0 | 2  | 4 | 0 | 0 | 2 |
| 2 | 1 | 7  | 4 | 0 | 0 | 1 |
| 1 | 0 | 5  | 2 | 1 | 0 | 1 |
| 1 | 0 | 2  | 0 | 3 | 0 | 2 |
| 0 | 0 | 3  | 2 | 1 | 0 | 3 |
| 0 | 0 | 3  | 0 | 1 | 0 | 0 |
| 1 | 0 | 2  | 0 | 2 | 0 | 2 |
| 3 | 0 | 9  | 0 | 0 | 0 | 0 |
| 1 | 0 | 4  | 0 | 2 | 1 | 0 |
| 5 | 0 | 2  | 1 | 1 | 0 | 1 |
| 0 | 0 | 3  | 5 | 3 | 0 | 1 |
| 0 | 0 | 1  | 0 | 1 | 1 | 1 |
| 0 | 0 | 0  | 0 | 1 | 0 | 0 |
| 0 | 0 | 2  | 2 | 0 | 0 | 0 |
| 1 | 0 | 5  | 2 | 0 | 0 | 2 |
| 3 | 0 | 7  | 2 | 0 | 0 | 2 |
| 0 | 0 | 5  | 3 | 1 | 0 | 1 |
| 1 | 0 | 2  | 0 | 0 | 0 | 2 |
| 0 | 0 | 3  | 4 | 0 | 0 | 3 |

|         |       |         |         |         |        |         |
|---------|-------|---------|---------|---------|--------|---------|
| 0       | 0     | 2       | 4       | 0       | 0      | 1       |
| 1       | 0     | 3       | 3       | 3       | 0      | 2       |
| 0       | 0     | 9       | 3       | 0       | 0      | 3       |
| 0       | 0     | 5       | 0       | 1       | 0      | 4       |
| 0       | 0     | 3       | 4       | 0       | 0      | 0       |
| 1       | 0     | 4       | 0       | 2       | 0      | 1       |
| 3       | 0     | 5       | 1       | 1       | 0      | 0       |
| 2       | 0     | 10      | 0       | 0       | 0      | 0       |
| 0       | 0     | 4       | 2       | 1       | 0      | 3       |
| 1       | 0     | 0       | 4       | 1       | 0      | 13      |
| 1       | 0     | 4       | 1       | 1       | 0      | 0       |
| 1       | 0     | 5       | 2       | 2       | 0      | 2       |
| 0       | 10    | 0       | 0       | 0       | 0      | 0       |
| C_47    | D_15  | D_16    | D_17    | D_18    | D_36   | D_4     |
| UC      | UC    | UC      | UC      | UC      | UC     | UC      |
| 6567256 | 48689 | 7514364 | 1314450 | 2784650 | 169575 | 2239906 |
| 26      | 23    | 21      | 14      | 22      | 19     | 17      |
| 1.06    | 0.44  | -0.15   | -1.54   | 0.14    | -0.57  | -0.94   |

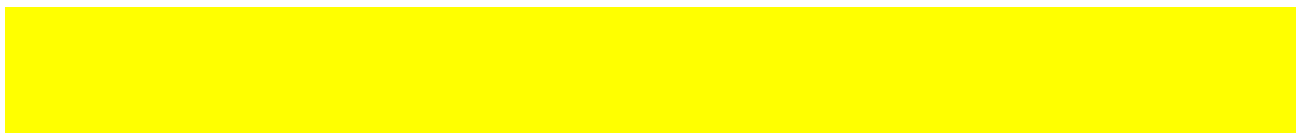

|         |         |         |        |         |         |         |
|---------|---------|---------|--------|---------|---------|---------|
| 0.76    | 0.66    | 0.21    | 0.23   | 0.59    | 0.57    | 0.88    |
| 7       | 10      | 24      | 22     | 11      | 16      | 5       |
| 1       | 1       | 1       | 1      | 1       | 1       | 1       |
| 15      | 16      | 17      | 18     | 19      | 20      | 21      |
| 15      | 16      | 17      | 18     | 19      | 20      | 21      |
| D_16    | D_17    | D_18    | D_36   | D_4     | E_47    | F_43    |
| UC      | UC      | UC      | UC     | UC      | UC      | UC      |
| 4032681 | 1739788 | 1227867 | 121631 | 2029037 | 1734052 | 1026638 |
| D_16    | D_17    | D_18    | D_36   | D_4     | E_47    | F_43    |
| 1531849 | 492299  | 434340  | 43427  | 587465  | 393385  | 494991  |
| 439203  | 147428  | 121333  | 5509   | 392427  | 82970   | 54523   |
| 146839  | 114004  | 91145   | 9645   | 124341  | 75041   | 41641   |
| 257462  | 91626   | 107193  | 4797   | 72204   | 67885   | 69737   |
| 216353  | 94252   | 142992  | 8299   | 141988  | 98228   | 76677   |
| 236351  | 141379  | 15073   | 9190   | 79097   | 221090  | 27687   |
| 96321   | 83961   | 47442   | 3216   | 84166   | 103902  | 23181   |
| 37646   | 20264   | 2086    | 2689   | 22024   | 125143  | 2006    |
| 123431  | 89451   | 13489   | 4537   | 31482   | 70550   | 13874   |
| 131928  | 36434   | 18771   | 3976   | 62023   | 32415   | 27676   |
| 54535   | 25861   | 12887   | 1522   | 18899   | 14010   | 27254   |
| 56370   | 31108   | 22005   | 2555   | 23168   | 33546   | 10282   |
| 38107   | 22508   | 7706    | 971    | 12274   | 20989   | 16434   |
| 51226   | 11534   | 21866   | 1929   | 12074   | 15421   | 11363   |
| 31921   | 26946   | 1105    | 878    | 11836   | 28940   | 6158    |
| 25011   | 19800   | 10553   | 1128   | 4026    | 13776   | 9179    |
| 20229   | 15122   | 1285    | 446    | 15501   | 24133   | 3570    |
| 46387   | 16987   | 6462    | 1895   | 18873   | 14832   | 6400    |
| 28660   | 20805   | 5612    | 488    | 16615   | 15649   | 3023    |

|       |       |       |     |       |       |      |
|-------|-------|-------|-----|-------|-------|------|
| 26135 | 12362 | 8659  | 600 | 32768 | 9752  | 7433 |
| 30117 | 7562  | 10288 | 817 | 13028 | 9166  | 3726 |
| 29467 | 7813  | 6300  | 967 | 7672  | 5987  | 4327 |
| 12100 | 8758  | 2850  | 234 | 19089 | 9506  | 6108 |
| 9499  | 7671  | 2046  | 566 | 28264 | 13140 | 808  |
| 7633  | 5119  | 1917  | 178 | 10212 | 12829 | 2190 |
| 20525 | 7101  | 7076  | 537 | 10933 | 9001  | 3253 |
| 20654 | 5910  | 7129  | 645 | 4277  | 5532  | 4049 |
| 18939 | 7643  | 1260  | 364 | 10771 | 10349 | 4272 |
| 12409 | 8787  | 2516  | 387 | 4527  | 7445  | 4213 |
| 9324  | 6564  | 5175  | 240 | 6960  | 3536  | 5401 |
| 12062 | 8726  | 3465  | 314 | 10061 | 9235  | 1715 |
| 11175 | 4139  | 5507  | 350 | 3526  | 4999  | 2298 |
| 4610  | 6155  | 1070  | 183 | 3160  | 13028 | 904  |
| 2976  | 6071  | 563   | 195 | 2703  | 12790 | 847  |
| 11404 | 8133  | 2321  | 358 | 4165  | 6853  | 3974 |
| 15472 | 4644  | 5836  | 512 | 6346  | 2996  | 1863 |
| 9964  | 6651  | 1732  | 412 | 11395 | 4826  | 2779 |
| 5458  | 5447  | 1530  | 86  | 5968  | 3812  | 2200 |
| 16089 | 2287  | 4079  | 147 | 2913  | 2967  | 1642 |
| 3617  | 1490  | 1957  | 326 | 4804  | 3747  | 695  |
| 8931  | 2670  | 3233  | 198 | 3231  | 2650  | 913  |
| 5684  | 4329  | 4867  | 184 | 5708  | 2571  | 2464 |
| 7925  | 2349  | 3039  | 188 | 2382  | 3028  | 1463 |
| 3066  | 2256  | 253   | 170 | 2355  | 6940  | 483  |
| 3568  | 2368  | 2760  | 171 | 3494  | 2855  | 645  |
| 4992  | 3193  | 1653  | 129 | 3229  | 2658  | 1824 |
| 4186  | 6725  | 1846  | 117 | 2667  | 2161  | 1155 |
| 6822  | 1728  | 1775  | 172 | 2486  | 2225  | 1273 |
| 383   | 435   | 64    | 31  | 80    | 7803  | 253  |
| 2173  | 2128  | 395   | 126 | 4109  | 8507  | 407  |
| 3862  | 1835  | 1788  | 180 | 1747  | 269   | 569  |
| 4225  | 2672  | 1062  | 140 | 2942  | 1870  | 521  |
| 5394  | 1923  | 1901  | 222 | 2882  | 1176  | 861  |
| 4437  | 2415  | 575   | 78  | 5573  | 3091  | 932  |
| 3705  | 2029  | 2316  | 76  | 1983  | 2787  | 324  |
| 451   | 461   | 60    | 39  | 227   | 6612  | 152  |
| 5246  | 2251  | 1394  | 113 | 1423  | 1483  | 484  |
| 2867  | 2062  | 913   | 111 | 1974  | 2234  | 308  |
| 3497  | 1840  | 978   | 111 | 2194  | 1143  | 1220 |
| 3517  | 1056  | 1417  | 59  | 898   | 686   | 600  |
| 2243  | 1912  | 843   | 93  | 836   | 901   | 674  |
| 2703  | 1636  | 1016  | 88  | 3769  | 1876  | 344  |
| 723   | 1288  | 51    | 23  | 386   | 2445  | 104  |
| 601   | 274   | 74    | 6   | 84    | 5997  | 46   |
| 2844  | 1145  | 590   | 114 | 457   | 925   | 2043 |
| 3331  | 1525  | 451   | 120 | 840   | 1480  | 376  |
| 798   | 1235  | 314   | 42  | 704   | 2074  | 215  |
| 1680  | 876   | 208   | 37  | 380   | 2037  | 207  |
| 1830  | 858   | 519   | 57  | 1216  | 1577  | 250  |
| 2905  | 960   | 452   | 16  | 2410  | 541   | 598  |
| 2014  | 1137  | 1058  | 56  | 805   | 582   | 500  |
| 2019  | 587   | 646   | 87  | 454   | 610   | 884  |
| 1377  | 1240  | 58    | 38  | 564   | 1348  | 248  |
| 3183  | 926   | 510   | 129 | 1034  | 977   | 430  |
| 1190  | 1295  | 434   | 52  | 959   | 1216  | 249  |
| 1462  | 931   | 519   | 117 | 502   | 175   | 263  |
| 3552  | 1119  | 1401  | 66  | 1446  | 784   | 264  |
| 1422  | 632   | 537   | 32  | 587   | 727   | 303  |



|      |      |     |     |     |      |     |
|------|------|-----|-----|-----|------|-----|
| 1746 | 770  | 606 | 124 | 499 | 460  | 304 |
| 1062 | 2057 | 577 | 98  | 547 | 296  | 382 |
| 1547 | 766  | 487 | 57  | 349 | 805  | 258 |
| 1060 | 836  | 617 | 79  | 582 | 578  | 409 |
| 1501 | 543  | 433 | 21  | 517 | 420  | 544 |
| 627  | 710  | 365 | 13  | 243 | 869  | 194 |
| 888  | 703  | 387 | 25  | 683 | 1038 | 100 |
| 1200 | 563  | 776 | 63  | 412 | 443  | 154 |
| 964  | 846  | 539 | 42  | 652 | 343  | 538 |
| 627  | 802  | 33  | 60  | 416 | 1028 | 104 |
| 925  | 615  | 124 | 42  | 430 | 664  | 304 |
| 1082 | 436  | 289 | 45  | 300 | 240  | 243 |
| 676  | 397  | 582 | 43  | 694 | 518  | 448 |
| 258  | 79   | 13  | 1   | 4   | 1448 | 37  |
| 859  | 406  | 528 | 23  | 268 | 648  | 103 |
| 1244 | 906  | 146 | 81  | 241 | 391  | 176 |
| 460  | 464  | 57  | 23  | 183 | 778  | 64  |
| 545  | 810  | 139 | 24  | 370 | 702  | 130 |
| 912  | 426  | 324 | 13  | 457 | 242  | 335 |
| 833  | 359  | 292 | 45  | 494 | 291  | 207 |
| 474  | 217  | 435 | 15  | 467 | 216  | 255 |
| 891  | 492  | 32  | 14  | 194 | 539  | 81  |
| 1137 | 179  | 324 | 50  | 811 | 185  | 47  |
| 522  | 481  | 278 | 33  | 502 | 375  | 195 |
| 556  | 387  | 344 | 20  | 218 | 183  | 247 |
| 418  | 760  | 149 | 22  | 399 | 250  | 84  |
| 528  | 485  | 91  | 25  | 253 | 370  | 136 |
| 508  | 312  | 59  | 41  | 292 | 529  | 42  |
| 536  | 324  | 213 | 43  | 357 | 215  | 87  |
| 599  | 331  | 221 | 11  | 509 | 349  | 128 |
| 412  | 327  | 106 | 26  | 127 | 429  | 73  |
| 829  | 245  | 88  | 23  | 188 | 575  | 49  |
| 723  | 411  | 142 | 40  | 585 | 503  | 117 |
| 653  | 253  | 248 | 15  | 345 | 207  | 145 |
| 495  | 167  | 252 | 18  | 656 | 131  | 36  |
| 771  | 252  | 106 | 21  | 163 | 374  | 70  |
| 252  | 200  | 234 | 19  | 109 | 234  | 43  |
| 421  | 205  | 216 | 12  | 116 | 109  | 136 |
| 505  | 191  | 215 | 14  | 293 | 307  | 63  |
| 212  | 520  | 39  | 12  | 102 | 275  | 92  |
| 212  | 520  | 39  | 12  | 102 | 275  | 92  |
| 548  | 228  | 185 | 10  | 410 | 129  | 43  |
| 399  | 198  | 207 | 39  | 125 | 137  | 75  |
| 327  | 218  | 156 | 15  | 234 | 126  | 114 |
| 534  | 230  | 129 | 33  | 190 | 85   | 13  |
| 352  | 248  | 102 | 2   | 657 | 295  | 40  |
| 56   | 116  | 10  | 1   | 21  | 698  | 11  |
| 231  | 244  | 116 | 9   | 117 | 132  | 118 |
| 242  | 149  | 247 | 13  | 130 | 94   | 71  |
| 372  | 201  | 162 | 29  | 180 | 123  | 85  |
| 346  | 155  | 158 | 9   | 213 | 112  | 42  |
| 343  | 86   | 134 | 8   | 78  | 75   | 44  |
| 192  | 80   | 102 | 1   | 89  | 404  | 53  |
| 299  | 198  | 97  | 16  | 197 | 174  | 41  |
| 277  | 315  | 100 | 3   | 106 | 106  | 62  |
| 283  | 102  | 174 | 20  | 123 | 95   | 43  |
| 117  | 163  | 41  | 6   | 63  | 209  | 23  |
| 342  | 225  | 86  | 8   | 187 | 88   | 78  |
| 161  | 108  | 69  | 1   | 63  | 169  | 77  |

|     |     |     |    |     |     |    |
|-----|-----|-----|----|-----|-----|----|
| 292 | 117 | 118 | 18 | 63  | 131 | 59 |
| 211 | 160 | 66  | 4  | 71  | 169 | 41 |
| 189 | 132 | 125 | 18 | 65  | 119 | 41 |
| 216 | 100 | 135 | 4  | 94  | 212 | 41 |
| 353 | 120 | 97  | 11 | 81  | 111 | 43 |
| 135 | 88  | 105 | 38 | 124 | 77  | 12 |
| 165 | 137 | 76  | 1  | 55  | 154 | 32 |
| 41  | 76  | 5   | 3  | 22  | 256 | 12 |
| 347 | 63  | 73  | 6  | 61  | 66  | 99 |
| 196 | 86  | 67  | 0  | 106 | 89  | 39 |
| 192 | 116 | 62  | 2  | 90  | 225 | 35 |
| 136 | 81  | 49  | 2  | 58  | 74  | 77 |
| 292 | 70  | 96  | 15 | 110 | 67  | 34 |
| 308 | 209 | 19  | 9  | 266 | 192 | 40 |
| 208 | 93  | 25  | 10 | 47  | 150 | 28 |
| 166 | 149 | 30  | 23 | 51  | 71  | 18 |
| 104 | 56  | 78  | 2  | 100 | 96  | 24 |
| 34  | 47  | 16  | 20 | 24  | 151 | 6  |
| 228 | 86  | 61  | 7  | 42  | 46  | 83 |
| 224 | 71  | 89  | 3  | 101 | 36  | 28 |
| 103 | 111 | 89  | 6  | 82  | 33  | 42 |
| 137 | 76  | 101 | 9  | 64  | 70  | 40 |
| 222 | 82  | 87  | 8  | 78  | 101 | 23 |
| 23  | 43  | 6   | 1  | 18  | 337 | 9  |
| 149 | 64  | 90  | 7  | 109 | 34  | 14 |
| 168 | 51  | 53  | 8  | 80  | 32  | 46 |
| 129 | 107 | 16  | 6  | 71  | 124 | 22 |
| 131 | 180 | 17  | 1  | 114 | 87  | 25 |
| 155 | 94  | 51  | 7  | 36  | 75  | 62 |
| 146 | 55  | 59  | 5  | 129 | 54  | 31 |
| 54  | 66  | 20  | 3  | 152 | 53  | 26 |
| 69  | 72  | 77  | 3  | 47  | 259 | 4  |
| 176 | 77  | 68  | 11 | 29  | 44  | 36 |
| 110 | 2   | 108 | 1  | 94  | 62  | 19 |
| 117 | 87  | 43  | 2  | 36  | 47  | 73 |
| 167 | 88  | 62  | 5  | 106 | 33  | 62 |
| 312 | 102 | 25  | 4  | 198 | 85  | 29 |
| 134 | 56  | 14  | 3  | 80  | 247 | 6  |
| 219 | 38  | 58  | 3  | 57  | 56  | 30 |
| 195 | 87  | 39  | 6  | 14  | 4   | 20 |
| 90  | 82  | 71  | 8  | 121 | 100 | 39 |
| 145 | 38  | 70  | 11 | 49  | 52  | 9  |
| 100 | 56  | 76  | 9  | 23  | 7   | 16 |
| 121 | 40  | 46  | 4  | 36  | 52  | 42 |
| 106 | 82  | 8   | 2  | 50  | 101 | 17 |
| 139 | 60  | 35  | 3  | 19  | 9   | 23 |
| 110 | 103 | 18  | 3  | 53  | 134 | 13 |
| 117 | 66  | 37  | 2  | 50  | 21  | 71 |
| 116 | 49  | 28  | 10 | 34  | 55  | 20 |
| 101 | 81  | 6   | 2  | 48  | 96  | 16 |
| 107 | 31  | 18  | 5  | 22  | 6   | 18 |
| 82  | 171 | 24  | 2  | 54  | 41  | 21 |
| 97  | 114 | 42  | 0  | 44  | 79  | 28 |
| 37  | 48  | 65  | 0  | 1   | 10  | 1  |
| 92  | 90  | 7   | 9  | 63  | 67  | 11 |
| 136 | 89  | 30  | 6  | 99  | 54  | 25 |
| 118 | 60  | 23  | 5  | 54  | 31  | 25 |
| 133 | 55  | 48  | 4  | 69  | 34  | 42 |
| 63  | 61  | 35  | 1  | 39  | 72  | 16 |

|     |    |    |    |     |     |    |
|-----|----|----|----|-----|-----|----|
| 61  | 37 | 8  | 1  | 37  | 330 | 4  |
| 139 | 40 | 55 | 8  | 23  | 58  | 29 |
| 109 | 52 | 44 | 10 | 38  | 36  | 10 |
| 142 | 70 | 26 | 0  | 11  | 29  | 23 |
| 97  | 38 | 35 | 3  | 72  | 55  | 9  |
| 92  | 75 | 25 | 6  | 70  | 27  | 43 |
| 90  | 28 | 60 | 4  | 59  | 47  | 8  |
| 147 | 54 | 38 | 0  | 50  | 42  | 29 |
| 75  | 47 | 10 | 1  | 24  | 52  | 4  |
| 62  | 34 | 49 | 4  | 12  | 8   | 12 |
| 101 | 29 | 23 | 5  | 68  | 33  | 17 |
| 132 | 51 | 37 | 2  | 72  | 39  | 11 |
| 69  | 14 | 58 | 3  | 57  | 25  | 15 |
| 112 | 21 | 31 | 4  | 17  | 65  | 22 |
| 100 | 33 | 25 | 7  | 38  | 39  | 14 |
| 121 | 77 | 34 | 4  | 135 | 30  | 10 |
| 40  | 48 | 3  | 13 | 37  | 36  | 14 |
| 123 | 38 | 54 | 7  | 23  | 22  | 7  |
| 78  | 47 | 21 | 2  | 41  | 61  | 20 |
| 89  | 50 | 37 | 0  | 82  | 38  | 17 |
| 68  | 62 | 34 | 0  | 41  | 48  | 19 |
| 100 | 44 | 21 | 10 | 36  | 42  | 10 |
| 29  | 13 | 0  | 0  | 2   | 96  | 0  |
| 59  | 22 | 30 | 3  | 31  | 30  | 4  |
| 53  | 13 | 16 | 0  | 62  | 108 | 5  |
| 110 | 41 | 27 | 4  | 29  | 16  | 22 |
| 62  | 28 | 30 | 0  | 32  | 41  | 7  |
| 127 | 35 | 38 | 1  | 18  | 16  | 6  |
| 54  | 41 | 15 | 5  | 13  | 3   | 7  |
| 43  | 21 | 28 | 1  | 23  | 28  | 17 |
| 53  | 23 | 31 | 3  | 19  | 19  | 16 |
| 49  | 35 | 36 | 5  | 33  | 28  | 10 |
| 51  | 25 | 23 | 3  | 28  | 24  | 13 |
| 84  | 24 | 43 | 0  | 25  | 19  | 10 |
| 48  | 46 | 8  | 3  | 54  | 45  | 10 |
| 87  | 22 | 34 | 2  | 39  | 34  | 24 |
| 14  | 19 | 0  | 1  | 8   | 85  | 2  |
| 41  | 34 | 34 | 0  | 11  | 19  | 8  |
| 54  | 50 | 13 | 2  | 9   | 35  | 11 |
| 71  | 4  | 29 | 4  | 19  | 28  | 18 |
| 30  | 20 | 31 | 1  | 12  | 22  | 6  |
| 21  | 28 | 4  | 0  | 32  | 30  | 0  |
| 53  | 39 | 7  | 1  | 35  | 25  | 7  |
| 57  | 29 | 20 | 1  | 15  | 24  | 6  |
| 52  | 26 | 8  | 5  | 5   | 4   | 10 |
| 41  | 32 | 14 | 2  | 15  | 14  | 6  |
| 42  | 23 | 4  | 1  | 47  | 57  | 1  |
| 34  | 11 | 11 | 0  | 37  | 35  | 1  |
| 34  | 11 | 11 | 0  | 37  | 35  | 1  |
| 42  | 15 | 10 | 1  | 6   | 3   | 7  |
| 55  | 14 | 20 | 1  | 23  | 21  | 9  |
| 51  | 12 | 14 | 1  | 17  | 49  | 5  |
| 45  | 31 | 8  | 3  | 0   | 4   | 5  |
| 29  | 16 | 12 | 0  | 19  | 48  | 6  |
| 44  | 28 | 26 | 0  | 51  | 21  | 4  |
| 51  | 29 | 4  | 1  | 13  | 8   | 17 |
| 54  | 14 | 10 | 3  | 6   | 27  | 3  |
| 32  | 17 | 27 | 0  | 8   | 29  | 4  |
| 58  | 14 | 2  | 2  | 60  | 27  | 2  |

|    |    |    |   |    |    |    |
|----|----|----|---|----|----|----|
| 95 | 7  | 59 | 0 | 16 | 17 | 13 |
| 21 | 33 | 13 | 2 | 5  | 37 | 5  |
| 69 | 13 | 33 | 0 | 19 | 14 | 5  |
| 5  | 2  | 0  | 0 | 0  | 61 | 0  |
| 45 | 21 | 15 | 0 | 20 | 22 | 8  |
| 31 | 40 | 1  | 0 | 18 | 23 | 11 |
| 30 | 22 | 16 | 0 | 14 | 13 | 8  |
| 60 | 15 | 22 | 0 | 8  | 7  | 15 |
| 30 | 40 | 1  | 0 | 17 | 21 | 10 |
| 50 | 29 | 13 | 4 | 10 | 7  | 10 |
| 41 | 9  | 32 | 3 | 6  | 17 | 7  |
| 38 | 21 | 14 | 3 | 13 | 10 | 3  |
| 36 | 14 | 13 | 1 | 5  | 11 | 11 |
| 8  | 1  | 1  | 0 | 2  | 73 | 1  |
| 19 | 9  | 12 | 7 | 11 | 16 | 8  |
| 57 | 10 | 14 | 3 | 15 | 14 | 4  |
| 33 | 6  | 20 | 0 | 12 | 11 | 3  |
| 23 | 15 | 11 | 3 | 8  | 3  | 3  |
| 36 | 14 | 15 | 1 | 42 | 29 | 7  |
| 8  | 8  | 0  | 0 | 3  | 36 | 0  |
| 33 | 10 | 9  | 0 | 14 | 12 | 3  |
| 22 | 29 | 2  | 1 | 22 | 18 | 3  |
| 1  | 0  | 0  | 7 | 0  | 0  | 0  |
| 29 | 12 | 16 | 0 | 9  | 15 | 14 |
| 24 | 16 | 13 | 2 | 10 | 11 | 17 |
| 40 | 9  | 12 | 0 | 26 | 8  | 3  |
| 39 | 10 | 12 | 5 | 6  | 2  | 1  |
| 16 | 23 | 26 | 4 | 8  | 5  | 12 |
| 19 | 18 | 9  | 3 | 9  | 4  | 4  |
| 23 | 12 | 15 | 2 | 19 | 11 | 4  |
| 18 | 23 | 10 | 4 | 0  | 4  | 14 |
| 38 | 11 | 22 | 2 | 26 | 10 | 10 |
| 21 | 27 | 2  | 1 | 21 | 14 | 3  |
| 7  | 12 | 5  | 2 | 5  | 4  | 3  |
| 12 | 26 | 1  | 0 | 5  | 14 | 3  |
| 7  | 13 | 0  | 1 | 16 | 34 | 3  |
| 17 | 27 | 12 | 0 | 32 | 6  | 5  |
| 35 | 8  | 20 | 1 | 19 | 6  | 5  |
| 11 | 16 | 9  | 2 | 10 | 21 | 5  |
| 6  | 7  | 2  | 4 | 6  | 12 | 0  |
| 20 | 17 | 9  | 3 | 10 | 3  | 3  |
| 28 | 21 | 1  | 3 | 11 | 34 | 3  |
| 48 | 19 | 8  | 0 | 13 | 10 | 10 |
| 22 | 17 | 15 | 0 | 14 | 18 | 0  |
| 17 | 17 | 16 | 0 | 13 | 12 | 6  |
| 20 | 7  | 5  | 3 | 5  | 4  | 0  |
| 20 | 12 | 8  | 2 | 5  | 0  | 5  |
| 16 | 10 | 11 | 0 | 7  | 14 | 0  |
| 30 | 7  | 8  | 0 | 11 | 17 | 0  |
| 20 | 23 | 21 | 3 | 6  | 2  | 7  |
| 23 | 22 | 3  | 2 | 36 | 11 | 5  |
| 9  | 3  | 11 | 3 | 25 | 14 | 1  |
| 10 | 21 | 19 | 0 | 8  | 10 | 9  |
| 7  | 20 | 7  | 1 | 6  | 6  | 8  |
| 14 | 11 | 9  | 3 | 19 | 4  | 2  |
| 18 | 27 | 6  | 0 | 11 | 13 | 3  |
| 24 | 3  | 2  | 1 | 18 | 6  | 11 |
| 11 | 10 | 0  | 1 | 13 | 33 | 2  |
| 5  | 28 | 1  | 1 | 20 | 19 | 5  |

|    |    |    |   |    |    |    |
|----|----|----|---|----|----|----|
| 21 | 8  | 9  | 0 | 3  | 8  | 2  |
| 33 | 9  | 3  | 1 | 6  | 10 | 4  |
| 34 | 6  | 6  | 0 | 8  | 5  | 5  |
| 36 | 6  | 18 | 0 | 13 | 8  | 2  |
| 31 | 9  | 17 | 0 | 13 | 8  | 2  |
| 18 | 12 | 21 | 0 | 4  | 21 | 3  |
| 23 | 15 | 9  | 2 | 1  | 12 | 2  |
| 12 | 22 | 4  | 1 | 8  | 14 | 2  |
| 25 | 12 | 8  | 0 | 19 | 9  | 2  |
| 17 | 5  | 6  | 1 | 1  | 0  | 5  |
| 29 | 12 | 14 | 0 | 4  | 5  | 3  |
| 22 | 13 | 4  | 1 | 10 | 3  | 0  |
| 16 | 22 | 8  | 3 | 2  | 0  | 3  |
| 15 | 12 | 8  | 0 | 3  | 12 | 6  |
| 25 | 2  | 6  | 0 | 4  | 9  | 8  |
| 17 | 5  | 11 | 0 | 2  | 3  | 10 |
| 15 | 7  | 5  | 0 | 17 | 5  | 3  |
| 22 | 5  | 4  | 1 | 5  | 2  | 7  |
| 11 | 9  | 1  | 0 | 5  | 25 | 1  |
| 13 | 7  | 1  | 0 | 4  | 7  | 3  |
| 12 | 12 | 0  | 0 | 12 | 18 | 3  |
| 33 | 7  | 14 | 1 | 5  | 10 | 2  |
| 17 | 4  | 7  | 0 | 5  | 9  | 3  |
| 13 | 12 | 9  | 2 | 9  | 4  | 3  |
| 1  | 1  | 1  | 0 | 0  | 29 | 4  |
| 30 | 6  | 6  | 0 | 8  | 6  | 4  |
| 13 | 14 | 5  | 1 | 15 | 7  | 9  |
| 13 | 11 | 10 | 0 | 5  | 7  | 5  |
| 19 | 6  | 8  | 1 | 8  | 8  | 6  |
| 15 | 11 | 10 | 2 | 9  | 6  | 2  |
| 7  | 11 | 6  | 0 | 19 | 3  | 5  |
| 26 | 3  | 6  | 2 | 6  | 7  | 2  |
| 24 | 5  | 7  | 0 | 12 | 5  | 2  |
| 5  | 10 | 1  | 2 | 7  | 6  | 3  |
| 26 | 6  | 4  | 0 | 1  | 6  | 1  |
| 7  | 11 | 7  | 1 | 5  | 8  | 2  |
| 13 | 11 | 5  | 2 | 5  | 7  | 3  |
| 12 | 4  | 8  | 0 | 6  | 21 | 0  |
| 9  | 6  | 10 | 0 | 15 | 7  | 5  |
| 4  | 10 | 1  | 0 | 3  | 17 | 0  |
| 5  | 6  | 5  | 0 | 8  | 7  | 3  |
| 7  | 6  | 3  | 0 | 14 | 4  | 0  |
| 8  | 5  | 1  | 1 | 7  | 4  | 1  |
| 18 | 8  | 5  | 1 | 9  | 2  | 5  |
| 14 | 3  | 1  | 1 | 7  | 12 | 0  |
| 11 | 5  | 7  | 0 | 7  | 3  | 0  |
| 15 | 1  | 2  | 0 | 10 | 10 | 5  |
| 20 | 6  | 1  | 0 | 10 | 9  | 2  |
| 7  | 2  | 2  | 0 | 1  | 4  | 6  |
| 12 | 7  | 4  | 2 | 7  | 7  | 10 |
| 21 | 4  | 1  | 0 | 8  | 4  | 6  |
| 11 | 4  | 4  | 2 | 4  | 4  | 3  |
| 3  | 3  | 0  | 0 | 7  | 13 | 3  |
| 4  | 3  | 0  | 0 | 2  | 19 | 1  |
| 24 | 5  | 3  | 0 | 3  | 5  | 1  |
| 14 | 5  | 9  | 0 | 4  | 3  | 0  |
| 3  | 2  | 5  | 0 | 1  | 2  | 6  |
| 14 | 3  | 8  | 0 | 3  | 6  | 0  |
| 9  | 1  | 3  | 0 | 4  | 4  | 0  |

|    |    |   |   |    |    |   |
|----|----|---|---|----|----|---|
| 11 | 6  | 5 | 0 | 8  | 3  | 6 |
| 7  | 6  | 1 | 0 | 2  | 9  | 0 |
| 6  | 2  | 3 | 0 | 1  | 2  | 2 |
| 21 | 5  | 3 | 0 | 1  | 7  | 2 |
| 14 | 2  | 4 | 0 | 6  | 3  | 3 |
| 9  | 9  | 1 | 0 | 2  | 2  | 4 |
| 4  | 5  | 5 | 1 | 11 | 3  | 4 |
| 5  | 2  | 1 | 1 | 30 | 2  | 0 |
| 3  | 3  | 4 | 1 | 5  | 2  | 2 |
| 12 | 5  | 5 | 1 | 4  | 0  | 0 |
| 5  | 3  | 3 | 0 | 1  | 4  | 3 |
| 7  | 2  | 5 | 0 | 7  | 5  | 2 |
| 9  | 1  | 2 | 3 | 12 | 5  | 0 |
| 5  | 6  | 1 | 0 | 4  | 6  | 1 |
| 11 | 10 | 6 | 0 | 4  | 6  | 3 |
| 4  | 7  | 2 | 0 | 6  | 9  | 0 |
| 3  | 8  | 7 | 0 | 1  | 1  | 1 |
| 8  | 4  | 1 | 2 | 2  | 2  | 0 |
| 4  | 4  | 1 | 0 | 4  | 3  | 2 |
| 10 | 5  | 0 | 1 | 3  | 14 | 0 |
| 12 | 0  | 2 | 0 | 7  | 3  | 1 |
| 2  | 9  | 5 | 0 | 5  | 10 | 2 |
| 6  | 4  | 0 | 0 | 16 | 3  | 0 |
| 13 | 1  | 7 | 0 | 5  | 6  | 1 |
| 8  | 1  | 5 | 0 | 10 | 2  | 1 |
| 18 | 6  | 2 | 1 | 3  | 10 | 5 |
| 11 | 5  | 0 | 0 | 4  | 5  | 1 |
| 9  | 4  | 6 | 1 | 2  | 0  | 2 |
| 8  | 9  | 0 | 2 | 23 | 7  | 1 |
| 5  | 5  | 1 | 0 | 3  | 3  | 1 |
| 9  | 3  | 1 | 0 | 1  | 3  | 1 |
| 7  | 3  | 4 | 0 | 3  | 1  | 3 |
| 14 | 7  | 2 | 0 | 8  | 4  | 4 |
| 8  | 0  | 1 | 0 | 4  | 8  | 0 |
| 8  | 2  | 2 | 0 | 0  | 4  | 0 |
| 2  | 2  | 2 | 0 | 1  | 3  | 1 |
| 7  | 7  | 0 | 0 | 7  | 2  | 0 |
| 2  | 4  | 0 | 0 | 0  | 16 | 0 |
| 1  | 0  | 0 | 0 | 0  | 14 | 0 |
| 4  | 4  | 0 | 0 | 2  | 7  | 0 |
| 11 | 2  | 8 | 0 | 0  | 10 | 1 |
| 3  | 5  | 2 | 1 | 2  | 0  | 1 |
| 5  | 3  | 1 | 0 | 1  | 2  | 3 |
| 6  | 8  | 3 | 0 | 2  | 2  | 1 |
| 1  | 2  | 1 | 0 | 1  | 16 | 0 |
| 2  | 5  | 1 | 0 | 1  | 3  | 1 |
| 5  | 3  | 1 | 1 | 5  | 2  | 0 |
| 3  | 6  | 0 | 0 | 3  | 8  | 0 |
| 17 | 5  | 3 | 0 | 1  | 0  | 1 |
| 2  | 2  | 1 | 1 | 2  | 4  | 2 |
| 9  | 2  | 7 | 1 | 1  | 5  | 0 |
| 0  | 3  | 0 | 0 | 2  | 18 | 0 |
| 6  | 1  | 3 | 1 | 0  | 10 | 1 |
| 9  | 2  | 2 | 0 | 7  | 3  | 2 |
| 9  | 1  | 4 | 0 | 1  | 4  | 2 |
| 2  | 5  | 3 | 0 | 5  | 6  | 1 |
| 1  | 2  | 0 | 0 | 0  | 10 | 0 |
| 11 | 9  | 0 | 0 | 5  | 5  | 2 |
| 7  | 1  | 6 | 0 | 2  | 2  | 2 |

|    |   |   |   |    |   |   |
|----|---|---|---|----|---|---|
| 3  | 2 | 3 | 0 | 0  | 5 | 0 |
| 0  | 2 | 0 | 0 | 7  | 7 | 1 |
| 15 | 3 | 6 | 0 | 4  | 3 | 1 |
| 6  | 2 | 2 | 0 | 0  | 6 | 1 |
| 4  | 5 | 1 | 0 | 1  | 3 | 1 |
| 5  | 3 | 2 | 0 | 6  | 7 | 1 |
| 3  | 2 | 0 | 2 | 0  | 0 | 0 |
| 1  | 0 | 0 | 1 | 0  | 6 | 1 |
| 3  | 3 | 1 | 0 | 1  | 1 | 1 |
| 4  | 3 | 4 | 0 | 3  | 4 | 2 |
| 14 | 2 | 3 | 0 | 2  | 2 | 0 |
| 9  | 3 | 2 | 0 | 1  | 2 | 0 |
| 2  | 2 | 0 | 0 | 1  | 1 | 1 |
| 2  | 5 | 0 | 0 | 1  | 6 | 1 |
| 5  | 1 | 4 | 0 | 3  | 3 | 1 |
| 7  | 3 | 2 | 0 | 2  | 0 | 2 |
| 6  | 2 | 7 | 0 | 3  | 2 | 2 |
| 7  | 5 | 2 | 1 | 10 | 3 | 2 |
| 7  | 5 | 0 | 0 | 3  | 0 | 0 |
| 5  | 2 | 1 | 2 | 1  | 2 | 1 |
| 1  | 2 | 0 | 0 | 6  | 2 | 0 |
| 10 | 5 | 2 | 0 | 0  | 3 | 0 |
| 3  | 3 | 0 | 0 | 6  | 4 | 0 |
| 10 | 5 | 5 | 0 | 4  | 0 | 1 |
| 12 | 1 | 4 | 1 | 2  | 2 | 1 |
| 2  | 5 | 5 | 0 | 1  | 0 | 2 |
| 2  | 1 | 0 | 0 | 2  | 4 | 3 |
| 4  | 1 | 2 | 0 | 1  | 1 | 1 |
| 6  | 1 | 1 | 2 | 3  | 2 | 2 |
| 7  | 3 | 0 | 0 | 2  | 1 | 2 |
| 13 | 0 | 1 | 1 | 2  | 3 | 2 |
| 1  | 1 | 0 | 0 | 1  | 6 | 0 |
| 6  | 2 | 1 | 1 | 2  | 1 | 1 |
| 0  | 2 | 1 | 0 | 0  | 3 | 1 |
| 5  | 2 | 1 | 1 | 3  | 0 | 0 |
| 3  | 6 | 1 | 0 | 1  | 1 | 1 |
| 7  | 3 | 0 | 0 | 0  | 1 | 0 |
| 7  | 2 | 1 | 0 | 1  | 4 | 0 |
| 3  | 5 | 0 | 0 | 1  | 4 | 1 |
| 5  | 1 | 0 | 0 | 0  | 2 | 0 |
| 3  | 1 | 0 | 0 | 1  | 6 | 0 |
| 4  | 2 | 2 | 0 | 1  | 2 | 0 |
| 6  | 3 | 2 | 0 | 1  | 4 | 0 |
| 1  | 0 | 0 | 0 | 0  | 1 | 0 |
| 0  | 3 | 0 | 0 | 0  | 6 | 0 |
| 2  | 0 | 1 | 0 | 7  | 1 | 0 |
| 3  | 4 | 3 | 0 | 2  | 3 | 1 |
| 0  | 1 | 0 | 0 | 0  | 3 | 1 |
| 4  | 0 | 0 | 0 | 0  | 6 | 0 |
| 3  | 2 | 1 | 1 | 4  | 1 | 1 |
| 3  | 1 | 0 | 0 | 4  | 1 | 0 |
| 2  | 4 | 3 | 0 | 1  | 1 | 1 |
| 4  | 0 | 2 | 1 | 1  | 2 | 0 |
| 2  | 0 | 2 | 0 | 1  | 0 | 2 |
| 1  | 0 | 0 | 0 | 0  | 4 | 0 |
| 2  | 2 | 0 | 0 | 0  | 4 | 0 |
| 4  | 0 | 0 | 0 | 0  | 0 | 0 |
| 3  | 1 | 1 | 1 | 2  | 1 | 0 |
| 4  | 0 | 0 | 0 | 1  | 4 | 0 |

|    |   |   |   |    |   |   |
|----|---|---|---|----|---|---|
| 3  | 1 | 1 | 0 | 1  | 0 | 1 |
| 2  | 1 | 2 | 0 | 3  | 1 | 0 |
| 4  | 0 | 3 | 0 | 1  | 1 | 0 |
| 2  | 1 | 0 | 0 | 0  | 2 | 0 |
| 4  | 1 | 1 | 0 | 0  | 4 | 0 |
| 5  | 2 | 4 | 0 | 1  | 3 | 0 |
| 3  | 3 | 6 | 1 | 2  | 1 | 1 |
| 2  | 4 | 0 | 0 | 2  | 1 | 0 |
| 7  | 4 | 0 | 0 | 1  | 2 | 0 |
| 5  | 2 | 1 | 0 | 1  | 2 | 1 |
| 2  | 0 | 3 | 0 | 2  | 1 | 0 |
| 3  | 2 | 1 | 0 | 3  | 0 | 0 |
| 3  | 0 | 1 | 0 | 0  | 2 | 1 |
| 2  | 0 | 2 | 0 | 2  | 1 | 0 |
| 9  | 0 | 0 | 0 | 0  | 1 | 0 |
| 4  | 0 | 2 | 1 | 0  | 2 | 3 |
| 2  | 1 | 1 | 0 | 1  | 2 | 1 |
| 3  | 5 | 3 | 0 | 1  | 1 | 0 |
| 1  | 0 | 1 | 1 | 1  | 3 | 1 |
| 0  | 0 | 1 | 0 | 0  | 1 | 1 |
| 2  | 2 | 0 | 0 | 0  | 2 | 0 |
| 5  | 2 | 0 | 0 | 2  | 0 | 0 |
| 7  | 2 | 0 | 0 | 2  | 1 | 0 |
| 5  | 3 | 1 | 0 | 1  | 1 | 0 |
| 2  | 0 | 0 | 0 | 2  | 1 | 0 |
| 3  | 4 | 0 | 0 | 3  | 2 | 0 |
| 2  | 4 | 0 | 0 | 1  | 1 | 1 |
| 3  | 3 | 3 | 0 | 2  | 2 | 1 |
| 9  | 3 | 0 | 0 | 3  | 2 | 0 |
| 5  | 0 | 1 | 0 | 4  | 2 | 0 |
| 3  | 4 | 0 | 0 | 0  | 3 | 1 |
| 4  | 0 | 2 | 0 | 1  | 0 | 0 |
| 5  | 1 | 1 | 0 | 0  | 1 | 0 |
| 10 | 0 | 0 | 0 | 0  | 0 | 0 |
| 4  | 2 | 1 | 0 | 3  | 0 | 0 |
| 0  | 4 | 1 | 0 | 13 | 0 | 0 |
| 4  | 1 | 1 | 0 | 0  | 1 | 0 |
| 5  | 2 | 2 | 0 | 2  | 0 | 2 |

|         |         |         |        |         |         |         |
|---------|---------|---------|--------|---------|---------|---------|
| 0.76    | 0.66    | 0.21    | 0.23   | 0.59    | 0.57    | 0.88    |
| 7       | 10      | 24      | 22     | 11      | 16      | 5       |
| 1       | 1       | 1       | 1      | 1       | 1       | 1       |
| 15      | 16      | 17      | 18     | 19      | 20      | 21      |
| 15      | 16      | 17      | 18     | 19      | 20      | 21      |
| D_16    | D_17    | D_18    | D_36   | D_4     | E_47    | F_43    |
| UC      | UC      | UC      | UC     | UC      | UC      | UC      |
| 4032681 | 1739788 | 1227867 | 121631 | 2029037 | 1734052 | 1026638 |
| UC      | UC      | UC      | UC     | UC      | UC      | UC      |
| 1531849 | 492299  | 434340  | 43427  | 587465  | 393385  | 494991  |
| 439203  | 147428  | 121333  | 5509   | 392427  | 82970   | 54523   |
| 146839  | 114004  | 91145   | 9645   | 124341  | 75041   | 41641   |
| 257462  | 91626   | 107193  | 4797   | 72204   | 67885   | 69737   |
| 216353  | 94252   | 142992  | 8299   | 141988  | 98228   | 76677   |



|        |        |       |      |       |        |       |
|--------|--------|-------|------|-------|--------|-------|
| 236351 | 141379 | 15073 | 9190 | 79097 | 221090 | 27687 |
| 96321  | 83961  | 47442 | 3216 | 84166 | 103902 | 23181 |
| 37646  | 20264  | 2086  | 2689 | 22024 | 125143 | 2006  |
| 123431 | 89451  | 13489 | 4537 | 31482 | 70550  | 13874 |
| 131928 | 36434  | 18771 | 3976 | 62023 | 32415  | 27676 |
| 54535  | 25861  | 12887 | 1522 | 18899 | 14010  | 27254 |
| 56370  | 31108  | 22005 | 2555 | 23168 | 33546  | 10282 |
| 38107  | 22508  | 7706  | 971  | 12274 | 20989  | 16434 |
| 51226  | 11534  | 21866 | 1929 | 12074 | 15421  | 11363 |
| 31921  | 26946  | 1105  | 878  | 11836 | 28940  | 6158  |
| 25011  | 19800  | 10553 | 1128 | 4026  | 13776  | 9179  |
| 20229  | 15122  | 1285  | 446  | 15501 | 24133  | 3570  |
| 46387  | 16987  | 6462  | 1895 | 18873 | 14832  | 6400  |
| 28660  | 20805  | 5612  | 488  | 16615 | 15649  | 3023  |
| 26135  | 12362  | 8659  | 600  | 32768 | 9752   | 7433  |
| 30117  | 7562   | 10288 | 817  | 13028 | 9166   | 3726  |
| 29467  | 7813   | 6300  | 967  | 7672  | 5987   | 4327  |
| 12100  | 8758   | 2850  | 234  | 19089 | 9506   | 6108  |
| 9499   | 7671   | 2046  | 566  | 28264 | 13140  | 808   |
| 7633   | 5119   | 1917  | 178  | 10212 | 12829  | 2190  |
| 20525  | 7101   | 7076  | 537  | 10933 | 9001   | 3253  |
| 20654  | 5910   | 7129  | 645  | 4277  | 5532   | 4049  |
| 18939  | 7643   | 1260  | 364  | 10771 | 10349  | 4272  |
| 12409  | 8787   | 2516  | 387  | 4527  | 7445   | 4213  |
| 9324   | 6564   | 5175  | 240  | 6960  | 3536   | 5401  |
| 12062  | 8726   | 3465  | 314  | 10061 | 9235   | 1715  |
| 11175  | 4139   | 5507  | 350  | 3526  | 4999   | 2298  |
| 4610   | 6155   | 1070  | 183  | 3160  | 13028  | 904   |
| 2976   | 6071   | 563   | 195  | 2703  | 12790  | 847   |
| 11404  | 8133   | 2321  | 358  | 4165  | 6853   | 3974  |
| 15472  | 4644   | 5836  | 512  | 6346  | 2996   | 1863  |
| 9964   | 6651   | 1732  | 412  | 11395 | 4826   | 2779  |
| 5458   | 5447   | 1530  | 86   | 5968  | 3812   | 2200  |
| 16089  | 2287   | 4079  | 147  | 2913  | 2967   | 1642  |
| 3617   | 1490   | 1957  | 326  | 4804  | 3747   | 695   |
| 8931   | 2670   | 3233  | 198  | 3231  | 2650   | 913   |
| 5684   | 4329   | 4867  | 184  | 5708  | 2571   | 2464  |
| 7925   | 2349   | 3039  | 188  | 2382  | 3028   | 1463  |
| 3066   | 2256   | 253   | 170  | 2355  | 6940   | 483   |
| 3568   | 2368   | 2760  | 171  | 3494  | 2855   | 645   |
| 4992   | 3193   | 1653  | 129  | 3229  | 2658   | 1824  |
| 4186   | 6725   | 1846  | 117  | 2667  | 2161   | 1155  |
| 6822   | 1728   | 1775  | 172  | 2486  | 2225   | 1273  |
| 383    | 435    | 64    | 31   | 80    | 7803   | 253   |
| 2173   | 2128   | 395   | 126  | 4109  | 8507   | 407   |
| 3862   | 1835   | 1788  | 180  | 1747  | 269    | 569   |
| 4225   | 2672   | 1062  | 140  | 2942  | 1870   | 521   |
| 5394   | 1923   | 1901  | 222  | 2882  | 1176   | 861   |
| 4437   | 2415   | 575   | 78   | 5573  | 3091   | 932   |
| 3705   | 2029   | 2316  | 76   | 1983  | 2787   | 324   |
| 451    | 461    | 60    | 39   | 227   | 6612   | 152   |
| 5246   | 2251   | 1394  | 113  | 1423  | 1483   | 484   |
| 2867   | 2062   | 913   | 111  | 1974  | 2234   | 308   |
| 3497   | 1840   | 978   | 111  | 2194  | 1143   | 1220  |
| 3517   | 1056   | 1417  | 59   | 898   | 686    | 600   |
| 2243   | 1912   | 843   | 93   | 836   | 901    | 674   |
| 2703   | 1636   | 1016  | 88   | 3769  | 1876   | 344   |
| 723    | 1288   | 51    | 23   | 386   | 2445   | 104   |
| 601    | 274    | 74    | 6    | 84    | 5997   | 46    |

|      |      |      |     |      |      |      |
|------|------|------|-----|------|------|------|
| 2844 | 1145 | 590  | 114 | 457  | 925  | 2043 |
| 3331 | 1525 | 451  | 120 | 840  | 1480 | 376  |
| 798  | 1235 | 314  | 42  | 704  | 2074 | 215  |
| 1680 | 876  | 208  | 37  | 380  | 2037 | 207  |
| 1830 | 858  | 519  | 57  | 1216 | 1577 | 250  |
| 2905 | 960  | 452  | 16  | 2410 | 541  | 598  |
| 2014 | 1137 | 1058 | 56  | 805  | 582  | 500  |
| 2019 | 587  | 646  | 87  | 454  | 610  | 884  |
| 1377 | 1240 | 58   | 38  | 564  | 1348 | 248  |
| 3183 | 926  | 510  | 129 | 1034 | 977  | 430  |
| 1190 | 1295 | 434  | 52  | 959  | 1216 | 249  |
| 1462 | 931  | 519  | 117 | 502  | 175  | 263  |
| 3552 | 1119 | 1401 | 66  | 1446 | 784  | 264  |
| 1422 | 632  | 537  | 32  | 587  | 727  | 303  |
| 1746 | 770  | 606  | 124 | 499  | 460  | 304  |
| 1062 | 2057 | 577  | 98  | 547  | 296  | 382  |
| 1547 | 766  | 487  | 57  | 349  | 805  | 258  |
| 1060 | 836  | 617  | 79  | 582  | 578  | 409  |
| 1501 | 543  | 433  | 21  | 517  | 420  | 544  |
| 627  | 710  | 365  | 13  | 243  | 869  | 194  |
| 888  | 703  | 387  | 25  | 683  | 1038 | 100  |
| 1200 | 563  | 776  | 63  | 412  | 443  | 154  |
| 964  | 846  | 539  | 42  | 652  | 343  | 538  |
| 627  | 802  | 33   | 60  | 416  | 1028 | 104  |
| 925  | 615  | 124  | 42  | 430  | 664  | 304  |
| 1082 | 436  | 289  | 45  | 300  | 240  | 243  |
| 676  | 397  | 582  | 43  | 694  | 518  | 448  |
| 258  | 79   | 13   | 1   | 4    | 1448 | 37   |
| 859  | 406  | 528  | 23  | 268  | 648  | 103  |
| 1244 | 906  | 146  | 81  | 241  | 391  | 176  |
| 460  | 464  | 57   | 23  | 183  | 778  | 64   |
| 545  | 810  | 139  | 24  | 370  | 702  | 130  |
| 912  | 426  | 324  | 13  | 457  | 242  | 335  |
| 833  | 359  | 292  | 45  | 494  | 291  | 207  |
| 474  | 217  | 435  | 15  | 467  | 216  | 255  |
| 891  | 492  | 32   | 14  | 194  | 539  | 81   |
| 1137 | 179  | 324  | 50  | 811  | 185  | 47   |
| 522  | 481  | 278  | 33  | 502  | 375  | 195  |
| 556  | 387  | 344  | 20  | 218  | 183  | 247  |
| 418  | 760  | 149  | 22  | 399  | 250  | 84   |
| 528  | 485  | 91   | 25  | 253  | 370  | 136  |
| 508  | 312  | 59   | 41  | 292  | 529  | 42   |
| 536  | 324  | 213  | 43  | 357  | 215  | 87   |
| 599  | 331  | 221  | 11  | 509  | 349  | 128  |
| 412  | 327  | 106  | 26  | 127  | 429  | 73   |
| 829  | 245  | 88   | 23  | 188  | 575  | 49   |
| 723  | 411  | 142  | 40  | 585  | 503  | 117  |
| 653  | 253  | 248  | 15  | 345  | 207  | 145  |
| 495  | 167  | 252  | 18  | 656  | 131  | 36   |
| 771  | 252  | 106  | 21  | 163  | 374  | 70   |
| 252  | 200  | 234  | 19  | 109  | 234  | 43   |
| 421  | 205  | 216  | 12  | 116  | 109  | 136  |
| 505  | 191  | 215  | 14  | 293  | 307  | 63   |
| 212  | 520  | 39   | 12  | 102  | 275  | 92   |
| 212  | 520  | 39   | 12  | 102  | 275  | 92   |
| 548  | 228  | 185  | 10  | 410  | 129  | 43   |
| 399  | 198  | 207  | 39  | 125  | 137  | 75   |
| 327  | 218  | 156  | 15  | 234  | 126  | 114  |
| 534  | 230  | 129  | 33  | 190  | 85   | 13   |

|     |     |     |    |     |     |     |
|-----|-----|-----|----|-----|-----|-----|
| 352 | 248 | 102 | 2  | 657 | 295 | 40  |
| 56  | 116 | 10  | 1  | 21  | 698 | 11  |
| 231 | 244 | 116 | 9  | 117 | 132 | 118 |
| 242 | 149 | 247 | 13 | 130 | 94  | 71  |
| 372 | 201 | 162 | 29 | 180 | 123 | 85  |
| 346 | 155 | 158 | 9  | 213 | 112 | 42  |
| 343 | 86  | 134 | 8  | 78  | 75  | 44  |
| 192 | 80  | 102 | 1  | 89  | 404 | 53  |
| 299 | 198 | 97  | 16 | 197 | 174 | 41  |
| 277 | 315 | 100 | 3  | 106 | 106 | 62  |
| 283 | 102 | 174 | 20 | 123 | 95  | 43  |
| 117 | 163 | 41  | 6  | 63  | 209 | 23  |
| 342 | 225 | 86  | 8  | 187 | 88  | 78  |
| 161 | 108 | 69  | 1  | 63  | 169 | 77  |
| 292 | 117 | 118 | 18 | 63  | 131 | 59  |
| 211 | 160 | 66  | 4  | 71  | 169 | 41  |
| 189 | 132 | 125 | 18 | 65  | 119 | 41  |
| 216 | 100 | 135 | 4  | 94  | 212 | 41  |
| 353 | 120 | 97  | 11 | 81  | 111 | 43  |
| 135 | 88  | 105 | 38 | 124 | 77  | 12  |
| 165 | 137 | 76  | 1  | 55  | 154 | 32  |
| 41  | 76  | 5   | 3  | 22  | 256 | 12  |
| 347 | 63  | 73  | 6  | 61  | 66  | 99  |
| 196 | 86  | 67  | 0  | 106 | 89  | 39  |
| 192 | 116 | 62  | 2  | 90  | 225 | 35  |
| 136 | 81  | 49  | 2  | 58  | 74  | 77  |
| 292 | 70  | 96  | 15 | 110 | 67  | 34  |
| 308 | 209 | 19  | 9  | 266 | 192 | 40  |
| 208 | 93  | 25  | 10 | 47  | 150 | 28  |
| 166 | 149 | 30  | 23 | 51  | 71  | 18  |
| 104 | 56  | 78  | 2  | 100 | 96  | 24  |
| 34  | 47  | 16  | 20 | 24  | 151 | 6   |
| 228 | 86  | 61  | 7  | 42  | 46  | 83  |
| 224 | 71  | 89  | 3  | 101 | 36  | 28  |
| 103 | 111 | 89  | 6  | 82  | 33  | 42  |
| 137 | 76  | 101 | 9  | 64  | 70  | 40  |
| 222 | 82  | 87  | 8  | 78  | 101 | 23  |
| 23  | 43  | 6   | 1  | 18  | 337 | 9   |
| 149 | 64  | 90  | 7  | 109 | 34  | 14  |
| 168 | 51  | 53  | 8  | 80  | 32  | 46  |
| 129 | 107 | 16  | 6  | 71  | 124 | 22  |
| 131 | 180 | 17  | 1  | 114 | 87  | 25  |
| 155 | 94  | 51  | 7  | 36  | 75  | 62  |
| 146 | 55  | 59  | 5  | 129 | 54  | 31  |
| 54  | 66  | 20  | 3  | 152 | 53  | 26  |
| 69  | 72  | 77  | 3  | 47  | 259 | 4   |
| 176 | 77  | 68  | 11 | 29  | 44  | 36  |
| 110 | 2   | 108 | 1  | 94  | 62  | 19  |
| 117 | 87  | 43  | 2  | 36  | 47  | 73  |
| 167 | 88  | 62  | 5  | 106 | 33  | 62  |
| 312 | 102 | 25  | 4  | 198 | 85  | 29  |
| 134 | 56  | 14  | 3  | 80  | 247 | 6   |
| 219 | 38  | 58  | 3  | 57  | 56  | 30  |
| 195 | 87  | 39  | 6  | 14  | 4   | 20  |
| 90  | 82  | 71  | 8  | 121 | 100 | 39  |
| 145 | 38  | 70  | 11 | 49  | 52  | 9   |
| 100 | 56  | 76  | 9  | 23  | 7   | 16  |
| 121 | 40  | 46  | 4  | 36  | 52  | 42  |
| 106 | 82  | 8   | 2  | 50  | 101 | 17  |

|     |     |    |    |     |     |    |
|-----|-----|----|----|-----|-----|----|
| 139 | 60  | 35 | 3  | 19  | 9   | 23 |
| 110 | 103 | 18 | 3  | 53  | 134 | 13 |
| 117 | 66  | 37 | 2  | 50  | 21  | 71 |
| 116 | 49  | 28 | 10 | 34  | 55  | 20 |
| 101 | 81  | 6  | 2  | 48  | 96  | 16 |
| 107 | 31  | 18 | 5  | 22  | 6   | 18 |
| 82  | 171 | 24 | 2  | 54  | 41  | 21 |
| 97  | 114 | 42 | 0  | 44  | 79  | 28 |
| 37  | 48  | 65 | 0  | 1   | 10  | 1  |
| 92  | 90  | 7  | 9  | 63  | 67  | 11 |
| 136 | 89  | 30 | 6  | 99  | 54  | 25 |
| 118 | 60  | 23 | 5  | 54  | 31  | 25 |
| 133 | 55  | 48 | 4  | 69  | 34  | 42 |
| 63  | 61  | 35 | 1  | 39  | 72  | 16 |
| 61  | 37  | 8  | 1  | 37  | 330 | 4  |
| 139 | 40  | 55 | 8  | 23  | 58  | 29 |
| 109 | 52  | 44 | 10 | 38  | 36  | 10 |
| 142 | 70  | 26 | 0  | 11  | 29  | 23 |
| 97  | 38  | 35 | 3  | 72  | 55  | 9  |
| 92  | 75  | 25 | 6  | 70  | 27  | 43 |
| 90  | 28  | 60 | 4  | 59  | 47  | 8  |
| 147 | 54  | 38 | 0  | 50  | 42  | 29 |
| 75  | 47  | 10 | 1  | 24  | 52  | 4  |
| 62  | 34  | 49 | 4  | 12  | 8   | 12 |
| 101 | 29  | 23 | 5  | 68  | 33  | 17 |
| 132 | 51  | 37 | 2  | 72  | 39  | 11 |
| 69  | 14  | 58 | 3  | 57  | 25  | 15 |
| 112 | 21  | 31 | 4  | 17  | 65  | 22 |
| 100 | 33  | 25 | 7  | 38  | 39  | 14 |
| 121 | 77  | 34 | 4  | 135 | 30  | 10 |
| 40  | 48  | 3  | 13 | 37  | 36  | 14 |
| 123 | 38  | 54 | 7  | 23  | 22  | 7  |
| 78  | 47  | 21 | 2  | 41  | 61  | 20 |
| 89  | 50  | 37 | 0  | 82  | 38  | 17 |
| 68  | 62  | 34 | 0  | 41  | 48  | 19 |
| 100 | 44  | 21 | 10 | 36  | 42  | 10 |
| 29  | 13  | 0  | 0  | 2   | 96  | 0  |
| 59  | 22  | 30 | 3  | 31  | 30  | 4  |
| 53  | 13  | 16 | 0  | 62  | 108 | 5  |
| 110 | 41  | 27 | 4  | 29  | 16  | 22 |
| 62  | 28  | 30 | 0  | 32  | 41  | 7  |
| 127 | 35  | 38 | 1  | 18  | 16  | 6  |
| 54  | 41  | 15 | 5  | 13  | 3   | 7  |
| 43  | 21  | 28 | 1  | 23  | 28  | 17 |
| 53  | 23  | 31 | 3  | 19  | 19  | 16 |
| 49  | 35  | 36 | 5  | 33  | 28  | 10 |
| 51  | 25  | 23 | 3  | 28  | 24  | 13 |
| 84  | 24  | 43 | 0  | 25  | 19  | 10 |
| 48  | 46  | 8  | 3  | 54  | 45  | 10 |
| 87  | 22  | 34 | 2  | 39  | 34  | 24 |
| 14  | 19  | 0  | 1  | 8   | 85  | 2  |
| 41  | 34  | 34 | 0  | 11  | 19  | 8  |
| 54  | 50  | 13 | 2  | 9   | 35  | 11 |
| 71  | 4   | 29 | 4  | 19  | 28  | 18 |
| 30  | 20  | 31 | 1  | 12  | 22  | 6  |
| 21  | 28  | 4  | 0  | 32  | 30  | 0  |
| 53  | 39  | 7  | 1  | 35  | 25  | 7  |
| 57  | 29  | 20 | 1  | 15  | 24  | 6  |
| 52  | 26  | 8  | 5  | 5   | 4   | 10 |

|    |    |    |   |    |    |    |
|----|----|----|---|----|----|----|
| 41 | 32 | 14 | 2 | 15 | 14 | 6  |
| 42 | 23 | 4  | 1 | 47 | 57 | 1  |
| 34 | 11 | 11 | 0 | 37 | 35 | 1  |
| 34 | 11 | 11 | 0 | 37 | 35 | 1  |
| 42 | 15 | 10 | 1 | 6  | 3  | 7  |
| 55 | 14 | 20 | 1 | 23 | 21 | 9  |
| 51 | 12 | 14 | 1 | 17 | 49 | 5  |
| 45 | 31 | 8  | 3 | 0  | 4  | 5  |
| 29 | 16 | 12 | 0 | 19 | 48 | 6  |
| 44 | 28 | 26 | 0 | 51 | 21 | 4  |
| 51 | 29 | 4  | 1 | 13 | 8  | 17 |
| 54 | 14 | 10 | 3 | 6  | 27 | 3  |
| 32 | 17 | 27 | 0 | 8  | 29 | 4  |
| 58 | 14 | 2  | 2 | 60 | 27 | 2  |
| 95 | 7  | 59 | 0 | 16 | 17 | 13 |
| 21 | 33 | 13 | 2 | 5  | 37 | 5  |
| 69 | 13 | 33 | 0 | 19 | 14 | 5  |
| 5  | 2  | 0  | 0 | 0  | 61 | 0  |
| 45 | 21 | 15 | 0 | 20 | 22 | 8  |
| 31 | 40 | 1  | 0 | 18 | 23 | 11 |
| 30 | 22 | 16 | 0 | 14 | 13 | 8  |
| 60 | 15 | 22 | 0 | 8  | 7  | 15 |
| 30 | 40 | 1  | 0 | 17 | 21 | 10 |
| 50 | 29 | 13 | 4 | 10 | 7  | 10 |
| 41 | 9  | 32 | 3 | 6  | 17 | 7  |
| 38 | 21 | 14 | 3 | 13 | 10 | 3  |
| 36 | 14 | 13 | 1 | 5  | 11 | 11 |
| 8  | 1  | 1  | 0 | 2  | 73 | 1  |
| 19 | 9  | 12 | 7 | 11 | 16 | 8  |
| 57 | 10 | 14 | 3 | 15 | 14 | 4  |
| 33 | 6  | 20 | 0 | 12 | 11 | 3  |
| 23 | 15 | 11 | 3 | 8  | 3  | 3  |
| 36 | 14 | 15 | 1 | 42 | 29 | 7  |
| 8  | 8  | 0  | 0 | 3  | 36 | 0  |
| 33 | 10 | 9  | 0 | 14 | 12 | 3  |
| 22 | 29 | 2  | 1 | 22 | 18 | 3  |
| 1  | 0  | 0  | 7 | 0  | 0  | 0  |
| 29 | 12 | 16 | 0 | 9  | 15 | 14 |
| 24 | 16 | 13 | 2 | 10 | 11 | 17 |
| 40 | 9  | 12 | 0 | 26 | 8  | 3  |
| 39 | 10 | 12 | 5 | 6  | 2  | 1  |
| 16 | 23 | 26 | 4 | 8  | 5  | 12 |
| 19 | 18 | 9  | 3 | 9  | 4  | 4  |
| 23 | 12 | 15 | 2 | 19 | 11 | 4  |
| 18 | 23 | 10 | 4 | 0  | 4  | 14 |
| 38 | 11 | 22 | 2 | 26 | 10 | 10 |
| 21 | 27 | 2  | 1 | 21 | 14 | 3  |
| 7  | 12 | 5  | 2 | 5  | 4  | 3  |
| 12 | 26 | 1  | 0 | 5  | 14 | 3  |
| 7  | 13 | 0  | 1 | 16 | 34 | 3  |
| 17 | 27 | 12 | 0 | 32 | 6  | 5  |
| 35 | 8  | 20 | 1 | 19 | 6  | 5  |
| 11 | 16 | 9  | 2 | 10 | 21 | 5  |
| 6  | 7  | 2  | 4 | 6  | 12 | 0  |
| 20 | 17 | 9  | 3 | 10 | 3  | 3  |
| 28 | 21 | 1  | 3 | 11 | 34 | 3  |
| 48 | 19 | 8  | 0 | 13 | 10 | 10 |
| 22 | 17 | 15 | 0 | 14 | 18 | 0  |
| 17 | 17 | 16 | 0 | 13 | 12 | 6  |

|    |    |    |   |    |    |    |
|----|----|----|---|----|----|----|
| 20 | 7  | 5  | 3 | 5  | 4  | 0  |
| 20 | 12 | 8  | 2 | 5  | 0  | 5  |
| 16 | 10 | 11 | 0 | 7  | 14 | 0  |
| 30 | 7  | 8  | 0 | 11 | 17 | 0  |
| 20 | 23 | 21 | 3 | 6  | 2  | 7  |
| 23 | 22 | 3  | 2 | 36 | 11 | 5  |
| 9  | 3  | 11 | 3 | 25 | 14 | 1  |
| 10 | 21 | 19 | 0 | 8  | 10 | 9  |
| 7  | 20 | 7  | 1 | 6  | 6  | 8  |
| 14 | 11 | 9  | 3 | 19 | 4  | 2  |
| 18 | 27 | 6  | 0 | 11 | 13 | 3  |
| 24 | 3  | 2  | 1 | 18 | 6  | 11 |
| 11 | 10 | 0  | 1 | 13 | 33 | 2  |
| 5  | 28 | 1  | 1 | 20 | 19 | 5  |
| 21 | 8  | 9  | 0 | 3  | 8  | 2  |
| 33 | 9  | 3  | 1 | 6  | 10 | 4  |
| 34 | 6  | 6  | 0 | 8  | 5  | 5  |
| 36 | 6  | 18 | 0 | 13 | 8  | 2  |
| 31 | 9  | 17 | 0 | 13 | 8  | 2  |
| 18 | 12 | 21 | 0 | 4  | 21 | 3  |
| 23 | 15 | 9  | 2 | 1  | 12 | 2  |
| 12 | 22 | 4  | 1 | 8  | 14 | 2  |
| 25 | 12 | 8  | 0 | 19 | 9  | 2  |
| 17 | 5  | 6  | 1 | 1  | 0  | 5  |
| 29 | 12 | 14 | 0 | 4  | 5  | 3  |
| 22 | 13 | 4  | 1 | 10 | 3  | 0  |
| 16 | 22 | 8  | 3 | 2  | 0  | 3  |
| 15 | 12 | 8  | 0 | 3  | 12 | 6  |
| 25 | 2  | 6  | 0 | 4  | 9  | 8  |
| 17 | 5  | 11 | 0 | 2  | 3  | 10 |
| 15 | 7  | 5  | 0 | 17 | 5  | 3  |
| 22 | 5  | 4  | 1 | 5  | 2  | 7  |
| 11 | 9  | 1  | 0 | 5  | 25 | 1  |
| 13 | 7  | 1  | 0 | 4  | 7  | 3  |
| 12 | 12 | 0  | 0 | 12 | 18 | 3  |
| 33 | 7  | 14 | 1 | 5  | 10 | 2  |
| 17 | 4  | 7  | 0 | 5  | 9  | 3  |
| 13 | 12 | 9  | 2 | 9  | 4  | 3  |
| 1  | 1  | 1  | 0 | 0  | 29 | 4  |
| 30 | 6  | 6  | 0 | 8  | 6  | 4  |
| 13 | 14 | 5  | 1 | 15 | 7  | 9  |
| 13 | 11 | 10 | 0 | 5  | 7  | 5  |
| 19 | 6  | 8  | 1 | 8  | 8  | 6  |
| 15 | 11 | 10 | 2 | 9  | 6  | 2  |
| 7  | 11 | 6  | 0 | 19 | 3  | 5  |
| 26 | 3  | 6  | 2 | 6  | 7  | 2  |
| 24 | 5  | 7  | 0 | 12 | 5  | 2  |
| 5  | 10 | 1  | 2 | 7  | 6  | 3  |
| 26 | 6  | 4  | 0 | 1  | 6  | 1  |
| 7  | 11 | 7  | 1 | 5  | 8  | 2  |
| 13 | 11 | 5  | 2 | 5  | 7  | 3  |
| 12 | 4  | 8  | 0 | 6  | 21 | 0  |
| 9  | 6  | 10 | 0 | 15 | 7  | 5  |
| 4  | 10 | 1  | 0 | 3  | 17 | 0  |
| 5  | 6  | 5  | 0 | 8  | 7  | 3  |
| 7  | 6  | 3  | 0 | 14 | 4  | 0  |
| 8  | 5  | 1  | 1 | 7  | 4  | 1  |
| 18 | 8  | 5  | 1 | 9  | 2  | 5  |
| 14 | 3  | 1  | 1 | 7  | 12 | 0  |

|    |    |   |   |    |    |    |
|----|----|---|---|----|----|----|
| 11 | 5  | 7 | 0 | 7  | 3  | 0  |
| 15 | 1  | 2 | 0 | 10 | 10 | 5  |
| 20 | 6  | 1 | 0 | 10 | 9  | 2  |
| 7  | 2  | 2 | 0 | 1  | 4  | 6  |
| 12 | 7  | 4 | 2 | 7  | 7  | 10 |
| 21 | 4  | 1 | 0 | 8  | 4  | 6  |
| 11 | 4  | 4 | 2 | 4  | 4  | 3  |
| 3  | 3  | 0 | 0 | 7  | 13 | 3  |
| 4  | 3  | 0 | 0 | 2  | 19 | 1  |
| 24 | 5  | 3 | 0 | 3  | 5  | 1  |
| 14 | 5  | 9 | 0 | 4  | 3  | 0  |
| 3  | 2  | 5 | 0 | 1  | 2  | 6  |
| 14 | 3  | 8 | 0 | 3  | 6  | 0  |
| 9  | 1  | 3 | 0 | 4  | 4  | 0  |
| 11 | 6  | 5 | 0 | 8  | 3  | 6  |
| 7  | 6  | 1 | 0 | 2  | 9  | 0  |
| 6  | 2  | 3 | 0 | 1  | 2  | 2  |
| 21 | 5  | 3 | 0 | 1  | 7  | 2  |
| 14 | 2  | 4 | 0 | 6  | 3  | 3  |
| 9  | 9  | 1 | 0 | 2  | 2  | 4  |
| 4  | 5  | 5 | 1 | 11 | 3  | 4  |
| 5  | 2  | 1 | 1 | 30 | 2  | 0  |
| 3  | 3  | 4 | 1 | 5  | 2  | 2  |
| 12 | 5  | 5 | 1 | 4  | 0  | 0  |
| 5  | 3  | 3 | 0 | 1  | 4  | 3  |
| 7  | 2  | 5 | 0 | 7  | 5  | 2  |
| 9  | 1  | 2 | 3 | 12 | 5  | 0  |
| 5  | 6  | 1 | 0 | 4  | 6  | 1  |
| 11 | 10 | 6 | 0 | 4  | 6  | 3  |
| 4  | 7  | 2 | 0 | 6  | 9  | 0  |
| 3  | 8  | 7 | 0 | 1  | 1  | 1  |
| 8  | 4  | 1 | 2 | 2  | 2  | 0  |
| 4  | 4  | 1 | 0 | 4  | 3  | 2  |
| 10 | 5  | 0 | 1 | 3  | 14 | 0  |
| 12 | 0  | 2 | 0 | 7  | 3  | 1  |
| 2  | 9  | 5 | 0 | 5  | 10 | 2  |
| 6  | 4  | 0 | 0 | 16 | 3  | 0  |
| 13 | 1  | 7 | 0 | 5  | 6  | 1  |
| 8  | 1  | 5 | 0 | 10 | 2  | 1  |
| 18 | 6  | 2 | 1 | 3  | 10 | 5  |
| 11 | 5  | 0 | 0 | 4  | 5  | 1  |
| 9  | 4  | 6 | 1 | 2  | 0  | 2  |
| 8  | 9  | 0 | 2 | 23 | 7  | 1  |
| 5  | 5  | 1 | 0 | 3  | 3  | 1  |
| 9  | 3  | 1 | 0 | 1  | 3  | 1  |
| 7  | 3  | 4 | 0 | 3  | 1  | 3  |
| 14 | 7  | 2 | 0 | 8  | 4  | 4  |
| 8  | 0  | 1 | 0 | 4  | 8  | 0  |
| 8  | 2  | 2 | 0 | 0  | 4  | 0  |
| 2  | 2  | 2 | 0 | 1  | 3  | 1  |
| 7  | 7  | 0 | 0 | 7  | 2  | 0  |
| 2  | 4  | 0 | 0 | 0  | 16 | 0  |
| 1  | 0  | 0 | 0 | 0  | 14 | 0  |
| 4  | 4  | 0 | 0 | 2  | 7  | 0  |
| 11 | 2  | 8 | 0 | 0  | 10 | 1  |
| 3  | 5  | 2 | 1 | 2  | 0  | 1  |
| 5  | 3  | 1 | 0 | 1  | 2  | 3  |
| 6  | 8  | 3 | 0 | 2  | 2  | 1  |
| 1  | 2  | 1 | 0 | 1  | 16 | 0  |

|    |   |   |   |    |    |   |
|----|---|---|---|----|----|---|
| 2  | 5 | 1 | 0 | 1  | 3  | 1 |
| 5  | 3 | 1 | 1 | 5  | 2  | 0 |
| 3  | 6 | 0 | 0 | 3  | 8  | 0 |
| 17 | 5 | 3 | 0 | 1  | 0  | 1 |
| 2  | 2 | 1 | 1 | 2  | 4  | 2 |
| 9  | 2 | 7 | 1 | 1  | 5  | 0 |
| 0  | 3 | 0 | 0 | 2  | 18 | 0 |
| 6  | 1 | 3 | 1 | 0  | 10 | 1 |
| 9  | 2 | 2 | 0 | 7  | 3  | 2 |
| 9  | 1 | 4 | 0 | 1  | 4  | 2 |
| 2  | 5 | 3 | 0 | 5  | 6  | 1 |
| 1  | 2 | 0 | 0 | 0  | 10 | 0 |
| 11 | 9 | 0 | 0 | 5  | 5  | 2 |
| 7  | 1 | 6 | 0 | 2  | 2  | 2 |
| 3  | 2 | 3 | 0 | 0  | 5  | 0 |
| 0  | 2 | 0 | 0 | 7  | 7  | 1 |
| 15 | 3 | 6 | 0 | 4  | 3  | 1 |
| 6  | 2 | 2 | 0 | 0  | 6  | 1 |
| 4  | 5 | 1 | 0 | 1  | 3  | 1 |
| 5  | 3 | 2 | 0 | 6  | 7  | 1 |
| 3  | 2 | 0 | 2 | 0  | 0  | 0 |
| 1  | 0 | 0 | 1 | 0  | 6  | 1 |
| 3  | 3 | 1 | 0 | 1  | 1  | 1 |
| 4  | 3 | 4 | 0 | 3  | 4  | 2 |
| 14 | 2 | 3 | 0 | 2  | 2  | 0 |
| 9  | 3 | 2 | 0 | 1  | 2  | 0 |
| 2  | 2 | 0 | 0 | 1  | 1  | 1 |
| 2  | 5 | 0 | 0 | 1  | 6  | 1 |
| 5  | 1 | 4 | 0 | 3  | 3  | 1 |
| 7  | 3 | 2 | 0 | 2  | 0  | 2 |
| 6  | 2 | 7 | 0 | 3  | 2  | 2 |
| 7  | 5 | 2 | 1 | 10 | 3  | 2 |
| 7  | 5 | 0 | 0 | 3  | 0  | 0 |
| 5  | 2 | 1 | 2 | 1  | 2  | 1 |
| 1  | 2 | 0 | 0 | 6  | 2  | 0 |
| 10 | 5 | 2 | 0 | 0  | 3  | 0 |
| 3  | 3 | 0 | 0 | 6  | 4  | 0 |
| 10 | 5 | 5 | 0 | 4  | 0  | 1 |
| 12 | 1 | 4 | 1 | 2  | 2  | 1 |
| 2  | 5 | 5 | 0 | 1  | 0  | 2 |
| 2  | 1 | 0 | 0 | 2  | 4  | 3 |
| 4  | 1 | 2 | 0 | 1  | 1  | 1 |
| 6  | 1 | 1 | 2 | 3  | 2  | 2 |
| 7  | 3 | 0 | 0 | 2  | 1  | 2 |
| 13 | 0 | 1 | 1 | 2  | 3  | 2 |
| 1  | 1 | 0 | 0 | 1  | 6  | 0 |
| 6  | 2 | 1 | 1 | 2  | 1  | 1 |
| 0  | 2 | 1 | 0 | 0  | 3  | 1 |
| 5  | 2 | 1 | 1 | 3  | 0  | 0 |
| 3  | 6 | 1 | 0 | 1  | 1  | 1 |
| 7  | 3 | 0 | 0 | 0  | 1  | 0 |
| 7  | 2 | 1 | 0 | 1  | 4  | 0 |
| 3  | 5 | 0 | 0 | 1  | 4  | 1 |
| 5  | 1 | 0 | 0 | 0  | 2  | 0 |
| 3  | 1 | 0 | 0 | 1  | 6  | 0 |
| 4  | 2 | 2 | 0 | 1  | 2  | 0 |
| 6  | 3 | 2 | 0 | 1  | 4  | 0 |
| 1  | 0 | 0 | 0 | 0  | 1  | 0 |
| 0  | 3 | 0 | 0 | 0  | 6  | 0 |



|    |   |   |   |    |   |   |
|----|---|---|---|----|---|---|
| 2  | 0 | 1 | 0 | 7  | 1 | 0 |
| 3  | 4 | 3 | 0 | 2  | 3 | 1 |
| 0  | 1 | 0 | 0 | 0  | 3 | 1 |
| 4  | 0 | 0 | 0 | 0  | 6 | 0 |
| 3  | 2 | 1 | 1 | 4  | 1 | 1 |
| 3  | 1 | 0 | 0 | 4  | 1 | 0 |
| 2  | 4 | 3 | 0 | 1  | 1 | 1 |
| 4  | 0 | 2 | 1 | 1  | 2 | 0 |
| 2  | 0 | 2 | 0 | 1  | 0 | 2 |
| 1  | 0 | 0 | 0 | 0  | 4 | 0 |
| 2  | 2 | 0 | 0 | 0  | 4 | 0 |
| 4  | 0 | 0 | 0 | 0  | 0 | 0 |
| 3  | 1 | 1 | 1 | 2  | 1 | 0 |
| 4  | 0 | 0 | 0 | 1  | 4 | 0 |
| 3  | 1 | 1 | 0 | 1  | 0 | 1 |
| 2  | 1 | 2 | 0 | 3  | 1 | 0 |
| 4  | 0 | 3 | 0 | 1  | 1 | 0 |
| 2  | 1 | 0 | 0 | 0  | 2 | 0 |
| 4  | 1 | 1 | 0 | 0  | 4 | 0 |
| 5  | 2 | 4 | 0 | 1  | 3 | 0 |
| 3  | 3 | 6 | 1 | 2  | 1 | 1 |
| 2  | 4 | 0 | 0 | 2  | 1 | 0 |
| 7  | 4 | 0 | 0 | 1  | 2 | 0 |
| 5  | 2 | 1 | 0 | 1  | 2 | 1 |
| 2  | 0 | 3 | 0 | 2  | 1 | 0 |
| 3  | 2 | 1 | 0 | 3  | 0 | 0 |
| 3  | 0 | 1 | 0 | 0  | 2 | 1 |
| 2  | 0 | 2 | 0 | 2  | 1 | 0 |
| 9  | 0 | 0 | 0 | 0  | 1 | 0 |
| 4  | 0 | 2 | 1 | 0  | 2 | 3 |
| 2  | 1 | 1 | 0 | 1  | 2 | 1 |
| 3  | 5 | 3 | 0 | 1  | 1 | 0 |
| 1  | 0 | 1 | 1 | 1  | 3 | 1 |
| 0  | 0 | 1 | 0 | 0  | 1 | 1 |
| 2  | 2 | 0 | 0 | 0  | 2 | 0 |
| 5  | 2 | 0 | 0 | 2  | 0 | 0 |
| 7  | 2 | 0 | 0 | 2  | 1 | 0 |
| 5  | 3 | 1 | 0 | 1  | 1 | 0 |
| 2  | 0 | 0 | 0 | 2  | 1 | 0 |
| 3  | 4 | 0 | 0 | 3  | 2 | 0 |
| 2  | 4 | 0 | 0 | 1  | 1 | 1 |
| 3  | 3 | 3 | 0 | 2  | 2 | 1 |
| 9  | 3 | 0 | 0 | 3  | 2 | 0 |
| 5  | 0 | 1 | 0 | 4  | 2 | 0 |
| 3  | 4 | 0 | 0 | 0  | 3 | 1 |
| 4  | 0 | 2 | 0 | 1  | 0 | 0 |
| 5  | 1 | 1 | 0 | 0  | 1 | 0 |
| 10 | 0 | 0 | 0 | 0  | 0 | 0 |
| 4  | 2 | 1 | 0 | 3  | 0 | 0 |
| 0  | 4 | 1 | 0 | 13 | 0 | 0 |
| 4  | 1 | 1 | 0 | 0  | 1 | 0 |
| 5  | 2 | 2 | 0 | 2  | 0 | 2 |

|        |       |       |      |        |       |       |
|--------|-------|-------|------|--------|-------|-------|
| 125554 | 52902 | 37952 | 3754 | 62633  | 51605 | 32381 |
| 282834 | 93261 | 84112 | 7965 | 124019 | 80516 | 89622 |

|     |     |     |     |     |     |     |
|-----|-----|-----|-----|-----|-----|-----|
| 335 | 380 | 406 | 470 | 387 | 377 | 425 |
| UC  | UC  | UC  | UC  | UC  | UC  | UC  |
| UC  | UC  | UC  | UC  | UC  | UC  | UC  |

|         |         |         |        |         |         |         |
|---------|---------|---------|--------|---------|---------|---------|
| 15      | 16      | 17      | 18     | 19      | 20      | 21      |
| 15      | 16      | 17      | 18     | 19      | 20      | 21      |
| UC      | UC      | UC      | UC     | UC      | UC      | UC      |
| D_16    | D_17    | D_18    | D_36   | D_4     | E_47    | F_43    |
| 4032681 | 1739788 | 1227867 | 121631 | 2029037 | 1734052 | 1026638 |
| UC      | UC      | UC      | UC     | UC      | UC      | UC      |
| 12.20   | 9.31    | 11.44   | 11.57  | 9.38    | 7.62    | 15.29   |
| 3.50    | 2.79    | 3.20    | 1.47   | 6.27    | 1.61    | 1.68    |
| 1.17    | 2.16    | 2.40    | 2.57   | 1.99    | 1.45    | 1.29    |
| 2.05    | 1.73    | 2.82    | 1.28   | 1.15    | 1.32    | 2.15    |
| 1.72    | 1.78    | 3.77    | 2.21   | 2.27    | 1.90    | 2.37    |
| 1.88    | 2.67    | 0.40    | 2.45   | 1.26    | 4.28    | 0.86    |
| 0.77    | 1.59    | 1.25    | 0.86   | 1.34    | 2.01    | 0.72    |
| 0.30    | 0.38    | 0.05    | 0.72   | 0.35    | 2.43    | 0.06    |
| 0.98    | 1.69    | 0.36    | 1.21   | 0.50    | 1.37    | 0.43    |
| 1.05    | 0.69    | 0.49    | 1.06   | 0.99    | 0.63    | 0.85    |
| 0.43    | 0.49    | 0.34    | 0.41   | 0.30    | 0.27    | 0.84    |
| 0.45    | 0.59    | 0.58    | 0.68   | 0.37    | 0.65    | 0.32    |
| 0.30    | 0.43    | 0.20    | 0.26   | 0.20    | 0.41    | 0.51    |
| 0.41    | 0.22    | 0.58    | 0.51   | 0.19    | 0.30    | 0.35    |
| 0.25    | 0.51    | 0.03    | 0.23   | 0.19    | 0.56    | 0.19    |
| 0.20    | 0.37    | 0.28    | 0.30   | 0.06    | 0.27    | 0.28    |
| 0.16    | 0.29    | 0.03    | 0.12   | 0.25    | 0.47    | 0.11    |
| 0.37    | 0.32    | 0.17    | 0.50   | 0.30    | 0.29    | 0.20    |
| 0.23    | 0.39    | 0.15    | 0.13   | 0.27    | 0.30    | 0.09    |
| 0.21    | 0.23    | 0.23    | 0.16   | 0.52    | 0.19    | 0.23    |
| 0.24    | 0.14    | 0.27    | 0.22   | 0.21    | 0.18    | 0.12    |
| 0.23    | 0.15    | 0.17    | 0.26   | 0.12    | 0.12    | 0.13    |
| 0.10    | 0.17    | 0.08    | 0.06   | 0.30    | 0.18    | 0.19    |
| 0.08    | 0.15    | 0.05    | 0.15   | 0.45    | 0.25    | 0.02    |
| 0.06    | 0.10    | 0.05    | 0.05   | 0.16    | 0.25    | 0.07    |
| 0.16    | 0.13    | 0.19    | 0.14   | 0.17    | 0.17    | 0.10    |
| 0.16    | 0.11    | 0.19    | 0.17   | 0.07    | 0.11    | 0.13    |
| 0.15    | 0.14    | 0.03    | 0.10   | 0.17    | 0.20    | 0.13    |
| 0.10    | 0.17    | 0.07    | 0.10   | 0.07    | 0.14    | 0.13    |
| 0.07    | 0.12    | 0.14    | 0.06   | 0.11    | 0.07    | 0.17    |
| 0.10    | 0.16    | 0.09    | 0.08   | 0.16    | 0.18    | 0.05    |
| 0.09    | 0.08    | 0.15    | 0.09   | 0.06    | 0.10    | 0.07    |
| 0.04    | 0.12    | 0.03    | 0.05   | 0.05    | 0.25    | 0.03    |
| 0.02    | 0.11    | 0.01    | 0.05   | 0.04    | 0.25    | 0.03    |
| 0.09    | 0.15    | 0.06    | 0.10   | 0.07    | 0.13    | 0.12    |
| 0.12    | 0.09    | 0.15    | 0.14   | 0.10    | 0.06    | 0.06    |
| 0.08    | 0.13    | 0.05    | 0.11   | 0.18    | 0.09    | 0.09    |
| 0.04    | 0.10    | 0.04    | 0.02   | 0.10    | 0.07    | 0.07    |
| 0.13    | 0.04    | 0.11    | 0.04   | 0.05    | 0.06    | 0.05    |
| 0.03    | 0.03    | 0.05    | 0.09   | 0.08    | 0.07    | 0.02    |
| 0.07    | 0.05    | 0.09    | 0.05   | 0.05    | 0.05    | 0.03    |
| 0.05    | 0.08    | 0.13    | 0.05   | 0.09    | 0.05    | 0.08    |
| 0.06    | 0.04    | 0.08    | 0.05   | 0.04    | 0.06    | 0.05    |
| 0.02    | 0.04    | 0.01    | 0.05   | 0.04    | 0.13    | 0.01    |
| 0.03    | 0.04    | 0.07    | 0.05   | 0.06    | 0.06    | 0.02    |
| 0.04    | 0.06    | 0.04    | 0.03   | 0.05    | 0.05    | 0.06    |
| 0.03    | 0.13    | 0.05    | 0.03   | 0.04    | 0.04    | 0.04    |
| 0.05    | 0.03    | 0.05    | 0.05   | 0.04    | 0.04    | 0.04    |
| 0.00    | 0.01    | 0.00    | 0.01   | 0.00    | 0.15    | 0.01    |
| 0.02    | 0.04    | 0.01    | 0.03   | 0.07    | 0.16    | 0.01    |
| 0.03    | 0.03    | 0.05    | 0.05   | 0.03    | 0.01    | 0.02    |
| 0.03    | 0.05    | 0.03    | 0.04   | 0.05    | 0.04    | 0.02    |

|      |      |      |      |      |      |      |
|------|------|------|------|------|------|------|
| 0.04 | 0.04 | 0.05 | 0.06 | 0.05 | 0.02 | 0.03 |
| 0.04 | 0.05 | 0.02 | 0.02 | 0.09 | 0.06 | 0.03 |
| 0.03 | 0.04 | 0.06 | 0.02 | 0.03 | 0.05 | 0.01 |
| 0.00 | 0.01 | 0.00 | 0.01 | 0.00 | 0.13 | 0.00 |
| 0.04 | 0.04 | 0.04 | 0.03 | 0.02 | 0.03 | 0.01 |
| 0.02 | 0.04 | 0.02 | 0.03 | 0.03 | 0.04 | 0.01 |
| 0.03 | 0.03 | 0.03 | 0.03 | 0.04 | 0.02 | 0.04 |
| 0.03 | 0.02 | 0.04 | 0.02 | 0.01 | 0.01 | 0.02 |
| 0.02 | 0.04 | 0.02 | 0.02 | 0.01 | 0.02 | 0.02 |
| 0.02 | 0.03 | 0.03 | 0.02 | 0.06 | 0.04 | 0.01 |
| 0.01 | 0.02 | 0.00 | 0.01 | 0.01 | 0.05 | 0.00 |
| 0.00 | 0.01 | 0.00 | 0.00 | 0.00 | 0.12 | 0.00 |
| 0.02 | 0.02 | 0.02 | 0.03 | 0.01 | 0.02 | 0.06 |
| 0.03 | 0.03 | 0.01 | 0.03 | 0.01 | 0.03 | 0.01 |
| 0.01 | 0.02 | 0.01 | 0.01 | 0.01 | 0.04 | 0.01 |
| 0.01 | 0.02 | 0.01 | 0.01 | 0.01 | 0.04 | 0.01 |
| 0.01 | 0.02 | 0.01 | 0.02 | 0.02 | 0.03 | 0.01 |
| 0.02 | 0.02 | 0.01 | 0.00 | 0.04 | 0.01 | 0.02 |
| 0.02 | 0.02 | 0.03 | 0.01 | 0.01 | 0.01 | 0.02 |
| 0.02 | 0.01 | 0.02 | 0.02 | 0.01 | 0.01 | 0.03 |
| 0.01 | 0.02 | 0.00 | 0.01 | 0.01 | 0.03 | 0.01 |
| 0.03 | 0.02 | 0.01 | 0.03 | 0.02 | 0.02 | 0.01 |
| 0.01 | 0.02 | 0.01 | 0.01 | 0.02 | 0.02 | 0.01 |
| 0.01 | 0.02 | 0.01 | 0.03 | 0.01 | 0.00 | 0.01 |
| 0.03 | 0.02 | 0.04 | 0.02 | 0.02 | 0.02 | 0.01 |
| 0.01 | 0.01 | 0.01 | 0.01 | 0.01 | 0.01 | 0.01 |
| 0.01 | 0.01 | 0.02 | 0.03 | 0.01 | 0.01 | 0.01 |
| 0.01 | 0.04 | 0.02 | 0.03 | 0.01 | 0.01 | 0.01 |
| 0.01 | 0.01 | 0.01 | 0.02 | 0.01 | 0.02 | 0.01 |
| 0.01 | 0.02 | 0.02 | 0.02 | 0.01 | 0.01 | 0.01 |
| 0.01 | 0.01 | 0.01 | 0.01 | 0.01 | 0.01 | 0.02 |
| 0.00 | 0.01 | 0.01 | 0.00 | 0.00 | 0.02 | 0.01 |
| 0.01 | 0.01 | 0.01 | 0.01 | 0.01 | 0.02 | 0.00 |
| 0.01 | 0.01 | 0.02 | 0.02 | 0.01 | 0.01 | 0.00 |
| 0.01 | 0.02 | 0.01 | 0.01 | 0.01 | 0.01 | 0.02 |
| 0.00 | 0.02 | 0.00 | 0.02 | 0.01 | 0.02 | 0.00 |
| 0.01 | 0.01 | 0.00 | 0.01 | 0.01 | 0.01 | 0.01 |
| 0.01 | 0.01 | 0.01 | 0.01 | 0.00 | 0.00 | 0.01 |
| 0.01 | 0.01 | 0.02 | 0.01 | 0.01 | 0.01 | 0.01 |
| 0.00 | 0.00 | 0.00 | 0.00 | 0.00 | 0.03 | 0.00 |
| 0.01 | 0.01 | 0.01 | 0.01 | 0.00 | 0.01 | 0.00 |
| 0.01 | 0.02 | 0.00 | 0.02 | 0.00 | 0.01 | 0.01 |
| 0.00 | 0.01 | 0.00 | 0.01 | 0.00 | 0.02 | 0.00 |
| 0.00 | 0.02 | 0.00 | 0.01 | 0.01 | 0.01 | 0.00 |
| 0.01 | 0.01 | 0.01 | 0.00 | 0.01 | 0.00 | 0.01 |
| 0.01 | 0.01 | 0.01 | 0.01 | 0.01 | 0.01 | 0.01 |
| 0.01 | 0.01 | 0.01 | 0.01 | 0.01 | 0.01 | 0.01 |
| 0.00 | 0.00 | 0.01 | 0.00 | 0.01 | 0.00 | 0.01 |
| 0.01 | 0.01 | 0.00 | 0.00 | 0.00 | 0.01 | 0.00 |
| 0.01 | 0.00 | 0.01 | 0.01 | 0.01 | 0.00 | 0.00 |
| 0.00 | 0.01 | 0.01 | 0.01 | 0.01 | 0.01 | 0.01 |
| 0.00 | 0.01 | 0.01 | 0.01 | 0.00 | 0.00 | 0.01 |
| 0.00 | 0.01 | 0.00 | 0.01 | 0.01 | 0.00 | 0.00 |
| 0.00 | 0.01 | 0.00 | 0.01 | 0.00 | 0.01 | 0.00 |
| 0.00 | 0.01 | 0.01 | 0.01 | 0.01 | 0.00 | 0.00 |
| 0.00 | 0.01 | 0.01 | 0.00 | 0.01 | 0.01 | 0.00 |
| 0.00 | 0.01 | 0.00 | 0.01 | 0.00 | 0.01 | 0.00 |
| 0.01 | 0.00 | 0.00 | 0.01 | 0.00 | 0.01 | 0.00 |
| 0.01 | 0.01 | 0.00 | 0.01 | 0.01 | 0.01 | 0.00 |







|       |       |       |       |       |       |       |
|-------|-------|-------|-------|-------|-------|-------|
| 0.78  | 2.19  | -0.47 | 1.23  | -0.17 | 1.54  | -0.32 |
| 0.75  | -0.18 | -0.68 | 0.77  | 0.59  | -0.34 | 0.24  |
| -0.14 | 0.07  | -0.50 | -0.25 | -0.64 | -0.75 | 1.39  |
| -0.38 | 0.86  | 0.79  | 1.69  | -1.09 | 1.42  | -1.56 |
| -0.31 | 0.39  | -0.89 | -0.57 | -0.93 | 0.28  | 0.86  |
| -0.34 | -1.43 | 0.63  | 0.27  | -1.58 | -0.97 | -0.67 |
| 0.16  | 1.33  | -0.87 | 0.07  | -0.14 | 1.57  | -0.13 |
| -0.42 | 0.34  | -0.08 | 0.02  | -1.01 | -0.13 | -0.06 |
| 0.02  | 0.81  | -0.78 | -0.24 | 0.57  | 1.96  | -0.30 |
| 1.53  | 1.05  | -0.43 | 2.86  | 0.86  | 0.72  | -0.17 |
| 0.42  | 1.89  | -0.30 | -0.46 | 0.75  | 1.09  | -0.79 |
| -0.22 | 0.03  | -0.02 | -0.70 | 2.92  | -0.41 | -0.01 |
| 1.33  | -0.23 | 1.83  | 0.97  | 0.82  | 0.33  | -0.68 |
| 1.27  | -0.06 | 0.22  | 1.62  | -0.44 | -0.54 | -0.27 |
| -0.28 | 0.58  | -0.54 | -0.70 | 2.30  | 0.81  | 0.86  |
| -0.41 | 0.24  | -0.62 | 0.30  | 3.13  | 1.28  | -0.89 |
| -0.41 | -0.20 | -0.47 | -0.49 | 0.20  | 0.70  | -0.37 |
| 0.91  | 0.36  | 1.35  | 0.53  | 1.12  | 1.12  | -0.27 |
| 0.42  | -0.42 | 0.79  | 0.53  | -1.11 | -0.49 | -0.21 |
| 0.37  | 0.30  | -0.76 | -0.15 | 0.57  | 0.84  | 0.18  |
| -0.16 | 1.15  | -0.80 | -0.08 | -0.68 | 0.72  | 0.45  |
| -0.65 | 0.51  | 0.80  | -0.89 | 0.21  | -0.79 | 1.51  |
| 0.13  | 1.73  | 0.02  | -0.16 | 1.63  | 2.06  | -0.88 |
| -0.64 | -0.85 | 0.45  | -0.56 | -1.27 | -0.49 | -0.99 |
| -0.35 | 0.86  | -0.47 | -0.16 | -0.14 | 2.91  | -0.48 |
| -0.27 | 0.23  | -0.32 | -0.12 | -0.16 | 0.96  | -0.26 |
| -0.08 | 1.33  | -0.75 | 0.02  | -0.63 | 0.86  | 0.63  |
| -0.12 | -0.34 | 0.06  | -0.04 | -0.26 | -0.52 | -0.52 |
| -0.40 | 0.15  | -0.80 | -0.04 | 0.81  | -0.23 | -0.32 |
| -0.50 | 0.11  | -0.54 | -0.72 | 0.03  | -0.19 | -0.25 |
| 0.34  | -0.67 | 0.10  | -0.72 | -0.64 | -0.50 | -0.58 |
| -0.57 | -0.58 | -0.39 | -0.10 | -0.19 | -0.22 | -0.63 |
| -0.10 | -0.52 | 0.19  | -0.47 | -0.50 | -0.50 | -0.98 |
| -0.70 | 0.40  | 1.79  | -0.59 | 0.68  | -0.57 | 0.22  |
| -0.05 | -0.80 | 0.64  | -0.58 | -1.06 | -0.23 | -0.77 |
| -0.32 | 0.13  | -0.76 | 0.19  | 0.00  | 2.41  | -0.56 |
| -0.73 | -0.38 | 0.22  | -0.36 | -0.14 | -0.15 | -0.91 |
| -0.48 | 1.01  | -0.21 | -0.88 | 0.37  | 0.37  | 0.72  |
| -0.30 | 3.48  | 0.32  | -0.39 | 0.07  | 0.04  | -0.21 |
| 0.16  | -0.56 | -0.09 | -0.13 | -0.33 | -0.22 | -0.34 |
| -0.29 | -0.11 | -0.34 | -0.11 | -0.36 | 4.92  | -0.13 |
| -0.29 | 0.23  | -0.45 | 0.08  | 0.81  | 3.08  | -0.40 |
| -0.25 | -0.04 | 0.63  | 0.68  | -0.40 | -1.63 | -0.96 |
| -0.02 | 0.47  | -0.19 | 0.09  | 0.37  | 0.06  | -0.53 |
| 0.56  | 0.05  | 1.12  | 1.82  | 0.80  | -1.00 | -0.70 |
| 0.33  | 0.87  | -0.73 | -0.44 | 3.16  | 1.62  | -0.02 |
| 0.25  | 0.74  | 2.00  | -0.26 | 0.37  | 1.61  | -0.83 |

|       |       |       |       |       |       |       |
|-------|-------|-------|-------|-------|-------|-------|
| -0.24 | -0.03 | -0.32 | 0.04  | -0.23 | 4.85  | -0.19 |
| 1.11  | 1.17  | 0.70  | 0.16  | -0.43 | 0.05  | -1.06 |
| -0.10 | 1.24  | 0.00  | 0.46  | 0.62  | 1.60  | -1.20 |
| -0.20 | 0.31  | -0.36 | -0.07 | 0.33  | -0.63 | 0.53  |
| -0.34 | -0.55 | -0.09 | -0.66 | -0.70 | -0.73 | -0.59 |
| -0.54 | 0.93  | -0.19 | 0.02  | -0.90 | -0.57 | -0.30 |
| -0.04 | 0.74  | 0.39  | 0.12  | 3.16  | 1.19  | -0.94 |
| -0.28 | 1.18  | -0.62 | -0.25 | -0.25 | 2.98  | -0.48 |
| -0.08 | -0.06 | -0.21 | -0.22 | -0.23 | 4.98  | -0.23 |
| -0.39 | -0.45 | -0.80 | 0.05  | -1.28 | -0.66 | 1.94  |
| 0.96  | 1.19  | -0.45 | 1.49  | -0.30 | 1.17  | -0.47 |
| -0.42 | 0.82  | -0.28 | -0.07 | -0.06 | 2.06  | -0.40 |
| 0.29  | 0.61  | -0.49 | -0.06 | -0.43 | 2.88  | -0.40 |
| 0.21  | 0.40  | 0.11  | 0.28  | 0.76  | 2.03  | -0.57 |
| -0.13 | -0.19 | -0.27 | -0.37 | 0.07  | -0.29 | -0.19 |
| -0.39 | 0.00  | 0.45  | -0.47 | -0.61 | -0.72 | -0.43 |
| -0.43 | -0.92 | -0.33 | 0.27  | -1.30 | -0.85 | 0.68  |
| 0.08  | 1.25  | -0.80 | 0.00  | -0.10 | 1.50  | -0.23 |
| 1.51  | 0.48  | -0.06 | 2.70  | 0.35  | 0.67  | -0.08 |
| -0.19 | 1.67  | 0.05  | 0.35  | 0.53  | 1.56  | -0.42 |
| -0.46 | 0.03  | -0.29 | 1.15  | -0.76 | -1.14 | -0.75 |
| 1.68  | 0.81  | 2.72  | 0.37  | 1.04  | 0.09  | -0.77 |
| -0.26 | -0.25 | -0.19 | -0.34 | -0.31 | -0.19 | -0.31 |
| -0.34 | -0.28 | -0.15 | 1.42  | -0.88 | -0.79 | -0.75 |
| -0.59 | 2.25  | 0.04  | 1.06  | -0.57 | -0.85 | -0.28 |
| 0.26  | 0.68  | 0.36  | 0.82  | -1.07 | 0.90  | -0.60 |
| -0.55 | 0.50  | 0.57  | 1.25  | -0.43 | -0.16 | 0.05  |
| -0.42 | -0.58 | -0.47 | -1.01 | -0.77 | -0.78 | 0.02  |
| -0.28 | 0.11  | -0.06 | -0.35 | -0.33 | 0.27  | -0.23 |
| -0.14 | 0.90  | 0.38  | -0.21 | 0.50  | 2.05  | -0.82 |
| 0.14  | 0.33  | 2.07  | 1.42  | -0.39 | -0.03 | -0.71 |
| -1.10 | 0.56  | 0.21  | -0.40 | -0.55 | -1.30 | 0.69  |
| -0.18 | 1.49  | -0.87 | 1.63  | 0.09  | 2.28  | -0.48 |
| -0.26 | 0.86  | -1.35 | 0.75  | -0.40 | 1.19  | 0.27  |
| -0.40 | -0.45 | -0.52 | 0.02  | -0.87 | -0.89 | -0.54 |
| -0.65 | -0.11 | 1.91  | 0.91  | 0.81  | 0.54  | 1.52  |
| 0.07  | -0.04 | -0.25 | -0.27 | -0.30 | 4.95  | -0.10 |
| 0.05  | 0.27  | 1.93  | -0.14 | -0.63 | 1.57  | -0.92 |
| 0.84  | 2.30  | -0.39 | 3.20  | -0.39 | 0.37  | -0.07 |
| 0.00  | 0.97  | -0.41 | 0.47  | -0.14 | 2.17  | -0.32 |
| -0.33 | 1.85  | -0.46 | 0.08  | -0.02 | 1.51  | -0.39 |
| -0.15 | 0.04  | 0.15  | -1.06 | -0.14 | -0.77 | 0.58  |
| -0.11 | -0.05 | 0.29  | 1.93  | 0.37  | -0.49 | -0.20 |
| -0.85 | -0.77 | 0.98  | -0.80 | 0.03  | -0.75 | 0.13  |
| 0.82  | 1.32  | -0.62 | 0.04  | -0.10 | 1.58  | -0.24 |
| 0.56  | -0.43 | 0.47  | 1.30  | 1.24  | -0.39 | -0.77 |
| -0.34 | 1.65  | 0.94  | 1.53  | 1.22  | 0.92  | 0.42  |
| -0.67 | -0.05 | 0.32  | -0.47 | -0.87 | -0.85 | 0.02  |



|       |       |       |       |       |       |       |
|-------|-------|-------|-------|-------|-------|-------|
| -0.42 | 0.50  | -0.37 | -0.21 | -0.17 | -0.29 | -0.48 |
| -0.13 | 1.51  | -0.73 | 0.68  | -0.19 | 0.85  | -0.14 |
| 0.19  | 0.72  | -0.53 | 2.16  | 0.36  | 1.97  | -0.61 |
| -0.35 | 0.21  | 0.06  | 1.82  | 0.08  | -0.38 | -0.82 |
| -0.27 | -0.06 | -0.12 | -0.54 | 0.22  | 0.02  | -0.39 |
| -0.15 | 0.77  | -0.31 | 1.00  | -0.55 | 1.44  | -0.48 |
| 1.16  | 0.41  | -0.46 | 0.98  | -0.20 | 2.88  | -0.77 |
| 0.54  | 1.25  | -0.18 | 2.26  | 1.80  | 1.94  | -0.22 |
| 0.25  | 0.04  | 0.92  | -0.36 | 0.41  | -0.35 | -0.11 |
| -0.06 | -0.32 | 0.83  | 0.22  | 2.10  | -0.52 | -0.99 |
| 1.15  | 0.59  | -0.20 | 0.93  | -0.28 | 1.59  | -0.46 |
| -0.73 | -0.07 | 0.82  | 0.41  | -0.83 | 0.21  | -0.98 |
| -0.64 | -0.41 | 0.37  | -0.71 | -1.29 | -1.18 | -0.27 |
| 0.53  | 0.27  | 1.58  | 0.35  | 0.95  | 1.77  | -0.79 |
| -0.64 | 2.80  | -0.92 | 0.00  | -0.66 | 0.90  | -0.15 |
| -0.64 | 2.80  | -0.92 | 0.00  | -0.66 | 0.90  | -0.15 |
| 0.00  | -0.01 | 0.15  | -0.47 | 0.61  | -0.51 | -0.84 |
| -0.14 | 0.06  | 0.68  | 2.45  | -0.56 | -0.33 | -0.45 |
| -0.47 | 0.46  | 0.45  | 0.38  | 0.22  | -0.57 | 0.09  |
| 0.58  | 0.61  | 0.27  | 2.22  | 0.14  | -0.37 | -0.82 |
| 0.05  | 0.89  | -0.01 | -0.97 | 3.48  | 1.35  | -0.66 |
| -0.23 | 0.41  | -0.30 | -0.30 | -0.27 | 4.54  | -0.27 |
| -0.87 | 0.33  | -0.35 | -0.63 | -0.86 | -0.56 | -0.09 |
| -0.44 | 0.01  | 1.84  | 0.33  | -0.36 | -0.49 | -0.30 |
| 0.01  | 0.44  | 0.68  | 2.47  | -0.04 | -0.29 | -0.16 |
| -0.19 | -0.13 | 0.31  | -0.31 | 0.04  | -0.39 | -0.70 |
| -0.20 | -0.44 | -0.01 | -0.33 | -0.53 | -0.48 | -0.50 |
| -0.12 | -0.12 | 0.37  | -0.64 | -0.16 | 2.52  | -0.07 |
| 0.14  | 1.20  | 0.27  | 1.60  | 0.73  | 0.91  | -0.73 |
| 0.03  | 2.67  | 0.33  | -0.96 | -0.34 | -0.08 | -0.18 |
| -0.22 | -0.35 | 0.70  | 0.99  | -0.33 | -0.38 | -0.58 |
| -0.33 | 0.91  | -0.24 | 0.06  | -0.28 | 1.46  | -0.45 |
| 0.37  | 1.71  | -0.03 | -0.15 | 0.60  | -0.52 | 0.10  |

| 12           | 13           | 14          | 15           | 16            | 17           | 18            |
|--------------|--------------|-------------|--------------|---------------|--------------|---------------|
| 14           | 15           | 16          | 17           | 18            | 19           | 20            |
| TGTAACATCCCC | TGAGGTAGTAGT | TGAGGTAGTAG | TGAGGTAGTAGA | AGCTCGGTCTGAC | TTCAAGTAATTC | AGCAGCATTGTAC |
| miR-30d-5p   | let-7g-5p    | let-7b-5p   | let-7f-5p    | miR-423-3p    | miR-26b-5p   | miR-103a-3p   |
| 2131733      | 1899491      | 1666971     | 1418336      | 1093922       | 1034642      | 1030775       |
| 1.36         | -0.70        | 2.23        | -0.82        | 0.03          | -0.79        | -0.02         |
| -1.18        | -1.21        | -1.07       | -0.14        | -1.22         | -0.15        | 0.44          |
| 0.67         | 0.87         | 1.24        | 0.39         | -0.87         | 0.07         | 0.76          |
| -0.53        | 1.05         | 1.04        | -0.35        | -0.64         | -0.29        | -0.33         |
| -0.37        | 2.12         | 0.48        | 0.34         | -1.06         | 1.51         | 1.38          |
| -1.57        | 0.23         | -0.45       | -0.04        | 1.52          | -0.34        | -1.13         |
| 0.31         | 1.39         | -0.41       | -0.60        | 2.37          | -0.33        | -0.23         |
| 0.77         | -1.39        | 0.48        | -0.86        | 0.36          | -0.80        | -1.13         |
| -0.94        | -1.02        | -0.41       | -0.43        | -0.53         | -0.64        | -1.03         |
| -1.48        | -0.32        | -0.23       | 0.20         | -0.77         | -0.38        | -0.64         |
| -0.41        | -0.92        | -1.34       | 0.23         | -0.54         | 0.01         | -0.83         |
| -0.62        | -0.13        | -0.25       | 0.08         | 1.58          | -0.69        | -0.68         |
| 0.02         | 2.52         | -0.88       | 3.89         | -0.34         | 3.45         | 1.13          |
| -0.26        | -1.23        | 1.60        | -0.85        | 0.20          | -0.82        | -0.92         |
| -0.38        | -0.31        | -0.34       | 0.16         | -0.42         | 0.02         | 1.53          |
| 0.86         | 0.39         | -1.43       | 1.33         | 0.34          | 0.81         | 1.05          |
| 0.79         | -0.89        | 0.63        | -0.87        | -0.08         | -0.78        | -0.43         |
| 1.69         | -0.57        | 0.27        | 0.07         | 0.02          | -0.24        | 2.86          |
| -1.09        | -0.93        | -1.58       | -0.14        | -1.01         | 0.57         | 0.86          |
| 1.42         | 0.28         | -0.97       | 1.57         | -0.13         | 1.96         | 0.72          |

|       |       |       |       |       |       |       |
|-------|-------|-------|-------|-------|-------|-------|
| -1.56 | 0.86  | -0.67 | -0.13 | -0.06 | -0.30 | -0.17 |
| 1.04  | 0.21  | -0.06 | -0.69 | 1.71  | -0.73 | -0.09 |
| 1.58  | 0.30  | 0.73  | -0.60 | 1.01  | -0.74 | 0.11  |
| 0.57  | -0.56 | 1.83  | -0.83 | 1.46  | -0.86 | -0.49 |
| -0.97 | -0.51 | 0.38  | -0.57 | -1.06 | -0.34 | -1.15 |
| 0.43  | 0.09  | -0.14 | -0.74 | -0.90 | -0.19 | -0.73 |
| -0.16 | 0.35  | -0.67 | 0.41  | -0.98 | 1.00  | -0.82 |
| -1.11 | 1.60  | -0.97 | 3.67  | -0.88 | 1.74  | 0.06  |
| -1.90 | 0.14  | -1.69 | 1.03  | -0.80 | 0.70  | -0.14 |
| -2.45 | -1.15 | -1.30 | -0.09 | -1.13 | -0.30 | 0.20  |
| -1.11 | -1.33 | 1.11  | -0.74 | -1.15 | -0.80 | -0.06 |
| -2.10 | -0.25 | -1.17 | 1.39  | -1.23 | 0.77  | 1.21  |
| -0.74 | 1.21  | -0.06 | 1.59  | -1.14 | 3.42  | 1.17  |
| -0.37 | -1.15 | 0.14  | -0.73 | 1.15  | -0.46 | -0.75 |
| -0.43 | -1.28 | 1.18  | -0.67 | -0.63 | -0.65 | 0.28  |
| -0.78 | 1.05  | -1.14 | -0.59 | 0.59  | -0.32 | -0.77 |
| -2.02 | -1.74 | 2.07  | -0.90 | 0.71  | -0.96 | -1.84 |
| -0.75 | 0.71  | -1.12 | 0.17  | -0.86 | -0.05 | 0.40  |
| -0.21 | 0.68  | -1.06 | 1.16  | -0.90 | 1.30  | 0.90  |
| 0.55  | -0.09 | -1.01 | -0.28 | -0.42 | -0.08 | -0.21 |
| -0.79 | -0.79 | 1.50  | -0.88 | 0.49  | -0.76 | 0.41  |
| -0.73 | -0.29 | 3.71  | -0.84 | 2.47  | -0.77 | 2.61  |
| 0.39  | -0.36 | -0.60 | -0.75 | 0.55  | -0.67 | -0.28 |
| -1.43 | 0.49  | -1.59 | 0.18  | -0.32 | 0.76  | 1.57  |
| -0.60 | -1.55 | -1.23 | -0.66 | -0.34 | -0.68 | -0.39 |
| -0.85 | -1.30 | 1.47  | -0.92 | 1.32  | -0.85 | -1.04 |
| 0.82  | 0.09  | -1.66 | -0.02 | -0.19 | 0.85  | 0.06  |
| 1.89  | -0.26 | -0.98 | -0.40 | 0.98  | -0.42 | 0.33  |
| 3.59  | -0.88 | -0.77 | -0.28 | 0.58  | -0.14 | 0.95  |
| 1.84  | -0.56 | -0.95 | -0.65 | 0.57  | -0.36 | 0.15  |
| 2.95  | -0.43 | -1.23 | -0.19 | -0.12 | 0.19  | 1.00  |
| 0.67  | -0.02 | -0.59 | -0.80 | 0.32  | -0.58 | -0.13 |
| -0.78 | -0.40 | 0.56  | -0.70 | -0.20 | -0.64 | -0.25 |
| 0.77  | 1.27  | -0.76 | 0.01  | 0.43  | 0.24  | 1.50  |
| -0.69 | -0.09 | -0.60 | -0.31 | 0.59  | -0.53 | -0.67 |
| -0.37 | -0.95 | 0.13  | -0.81 | -0.53 | -0.67 | -0.59 |
| 0.20  | 0.74  | -0.62 | -0.20 | -0.12 | -0.23 | -0.15 |
| -1.13 | 2.98  | -1.21 | 2.56  | -0.98 | 3.28  | -0.66 |
| 0.73  | 1.44  | 0.12  | -0.59 | -0.60 | -0.37 | -0.80 |
| 2.52  | 2.98  | -0.12 | 0.82  | -0.93 | 1.38  | 0.71  |
| 1.27  | 2.87  | -0.54 | 0.45  | -1.05 | 1.52  | 0.50  |
| -1.15 | 1.90  | -1.03 | 2.24  | -1.00 | 2.50  | -0.58 |
| 0.27  | -0.78 | 1.15  | -0.81 | -0.46 | -0.65 | -1.46 |
| -0.30 | 0.82  | 0.18  | -0.46 | -0.19 | -0.61 | -1.29 |
| -0.57 | 1.59  | 0.18  | 0.15  | -0.88 | 0.33  | -1.08 |
| 0.49  | 1.66  | 0.24  | 2.44  | 0.38  | -0.48 | 1.76  |
| -0.81 | -0.52 | -0.27 | -0.19 | -0.97 | 0.16  | -0.36 |
| -2.17 | -1.08 | -1.02 | 0.05  | -1.25 | -0.29 | 2.03  |
| 5.34  | 5.24  | 6.59  | 0.77  | -0.76 | 0.44  | 3.48  |
| 5.55  | 2.97  | 1.48  | 0.55  | -0.70 | 1.84  | 3.75  |
| -0.14 | 0.67  | -0.02 | -0.36 | -0.12 | -0.26 | 0.11  |
| -1.03 | 2.51  | -2.12 | 4.99  | -1.16 | 0.45  | -0.96 |
| -0.74 | 1.06  | 0.21  | 0.60  | -0.39 | 0.05  | -0.55 |
| 1.01  | 0.47  | 0.87  | 1.39  | -0.22 | 1.04  | 1.06  |
| -1.12 | -1.64 | 8.15  | -0.97 | 2.03  | -0.95 | 0.14  |
| -0.36 | 2.20  | -0.75 | 1.68  | 0.50  | 0.76  | 0.57  |
| -1.54 | -0.62 | -1.54 | -0.07 | -1.14 | 0.23  | 0.84  |
| -1.86 | -1.17 | -0.96 | 0.51  | -1.03 | -0.42 | -0.12 |
| 0.57  | 0.70  | -0.74 | 0.61  | -0.80 | 2.07  | 2.68  |

|       |       |       |       |       |       |       |
|-------|-------|-------|-------|-------|-------|-------|
| 0.66  | -0.03 | -1.32 | 0.28  | -0.51 | 0.97  | 0.10  |
| 0.67  | -1.44 | 0.20  | -0.77 | -0.34 | -0.71 | -0.84 |
| -0.73 | 1.86  | -0.79 | 0.32  | -0.36 | 1.01  | -0.11 |
| 1.28  | -1.43 | -1.22 | -0.69 | 1.88  | -0.73 | -0.49 |
| 1.16  | 0.48  | -1.32 | 2.11  | -0.29 | 1.79  | 1.38  |
| -0.74 | 1.91  | -1.20 | 4.03  | -0.87 | 3.05  | 0.40  |
| 0.70  | -1.26 | -1.22 | -0.64 | -0.04 | -0.34 | 0.02  |
| 1.07  | 0.76  | -1.02 | -0.06 | 0.02  | 1.11  | 0.41  |
| -0.31 | 0.21  | -0.66 | -0.54 | 0.00  | -0.11 | -0.34 |
| -0.50 | 0.31  | -1.48 | 1.49  | -0.77 | 1.81  | 1.72  |
| -0.30 | -0.10 | -1.02 | -0.46 | -0.15 | -0.06 | 0.17  |
| -0.11 | 7.32  | -0.62 | 5.96  | -0.34 | 1.52  | 1.07  |
| -1.93 | -0.21 | -1.42 | -0.58 | -0.57 | -0.32 | -0.30 |
| 1.81  | 0.37  | 0.27  | -0.65 | 1.13  | -0.64 | -0.31 |
| -1.52 | 0.28  | -1.02 | 0.08  | -0.98 | 0.47  | -0.82 |
| -0.38 | 1.22  | -0.16 | -0.55 | -0.86 | -0.07 | -0.71 |
| -1    | 0     | 0     | 0     | -1    | -1    | 0     |
| 0.00  | 0.00  | 0.00  | 0.00  | 0.00  | 0.00  | 0.00  |
| 1.00  | 1.00  | 1.00  | 1.00  | 1.00  | 1.00  | 1.00  |
| 0.49  | 0.19  | 0.75  | 0.05  | 0.61  | 0.26  | 0.05  |

| 12           | 13           | 14          | 15           | 16            | 17           | 18            |
|--------------|--------------|-------------|--------------|---------------|--------------|---------------|
| TGTAACATCCCC | TGAGGTAGTAGT | TGAGGTAGTAG | TGAGGTAGTAGA | AGCTCGGTCTGAC | TTCAAGTAATTC | AGCAGCATTGTAC |
| miR-30d-5p   | let-7g-5p    | let-7b-5p   | let-7f-5p    | miR-423-3p    | miR-26b-5p   | miR-103a-3p   |
| 2131733      | 1899491      | 1666971     | 1418336      | 1093922       | 1034642      | 1030775       |
| 1.36         | -0.70        | 2.23        | -0.82        | 0.03          | -0.79        | -0.02         |
| -1.18        | -1.21        | -1.07       | -0.14        | -1.22         | -0.15        | 0.44          |
| 0.67         | 0.87         | 1.24        | 0.39         | -0.87         | 0.07         | 0.76          |
| -0.53        | 1.05         | 1.04        | -0.35        | -0.64         | -0.29        | -0.33         |
| -0.37        | 2.12         | 0.48        | 0.34         | -1.06         | 1.51         | 1.38          |
| -1.57        | 0.23         | -0.45       | -0.04        | 1.52          | -0.34        | -1.13         |
| 0.31         | 1.39         | -0.41       | -0.60        | 2.37          | -0.33        | -0.23         |
| 0.77         | -1.39        | 0.48        | -0.86        | 0.36          | -0.80        | -1.13         |
| -0.94        | -1.02        | -0.41       | -0.43        | -0.53         | -0.64        | -1.03         |
| -1.48        | -0.32        | -0.23       | 0.20         | -0.77         | -0.38        | -0.64         |
| -0.41        | -0.92        | -1.34       | 0.23         | -0.54         | 0.01         | -0.83         |
| -0.62        | -0.13        | -0.25       | 0.08         | 1.58          | -0.69        | -0.68         |
| 0.02         | 2.52         | -0.88       | 3.89         | -0.34         | 3.45         | 1.13          |
| -0.26        | -1.23        | 1.60        | -0.85        | 0.20          | -0.82        | -0.92         |
| -0.38        | -0.31        | -0.34       | 0.16         | -0.42         | 0.02         | 1.53          |
| 0.86         | 0.39         | -1.43       | 1.33         | 0.34          | 0.81         | 1.05          |
| 0.79         | -0.89        | 0.63        | -0.87        | -0.08         | -0.78        | -0.43         |
| 1.69         | -0.57        | 0.27        | 0.07         | 0.02          | -0.24        | 2.86          |
| -1.09        | -0.93        | -1.58       | -0.14        | -1.01         | 0.57         | 0.86          |
| 1.42         | 0.28         | -0.97       | 1.57         | -0.13         | 1.96         | 0.72          |
| -1.56        | 0.86         | -0.67       | -0.13        | -0.06         | -0.30        | -0.17         |
| 1.04         | 0.21         | -0.06       | -0.69        | 1.71          | -0.73        | -0.09         |
| 1.58         | 0.30         | 0.73        | -0.60        | 1.01          | -0.74        | 0.11          |
| 0.57         | -0.56        | 1.83        | -0.83        | 1.46          | -0.86        | -0.49         |
| -0.97        | -0.51        | 0.38        | -0.57        | -1.06         | -0.34        | -1.15         |
| 0.43         | 0.09         | -0.14       | -0.74        | -0.90         | -0.19        | -0.73         |
| -0.16        | 0.35         | -0.67       | 0.41         | -0.98         | 1.00         | -0.82         |
| -1.11        | 1.60         | -0.97       | 3.67         | -0.88         | 1.74         | 0.06          |

|       |       |       |       |       |       |       |
|-------|-------|-------|-------|-------|-------|-------|
| -1.90 | 0.14  | -1.69 | 1.03  | -0.80 | 0.70  | -0.14 |
| -2.45 | -1.15 | -1.30 | -0.09 | -1.13 | -0.30 | 0.20  |
| -1.11 | -1.33 | 1.11  | -0.74 | -1.15 | -0.80 | -0.06 |
| -2.10 | -0.25 | -1.17 | 1.39  | -1.23 | 0.77  | 1.21  |
| -0.74 | 1.21  | -0.06 | 1.59  | -1.14 | 3.42  | 1.17  |
| -0.37 | -1.15 | 0.14  | -0.73 | 1.15  | -0.46 | -0.75 |
| -0.43 | -1.28 | 1.18  | -0.67 | -0.63 | -0.65 | 0.28  |
| -0.78 | 1.05  | -1.14 | -0.59 | 0.59  | -0.32 | -0.77 |
| -2.02 | -1.74 | 2.07  | -0.90 | 0.71  | -0.96 | -1.84 |
| -     | 0.71  | -1.12 | 0.17  | -0.86 | -0.05 | 0.40  |
| -     | 0.68  | -1.06 | 1.16  | -0.90 | 1.30  | 0.90  |
| -     | -0.09 | -1.01 | -0.28 | -0.42 | -0.08 | -0.21 |
| -     | -0.79 | 1.50  | -0.88 | 0.49  | -0.76 | 0.41  |
| -     | -0.29 | 3.71  | -0.84 | 2.47  | -0.77 | 2.61  |
| -     | -0.36 | -0.60 | -0.75 | 0.55  | -0.67 | -0.28 |
| -     | 0.49  | -1.59 | 0.18  | -0.32 | 0.76  | 1.57  |
| -     | -1.55 | -1.23 | -0.66 | -0.34 | -0.68 | -0.39 |
| -     | -1.30 | 1.47  | -0.92 | 1.32  | -0.85 | -1.04 |
| -     | 0.09  | -1.66 | -0.02 | -0.19 | 0.85  | 0.06  |
| -     | -0.26 | -0.98 | -0.40 | 0.98  | -0.42 | 0.33  |
| -     | -0.88 | -0.77 | -0.28 | 0.58  | -0.14 | 0.95  |
| -     | -0.56 | -0.95 | -0.65 | 0.57  | -0.36 | 0.15  |
| -     | -0.43 | -1.23 | -0.19 | -0.12 | 0.19  | 1.00  |
| -     | -0.02 | -0.59 | -0.80 | 0.32  | -0.58 | -0.13 |
| -     | -0.40 | 0.56  | -0.70 | -0.20 | -0.64 | -0.25 |
| -     | 1.27  | -0.76 | 0.01  | 0.43  | 0.24  | 1.50  |
| -     | -0.09 | -0.60 | -0.31 | 0.59  | -0.53 | -0.67 |
| -     | -0.37 | -0.95 | -0.81 | -0.53 | -0.67 | -0.59 |
| -     | 0.20  | 0.74  | -0.62 | -0.12 | -0.23 | -0.15 |
| -     | -1.13 | 2.98  | -1.21 | 2.56  | -0.98 | 3.28  |
| -     | 0.73  | 1.44  | 0.12  | -0.59 | -0.60 | -0.37 |
| -     | 2.52  | 2.98  | -0.12 | 0.82  | -0.93 | 1.38  |
| -     | 1.27  | 2.87  | -0.54 | 0.45  | -1.05 | 1.52  |
| -     | -1.15 | 1.90  | -1.03 | 2.24  | -1.00 | 2.50  |
| -     | 0.27  | -0.78 | 1.15  | -0.81 | -0.46 | -0.65 |
| -     | -0.30 | 0.82  | 0.18  | -0.46 | -0.19 | -0.61 |
| -     | -0.57 | 1.59  | 0.18  | 0.15  | -0.88 | 0.33  |
| -     | 0.49  | 1.66  | 0.24  | 2.44  | 0.38  | -0.48 |
| -     | -0.81 | -0.52 | -0.27 | -0.19 | -0.97 | 0.16  |
| -     | -2.17 | -1.08 | -1.02 | 0.05  | -1.25 | -0.29 |
| -     | 5.34  | 5.24  | 6.59  | 0.77  | -0.76 | 0.44  |
| -     | 5.55  | 2.97  | 1.48  | 0.55  | -0.70 | 1.84  |
| -     | -0.14 | 0.67  | -0.02 | -0.36 | -0.12 | -0.26 |
| -     | -1.03 | 2.51  | -2.12 | 4.99  | -1.16 | 0.45  |
| -     | -0.74 | 1.06  | 0.21  | 0.60  | -0.39 | 0.05  |
| -     | 1.01  | 0.47  | 0.87  | 1.39  | -0.22 | 1.04  |
| -     | -1.12 | -1.64 | 8.15  | -0.97 | 2.03  | -0.95 |
| -     | -0.36 | 2.20  | -0.75 | 1.68  | 0.50  | 0.76  |
| -     | -1.54 | -0.62 | -1.54 | -0.07 | -1.14 | 0.23  |
| -     | -1.86 | -1.17 | -0.96 | 0.51  | -1.03 | -0.42 |
| -     | 0.57  | 0.70  | -0.74 | 0.61  | -0.80 | 2.07  |
| -     | 0.66  | -0.03 | -1.32 | 0.28  | -0.51 | 0.97  |
| -     | 0.67  | -1.44 | 0.20  | -0.77 | -0.34 | -0.71 |
| -     | -0.73 | 1.86  | -0.79 | 0.32  | -0.36 | 1.01  |
| -     | 1.28  | -1.43 | -1.22 | -0.69 | 1.88  | -0.73 |
| -     | 1.16  | 0.48  | -1.32 | 2.11  | -0.29 | 1.79  |
| -     | -0.74 | 1.91  | -1.20 | 4.03  | -0.87 | 3.05  |
| -     | 0.70  | -1.26 | -1.22 | -0.64 | -0.04 | -0.34 |
| -     | 1.07  | 0.76  | -1.02 | -0.06 | 0.02  | 1.11  |

— B\_33

— C\_2

|       |       |       |       |       |       |       |
|-------|-------|-------|-------|-------|-------|-------|
| -0.31 | 0.21  | -0.66 | -0.54 | 0.00  | -0.11 | -0.34 |
| -0.50 | 0.31  | -1.48 | 1.49  | -0.77 | 1.81  | 1.72  |
| -0.30 | -0.10 | -1.02 | -0.46 | -0.15 | -0.06 | 0.17  |
| -0.11 | 7.32  | -0.62 | 5.96  | -0.34 | 1.52  | 1.07  |
| -1.93 | -0.21 | -1.42 | -0.58 | -0.57 | -0.32 | -0.30 |
| 1.81  | 0.37  | 0.27  | -0.65 | 1.13  | -0.64 | -0.31 |
| -1.52 | 0.28  | -1.02 | 0.08  | -0.98 | 0.47  | -0.82 |
| 0     | 1     | 0     | -1    | -1    | 0     | -1    |

---

| 12                                                                                      | 13        | 14         | 15          | 16     | 17         | 18         |
|-----------------------------------------------------------------------------------------|-----------|------------|-------------|--------|------------|------------|
| 24                                                                                      | 9         | 56         | 126         | 116    | 88         | 68         |
| TGTCAGTTTGTCTAAGCTGCCAGTTCTACAGTACTGTACTCTTTCCCTGTGAGGTAGTAGGTTCGTACCGTGAGTAAAGTGCTTATF |           |            |             |        |            |            |
| miR-223-3p                                                                              | miR-22-3p | miR-101-3p | miR-130b-5p | let-7c | miR-126-3p | miR-20a-5p |
| 624773                                                                                  | 3462453   | 134502     | 12970       | 18147  | 41318      | 79678      |
| -0.15                                                                                   | -0.38     | -0.13      | 0.32        | 0.13   | -0.88      | -0.66      |
| 0.42                                                                                    | -0.94     | -0.38      | -0.98       | 1.32   | 0.03       | 0.38       |
| -0.05                                                                                   | 1.75      | -0.16      | -0.91       | 0.55   | 0.30       | 1.06       |
| -0.48                                                                                   | 0.03      | -0.22      | -0.74       | -0.11  | -0.25      | -0.16      |
| 0.78                                                                                    | -1.00     | -0.32      | 2.95        | -0.41  | 0.27       | -0.02      |
| -0.90                                                                                   | -0.66     | -0.29      | 2.28        | -0.54  | -0.83      | -0.80      |
| -0.98                                                                                   | -0.75     | -0.22      | 0.25        | 0.83   | -0.81      | -0.51      |
| -0.87                                                                                   | -0.89     | -0.32      | 0.67        | -1.01  | -0.77      | -0.90      |
| -0.70                                                                                   | -0.03     | -0.34      | -0.85       | -0.58  | -0.53      | -0.74      |
| -0.59                                                                                   | -0.35     | -0.23      | -0.46       | -1.00  | -0.30      | -0.23      |
| 1.52                                                                                    | 0.02      | -0.21      | -1.02       | -1.11  | 0.61       | -0.26      |
| -0.97                                                                                   | -0.70     | -0.33      | 0.63        | 1.17   | -0.72      | -0.83      |
| 0.75                                                                                    | 1.69      | 0.81       | 0.71        | -0.27  | 2.36       | 1.81       |
| -0.78                                                                                   | -0.88     | -0.34      | -0.38       | -0.49  | -0.75      | -0.77      |
| -0.41                                                                                   | 0.78      | -0.24      | -0.87       | -0.64  | -0.18      | 0.29       |
| 0.24                                                                                    | 2.19      | -0.03      | 0.33        | -0.41  | 1.49       | 0.61       |
| -0.62                                                                                   | -0.47     | -0.32      | -0.35       | 0.37   | -0.87      | -0.49      |
| 0.30                                                                                    | 1.23      | 0.04       | -0.63       | -0.71  | 1.63       | -0.06      |
| 3.13                                                                                    | -0.17     | -0.23      | -0.86       | -1.29  | 0.09       | -0.43      |
| 1.28                                                                                    | 1.54      | 4.85       | -0.56       | -1.18  | 2.28       | 2.88       |
| -0.89                                                                                   | -0.32     | -0.19      | -0.09       | -0.27  | -0.48      | -0.40      |
| -0.38                                                                                   | -0.77     | -0.32      | 0.59        | 2.87   | -0.73      | -0.67      |
| -0.41                                                                                   | -0.60     | -0.25      | 1.14        | 0.97   | -0.59      | -0.40      |
| -0.98                                                                                   | -0.70     | -0.25      | 0.00        | 0.48   | -0.85      | -0.62      |
| 1.32                                                                                    | -1.02     | -0.34      | 0.67        | 1.76   | -0.61      | -0.47      |
| 0.96                                                                                    | -0.24     | -0.32      | -0.92       | 0.32   | -0.45      | -0.20      |
| -0.54                                                                                   | 1.65      | 0.27       | -0.89       | -0.76  | 1.54       | 2.60       |
| 1.00                                                                                    | 2.15      | 6.29       | -1.01       | -0.32  | 6.13       | 5.46       |
| 0.89                                                                                    | -0.08     | -0.05      | -0.43       | -0.66  | 0.34       | -0.23      |
| -0.17                                                                                   | -0.41     | -0.23      | -1.36       | -1.47  | -0.58      | -0.61      |
| -0.97                                                                                   | -0.94     | -0.33      | -0.91       | -0.70  | -0.77      | -0.48      |
| 0.21                                                                                    | -0.57     | -0.07      | -1.03       | -0.95  | 0.10       | 1.46       |
| 4.39                                                                                    | -0.83     | -0.33      | -0.14       | -0.26  | 1.59       | 1.67       |
| 0.45                                                                                    | -0.67     | -0.30      | -0.47       | -0.59  | -0.63      | -0.58      |
| 0.49                                                                                    | -0.71     | -0.26      | -0.51       | -0.64  | -0.69      | -0.53      |
| 0.23                                                                                    | -0.72     | -0.29      | -0.47       | 4.97   | -0.64      | -0.71      |
| -1.10                                                                                   | -1.04     | -0.36      | -0.88       | -0.38  | -0.94      | -1.00      |
| -                                                                                       | -0.37     | 0.13       | -0.06       | -0.49  | -0.47      | -0.30      |
| -                                                                                       | 0.49      | 1.06       | -0.59       | -0.98  | 1.74       | 1.38       |

|   | B_33  | C_2   |       |       |       |       |
|---|-------|-------|-------|-------|-------|-------|
| - | -0.49 | -0.31 | -0.26 | -0.36 | -0.43 | -0.67 |
| - | -0.78 | -0.23 | 0.28  | -0.91 | -0.91 | -0.49 |
| - | -0.25 | -0.17 | 3.76  | 0.59  | -0.83 | -0.65 |
| - | -0.55 | -0.31 | 0.09  | -0.01 | -0.55 | -0.54 |
| - | 0.53  | 0.25  | -0.16 | -1.50 | -0.31 | 0.34  |
| - | -0.49 | -0.35 | -0.12 | -0.69 | -0.55 | -0.85 |
| - | -0.78 | -0.31 | 0.05  | -1.73 | -0.85 | -0.71 |
| - | 0.93  | -0.21 | -0.74 | -1.07 | 0.54  | -0.14 |
| - | -0.12 | -0.26 | 0.28  | 0.38  | -0.51 | -0.67 |
| - | 1.04  | -0.16 | 0.20  | -1.24 | 0.89  | -0.10 |
| - | 0.06  | -0.26 | 0.02  | -1.23 | -0.39 | -0.49 |
| - | 1.55  | -0.14 | -0.70 | -1.00 | 0.88  | 0.16  |
| - | -0.64 | -0.30 | 0.05  | 1.16  | -0.79 | -0.63 |
| - | -0.61 | -0.30 | 0.25  | 0.25  | -0.76 | -0.36 |
| - | 0.51  | -0.24 | 0.75  | 0.59  | -0.41 | -0.02 |
| - | -0.48 | -0.30 | 1.40  | 0.36  | -0.67 | -0.77 |
| - | -0.57 | -0.56 | -0.63 | 0.09  | -0.67 | -0.66 |
| - | -0.70 | 0.43  | -0.12 | 0.43  | -0.24 | -0.43 |
| - | 0.91  | 2.70  | 8.65  | -1.02 | -1.15 | 5.73  |
| - | 0.76  | -0.20 | -0.33 | -0.35 | 1.64  | -0.47 |
| - | 1.94  | 0.08  | -0.25 | 1.20  | 1.58  | 0.88  |
| - | 2.97  | -0.48 | -0.31 | 0.50  | 0.48  | 1.32  |
| - | 0.25  | 2.45  | 5.85  | -1.07 | -1.27 | 3.73  |
| - | -0.26 | -0.65 | -0.27 | -0.71 | -1.04 | -0.62 |
| - | -0.72 | -0.10 | -0.27 | 0.21  | 0.07  | -0.53 |
| - | -0.19 | 2.74  | -0.24 | -1.06 | -0.19 | 1.12  |
| - | -0.59 | -0.41 | 0.58  | -1.13 | 0.78  | 0.60  |
| - | 0.24  | 3.23  | 0.08  | -1.09 | -1.28 | 1.95  |
| - | 0.13  | -0.96 | -0.23 | -0.61 | 1.60  | -0.81 |
| - | -0.34 | -0.62 | -0.31 | 1.45  | 2.96  | 0.93  |
| - | 1.83  | 0.07  | -0.20 | 1.66  | 1.34  | 1.66  |
| - | -0.39 | -0.29 | -0.19 | -0.12 | 0.14  | -0.30 |
| - | -0.62 | -0.89 | 0.85  | -0.88 | -1.78 | 0.94  |
| - | -0.71 | 0.38  | -0.24 | -0.39 | -0.83 | 0.36  |
| - | 0.40  | 0.67  | -0.01 | -0.34 | -0.55 | 1.87  |
| - | -0.94 | -0.92 | -0.31 | 0.58  | 0.72  | -0.79 |
| - | -0.51 | 1.58  | 0.02  | -0.26 | 0.14  | 0.91  |
| - | 0.60  | -0.43 | -0.26 | -1.17 | -1.07 | -0.30 |
| - | -0.58 | -0.31 | -0.27 | -0.90 | 0.64  | -0.09 |
| - | 1.76  | 1.09  | 0.17  | -1.14 | -0.32 | 0.82  |
| - | 1.95  | 1.73  | -0.28 | -0.68 | -0.94 | 1.13  |
| - | -0.30 | -0.20 | -0.31 | -0.53 | -0.94 | -0.63 |
| - | 0.64  | 0.43  | -0.24 | -0.58 | -0.83 | -0.13 |
| - | -0.79 | -0.39 | -0.22 | 0.51  | -1.38 | -0.58 |
| - | 1.97  | 1.80  | 7.00  | -0.62 | -0.40 | 2.69  |
| - | 0.19  | 1.25  | 9.36  | -1.18 | -1.35 | 3.05  |
| - | 0.30  | 0.20  | -0.28 | -0.69 | -1.14 | 0.24  |
| - | 0.48  | 0.53  | -0.25 | -0.66 | -0.52 | 0.21  |
| - | -0.40 | -0.02 | -0.26 | -0.46 | -0.22 | -0.39 |
| - | 0.80  | 0.74  | -0.08 | -0.73 | -0.82 | 0.31  |
| - | 1.24  | 0.33  | -0.30 | 0.01  | -0.66 | 0.03  |
| - | 1.03  | 0.04  | 0.32  | -0.56 | 0.39  | 0.75  |
| - | -0.79 | -0.71 | -0.28 | -0.60 | -1.22 | -0.84 |
| - | -0.55 | -0.44 | -0.28 | 0.77  | 1.12  | -0.76 |
| - | 0.23  | 0.40  | -0.26 | -1.06 | -0.68 | -0.20 |
| - | 0.15  | 0.47  | -0.04 | -0.96 | -0.05 | -0.18 |
| - | 0.04  | 0.04  | 0.04  | 0.04  | 0.05  | 0.05  |
| - | 0.04  | 0.03  | 0.07  | 0.04  | 0.04  | 0.05  |













































































































































































|         |      |         |         |         |         |        |
|---------|------|---------|---------|---------|---------|--------|
| 1734052 | 139  | 1026638 | 1873959 | 1687678 | 1238990 | 121924 |
|         | 1    |         |         |         |         |        |
|         |      |         |         |         |         |        |
|         | 1    |         |         |         |         |        |
| 22      | 23   | 24      | 25      | 26      | 27      | 28     |
| 22      | 23   | 24      | 25      | 26      | 27      | 28     |
| E_47    | F_2  | F_43    | F_6     | F_7     | F_8     | G_33   |
| UC      | UC   | UC      | UC      | UC      | UC      | UC     |
| 3420100 | 899  | 2100117 | 3630351 | 3796767 | 3406036 | 987631 |
| 0.07    | 0.99 | 0.29    | 0.32    | 0.18    | 0.68    | 0.60   |
| E_47    | F_2  | F_43    | F_6     | F_7     | F_8     | G_33   |
| 1686048 | 760  | 1073479 | 1756392 | 2109089 | 2167046 | 865707 |
| 393385  | 83   | 494991  | 687405  | 642121  | 571738  | 12006  |
| 82970   | 8    | 54523   | 121143  | 109242  | 54591   | 45542  |
| 75041   | 3    | 41641   | 212423  | 151317  | 99440   | 5799   |
| 67885   | 8    | 69737   | 154534  | 153536  | 103282  | 20023  |
| 98228   | 14   | 76677   | 195430  | 169720  | 125410  | 9164   |
| 221090  | 3    | 27687   | 9242    | 14625   | 9248    | 1222   |
| 103902  | 3    | 23181   | 55361   | 45205   | 18631   | 5116   |
| 125143  | 1    | 2006    | 1948    | 4365    | 1630    | 204    |
| 70550   | 1    | 13874   | 11730   | 15125   | 9109    | 290    |
| 32415   | 1    | 27676   | 20299   | 18237   | 9862    | 1294   |
| 14010   | 2    | 27254   | 17062   | 20395   | 12986   | 343    |
| 33546   | 1    | 10282   | 34885   | 34820   | 21490   | 1422   |
| 20989   | 0    | 16434   | 22591   | 21334   | 10088   | 995    |
| 15421   | 3    | 11363   | 26166   | 30912   | 30356   | 1976   |
| 28940   | 1    | 6158    | 3952    | 4627    | 1461    | 351    |
| 13776   | 1    | 9179    | 39459   | 27487   | 24425   | 196    |
| 24133   | 0    | 3570    | 2432    | 2128    | 840     | 387    |
| 14832   | 1    | 6400    | 11801   | 11726   | 6357    | 363    |
| 15649   | 0    | 3023    | 5932    | 5481    | 2466    | 284    |
| 9752    | 0    | 7433    | 14364   | 12199   | 6199    | 886    |
| 9166    | 0    | 3726    | 12856   | 11905   | 5736    | 228    |
| 5987    | 0    | 4327    | 7234    | 7197    | 4049    | 254    |
| 9506    | 1    | 6108    | 7834    | 6704    | 2699    | 243    |
| 13140   | 0    | 808     | 4539    | 3930    | 615     | 962    |
| 12829   | 1    | 2190    | 1382    | 1354    | 842     | 226    |
| 9001    | 0    | 3253    | 10683   | 7900    | 4933    | 51     |
| 5532    | 0    | 4049    | 10769   | 13171   | 13012   | 478    |
| 10349   | 0    | 4272    | 2890    | 2807    | 1132    | 133    |
| 7445    | 0    | 4213    | 4390    | 5071    | 2609    | 428    |
| 3536    | 0    | 5401    | 9991    | 7926    | 4721    | 281    |
| 9235    | 1    | 1715    | 5461    | 4259    | 1824    | 284    |
| 4999    | 0    | 2298    | 13143   | 10960   | 5985    | 808    |
| 13028   | 0    | 904     | 1640    | 1939    | 883     | 106    |
| 12790   | 0    | 847     | 581     | 1385    | 711     | 69     |
| 6853    | 0    | 3974    | 4171    | 4801    | 2471    | 402    |
| 2996    | 0    | 1863    | 3709    | 5120    | 4332    | 815    |
| 4826    | 0    | 2779    | 2742    | 3385    | 1427    | 470    |
| 3812    | 0    | 2200    | 1180    | 1672    | 977     | 290    |
| 2967    | 0    | 1642    | 3254    | 3569    | 2541    | 1069   |
| 3747    | 0    | 695     | 18645   | 5740    | 3502    | 485    |
| 2650    | 0    | 913     | 8974    | 6310    | 3723    | 756    |
| 2571    | 0    | 2464    | 5373    | 4777    | 4227    | 174    |
| 3028    | 0    | 1463    | 3363    | 2935    | 2596    | 385    |
| 6940    | 0    | 483     | 243     | 482     | 260     | 57     |
| 2855    | 0    | 645     | 3004    | 2416    | 1529    | 145    |

|      |   |      |      |      |      |     |
|------|---|------|------|------|------|-----|
| 2658 | 0 | 1824 | 4100 | 3480 | 2045 | 123 |
| 2161 | 0 | 1155 | 2707 | 2062 | 1123 | 106 |
| 2225 | 0 | 1273 | 6038 | 3801 | 3568 | 67  |
| 7803 | 0 | 253  | 106  | 240  | 137  | 12  |
| 8507 | 0 | 407  | 746  | 1137 | 265  | 6   |
| 269  | 0 | 569  | 3158 | 1497 | 832  | 253 |
| 1870 | 0 | 521  | 1146 | 952  | 446  | 176 |
| 1176 | 0 | 861  | 1629 | 2190 | 1899 | 152 |
| 3091 | 0 | 932  | 1386 | 1082 | 370  | 36  |
| 2787 | 1 | 324  | 2003 | 2149 | 1287 | 1   |
| 6612 | 0 | 152  | 85   | 164  | 125  | 4   |
| 1483 | 0 | 484  | 855  | 997  | 559  | 129 |
| 2234 | 0 | 308  | 2417 | 1667 | 759  | 58  |
| 1143 | 0 | 1220 | 1339 | 1498 | 1161 | 47  |
| 686  | 0 | 600  | 3727 | 2354 | 959  | 559 |
| 901  | 0 | 674  | 1470 | 1318 | 736  | 103 |
| 1876 | 0 | 344  | 1493 | 1073 | 664  | 17  |
| 2445 | 0 | 104  | 37   | 57   | 30   | 16  |
| 5997 | 0 | 46   | 32   | 67   | 60   | 7   |
| 925  | 0 | 2043 | 1434 | 1742 | 1730 | 86  |
| 1480 | 0 | 376  | 360  | 531  | 286  | 41  |
| 2074 | 0 | 215  | 280  | 427  | 254  | 13  |
| 2037 | 0 | 207  | 207  | 330  | 159  | 21  |
| 1577 | 0 | 250  | 619  | 510  | 345  | 26  |
| 541  | 0 | 598  | 288  | 253  | 116  | 29  |
| 582  | 0 | 500  | 1329 | 1153 | 732  | 101 |
| 610  | 0 | 884  | 1378 | 1418 | 1478 | 45  |
| 1348 | 0 | 248  | 95   | 173  | 47   | 32  |
| 977  | 0 | 430  | 704  | 573  | 316  | 8   |
| 1216 | 0 | 249  | 567  | 509  | 180  | 41  |
| 175  | 1 | 263  | 2726 | 1012 | 608  | 98  |
| 784  | 0 | 264  | 1000 | 895  | 584  | 4   |
| 727  | 0 | 303  | 971  | 574  | 332  | 189 |
| 460  | 0 | 304  | 1677 | 1299 | 918  | 69  |
| 296  | 0 | 382  | 505  | 755  | 528  | 46  |
| 805  | 0 | 258  | 390  | 485  | 234  | 25  |
| 578  | 0 | 409  | 1436 | 1034 | 977  | 9   |
| 420  | 0 | 544  | 805  | 949  | 668  | 115 |
| 869  | 0 | 194  | 216  | 410  | 282  | 3   |
| 1038 | 0 | 100  | 263  | 236  | 156  | 37  |
| 443  | 0 | 154  | 966  | 716  | 481  | 10  |
| 343  | 0 | 538  | 829  | 798  | 807  | 49  |
| 1028 | 0 | 104  | 96   | 131  | 37   | 9   |
| 664  | 0 | 304  | 356  | 267  | 135  | 28  |
| 240  | 0 | 243  | 1704 | 805  | 366  | 137 |
| 518  | 0 | 448  | 970  | 706  | 377  | 20  |
| 1448 | 0 | 37   | 2    | 13   | 18   | 2   |
| 648  | 0 | 103  | 522  | 558  | 250  | 7   |
| 391  | 0 | 176  | 266  | 388  | 117  | 12  |
| 778  | 0 | 64   | 41   | 65   | 40   | 4   |
| 702  | 0 | 130  | 149  | 205  | 119  | 11  |
| 242  | 0 | 335  | 675  | 598  | 441  | 40  |
| 291  | 0 | 207  | 608  | 577  | 345  | 29  |
| 216  | 0 | 255  | 663  | 658  | 404  | 31  |
| 539  | 0 | 81   | 29   | 59   | 28   | 5   |
| 185  | 0 | 47   | 246  | 273  | 182  | 9   |
| 375  | 0 | 195  | 362  | 426  | 145  | 17  |
| 183  | 0 | 247  | 542  | 557  | 522  | 18  |
| 250  | 0 | 84   | 301  | 261  | 72   | 48  |

|     |   |     |     |     |     |    |
|-----|---|-----|-----|-----|-----|----|
| 370 | 0 | 136 | 40  | 96  | 82  | 4  |
| 529 | 0 | 42  | 37  | 85  | 34  | 4  |
| 215 | 0 | 87  | 392 | 311 | 191 | 39 |
| 349 | 0 | 128 | 173 | 212 | 132 | 69 |
| 429 | 0 | 73  | 65  | 120 | 102 | 8  |
| 575 | 0 | 49  | 159 | 160 | 87  | 8  |
| 503 | 0 | 117 | 202 | 172 | 61  | 14 |
| 207 | 0 | 145 | 487 | 518 | 270 | 16 |
| 131 | 0 | 36  | 235 | 202 | 71  | 21 |
| 374 | 0 | 70  | 58  | 100 | 56  | 5  |
| 234 | 0 | 43  | 582 | 305 | 196 | 10 |
| 109 | 0 | 136 | 658 | 368 | 230 | 33 |
| 307 | 0 | 63  | 200 | 219 | 67  | 7  |
| 275 | 0 | 92  | 156 | 288 | 108 | 16 |
| 275 | 0 | 92  | 156 | 288 | 108 | 16 |
| 129 | 0 | 43  | 126 | 154 | 69  | 28 |
| 137 | 0 | 75  | 185 | 207 | 190 | 1  |
| 126 | 0 | 114 | 226 | 155 | 150 | 0  |
| 85  | 0 | 13  | 311 | 131 | 51  | 2  |
| 295 | 0 | 40  | 238 | 166 | 62  | 4  |
| 698 | 0 | 11  | 6   | 18  | 10  | 0  |
| 132 | 0 | 118 | 299 | 338 | 149 | 20 |
| 94  | 0 | 71  | 143 | 146 | 129 | 20 |
| 123 | 0 | 85  | 289 | 282 | 195 | 0  |
| 112 | 0 | 42  | 243 | 226 | 167 | 56 |
| 75  | 0 | 44  | 346 | 357 | 149 | 84 |
| 404 | 0 | 53  | 74  | 51  | 31  | 1  |
| 174 | 0 | 41  | 261 | 119 | 33  | 7  |
| 106 | 0 | 62  | 131 | 150 | 58  | 9  |
| 95  | 0 | 43  | 165 | 141 | 92  | 7  |
| 209 | 0 | 23  | 49  | 48  | 42  | 1  |
| 88  | 0 | 78  | 153 | 130 | 81  | 1  |
| 169 | 0 | 77  | 128 | 119 | 79  | 0  |
| 131 | 0 | 59  | 123 | 172 | 110 | 3  |
| 169 | 0 | 41  | 131 | 135 | 77  | 3  |
| 119 | 0 | 41  | 172 | 102 | 101 | 10 |
| 212 | 0 | 41  | 165 | 134 | 106 | 2  |
| 111 | 0 | 43  | 96  | 94  | 70  | 7  |
| 77  | 0 | 12  | 340 | 174 | 136 | 12 |
| 154 | 0 | 32  | 128 | 106 | 68  | 15 |
| 256 | 0 | 12  | 1   | 15  | 6   | 3  |
| 66  | 0 | 99  | 92  | 117 | 112 | 5  |
| 89  | 0 | 39  | 202 | 85  | 89  | 4  |
| 225 | 0 | 35  | 90  | 44  | 21  | 10 |
| 74  | 0 | 77  | 58  | 61  | 48  | 13 |
| 67  | 0 | 34  | 84  | 89  | 75  | 9  |
| 192 | 0 | 40  | 60  | 44  | 21  | 6  |
| 150 | 0 | 28  | 21  | 41  | 26  | 3  |
| 71  | 0 | 18  | 135 | 67  | 22  | 0  |
| 96  | 0 | 24  | 166 | 104 | 53  | 6  |
| 151 | 0 | 6   | 286 | 241 | 137 | 0  |
| 46  | 0 | 83  | 55  | 80  | 100 | 13 |
| 36  | 0 | 28  | 101 | 122 | 88  | 51 |
| 33  | 0 | 42  | 133 | 67  | 80  | 5  |
| 70  | 0 | 40  | 72  | 83  | 86  | 1  |
| 101 | 0 | 23  | 110 | 149 | 140 | 2  |
| 337 | 0 | 9   | 5   | 9   | 5   | 0  |
| 34  | 0 | 14  | 90  | 79  | 30  | 2  |
| 32  | 0 | 46  | 139 | 64  | 101 | 20 |

|     |   |    |     |     |     |    |
|-----|---|----|-----|-----|-----|----|
| 124 | 0 | 22 | 38  | 34  | 10  | 1  |
| 87  | 0 | 25 | 42  | 33  | 13  | 3  |
| 75  | 0 | 62 | 96  | 80  | 78  | 3  |
| 54  | 0 | 31 | 66  | 60  | 69  | 6  |
| 53  | 0 | 26 | 78  | 96  | 102 | 3  |
| 259 | 0 | 4  | 14  | 15  | 9   | 1  |
| 44  | 0 | 36 | 57  | 67  | 43  | 1  |
| 62  | 0 | 19 | 72  | 83  | 38  | 6  |
| 47  | 0 | 73 | 62  | 43  | 26  | 2  |
| 33  | 0 | 62 | 103 | 95  | 69  | 2  |
| 85  | 0 | 29 | 49  | 35  | 26  | 1  |
| 247 | 0 | 6  | 32  | 26  | 5   | 2  |
| 56  | 0 | 30 | 139 | 79  | 96  | 25 |
| 4   | 0 | 20 | 56  | 51  | 50  | 9  |
| 100 | 0 | 39 | 43  | 54  | 34  | 7  |
| 52  | 0 | 9  | 57  | 42  | 28  | 1  |
| 7   | 0 | 16 | 140 | 75  | 53  | 4  |
| 52  | 0 | 42 | 56  | 93  | 40  | 0  |
| 101 | 0 | 17 | 13  | 17  | 6   | 2  |
| 9   | 0 | 23 | 90  | 75  | 61  | 5  |
| 134 | 0 | 13 | 15  | 22  | 10  | 3  |
| 21  | 0 | 71 | 84  | 85  | 120 | 3  |
| 55  | 0 | 20 | 93  | 103 | 70  | 9  |
| 96  | 0 | 16 | 12  | 17  | 6   | 2  |
| 6   | 0 | 18 | 140 | 50  | 18  | 4  |
| 41  | 0 | 21 | 88  | 103 | 47  | 1  |
| 79  | 0 | 28 | 44  | 50  | 20  | 3  |
| 10  | 0 | 1  | 5   | 0   | 14  | 0  |
| 67  | 0 | 11 | 0   | 6   | 3   | 1  |
| 54  | 0 | 25 | 54  | 51  | 21  | 1  |
| 31  | 0 | 25 | 148 | 74  | 40  | 15 |
| 34  | 0 | 42 | 41  | 33  | 19  | 0  |
| 72  | 0 | 16 | 96  | 35  | 36  | 7  |
| 330 | 0 | 4  | 30  | 20  | 3   | 0  |
| 58  | 0 | 29 | 60  | 82  | 53  | 2  |
| 36  | 0 | 10 | 38  | 60  | 29  | 1  |
| 29  | 0 | 23 | 35  | 56  | 57  | 1  |
| 55  | 0 | 9  | 156 | 87  | 39  | 10 |
| 27  | 0 | 43 | 19  | 52  | 13  | 1  |
| 47  | 0 | 8  | 92  | 85  | 37  | 9  |
| 42  | 0 | 29 | 61  | 43  | 30  | 3  |
| 52  | 0 | 4  | 4   | 13  | 15  | 0  |
| 8   | 0 | 12 | 138 | 43  | 41  | 0  |
| 33  | 0 | 17 | 57  | 59  | 30  | 1  |
| 39  | 0 | 11 | 65  | 47  | 20  | 4  |
| 25  | 0 | 15 | 173 | 65  | 49  | 2  |
| 65  | 0 | 22 | 53  | 48  | 48  | 5  |
| 39  | 0 | 14 | 98  | 70  | 43  | 7  |
| 30  | 0 | 10 | 52  | 22  | 12  | 3  |
| 36  | 0 | 14 | 28  | 13  | 9   | 3  |
| 22  | 0 | 7  | 46  | 45  | 33  | 4  |
| 61  | 0 | 20 | 32  | 44  | 29  | 1  |
| 38  | 0 | 17 | 49  | 34  | 15  | 3  |
| 48  | 0 | 19 | 42  | 34  | 20  | 1  |
| 42  | 0 | 10 | 58  | 25  | 15  | 0  |
| 96  | 0 | 0  | 0   | 2   | 1   | 0  |
| 30  | 0 | 4  | 34  | 28  | 9   | 3  |
| 108 | 0 | 5  | 6   | 5   | 8   | 4  |
| 16  | 0 | 22 | 15  | 36  | 30  | 2  |

|    |   |    |    |    |    |   |
|----|---|----|----|----|----|---|
| 41 | 0 | 7  | 12 | 24 | 20 | 3 |
| 16 | 0 | 6  | 24 | 37 | 16 | 6 |
| 3  | 0 | 7  | 58 | 17 | 10 | 0 |
| 28 | 0 | 17 | 45 | 42 | 54 | 5 |
| 19 | 0 | 16 | 60 | 64 | 55 | 3 |
| 28 | 0 | 10 | 39 | 47 | 45 | 0 |
| 24 | 0 | 13 | 50 | 36 | 15 | 9 |
| 19 | 0 | 10 | 14 | 26 | 18 | 0 |
| 45 | 0 | 10 | 9  | 8  | 6  | 0 |
| 34 | 0 | 24 | 35 | 52 | 30 | 4 |
| 85 | 0 | 2  | 2  | 0  | 0  | 1 |
| 19 | 0 | 8  | 38 | 44 | 28 | 1 |
| 35 | 0 | 11 | 17 | 23 | 9  | 0 |
| 28 | 0 | 18 | 21 | 31 | 20 | 0 |
| 22 | 0 | 6  | 33 | 31 | 15 | 0 |
| 30 | 0 | 0  | 10 | 6  | 1  | 1 |
| 25 | 0 | 7  | 19 | 11 | 6  | 0 |
| 24 | 0 | 6  | 26 | 24 | 27 | 1 |
| 4  | 0 | 10 | 24 | 19 | 9  | 1 |
| 14 | 0 | 6  | 13 | 14 | 2  | 0 |
| 57 | 0 | 1  | 1  | 3  | 2  | 1 |
| 35 | 0 | 1  | 25 | 23 | 9  | 3 |
| 35 | 0 | 1  | 25 | 23 | 9  | 3 |
| 3  | 0 | 7  | 65 | 17 | 23 | 4 |
| 21 | 0 | 9  | 38 | 41 | 32 | 1 |
| 49 | 0 | 5  | 9  | 19 | 13 | 3 |
| 4  | 0 | 5  | 59 | 22 | 9  | 0 |
| 48 | 0 | 6  | 19 | 11 | 7  | 0 |
| 21 | 0 | 4  | 35 | 24 | 10 | 1 |
| 8  | 0 | 17 | 6  | 9  | 7  | 0 |
| 27 | 0 | 3  | 14 | 14 | 6  | 0 |
| 29 | 0 | 4  | 21 | 35 | 51 | 0 |
| 27 | 0 | 2  | 12 | 7  | 2  | 0 |
| 17 | 0 | 13 | 15 | 10 | 8  | 1 |
| 37 | 0 | 5  | 57 | 44 | 33 | 0 |
| 14 | 0 | 5  | 12 | 21 | 14 | 0 |
| 61 | 0 | 0  | 1  | 0  | 0  | 1 |
| 22 | 0 | 8  | 12 | 13 | 7  | 0 |
| 23 | 0 | 11 | 9  | 8  | 3  | 2 |
| 13 | 0 | 8  | 71 | 46 | 25 | 0 |
| 7  | 0 | 15 | 15 | 13 | 20 | 2 |
| 21 | 0 | 10 | 8  | 8  | 3  | 2 |
| 7  | 0 | 10 | 39 | 28 | 7  | 2 |
| 17 | 0 | 7  | 39 | 41 | 35 | 8 |
| 10 | 0 | 3  | 16 | 7  | 9  | 0 |
| 11 | 0 | 11 | 19 | 20 | 24 | 1 |
| 73 | 0 | 1  | 0  | 0  | 0  | 0 |
| 16 | 0 | 8  | 41 | 33 | 43 | 0 |
| 14 | 0 | 4  | 14 | 14 | 22 | 5 |
| 11 | 0 | 3  | 17 | 13 | 16 | 0 |
| 3  | 0 | 3  | 34 | 17 | 13 | 0 |
| 29 | 0 | 7  | 17 | 19 | 7  | 1 |
| 36 | 0 | 0  | 1  | 2  | 0  | 1 |
| 12 | 0 | 3  | 18 | 13 | 7  | 1 |
| 18 | 0 | 3  | 8  | 4  | 0  | 0 |
| 0  | 0 | 0  | 0  | 0  | 0  | 0 |
| 15 | 0 | 14 | 38 | 31 | 22 | 4 |
| 11 | 0 | 17 | 14 | 4  | 3  | 3 |
| 8  | 0 | 3  | 12 | 15 | 23 | 5 |

|    |   |    |    |    |    |   |
|----|---|----|----|----|----|---|
| 2  | 0 | 1  | 32 | 17 | 9  | 1 |
| 5  | 0 | 12 | 26 | 16 | 7  | 0 |
| 4  | 0 | 4  | 48 | 15 | 7  | 0 |
| 11 | 0 | 4  | 32 | 21 | 7  | 0 |
| 4  | 0 | 14 | 30 | 24 | 23 | 4 |
| 10 | 0 | 10 | 17 | 13 | 9  | 1 |
| 14 | 0 | 3  | 8  | 3  | 0  | 0 |
| 4  | 0 | 3  | 36 | 7  | 4  | 0 |
| 14 | 0 | 3  | 2  | 1  | 0  | 0 |
| 34 | 0 | 3  | 0  | 6  | 0  | 0 |
| 6  | 0 | 5  | 12 | 4  | 1  | 0 |
| 6  | 0 | 5  | 33 | 25 | 25 | 2 |
| 21 | 0 | 5  | 7  | 18 | 5  | 0 |
| 12 | 0 | 0  | 41 | 49 | 36 | 0 |
| 3  | 0 | 3  | 39 | 11 | 12 | 2 |
| 34 | 0 | 3  | 8  | 6  | 3  | 1 |
| 10 | 0 | 10 | 19 | 14 | 14 | 2 |
| 18 | 0 | 0  | 10 | 7  | 4  | 0 |
| 12 | 0 | 6  | 16 | 9  | 5  | 0 |
| 4  | 0 | 0  | 10 | 3  | 0  | 0 |
| 0  | 0 | 5  | 43 | 20 | 7  | 0 |
| 14 | 0 | 0  | 16 | 23 | 12 | 0 |
| 17 | 0 | 0  | 16 | 29 | 15 | 0 |
| 2  | 0 | 7  | 6  | 7  | 15 | 0 |
| 11 | 0 | 5  | 8  | 7  | 1  | 0 |
| 14 | 0 | 1  | 42 | 16 | 14 | 2 |
| 10 | 0 | 9  | 31 | 10 | 36 | 0 |
| 6  | 0 | 8  | 26 | 23 | 29 | 0 |
| 4  | 0 | 2  | 20 | 4  | 6  | 1 |
| 13 | 0 | 3  | 3  | 4  | 4  | 0 |
| 6  | 0 | 11 | 21 | 11 | 4  | 2 |
| 33 | 0 | 2  | 1  | 3  | 1  | 0 |
| 19 | 0 | 5  | 0  | 1  | 0  | 0 |
| 8  | 0 | 2  | 12 | 11 | 7  | 0 |
| 10 | 0 | 4  | 3  | 3  | 1  | 0 |
| 5  | 0 | 5  | 10 | 7  | 5  | 0 |
| 8  | 0 | 2  | 31 | 5  | 7  | 0 |
| 8  | 0 | 2  | 12 | 8  | 10 | 0 |
| 21 | 0 | 3  | 12 | 8  | 5  | 0 |
| 12 | 0 | 2  | 14 | 20 | 14 | 0 |
| 14 | 0 | 2  | 5  | 4  | 1  | 0 |
| 9  | 0 | 2  | 11 | 18 | 8  | 0 |
| 0  | 0 | 5  | 27 | 16 | 10 | 0 |
| 5  | 0 | 3  | 13 | 15 | 5  | 1 |
| 3  | 0 | 0  | 15 | 6  | 3  | 0 |
| 0  | 0 | 3  | 15 | 10 | 1  | 2 |
| 12 | 0 | 6  | 12 | 14 | 15 | 0 |
| 9  | 0 | 8  | 6  | 13 | 7  | 1 |
| 3  | 0 | 10 | 5  | 4  | 11 | 0 |
| 5  | 0 | 3  | 16 | 9  | 3  | 3 |
| 2  | 0 | 7  | 23 | 12 | 16 | 1 |
| 25 | 0 | 1  | 4  | 1  | 1  | 0 |
| 7  | 0 | 3  | 21 | 17 | 9  | 0 |
| 18 | 0 | 3  | 2  | 2  | 2  | 1 |
| 10 | 0 | 2  | 11 | 5  | 3  | 0 |
| 9  | 0 | 3  | 12 | 12 | 7  | 0 |
| 4  | 0 | 3  | 14 | 13 | 5  | 0 |
| 29 | 0 | 4  | 1  | 0  | 1  | 0 |
| 6  | 0 | 4  | 5  | 9  | 7  | 0 |



|    |   |    |    |    |    |   |
|----|---|----|----|----|----|---|
| 7  | 0 | 9  | 13 | 11 | 4  | 0 |
| 7  | 0 | 5  | 16 | 12 | 8  | 0 |
| 8  | 0 | 6  | 23 | 14 | 4  | 0 |
| 6  | 0 | 2  | 7  | 4  | 6  | 3 |
| 3  | 0 | 5  | 15 | 11 | 10 | 0 |
| 7  | 0 | 2  | 26 | 20 | 5  | 0 |
| 5  | 0 | 2  | 5  | 11 | 17 | 0 |
| 6  | 0 | 3  | 1  | 2  | 0  | 0 |
| 6  | 0 | 1  | 6  | 4  | 3  | 0 |
| 8  | 0 | 2  | 4  | 10 | 4  | 0 |
| 7  | 0 | 3  | 11 | 7  | 4  | 0 |
| 21 | 0 | 0  | 10 | 7  | 2  | 0 |
| 7  | 0 | 5  | 4  | 14 | 1  | 2 |
| 17 | 0 | 0  | 0  | 1  | 0  | 1 |
| 7  | 0 | 3  | 6  | 3  | 2  | 0 |
| 4  | 0 | 0  | 1  | 1  | 5  | 1 |
| 4  | 0 | 1  | 2  | 4  | 0  | 0 |
| 2  | 0 | 5  | 5  | 6  | 2  | 0 |
| 12 | 0 | 0  | 0  | 0  | 1  | 0 |
| 3  | 0 | 0  | 5  | 3  | 3  | 0 |
| 10 | 0 | 5  | 5  | 1  | 1  | 0 |
| 9  | 0 | 2  | 5  | 9  | 2  | 0 |
| 4  | 0 | 6  | 6  | 5  | 3  | 0 |
| 7  | 0 | 10 | 6  | 3  | 4  | 0 |
| 4  | 0 | 6  | 4  | 7  | 2  | 1 |
| 4  | 0 | 3  | 10 | 10 | 10 | 0 |
| 13 | 0 | 3  | 1  | 4  | 0  | 0 |
| 19 | 0 | 1  | 0  | 0  | 1  | 0 |
| 5  | 0 | 1  | 13 | 7  | 1  | 0 |
| 3  | 0 | 0  | 2  | 4  | 2  | 0 |
| 2  | 0 | 6  | 3  | 3  | 3  | 0 |
| 6  | 0 | 0  | 8  | 2  | 3  | 0 |
| 4  | 0 | 0  | 3  | 4  | 6  | 0 |
| 3  | 0 | 6  | 17 | 7  | 4  | 1 |
| 9  | 0 | 0  | 0  | 1  | 2  | 0 |
| 2  | 0 | 2  | 15 | 5  | 2  | 1 |
| 7  | 0 | 2  | 2  | 7  | 2  | 0 |
| 3  | 0 | 3  | 5  | 8  | 4  | 0 |
| 2  | 0 | 4  | 6  | 4  | 3  | 1 |
| 3  | 0 | 4  | 11 | 5  | 11 | 1 |
| 2  | 0 | 0  | 8  | 3  | 3  | 0 |
| 2  | 0 | 2  | 6  | 2  | 1  | 0 |
| 0  | 0 | 0  | 14 | 4  | 1  | 0 |
| 4  | 0 | 3  | 8  | 4  | 1  | 1 |
| 5  | 0 | 2  | 5  | 8  | 2  | 0 |
| 5  | 0 | 0  | 2  | 5  | 0  | 0 |
| 6  | 0 | 1  | 3  | 4  | 1  | 0 |
| 6  | 0 | 3  | 5  | 5  | 9  | 0 |
| 9  | 0 | 0  | 0  | 3  | 1  | 0 |
| 1  | 0 | 1  | 0  | 0  | 2  | 0 |
| 2  | 0 | 0  | 9  | 1  | 5  | 1 |
| 3  | 0 | 2  | 7  | 3  | 2  | 1 |
| 14 | 0 | 0  | 1  | 1  | 1  | 0 |
| 3  | 0 | 1  | 5  | 3  | 2  | 0 |
| 10 | 0 | 2  | 4  | 1  | 2  | 1 |
| 3  | 0 | 0  | 2  | 3  | 2  | 1 |
| 6  | 0 | 1  | 6  | 0  | 1  | 0 |
| 2  | 0 | 1  | 6  | 6  | 5  | 0 |
| 10 | 0 | 5  | 20 | 5  | 0  | 0 |

|    |   |   |    |    |   |   |
|----|---|---|----|----|---|---|
| 5  | 0 | 1 | 2  | 1  | 0 | 0 |
| 0  | 0 | 2 | 4  | 6  | 2 | 0 |
| 7  | 0 | 1 | 1  | 0  | 0 | 0 |
| 3  | 0 | 1 | 0  | 1  | 0 | 1 |
| 3  | 0 | 1 | 3  | 6  | 2 | 0 |
| 1  | 0 | 3 | 15 | 4  | 7 | 0 |
| 4  | 0 | 4 | 6  | 8  | 3 | 0 |
| 8  | 0 | 0 | 2  | 0  | 0 | 0 |
| 4  | 0 | 0 | 6  | 10 | 2 | 0 |
| 3  | 0 | 1 | 9  | 5  | 2 | 0 |
| 2  | 0 | 0 | 0  | 0  | 0 | 0 |
| 16 | 0 | 0 | 0  | 0  | 0 | 0 |
| 14 | 0 | 0 | 0  | 0  | 0 | 0 |
| 7  | 0 | 0 | 2  | 4  | 1 | 0 |
| 10 | 0 | 1 | 6  | 3  | 5 | 0 |
| 0  | 0 | 1 | 11 | 3  | 1 | 0 |
| 2  | 0 | 3 | 1  | 1  | 6 | 0 |
| 2  | 0 | 1 | 1  | 5  | 4 | 2 |
| 16 | 0 | 0 | 0  | 1  | 0 | 0 |
| 3  | 0 | 1 | 0  | 0  | 0 | 0 |
| 2  | 0 | 0 | 3  | 2  | 1 | 0 |
| 8  | 0 | 0 | 0  | 1  | 0 | 0 |
| 0  | 0 | 1 | 12 | 2  | 2 | 1 |
| 4  | 0 | 2 | 9  | 7  | 3 | 0 |
| 5  | 0 | 0 | 5  | 3  | 9 | 0 |
| 18 | 0 | 0 | 0  | 1  | 0 | 0 |
| 10 | 0 | 1 | 5  | 5  | 6 | 0 |
| 3  | 0 | 2 | 0  | 0  | 0 | 0 |
| 4  | 0 | 2 | 4  | 3  | 1 | 0 |
| 6  | 0 | 1 | 2  | 1  | 0 | 0 |
| 10 | 0 | 0 | 0  | 0  | 2 | 0 |
| 5  | 0 | 2 | 5  | 8  | 0 | 0 |
| 2  | 0 | 2 | 5  | 6  | 3 | 0 |
| 5  | 0 | 0 | 14 | 5  | 3 | 0 |
| 7  | 0 | 1 | 2  | 0  | 1 | 0 |
| 3  | 0 | 1 | 2  | 4  | 5 | 0 |
| 6  | 0 | 1 | 4  | 2  | 2 | 0 |
| 3  | 0 | 1 | 7  | 5  | 4 | 0 |
| 7  | 0 | 1 | 5  | 7  | 0 | 0 |
| 0  | 0 | 0 | 7  | 1  | 1 | 0 |
| 6  | 0 | 1 | 0  | 1  | 0 | 0 |
| 1  | 0 | 1 | 2  | 4  | 1 | 1 |
| 4  | 0 | 2 | 6  | 2  | 3 | 0 |
| 2  | 0 | 0 | 2  | 4  | 3 | 0 |
| 2  | 0 | 0 | 1  | 2  | 1 | 0 |
| 1  | 0 | 1 | 1  | 0  | 1 | 0 |
| 6  | 0 | 1 | 0  | 1  | 0 | 0 |
| 3  | 0 | 1 | 2  | 0  | 0 | 0 |
| 0  | 0 | 2 | 2  | 2  | 3 | 0 |
| 2  | 0 | 2 | 2  | 2  | 2 | 1 |
| 3  | 0 | 2 | 2  | 3  | 1 | 1 |
| 0  | 0 | 0 | 0  | 0  | 0 | 0 |
| 2  | 0 | 1 | 1  | 7  | 2 | 0 |
| 2  | 0 | 0 | 1  | 2  | 0 | 0 |
| 3  | 0 | 0 | 3  | 4  | 1 | 0 |
| 4  | 0 | 0 | 2  | 1  | 3 | 1 |
| 0  | 0 | 1 | 2  | 3  | 3 | 0 |
| 2  | 0 | 1 | 3  | 0  | 3 | 0 |
| 0  | 0 | 2 | 4  | 5  | 6 | 0 |

|   |   |   |    |   |   |   |
|---|---|---|----|---|---|---|
| 4 | 0 | 3 | 1  | 5 | 3 | 0 |
| 1 | 0 | 1 | 5  | 4 | 6 | 0 |
| 2 | 0 | 2 | 3  | 3 | 2 | 0 |
| 1 | 0 | 2 | 2  | 1 | 1 | 1 |
| 3 | 0 | 2 | 1  | 5 | 1 | 0 |
| 6 | 0 | 0 | 0  | 0 | 0 | 0 |
| 1 | 0 | 1 | 3  | 1 | 6 | 0 |
| 3 | 0 | 1 | 0  | 1 | 0 | 0 |
| 0 | 0 | 0 | 7  | 4 | 1 | 0 |
| 1 | 0 | 1 | 1  | 0 | 1 | 0 |
| 1 | 0 | 0 | 0  | 1 | 1 | 0 |
| 4 | 0 | 0 | 4  | 0 | 0 | 0 |
| 4 | 0 | 1 | 0  | 1 | 1 | 0 |
| 2 | 0 | 0 | 1  | 2 | 6 | 0 |
| 6 | 0 | 0 | 1  | 1 | 0 | 0 |
| 2 | 0 | 0 | 0  | 0 | 1 | 0 |
| 4 | 0 | 0 | 1  | 3 | 2 | 2 |
| 1 | 0 | 0 | 1  | 0 | 0 | 0 |
| 6 | 0 | 0 | 0  | 1 | 0 | 0 |
| 1 | 0 | 0 | 1  | 3 | 1 | 0 |
| 3 | 0 | 1 | 0  | 1 | 1 | 0 |
| 3 | 0 | 1 | 0  | 0 | 0 | 0 |
| 6 | 0 | 0 | 0  | 1 | 0 | 0 |
| 1 | 0 | 1 | 2  | 1 | 3 | 0 |
| 1 | 0 | 0 | 4  | 7 | 4 | 0 |
| 1 | 0 | 1 | 2  | 1 | 1 | 0 |
| 2 | 0 | 0 | 11 | 3 | 3 | 0 |
| 0 | 0 | 2 | 5  | 2 | 4 | 0 |
| 4 | 0 | 0 | 0  | 0 | 0 | 0 |
| 4 | 0 | 0 | 0  | 1 | 0 | 0 |
| 0 | 0 | 0 | 0  | 0 | 0 | 0 |
| 1 | 0 | 0 | 4  | 4 | 0 | 0 |
| 4 | 0 | 0 | 3  | 0 | 2 | 0 |
| 0 | 0 | 1 | 5  | 1 | 0 | 1 |
| 1 | 0 | 0 | 0  | 1 | 4 | 0 |
| 1 | 0 | 0 | 0  | 3 | 3 | 0 |
| 2 | 0 | 0 | 2  | 5 | 1 | 0 |
| 4 | 0 | 0 | 1  | 2 | 0 | 0 |
| 3 | 0 | 0 | 1  | 1 | 2 | 0 |
| 1 | 0 | 1 | 4  | 2 | 5 | 0 |
| 1 | 0 | 0 | 1  | 0 | 0 | 0 |
| 2 | 0 | 0 | 4  | 0 | 4 | 0 |
| 2 | 0 | 1 | 5  | 4 | 3 | 0 |
| 1 | 0 | 0 | 4  | 3 | 3 | 0 |
| 0 | 0 | 0 | 6  | 4 | 1 | 0 |
| 2 | 0 | 1 | 2  | 2 | 2 | 0 |
| 1 | 0 | 0 | 9  | 3 | 1 | 0 |
| 1 | 0 | 0 | 0  | 1 | 1 | 0 |
| 2 | 0 | 3 | 3  | 4 | 4 | 0 |
| 2 | 0 | 1 | 0  | 1 | 2 | 0 |
| 1 | 0 | 0 | 7  | 0 | 1 | 0 |
| 3 | 0 | 1 | 0  | 1 | 0 | 0 |
| 1 | 0 | 1 | 0  | 1 | 0 | 0 |
| 2 | 0 | 0 | 0  | 2 | 2 | 0 |
| 0 | 0 | 0 | 0  | 1 | 0 | 0 |
| 1 | 0 | 0 | 0  | 2 | 0 | 0 |
| 1 | 0 | 0 | 2  | 0 | 1 | 0 |
| 1 | 0 | 0 | 3  | 2 | 1 | 1 |
| 2 | 0 | 0 | 1  | 3 | 2 | 0 |

|         |      |         |         |         |         |        |
|---------|------|---------|---------|---------|---------|--------|
| 1       | 0    | 1       | 0       | 0       | 0       | 0      |
| 2       | 0    | 1       | 2       | 4       | 1       | 0      |
| 2       | 0    | 0       | 4       | 0       | 0       | 0      |
| 2       | 0    | 0       | 0       | 1       | 1       | 0      |
| 3       | 0    | 1       | 1       | 0       | 0       | 0      |
| 0       | 0    | 0       | 2       | 4       | 4       | 0      |
| 1       | 0    | 0       | 4       | 4       | 2       | 0      |
| 0       | 0    | 0       | 0       | 1       | 2       | 0      |
| 0       | 0    | 0       | 2       | 2       | 0       | 0      |
| 0       | 0    | 0       | 0       | 0       | 0       | 0      |
| 1       | 0    | 0       | 1       | 2       | 2       | 0      |
| 0       | 0    | 2       | 2       | 0       | 2       | 0      |
| 0       | 29   | 0       | 0       | 0       | 0       | 1      |
| E_47    | F_2  | F_43    | F_6     | F_7     | F_8     | G_33   |
| UC      | UC   | UC      | UC      | UC      | UC      | UC     |
| 1686048 | 760  | 1073479 | 1756392 | 2109089 | 2167046 | 865707 |
| 16      | 26   | 16      | 16      | 18      | 20      | 27     |
| -1.09   | 1.04 | -1.07   | -1.20   | -0.74   | -0.24   | 1.29   |

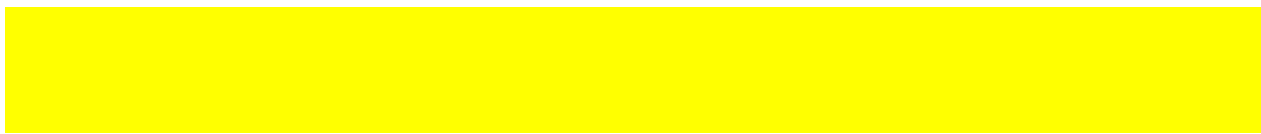

|         |         |         |        |        |         |         |
|---------|---------|---------|--------|--------|---------|---------|
| 0.03    | 0.57    | 0.03    | 0.27   | 0.57   | 0.82    | 0.56    |
| 28      | 15      | 29      | 19     | 14     | 6       | 17      |
| 1       | 1       | 1       | 1      | 1      | 1       | 1       |
| 22      | 23      | 24      | 25     | 26     | 27      | 28      |
| 22      | 23      | 24      | 25     | 26     | 27      | 1       |
| F_6     | F_7     | F_8     | G_33   | G_34   | G_8     | A_1     |
| UC      | UC      | UC      | UC     | UC     | UC      | CHR_NP  |
| 1873959 | 1687678 | 1238990 | 121924 | 416015 | 1782397 | 2570804 |
| F_6     | F_7     | F_8     | G_33   | G_34   | G_8     | A_1     |
| 687405  | 642121  | 571738  | 12006  | 84942  | 490594  | 524718  |
| 121143  | 109242  | 54591   | 45542  | 77391  | 190767  | 57861   |
| 212423  | 151317  | 99440   | 5799   | 40120  | 56160   | 19787   |
| 154534  | 153536  | 103282  | 20023  | 36859  | 144853  | 154427  |
| 195430  | 169720  | 125410  | 9164   | 48028  | 62452   | 40902   |
| 9242    | 14625   | 9248    | 1222   | 6252   | 159965  | 429461  |
| 55361   | 45205   | 18631   | 5116   | 25442  | 105646  | 129967  |
| 1948    | 4365    | 1630    | 204    | 877    | 48162   | 239532  |
| 11730   | 15125   | 9109    | 290    | 6027   | 77934   | 125922  |
| 20299   | 18237   | 9862    | 1294   | 7638   | 64617   | 89917   |
| 17062   | 20395   | 12986   | 343    | 4804   | 24819   | 40910   |
| 34885   | 34820   | 21490   | 1422   | 6898   | 26015   | 27652   |
| 22591   | 21334   | 10088   | 995    | 4774   | 22981   | 47820   |
| 26166   | 30912   | 30356   | 1976   | 5644   | 19273   | 22471   |
| 3952    | 4627    | 1461    | 351    | 754    | 16947   | 76438   |
| 39459   | 27487   | 24425   | 196    | 1146   | 3916    | 7077    |
| 2432    | 2128    | 840     | 387    | 1626   | 17363   | 32560   |
| 11801   | 11726   | 6357    | 363    | 1789   | 7192    | 16561   |
| 5932    | 5481    | 2466    | 284    | 2298   | 19340   | 32924   |

|       |       |       |      |      |       |       |
|-------|-------|-------|------|------|-------|-------|
| 14364 | 12199 | 6199  | 886  | 2965 | 10682 | 11662 |
| 12856 | 11905 | 5736  | 228  | 1450 | 3881  | 5082  |
| 7234  | 7197  | 4049  | 254  | 2096 | 10495 | 10374 |
| 7834  | 6704  | 2699  | 243  | 1725 | 11779 | 12831 |
| 4539  | 3930  | 615   | 962  | 2819 | 3401  | 16942 |
| 1382  | 1354  | 842   | 226  | 1591 | 6662  | 30968 |
| 10683 | 7900  | 4933  | 51   | 1149 | 5975  | 7914  |
| 10769 | 13171 | 13012 | 478  | 2192 | 5029  | 3956  |
| 2890  | 2807  | 1132  | 133  | 420  | 17452 | 20362 |
| 4390  | 5071  | 2609  | 428  | 1155 | 5432  | 14099 |
| 9991  | 7926  | 4721  | 281  | 2163 | 7464  | 4525  |
| 5461  | 4259  | 1824  | 284  | 1365 | 7197  | 4668  |
| 13143 | 10960 | 5985  | 808  | 2076 | 6021  | 7107  |
| 1640  | 1939  | 883   | 106  | 796  | 7148  | 25687 |
| 581   | 1385  | 711   | 69   | 307  | 2763  | 39709 |
| 4171  | 4801  | 2471  | 402  | 1062 | 4958  | 9505  |
| 3709  | 5120  | 4332  | 815  | 1773 | 5418  | 3867  |
| 2742  | 3385  | 1427  | 470  | 882  | 7719  | 10370 |
| 1180  | 1672  | 977   | 290  | 1205 | 4931  | 11825 |
| 3254  | 3569  | 2541  | 1069 | 1744 | 3394  | 3680  |
| 18645 | 5740  | 3502  | 485  | 997  | 1500  | 2655  |
| 8974  | 6310  | 3723  | 756  | 448  | 875   | 1553  |
| 5373  | 4777  | 4227  | 174  | 1375 | 1340  | 1182  |
| 3363  | 2935  | 2596  | 385  | 780  | 2474  | 2973  |
| 243   | 482   | 260   | 57   | 123  | 5969  | 15267 |
| 3004  | 2416  | 1529  | 145  | 1351 | 1744  | 2875  |
| 4100  | 3480  | 2045  | 123  | 672  | 2079  | 2339  |
| 2707  | 2062  | 1123  | 106  | 1033 | 3511  | 4959  |
| 6038  | 3801  | 3568  | 67   | 491  | 1780  | 1469  |
| 106   | 240   | 137   | 12   | 52   | 1090  | 16994 |
| 746   | 1137  | 265   | 6    | 151  | 1755  | 8702  |
| 3158  | 1497  | 832   | 253  | 739  | 2748  | 1046  |
| 1146  | 952   | 446   | 176  | 593  | 1203  | 1882  |
| 1629  | 2190  | 1899  | 152  | 574  | 1525  | 951   |
| 1386  | 1082  | 370   | 36   | 175  | 1301  | 3760  |
| 2003  | 2149  | 1287  | 1    | 212  | 3705  | 2971  |
| 85    | 164   | 125   | 4    | 19   | 870   | 12278 |
| 855   | 997   | 559   | 129  | 488  | 1698  | 2601  |
| 2417  | 1667  | 759   | 58   | 405  | 1378  | 1454  |
| 1339  | 1498  | 1161  | 47   | 690  | 766   | 1205  |
| 3727  | 2354  | 959   | 559  | 775  | 1354  | 724   |
| 1470  | 1318  | 736   | 103  | 529  | 1009  | 1246  |
| 1493  | 1073  | 664   | 17   | 296  | 895   | 966   |
| 37    | 57    | 30    | 16   | 38   | 2086  | 19396 |
| 32    | 67    | 60    | 7    | 23   | 397   | 13240 |
| 1434  | 1742  | 1730  | 86   | 61   | 1002  | 688   |
| 360   | 531   | 286   | 41   | 236  | 1815  | 3256  |
| 280   | 427   | 254   | 13   | 185  | 1317  | 1778  |
| 207   | 330   | 159   | 21   | 107  | 2009  | 4922  |
| 619   | 510   | 345   | 26   | 206  | 370   | 890   |
| 288   | 253   | 116   | 29   | 124  | 2669  | 2210  |
| 1329  | 1153  | 732   | 101  | 246  | 370   | 253   |
| 1378  | 1418  | 1478  | 45   | 93   | 305   | 737   |
| 95    | 173   | 47    | 32   | 38   | 1552  | 6757  |
| 704   | 573   | 316   | 8    | 80   | 836   | 1240  |
| 567   | 509   | 180   | 41   | 334  | 596   | 1151  |
| 2726  | 1012  | 608   | 98   | 229  | 1033  | 629   |
| 1000  | 895   | 584   | 4    | 181  | 1372  | 714   |
| 971   | 574   | 332   | 189  | 257  | 1310  | 364   |

|      |      |     |     |     |      |      |
|------|------|-----|-----|-----|------|------|
| 1677 | 1299 | 918 | 69  | 311 | 451  | 322  |
| 505  | 755  | 528 | 46  | 250 | 283  | 255  |
| 390  | 485  | 234 | 25  | 108 | 631  | 1758 |
| 1436 | 1034 | 977 | 9   | 138 | 280  | 277  |
| 805  | 949  | 668 | 115 | 90  | 500  | 497  |
| 216  | 410  | 282 | 3   | 58  | 184  | 1045 |
| 263  | 236  | 156 | 37  | 226 | 1087 | 1734 |
| 966  | 716  | 481 | 10  | 103 | 377  | 318  |
| 829  | 798  | 807 | 49  | 135 | 291  | 282  |
| 96   | 131  | 37  | 9   | 43  | 849  | 3254 |
| 356  | 267  | 135 | 28  | 66  | 324  | 480  |
| 1704 | 805  | 366 | 137 | 212 | 402  | 518  |
| 970  | 706  | 377 | 20  | 79  | 184  | 201  |
| 2    | 13   | 18  | 2   | 1   | 171  | 4097 |
| 522  | 558  | 250 | 7   | 81  | 155  | 313  |
| 266  | 388  | 117 | 12  | 68  | 786  | 703  |
| 41   | 65   | 40  | 4   | 24  | 333  | 1680 |
| 149  | 205  | 119 | 11  | 32  | 196  | 801  |
| 675  | 598  | 441 | 40  | 71  | 196  | 115  |
| 608  | 577  | 345 | 29  | 68  | 256  | 155  |
| 663  | 658  | 404 | 31  | 208 | 205  | 151  |
| 29   | 59   | 28  | 5   | 21  | 495  | 1066 |
| 246  | 273  | 182 | 9   | 77  | 250  | 225  |
| 362  | 426  | 145 | 17  | 83  | 371  | 266  |
| 542  | 557  | 522 | 18  | 183 | 123  | 200  |
| 301  | 261  | 72  | 48  | 91  | 577  | 1037 |
| 40   | 96   | 82  | 4   | 25  | 560  | 2176 |
| 37   | 85   | 34  | 4   | 18  | 438  | 1580 |
| 392  | 311  | 191 | 39  | 115 | 83   | 110  |
| 173  | 212  | 132 | 69  | 139 | 251  | 184  |
| 65   | 120  | 102 | 8   | 39  | 301  | 1390 |
| 159  | 160  | 87  | 8   | 58  | 408  | 709  |
| 202  | 172  | 61  | 14  | 42  | 165  | 387  |
| 487  | 518  | 270 | 16  | 72  | 118  | 124  |
| 235  | 202  | 71  | 21  | 160 | 181  | 128  |
| 58   | 100  | 56  | 5   | 33  | 484  | 1041 |
| 582  | 305  | 196 | 10  | 126 | 69   | 212  |
| 658  | 368  | 230 | 33  | 71  | 169  | 308  |
| 200  | 219  | 67  | 7   | 41  | 215  | 908  |
| 156  | 288  | 108 | 16  | 31  | 209  | 577  |
| 156  | 288  | 108 | 16  | 31  | 209  | 577  |
| 126  | 154  | 69  | 28  | 97  | 171  | 197  |
| 185  | 207  | 190 | 1   | 52  | 102  | 133  |
| 226  | 155  | 150 | 0   | 28  | 48   | 101  |
| 311  | 131  | 51  | 2   | 44  | 664  | 466  |
| 238  | 166  | 62  | 4   | 16  | 144  | 278  |
| 6    | 18   | 10  | 0   | 15  | 111  | 976  |
| 299  | 338  | 149 | 20  | 22  | 98   | 114  |
| 143  | 146  | 129 | 20  | 106 | 99   | 122  |
| 289  | 282  | 195 | 0   | 29  | 126  | 108  |
| 243  | 226  | 167 | 56  | 21  | 71   | 99   |
| 346  | 357  | 149 | 84  | 42  | 123  | 70   |
| 74   | 51   | 31  | 1   | 7   | 334  | 83   |
| 261  | 119  | 33  | 7   | 32  | 148  | 81   |
| 131  | 150  | 58  | 9   | 40  | 245  | 382  |
| 165  | 141  | 92  | 7   | 26  | 32   | 78   |
| 49   | 48   | 42  | 1   | 14  | 154  | 604  |
| 153  | 130  | 81  | 1   | 53  | 105  | 93   |
| 128  | 119  | 79  | 0   | 18  | 133  | 114  |

|     |     |     |    |    |     |     |
|-----|-----|-----|----|----|-----|-----|
| 123 | 172 | 110 | 3  | 21 | 122 | 247 |
| 131 | 135 | 77  | 3  | 18 | 126 | 289 |
| 172 | 102 | 101 | 10 | 33 | 76  | 52  |
| 165 | 134 | 106 | 2  | 25 | 126 | 166 |
| 96  | 94  | 70  | 7  | 10 | 61  | 51  |
| 340 | 174 | 136 | 12 | 24 | 80  | 39  |
| 128 | 106 | 68  | 15 | 47 | 90  | 193 |
| 1   | 15  | 6   | 3  | 13 | 68  | 632 |
| 92  | 117 | 112 | 5  | 10 | 93  | 55  |
| 202 | 85  | 89  | 4  | 19 | 31  | 44  |
| 90  | 44  | 21  | 10 | 17 | 74  | 131 |
| 58  | 61  | 48  | 13 | 17 | 102 | 76  |
| 84  | 89  | 75  | 9  | 31 | 71  | 68  |
| 60  | 44  | 21  | 6  | 14 | 34  | 105 |
| 21  | 41  | 26  | 3  | 14 | 155 | 207 |
| 135 | 67  | 22  | 0  | 8  | 220 | 314 |
| 166 | 104 | 53  | 6  | 21 | 43  | 59  |
| 286 | 241 | 137 | 0  | 9  | 8   | 27  |
| 55  | 80  | 100 | 13 | 21 | 59  | 57  |
| 101 | 122 | 88  | 51 | 46 | 119 | 72  |
| 133 | 67  | 80  | 5  | 28 | 20  | 29  |
| 72  | 83  | 86  | 1  | 28 | 28  | 43  |
| 110 | 149 | 140 | 2  | 4  | 76  | 166 |
| 5   | 9   | 5   | 0  | 2  | 37  | 646 |
| 90  | 79  | 30  | 2  | 34 | 31  | 22  |
| 139 | 64  | 101 | 20 | 12 | 79  | 11  |
| 38  | 34  | 10  | 1  | 17 | 71  | 217 |
| 42  | 33  | 13  | 3  | 31 | 51  | 79  |
| 96  | 80  | 78  | 3  | 14 | 54  | 63  |
| 66  | 60  | 69  | 6  | 31 | 35  | 30  |
| 78  | 96  | 102 | 3  | 6  | 13  | 26  |
| 14  | 15  | 9   | 1  | 8  | 67  | 337 |
| 57  | 67  | 43  | 1  | 4  | 65  | 109 |
| 72  | 83  | 38  | 6  | 14 | 16  | 20  |
| 62  | 43  | 26  | 2  | 10 | 92  | 173 |
| 103 | 95  | 69  | 2  | 24 | 60  | 44  |
| 49  | 35  | 26  | 1  | 16 | 48  | 31  |
| 32  | 26  | 5   | 2  | 8  | 71  | 268 |
| 139 | 79  | 96  | 25 | 15 | 45  | 25  |
| 56  | 51  | 50  | 9  | 11 | 48  | 35  |
| 43  | 54  | 34  | 7  | 14 | 60  | 99  |
| 57  | 42  | 28  | 1  | 10 | 16  | 35  |
| 140 | 75  | 53  | 4  | 31 | 47  | 24  |
| 56  | 93  | 40  | 0  | 17 | 102 | 62  |
| 13  | 17  | 6   | 2  | 6  | 103 | 217 |
| 90  | 75  | 61  | 5  | 17 | 52  | 24  |
| 15  | 22  | 10  | 3  | 6  | 88  | 141 |
| 84  | 85  | 120 | 3  | 10 | 32  | 27  |
| 93  | 103 | 70  | 9  | 16 | 30  | 37  |
| 12  | 17  | 6   | 2  | 6  | 95  | 201 |
| 140 | 50  | 18  | 4  | 10 | 36  | 36  |
| 88  | 103 | 47  | 1  | 30 | 43  | 35  |
| 44  | 50  | 20  | 3  | 16 | 73  | 42  |
| 5   | 0   | 14  | 0  | 85 | 59  | 17  |
| 0   | 6   | 3   | 1  | 3  | 103 | 90  |
| 54  | 51  | 21  | 1  | 13 | 36  | 72  |
| 148 | 74  | 40  | 15 | 8  | 29  | 16  |
| 41  | 33  | 19  | 0  | 6  | 103 | 46  |
| 96  | 35  | 36  | 7  | 34 | 41  | 70  |

|     |    |    |    |    |     |     |
|-----|----|----|----|----|-----|-----|
| 30  | 20 | 3  | 0  | 1  | 28  | 199 |
| 60  | 82 | 53 | 2  | 6  | 73  | 60  |
| 38  | 60 | 29 | 1  | 7  | 28  | 24  |
| 35  | 56 | 57 | 1  | 6  | 63  | 140 |
| 156 | 87 | 39 | 10 | 16 | 49  | 33  |
| 19  | 52 | 13 | 1  | 9  | 35  | 24  |
| 92  | 85 | 37 | 9  | 17 | 43  | 25  |
| 61  | 43 | 30 | 3  | 7  | 41  | 16  |
| 4   | 13 | 15 | 0  | 6  | 80  | 194 |
| 138 | 43 | 41 | 0  | 6  | 67  | 36  |
| 57  | 59 | 30 | 1  | 10 | 41  | 36  |
| 65  | 47 | 20 | 4  | 17 | 47  | 17  |
| 173 | 65 | 49 | 2  | 32 | 54  | 141 |
| 53  | 48 | 48 | 5  | 12 | 44  | 48  |
| 98  | 70 | 43 | 7  | 11 | 10  | 30  |
| 52  | 22 | 12 | 3  | 9  | 23  | 16  |
| 28  | 13 | 9  | 3  | 2  | 131 | 221 |
| 46  | 45 | 33 | 4  | 11 | 41  | 12  |
| 32  | 44 | 29 | 1  | 2  | 70  | 31  |
| 49  | 34 | 15 | 3  | 7  | 40  | 48  |
| 42  | 34 | 20 | 1  | 12 | 49  | 53  |
| 58  | 25 | 15 | 0  | 5  | 39  | 44  |
| 0   | 2  | 1  | 0  | 0  | 14  | 288 |
| 34  | 28 | 9  | 3  | 11 | 52  | 53  |
| 6   | 5  | 8  | 4  | 6  | 56  | 84  |
| 15  | 36 | 30 | 2  | 9  | 36  | 26  |
| 12  | 24 | 20 | 3  | 8  | 14  | 54  |
| 24  | 37 | 16 | 6  | 11 | 12  | 20  |
| 58  | 17 | 10 | 0  | 7  | 104 | 50  |
| 45  | 42 | 54 | 5  | 14 | 8   | 8   |
| 60  | 64 | 55 | 3  | 11 | 18  | 19  |
| 39  | 47 | 45 | 0  | 5  | 16  | 27  |
| 50  | 36 | 15 | 9  | 5  | 14  | 22  |
| 14  | 26 | 18 | 0  | 6  | 8   | 40  |
| 9   | 8  | 6  | 0  | 8  | 26  | 171 |
| 35  | 52 | 30 | 4  | 4  | 24  | 14  |
| 2   | 0  | 0  | 1  | 0  | 22  | 223 |
| 38  | 44 | 28 | 1  | 4  | 16  | 21  |
| 17  | 23 | 9  | 0  | 1  | 31  | 72  |
| 21  | 31 | 20 | 0  | 5  | 29  | 22  |
| 33  | 31 | 15 | 0  | 5  | 12  | 16  |
| 10  | 6  | 1  | 1  | 8  | 17  | 41  |
| 19  | 11 | 6  | 0  | 5  | 38  | 86  |
| 26  | 24 | 27 | 1  | 5  | 19  | 16  |
| 24  | 19 | 9  | 1  | 2  | 29  | 17  |
| 13  | 14 | 2  | 0  | 4  | 10  | 19  |
| 1   | 3  | 2  | 1  | 4  | 21  | 92  |
| 25  | 23 | 9  | 3  | 4  | 22  | 31  |
| 25  | 23 | 9  | 3  | 4  | 22  | 31  |
| 65  | 17 | 23 | 4  | 4  | 12  | 10  |
| 38  | 41 | 32 | 1  | 1  | 8   | 11  |
| 9   | 19 | 13 | 3  | 8  | 30  | 27  |
| 59  | 22 | 9  | 0  | 9  | 30  | 21  |
| 19  | 11 | 7  | 0  | 7  | 12  | 15  |
| 35  | 24 | 10 | 1  | 6  | 15  | 17  |
| 6   | 9  | 7  | 0  | 3  | 4   | 17  |
| 14  | 14 | 6  | 0  | 4  | 22  | 33  |
| 21  | 35 | 51 | 0  | 8  | 9   | 15  |
| 12  | 7  | 2  | 0  | 4  | 12  | 29  |



|    |    |    |   |    |    |     |
|----|----|----|---|----|----|-----|
| 15 | 10 | 8  | 1 | 31 | 4  | 7   |
| 57 | 44 | 33 | 0 | 4  | 11 | 22  |
| 12 | 21 | 14 | 0 | 4  | 6  | 24  |
| 1  | 0  | 0  | 1 | 0  | 9  | 149 |
| 12 | 13 | 7  | 0 | 7  | 12 | 13  |
| 9  | 8  | 3  | 2 | 3  | 29 | 47  |
| 71 | 46 | 25 | 0 | 8  | 7  | 9   |
| 15 | 13 | 20 | 2 | 1  | 19 | 13  |
| 8  | 8  | 3  | 2 | 3  | 22 | 42  |
| 39 | 28 | 7  | 2 | 6  | 11 | 12  |
| 39 | 41 | 35 | 8 | 2  | 22 | 9   |
| 16 | 7  | 9  | 0 | 2  | 34 | 31  |
| 19 | 20 | 24 | 1 | 6  | 15 | 6   |
| 0  | 0  | 0  | 0 | 0  | 4  | 113 |
| 41 | 33 | 43 | 0 | 6  | 8  | 14  |
| 14 | 14 | 22 | 5 | 2  | 6  | 9   |
| 17 | 13 | 16 | 0 | 1  | 3  | 27  |
| 34 | 17 | 13 | 0 | 2  | 10 | 11  |
| 17 | 19 | 7  | 1 | 4  | 30 | 13  |
| 1  | 2  | 0  | 1 | 0  | 9  | 39  |
| 18 | 13 | 7  | 1 | 15 | 14 | 17  |
| 8  | 4  | 0  | 0 | 1  | 9  | 14  |
| 0  | 0  | 0  | 0 | 0  | 0  | 3   |
| 38 | 31 | 22 | 4 | 3  | 15 | 13  |
| 14 | 4  | 3  | 3 | 0  | 8  | 13  |
| 12 | 15 | 23 | 5 | 6  | 12 | 11  |
| 32 | 17 | 9  | 1 | 10 | 16 | 9   |
| 26 | 16 | 7  | 0 | 4  | 10 | 3   |
| 48 | 15 | 7  | 0 | 4  | 24 | 18  |
| 32 | 21 | 7  | 0 | 1  | 15 | 8   |
| 30 | 24 | 23 | 4 | 2  | 4  | 8   |
| 17 | 13 | 9  | 1 | 7  | 10 | 11  |
| 8  | 3  | 0  | 0 | 0  | 8  | 11  |
| 36 | 7  | 4  | 0 | 6  | 10 | 9   |
| 2  | 1  | 0  | 0 | 0  | 78 | 58  |
| 0  | 6  | 0  | 0 | 0  | 10 | 72  |
| 12 | 4  | 1  | 0 | 3  | 28 | 20  |
| 33 | 25 | 25 | 2 | 5  | 10 | 5   |
| 7  | 18 | 5  | 0 | 3  | 19 | 31  |
| 41 | 49 | 36 | 0 | 7  | 1  | 3   |
| 39 | 11 | 12 | 2 | 5  | 5  | 12  |
| 8  | 6  | 3  | 1 | 2  | 3  | 39  |
| 19 | 14 | 14 | 2 | 4  | 19 | 20  |
| 10 | 7  | 4  | 0 | 7  | 10 | 12  |
| 16 | 9  | 5  | 0 | 1  | 4  | 11  |
| 10 | 3  | 0  | 0 | 1  | 36 | 15  |
| 43 | 20 | 7  | 0 | 2  | 8  | 5   |
| 16 | 23 | 12 | 0 | 4  | 2  | 15  |
| 16 | 29 | 15 | 0 | 3  | 3  | 0   |
| 6  | 7  | 15 | 0 | 4  | 13 | 4   |
| 8  | 7  | 1  | 0 | 1  | 7  | 13  |
| 42 | 16 | 14 | 2 | 4  | 2  | 3   |
| 31 | 10 | 36 | 0 | 1  | 2  | 2   |
| 26 | 23 | 29 | 0 | 2  | 3  | 7   |
| 20 | 4  | 6  | 1 | 6  | 5  | 5   |
| 3  | 4  | 4  | 0 | 8  | 7  | 10  |
| 21 | 11 | 4  | 2 | 4  | 8  | 3   |
| 1  | 3  | 1  | 0 | 1  | 14 | 52  |
| 0  | 1  | 0  | 0 | 0  | 20 | 56  |

|    |    |    |   |   |    |    |
|----|----|----|---|---|----|----|
| 12 | 11 | 7  | 0 | 1 | 19 | 7  |
| 3  | 3  | 1  | 0 | 3 | 19 | 26 |
| 10 | 7  | 5  | 0 | 1 | 5  | 4  |
| 31 | 5  | 7  | 0 | 4 | 7  | 1  |
| 12 | 8  | 10 | 0 | 1 | 2  | 5  |
| 12 | 8  | 5  | 0 | 0 | 2  | 0  |
| 14 | 20 | 14 | 0 | 1 | 3  | 11 |
| 5  | 4  | 1  | 0 | 2 | 5  | 71 |
| 11 | 18 | 8  | 0 | 3 | 3  | 3  |
| 27 | 16 | 10 | 0 | 2 | 13 | 5  |
| 13 | 15 | 5  | 1 | 1 | 4  | 6  |
| 15 | 6  | 3  | 0 | 2 | 13 | 13 |
| 15 | 10 | 1  | 2 | 0 | 1  | 0  |
| 12 | 14 | 15 | 0 | 1 | 5  | 8  |
| 6  | 13 | 7  | 1 | 1 | 2  | 14 |
| 5  | 4  | 11 | 0 | 2 | 4  | 4  |
| 16 | 9  | 3  | 3 | 2 | 7  | 6  |
| 23 | 12 | 16 | 1 | 0 | 13 | 4  |
| 4  | 1  | 1  | 0 | 1 | 5  | 33 |
| 21 | 17 | 9  | 0 | 1 | 3  | 2  |
| 2  | 2  | 2  | 1 | 0 | 14 | 28 |
| 11 | 5  | 3  | 0 | 1 | 8  | 5  |
| 12 | 12 | 7  | 0 | 1 | 1  | 0  |
| 14 | 13 | 5  | 0 | 0 | 2  | 4  |
| 1  | 0  | 1  | 0 | 0 | 22 | 4  |
| 5  | 9  | 7  | 0 | 2 | 9  | 1  |
| 13 | 11 | 4  | 0 | 2 | 5  | 11 |
| 16 | 12 | 8  | 0 | 1 | 2  | 2  |
| 23 | 14 | 4  | 0 | 0 | 2  | 1  |
| 7  | 4  | 6  | 3 | 1 | 1  | 6  |
| 15 | 11 | 10 | 0 | 2 | 5  | 0  |
| 26 | 20 | 5  | 0 | 4 | 5  | 3  |
| 5  | 11 | 17 | 0 | 2 | 7  | 2  |
| 1  | 2  | 0  | 0 | 1 | 23 | 61 |
| 6  | 4  | 3  | 0 | 0 | 9  | 8  |
| 4  | 10 | 4  | 0 | 0 | 3  | 3  |
| 11 | 7  | 4  | 0 | 2 | 3  | 5  |
| 10 | 7  | 2  | 0 | 2 | 5  | 5  |
| 4  | 14 | 1  | 2 | 1 | 0  | 9  |
| 0  | 1  | 0  | 1 | 1 | 10 | 23 |
| 6  | 3  | 2  | 0 | 1 | 0  | 7  |
| 1  | 1  | 5  | 1 | 2 | 9  | 11 |
| 2  | 4  | 0  | 0 | 3 | 5  | 13 |
| 5  | 6  | 2  | 0 | 0 | 5  | 5  |
| 0  | 0  | 1  | 0 | 2 | 8  | 26 |
| 5  | 3  | 3  | 0 | 1 | 8  | 7  |
| 5  | 1  | 1  | 0 | 1 | 1  | 8  |
| 5  | 9  | 2  | 0 | 1 | 2  | 8  |
| 6  | 5  | 3  | 0 | 4 | 3  | 5  |
| 6  | 3  | 4  | 0 | 1 | 2  | 1  |
| 4  | 7  | 2  | 1 | 0 | 8  | 10 |
| 10 | 10 | 10 | 0 | 5 | 1  | 2  |
| 1  | 4  | 0  | 0 | 0 | 4  | 23 |
| 0  | 0  | 1  | 0 | 1 | 4  | 12 |
| 13 | 7  | 1  | 0 | 3 | 2  | 0  |
| 2  | 4  | 2  | 0 | 0 | 0  | 2  |
| 3  | 3  | 3  | 0 | 0 | 4  | 2  |
| 8  | 2  | 3  | 0 | 2 | 3  | 4  |
| 3  | 4  | 6  | 0 | 1 | 1  | 8  |

|    |    |    |   |   |    |    |
|----|----|----|---|---|----|----|
| 17 | 7  | 4  | 1 | 0 | 1  | 2  |
| 0  | 1  | 2  | 0 | 0 | 6  | 14 |
| 15 | 5  | 2  | 1 | 1 | 6  | 3  |
| 2  | 7  | 2  | 0 | 0 | 4  | 1  |
| 5  | 8  | 4  | 0 | 0 | 1  | 5  |
| 6  | 4  | 3  | 1 | 2 | 1  | 3  |
| 11 | 5  | 11 | 1 | 1 | 1  | 4  |
| 8  | 3  | 3  | 0 | 2 | 1  | 2  |
| 6  | 2  | 1  | 0 | 1 | 1  | 3  |
| 14 | 4  | 1  | 0 | 2 | 4  | 6  |
| 8  | 4  | 1  | 1 | 0 | 2  | 8  |
| 5  | 8  | 2  | 0 | 4 | 3  | 1  |
| 2  | 5  | 0  | 0 | 5 | 7  | 4  |
| 3  | 4  | 1  | 0 | 1 | 1  | 2  |
| 5  | 5  | 9  | 0 | 0 | 3  | 1  |
| 0  | 3  | 1  | 0 | 0 | 6  | 5  |
| 0  | 0  | 2  | 0 | 0 | 0  | 0  |
| 9  | 1  | 5  | 1 | 2 | 2  | 5  |
| 7  | 3  | 2  | 1 | 1 | 5  | 8  |
| 1  | 1  | 1  | 0 | 0 | 6  | 9  |
| 5  | 3  | 2  | 0 | 1 | 1  | 2  |
| 4  | 1  | 2  | 1 | 1 | 2  | 5  |
| 2  | 3  | 2  | 1 | 0 | 13 | 10 |
| 6  | 0  | 1  | 0 | 0 | 0  | 2  |
| 6  | 6  | 5  | 0 | 1 | 4  | 4  |
| 20 | 5  | 0  | 0 | 2 | 0  | 2  |
| 2  | 1  | 0  | 0 | 0 | 4  | 5  |
| 4  | 6  | 2  | 0 | 0 | 0  | 2  |
| 1  | 0  | 0  | 0 | 0 | 0  | 6  |
| 0  | 1  | 0  | 1 | 1 | 0  | 12 |
| 3  | 6  | 2  | 0 | 3 | 4  | 4  |
| 15 | 4  | 7  | 0 | 0 | 2  | 2  |
| 6  | 8  | 3  | 0 | 0 | 0  | 0  |
| 2  | 0  | 0  | 0 | 1 | 3  | 13 |
| 6  | 10 | 2  | 0 | 1 | 2  | 0  |
| 9  | 5  | 2  | 0 | 1 | 3  | 3  |
| 0  | 0  | 0  | 0 | 0 | 0  | 24 |
| 0  | 0  | 0  | 0 | 0 | 1  | 18 |
| 0  | 0  | 0  | 0 | 0 | 1  | 17 |
| 2  | 4  | 1  | 0 | 0 | 8  | 2  |
| 6  | 3  | 5  | 0 | 0 | 4  | 2  |
| 11 | 3  | 1  | 0 | 1 | 1  | 0  |
| 1  | 1  | 6  | 0 | 0 | 1  | 3  |
| 1  | 5  | 4  | 2 | 1 | 4  | 2  |
| 0  | 1  | 0  | 0 | 0 | 2  | 40 |
| 0  | 0  | 0  | 0 | 0 | 3  | 6  |
| 3  | 2  | 1  | 0 | 0 | 2  | 4  |
| 0  | 1  | 0  | 0 | 0 | 1  | 18 |
| 12 | 2  | 2  | 1 | 1 | 5  | 3  |
| 9  | 7  | 3  | 0 | 0 | 0  | 0  |
| 5  | 3  | 9  | 0 | 0 | 3  | 1  |
| 0  | 1  | 0  | 0 | 0 | 2  | 10 |
| 5  | 5  | 6  | 0 | 0 | 0  | 10 |
| 0  | 0  | 0  | 0 | 0 | 1  | 2  |
| 4  | 3  | 1  | 0 | 0 | 0  | 1  |
| 2  | 1  | 0  | 0 | 0 | 1  | 4  |
| 0  | 0  | 2  | 0 | 0 | 1  | 18 |
| 5  | 8  | 0  | 0 | 0 | 6  | 4  |
| 5  | 6  | 3  | 0 | 1 | 2  | 1  |

|    |   |   |   |   |    |    |
|----|---|---|---|---|----|----|
| 14 | 5 | 3 | 0 | 0 | 1  | 2  |
| 2  | 0 | 1 | 0 | 2 | 0  | 8  |
| 2  | 4 | 5 | 0 | 1 | 1  | 0  |
| 4  | 2 | 2 | 0 | 0 | 0  | 4  |
| 7  | 5 | 4 | 0 | 0 | 4  | 3  |
| 5  | 7 | 0 | 0 | 1 | 3  | 8  |
| 7  | 1 | 1 | 0 | 0 | 4  | 4  |
| 0  | 1 | 0 | 0 | 0 | 8  | 41 |
| 2  | 4 | 1 | 1 | 3 | 1  | 3  |
| 6  | 2 | 3 | 0 | 2 | 2  | 0  |
| 2  | 4 | 3 | 0 | 0 | 3  | 3  |
| 1  | 2 | 1 | 0 | 0 | 1  | 0  |
| 1  | 0 | 1 | 0 | 0 | 5  | 8  |
| 0  | 1 | 0 | 0 | 0 | 9  | 11 |
| 2  | 0 | 0 | 0 | 1 | 2  | 0  |
| 2  | 2 | 3 | 0 | 0 | 2  | 0  |
| 2  | 2 | 2 | 1 | 0 | 1  | 2  |
| 2  | 3 | 1 | 1 | 1 | 4  | 4  |
| 0  | 0 | 0 | 0 | 0 | 3  | 7  |
| 1  | 7 | 2 | 0 | 1 | 5  | 2  |
| 1  | 2 | 0 | 0 | 0 | 1  | 6  |
| 3  | 4 | 1 | 0 | 0 | 2  | 2  |
| 2  | 1 | 3 | 1 | 0 | 1  | 2  |
| 2  | 3 | 3 | 0 | 2 | 4  | 2  |
| 3  | 0 | 3 | 0 | 1 | 4  | 0  |
| 4  | 5 | 6 | 0 | 1 | 5  | 0  |
| 1  | 5 | 3 | 0 | 0 | 0  | 1  |
| 5  | 4 | 6 | 0 | 1 | 1  | 1  |
| 3  | 3 | 2 | 0 | 0 | 1  | 2  |
| 2  | 1 | 1 | 1 | 0 | 0  | 1  |
| 1  | 5 | 1 | 0 | 0 | 7  | 2  |
| 0  | 0 | 0 | 0 | 0 | 2  | 6  |
| 3  | 1 | 6 | 0 | 0 | 0  | 2  |
| 0  | 1 | 0 | 0 | 0 | 2  | 17 |
| 7  | 4 | 1 | 0 | 1 | 0  | 1  |
| 1  | 0 | 1 | 0 | 0 | 1  | 8  |
| 0  | 1 | 1 | 0 | 0 | 0  | 6  |
| 4  | 0 | 0 | 0 | 0 | 8  | 2  |
| 0  | 1 | 1 | 0 | 0 | 3  | 3  |
| 1  | 2 | 6 | 0 | 0 | 0  | 3  |
| 1  | 1 | 0 | 0 | 0 | 4  | 7  |
| 0  | 0 | 1 | 0 | 0 | 1  | 3  |
| 1  | 3 | 2 | 2 | 1 | 0  | 0  |
| 1  | 0 | 0 | 0 | 0 | 10 | 2  |
| 0  | 1 | 0 | 0 | 0 | 2  | 12 |
| 1  | 3 | 1 | 0 | 1 | 0  | 0  |
| 0  | 1 | 1 | 0 | 0 | 0  | 1  |
| 0  | 0 | 0 | 0 | 0 | 2  | 13 |
| 0  | 1 | 0 | 0 | 0 | 3  | 14 |
| 2  | 1 | 3 | 0 | 1 | 0  | 0  |
| 4  | 7 | 4 | 0 | 1 | 0  | 0  |
| 2  | 1 | 1 | 0 | 0 | 2  | 2  |
| 11 | 3 | 3 | 0 | 1 | 0  | 0  |
| 5  | 2 | 4 | 0 | 0 | 1  | 1  |
| 0  | 0 | 0 | 0 | 0 | 3  | 12 |
| 0  | 1 | 0 | 0 | 1 | 0  | 10 |
| 0  | 0 | 0 | 0 | 0 | 3  | 6  |
| 4  | 4 | 0 | 0 | 0 | 1  | 1  |
| 3  | 0 | 2 | 0 | 0 | 3  | 3  |

|   |   |   |   |   |   |    |
|---|---|---|---|---|---|----|
| 5 | 1 | 0 | 1 | 1 | 0 | 0  |
| 0 | 1 | 4 | 0 | 0 | 2 | 0  |
| 0 | 3 | 3 | 0 | 0 | 2 | 3  |
| 2 | 5 | 1 | 0 | 0 | 1 | 2  |
| 1 | 2 | 0 | 0 | 0 | 1 | 4  |
| 1 | 1 | 2 | 0 | 0 | 3 | 0  |
| 4 | 2 | 5 | 0 | 1 | 1 | 1  |
| 1 | 0 | 0 | 0 | 0 | 3 | 5  |
| 4 | 0 | 4 | 0 | 0 | 3 | 0  |
| 5 | 4 | 3 | 0 | 0 | 0 | 1  |
| 4 | 3 | 3 | 0 | 1 | 3 | 0  |
| 6 | 4 | 1 | 0 | 1 | 0 | 0  |
| 2 | 2 | 2 | 0 | 0 | 1 | 2  |
| 9 | 3 | 1 | 0 | 1 | 2 | 1  |
| 0 | 1 | 1 | 0 | 0 | 3 | 1  |
| 3 | 4 | 4 | 0 | 1 | 2 | 1  |
| 0 | 1 | 2 | 0 | 0 | 2 | 0  |
| 7 | 0 | 1 | 0 | 0 | 0 | 1  |
| 0 | 1 | 0 | 0 | 0 | 1 | 11 |
| 0 | 1 | 0 | 0 | 0 | 0 | 2  |
| 0 | 2 | 2 | 0 | 0 | 0 | 9  |
| 0 | 1 | 0 | 0 | 0 | 2 | 1  |
| 0 | 2 | 0 | 0 | 1 | 0 | 2  |
| 2 | 0 | 1 | 0 | 0 | 1 | 1  |
| 3 | 2 | 1 | 1 | 0 | 0 | 0  |
| 1 | 3 | 2 | 0 | 0 | 0 | 5  |
| 0 | 0 | 0 | 0 | 0 | 0 | 2  |
| 2 | 4 | 1 | 0 | 0 | 0 | 2  |
| 4 | 0 | 0 | 0 | 0 | 0 | 1  |
| 0 | 1 | 1 | 0 | 0 | 4 | 4  |
| 1 | 0 | 0 | 0 | 0 | 0 | 1  |
| 2 | 4 | 4 | 0 | 0 | 0 | 3  |
| 4 | 4 | 2 | 0 | 1 | 2 | 1  |
| 0 | 1 | 2 | 0 | 1 | 0 | 0  |
| 2 | 2 | 0 | 0 | 0 | 1 | 0  |
| 0 | 0 | 0 | 0 | 0 | 1 | 0  |
| 1 | 2 | 2 | 0 | 1 | 2 | 0  |
| 2 | 0 | 2 | 0 | 0 | 3 | 4  |

|         |         |         |        |        |         |         |
|---------|---------|---------|--------|--------|---------|---------|
| 0.03    | 0.57    | 0.03    | 0.27   | 0.57   | 0.82    | 0.56    |
| 28      | 15      | 29      | 19     | 14     | 6       | 17      |
| 1       | 1       | 1       | 1      | 1      | 1       | 1       |
| 22      | 23      | 24      | 25     | 26     | 27      | 28      |
| 22      | 23      | 24      | 25     | 26     | 27      | 1       |
| F_6     | F_7     | F_8     | G_33   | G_34   | G_8     | A_1     |
| UC      | UC      | UC      | UC     | UC     | UC      | CHR_NP  |
| 1873959 | 1687678 | 1238990 | 121924 | 416015 | 1782397 | 2570804 |
| UC      | UC      | UC      | UC     | UC     | UC      | CHR_NP  |
| 687405  | 642121  | 571738  | 12006  | 84942  | 490594  | 524718  |
| 121143  | 109242  | 54591   | 45542  | 77391  | 190767  | 57861   |
| 212423  | 151317  | 99440   | 5799   | 40120  | 56160   | 19787   |
| 154534  | 153536  | 103282  | 20023  | 36859  | 144853  | 154427  |
| 195430  | 169720  | 125410  | 9164   | 48028  | 62452   | 40902   |

|       |       |       |      |       |        |        |
|-------|-------|-------|------|-------|--------|--------|
| 9242  | 14625 | 9248  | 1222 | 6252  | 159965 | 429461 |
| 55361 | 45205 | 18631 | 5116 | 25442 | 105646 | 129967 |
| 1948  | 4365  | 1630  | 204  | 877   | 48162  | 239532 |
| 11730 | 15125 | 9109  | 290  | 6027  | 77934  | 125922 |
| 20299 | 18237 | 9862  | 1294 | 7638  | 64617  | 89917  |
| 17062 | 20395 | 12986 | 343  | 4804  | 24819  | 40910  |
| 34885 | 34820 | 21490 | 1422 | 6898  | 26015  | 27652  |
| 22591 | 21334 | 10088 | 995  | 4774  | 22981  | 47820  |
| 26166 | 30912 | 30356 | 1976 | 5644  | 19273  | 22471  |
| 3952  | 4627  | 1461  | 351  | 754   | 16947  | 76438  |
| 39459 | 27487 | 24425 | 196  | 1146  | 3916   | 7077   |
| 2432  | 2128  | 840   | 387  | 1626  | 17363  | 32560  |
| 11801 | 11726 | 6357  | 363  | 1789  | 7192   | 16561  |
| 5932  | 5481  | 2466  | 284  | 2298  | 19340  | 32924  |
| 14364 | 12199 | 6199  | 886  | 2965  | 10682  | 11662  |
| 12856 | 11905 | 5736  | 228  | 1450  | 3881   | 5082   |
| 7234  | 7197  | 4049  | 254  | 2096  | 10495  | 10374  |
| 7834  | 6704  | 2699  | 243  | 1725  | 11779  | 12831  |
| 4539  | 3930  | 615   | 962  | 2819  | 3401   | 16942  |
| 1382  | 1354  | 842   | 226  | 1591  | 6662   | 30968  |
| 10683 | 7900  | 4933  | 51   | 1149  | 5975   | 7914   |
| 10769 | 13171 | 13012 | 478  | 2192  | 5029   | 3956   |
| 2890  | 2807  | 1132  | 133  | 420   | 17452  | 20362  |
| 4390  | 5071  | 2609  | 428  | 1155  | 5432   | 14099  |
| 9991  | 7926  | 4721  | 281  | 2163  | 7464   | 4525   |
| 5461  | 4259  | 1824  | 284  | 1365  | 7197   | 4668   |
| 13143 | 10960 | 5985  | 808  | 2076  | 6021   | 7107   |
| 1640  | 1939  | 883   | 106  | 796   | 7148   | 25687  |
| 581   | 1385  | 711   | 69   | 307   | 2763   | 39709  |
| 4171  | 4801  | 2471  | 402  | 1062  | 4958   | 9505   |
| 3709  | 5120  | 4332  | 815  | 1773  | 5418   | 3867   |
| 2742  | 3385  | 1427  | 470  | 882   | 7719   | 10370  |
| 1180  | 1672  | 977   | 290  | 1205  | 4931   | 11825  |
| 3254  | 3569  | 2541  | 1069 | 1744  | 3394   | 3680   |
| 18645 | 5740  | 3502  | 485  | 997   | 1500   | 2655   |
| 8974  | 6310  | 3723  | 756  | 448   | 875    | 1553   |
| 5373  | 4777  | 4227  | 174  | 1375  | 1340   | 1182   |
| 3363  | 2935  | 2596  | 385  | 780   | 2474   | 2973   |
| 243   | 482   | 260   | 57   | 123   | 5969   | 15267  |
| 3004  | 2416  | 1529  | 145  | 1351  | 1744   | 2875   |
| 4100  | 3480  | 2045  | 123  | 672   | 2079   | 2339   |
| 2707  | 2062  | 1123  | 106  | 1033  | 3511   | 4959   |
| 6038  | 3801  | 3568  | 67   | 491   | 1780   | 1469   |
| 106   | 240   | 137   | 12   | 52    | 1090   | 16994  |
| 746   | 1137  | 265   | 6    | 151   | 1755   | 8702   |
| 3158  | 1497  | 832   | 253  | 739   | 2748   | 1046   |
| 1146  | 952   | 446   | 176  | 593   | 1203   | 1882   |
| 1629  | 2190  | 1899  | 152  | 574   | 1525   | 951    |
| 1386  | 1082  | 370   | 36   | 175   | 1301   | 3760   |
| 2003  | 2149  | 1287  | 1    | 212   | 3705   | 2971   |
| 85    | 164   | 125   | 4    | 19    | 870    | 12278  |
| 855   | 997   | 559   | 129  | 488   | 1698   | 2601   |
| 2417  | 1667  | 759   | 58   | 405   | 1378   | 1454   |
| 1339  | 1498  | 1161  | 47   | 690   | 766    | 1205   |
| 3727  | 2354  | 959   | 559  | 775   | 1354   | 724    |
| 1470  | 1318  | 736   | 103  | 529   | 1009   | 1246   |
| 1493  | 1073  | 664   | 17   | 296   | 895    | 966    |
| 37    | 57    | 30    | 16   | 38    | 2086   | 19396  |
| 32    | 67    | 60    | 7    | 23    | 397    | 13240  |

|      |      |      |     |     |      |      |
|------|------|------|-----|-----|------|------|
| 1434 | 1742 | 1730 | 86  | 61  | 1002 | 688  |
| 360  | 531  | 286  | 41  | 236 | 1815 | 3256 |
| 280  | 427  | 254  | 13  | 185 | 1317 | 1778 |
| 207  | 330  | 159  | 21  | 107 | 2009 | 4922 |
| 619  | 510  | 345  | 26  | 206 | 370  | 890  |
| 288  | 253  | 116  | 29  | 124 | 2669 | 2210 |
| 1329 | 1153 | 732  | 101 | 246 | 370  | 253  |
| 1378 | 1418 | 1478 | 45  | 93  | 305  | 737  |
| 95   | 173  | 47   | 32  | 38  | 1552 | 6757 |
| 704  | 573  | 316  | 8   | 80  | 836  | 1240 |
| 567  | 509  | 180  | 41  | 334 | 596  | 1151 |
| 2726 | 1012 | 608  | 98  | 229 | 1033 | 629  |
| 1000 | 895  | 584  | 4   | 181 | 1372 | 714  |
| 971  | 574  | 332  | 189 | 257 | 1310 | 364  |
| 1677 | 1299 | 918  | 69  | 311 | 451  | 322  |
| 505  | 755  | 528  | 46  | 250 | 283  | 255  |
| 390  | 485  | 234  | 25  | 108 | 631  | 1758 |
| 1436 | 1034 | 977  | 9   | 138 | 280  | 277  |
| 805  | 949  | 668  | 115 | 90  | 500  | 497  |
| 216  | 410  | 282  | 3   | 58  | 184  | 1045 |
| 263  | 236  | 156  | 37  | 226 | 1087 | 1734 |
| 966  | 716  | 481  | 10  | 103 | 377  | 318  |
| 829  | 798  | 807  | 49  | 135 | 291  | 282  |
| 96   | 131  | 37   | 9   | 43  | 849  | 3254 |
| 356  | 267  | 135  | 28  | 66  | 324  | 480  |
| 1704 | 805  | 366  | 137 | 212 | 402  | 518  |
| 970  | 706  | 377  | 20  | 79  | 184  | 201  |
| 2    | 13   | 18   | 2   | 1   | 171  | 4097 |
| 522  | 558  | 250  | 7   | 81  | 155  | 313  |
| 266  | 388  | 117  | 12  | 68  | 786  | 703  |
| 41   | 65   | 40   | 4   | 24  | 333  | 1680 |
| 149  | 205  | 119  | 11  | 32  | 196  | 801  |
| 675  | 598  | 441  | 40  | 71  | 196  | 115  |
| 608  | 577  | 345  | 29  | 68  | 256  | 155  |
| 663  | 658  | 404  | 31  | 208 | 205  | 151  |
| 29   | 59   | 28   | 5   | 21  | 495  | 1066 |
| 246  | 273  | 182  | 9   | 77  | 250  | 225  |
| 362  | 426  | 145  | 17  | 83  | 371  | 266  |
| 542  | 557  | 522  | 18  | 183 | 123  | 200  |
| 301  | 261  | 72   | 48  | 91  | 577  | 1037 |
| 40   | 96   | 82   | 4   | 25  | 560  | 2176 |
| 37   | 85   | 34   | 4   | 18  | 438  | 1580 |
| 392  | 311  | 191  | 39  | 115 | 83   | 110  |
| 173  | 212  | 132  | 69  | 139 | 251  | 184  |
| 65   | 120  | 102  | 8   | 39  | 301  | 1390 |
| 159  | 160  | 87   | 8   | 58  | 408  | 709  |
| 202  | 172  | 61   | 14  | 42  | 165  | 387  |
| 487  | 518  | 270  | 16  | 72  | 118  | 124  |
| 235  | 202  | 71   | 21  | 160 | 181  | 128  |
| 58   | 100  | 56   | 5   | 33  | 484  | 1041 |
| 582  | 305  | 196  | 10  | 126 | 69   | 212  |
| 658  | 368  | 230  | 33  | 71  | 169  | 308  |
| 200  | 219  | 67   | 7   | 41  | 215  | 908  |
| 156  | 288  | 108  | 16  | 31  | 209  | 577  |
| 156  | 288  | 108  | 16  | 31  | 209  | 577  |
| 126  | 154  | 69   | 28  | 97  | 171  | 197  |
| 185  | 207  | 190  | 1   | 52  | 102  | 133  |
| 226  | 155  | 150  | 0   | 28  | 48   | 101  |
| 311  | 131  | 51   | 2   | 44  | 664  | 466  |

|     |     |     |    |     |     |     |
|-----|-----|-----|----|-----|-----|-----|
| 238 | 166 | 62  | 4  | 16  | 144 | 278 |
| 6   | 18  | 10  | 0  | 15  | 111 | 976 |
| 299 | 338 | 149 | 20 | 22  | 98  | 114 |
| 143 | 146 | 129 | 20 | 106 | 99  | 122 |
| 289 | 282 | 195 | 0  | 29  | 126 | 108 |
| 243 | 226 | 167 | 56 | 21  | 71  | 99  |
| 346 | 357 | 149 | 84 | 42  | 123 | 70  |
| 74  | 51  | 31  | 1  | 7   | 334 | 83  |
| 261 | 119 | 33  | 7  | 32  | 148 | 81  |
| 131 | 150 | 58  | 9  | 40  | 245 | 382 |
| 165 | 141 | 92  | 7  | 26  | 32  | 78  |
| 49  | 48  | 42  | 1  | 14  | 154 | 604 |
| 153 | 130 | 81  | 1  | 53  | 105 | 93  |
| 128 | 119 | 79  | 0  | 18  | 133 | 114 |
| 123 | 172 | 110 | 3  | 21  | 122 | 247 |
| 131 | 135 | 77  | 3  | 18  | 126 | 289 |
| 172 | 102 | 101 | 10 | 33  | 76  | 52  |
| 165 | 134 | 106 | 2  | 25  | 126 | 166 |
| 96  | 94  | 70  | 7  | 10  | 61  | 51  |
| 340 | 174 | 136 | 12 | 24  | 80  | 39  |
| 128 | 106 | 68  | 15 | 47  | 90  | 193 |
| 1   | 15  | 6   | 3  | 13  | 68  | 632 |
| 92  | 117 | 112 | 5  | 10  | 93  | 55  |
| 202 | 85  | 89  | 4  | 19  | 31  | 44  |
| 90  | 44  | 21  | 10 | 17  | 74  | 131 |
| 58  | 61  | 48  | 13 | 17  | 102 | 76  |
| 84  | 89  | 75  | 9  | 31  | 71  | 68  |
| 60  | 44  | 21  | 6  | 14  | 34  | 105 |
| 21  | 41  | 26  | 3  | 14  | 155 | 207 |
| 135 | 67  | 22  | 0  | 8   | 220 | 314 |
| 166 | 104 | 53  | 6  | 21  | 43  | 59  |
| 286 | 241 | 137 | 0  | 9   | 8   | 27  |
| 55  | 80  | 100 | 13 | 21  | 59  | 57  |
| 101 | 122 | 88  | 51 | 46  | 119 | 72  |
| 133 | 67  | 80  | 5  | 28  | 20  | 29  |
| 72  | 83  | 86  | 1  | 28  | 28  | 43  |
| 110 | 149 | 140 | 2  | 4   | 76  | 166 |
| 5   | 9   | 5   | 0  | 2   | 37  | 646 |
| 90  | 79  | 30  | 2  | 34  | 31  | 22  |
| 139 | 64  | 101 | 20 | 12  | 79  | 11  |
| 38  | 34  | 10  | 1  | 17  | 71  | 217 |
| 42  | 33  | 13  | 3  | 31  | 51  | 79  |
| 96  | 80  | 78  | 3  | 14  | 54  | 63  |
| 66  | 60  | 69  | 6  | 31  | 35  | 30  |
| 78  | 96  | 102 | 3  | 6   | 13  | 26  |
| 14  | 15  | 9   | 1  | 8   | 67  | 337 |
| 57  | 67  | 43  | 1  | 4   | 65  | 109 |
| 72  | 83  | 38  | 6  | 14  | 16  | 20  |
| 62  | 43  | 26  | 2  | 10  | 92  | 173 |
| 103 | 95  | 69  | 2  | 24  | 60  | 44  |
| 49  | 35  | 26  | 1  | 16  | 48  | 31  |
| 32  | 26  | 5   | 2  | 8   | 71  | 268 |
| 139 | 79  | 96  | 25 | 15  | 45  | 25  |
| 56  | 51  | 50  | 9  | 11  | 48  | 35  |
| 43  | 54  | 34  | 7  | 14  | 60  | 99  |
| 57  | 42  | 28  | 1  | 10  | 16  | 35  |
| 140 | 75  | 53  | 4  | 31  | 47  | 24  |
| 56  | 93  | 40  | 0  | 17  | 102 | 62  |
| 13  | 17  | 6   | 2  | 6   | 103 | 217 |



|     |     |     |    |    |     |     |
|-----|-----|-----|----|----|-----|-----|
| 90  | 75  | 61  | 5  | 17 | 52  | 24  |
| 15  | 22  | 10  | 3  | 6  | 88  | 141 |
| 84  | 85  | 120 | 3  | 10 | 32  | 27  |
| 93  | 103 | 70  | 9  | 16 | 30  | 37  |
| 12  | 17  | 6   | 2  | 6  | 95  | 201 |
| 140 | 50  | 18  | 4  | 10 | 36  | 36  |
| 88  | 103 | 47  | 1  | 30 | 43  | 35  |
| 44  | 50  | 20  | 3  | 16 | 73  | 42  |
| 5   | 0   | 14  | 0  | 85 | 59  | 17  |
| 0   | 6   | 3   | 1  | 3  | 103 | 90  |
| 54  | 51  | 21  | 1  | 13 | 36  | 72  |
| 148 | 74  | 40  | 15 | 8  | 29  | 16  |
| 41  | 33  | 19  | 0  | 6  | 103 | 46  |
| 96  | 35  | 36  | 7  | 34 | 41  | 70  |
| 30  | 20  | 3   | 0  | 1  | 28  | 199 |
| 60  | 82  | 53  | 2  | 6  | 73  | 60  |
| 38  | 60  | 29  | 1  | 7  | 28  | 24  |
| 35  | 56  | 57  | 1  | 6  | 63  | 140 |
| 156 | 87  | 39  | 10 | 16 | 49  | 33  |
| 19  | 52  | 13  | 1  | 9  | 35  | 24  |
| 92  | 85  | 37  | 9  | 17 | 43  | 25  |
| 61  | 43  | 30  | 3  | 7  | 41  | 16  |
| 4   | 13  | 15  | 0  | 6  | 80  | 194 |
| 138 | 43  | 41  | 0  | 6  | 67  | 36  |
| 57  | 59  | 30  | 1  | 10 | 41  | 36  |
| 65  | 47  | 20  | 4  | 17 | 47  | 17  |
| 173 | 65  | 49  | 2  | 32 | 54  | 141 |
| 53  | 48  | 48  | 5  | 12 | 44  | 48  |
| 98  | 70  | 43  | 7  | 11 | 10  | 30  |
| 52  | 22  | 12  | 3  | 9  | 23  | 16  |
| 28  | 13  | 9   | 3  | 2  | 131 | 221 |
| 46  | 45  | 33  | 4  | 11 | 41  | 12  |
| 32  | 44  | 29  | 1  | 2  | 70  | 31  |
| 49  | 34  | 15  | 3  | 7  | 40  | 48  |
| 42  | 34  | 20  | 1  | 12 | 49  | 53  |
| 58  | 25  | 15  | 0  | 5  | 39  | 44  |
| 0   | 2   | 1   | 0  | 0  | 14  | 288 |
| 34  | 28  | 9   | 3  | 11 | 52  | 53  |
| 6   | 5   | 8   | 4  | 6  | 56  | 84  |
| 15  | 36  | 30  | 2  | 9  | 36  | 26  |
| 12  | 24  | 20  | 3  | 8  | 14  | 54  |
| 24  | 37  | 16  | 6  | 11 | 12  | 20  |
| 58  | 17  | 10  | 0  | 7  | 104 | 50  |
| 45  | 42  | 54  | 5  | 14 | 8   | 8   |
| 60  | 64  | 55  | 3  | 11 | 18  | 19  |
| 39  | 47  | 45  | 0  | 5  | 16  | 27  |
| 50  | 36  | 15  | 9  | 5  | 14  | 22  |
| 14  | 26  | 18  | 0  | 6  | 8   | 40  |
| 9   | 8   | 6   | 0  | 8  | 26  | 171 |
| 35  | 52  | 30  | 4  | 4  | 24  | 14  |
| 2   | 0   | 0   | 1  | 0  | 22  | 223 |
| 38  | 44  | 28  | 1  | 4  | 16  | 21  |
| 17  | 23  | 9   | 0  | 1  | 31  | 72  |
| 21  | 31  | 20  | 0  | 5  | 29  | 22  |
| 33  | 31  | 15  | 0  | 5  | 12  | 16  |
| 10  | 6   | 1   | 1  | 8  | 17  | 41  |
| 19  | 11  | 6   | 0  | 5  | 38  | 86  |
| 26  | 24  | 27  | 1  | 5  | 19  | 16  |
| 24  | 19  | 9   | 1  | 2  | 29  | 17  |

|    |    |    |   |    |    |     |
|----|----|----|---|----|----|-----|
| 13 | 14 | 2  | 0 | 4  | 10 | 19  |
| 1  | 3  | 2  | 1 | 4  | 21 | 92  |
| 25 | 23 | 9  | 3 | 4  | 22 | 31  |
| 25 | 23 | 9  | 3 | 4  | 22 | 31  |
| 65 | 17 | 23 | 4 | 4  | 12 | 10  |
| 38 | 41 | 32 | 1 | 1  | 8  | 11  |
| 9  | 19 | 13 | 3 | 8  | 30 | 27  |
| 59 | 22 | 9  | 0 | 9  | 30 | 21  |
| 19 | 11 | 7  | 0 | 7  | 12 | 15  |
| 35 | 24 | 10 | 1 | 6  | 15 | 17  |
| 6  | 9  | 7  | 0 | 3  | 4  | 17  |
| 14 | 14 | 6  | 0 | 4  | 22 | 33  |
| 21 | 35 | 51 | 0 | 8  | 9  | 15  |
| 12 | 7  | 2  | 0 | 4  | 12 | 29  |
| 15 | 10 | 8  | 1 | 31 | 4  | 7   |
| 57 | 44 | 33 | 0 | 4  | 11 | 22  |
| 12 | 21 | 14 | 0 | 4  | 6  | 24  |
| 1  | 0  | 0  | 1 | 0  | 9  | 149 |
| 12 | 13 | 7  | 0 | 7  | 12 | 13  |
| 9  | 8  | 3  | 2 | 3  | 29 | 47  |
| 71 | 46 | 25 | 0 | 8  | 7  | 9   |
| 15 | 13 | 20 | 2 | 1  | 19 | 13  |
| 8  | 8  | 3  | 2 | 3  | 22 | 42  |
| 39 | 28 | 7  | 2 | 6  | 11 | 12  |
| 39 | 41 | 35 | 8 | 2  | 22 | 9   |
| 16 | 7  | 9  | 0 | 2  | 34 | 31  |
| 19 | 20 | 24 | 1 | 6  | 15 | 6   |
| 0  | 0  | 0  | 0 | 0  | 4  | 113 |
| 41 | 33 | 43 | 0 | 6  | 8  | 14  |
| 14 | 14 | 22 | 5 | 2  | 6  | 9   |
| 17 | 13 | 16 | 0 | 1  | 3  | 27  |
| 34 | 17 | 13 | 0 | 2  | 10 | 11  |
| 17 | 19 | 7  | 1 | 4  | 30 | 13  |
| 1  | 2  | 0  | 1 | 0  | 9  | 39  |
| 18 | 13 | 7  | 1 | 15 | 14 | 17  |
| 8  | 4  | 0  | 0 | 1  | 9  | 14  |
| 0  | 0  | 0  | 0 | 0  | 0  | 3   |
| 38 | 31 | 22 | 4 | 3  | 15 | 13  |
| 14 | 4  | 3  | 3 | 0  | 8  | 13  |
| 12 | 15 | 23 | 5 | 6  | 12 | 11  |
| 32 | 17 | 9  | 1 | 10 | 16 | 9   |
| 26 | 16 | 7  | 0 | 4  | 10 | 3   |
| 48 | 15 | 7  | 0 | 4  | 24 | 18  |
| 32 | 21 | 7  | 0 | 1  | 15 | 8   |
| 30 | 24 | 23 | 4 | 2  | 4  | 8   |
| 17 | 13 | 9  | 1 | 7  | 10 | 11  |
| 8  | 3  | 0  | 0 | 0  | 8  | 11  |
| 36 | 7  | 4  | 0 | 6  | 10 | 9   |
| 2  | 1  | 0  | 0 | 0  | 78 | 58  |
| 0  | 6  | 0  | 0 | 0  | 10 | 72  |
| 12 | 4  | 1  | 0 | 3  | 28 | 20  |
| 33 | 25 | 25 | 2 | 5  | 10 | 5   |
| 7  | 18 | 5  | 0 | 3  | 19 | 31  |
| 41 | 49 | 36 | 0 | 7  | 1  | 3   |
| 39 | 11 | 12 | 2 | 5  | 5  | 12  |
| 8  | 6  | 3  | 1 | 2  | 3  | 39  |
| 19 | 14 | 14 | 2 | 4  | 19 | 20  |
| 10 | 7  | 4  | 0 | 7  | 10 | 12  |
| 16 | 9  | 5  | 0 | 1  | 4  | 11  |

|    |    |    |   |   |    |    |
|----|----|----|---|---|----|----|
| 10 | 3  | 0  | 0 | 1 | 36 | 15 |
| 43 | 20 | 7  | 0 | 2 | 8  | 5  |
| 16 | 23 | 12 | 0 | 4 | 2  | 15 |
| 16 | 29 | 15 | 0 | 3 | 3  | 0  |
| 6  | 7  | 15 | 0 | 4 | 13 | 4  |
| 8  | 7  | 1  | 0 | 1 | 7  | 13 |
| 42 | 16 | 14 | 2 | 4 | 2  | 3  |
| 31 | 10 | 36 | 0 | 1 | 2  | 2  |
| 26 | 23 | 29 | 0 | 2 | 3  | 7  |
| 20 | 4  | 6  | 1 | 6 | 5  | 5  |
| 3  | 4  | 4  | 0 | 8 | 7  | 10 |
| 21 | 11 | 4  | 2 | 4 | 8  | 3  |
| 1  | 3  | 1  | 0 | 1 | 14 | 52 |
| 0  | 1  | 0  | 0 | 0 | 20 | 56 |
| 12 | 11 | 7  | 0 | 1 | 19 | 7  |
| 3  | 3  | 1  | 0 | 3 | 19 | 26 |
| 10 | 7  | 5  | 0 | 1 | 5  | 4  |
| 31 | 5  | 7  | 0 | 4 | 7  | 1  |
| 12 | 8  | 10 | 0 | 1 | 2  | 5  |
| 12 | 8  | 5  | 0 | 0 | 2  | 0  |
| 14 | 20 | 14 | 0 | 1 | 3  | 11 |
| 5  | 4  | 1  | 0 | 2 | 5  | 71 |
| 11 | 18 | 8  | 0 | 3 | 3  | 3  |
| 27 | 16 | 10 | 0 | 2 | 13 | 5  |
| 13 | 15 | 5  | 1 | 1 | 4  | 6  |
| 15 | 6  | 3  | 0 | 2 | 13 | 13 |
| 15 | 10 | 1  | 2 | 0 | 1  | 0  |
| 12 | 14 | 15 | 0 | 1 | 5  | 8  |
| 6  | 13 | 7  | 1 | 1 | 2  | 14 |
| 5  | 4  | 11 | 0 | 2 | 4  | 4  |
| 16 | 9  | 3  | 3 | 2 | 7  | 6  |
| 23 | 12 | 16 | 1 | 0 | 13 | 4  |
| 4  | 1  | 1  | 0 | 1 | 5  | 33 |
| 21 | 17 | 9  | 0 | 1 | 3  | 2  |
| 2  | 2  | 2  | 1 | 0 | 14 | 28 |
| 11 | 5  | 3  | 0 | 1 | 8  | 5  |
| 12 | 12 | 7  | 0 | 1 | 1  | 0  |
| 14 | 13 | 5  | 0 | 0 | 2  | 4  |
| 1  | 0  | 1  | 0 | 0 | 22 | 4  |
| 5  | 9  | 7  | 0 | 2 | 9  | 1  |
| 13 | 11 | 4  | 0 | 2 | 5  | 11 |
| 16 | 12 | 8  | 0 | 1 | 2  | 2  |
| 23 | 14 | 4  | 0 | 0 | 2  | 1  |
| 7  | 4  | 6  | 3 | 1 | 1  | 6  |
| 15 | 11 | 10 | 0 | 2 | 5  | 0  |
| 26 | 20 | 5  | 0 | 4 | 5  | 3  |
| 5  | 11 | 17 | 0 | 2 | 7  | 2  |
| 1  | 2  | 0  | 0 | 1 | 23 | 61 |
| 6  | 4  | 3  | 0 | 0 | 9  | 8  |
| 4  | 10 | 4  | 0 | 0 | 3  | 3  |
| 11 | 7  | 4  | 0 | 2 | 3  | 5  |
| 10 | 7  | 2  | 0 | 2 | 5  | 5  |
| 4  | 14 | 1  | 2 | 1 | 0  | 9  |
| 0  | 1  | 0  | 1 | 1 | 10 | 23 |
| 6  | 3  | 2  | 0 | 1 | 0  | 7  |
| 1  | 1  | 5  | 1 | 2 | 9  | 11 |
| 2  | 4  | 0  | 0 | 3 | 5  | 13 |
| 5  | 6  | 2  | 0 | 0 | 5  | 5  |
| 0  | 0  | 1  | 0 | 2 | 8  | 26 |

|    |    |    |   |   |    |    |
|----|----|----|---|---|----|----|
| 5  | 3  | 3  | 0 | 1 | 8  | 7  |
| 5  | 1  | 1  | 0 | 1 | 1  | 8  |
| 5  | 9  | 2  | 0 | 1 | 2  | 8  |
| 6  | 5  | 3  | 0 | 4 | 3  | 5  |
| 6  | 3  | 4  | 0 | 1 | 2  | 1  |
| 4  | 7  | 2  | 1 | 0 | 8  | 10 |
| 10 | 10 | 10 | 0 | 5 | 1  | 2  |
| 1  | 4  | 0  | 0 | 0 | 4  | 23 |
| 0  | 0  | 1  | 0 | 1 | 4  | 12 |
| 13 | 7  | 1  | 0 | 3 | 2  | 0  |
| 2  | 4  | 2  | 0 | 0 | 0  | 2  |
| 3  | 3  | 3  | 0 | 0 | 4  | 2  |
| 8  | 2  | 3  | 0 | 2 | 3  | 4  |
| 3  | 4  | 6  | 0 | 1 | 1  | 8  |
| 17 | 7  | 4  | 1 | 0 | 1  | 2  |
| 0  | 1  | 2  | 0 | 0 | 6  | 14 |
| 15 | 5  | 2  | 1 | 1 | 6  | 3  |
| 2  | 7  | 2  | 0 | 0 | 4  | 1  |
| 5  | 8  | 4  | 0 | 0 | 1  | 5  |
| 6  | 4  | 3  | 1 | 2 | 1  | 3  |
| 11 | 5  | 11 | 1 | 1 | 1  | 4  |
| 8  | 3  | 3  | 0 | 2 | 1  | 2  |
| 6  | 2  | 1  | 0 | 1 | 1  | 3  |
| 14 | 4  | 1  | 0 | 2 | 4  | 6  |
| 8  | 4  | 1  | 1 | 0 | 2  | 8  |
| 5  | 8  | 2  | 0 | 4 | 3  | 1  |
| 2  | 5  | 0  | 0 | 5 | 7  | 4  |
| 3  | 4  | 1  | 0 | 1 | 1  | 2  |
| 5  | 5  | 9  | 0 | 0 | 3  | 1  |
| 0  | 3  | 1  | 0 | 0 | 6  | 5  |
| 0  | 0  | 2  | 0 | 0 | 0  | 0  |
| 9  | 1  | 5  | 1 | 2 | 2  | 5  |
| 7  | 3  | 2  | 1 | 1 | 5  | 8  |
| 1  | 1  | 1  | 0 | 0 | 6  | 9  |
| 5  | 3  | 2  | 0 | 1 | 1  | 2  |
| 4  | 1  | 2  | 1 | 1 | 2  | 5  |
| 2  | 3  | 2  | 1 | 0 | 13 | 10 |
| 6  | 0  | 1  | 0 | 0 | 0  | 2  |
| 6  | 6  | 5  | 0 | 1 | 4  | 4  |
| 20 | 5  | 0  | 0 | 2 | 0  | 2  |
| 2  | 1  | 0  | 0 | 0 | 4  | 5  |
| 4  | 6  | 2  | 0 | 0 | 0  | 2  |
| 1  | 0  | 0  | 0 | 0 | 0  | 6  |
| 0  | 1  | 0  | 1 | 1 | 0  | 12 |
| 3  | 6  | 2  | 0 | 3 | 4  | 4  |
| 15 | 4  | 7  | 0 | 0 | 2  | 2  |
| 6  | 8  | 3  | 0 | 0 | 0  | 0  |
| 2  | 0  | 0  | 0 | 1 | 3  | 13 |
| 6  | 10 | 2  | 0 | 1 | 2  | 0  |
| 9  | 5  | 2  | 0 | 1 | 3  | 3  |
| 0  | 0  | 0  | 0 | 0 | 0  | 24 |
| 0  | 0  | 0  | 0 | 0 | 1  | 18 |
| 0  | 0  | 0  | 0 | 0 | 1  | 17 |
| 2  | 4  | 1  | 0 | 0 | 8  | 2  |
| 6  | 3  | 5  | 0 | 0 | 4  | 2  |
| 11 | 3  | 1  | 0 | 1 | 1  | 0  |
| 1  | 1  | 6  | 0 | 0 | 1  | 3  |
| 1  | 5  | 4  | 2 | 1 | 4  | 2  |
| 0  | 1  | 0  | 0 | 0 | 2  | 40 |

|    |   |   |   |   |    |    |
|----|---|---|---|---|----|----|
| 0  | 0 | 0 | 0 | 0 | 3  | 6  |
| 3  | 2 | 1 | 0 | 0 | 2  | 4  |
| 0  | 1 | 0 | 0 | 0 | 1  | 18 |
| 12 | 2 | 2 | 1 | 1 | 5  | 3  |
| 9  | 7 | 3 | 0 | 0 | 0  | 0  |
| 5  | 3 | 9 | 0 | 0 | 3  | 1  |
| 0  | 1 | 0 | 0 | 0 | 2  | 10 |
| 5  | 5 | 6 | 0 | 0 | 0  | 10 |
| 0  | 0 | 0 | 0 | 0 | 1  | 2  |
| 4  | 3 | 1 | 0 | 0 | 0  | 1  |
| 2  | 1 | 0 | 0 | 0 | 1  | 4  |
| 0  | 0 | 2 | 0 | 0 | 1  | 18 |
| 5  | 8 | 0 | 0 | 0 | 6  | 4  |
| 5  | 6 | 3 | 0 | 1 | 2  | 1  |
| 14 | 5 | 3 | 0 | 0 | 1  | 2  |
| 2  | 0 | 1 | 0 | 2 | 0  | 8  |
| 2  | 4 | 5 | 0 | 1 | 1  | 0  |
| 4  | 2 | 2 | 0 | 0 | 0  | 4  |
| 7  | 5 | 4 | 0 | 0 | 4  | 3  |
| 5  | 7 | 0 | 0 | 1 | 3  | 8  |
| 7  | 1 | 1 | 0 | 0 | 4  | 4  |
| 0  | 1 | 0 | 0 | 0 | 8  | 41 |
| 2  | 4 | 1 | 1 | 3 | 1  | 3  |
| 6  | 2 | 3 | 0 | 2 | 2  | 0  |
| 2  | 4 | 3 | 0 | 0 | 3  | 3  |
| 1  | 2 | 1 | 0 | 0 | 1  | 0  |
| 1  | 0 | 1 | 0 | 0 | 5  | 8  |
| 0  | 1 | 0 | 0 | 0 | 9  | 11 |
| 2  | 0 | 0 | 0 | 1 | 2  | 0  |
| 2  | 2 | 3 | 0 | 0 | 2  | 0  |
| 2  | 2 | 2 | 1 | 0 | 1  | 2  |
| 2  | 3 | 1 | 1 | 1 | 4  | 4  |
| 0  | 0 | 0 | 0 | 0 | 3  | 7  |
| 1  | 7 | 2 | 0 | 1 | 5  | 2  |
| 1  | 2 | 0 | 0 | 0 | 1  | 6  |
| 3  | 4 | 1 | 0 | 0 | 2  | 2  |
| 2  | 1 | 3 | 1 | 0 | 1  | 2  |
| 2  | 3 | 3 | 0 | 2 | 4  | 2  |
| 3  | 0 | 3 | 0 | 1 | 4  | 0  |
| 4  | 5 | 6 | 0 | 1 | 5  | 0  |
| 1  | 5 | 3 | 0 | 0 | 0  | 1  |
| 5  | 4 | 6 | 0 | 1 | 1  | 1  |
| 3  | 3 | 2 | 0 | 0 | 1  | 2  |
| 2  | 1 | 1 | 1 | 0 | 0  | 1  |
| 1  | 5 | 1 | 0 | 0 | 7  | 2  |
| 0  | 0 | 0 | 0 | 0 | 2  | 6  |
| 3  | 1 | 6 | 0 | 0 | 0  | 2  |
| 0  | 1 | 0 | 0 | 0 | 2  | 17 |
| 7  | 4 | 1 | 0 | 1 | 0  | 1  |
| 1  | 0 | 1 | 0 | 0 | 1  | 8  |
| 0  | 1 | 1 | 0 | 0 | 0  | 6  |
| 4  | 0 | 0 | 0 | 0 | 8  | 2  |
| 0  | 1 | 1 | 0 | 0 | 3  | 3  |
| 1  | 2 | 6 | 0 | 0 | 0  | 3  |
| 1  | 1 | 0 | 0 | 0 | 4  | 7  |
| 0  | 0 | 1 | 0 | 0 | 1  | 3  |
| 1  | 3 | 2 | 2 | 1 | 0  | 0  |
| 1  | 0 | 0 | 0 | 0 | 10 | 2  |
| 0  | 1 | 0 | 0 | 0 | 2  | 12 |

|        |        |        |      |       |       |        |
|--------|--------|--------|------|-------|-------|--------|
| 1      | 3      | 1      | 0    | 1     | 0     | 0      |
| 0      | 1      | 1      | 0    | 0     | 0     | 1      |
| 0      | 0      | 0      | 0    | 0     | 2     | 13     |
| 0      | 1      | 0      | 0    | 0     | 3     | 14     |
| 2      | 1      | 3      | 0    | 1     | 0     | 0      |
| 4      | 7      | 4      | 0    | 1     | 0     | 0      |
| 2      | 1      | 1      | 0    | 0     | 2     | 2      |
| 11     | 3      | 3      | 0    | 1     | 0     | 0      |
| 5      | 2      | 4      | 0    | 0     | 1     | 1      |
| 0      | 0      | 0      | 0    | 0     | 3     | 12     |
| 0      | 1      | 0      | 0    | 1     | 0     | 10     |
| 0      | 0      | 0      | 0    | 0     | 3     | 6      |
| 4      | 4      | 0      | 0    | 0     | 1     | 1      |
| 3      | 0      | 2      | 0    | 0     | 3     | 3      |
| 5      | 1      | 0      | 1    | 1     | 0     | 0      |
| 0      | 1      | 4      | 0    | 0     | 2     | 0      |
| 0      | 3      | 3      | 0    | 0     | 2     | 3      |
| 2      | 5      | 1      | 0    | 0     | 1     | 2      |
| 1      | 2      | 0      | 0    | 0     | 1     | 4      |
| 1      | 1      | 2      | 0    | 0     | 3     | 0      |
| 4      | 2      | 5      | 0    | 1     | 1     | 1      |
| 1      | 0      | 0      | 0    | 0     | 3     | 5      |
| 4      | 0      | 4      | 0    | 0     | 3     | 0      |
| 5      | 4      | 3      | 0    | 0     | 0     | 1      |
| 4      | 3      | 3      | 0    | 1     | 3     | 0      |
| 6      | 4      | 1      | 0    | 1     | 0     | 0      |
| 2      | 2      | 2      | 0    | 0     | 1     | 2      |
| 9      | 3      | 1      | 0    | 1     | 2     | 1      |
| 0      | 1      | 1      | 0    | 0     | 3     | 1      |
| 3      | 4      | 4      | 0    | 1     | 2     | 1      |
| 0      | 1      | 2      | 0    | 0     | 2     | 0      |
| 7      | 0      | 1      | 0    | 0     | 0     | 1      |
| 0      | 1      | 0      | 0    | 0     | 1     | 11     |
| 0      | 1      | 0      | 0    | 0     | 0     | 2      |
| 0      | 2      | 2      | 0    | 0     | 0     | 9      |
| 0      | 1      | 0      | 0    | 0     | 2     | 1      |
| 0      | 2      | 0      | 0    | 1     | 0     | 2      |
| 2      | 0      | 1      | 0    | 0     | 1     | 1      |
| 3      | 2      | 1      | 1    | 0     | 0     | 0      |
| 1      | 3      | 2      | 0    | 0     | 0     | 5      |
| 0      | 0      | 0      | 0    | 0     | 0     | 2      |
| 2      | 4      | 1      | 0    | 0     | 0     | 2      |
| 4      | 0      | 0      | 0    | 0     | 0     | 1      |
| 0      | 1      | 1      | 0    | 0     | 4     | 4      |
| 1      | 0      | 0      | 0    | 0     | 0     | 1      |
| 2      | 4      | 4      | 0    | 0     | 0     | 3      |
| 4      | 4      | 2      | 0    | 1     | 2     | 1      |
| 0      | 1      | 2      | 0    | 1     | 0     | 0      |
| 2      | 2      | 0      | 0    | 0     | 1     | 0      |
| 0      | 0      | 0      | 0    | 0     | 1     | 0      |
| 1      | 2      | 2      | 0    | 1     | 2     | 0      |
| 2      | 0      | 2      | 0    | 0     | 3     | 4      |
| 57358  | 52086  | 38665  | 3705 | 12768 | 54908 | 75187  |
| 131926 | 121159 | 105787 | 9030 | 22399 | 96148 | 122273 |
| 385    | 390    | 408    | 475  | 444   | 386   | 369    |
| UC     | UC     | UC     | UC   | UC    | UC    | CHR_NP |
| UC     | UC     | UC     | UC   | UC    | UC    | CHR_NP |

|         |         |         |        |        |         |         |
|---------|---------|---------|--------|--------|---------|---------|
| 22      | 23      | 24      | 25     | 26     | 27      | 28      |
| 22      | 23      | 24      | 25     | 26     | 27      | 1       |
| UC      | UC      | UC      | UC     | UC     | UC      | CHR_NP  |
| F_6     | F_7     | F_8     | G_33   | G_34   | G_8     | A_1     |
| 1873959 | 1687678 | 1238990 | 121924 | 416015 | 1782397 | 2570804 |
| UC      | UC      | UC      | UC     | UC     | UC      | CHR_NP  |
| 11.98   | 12.33   | 14.79   | 3.24   | 6.65   | 8.93    | 6.98    |
| 2.11    | 2.10    | 1.41    | 12.29  | 6.06   | 3.47    | 0.77    |
| 3.70    | 2.91    | 2.57    | 1.57   | 3.14   | 1.02    | 0.26    |
| 2.69    | 2.95    | 2.67    | 5.40   | 2.89   | 2.64    | 2.05    |
| 3.41    | 3.26    | 3.24    | 2.47   | 3.76   | 1.14    | 0.54    |
| 0.16    | 0.28    | 0.24    | 0.33   | 0.49   | 2.91    | 5.71    |
| 0.97    | 0.87    | 0.48    | 1.38   | 1.99   | 1.92    | 1.73    |
| 0.03    | 0.08    | 0.04    | 0.06   | 0.07   | 0.88    | 3.19    |
| 0.20    | 0.29    | 0.24    | 0.08   | 0.47   | 1.42    | 1.67    |
| 0.35    | 0.35    | 0.26    | 0.35   | 0.60   | 1.18    | 1.20    |
| 0.30    | 0.39    | 0.34    | 0.09   | 0.38   | 0.45    | 0.54    |
| 0.61    | 0.67    | 0.56    | 0.38   | 0.54   | 0.47    | 0.37    |
| 0.39    | 0.41    | 0.26    | 0.27   | 0.37   | 0.42    | 0.64    |
| 0.46    | 0.59    | 0.79    | 0.53   | 0.44   | 0.35    | 0.30    |
| 0.07    | 0.09    | 0.04    | 0.09   | 0.06   | 0.31    | 1.02    |
| 0.69    | 0.53    | 0.63    | 0.05   | 0.09   | 0.07    | 0.09    |
| 0.04    | 0.04    | 0.02    | 0.10   | 0.13   | 0.32    | 0.43    |
| 0.21    | 0.23    | 0.16    | 0.10   | 0.14   | 0.13    | 0.22    |
| 0.10    | 0.11    | 0.06    | 0.08   | 0.18   | 0.35    | 0.44    |
| 0.25    | 0.23    | 0.16    | 0.24   | 0.23   | 0.19    | 0.16    |
| 0.22    | 0.23    | 0.15    | 0.06   | 0.11   | 0.07    | 0.07    |
| 0.13    | 0.14    | 0.10    | 0.07   | 0.16   | 0.19    | 0.14    |
| 0.14    | 0.13    | 0.07    | 0.07   | 0.14   | 0.21    | 0.17    |
| 0.08    | 0.08    | 0.02    | 0.26   | 0.22   | 0.06    | 0.23    |
| 0.02    | 0.03    | 0.02    | 0.06   | 0.12   | 0.12    | 0.41    |
| 0.19    | 0.15    | 0.13    | 0.01   | 0.09   | 0.11    | 0.11    |
| 0.19    | 0.25    | 0.34    | 0.13   | 0.17   | 0.09    | 0.05    |
| 0.05    | 0.05    | 0.03    | 0.04   | 0.03   | 0.32    | 0.27    |
| 0.08    | 0.10    | 0.07    | 0.12   | 0.09   | 0.10    | 0.19    |
| 0.17    | 0.15    | 0.12    | 0.08   | 0.17   | 0.14    | 0.06    |
| 0.10    | 0.08    | 0.05    | 0.08   | 0.11   | 0.13    | 0.06    |
| 0.23    | 0.21    | 0.15    | 0.22   | 0.16   | 0.11    | 0.09    |
| 0.03    | 0.04    | 0.02    | 0.03   | 0.06   | 0.13    | 0.34    |
| 0.01    | 0.03    | 0.02    | 0.02   | 0.02   | 0.05    | 0.53    |
| 0.07    | 0.09    | 0.06    | 0.11   | 0.08   | 0.09    | 0.13    |
| 0.06    | 0.10    | 0.11    | 0.22   | 0.14   | 0.10    | 0.05    |
| 0.05    | 0.06    | 0.04    | 0.13   | 0.07   | 0.14    | 0.14    |
| 0.02    | 0.03    | 0.03    | 0.08   | 0.09   | 0.09    | 0.16    |
| 0.06    | 0.07    | 0.07    | 0.29   | 0.14   | 0.06    | 0.05    |
| 0.33    | 0.11    | 0.09    | 0.13   | 0.08   | 0.03    | 0.04    |
| 0.16    | 0.12    | 0.10    | 0.20   | 0.04   | 0.02    | 0.02    |
| 0.09    | 0.09    | 0.11    | 0.05   | 0.11   | 0.02    | 0.02    |
| 0.06    | 0.06    | 0.07    | 0.10   | 0.06   | 0.05    | 0.04    |
| 0.00    | 0.01    | 0.01    | 0.02   | 0.01   | 0.11    | 0.20    |
| 0.05    | 0.05    | 0.04    | 0.04   | 0.11   | 0.03    | 0.04    |
| 0.07    | 0.07    | 0.05    | 0.03   | 0.05   | 0.04    | 0.03    |
| 0.05    | 0.04    | 0.03    | 0.03   | 0.08   | 0.06    | 0.07    |
| 0.11    | 0.07    | 0.09    | 0.02   | 0.04   | 0.03    | 0.02    |
| 0.00    | 0.00    | 0.00    | 0.00   | 0.00   | 0.02    | 0.23    |
| 0.01    | 0.02    | 0.01    | 0.00   | 0.01   | 0.03    | 0.12    |
| 0.06    | 0.03    | 0.02    | 0.07   | 0.06   | 0.05    | 0.01    |
| 0.02    | 0.02    | 0.01    | 0.05   | 0.05   | 0.02    | 0.03    |











|       |       |       |       |       |       |       |
|-------|-------|-------|-------|-------|-------|-------|
| -0.77 | -0.60 | -0.70 | -1.02 | -0.24 | 1.65  | 2.15  |
| -1.04 | -1.05 | -1.29 | -1.05 | -0.41 | 1.07  | 1.12  |
| -0.65 | -0.30 | -0.51 | -1.42 | -0.36 | -0.07 | 0.27  |
| 1.04  | 1.58  | 0.57  | -0.97 | 0.43  | -0.16 | -1.11 |
| 0.21  | 0.30  | -0.56 | -0.51 | 0.09  | 0.35  | 1.60  |
| -0.06 | 0.73  | 1.83  | 0.38  | -0.14 | -0.67 | -0.97 |
| -0.69 | -0.60 | -0.83 | -0.57 | -0.74 | 0.41  | 3.67  |
| 1.71  | 1.01  | 1.46  | -1.06 | -0.90 | -0.98 | -0.88 |
| -0.73 | -0.74 | -0.86 | -0.34 | -0.19 | 1.00  | 1.74  |
| -0.09 | 0.11  | -0.49 | -1.15 | -0.73 | -0.82 | 0.06  |
| -0.70 | -0.68 | -1.05 | -0.94 | -0.01 | 1.52  | 2.29  |
| 0.20  | 0.04  | -0.70 | 0.09  | 0.02  | -0.36 | -0.75 |
| 1.08  | 1.15  | -0.14 | -1.54 | -0.70 | -1.39 | -1.44 |
| -0.39 | -0.20 | -0.71 | -1.27 | 0.19  | 0.61  | -0.21 |
| 0.22  | 0.12  | -0.61 | -0.66 | 0.20  | 1.18  | 0.64  |
| -0.38 | -0.41 | -0.98 | 1.32  | 0.96  | -0.54 | 1.00  |
| -0.63 | -0.62 | -0.64 | -0.41 | -0.03 | -0.05 | 1.67  |
| 1.34  | 0.69  | 0.24  | -1.91 | -0.47 | -0.12 | -0.18 |
| 0.79  | 1.83  | 3.16  | -0.15 | 0.53  | -0.74 | -1.36 |
| -0.60 | -0.56 | -0.80 | -0.74 | -0.77 | 1.97  | 1.52  |
| -0.60 | -0.19 | -0.77 | 0.16  | -0.33 | -0.16 | 1.56  |
| 1.68  | 1.17  | 0.47  | -0.61 | 1.57  | 0.79  | -0.98 |
| 0.11  | -0.20 | -1.01 | -0.32 | 0.38  | 0.94  | -0.66 |
| 2.08  | 1.72  | 0.64  | 1.86  | 0.79  | -0.24 | -0.53 |
| -0.47 | -0.34 | -0.55 | -0.47 | 0.04  | 1.07  | 4.26  |
| -0.34 | -0.25 | -0.30 | -0.30 | -0.27 | -0.12 | 2.49  |
| -0.49 | -0.05 | -0.69 | 0.31  | -0.25 | -0.09 | 0.71  |
| -0.48 | -0.27 | -0.19 | 0.47  | -0.03 | -0.27 | -0.56 |
| -0.77 | -0.57 | -0.90 | 0.16  | -0.52 | 0.32  | 0.29  |
| -0.74 | -0.62 | -0.69 | -0.15 | 0.02  | -0.03 | 0.67  |
| -0.51 | -0.37 | -0.40 | 2.27  | 0.45  | -0.45 | -0.61 |
| 1.82  | 0.09  | -0.07 | 0.25  | -0.17 | -0.58 | -0.52 |
| 1.65  | 0.92  | 0.42  | 2.62  | -0.84 | -1.23 | -1.13 |
| 0.75  | 0.69  | 1.22  | -0.65 | 1.18  | -1.33 | -1.59 |
| -0.23 | -0.32 | 0.12  | 1.60  | -0.13 | -0.78 | -1.00 |
| -0.83 | -0.70 | -0.76 | -0.55 | -0.69 | 1.77  | 4.11  |
| -0.22 | -0.34 | -0.49 | -0.50 | 0.92  | -0.65 | -0.52 |
| 1.82  | 1.48  | 0.47  | -0.96 | 0.45  | -0.62 | -1.11 |
| 0.26  | -0.05 | -0.47 | -0.49 | 1.62  | 0.93  | 1.01  |
| 1.85  | 0.78  | 1.42  | -1.05 | -0.37 | -0.57 | -1.00 |
| -0.34 | -0.24 | -0.28 | -0.29 | -0.26 | 0.30  | 7.55  |
| -0.39 | -0.19 | -0.53 | -0.65 | -0.42 | 0.04  | 1.96  |
| 1.06  | -0.36 | -0.75 | 1.78  | 1.21  | 0.79  | -1.16 |
| -0.42 | -0.47 | -0.67 | 0.38  | 0.35  | -0.36 | -0.27 |
| -0.56 | 0.49  | 1.04  | 0.41  | 0.72  | -0.61 | -1.78 |
| -0.26 | -0.44 | -1.03 | -1.02 | -0.81 | -0.28 | 1.10  |
| 0.55  | 0.90  | 0.46  | -1.37 | -0.46 | 2.35  | 0.80  |

|       |       |       |       |       |       |       |
|-------|-------|-------|-------|-------|-------|-------|
| -0.32 | -0.25 | -0.25 | -0.34 | -0.32 | 0.27  | 6.29  |
| -1.06 | -0.72 | -1.10 | 0.54  | 0.82  | 0.23  | 0.53  |
| 1.50  | 0.66  | -0.36 | -0.69 | 0.64  | 0.09  | -0.39 |
| -0.54 | -0.13 | -0.04 | -1.33 | 1.75  | -1.24 | -1.08 |
| 0.63  | 0.11  | -0.42 | 2.90  | 0.52  | -0.43 | -0.82 |
| 0.08  | 0.06  | -0.45 | 0.26  | 1.36  | -0.50 | -0.64 |
| 0.33  | -0.12 | -0.40 | -1.44 | 0.10  | -0.47 | -0.76 |
| -0.68 | -0.64 | -0.67 | -0.39 | -0.49 | 2.24  | 19.45 |
| -0.27 | -0.24 | -0.23 | -0.21 | -0.21 | 0.03  | 7.70  |
| -0.25 | 0.23  | 0.88  | -0.36 | -1.42 | -0.64 | -1.17 |
| -0.99 | -0.61 | -0.88 | -0.52 | 0.19  | 1.59  | 2.58  |
| -0.53 | -0.29 | -0.41 | -0.63 | 0.17  | 0.87  | 0.85  |
| -0.67 | -0.40 | -0.62 | -0.47 | -0.20 | 2.60  | 5.46  |
| -0.22 | -0.34 | -0.44 | -0.65 | 0.39  | -0.69 | -0.10 |
| -0.36 | -0.37 | -0.39 | -0.33 | -0.30 | 0.20  | -0.05 |
| 0.11  | 0.04  | -0.19 | 0.40  | -0.16 | -1.04 | -1.28 |
| 0.36  | 0.67  | 1.76  | -0.82 | -1.30 | -1.47 | -1.05 |
| -0.79 | -0.63 | -0.83 | -0.13 | -0.66 | 1.70  | 7.47  |
| -0.21 | -0.38 | -0.75 | -1.54 | -1.00 | 0.18  | 0.35  |
| -0.14 | -0.16 | -0.79 | 0.00  | 1.88  | -0.02 | 0.53  |
| 2.50  | 0.18  | -0.12 | 0.76  | 0.06  | 0.13  | -0.73 |
| 0.36  | 0.33  | 0.07  | -1.63 | -0.04 | 1.27  | -0.61 |
| -0.11 | -0.27 | -0.33 | 0.78  | -0.03 | 0.07  | -0.43 |
| 1.07  | 0.67  | 0.57  | 0.10  | 0.62  | -0.86 | -1.22 |
| -0.56 | -0.03 | -0.11 | -0.22 | 0.45  | -0.90 | -1.07 |
| -0.83 | -0.34 | -0.98 | -0.84 | -0.50 | 0.09  | 2.43  |
| 1.82  | 1.08  | 1.85  | -1.41 | -0.21 | -1.03 | -1.23 |
| -0.23 | 0.15  | 0.07  | 1.34  | -0.88 | -0.69 | -0.92 |
| -0.34 | -0.14 | -0.17 | -0.47 | -0.30 | -0.36 | 0.14  |
| -0.56 | -0.57 | -0.66 | 0.35  | 1.65  | 2.00  | 2.55  |
| 1.43  | 0.88  | 0.65  | -1.08 | -0.12 | -0.34 | -0.80 |
| 0.26  | 0.43  | 1.54  | 0.01  | -0.52 | -1.57 | -1.88 |
| -0.73 | -0.59 | -0.85 | -0.61 | -0.45 | 1.54  | 6.13  |
| -0.57 | -0.86 | -1.29 | -0.21 | -0.85 | -0.65 | -0.52 |
| 2.21  | 0.45  | -0.30 | 3.11  | 0.59  | -0.56 | -0.61 |
| 2.31  | 1.45  | 0.47  | -0.65 | -0.45 | -1.18 | -1.35 |
| -0.31 | -0.27 | -0.23 | -0.21 | -0.30 | 0.27  | 9.91  |
| 0.65  | 1.08  | -0.05 | -1.26 | -0.08 | -1.02 | -0.66 |
| -0.23 | 0.34  | -0.55 | -0.51 | -0.09 | 1.73  | 0.73  |
| -0.56 | -0.46 | -0.50 | -0.49 | -0.34 | 0.46  | 3.56  |
| -0.67 | -0.41 | -0.58 | -0.60 | -0.69 | -0.48 | 0.93  |
| 0.92  | 0.85  | 0.84  | 0.69  | -0.56 | -1.03 | -1.52 |
| 1.40  | 1.59  | 0.76  | 0.34  | -0.61 | -0.86 | -1.86 |
| 1.01  | 1.26  | 0.74  | 0.24  | 2.14  | -0.86 | -1.28 |
| -0.70 | -0.55 | -0.65 | -0.50 | -0.44 | 1.26  | 2.44  |
| -0.27 | -0.11 | -0.20 | -0.59 | 0.03  | -0.23 | -0.50 |
| 0.53  | 1.29  | -0.50 | -0.16 | 0.61  | 0.71  | -0.59 |
| 0.40  | 0.67  | 1.27  | -0.57 | 1.44  | -1.13 | -1.04 |

|       |       |       |       |       |       |       |
|-------|-------|-------|-------|-------|-------|-------|
| -0.26 | -0.28 | -0.54 | 0.38  | -0.10 | 0.18  | 0.45  |
| -1.30 | -0.92 | -0.82 | -1.17 | -0.88 | 1.85  | 8.06  |
| -0.79 | -0.51 | -0.73 | -0.67 | -0.57 | 1.32  | 5.07  |
| 0.43  | 0.17  | -0.14 | 1.54  | 1.08  | -1.18 | -1.19 |
| -0.53 | -0.38 | -0.47 | 1.75  | 0.62  | -0.30 | -0.61 |
| -0.83 | -0.46 | -0.36 | -0.51 | -0.22 | 0.55  | 4.67  |
| -0.29 | -0.18 | -0.49 | -0.52 | 0.38  | 1.47  | 2.23  |
| -0.25 | -0.33 | -0.94 | -0.16 | -0.34 | -0.44 | 0.32  |
| 1.91  | 2.64  | 1.15  | -0.19 | 0.47  | -1.29 | -1.54 |
| -0.01 | -0.08 | -0.75 | 0.51  | 2.78  | -0.27 | -0.80 |
| -0.92 | -0.55 | -0.74 | -0.78 | -0.29 | 2.22  | 4.25  |
| 2.31  | 0.71  | 0.41  | -0.47 | 2.20  | -1.01 | -0.43 |
| 2.87  | 0.97  | 0.48  | 1.76  | 0.32  | -0.76 | -0.32 |
| 0.19  | 0.65  | -0.93 | -0.83 | 0.02  | 0.47  | 5.68  |
| -0.20 | 0.98  | -0.17 | 0.47  | -0.33 | 0.26  | 1.89  |
| -0.20 | 0.98  | -0.17 | 0.47  | -0.33 | 0.26  | 1.89  |
| -0.60 | -0.39 | -0.71 | 0.89  | 0.90  | -0.34 | -0.48 |
| -0.12 | 0.15  | 0.48  | -1.18 | 0.18  | -0.61 | -0.64 |
| 0.35  | -0.24 | 0.31  | -2.06 | -0.72 | -1.52 | -1.24 |
| 1.00  | -0.05 | -0.49 | -0.77 | 0.29  | 3.42  | 1.28  |
| 0.65  | 0.22  | -0.49 | -0.73 | -0.65 | -0.04 | 0.44  |
| -0.35 | -0.27 | -0.30 | -0.39 | 0.04  | 0.34  | 4.34  |
| 0.59  | 1.14  | 0.00  | 0.67  | -0.92 | -0.89 | -1.01 |
| -0.16 | 0.00  | 0.26  | 1.29  | 2.72  | -0.50 | -0.59 |
| 1.08  | 1.28  | 1.08  | -1.52 | -0.35 | -0.33 | -0.78 |
| 0.33  | 0.37  | 0.36  | 4.15  | -0.58 | -0.70 | -0.69 |
| 0.55  | 0.73  | 0.06  | 4.30  | -0.07 | -0.31 | -0.60 |
| -0.22 | -0.35 | -0.42 | -0.64 | -0.53 | 1.79  | -0.29 |
| 1.83  | 0.06  | -1.05 | -0.25 | 0.23  | 0.38  | -0.88 |
| 0.08  | 0.50  | -0.47 | 0.18  | 0.68  | 1.62  | 2.05  |
| 0.03  | -0.04 | -0.17 | -0.36 | -0.30 | -0.88 | -0.70 |
| -0.37 | -0.33 | -0.24 | -0.71 | -0.23 | 0.75  | 3.75  |
| 0.32  | 0.17  | -0.18 | -1.77 | 1.62  | -0.34 | -0.93 |

| 19                                                                                                                                                                       | 20        | 21          | 22        | 23          | 24         | 25          |
|--------------------------------------------------------------------------------------------------------------------------------------------------------------------------|-----------|-------------|-----------|-------------|------------|-------------|
| 21                                                                                                                                                                       | 22        | 23          | 24        | 25          | 26         | 27          |
| CAAAGAATTCTCC CACTAGATTGTG <del>A</del> ACTGGACTTGG <del>i</del> CAAAGTGTCTGT <del>T</del> TCAGTGCCTACT <del>A</del> TGTCAGTTTGTCT <del>A</del> TGAGAACTGAA <del>A</del> |           |             |           |             |            |             |
| miR-186-5p                                                                                                                                                               | miR-28-3p | miR-378a-3p | miR-93-5p | miR-148a-3p | miR-223-3p | miR-146b-5p |
| 979581                                                                                                                                                                   | 903691    | 738230      | 679306    | 664224      | 624773     | 614674      |
| 0.09                                                                                                                                                                     | 0.42      | 0.38        | 1.24      | 0.38        | -0.15      | -0.58       |
| 0.03                                                                                                                                                                     | 3.14      | -1.59       | -1.25     | -1.27       | 0.42       | 2.00        |
| 0.71                                                                                                                                                                     | -0.33     | -0.62       | 2.48      | -0.65       | -0.05      | 0.04        |
| -0.64                                                                                                                                                                    | -0.84     | -0.58       | 1.64      | -0.45       | -0.48      | -0.40       |
| -0.43                                                                                                                                                                    | -0.57     | 0.66        | -0.94     | -1.13       | 0.78       | 0.49        |
| -1.04                                                                                                                                                                    | 0.22      | -0.55       | -1.32     | 1.18        | -0.90      | -0.40       |
| -1.09                                                                                                                                                                    | 0.15      | 0.66        | 0.26      | -0.16       | -0.98      | -0.68       |
| -0.87                                                                                                                                                                    | -0.99     | -0.36       | -0.80     | -0.75       | -0.87      | -0.71       |
| -0.22                                                                                                                                                                    | -0.89     | -0.95       | -0.23     | -0.85       | -0.70      | -0.23       |
| 0.51                                                                                                                                                                     | -0.17     | -0.60       | 0.26      | -0.72       | -0.59      | 0.81        |
| 1.40                                                                                                                                                                     | 1.11      | -0.84       | -0.93     | 0.10        | 1.52       | 3.99        |
| -0.81                                                                                                                                                                    | -0.82     | -0.14       | -1.03     | -0.69       | -0.97      | -0.56       |
| 2.54                                                                                                                                                                     | -0.26     | 2.12        | 0.95      | 2.66        | 0.75       | 0.27        |
| -0.92                                                                                                                                                                    | -1.04     | -0.42       | -0.38     | -1.14       | -0.78      | -0.63       |
| 0.42                                                                                                                                                                     | -0.22     | 1.33        | 1.27      | -0.28       | -0.41      | -0.41       |
| 1.89                                                                                                                                                                     | 0.03      | -0.23       | -0.06     | 0.58        | 0.24       | -0.20       |
| -0.30                                                                                                                                                                    | -0.02     | 1.83        | 0.22      | -0.54       | -0.62      | -0.47       |
| -0.46                                                                                                                                                                    | -0.70     | 0.97        | 1.62      | -0.70       | 0.30       | -0.49       |
| 0.75                                                                                                                                                                     | 2.92      | 0.82        | -0.44     | 2.30        | 3.13       | 0.20        |
| 1.09                                                                                                                                                                     | -0.41     | 0.33        | -0.54     | 0.81        | 1.28       | 0.70        |

|       |       |       |       |       |       |       |
|-------|-------|-------|-------|-------|-------|-------|
| -0.79 | -0.01 | -0.68 | -0.27 | 0.86  | -0.89 | -0.37 |
| -0.70 | 0.20  | 1.08  | -0.39 | 0.22  | -0.38 | -0.63 |
| -0.68 | 0.04  | 1.15  | -0.20 | 0.12  | -0.41 | -0.62 |
| -1.05 | -0.70 | -0.14 | -0.71 | -0.61 | -0.98 | -0.64 |
| -0.94 | 0.09  | -1.54 | -1.27 | -0.66 | 1.32  | -0.41 |
| -0.01 | 0.02  | -0.70 | 0.19  | 0.20  | 0.96  | -0.03 |
| 1.52  | -0.36 | -1.39 | 0.61  | 1.18  | -0.54 | -0.05 |
| 2.29  | -0.75 | -1.44 | -0.21 | 0.64  | 1.00  | 1.67  |
| 1.37  | 6.39  | -0.55 | -0.53 | 4.72  | 0.89  | 2.81  |
| -0.14 | 3.15  | -0.50 | 0.28  | 0.93  | -0.17 | 1.13  |
| -1.00 | 0.86  | -0.84 | 1.77  | -0.75 | -0.97 | -0.57 |
| 1.28  | 7.78  | -0.24 | 0.04  | 2.64  | 0.21  | 6.40  |
| 0.34  | -1.27 | -0.17 | -1.04 | -0.90 | 4.39  | 0.09  |
| -0.63 | 0.17  | 0.23  | 0.09  | 0.24  | 0.45  | -0.67 |
| -0.36 | -0.58 | 0.20  | 0.76  | -0.44 | 0.49  | -0.67 |
| -0.10 | 0.44  | 1.05  | -0.65 | 0.05  | 0.23  | -0.36 |
| -1.40 | -1.95 | -1.85 | -1.72 | -1.35 | -1.10 | -0.75 |
| 0.17  | 1.25  | 1.05  | 0.49  | 1.63  | -0.44 | 0.30  |
| 2.29  | 0.68  | 1.70  | 2.86  | 1.31  | 1.40  | 0.25  |
| 0.28  | 0.13  | 1.69  | -0.56 | -0.62 | 0.80  | 0.03  |
| -1.37 | 0.78  | 2.06  | -1.02 | -0.90 | -0.92 | -0.44 |
| -1.42 | 0.78  | 9.02  | -0.94 | -0.86 | -0.73 | -0.04 |
| -0.52 | -0.02 | -0.89 | -0.17 | -0.56 | -0.45 | -0.50 |
| 1.34  | 1.61  | 0.67  | 1.30  | 4.26  | 0.74  | -0.41 |
| -0.53 | 0.55  | -0.22 | -1.23 | -0.77 | -0.58 | -0.39 |
| -1.41 | -0.43 | -0.69 | -1.70 | -1.32 | -1.03 | -0.62 |
| 1.57  | 0.34  | 0.47  | -0.60 | 1.09  | 3.98  | 0.48  |
| -0.49 | 0.89  | 0.77  | -0.63 | 0.62  | -0.10 | -0.44 |
| 0.40  | -1.03 | -0.55 | -0.22 | -0.59 | 0.46  | -0.50 |
| -0.09 | -0.28 | 1.25  | -0.56 | -0.63 | -0.19 | -0.39 |
| 0.40  | -0.53 | -0.08 | -0.42 | -0.48 | -0.33 | -0.09 |
| -0.69 | 0.20  | 0.17  | -0.24 | 0.65  | -0.40 | -0.57 |
| -0.98 | -0.67 | -0.42 | 0.04  | 0.23  | -0.68 | -0.65 |
| 0.23  | -0.30 | 0.65  | 0.46  | 1.01  | 0.88  | -0.31 |
| -0.82 | -0.41 | -0.74 | -1.14 | 0.55  | -0.75 | -0.57 |
| -0.74 | 0.06  | 0.59  | -0.52 | 0.40  | -0.57 | -0.57 |
| -0.32 | -0.90 | -0.66 | -0.27 | 0.32  | -0.70 | -0.49 |
| 3.12  | -0.74 | -0.92 | 0.02  | 0.21  | 0.91  | 1.14  |
| 0.25  | 1.00  | 0.18  | 0.31  | -0.07 | 0.76  | 0.02  |
| 1.17  | 0.70  | 0.00  | 0.22  | -0.18 | 1.94  | 0.10  |
| 1.04  | 0.13  | -0.57 | -0.67 | -0.77 | 2.97  | 0.77  |
| 3.62  | -0.78 | -1.16 | 0.60  | 0.77  | 0.25  | 0.53  |
| -0.70 | -1.04 | -0.95 | -0.01 | -0.22 | -0.26 | -0.61 |
| 0.08  | -0.79 | -0.94 | -0.18 | -0.58 | -0.72 | -0.38 |
| 0.59  | -0.82 | -1.03 | 0.28  | -0.11 | -0.19 | 0.69  |
| -0.68 | -0.20 | -0.22 | 2.75  | -0.38 | -0.59 | -0.14 |
| 2.16  | -0.48 | -0.75 | 1.74  | 0.26  | 0.24  | 0.02  |
| -0.32 | 7.04  | 0.40  | 0.80  | 0.43  | 0.13  | 1.40  |
| -0.64 | -1.10 | -0.30 | 4.05  | -1.02 | -0.34 | -0.39 |
| 1.01  | 0.12  | 0.84  | 3.41  | 0.07  | 1.83  | 0.36  |
| -0.59 | -0.35 | -0.90 | 1.24  | 0.15  | -0.39 | -0.49 |
| 0.22  | 1.34  | -0.39 | -1.31 | 1.49  | -0.62 | 0.49  |
| 0.08  | -1.13 | 0.11  | 0.15  | -0.51 | -0.71 | -0.32 |
| 1.05  | -0.70 | 0.69  | 0.58  | -0.82 | 0.40  | 1.01  |
| -1.42 | -0.71 | 5.89  | -1.85 | -1.38 | -0.94 | -0.71 |
| 0.30  | -0.85 | 0.10  | -0.09 | 0.02  | -0.51 | -0.29 |
| 0.15  | 2.53  | 1.10  | -0.41 | 0.87  | 0.60  | 1.03  |
| -0.21 | 3.15  | -0.49 | -1.23 | 0.81  | -0.58 | 0.87  |
| 1.07  | -0.71 | 1.73  | 1.72  | 0.85  | 1.76  | 0.96  |

|       |       |       |       |       |       |       |
|-------|-------|-------|-------|-------|-------|-------|
| 1.18  | 0.23  | 0.81  | -0.78 | 0.40  | 1.95  | 0.48  |
| -0.51 | -0.60 | -0.94 | -0.68 | -0.41 | -0.30 | -0.52 |
| 0.15  | 0.17  | 0.44  | -0.43 | 0.29  | 0.64  | 0.20  |
| -0.74 | -0.72 | -0.47 | -1.32 | -0.55 | -0.79 | -0.57 |
| 1.32  | -0.14 | 1.20  | -0.58 | 0.88  | 1.97  | 1.68  |
| 0.86  | -1.22 | 0.08  | -0.40 | 0.86  | 0.19  | 0.83  |
| 0.40  | -0.10 | -0.09 | -0.99 | -0.61 | 0.30  | -0.44 |
| 0.23  | -0.15 | 0.35  | -0.36 | 0.41  | 0.48  | -0.11 |
| -0.26 | -0.70 | -0.73 | -0.29 | 0.05  | -0.40 | -0.48 |
| 1.24  | 0.94  | 2.00  | -0.14 | 3.18  | 0.80  | 0.85  |
| 0.09  | -0.35 | 0.09  | -0.45 | -0.07 | 1.24  | -0.21 |
| 0.14  | -0.93 | 0.77  | 0.38  | 1.13  | 1.03  | 3.24  |
| -0.79 | 0.07  | 0.46  | -0.40 | 3.98  | -0.79 | -0.56 |
| -0.57 | -0.18 | 1.47  | -0.29 | 0.59  | -0.55 | -0.55 |
| 0.58  | 0.37  | -1.15 | 0.40  | 2.75  | 0.23  | 0.45  |
| 2.62  | 0.05  | -0.87 | 1.86  | 1.03  | 0.15  | -0.05 |

|      |      |      |      |      |      |      |
|------|------|------|------|------|------|------|
| -1   | -1   | -1   | -1   | 1    | -1   | 0    |
| 0.00 | 0.00 | 0.00 | 0.00 | 0.00 | 0.00 | 0.00 |
| 1.00 | 1.00 | 1.00 | 1.00 | 1.00 | 1.00 | 1.00 |
| 0.92 | 0.61 | 0.50 | 0.27 | 0.51 | 0.75 | 0.61 |

| 19            | 20           | 21          | 22          | 23           | 24           | 25          |
|---------------|--------------|-------------|-------------|--------------|--------------|-------------|
| CAAAGAATTCTCC | CACTAGATTGTG | ACTGGACTTGG | CAAAGTGCTGT | TCAGTGCCTACT | TGTCAGTTTGTC | TGAGAACTGAA |
| miR-186-5p    | miR-28-3p    | miR-378a-3p | miR-93-5p   | miR-148a-3p  | miR-223-3p   | miR-146b-5p |
| 979581        | 903691       | 738230      | 679306      | 664224       | 624773       | 614674      |
| 0.09          | 0.42         | 0.38        | 1.24        | 0.38         | -0.15        | -0.58       |
| 0.03          | 3.14         | -1.59       | -1.25       | -1.27        | 0.42         | 2.00        |
| 0.71          | -0.33        | -0.62       | 2.48        | -0.65        | -0.05        | 0.04        |
| -0.64         | -0.84        | -0.58       | 1.64        | -0.45        | -0.48        | -0.40       |
| -0.43         | -0.57        | 0.66        | -0.94       | -1.13        | 0.78         | 0.49        |
| -1.04         | 0.22         | -0.55       | -1.32       | 1.18         | -0.90        | -0.40       |
| -1.09         | 0.15         | 0.66        | 0.26        | -0.16        | -0.98        | -0.68       |
| -0.87         | -0.99        | -0.36       | -0.80       | -0.75        | -0.87        | -0.71       |
| -0.22         | -0.89        | -0.95       | -0.23       | -0.85        | -0.70        | -0.23       |
| 0.51          | -0.17        | -0.60       | 0.26        | -0.72        | -0.59        | 0.81        |
| 1.40          | 1.11         | -0.84       | -0.93       | 0.10         | 1.52         | 3.99        |
| -0.81         | -0.82        | -0.14       | -1.03       | -0.69        | -0.97        | -0.56       |
| 2.54          | -0.26        | 2.12        | 0.95        | 2.66         | 0.75         | 0.27        |
| -0.92         | -1.04        | -0.42       | -0.38       | -1.14        | -0.78        | -0.63       |
| 0.42          | -0.22        | 1.33        | 1.27        | -0.28        | -0.41        | -0.41       |
| 1.89          | 0.03         | -0.23       | -0.06       | 0.58         | 0.24         | -0.20       |
| -0.30         | -0.02        | 1.83        | 0.22        | -0.54        | -0.62        | -0.47       |
| -0.46         | -0.70        | 0.97        | 1.62        | -0.70        | 0.30         | -0.49       |
| 0.75          | 2.92         | 0.82        | -0.44       | 2.30         | 3.13         | 0.20        |
| 1.09          | -0.41        | 0.33        | -0.54       | 0.81         | 1.28         | 0.70        |
| -0.79         | -0.01        | -0.68       | -0.27       | 0.86         | -0.89        | -0.37       |
| -0.70         | 0.20         | 1.08        | -0.39       | 0.22         | -0.38        | -0.63       |
| -0.68         | 0.04         | 1.15        | -0.20       | 0.12         | -0.41        | -0.62       |
| -1.05         | -0.70        | -0.14       | -0.71       | -0.61        | -0.98        | -0.64       |
| -0.94         | 0.09         | -1.54       | -1.27       | -0.66        | 1.32         | -0.41       |
| -0.01         | 0.02         | -0.70       | 0.19        | 0.20         | 0.96         | -0.03       |
| 1.52          | -0.36        | -1.39       | 0.61        | 1.18         | -0.54        | -0.05       |
| 2.29          | -0.75        | -1.44       | -0.21       | 0.64         | 1.00         | 1.67        |



|       |       |       |       |       |       |       |
|-------|-------|-------|-------|-------|-------|-------|
| 1.37  | 6.39  | -0.55 | -0.53 | 4.72  | 0.89  | 2.81  |
| -0.14 | 3.15  | -0.50 | 0.28  | 0.93  | -0.17 | 1.13  |
| -1.00 | 0.86  | -0.84 | 1.77  | -0.75 | -0.97 | -0.57 |
| 1.28  | 7.78  | -0.24 | 0.04  | 2.64  | 0.21  | 6.40  |
| 0.34  | -1.27 | -0.17 | -1.04 | -0.90 | 4.39  | 0.09  |
| -0.63 | 0.17  | 0.23  | 0.09  | 0.24  | 0.45  | -0.67 |
| -0.36 | -0.58 | 0.20  | 0.76  | -0.44 | 0.49  | -0.67 |
| -0.10 | 0.44  | 1.05  | -0.65 | 0.05  | 0.23  | -0.36 |
| -1.40 | -1.95 | -1.85 | -1.72 | -1.35 | -1.10 | -0.75 |
| 0.17  | 1.25  | 1.05  | 0.49  | 1.63  | -0.44 | 0.30  |
| 2.29  | 0.68  | 1.70  | 2.86  | 1.31  | 1.40  | 0.25  |
| 0.28  | 0.13  | 1.69  | -0.56 | -0.62 | 0.80  | 0.03  |
| -1.37 | 0.78  | 2.06  | -1.02 | -0.90 | -0.92 | -0.44 |
| -1.42 | 0.78  | 9.02  | -0.94 | -0.86 | -0.73 | -0.04 |
| -0.52 | -0.02 | -0.89 | -0.17 | -0.56 | -0.45 | -0.50 |
| 1.34  | 1.61  | 0.67  | 1.30  | 4.26  | 0.74  | -0.41 |
| -0.53 | 0.55  | -0.22 | -1.23 | -0.77 | -0.58 | -0.39 |
| -1.41 | -0.43 | -0.69 | -1.70 | -1.32 | -1.03 | -0.62 |
| 1.57  | 0.34  | 0.47  | -0.60 | 1.09  | 3.98  | 0.48  |
| -0.49 | 0.89  | 0.77  | -0.63 | 0.62  | -0.10 | -0.44 |
| 0.40  | -1.03 | -0.55 | -0.22 | -0.59 | 0.46  | -0.50 |
| -0.09 | -0.28 | 1.25  | -0.56 | -0.63 | -0.19 | -0.39 |
| 0.40  | -0.53 | -0.08 | -0.42 | -0.48 | -0.33 | -0.09 |
| -0.69 | 0.20  | 0.17  | -0.24 | 0.65  | -0.40 | -0.57 |
| -0.98 | -0.67 | -0.42 | 0.04  | 0.23  | -0.68 | -0.65 |
| 0.23  | -0.30 | 0.65  | 0.46  | 1.01  | 0.88  | -0.31 |
| -0.82 | -0.41 | -0.74 | -1.14 | 0.55  | -0.75 | -0.57 |
| -0.74 | 0.06  | 0.59  | -0.52 | 0.40  | -0.57 | -0.57 |
| -0.32 | -0.90 | -0.66 | -0.27 | 0.32  | -0.70 | -0.49 |
| 3.12  | -0.74 | -0.92 | 0.02  | 0.21  | 0.91  | 1.14  |
| 0.25  | 1.00  | 0.18  | 0.31  | -0.07 | 0.76  | 0.02  |
| 1.17  | 0.70  | 0.00  | 0.22  | -0.18 | 1.94  | 0.10  |
| 1.04  | 0.13  | -0.57 | -0.67 | -0.77 | 2.97  | 0.77  |
| 3.62  | -0.78 | -1.16 | 0.60  | 0.77  | 0.25  | 0.53  |
| -0.70 | -1.04 | -0.95 | -0.01 | -0.22 | -0.26 | -0.61 |
| 0.08  | -0.79 | -0.94 | -0.18 | -0.58 | -0.72 | -0.38 |
| 0.59  | -0.82 | -1.03 | 0.28  | -0.11 | -0.19 | 0.69  |
| -0.68 | -0.20 | -0.22 | 2.75  | -0.38 | -0.59 | -0.14 |
| 2.16  | -0.48 | -0.75 | 1.74  | 0.26  | 0.24  | 0.02  |
| -0.32 | 7.04  | 0.40  | 0.80  | 0.43  | 0.13  | 1.40  |
| -0.64 | -1.10 | -0.30 | 4.05  | -1.02 | -0.34 | -0.39 |
| 1.01  | 0.12  | 0.84  | 3.41  | 0.07  | 1.83  | 0.36  |
| -0.59 | -0.35 | -0.90 | 1.24  | 0.15  | -0.39 | -0.49 |
| 0.22  | 1.34  | -0.39 | -1.31 | 1.49  | -0.62 | 0.49  |
| 0.08  | -1.13 | 0.11  | 0.15  | -0.51 | -0.71 | -0.32 |
| 1.05  | -0.70 | 0.69  | 0.58  | -0.82 | 0.40  | 1.01  |
| -1.42 | -0.71 | 5.89  | -1.85 | -1.38 | -0.94 | -0.71 |
| 0.30  | -0.85 | 0.10  | -0.09 | 0.02  | -0.51 | -0.29 |
| 0.15  | 2.53  | 1.10  | -0.41 | 0.87  | 0.60  | 1.03  |
| -0.21 | 3.15  | -0.49 | -1.23 | 0.81  | -0.58 | 0.87  |
| 1.07  | -0.71 | 1.73  | 1.72  | 0.85  | 1.76  | 0.96  |
| 1.18  | 0.23  | 0.81  | -0.78 | 0.40  | 1.95  | 0.48  |
| -0.51 | -0.60 | -0.94 | -0.68 | -0.41 | -0.30 | -0.52 |
| 0.15  | 0.17  | 0.44  | -0.43 | 0.29  | 0.64  | 0.20  |
| -0.74 | -0.72 | -0.47 | -1.32 | -0.55 | -0.79 | -0.57 |
| 1.32  | -0.14 | 1.20  | -0.58 | 0.88  | 1.97  | 1.68  |
| 0.86  | -1.22 | 0.08  | -0.40 | 0.86  | 0.19  | 0.83  |
| 0.40  | -0.10 | -0.09 | -0.99 | -0.61 | 0.30  | -0.44 |
| 0.23  | -0.15 | 0.35  | -0.36 | 0.41  | 0.48  | -0.11 |

|       |       |       |       |       |       |       |
|-------|-------|-------|-------|-------|-------|-------|
| -0.26 | -0.70 | -0.73 | -0.29 | 0.05  | -0.40 | -0.48 |
| 1.24  | 0.94  | 2.00  | -0.14 | 3.18  | 0.80  | 0.85  |
| 0.09  | -0.35 | 0.09  | -0.45 | -0.07 | 1.24  | -0.21 |
| 0.14  | -0.93 | 0.77  | 0.38  | 1.13  | 1.03  | 3.24  |
| -0.79 | 0.07  | 0.46  | -0.40 | 3.98  | -0.79 | -0.56 |
| -0.57 | -0.18 | 1.47  | -0.29 | 0.59  | -0.55 | -0.55 |
| 0.58  | 0.37  | -1.15 | 0.40  | 2.75  | 0.23  | 0.45  |
| 3     | 0     | -1    | 2     | 1     | 0     | 0     |

---

| 19          | 20            | 21           | 22          | 23            | 24            | 25          |
|-------------|---------------|--------------|-------------|---------------|---------------|-------------|
| 64          | 15            | 27           | 38          | 78            | 118           | 119         |
| CATAAAGTAGA | ATGAGGTAGTAGA | TAAAAGCTGGGT | TGAGAACTGAA | CACCCGTAGAACC | ACAGTAGTCTGCA | ACAGTAGTCTG |
| miR-142-5p  | let-7f-5p     | miR-320a     | miR-146a-5p | miR-99b-5p    | miR-199a-3p   | miR-199b-3p |
| 94911       | 1418336       | 549148       | 339140      | 56245         | 16186         | 16186       |
| -0.26       | -0.82         | 0.58         | -0.41       | -0.29         | -0.55         | -0.55       |
| -0.08       | -0.14         | -1.10        | 2.17        | 4.80          | -0.68         | -0.68       |
| -0.26       | 0.39          | -0.21        | -0.29       | -0.35         | -0.47         | -0.47       |
| -0.27       | -0.35         | -0.33        | -0.40       | -0.46         | -0.58         | -0.58       |
| -0.21       | 0.34          | -0.42        | 1.57        | 0.21          | 1.93          | 1.93        |
| -0.24       | -0.04         | -0.44        | -0.05       | -0.42         | -0.07         | -0.07       |
| -0.26       | -0.60         | 1.04         | -0.70       | -0.42         | 0.30          | 0.30        |
| -0.17       | -0.86         | -0.33        | -0.70       | -0.40         | -0.86         | -0.86       |
| -0.26       | -0.43         | -0.97        | -0.04       | -0.28         | -0.96         | -0.96       |
| -0.22       | 0.20          | -0.77        | 0.64        | -0.10         | -0.85         | -0.85       |
| -0.16       | 0.23          | -1.49        | 3.69        | 0.49          | 0.00          | 0.00        |
| -0.28       | 0.08          | 0.13         | -0.67       | -0.41         | -0.78         | -0.78       |
| 0.10        | 3.89          | -1.08        | 0.05        | -0.43         | 2.25          | 2.25        |
| -0.25       | -0.85         | 0.48         | -0.58       | -0.19         | -1.02         | -1.02       |
| -0.08       | 0.16          | 0.42         | -0.50       | -0.26         | -0.64         | -0.64       |
| -0.06       | 1.33          | -0.42        | 0.11        | -0.25         | 2.80          | 2.80        |
| -0.21       | -0.87         | 0.79         | -0.54       | -0.19         | -0.92         | -0.92       |
| -0.22       | 0.07          | 0.53         | -0.72       | -0.34         | 0.00          | 0.00        |
| -0.23       | -0.14         | -1.11        | 0.03        | -0.31         | -0.66         | -0.66       |
| 4.98        | 1.57          | -0.49        | -0.19       | -0.19         | 0.90          | 0.90        |
| -0.23       | -0.13         | -0.21        | -0.25       | -0.31         | -0.15         | -0.15       |
| -0.27       | -0.69         | 0.79         | -0.74       | -0.11         | -0.20         | -0.20       |
| -0.24       | -0.60         | 1.83         | -0.62       | -0.27         | 0.98          | 0.98        |
| -0.23       | -0.83         | 3.16         | -0.69       | -0.33         | -0.17         | -0.17       |
| -0.21       | -0.57         | -0.15        | -0.15       | 0.78          | 0.47          | 0.47        |
| -0.21       | -0.74         | 0.53         | 0.02        | -0.03         | -0.33         | -0.33       |
| 0.03        | 0.41          | -0.74        | -0.03       | 0.07          | 0.26          | 0.26        |
| 7.70        | 3.67          | -1.36        | 0.67        | -0.43         | 1.89          | 1.89        |
| -0.16       | 1.03          | -1.48        | 2.56        | -0.11         | 1.02          | 1.02        |
| -0.25       | -0.09         | -1.36        | 1.77        | -0.07         | -0.86         | -0.86       |
| -0.24       | -0.74         | 0.52         | 0.19        | 1.65          | -0.98         | -0.98       |
| -0.20       | 1.39          | -1.57        | 6.51        | 0.59          | 0.75          | 0.75        |
| -0.11       | 1.59          | -0.75        | 1.13        | 2.03          | 4.41          | 4.41        |
| -0.23       | -0.73         | -0.26        | -0.75       | -0.51         | -0.46         | -0.46       |
| -0.17       | -0.67         | -0.32        | -0.69       | -0.45         | -0.52         | -0.52       |
| -0.08       | -0.59         | -0.49        | -0.39       | -0.44         | -0.77         | -0.77       |
| -0.25       | -0.90         | 0.52         | -0.88       | -0.48         | -1.22         | -1.22       |
| -0.13       | 0.17          | -1.15        | 0.07        | -0.43         | -0.34         | -0.34       |
| -0.06       | 1.16          | -1.26        | 0.73        | -0.28         | 0.64          | 0.64        |

|       |       |       |       |       |       |       |
|-------|-------|-------|-------|-------|-------|-------|
| -0.22 | -0.28 | -0.78 | -0.39 | -0.39 | -0.61 | -0.61 |
| -0.24 | -0.88 | 3.78  | -0.58 | -0.07 | 0.13  | 0.13  |
| -0.19 | -0.84 | 20.61 | 0.29  | 1.30  | 1.26  | 1.26  |
| -0.16 | -0.75 | -0.32 | -0.15 | -0.09 | -0.09 | -0.09 |
| -0.19 | 0.18  | -1.18 | -0.54 | -0.20 | 2.03  | 2.03  |
| -0.22 | -0.66 | -0.15 | -0.46 | -0.21 | -0.76 | -0.76 |
| -0.16 | -0.92 | 4.71  | -0.70 | -0.32 | -0.54 | -0.54 |
| 0.07  | -0.02 | -1.09 | 0.50  | -0.14 | 0.93  | 0.93  |
| -0.20 | -0.40 | 0.45  | -0.49 | -0.39 | 0.16  | 0.16  |
| -0.17 | -0.28 | -0.26 | -0.60 | -0.30 | 0.44  | 0.44  |
| -0.13 | -0.65 | -0.22 | -0.35 | -0.41 | -0.38 | -0.38 |
| -0.14 | -0.19 | -0.62 | -0.01 | -0.37 | 1.69  | 1.69  |
| -0.20 | -0.80 | 1.17  | -0.31 | 0.21  | 0.17  | 0.17  |
| -0.24 | -0.70 | 1.00  | -0.52 | 0.42  | -0.17 | -0.17 |
| -0.24 | 0.01  | 0.23  | -0.31 | -0.02 | 2.07  | 2.07  |
| -0.24 | -0.31 | 0.22  | -0.31 | -0.20 | 0.18  | 0.18  |
| -0.25 | -0.81 | 0.28  | -0.32 | 0.53  | -0.43 | -0.43 |
| -0.24 | -0.20 | 0.07  | -0.22 | 0.32  | 0.58  | 0.58  |
| 4.81  | 2.56  | -0.83 | 0.00  | -0.27 | 1.95  | 1.95  |
| -0.25 | -0.59 | 1.87  | -0.36 | -0.21 | -0.39 | -0.39 |
| -0.19 | 0.82  | 1.12  | -0.08 | -0.22 | 2.51  | 2.51  |
| -0.06 | 0.45  | 0.80  | 0.97  | -0.03 | 2.77  | 2.77  |
| 3.55  | 2.24  | -0.97 | -0.38 | -0.29 | 0.92  | 0.92  |
| -0.24 | -0.81 | 0.87  | -0.68 | 0.28  | -0.93 | -0.93 |
| -0.25 | -0.46 | -0.15 | -0.31 | 0.16  | 0.18  | 0.18  |
| -0.21 | 0.15  | -0.31 | 0.20  | -0.18 | -0.36 | -0.36 |
| -0.28 | 2.44  | 3.48  | -0.22 | -0.49 | -0.55 | -0.55 |
| -0.17 | -0.19 | -1.09 | 0.76  | -0.38 | 0.55  | 0.55  |
| -0.24 | 0.05  | -1.07 | 4.06  | 2.88  | -0.84 | -0.84 |
| -0.28 | 0.77  | 3.76  | -0.19 | -0.44 | 0.80  | 0.80  |
| -0.24 | 0.55  | 0.22  | 0.44  | -0.33 | 1.87  | 1.87  |
| -0.26 | -0.36 | -0.33 | -0.46 | -0.41 | -0.45 | -0.45 |
| -0.01 | 4.99  | -1.95 | 0.36  | -0.54 | 2.16  | 2.16  |
| -0.24 | 0.60  | -0.66 | -0.11 | -0.40 | -0.33 | -0.33 |
| -0.24 | 1.39  | -0.61 | 0.39  | -0.43 | 0.00  | 0.00  |
| -0.25 | -0.97 | 25.44 | -0.70 | -0.14 | -1.12 | -1.12 |
| -0.22 | 1.68  | 0.66  | -0.52 | -0.41 | 0.77  | 0.77  |
| -0.24 | -0.07 | -1.20 | 0.68  | -0.16 | -0.63 | -0.63 |
| -0.24 | 0.51  | -1.21 | 0.92  | -0.17 | 0.04  | 0.04  |
| 0.12  | 0.61  | -0.67 | 0.49  | -0.32 | 0.64  | 0.64  |
| -0.04 | 0.28  | -1.17 | 1.31  | -0.12 | 0.69  | 0.69  |
| -0.13 | -0.77 | -0.01 | -0.50 | 0.18  | -1.01 | -1.01 |
| -0.06 | 0.32  | -0.50 | 0.72  | -0.27 | 0.35  | 0.35  |
| -0.18 | -0.69 | 0.03  | -0.69 | -0.32 | -0.33 | -0.33 |
| 6.06  | 2.11  | -0.62 | -0.35 | 0.21  | 1.64  | 1.64  |
| 8.26  | 4.03  | -1.11 | -0.25 | -0.42 | 0.28  | 0.28  |
| -0.19 | -0.64 | 0.11  | -0.43 | -0.01 | -0.06 | -0.06 |
| -0.18 | -0.06 | -0.40 | -0.21 | -0.36 | 0.29  | 0.29  |
| -0.20 | -0.54 | -0.14 | -0.27 | -0.36 | -0.51 | -0.51 |
| -0.23 | 1.49  | -1.03 | -0.05 | -0.40 | 0.13  | 0.13  |
| -0.21 | -0.46 | -0.38 | -0.31 | 0.19  | -0.16 | -0.16 |
| -0.19 | 5.96  | 0.95  | 0.14  | -0.35 | 0.02  | 0.02  |
| -0.25 | -0.58 | -0.75 | -0.61 | -0.33 | -0.59 | -0.59 |
| -0.21 | -0.65 | 0.52  | -0.63 | -0.20 | -0.18 | -0.18 |
| -0.24 | 0.08  | -1.14 | 0.57  | 0.03  | 0.27  | 0.27  |
| -0.22 | -0.55 | -0.36 | 0.26  | -0.03 | 0.85  | 0.85  |
| 0.06  | 0.06  | 0.06  | 0.06  | 0.06  | 0.06  | 0.06  |
| 0.14  | 0.04  | 0.10  | 0.04  | 0.06  | 0.06  | 0.06  |











































































































































































|         |         |         |        |         |         |        |
|---------|---------|---------|--------|---------|---------|--------|
| 416015  | 1782397 | 2570804 | 371228 | 359180  | 111957  | 117100 |
| 29      | 30      | 31      | 32     | 33      | 34      | 35     |
| 29      | 30      | 1       | 2      | 3       | 4       | 5      |
| G_34    | G_8     | A_1     | A_13   | A_14    | A_15    | A_17   |
| UC      | UC      | CHR_NP  | CHR_NP | CHR_NP  | CHR_NP  | CHR_NP |
| 1225092 | 8081102 | 5806417 | 697662 | 2226184 | 4034201 | 718772 |
| 0.72    | 0.39    | 0.96    | 0.48   | 0.99    | 0.21    | 0.19   |
| G_34    | G_8     | A_1     | A_13   | A_14    | A_15    | A_17   |
| 809077  | 6298705 | 3235613 | 326434 | 1867004 | 3922244 | 601672 |
| 84942   | 490594  | 524718  | 147840 | 177482  | 52963   | 22366  |
| 77391   | 190767  | 57861   | 35930  | 51767   | 20495   | 29235  |
| 40120   | 56160   | 19787   | 12104  | 6580    | 1299    | 1849   |
| 36859   | 144853  | 154427  | 16001  | 12349   | 7379    | 5916   |
| 48028   | 62452   | 40902   | 9346   | 6914    | 1958    | 1959   |
| 6252    | 159965  | 429461  | 10799  | 6151    | 691     | 3614   |
| 25442   | 105646  | 129967  | 19819  | 6870    | 944     | 3558   |
| 877     | 48162   | 239532  | 1527   | 2921    | 163     | 2170   |
| 6027    | 77934   | 125922  | 6157   | 4266    | 404     | 1038   |
| 7638    | 64617   | 89917   | 13201  | 15998   | 3982    | 7085   |
| 4804    | 24819   | 40910   | 5579   | 5618    | 2306    | 2495   |
| 6898    | 26015   | 27652   | 3134   | 2436    | 1260    | 877    |
| 4774    | 22981   | 47820   | 4281   | 1757    | 431     | 1073   |
| 5644    | 19273   | 22471   | 1945   | 2684    | 2259    | 900    |
| 754     | 16947   | 76438   | 4985   | 2226    | 199     | 1781   |
| 1146    | 3916    | 7077    | 1264   | 411     | 112     | 52     |
| 1626    | 17363   | 32560   | 3018   | 1229    | 106     | 957    |
| 1789    | 7192    | 16561   | 2248   | 2621    | 714     | 1153   |
| 2298    | 19340   | 32924   | 3758   | 1850    | 237     | 1112   |
| 2965    | 10682   | 11662   | 9783   | 6100    | 1083    | 3458   |
| 1450    | 3881    | 5082    | 1383   | 1406    | 359     | 487    |
| 2096    | 10495   | 10374   | 1314   | 1891    | 915     | 526    |
| 1725    | 11779   | 12831   | 5620   | 2161    | 199     | 1136   |
| 2819    | 3401    | 16942   | 2400   | 1130    | 56      | 484    |
| 1591    | 6662    | 30968   | 6796   | 3573    | 117     | 4142   |
| 1149    | 5975    | 7914    | 2005   | 975     | 141     | 139    |
| 2192    | 5029    | 3956    | 507    | 587     | 585     | 135    |
| 420     | 17452   | 20362   | 1135   | 2743    | 554     | 1838   |
| 1155    | 5432    | 14099   | 1375   | 1018    | 338     | 583    |
| 2163    | 7464    | 4525    | 1634   | 1050    | 476     | 473    |
| 1365    | 7197    | 4668    | 1176   | 613     | 83      | 382    |
| 2076    | 6021    | 7107    | 426    | 233     | 167     | 165    |
| 796     | 7148    | 25687   | 977    | 302     | 45      | 211    |
| 307     | 2763    | 39709   | 1253   | 256     | 39      | 320    |
| 1062    | 4958    | 9505    | 925    | 696     | 218     | 398    |
| 1773    | 5418    | 3867    | 554    | 984     | 787     | 356    |
| 882     | 7719    | 10370   | 2739   | 2759    | 690     | 2208   |
| 1205    | 4931    | 11825   | 3837   | 2951    | 380     | 2482   |
| 1744    | 3394    | 3680    | 3049   | 1325    | 876     | 1032   |
| 997     | 1500    | 2655    | 501    | 118     | 65      | 149    |
| 448     | 875     | 1553    | 897    | 502     | 298     | 168    |
| 1375    | 1340    | 1182    | 342    | 209     | 55      | 107    |
| 780     | 2474    | 2973    | 610    | 584     | 464     | 188    |
| 123     | 5969    | 15267   | 521    | 702     | 99      | 874    |
| 1351    | 1744    | 2875    | 753    | 768     | 109     | 319    |



|      |      |       |      |      |     |     |
|------|------|-------|------|------|-----|-----|
| 672  | 2079 | 2339  | 738  | 377  | 94  | 183 |
| 1033 | 3511 | 4959  | 702  | 365  | 57  | 215 |
| 491  | 1780 | 1469  | 320  | 333  | 130 | 75  |
| 52   | 1090 | 16994 | 49   | 23   | 6   | 5   |
| 151  | 1755 | 8702  | 825  | 296  | 4   | 107 |
| 739  | 2748 | 1046  | 729  | 329  | 582 | 316 |
| 593  | 1203 | 1882  | 425  | 233  | 14  | 98  |
| 574  | 1525 | 951   | 283  | 357  | 204 | 128 |
| 175  | 1301 | 3760  | 1492 | 856  | 62  | 345 |
| 212  | 3705 | 2971  | 588  | 64   | 1   | 1   |
| 19   | 870  | 12278 | 90   | 41   | 4   | 26  |
| 488  | 1698 | 2601  | 272  | 171  | 55  | 78  |
| 405  | 1378 | 1454  | 160  | 92   | 6   | 26  |
| 690  | 766  | 1205  | 333  | 316  | 56  | 73  |
| 775  | 1354 | 724   | 416  | 324  | 226 | 110 |
| 529  | 1009 | 1246  | 183  | 110  | 40  | 66  |
| 296  | 895  | 966   | 257  | 174  | 16  | 88  |
| 38   | 2086 | 19396 | 149  | 96   | 10  | 123 |
| 23   | 397  | 13240 | 34   | 12   | 4   | 7   |
| 61   | 1002 | 688   | 146  | 319  | 563 | 95  |
| 236  | 1815 | 3256  | 192  | 176  | 63  | 79  |
| 185  | 1317 | 1778  | 88   | 33   | 4   | 39  |
| 107  | 2009 | 4922  | 91   | 48   | 19  | 86  |
| 206  | 370  | 890   | 114  | 113  | 11  | 44  |
| 124  | 2669 | 2210  | 262  | 1494 | 734 | 626 |
| 246  | 370  | 253   | 126  | 92   | 37  | 26  |
| 93   | 305  | 737   | 123  | 232  | 151 | 50  |
| 38   | 1552 | 6757  | 298  | 161  | 16  | 145 |
| 80   | 836  | 1240  | 206  | 314  | 36  | 50  |
| 334  | 596  | 1151  | 269  | 87   | 4   | 19  |
| 229  | 1033 | 629   | 195  | 83   | 62  | 75  |
| 181  | 1372 | 714   | 261  | 182  | 11  | 9   |
| 257  | 1310 | 364   | 191  | 208  | 288 | 149 |
| 311  | 451  | 322   | 63   | 58   | 19  | 13  |
| 250  | 283  | 255   | 78   | 40   | 21  | 11  |
| 108  | 631  | 1758  | 103  | 78   | 26  | 33  |
| 138  | 280  | 277   | 79   | 31   | 6   | 3   |
| 90   | 500  | 497   | 192  | 228  | 231 | 83  |
| 58   | 184  | 1045  | 124  | 33   | 4   | 21  |
| 226  | 1087 | 1734  | 183  | 116  | 21  | 129 |
| 103  | 377  | 318   | 27   | 21   | 4   | 5   |
| 135  | 291  | 282   | 99   | 130  | 95  | 29  |
| 43   | 849  | 3254  | 92   | 29   | 5   | 23  |
| 66   | 324  | 480   | 228  | 94   | 16  | 35  |
| 212  | 402  | 518   | 100  | 23   | 19  | 41  |
| 79   | 184  | 201   | 58   | 116  | 14  | 77  |
| 1    | 171  | 4097  | 1    | 3    | 2   | 0   |
| 81   | 155  | 313   | 78   | 21   | 1   | 8   |
| 68   | 786  | 703   | 28   | 24   | 2   | 9   |
| 24   | 333  | 1680  | 27   | 16   | 2   | 8   |
| 32   | 196  | 801   | 89   | 20   | 1   | 12  |
| 71   | 196  | 115   | 81   | 46   | 24  | 19  |
| 68   | 256  | 155   | 55   | 64   | 31  | 22  |
| 208  | 205  | 151   | 172  | 104  | 18  | 46  |
| 21   | 495  | 1066  | 22   | 15   | 3   | 7   |
| 77   | 250  | 225   | 41   | 60   | 11  | 19  |
| 83   | 371  | 266   | 50   | 19   | 4   | 18  |
| 183  | 123  | 200   | 83   | 18   | 4   | 5   |
| 91   | 577  | 1037  | 134  | 84   | 20  | 73  |

|     |     |      |     |    |    |    |
|-----|-----|------|-----|----|----|----|
| 25  | 560 | 2176 | 95  | 77 | 10 | 39 |
| 18  | 438 | 1580 | 47  | 44 | 7  | 37 |
| 115 | 83  | 110  | 48  | 27 | 8  | 17 |
| 139 | 251 | 184  | 113 | 50 | 18 | 29 |
| 39  | 301 | 1390 | 37  | 19 | 4  | 10 |
| 58  | 408 | 709  | 22  | 21 | 3  | 12 |
| 42  | 165 | 387  | 97  | 45 | 4  | 22 |
| 72  | 118 | 124  | 49  | 33 | 15 | 10 |
| 160 | 181 | 128  | 36  | 35 | 5  | 4  |
| 33  | 484 | 1041 | 40  | 53 | 19 | 40 |
| 126 | 69  | 212  | 31  | 8  | 1  | 3  |
| 71  | 169 | 308  | 37  | 16 | 11 | 9  |
| 41  | 215 | 908  | 32  | 20 | 10 | 22 |
| 31  | 209 | 577  | 63  | 13 | 3  | 17 |
| 31  | 209 | 577  | 63  | 13 | 3  | 17 |
| 97  | 171 | 197  | 29  | 28 | 5  | 9  |
| 52  | 102 | 133  | 15  | 10 | 1  | 3  |
| 28  | 48  | 101  | 36  | 32 | 6  | 8  |
| 44  | 664 | 466  | 56  | 27 | 4  | 10 |
| 16  | 144 | 278  | 68  | 53 | 4  | 26 |
| 15  | 111 | 976  | 5   | 1  | 0  | 0  |
| 22  | 98  | 114  | 32  | 8  | 6  | 5  |
| 106 | 99  | 122  | 29  | 19 | 3  | 6  |
| 29  | 126 | 108  | 16  | 15 | 3  | 4  |
| 21  | 71  | 99   | 40  | 46 | 33 | 31 |
| 42  | 123 | 70   | 18  | 6  | 1  | 2  |
| 7   | 334 | 83   | 19  | 20 | 13 | 1  |
| 32  | 148 | 81   | 47  | 10 | 1  | 8  |
| 40  | 245 | 382  | 44  | 21 | 2  | 14 |
| 26  | 32  | 78   | 15  | 9  | 7  | 5  |
| 14  | 154 | 604  | 45  | 7  | 0  | 2  |
| 53  | 105 | 93   | 15  | 17 | 3  | 7  |
| 18  | 133 | 114  | 6   | 6  | 1  | 3  |
| 21  | 122 | 247  | 10  | 12 | 3  | 4  |
| 18  | 126 | 289  | 15  | 5  | 1  | 4  |
| 33  | 76  | 52   | 9   | 4  | 0  | 3  |
| 25  | 126 | 166  | 34  | 13 | 2  | 2  |
| 10  | 61  | 51   | 6   | 11 | 8  | 1  |
| 24  | 80  | 39   | 5   | 3  | 1  | 0  |
| 47  | 90  | 193  | 48  | 18 | 3  | 4  |
| 13  | 68  | 632  | 1   | 1  | 0  | 0  |
| 10  | 93  | 55   | 4   | 7  | 10 | 5  |
| 19  | 31  | 44   | 23  | 10 | 4  | 2  |
| 17  | 74  | 131  | 30  | 13 | 2  | 3  |
| 17  | 102 | 76   | 23  | 20 | 13 | 4  |
| 31  | 71  | 68   | 12  | 15 | 6  | 3  |
| 14  | 34  | 105  | 35  | 8  | 1  | 3  |
| 14  | 155 | 207  | 9   | 12 | 4  | 5  |
| 8   | 220 | 314  | 22  | 3  | 0  | 5  |
| 21  | 43  | 59   | 18  | 13 | 2  | 1  |
| 9   | 8   | 27   | 0   | 0  | 0  | 0  |
| 21  | 59  | 57   | 6   | 35 | 46 | 4  |
| 46  | 119 | 72   | 20  | 31 | 55 | 23 |
| 28  | 20  | 29   | 5   | 7  | 10 | 2  |
| 28  | 28  | 43   | 11  | 3  | 1  | 1  |
| 4   | 76  | 166  | 5   | 7  | 1  | 1  |
| 2   | 37  | 646  | 6   | 1  | 1  | 2  |
| 34  | 31  | 22   | 7   | 6  | 0  | 0  |
| 12  | 79  | 11   | 7   | 7  | 8  | 4  |

|    |     |     |    |    |    |    |
|----|-----|-----|----|----|----|----|
| 17 | 71  | 217 | 21 | 8  | 1  | 5  |
| 31 | 51  | 79  | 20 | 8  | 0  | 5  |
| 14 | 54  | 63  | 9  | 8  | 2  | 4  |
| 31 | 35  | 30  | 11 | 16 | 2  | 7  |
| 6  | 13  | 26  | 9  | 5  | 3  | 2  |
| 8  | 67  | 337 | 10 | 2  | 0  | 1  |
| 4  | 65  | 109 | 9  | 13 | 9  | 2  |
| 14 | 16  | 20  | 3  | 1  | 0  | 1  |
| 10 | 92  | 173 | 13 | 8  | 1  | 4  |
| 24 | 60  | 44  | 22 | 21 | 4  | 13 |
| 16 | 48  | 31  | 17 | 7  | 1  | 2  |
| 8  | 71  | 268 | 42 | 6  | 0  | 2  |
| 15 | 45  | 25  | 6  | 7  | 3  | 0  |
| 11 | 48  | 35  | 15 | 9  | 19 | 0  |
| 14 | 60  | 99  | 17 | 9  | 0  | 3  |
| 10 | 16  | 35  | 3  | 16 | 1  | 4  |
| 31 | 47  | 24  | 6  | 0  | 1  | 2  |
| 17 | 102 | 62  | 6  | 3  | 5  | 0  |
| 6  | 103 | 217 | 9  | 7  | 1  | 4  |
| 17 | 52  | 24  | 20 | 9  | 14 | 4  |
| 6  | 88  | 141 | 16 | 6  | 1  | 9  |
| 10 | 32  | 27  | 12 | 20 | 22 | 1  |
| 16 | 30  | 37  | 5  | 3  | 2  | 2  |
| 6  | 95  | 201 | 9  | 7  | 1  | 4  |
| 10 | 36  | 36  | 11 | 14 | 12 | 10 |
| 30 | 43  | 35  | 3  | 1  | 3  | 1  |
| 16 | 73  | 42  | 13 | 3  | 1  | 2  |
| 85 | 59  | 17  | 13 | 0  | 0  | 0  |
| 3  | 103 | 90  | 8  | 5  | 0  | 10 |
| 13 | 36  | 72  | 6  | 7  | 5  | 1  |
| 8  | 29  | 16  | 23 | 7  | 14 | 6  |
| 6  | 103 | 46  | 14 | 21 | 11 | 4  |
| 34 | 41  | 70  | 17 | 1  | 4  | 3  |
| 1  | 28  | 199 | 30 | 1  | 0  | 0  |
| 6  | 73  | 60  | 3  | 9  | 10 | 2  |
| 7  | 28  | 24  | 4  | 6  | 3  | 1  |
| 6  | 63  | 140 | 5  | 8  | 1  | 5  |
| 16 | 49  | 33  | 12 | 4  | 0  | 2  |
| 9  | 35  | 24  | 34 | 28 | 0  | 10 |
| 17 | 43  | 25  | 9  | 4  | 0  | 1  |
| 7  | 41  | 16  | 7  | 10 | 3  | 4  |
| 6  | 80  | 194 | 5  | 7  | 2  | 5  |
| 6  | 67  | 36  | 7  | 1  | 2  | 0  |
| 10 | 41  | 36  | 3  | 5  | 4  | 1  |
| 17 | 47  | 17  | 8  | 2  | 0  | 2  |
| 32 | 54  | 141 | 4  | 5  | 3  | 0  |
| 12 | 44  | 48  | 0  | 2  | 1  | 1  |
| 11 | 10  | 30  | 13 | 7  | 1  | 3  |
| 9  | 23  | 16  | 15 | 13 | 0  | 3  |
| 2  | 131 | 221 | 24 | 8  | 1  | 8  |
| 11 | 41  | 12  | 2  | 2  | 1  | 0  |
| 2  | 70  | 31  | 2  | 0  | 0  | 0  |
| 7  | 40  | 48  | 10 | 1  | 0  | 2  |
| 12 | 49  | 53  | 12 | 6  | 0  | 1  |
| 5  | 39  | 44  | 2  | 1  | 0  | 0  |
| 0  | 14  | 288 | 0  | 2  | 0  | 0  |
| 11 | 52  | 53  | 5  | 6  | 1  | 1  |
| 6  | 56  | 84  | 18 | 2  | 1  | 1  |
| 9  | 36  | 26  | 4  | 5  | 0  | 0  |

|    |     |     |    |    |   |   |
|----|-----|-----|----|----|---|---|
| 8  | 14  | 54  | 7  | 4  | 0 | 6 |
| 11 | 12  | 20  | 2  | 4  | 2 | 1 |
| 7  | 104 | 50  | 18 | 3  | 0 | 1 |
| 14 | 8   | 8   | 3  | 0  | 0 | 0 |
| 11 | 18  | 19  | 3  | 0  | 0 | 0 |
| 5  | 16  | 27  | 0  | 1  | 0 | 0 |
| 5  | 14  | 22  | 4  | 1  | 6 | 0 |
| 6  | 8   | 40  | 7  | 7  | 1 | 2 |
| 8  | 26  | 171 | 6  | 2  | 1 | 6 |
| 4  | 24  | 14  | 7  | 8  | 5 | 8 |
| 0  | 22  | 223 | 1  | 0  | 0 | 0 |
| 4  | 16  | 21  | 2  | 4  | 1 | 0 |
| 1  | 31  | 72  | 2  | 0  | 0 | 0 |
| 5  | 29  | 22  | 0  | 9  | 1 | 3 |
| 5  | 12  | 16  | 4  | 2  | 0 | 0 |
| 8  | 17  | 41  | 8  | 1  | 0 | 1 |
| 5  | 38  | 86  | 14 | 2  | 0 | 2 |
| 5  | 19  | 16  | 2  | 3  | 0 | 0 |
| 2  | 29  | 17  | 5  | 3  | 1 | 1 |
| 4  | 10  | 19  | 2  | 1  | 0 | 0 |
| 4  | 21  | 92  | 14 | 3  | 0 | 2 |
| 4  | 22  | 31  | 11 | 9  | 0 | 2 |
| 4  | 22  | 31  | 11 | 9  | 0 | 2 |
| 4  | 12  | 10  | 1  | 0  | 4 | 2 |
| 1  | 8   | 11  | 3  | 0  | 1 | 1 |
| 8  | 30  | 27  | 0  | 1  | 2 | 0 |
| 9  | 30  | 21  | 2  | 0  | 1 | 0 |
| 7  | 12  | 15  | 5  | 3  | 0 | 2 |
| 6  | 15  | 17  | 3  | 0  | 0 | 2 |
| 3  | 4   | 17  | 5  | 6  | 3 | 6 |
| 4  | 22  | 33  | 1  | 2  | 0 | 1 |
| 8  | 9   | 15  | 11 | 2  | 0 | 0 |
| 4  | 12  | 29  | 12 | 1  | 0 | 2 |
| 31 | 4   | 7   | 11 | 2  | 0 | 0 |
| 4  | 11  | 22  | 0  | 0  | 0 | 0 |
| 4  | 6   | 24  | 3  | 5  | 1 | 1 |
| 0  | 9   | 149 | 0  | 0  | 0 | 0 |
| 7  | 12  | 13  | 3  | 3  | 1 | 0 |
| 3  | 29  | 47  | 16 | 3  | 0 | 1 |
| 8  | 7   | 9   | 1  | 1  | 0 | 0 |
| 1  | 19  | 13  | 1  | 2  | 4 | 0 |
| 3  | 22  | 42  | 15 | 3  | 0 | 1 |
| 6  | 11  | 12  | 2  | 1  | 1 | 1 |
| 2  | 22  | 9   | 3  | 0  | 0 | 0 |
| 2  | 34  | 31  | 0  | 4  | 1 | 1 |
| 6  | 15  | 6   | 2  | 0  | 1 | 0 |
| 0  | 4   | 113 | 0  | 1  | 0 | 0 |
| 6  | 8   | 14  | 3  | 0  | 0 | 0 |
| 2  | 6   | 9   | 1  | 1  | 0 | 0 |
| 1  | 3   | 27  | 2  | 0  | 1 | 1 |
| 2  | 10  | 11  | 0  | 0  | 0 | 0 |
| 4  | 30  | 13  | 4  | 2  | 0 | 0 |
| 0  | 9   | 39  | 0  | 0  | 0 | 0 |
| 15 | 14  | 17  | 5  | 4  | 1 | 2 |
| 1  | 9   | 14  | 2  | 2  | 0 | 2 |
| 0  | 0   | 3   | 4  | 72 | 0 | 0 |
| 3  | 15  | 13  | 2  | 0  | 1 | 1 |
| 0  | 8   | 13  | 9  | 1  | 3 | 2 |
| 6  | 12  | 11  | 4  | 4  | 4 | 2 |

|    |    |    |   |   |   |   |
|----|----|----|---|---|---|---|
| 10 | 16 | 9  | 3 | 0 | 3 | 0 |
| 4  | 10 | 3  | 2 | 1 | 1 | 0 |
| 4  | 24 | 18 | 3 | 3 | 1 | 2 |
| 1  | 15 | 8  | 5 | 0 | 0 | 2 |
| 2  | 4  | 8  | 4 | 2 | 1 | 2 |
| 7  | 10 | 11 | 4 | 3 | 0 | 0 |
| 0  | 8  | 11 | 2 | 1 | 0 | 2 |
| 6  | 10 | 9  | 2 | 0 | 0 | 0 |
| 0  | 78 | 58 | 0 | 2 | 0 | 1 |
| 0  | 10 | 72 | 4 | 0 | 0 | 0 |
| 3  | 28 | 20 | 4 | 5 | 0 | 3 |
| 5  | 10 | 5  | 0 | 1 | 0 | 1 |
| 3  | 19 | 31 | 2 | 2 | 2 | 1 |
| 7  | 1  | 3  | 0 | 0 | 0 | 0 |
| 5  | 5  | 12 | 2 | 1 | 0 | 0 |
| 2  | 3  | 39 | 7 | 0 | 0 | 2 |
| 4  | 19 | 20 | 2 | 0 | 6 | 3 |
| 7  | 10 | 12 | 2 | 1 | 0 | 1 |
| 1  | 4  | 11 | 2 | 0 | 1 | 1 |
| 1  | 36 | 15 | 2 | 0 | 0 | 0 |
| 2  | 8  | 5  | 0 | 3 | 0 | 0 |
| 4  | 2  | 15 | 3 | 0 | 1 | 1 |
| 3  | 3  | 0  | 1 | 0 | 0 | 0 |
| 4  | 13 | 4  | 1 | 0 | 5 | 0 |
| 1  | 7  | 13 | 5 | 3 | 0 | 0 |
| 4  | 2  | 3  | 0 | 0 | 0 | 0 |
| 1  | 2  | 2  | 2 | 0 | 0 | 0 |
| 2  | 3  | 7  | 1 | 1 | 0 | 0 |
| 6  | 5  | 5  | 4 | 2 | 0 | 0 |
| 8  | 7  | 10 | 2 | 0 | 0 | 0 |
| 4  | 8  | 3  | 0 | 1 | 2 | 0 |
| 1  | 14 | 52 | 4 | 3 | 0 | 3 |
| 0  | 20 | 56 | 2 | 2 | 0 | 0 |
| 1  | 19 | 7  | 2 | 0 | 0 | 0 |
| 3  | 19 | 26 | 3 | 2 | 3 | 1 |
| 1  | 5  | 4  | 0 | 2 | 4 | 0 |
| 4  | 7  | 1  | 2 | 1 | 1 | 0 |
| 1  | 2  | 5  | 2 | 1 | 0 | 1 |
| 0  | 2  | 0  | 2 | 0 | 0 | 1 |
| 1  | 3  | 11 | 1 | 1 | 0 | 0 |
| 2  | 5  | 71 | 0 | 1 | 0 | 1 |
| 3  | 3  | 3  | 0 | 2 | 1 | 0 |
| 2  | 13 | 5  | 0 | 0 | 0 | 0 |
| 1  | 4  | 6  | 1 | 3 | 1 | 0 |
| 2  | 13 | 13 | 3 | 2 | 0 | 4 |
| 0  | 1  | 0  | 0 | 0 | 0 | 0 |
| 1  | 5  | 8  | 1 | 0 | 2 | 0 |
| 1  | 2  | 14 | 3 | 0 | 0 | 0 |
| 2  | 4  | 4  | 0 | 0 | 2 | 0 |
| 2  | 7  | 6  | 1 | 0 | 0 | 0 |
| 0  | 13 | 4  | 3 | 0 | 0 | 0 |
| 1  | 5  | 33 | 0 | 0 | 0 | 1 |
| 1  | 3  | 2  | 2 | 2 | 1 | 0 |
| 0  | 14 | 28 | 6 | 2 | 0 | 1 |
| 1  | 8  | 5  | 0 | 1 | 0 | 0 |
| 1  | 1  | 0  | 0 | 1 | 0 | 0 |
| 0  | 2  | 4  | 3 | 0 | 2 | 0 |
| 0  | 22 | 4  | 1 | 0 | 0 | 0 |
| 2  | 9  | 1  | 3 | 4 | 0 | 0 |

|   |    |    |   |   |   |   |
|---|----|----|---|---|---|---|
| 2 | 5  | 11 | 2 | 6 | 1 | 1 |
| 1 | 2  | 2  | 0 | 0 | 0 | 0 |
| 0 | 2  | 1  | 1 | 0 | 0 | 0 |
| 1 | 1  | 6  | 1 | 2 | 0 | 0 |
| 2 | 5  | 0  | 3 | 2 | 2 | 1 |
| 4 | 5  | 3  | 1 | 1 | 0 | 0 |
| 2 | 7  | 2  | 0 | 0 | 0 | 0 |
| 1 | 23 | 61 | 2 | 0 | 1 | 4 |
| 0 | 9  | 8  | 2 | 0 | 0 | 0 |
| 0 | 3  | 3  | 3 | 1 | 0 | 0 |
| 2 | 3  | 5  | 2 | 0 | 0 | 0 |
| 2 | 5  | 5  | 1 | 0 | 0 | 0 |
| 1 | 0  | 9  | 3 | 0 | 1 | 2 |
| 1 | 10 | 23 | 0 | 0 | 0 | 2 |
| 1 | 0  | 7  | 0 | 1 | 1 | 0 |
| 2 | 9  | 11 | 2 | 0 | 0 | 0 |
| 3 | 5  | 13 | 1 | 1 | 0 | 0 |
| 0 | 5  | 5  | 1 | 1 | 0 | 1 |
| 2 | 8  | 26 | 1 | 0 | 0 | 1 |
| 1 | 8  | 7  | 2 | 0 | 1 | 0 |
| 1 | 1  | 8  | 1 | 2 | 0 | 0 |
| 1 | 2  | 8  | 4 | 2 | 0 | 0 |
| 4 | 3  | 5  | 1 | 0 | 0 | 0 |
| 1 | 2  | 1  | 2 | 2 | 0 | 1 |
| 0 | 8  | 10 | 0 | 1 | 3 | 1 |
| 5 | 1  | 2  | 2 | 0 | 1 | 1 |
| 0 | 4  | 23 | 2 | 0 | 0 | 0 |
| 1 | 4  | 12 | 1 | 0 | 0 | 0 |
| 3 | 2  | 0  | 1 | 0 | 0 | 0 |
| 0 | 0  | 2  | 0 | 0 | 0 | 0 |
| 0 | 4  | 2  | 8 | 1 | 0 | 1 |
| 2 | 3  | 4  | 1 | 0 | 0 | 0 |
| 1 | 1  | 8  | 0 | 1 | 1 | 0 |
| 0 | 1  | 2  | 3 | 1 | 0 | 0 |
| 0 | 6  | 14 | 0 | 0 | 0 | 0 |
| 1 | 6  | 3  | 0 | 0 | 1 | 1 |
| 0 | 4  | 1  | 4 | 0 | 0 | 1 |
| 0 | 1  | 5  | 0 | 0 | 0 | 0 |
| 2 | 1  | 3  | 1 | 0 | 0 | 0 |
| 1 | 1  | 4  | 4 | 0 | 0 | 0 |
| 2 | 1  | 2  | 5 | 0 | 0 | 2 |
| 1 | 1  | 3  | 1 | 0 | 0 | 0 |
| 2 | 4  | 6  | 4 | 2 | 0 | 0 |
| 0 | 2  | 8  | 1 | 0 | 0 | 0 |
| 4 | 3  | 1  | 0 | 1 | 0 | 0 |
| 5 | 7  | 4  | 0 | 0 | 0 | 0 |
| 1 | 1  | 2  | 0 | 0 | 0 | 0 |
| 0 | 3  | 1  | 2 | 2 | 0 | 0 |
| 0 | 6  | 5  | 0 | 0 | 0 | 0 |
| 0 | 0  | 0  | 0 | 1 | 0 | 0 |
| 2 | 2  | 5  | 1 | 0 | 0 | 0 |
| 1 | 5  | 8  | 4 | 0 | 0 | 0 |
| 0 | 6  | 9  | 0 | 0 | 0 | 0 |
| 1 | 1  | 2  | 1 | 2 | 0 | 3 |
| 1 | 2  | 5  | 0 | 1 | 0 | 0 |
| 0 | 13 | 10 | 1 | 5 | 1 | 9 |
| 0 | 0  | 2  | 1 | 0 | 0 | 0 |
| 1 | 4  | 4  | 0 | 0 | 0 | 0 |
| 2 | 0  | 2  | 0 | 0 | 0 | 0 |

|   |   |    |   |   |   |   |
|---|---|----|---|---|---|---|
| 0 | 4 | 5  | 0 | 0 | 0 | 0 |
| 0 | 0 | 2  | 0 | 0 | 0 | 0 |
| 0 | 0 | 6  | 1 | 2 | 0 | 0 |
| 1 | 0 | 12 | 0 | 0 | 0 | 0 |
| 3 | 4 | 4  | 0 | 1 | 0 | 0 |
| 0 | 2 | 2  | 0 | 0 | 1 | 1 |
| 0 | 0 | 0  | 0 | 0 | 0 | 0 |
| 1 | 3 | 13 | 2 | 0 | 0 | 0 |
| 1 | 2 | 0  | 0 | 3 | 1 | 0 |
| 1 | 3 | 3  | 0 | 0 | 0 | 0 |
| 0 | 0 | 24 | 1 | 0 | 0 | 1 |
| 0 | 1 | 18 | 0 | 0 | 0 | 0 |
| 0 | 1 | 17 | 0 | 0 | 0 | 0 |
| 0 | 8 | 2  | 1 | 0 | 0 | 0 |
| 0 | 4 | 2  | 1 | 2 | 0 | 0 |
| 1 | 1 | 0  | 1 | 0 | 0 | 0 |
| 0 | 1 | 3  | 1 | 0 | 0 | 0 |
| 1 | 4 | 2  | 0 | 0 | 0 | 0 |
| 0 | 2 | 40 | 0 | 0 | 0 | 0 |
| 0 | 3 | 6  | 0 | 0 | 0 | 1 |
| 0 | 2 | 4  | 1 | 0 | 0 | 1 |
| 0 | 1 | 18 | 1 | 0 | 0 | 0 |
| 1 | 5 | 3  | 0 | 0 | 0 | 0 |
| 0 | 0 | 0  | 0 | 0 | 0 | 0 |
| 0 | 3 | 1  | 0 | 0 | 0 | 0 |
| 0 | 2 | 10 | 0 | 0 | 0 | 0 |
| 0 | 0 | 10 | 0 | 0 | 0 | 0 |
| 0 | 1 | 2  | 0 | 0 | 0 | 0 |
| 0 | 0 | 1  | 0 | 0 | 0 | 0 |
| 0 | 1 | 4  | 1 | 1 | 0 | 0 |
| 0 | 1 | 18 | 0 | 0 | 0 | 0 |
| 0 | 6 | 4  | 0 | 1 | 0 | 0 |
| 1 | 2 | 1  | 0 | 1 | 0 | 0 |
| 0 | 1 | 2  | 0 | 0 | 0 | 0 |
| 2 | 0 | 8  | 2 | 0 | 0 | 1 |
| 1 | 1 | 0  | 1 | 1 | 0 | 1 |
| 0 | 0 | 4  | 0 | 1 | 0 | 0 |
| 0 | 4 | 3  | 1 | 0 | 0 | 0 |
| 1 | 3 | 8  | 0 | 0 | 0 | 0 |
| 0 | 4 | 4  | 1 | 1 | 0 | 0 |
| 0 | 8 | 41 | 0 | 0 | 0 | 0 |
| 3 | 1 | 3  | 0 | 0 | 0 | 0 |
| 2 | 2 | 0  | 0 | 1 | 0 | 0 |
| 0 | 3 | 3  | 0 | 0 | 0 | 0 |
| 0 | 1 | 0  | 0 | 0 | 0 | 0 |
| 0 | 5 | 8  | 0 | 0 | 0 | 0 |
| 0 | 9 | 11 | 0 | 0 | 0 | 0 |
| 1 | 2 | 0  | 0 | 2 | 0 | 0 |
| 0 | 2 | 0  | 0 | 0 | 0 | 0 |
| 0 | 1 | 2  | 0 | 1 | 0 | 0 |
| 1 | 4 | 4  | 1 | 2 | 0 | 0 |
| 0 | 3 | 7  | 0 | 0 | 0 | 1 |
| 1 | 5 | 2  | 0 | 0 | 0 | 0 |
| 0 | 1 | 6  | 2 | 0 | 0 | 0 |
| 0 | 2 | 2  | 0 | 0 | 0 | 0 |
| 0 | 1 | 2  | 3 | 0 | 0 | 0 |
| 2 | 4 | 2  | 0 | 0 | 0 | 0 |
| 1 | 4 | 0  | 0 | 0 | 0 | 0 |
| 1 | 5 | 0  | 0 | 0 | 0 | 0 |

|   |    |    |   |   |   |   |
|---|----|----|---|---|---|---|
| 0 | 0  | 1  | 0 | 0 | 0 | 0 |
| 1 | 1  | 1  | 0 | 0 | 0 | 0 |
| 0 | 1  | 2  | 3 | 1 | 0 | 0 |
| 0 | 0  | 1  | 0 | 1 | 0 | 0 |
| 0 | 7  | 2  | 0 | 0 | 0 | 0 |
| 0 | 2  | 6  | 0 | 0 | 0 | 0 |
| 0 | 0  | 2  | 0 | 0 | 0 | 0 |
| 0 | 2  | 17 | 1 | 0 | 0 | 0 |
| 1 | 0  | 1  | 0 | 0 | 0 | 1 |
| 0 | 1  | 8  | 0 | 0 | 0 | 1 |
| 0 | 0  | 6  | 1 | 0 | 0 | 0 |
| 0 | 8  | 2  | 0 | 0 | 0 | 0 |
| 0 | 3  | 3  | 0 | 0 | 0 | 0 |
| 0 | 0  | 3  | 1 | 0 | 0 | 0 |
| 0 | 4  | 7  | 0 | 0 | 0 | 0 |
| 0 | 1  | 3  | 0 | 0 | 1 | 0 |
| 1 | 0  | 0  | 2 | 0 | 0 | 0 |
| 0 | 10 | 2  | 0 | 1 | 0 | 0 |
| 0 | 2  | 12 | 1 | 1 | 0 | 0 |
| 1 | 0  | 0  | 0 | 1 | 0 | 0 |
| 0 | 0  | 1  | 0 | 0 | 0 | 0 |
| 0 | 2  | 13 | 1 | 0 | 0 | 0 |
| 0 | 3  | 14 | 0 | 0 | 0 | 1 |
| 1 | 0  | 0  | 0 | 0 | 0 | 0 |
| 1 | 0  | 0  | 1 | 0 | 0 | 0 |
| 0 | 2  | 2  | 0 | 0 | 0 | 0 |
| 1 | 0  | 0  | 0 | 1 | 0 | 0 |
| 0 | 1  | 1  | 0 | 0 | 0 | 0 |
| 0 | 3  | 12 | 0 | 0 | 0 | 0 |
| 1 | 0  | 10 | 0 | 1 | 0 | 0 |
| 0 | 3  | 6  | 0 | 0 | 0 | 0 |
| 0 | 1  | 1  | 0 | 0 | 0 | 0 |
| 0 | 3  | 3  | 1 | 0 | 0 | 0 |
| 1 | 0  | 0  | 1 | 0 | 0 | 0 |
| 0 | 2  | 0  | 0 | 0 | 0 | 0 |
| 0 | 2  | 3  | 1 | 0 | 0 | 0 |
| 0 | 1  | 2  | 0 | 0 | 0 | 0 |
| 0 | 1  | 4  | 0 | 0 | 0 | 1 |
| 0 | 3  | 0  | 1 | 0 | 0 | 0 |
| 1 | 1  | 1  | 0 | 0 | 0 | 1 |
| 0 | 3  | 5  | 0 | 0 | 1 | 0 |
| 0 | 3  | 0  | 0 | 0 | 0 | 0 |
| 0 | 0  | 1  | 1 | 0 | 0 | 0 |
| 1 | 3  | 0  | 2 | 0 | 0 | 0 |
| 1 | 0  | 0  | 0 | 0 | 0 | 1 |
| 0 | 1  | 2  | 0 | 1 | 0 | 0 |
| 1 | 2  | 1  | 0 | 0 | 0 | 2 |
| 0 | 3  | 1  | 0 | 1 | 0 | 0 |
| 1 | 2  | 1  | 0 | 0 | 1 | 0 |
| 0 | 2  | 0  | 0 | 0 | 0 | 0 |
| 0 | 0  | 1  | 0 | 1 | 0 | 0 |
| 0 | 1  | 11 | 0 | 0 | 0 | 0 |
| 0 | 0  | 2  | 0 | 0 | 0 | 0 |
| 0 | 0  | 9  | 1 | 0 | 0 | 0 |
| 0 | 2  | 1  | 1 | 0 | 0 | 0 |
| 1 | 0  | 2  | 1 | 0 | 0 | 0 |
| 0 | 1  | 1  | 1 | 0 | 0 | 0 |
| 0 | 0  | 0  | 0 | 0 | 0 | 0 |
| 0 | 0  | 5  | 0 | 0 | 0 | 0 |



|        |         |         |        |         |         |        |
|--------|---------|---------|--------|---------|---------|--------|
| 0      | 0       | 2       | 0      | 0       | 0       | 0      |
| 0      | 0       | 2       | 0      | 0       | 2       | 0      |
| 0      | 0       | 1       | 0      | 1       | 0       | 0      |
| 0      | 4       | 4       | 0      | 0       | 0       | 0      |
| 0      | 0       | 1       | 0      | 0       | 0       | 0      |
| 0      | 0       | 3       | 0      | 0       | 0       | 0      |
| 1      | 2       | 1       | 0      | 0       | 0       | 0      |
| 1      | 0       | 0       | 0      | 0       | 1       | 0      |
| 0      | 1       | 0       | 0      | 0       | 0       | 0      |
| 0      | 1       | 0       | 0      | 1       | 0       | 0      |
| 1      | 2       | 0       | 0      | 0       | 0       | 0      |
| 0      | 3       | 4       | 1      | 0       | 0       | 0      |
| 0      | 0       | 0       | 0      | 0       | 1       | 1      |
| G_34   | G_8     | A_1     | A_13   | A_14    | A_15    | A_17   |
| UC     | UC      | CHR_NP  | CHR_NP | CHR_NP  | CHR_NP  | CHR_NP |
| 809077 | 6298705 | 3235613 | 326434 | 1867004 | 3922244 | 601672 |
| 21     | 25      | 18      | 15     | 26      | 30      | 26     |
| -0.07  | 0.68    | -0.65   | -1.28  | 1.04    | 1.86    | 1.08   |

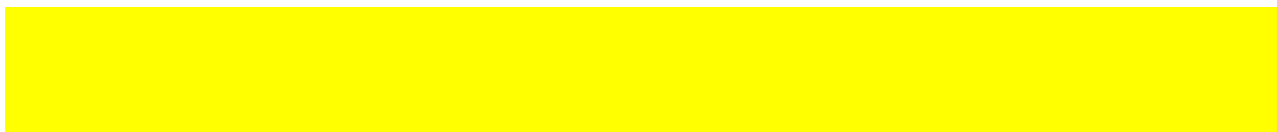

|        |        |        |        |        |         |        |
|--------|--------|--------|--------|--------|---------|--------|
| 0.15   | 0.02   | 0.31   | 0.94   | 0.02   | 0.54    | 0.27   |
| 25     | 38     | 22     | 5      | 36     | 18      | 24     |
| 1      | 1      | 1      | 1      | 1      | 1       | 1      |
| 29     | 30     | 31     | 32     | 33     | 34      | 35     |
| 2      | 3      | 4      | 5      | 6      | 7       | 8      |
| A_13   | A_14   | A_15   | A_17   | B_30   | B_33    | C_2    |
| CHR_NP | CHR_NP | CHR_NP | CHR_NP | CHR_NP | CHR_NP  | CHR_NP |
| 371228 | 359180 | 111957 | 117100 | 148505 | 1922117 | 685397 |
| A_13   | A_14   | A_15   | A_17   | B_30   | B_33    | C_2    |
| 147840 | 177482 | 52963  | 22366  | 4948   | 1007604 | 324840 |
| 35930  | 51767  | 20495  | 29235  | 27066  | 82363   | 53864  |
| 12104  | 6580   | 1299   | 1849   | 6598   | 53526   | 26948  |
| 16001  | 12349  | 7379   | 5916   | 19460  | 105395  | 30924  |
| 9346   | 6914   | 1958   | 1959   | 4335   | 185758  | 52795  |
| 10799  | 6151   | 691    | 3614   | 21454  | 22114   | 14962  |
| 19819  | 6870   | 944    | 3558   | 15329  | 42853   | 11026  |
| 1527   | 2921   | 163    | 2170   | 2182   | 4727    | 8808   |
| 6157   | 4266   | 404    | 1038   | 731    | 14989   | 4841   |
| 13201  | 15998  | 3982   | 7085   | 3504   | 41754   | 23520  |
| 5579   | 5618   | 2306   | 2495   | 1040   | 18898   | 8215   |
| 3134   | 2436   | 1260   | 877    | 1737   | 26780   | 9268   |
| 4281   | 1757   | 431    | 1073   | 2414   | 9346    | 2814   |
| 1945   | 2684   | 2259   | 900    | 1939   | 29210   | 14032  |
| 4985   | 2226   | 199    | 1781   | 2405   | 3647    | 1546   |
| 1264   | 411    | 112    | 52     | 145    | 33307   | 3175   |
| 3018   | 1229   | 106    | 957    | 2972   | 4989    | 1148   |
| 2248   | 2621   | 714    | 1153   | 1417   | 8203    | 5081   |
| 3758   | 1850   | 237    | 1112   | 933    | 6588    | 2949   |

|      |      |      |      |      |       |      |
|------|------|------|------|------|-------|------|
| 9783 | 6100 | 1083 | 3458 | 438  | 14685 | 3594 |
| 1383 | 1406 | 359  | 487  | 623  | 10198 | 3542 |
| 1314 | 1891 | 915  | 526  | 355  | 9348  | 4198 |
| 5620 | 2161 | 199  | 1136 | 195  | 8208  | 1746 |
| 2400 | 1130 | 56   | 484  | 2483 | 9903  | 3570 |
| 6796 | 3573 | 117  | 4142 | 618  | 960   | 351  |
| 2005 | 975  | 141  | 139  | 78   | 8786  | 2119 |
| 507  | 587  | 585  | 135  | 387  | 7245  | 2471 |
| 1135 | 2743 | 554  | 1838 | 209  | 3111  | 2406 |
| 1375 | 1018 | 338  | 583  | 1384 | 1840  | 832  |
| 1634 | 1050 | 476  | 473  | 118  | 5546  | 1298 |
| 1176 | 613  | 83   | 382  | 712  | 6198  | 2874 |
| 426  | 233  | 167  | 165  | 698  | 5805  | 1680 |
| 977  | 302  | 45   | 211  | 323  | 2251  | 767  |
| 1253 | 256  | 39   | 320  | 235  | 3245  | 1664 |
| 925  | 696  | 218  | 398  | 1268 | 1654  | 759  |
| 554  | 984  | 787  | 356  | 3972 | 9791  | 8590 |
| 2739 | 2759 | 690  | 2208 | 1051 | 2501  | 1914 |
| 3837 | 2951 | 380  | 2482 | 858  | 1145  | 524  |
| 3049 | 1325 | 876  | 1032 | 764  | 7023  | 2647 |
| 501  | 118  | 65   | 149  | 126  | 5223  | 653  |
| 897  | 502  | 298  | 168  | 602  | 13459 | 3447 |
| 342  | 209  | 55   | 107  | 64   | 2501  | 1026 |
| 610  | 584  | 464  | 188  | 608  | 5028  | 1644 |
| 521  | 702  | 99   | 874  | 608  | 572   | 534  |
| 753  | 768  | 109  | 319  | 314  | 1352  | 1203 |
| 738  | 377  | 94   | 183  | 93   | 3818  | 1085 |
| 702  | 365  | 57   | 215  | 134  | 1371  | 356  |
| 320  | 333  | 130  | 75   | 71   | 4788  | 1628 |
| 49   | 23   | 6    | 5    | 35   | 117   | 59   |
| 825  | 296  | 4    | 107  | 32   | 4093  | 805  |
| 729  | 329  | 582  | 316  | 129  | 1251  | 597  |
| 425  | 233  | 14   | 98   | 829  | 1597  | 1573 |
| 283  | 357  | 204  | 128  | 186  | 2136  | 1799 |
| 1492 | 856  | 62   | 345  | 89   | 2497  | 468  |
| 588  | 64   | 1    | 1    | 3    | 2771  | 336  |
| 90   | 41   | 4    | 26   | 5    | 119   | 63   |
| 272  | 171  | 55   | 78   | 374  | 1787  | 972  |
| 160  | 92   | 6    | 26   | 128  | 3593  | 697  |
| 333  | 316  | 56   | 73   | 77   | 1228  | 427  |
| 416  | 324  | 226  | 110  | 1831 | 389   | 166  |
| 183  | 110  | 40   | 66   | 177  | 1864  | 741  |
| 257  | 174  | 16   | 88   | 59   | 1616  | 701  |
| 149  | 96   | 10   | 123  | 78   | 105   | 93   |
| 34   | 12   | 4    | 7    | 17   | 92    | 58   |
| 146  | 319  | 563  | 95   | 42   | 1652  | 403  |
| 192  | 176  | 63   | 79   | 186  | 639   | 285  |
| 88   | 33   | 4    | 39   | 59   | 413   | 787  |
| 91   | 48   | 19   | 86   | 116  | 270   | 106  |
| 114  | 113  | 11   | 44   | 115  | 928   | 884  |
| 262  | 1494 | 734  | 626  | 34   | 375   | 377  |
| 126  | 92   | 37   | 26   | 125  | 2651  | 534  |
| 123  | 232  | 151  | 50   | 86   | 1226  | 451  |
| 298  | 161  | 16   | 145  | 88   | 106   | 54   |
| 206  | 314  | 36   | 50   | 11   | 748   | 259  |
| 269  | 87   | 4    | 19   | 178  | 427   | 162  |
| 195  | 83   | 62   | 75   | 39   | 1006  | 272  |
| 261  | 182  | 11   | 9    | 1    | 493   | 138  |
| 191  | 208  | 288  | 149  | 418  | 104   | 84   |

|     |     |     |     |     |      |     |
|-----|-----|-----|-----|-----|------|-----|
| 63  | 58  | 19  | 13  | 94  | 1336 | 321 |
| 78  | 40  | 21  | 11  | 141 | 567  | 423 |
| 103 | 78  | 26  | 33  | 137 | 401  | 188 |
| 79  | 31  | 6   | 3   | 5   | 1161 | 369 |
| 192 | 228 | 231 | 83  | 117 | 593  | 318 |
| 124 | 33  | 4   | 21  | 8   | 213  | 258 |
| 183 | 116 | 21  | 129 | 41  | 336  | 134 |
| 27  | 21  | 4   | 5   | 25  | 818  | 532 |
| 99  | 130 | 95  | 29  | 48  | 983  | 385 |
| 92  | 29  | 5   | 23  | 67  | 135  | 41  |
| 228 | 94  | 16  | 35  | 92  | 802  | 140 |
| 100 | 23  | 19  | 41  | 175 | 231  | 36  |
| 58  | 116 | 14  | 77  | 9   | 186  | 87  |
| 1   | 3   | 2   | 0   | 4   | 21   | 21  |
| 78  | 21  | 1   | 8   | 2   | 799  | 96  |
| 28  | 24  | 2   | 9   | 24  | 100  | 52  |
| 27  | 16  | 2   | 8   | 14  | 121  | 65  |
| 89  | 20  | 1   | 12  | 66  | 261  | 94  |
| 81  | 46  | 24  | 19  | 23  | 513  | 187 |
| 55  | 64  | 31  | 22  | 15  | 514  | 204 |
| 172 | 104 | 18  | 46  | 13  | 164  | 88  |
| 22  | 15  | 3   | 7   | 37  | 65   | 29  |
| 41  | 60  | 11  | 19  | 39  | 688  | 362 |
| 50  | 19  | 4   | 18  | 23  | 117  | 47  |
| 83  | 18  | 4   | 5   | 24  | 145  | 67  |
| 134 | 84  | 20  | 73  | 73  | 90   | 49  |
| 95  | 77  | 10  | 39  | 43  | 147  | 175 |
| 47  | 44  | 7   | 37  | 14  | 125  | 62  |
| 48  | 27  | 8   | 17  | 63  | 684  | 406 |
| 113 | 50  | 18  | 29  | 81  | 184  | 146 |
| 37  | 19  | 4   | 10  | 40  | 170  | 87  |
| 22  | 21  | 3   | 12  | 29  | 84   | 52  |
| 97  | 45  | 4   | 22  | 19  | 153  | 105 |
| 49  | 33  | 15  | 10  | 8   | 323  | 93  |
| 36  | 35  | 5   | 4   | 20  | 704  | 615 |
| 40  | 53  | 19  | 40  | 47  | 89   | 46  |
| 31  | 8   | 1   | 3   | 12  | 62   | 17  |
| 37  | 16  | 11  | 9   | 18  | 206  | 70  |
| 32  | 20  | 10  | 22  | 4   | 141  | 58  |
| 63  | 13  | 3   | 17  | 58  | 125  | 41  |
| 63  | 13  | 3   | 17  | 58  | 125  | 41  |
| 29  | 28  | 5   | 9   | 90  | 500  | 306 |
| 15  | 10  | 1   | 3   | 6   | 329  | 188 |
| 36  | 32  | 6   | 8   | 3   | 345  | 124 |
| 56  | 27  | 4   | 10  | 2   | 144  | 20  |
| 68  | 53  | 4   | 26  | 7   | 127  | 46  |
| 5   | 1   | 0   | 0   | 0   | 24   | 7   |
| 32  | 8   | 6   | 5   | 15  | 165  | 56  |
| 29  | 19  | 3   | 6   | 6   | 34   | 15  |
| 16  | 15  | 3   | 4   | 1   | 124  | 60  |
| 40  | 46  | 33  | 31  | 28  | 173  | 74  |
| 18  | 6   | 1   | 2   | 22  | 449  | 106 |
| 19  | 20  | 13  | 1   | 0   | 21   | 17  |
| 47  | 10  | 1   | 8   | 20  | 155  | 65  |
| 44  | 21  | 2   | 14  | 14  | 60   | 19  |
| 15  | 9   | 7   | 5   | 36  | 189  | 67  |
| 45  | 7   | 0   | 2   | 3   | 42   | 18  |
| 15  | 17  | 3   | 7   | 6   | 161  | 95  |
| 6   | 6   | 1   | 3   | 2   | 199  | 23  |

|    |    |    |    |    |     |     |
|----|----|----|----|----|-----|-----|
| 10 | 12 | 3  | 4  | 2  | 74  | 23  |
| 15 | 5  | 1  | 4  | 9  | 63  | 14  |
| 9  | 4  | 0  | 3  | 13 | 202 | 50  |
| 34 | 13 | 2  | 2  | 1  | 179 | 34  |
| 6  | 11 | 8  | 1  | 16 | 105 | 61  |
| 5  | 3  | 1  | 0  | 6  | 201 | 21  |
| 48 | 18 | 3  | 4  | 32 | 145 | 28  |
| 1  | 1  | 0  | 0  | 5  | 21  | 15  |
| 4  | 7  | 10 | 5  | 4  | 94  | 25  |
| 23 | 10 | 4  | 2  | 19 | 363 | 59  |
| 30 | 13 | 2  | 3  | 6  | 57  | 15  |
| 23 | 20 | 13 | 4  | 28 | 117 | 35  |
| 12 | 15 | 6  | 3  | 14 | 153 | 72  |
| 35 | 8  | 1  | 3  | 3  | 56  | 36  |
| 9  | 12 | 4  | 5  | 25 | 55  | 19  |
| 22 | 3  | 0  | 5  | 0  | 54  | 7   |
| 18 | 13 | 2  | 1  | 3  | 295 | 45  |
| 0  | 0  | 0  | 0  | 0  | 68  | 24  |
| 6  | 35 | 46 | 4  | 14 | 108 | 106 |
| 20 | 31 | 55 | 23 | 9  | 25  | 14  |
| 5  | 7  | 10 | 2  | 23 | 191 | 103 |
| 11 | 3  | 1  | 1  | 2  | 101 | 43  |
| 5  | 7  | 1  | 1  | 3  | 100 | 21  |
| 6  | 1  | 1  | 2  | 3  | 6   | 2   |
| 7  | 6  | 0  | 0  | 9  | 153 | 81  |
| 7  | 7  | 8  | 4  | 17 | 119 | 42  |
| 21 | 8  | 1  | 5  | 7  | 57  | 16  |
| 20 | 8  | 0  | 5  | 11 | 43  | 13  |
| 9  | 8  | 2  | 4  | 5  | 110 | 33  |
| 11 | 16 | 2  | 7  | 14 | 70  | 34  |
| 9  | 5  | 3  | 2  | 9  | 44  | 221 |
| 10 | 2  | 0  | 1  | 5  | 18  | 8   |
| 9  | 13 | 9  | 2  | 5  | 68  | 46  |
| 3  | 1  | 0  | 1  | 14 | 103 | 30  |
| 13 | 8  | 1  | 4  | 1  | 60  | 14  |
| 22 | 21 | 4  | 13 | 2  | 36  | 24  |
| 17 | 7  | 1  | 2  | 12 | 64  | 28  |
| 42 | 6  | 0  | 2  | 3  | 41  | 7   |
| 6  | 7  | 3  | 0  | 10 | 131 | 41  |
| 15 | 9  | 19 | 0  | 7  | 66  | 32  |
| 17 | 9  | 0  | 3  | 5  | 16  | 7   |
| 3  | 16 | 1  | 4  | 14 | 69  | 45  |
| 6  | 0  | 1  | 2  | 8  | 104 | 36  |
| 6  | 3  | 5  | 0  | 1  | 89  | 49  |
| 9  | 7  | 1  | 4  | 11 | 11  | 1   |
| 20 | 9  | 14 | 4  | 0  | 20  | 25  |
| 16 | 6  | 1  | 9  | 15 | 31  | 12  |
| 12 | 20 | 22 | 1  | 3  | 34  | 13  |
| 5  | 3  | 2  | 2  | 6  | 80  | 19  |
| 9  | 7  | 1  | 4  | 11 | 11  | 1   |
| 11 | 14 | 12 | 10 | 4  | 47  | 11  |
| 3  | 1  | 3  | 1  | 6  | 44  | 27  |
| 13 | 3  | 1  | 2  | 3  | 52  | 5   |
| 13 | 0  | 0  | 0  | 1  | 1   | 0   |
| 8  | 5  | 0  | 10 | 10 | 9   | 28  |
| 6  | 7  | 5  | 1  | 11 | 45  | 30  |
| 23 | 7  | 14 | 6  | 7  | 80  | 11  |
| 14 | 21 | 11 | 4  | 1  | 49  | 17  |
| 17 | 1  | 4  | 3  | 6  | 14  | 6   |

|    |    |    |    |    |    |    |
|----|----|----|----|----|----|----|
| 30 | 1  | 0  | 0  | 0  | 27 | 3  |
| 3  | 9  | 10 | 2  | 4  | 42 | 15 |
| 4  | 6  | 3  | 1  | 0  | 60 | 56 |
| 5  | 8  | 1  | 5  | 3  | 25 | 15 |
| 12 | 4  | 0  | 2  | 1  | 46 | 2  |
| 34 | 28 | 0  | 10 | 7  | 32 | 12 |
| 9  | 4  | 0  | 1  | 8  | 41 | 18 |
| 7  | 10 | 3  | 4  | 0  | 61 | 38 |
| 5  | 7  | 2  | 5  | 7  | 21 | 26 |
| 7  | 1  | 2  | 0  | 1  | 40 | 3  |
| 3  | 5  | 4  | 1  | 4  | 51 | 12 |
| 8  | 2  | 0  | 2  | 4  | 97 | 15 |
| 4  | 5  | 3  | 0  | 5  | 24 | 11 |
| 0  | 2  | 1  | 1  | 5  | 66 | 29 |
| 13 | 7  | 1  | 3  | 6  | 65 | 16 |
| 15 | 13 | 0  | 3  | 8  | 72 | 17 |
| 24 | 8  | 1  | 8  | 3  | 5  | 1  |
| 2  | 2  | 1  | 0  | 10 | 56 | 44 |
| 2  | 0  | 0  | 0  | 2  | 38 | 9  |
| 10 | 1  | 0  | 2  | 2  | 36 | 8  |
| 12 | 6  | 0  | 1  | 2  | 50 | 13 |
| 2  | 1  | 0  | 0  | 0  | 51 | 5  |
| 0  | 2  | 0  | 0  | 0  | 1  | 0  |
| 5  | 6  | 1  | 1  | 9  | 31 | 8  |
| 18 | 2  | 1  | 1  | 12 | 2  | 2  |
| 4  | 5  | 0  | 0  | 2  | 51 | 24 |
| 7  | 4  | 0  | 6  | 2  | 38 | 18 |
| 2  | 4  | 2  | 1  | 6  | 34 | 25 |
| 18 | 3  | 0  | 1  | 8  | 26 | 2  |
| 3  | 0  | 0  | 0  | 1  | 24 | 7  |
| 3  | 0  | 0  | 0  | 1  | 15 | 8  |
| 0  | 1  | 0  | 0  | 1  | 44 | 8  |
| 4  | 1  | 6  | 0  | 4  | 34 | 19 |
| 7  | 7  | 1  | 2  | 5  | 23 | 20 |
| 6  | 2  | 1  | 6  | 7  | 5  | 10 |
| 7  | 8  | 5  | 8  | 1  | 19 | 5  |
| 1  | 0  | 0  | 0  | 3  | 3  | 0  |
| 2  | 4  | 1  | 0  | 0  | 39 | 14 |
| 2  | 0  | 0  | 0  | 0  | 12 | 2  |
| 0  | 9  | 1  | 3  | 1  | 12 | 10 |
| 4  | 2  | 0  | 0  | 0  | 9  | 5  |
| 8  | 1  | 0  | 1  | 9  | 31 | 14 |
| 14 | 2  | 0  | 2  | 1  | 28 | 7  |
| 2  | 3  | 0  | 0  | 3  | 27 | 9  |
| 5  | 3  | 1  | 1  | 2  | 22 | 7  |
| 2  | 1  | 0  | 0  | 0  | 32 | 8  |
| 14 | 3  | 0  | 2  | 7  | 8  | 0  |
| 11 | 9  | 0  | 2  | 1  | 19 | 12 |
| 11 | 9  | 0  | 2  | 1  | 19 | 12 |
| 1  | 0  | 4  | 2  | 1  | 12 | 5  |
| 3  | 0  | 1  | 1  | 4  | 47 | 19 |
| 0  | 1  | 2  | 0  | 3  | 8  | 9  |
| 2  | 0  | 1  | 0  | 1  | 12 | 6  |
| 5  | 3  | 0  | 2  | 4  | 25 | 3  |
| 3  | 0  | 0  | 2  | 3  | 65 | 5  |
| 5  | 6  | 3  | 6  | 3  | 4  | 7  |
| 1  | 2  | 0  | 1  | 3  | 16 | 9  |
| 11 | 2  | 0  | 0  | 1  | 3  | 5  |
| 12 | 1  | 0  | 2  | 11 | 36 | 18 |

|    |    |   |   |   |    |    |
|----|----|---|---|---|----|----|
| 11 | 2  | 0 | 0 | 4 | 19 | 8  |
| 0  | 0  | 0 | 0 | 1 | 34 | 7  |
| 3  | 5  | 1 | 1 | 5 | 12 | 14 |
| 0  | 0  | 0 | 0 | 1 | 0  | 1  |
| 3  | 3  | 1 | 0 | 3 | 25 | 9  |
| 16 | 3  | 0 | 1 | 2 | 4  | 2  |
| 1  | 1  | 0 | 0 | 2 | 10 | 10 |
| 1  | 2  | 4 | 0 | 3 | 16 | 17 |
| 15 | 3  | 0 | 1 | 1 | 1  | 2  |
| 2  | 1  | 1 | 1 | 6 | 6  | 2  |
| 3  | 0  | 0 | 0 | 5 | 9  | 4  |
| 0  | 4  | 1 | 1 | 1 | 7  | 2  |
| 2  | 0  | 1 | 0 | 3 | 21 | 4  |
| 0  | 1  | 0 | 0 | 0 | 3  | 4  |
| 3  | 0  | 0 | 0 | 0 | 7  | 1  |
| 1  | 1  | 0 | 0 | 2 | 25 | 11 |
| 2  | 0  | 1 | 1 | 1 | 28 | 6  |
| 0  | 0  | 0 | 0 | 1 | 27 | 3  |
| 4  | 2  | 0 | 0 | 3 | 7  | 5  |
| 0  | 0  | 0 | 0 | 0 | 0  | 1  |
| 5  | 4  | 1 | 2 | 4 | 11 | 20 |
| 2  | 2  | 0 | 2 | 1 | 13 | 6  |
| 4  | 72 | 0 | 0 | 0 | 7  | 9  |
| 2  | 0  | 1 | 1 | 0 | 15 | 6  |
| 9  | 1  | 3 | 2 | 0 | 5  | 5  |
| 4  | 4  | 4 | 2 | 6 | 21 | 7  |
| 3  | 0  | 3 | 0 | 3 | 24 | 11 |
| 2  | 1  | 1 | 0 | 2 | 16 | 7  |
| 3  | 3  | 1 | 2 | 0 | 7  | 1  |
| 5  | 0  | 0 | 2 | 1 | 22 | 9  |
| 4  | 2  | 1 | 2 | 1 | 19 | 5  |
| 4  | 3  | 0 | 0 | 2 | 20 | 1  |
| 2  | 1  | 0 | 2 | 1 | 13 | 3  |
| 2  | 0  | 0 | 0 | 3 | 18 | 8  |
| 0  | 2  | 0 | 1 | 1 | 0  | 0  |
| 4  | 0  | 0 | 0 | 2 | 3  | 6  |
| 4  | 5  | 0 | 3 | 1 | 2  | 0  |
| 0  | 1  | 0 | 1 | 0 | 19 | 14 |
| 2  | 2  | 2 | 1 | 0 | 12 | 11 |
| 0  | 0  | 0 | 0 | 0 | 17 | 6  |
| 2  | 1  | 0 | 0 | 1 | 7  | 3  |
| 7  | 0  | 0 | 2 | 1 | 6  | 3  |
| 2  | 0  | 6 | 3 | 3 | 9  | 4  |
| 2  | 1  | 0 | 1 | 0 | 8  | 3  |
| 2  | 0  | 1 | 1 | 1 | 16 | 4  |
| 2  | 0  | 0 | 0 | 0 | 7  | 3  |
| 0  | 3  | 0 | 0 | 0 | 11 | 1  |
| 3  | 0  | 1 | 1 | 3 | 12 | 2  |
| 1  | 0  | 0 | 0 | 0 | 32 | 7  |
| 1  | 0  | 5 | 0 | 0 | 10 | 7  |
| 5  | 3  | 0 | 0 | 0 | 8  | 1  |
| 0  | 0  | 0 | 0 | 1 | 14 | 5  |
| 2  | 0  | 0 | 0 | 0 | 9  | 3  |
| 1  | 1  | 0 | 0 | 0 | 10 | 4  |
| 4  | 2  | 0 | 0 | 0 | 36 | 12 |
| 2  | 0  | 0 | 0 | 0 | 10 | 0  |
| 0  | 1  | 2 | 0 | 0 | 12 | 4  |
| 4  | 3  | 0 | 3 | 1 | 3  | 0  |
| 2  | 2  | 0 | 0 | 1 | 1  | 1  |

|   |   |   |   |    |    |    |
|---|---|---|---|----|----|----|
| 2 | 0 | 0 | 0 | 0  | 13 | 2  |
| 3 | 2 | 3 | 1 | 3  | 4  | 7  |
| 0 | 2 | 4 | 0 | 1  | 18 | 15 |
| 2 | 1 | 1 | 0 | 0  | 13 | 7  |
| 2 | 1 | 0 | 1 | 0  | 14 | 10 |
| 2 | 0 | 0 | 1 | 1  | 4  | 0  |
| 1 | 1 | 0 | 0 | 1  | 17 | 3  |
| 0 | 1 | 0 | 1 | 2  | 2  | 1  |
| 0 | 2 | 1 | 0 | 1  | 15 | 2  |
| 0 | 0 | 0 | 0 | 0  | 9  | 0  |
| 1 | 3 | 1 | 0 | 1  | 14 | 5  |
| 3 | 2 | 0 | 4 | 0  | 5  | 0  |
| 0 | 0 | 0 | 0 | 4  | 0  | 2  |
| 1 | 0 | 2 | 0 | 0  | 19 | 2  |
| 3 | 0 | 0 | 0 | 1  | 2  | 2  |
| 0 | 0 | 2 | 0 | 0  | 13 | 4  |
| 1 | 0 | 0 | 0 | 2  | 16 | 4  |
| 3 | 0 | 0 | 0 | 0  | 10 | 2  |
| 0 | 0 | 0 | 1 | 0  | 1  | 0  |
| 2 | 2 | 1 | 0 | 1  | 24 | 5  |
| 6 | 2 | 0 | 1 | 4  | 1  | 1  |
| 0 | 1 | 0 | 0 | 2  | 10 | 2  |
| 0 | 1 | 0 | 0 | 1  | 3  | 4  |
| 3 | 0 | 2 | 0 | 0  | 30 | 2  |
| 1 | 0 | 0 | 0 | 0  | 0  | 0  |
| 3 | 4 | 0 | 0 | 1  | 3  | 5  |
| 2 | 6 | 1 | 1 | 0  | 12 | 2  |
| 0 | 0 | 0 | 0 | 0  | 14 | 5  |
| 1 | 0 | 0 | 0 | 0  | 2  | 3  |
| 1 | 2 | 0 | 0 | 1  | 18 | 10 |
| 3 | 2 | 2 | 1 | 0  | 12 | 2  |
| 1 | 1 | 0 | 0 | 0  | 1  | 1  |
| 0 | 0 | 0 | 0 | 1  | 5  | 3  |
| 2 | 0 | 1 | 4 | 0  | 2  | 0  |
| 2 | 0 | 0 | 0 | 1  | 4  | 2  |
| 3 | 1 | 0 | 0 | 0  | 7  | 6  |
| 2 | 0 | 0 | 0 | 1  | 19 | 6  |
| 1 | 0 | 0 | 0 | 0  | 3  | 2  |
| 3 | 0 | 1 | 2 | 21 | 15 | 4  |
| 0 | 0 | 0 | 2 | 0  | 1  | 1  |
| 0 | 1 | 1 | 0 | 2  | 5  | 1  |
| 2 | 0 | 0 | 0 | 0  | 6  | 5  |
| 1 | 1 | 0 | 0 | 0  | 2  | 2  |
| 1 | 1 | 0 | 1 | 0  | 11 | 2  |
| 1 | 0 | 0 | 1 | 0  | 3  | 5  |
| 2 | 0 | 1 | 0 | 2  | 6  | 4  |
| 1 | 2 | 0 | 0 | 0  | 9  | 1  |
| 4 | 2 | 0 | 0 | 0  | 14 | 3  |
| 1 | 0 | 0 | 0 | 0  | 0  | 0  |
| 2 | 2 | 0 | 1 | 0  | 6  | 4  |
| 0 | 1 | 3 | 1 | 1  | 3  | 5  |
| 2 | 0 | 1 | 1 | 0  | 0  | 0  |
| 2 | 0 | 0 | 0 | 0  | 1  | 1  |
| 1 | 0 | 0 | 0 | 2  | 2  | 0  |
| 1 | 0 | 0 | 0 | 0  | 9  | 4  |
| 0 | 0 | 0 | 0 | 0  | 19 | 3  |
| 8 | 1 | 0 | 1 | 0  | 1  | 0  |
| 1 | 0 | 0 | 0 | 2  | 6  | 1  |
| 0 | 1 | 1 | 0 | 0  | 3  | 0  |

|   |   |   |   |   |    |   |
|---|---|---|---|---|----|---|
| 3 | 1 | 0 | 0 | 0 | 0  | 0 |
| 0 | 0 | 0 | 0 | 0 | 2  | 1 |
| 0 | 0 | 1 | 1 | 0 | 4  | 2 |
| 4 | 0 | 0 | 1 | 0 | 5  | 5 |
| 0 | 0 | 0 | 0 | 0 | 5  | 7 |
| 1 | 0 | 0 | 0 | 1 | 11 | 2 |
| 4 | 0 | 0 | 0 | 0 | 10 | 2 |
| 5 | 0 | 0 | 2 | 0 | 8  | 1 |
| 1 | 0 | 0 | 0 | 0 | 0  | 0 |
| 4 | 2 | 0 | 0 | 0 | 2  | 2 |
| 1 | 0 | 0 | 0 | 0 | 7  | 0 |
| 0 | 1 | 0 | 0 | 0 | 1  | 1 |
| 0 | 0 | 0 | 0 | 1 | 13 | 8 |
| 0 | 0 | 0 | 0 | 0 | 1  | 0 |
| 2 | 2 | 0 | 0 | 0 | 5  | 3 |
| 0 | 0 | 0 | 0 | 0 | 3  | 2 |
| 0 | 1 | 0 | 0 | 0 | 2  | 0 |
| 1 | 0 | 0 | 0 | 0 | 11 | 0 |
| 4 | 0 | 0 | 0 | 0 | 3  | 0 |
| 0 | 0 | 0 | 0 | 0 | 0  | 3 |
| 1 | 2 | 0 | 3 | 0 | 14 | 6 |
| 0 | 1 | 0 | 0 | 0 | 3  | 0 |
| 1 | 5 | 1 | 9 | 0 | 1  | 2 |
| 1 | 0 | 0 | 0 | 0 | 4  | 0 |
| 0 | 0 | 0 | 0 | 0 | 2  | 5 |
| 0 | 0 | 0 | 0 | 0 | 22 | 1 |
| 0 | 0 | 0 | 0 | 1 | 0  | 1 |
| 0 | 0 | 0 | 0 | 0 | 8  | 2 |
| 1 | 2 | 0 | 0 | 0 | 0  | 0 |
| 0 | 0 | 0 | 0 | 0 | 0  | 0 |
| 0 | 1 | 0 | 0 | 0 | 1  | 2 |
| 0 | 0 | 1 | 1 | 0 | 3  | 2 |
| 0 | 0 | 0 | 0 | 0 | 4  | 6 |
| 2 | 0 | 0 | 0 | 0 | 1  | 0 |
| 0 | 3 | 1 | 0 | 0 | 3  | 0 |
| 0 | 0 | 0 | 0 | 0 | 2  | 0 |
| 1 | 0 | 0 | 1 | 0 | 0  | 2 |
| 0 | 0 | 0 | 0 | 0 | 0  | 0 |
| 0 | 0 | 0 | 0 | 0 | 0  | 0 |
| 1 | 0 | 0 | 0 | 0 | 6  | 0 |
| 1 | 2 | 0 | 0 | 0 | 0  | 1 |
| 1 | 0 | 0 | 0 | 0 | 2  | 2 |
| 1 | 0 | 0 | 0 | 1 | 2  | 2 |
| 0 | 0 | 0 | 0 | 0 | 2  | 1 |
| 0 | 0 | 0 | 0 | 0 | 0  | 0 |
| 0 | 0 | 0 | 1 | 1 | 1  | 0 |
| 1 | 0 | 0 | 1 | 0 | 2  | 2 |
| 1 | 0 | 0 | 0 | 0 | 1  | 6 |
| 0 | 0 | 0 | 0 | 1 | 2  | 1 |
| 0 | 0 | 0 | 0 | 0 | 9  | 2 |
| 0 | 0 | 0 | 0 | 0 | 2  | 0 |
| 0 | 0 | 0 | 0 | 0 | 0  | 0 |
| 0 | 0 | 0 | 0 | 0 | 2  | 0 |
| 0 | 0 | 0 | 0 | 1 | 4  | 0 |
| 0 | 0 | 0 | 0 | 0 | 1  | 0 |
| 1 | 1 | 0 | 0 | 0 | 5  | 2 |
| 0 | 0 | 0 | 0 | 0 | 0  | 1 |
| 0 | 1 | 0 | 0 | 0 | 4  | 0 |
| 0 | 1 | 0 | 0 | 0 | 1  | 2 |



|   |   |   |   |   |    |   |
|---|---|---|---|---|----|---|
| 0 | 0 | 0 | 0 | 0 | 2  | 0 |
| 2 | 0 | 0 | 1 | 1 | 6  | 3 |
| 1 | 1 | 0 | 1 | 0 | 1  | 1 |
| 0 | 1 | 0 | 0 | 0 | 1  | 0 |
| 1 | 0 | 0 | 0 | 0 | 5  | 1 |
| 0 | 0 | 0 | 0 | 0 | 5  | 2 |
| 1 | 1 | 0 | 0 | 1 | 3  | 0 |
| 0 | 0 | 0 | 0 | 0 | 0  | 0 |
| 0 | 0 | 0 | 0 | 1 | 4  | 4 |
| 0 | 1 | 0 | 0 | 1 | 0  | 1 |
| 0 | 0 | 0 | 0 | 0 | 2  | 0 |
| 0 | 0 | 0 | 0 | 1 | 7  | 3 |
| 0 | 0 | 0 | 0 | 1 | 0  | 0 |
| 0 | 0 | 0 | 0 | 1 | 1  | 0 |
| 0 | 2 | 0 | 0 | 0 | 3  | 2 |
| 0 | 0 | 0 | 0 | 0 | 2  | 1 |
| 0 | 1 | 0 | 0 | 0 | 1  | 0 |
| 1 | 2 | 0 | 0 | 1 | 1  | 1 |
| 0 | 0 | 0 | 1 | 0 | 1  | 0 |
| 0 | 0 | 0 | 0 | 2 | 2  | 0 |
| 2 | 0 | 0 | 0 | 0 | 2  | 1 |
| 0 | 0 | 0 | 0 | 1 | 0  | 1 |
| 3 | 0 | 0 | 0 | 0 | 1  | 1 |
| 0 | 0 | 0 | 0 | 0 | 4  | 1 |
| 0 | 0 | 0 | 0 | 0 | 2  | 0 |
| 0 | 0 | 0 | 0 | 0 | 3  | 2 |
| 0 | 0 | 0 | 0 | 0 | 12 | 0 |
| 0 | 0 | 0 | 0 | 0 | 6  | 1 |
| 3 | 1 | 0 | 0 | 0 | 3  | 1 |
| 0 | 1 | 0 | 0 | 0 | 3  | 1 |
| 0 | 0 | 0 | 0 | 0 | 2  | 0 |
| 0 | 0 | 0 | 0 | 0 | 1  | 0 |
| 0 | 0 | 0 | 0 | 0 | 2  | 1 |
| 1 | 0 | 0 | 0 | 0 | 1  | 1 |
| 0 | 0 | 0 | 1 | 0 | 2  | 1 |
| 0 | 0 | 0 | 1 | 0 | 2  | 1 |
| 1 | 0 | 0 | 0 | 0 | 2  | 4 |
| 0 | 0 | 0 | 0 | 0 | 0  | 1 |
| 0 | 0 | 0 | 0 | 0 | 0  | 0 |
| 1 | 0 | 0 | 0 | 0 | 3  | 0 |
| 0 | 0 | 0 | 0 | 0 | 0  | 3 |
| 0 | 0 | 1 | 0 | 2 | 1  | 0 |
| 2 | 0 | 0 | 0 | 1 | 2  | 1 |
| 0 | 1 | 0 | 0 | 0 | 0  | 0 |
| 1 | 1 | 0 | 0 | 0 | 0  | 0 |
| 0 | 1 | 0 | 0 | 0 | 1  | 2 |
| 0 | 0 | 0 | 0 | 0 | 3  | 1 |
| 1 | 0 | 0 | 0 | 0 | 0  | 0 |
| 0 | 0 | 0 | 1 | 0 | 0  | 0 |
| 0 | 0 | 0 | 0 | 1 | 6  | 2 |
| 1 | 0 | 0 | 0 | 0 | 3  | 2 |
| 0 | 0 | 0 | 0 | 0 | 0  | 0 |
| 0 | 1 | 0 | 0 | 0 | 1  | 0 |
| 0 | 0 | 0 | 0 | 0 | 0  | 0 |
| 0 | 0 | 0 | 0 | 0 | 2  | 0 |
| 0 | 1 | 0 | 0 | 1 | 2  | 2 |
| 0 | 0 | 0 | 0 | 1 | 0  | 0 |
| 0 | 0 | 0 | 0 | 1 | 7  | 2 |
| 1 | 0 | 0 | 0 | 1 | 2  | 0 |

|   |   |   |   |   |    |   |
|---|---|---|---|---|----|---|
| 1 | 0 | 0 | 0 | 0 | 11 | 4 |
| 0 | 0 | 0 | 0 | 0 | 2  | 2 |
| 1 | 0 | 0 | 0 | 0 | 2  | 1 |
| 0 | 0 | 0 | 0 | 0 | 1  | 0 |
| 0 | 0 | 0 | 1 | 0 | 5  | 0 |
| 1 | 0 | 0 | 0 | 0 | 0  | 2 |
| 0 | 0 | 0 | 1 | 0 | 0  | 0 |
| 0 | 0 | 1 | 0 | 0 | 2  | 0 |
| 0 | 0 | 0 | 0 | 1 | 1  | 2 |
| 1 | 0 | 0 | 0 | 0 | 1  | 0 |
| 2 | 0 | 0 | 0 | 0 | 4  | 0 |
| 0 | 0 | 0 | 1 | 0 | 1  | 1 |
| 0 | 1 | 0 | 0 | 0 | 0  | 0 |
| 0 | 0 | 0 | 2 | 0 | 0  | 0 |
| 0 | 1 | 0 | 0 | 0 | 1  | 0 |
| 0 | 0 | 1 | 0 | 0 | 1  | 1 |
| 0 | 0 | 0 | 0 | 0 | 2  | 0 |
| 0 | 1 | 0 | 0 | 0 | 2  | 1 |
| 0 | 0 | 0 | 0 | 0 | 1  | 0 |
| 0 | 0 | 0 | 0 | 0 | 0  | 0 |
| 1 | 0 | 0 | 0 | 0 | 0  | 0 |
| 1 | 0 | 0 | 0 | 0 | 3  | 0 |
| 1 | 0 | 0 | 0 | 0 | 0  | 0 |
| 1 | 0 | 0 | 0 | 0 | 2  | 1 |
| 0 | 0 | 0 | 0 | 0 | 1  | 1 |
| 0 | 0 | 0 | 0 | 0 | 3  | 1 |
| 0 | 0 | 0 | 0 | 0 | 1  | 0 |
| 0 | 0 | 2 | 0 | 0 | 2  | 2 |
| 0 | 1 | 0 | 0 | 0 | 1  | 1 |
| 0 | 0 | 0 | 0 | 0 | 2  | 1 |
| 0 | 0 | 0 | 0 | 0 | 0  | 0 |
| 0 | 0 | 0 | 0 | 0 | 2  | 0 |
| 0 | 0 | 0 | 0 | 0 | 2  | 1 |
| 0 | 0 | 1 | 0 | 0 | 6  | 2 |
| 0 | 0 | 0 | 0 | 0 | 3  | 1 |
| 0 | 1 | 0 | 0 | 0 | 2  | 1 |
| 0 | 0 | 0 | 0 | 0 | 1  | 0 |
| 1 | 0 | 0 | 0 | 1 | 1  | 2 |

|        |        |        |        |        |         |        |
|--------|--------|--------|--------|--------|---------|--------|
| 0.15   | 0.02   | 0.31   | 0.94   | 0.02   | 0.54    | 0.27   |
| 25     | 38     | 22     | 5      | 36     | 18      | 24     |
| 1      | 1      | 1      | 1      | 1      | 1       | 1      |
| 29     | 30     | 31     | 32     | 33     | 34      | 35     |
| 2      | 3      | 4      | 5      | 6      | 7       | 8      |
| A_13   | A_14   | A_15   | A_17   | B_30   | B_33    | C_2    |
| CHR_NP | CHR_NP | CHR_NP | CHR_NP | CHR_NP | CHR_NP  | CHR_NP |
| 371228 | 359180 | 111957 | 117100 | 148505 | 1922117 | 685397 |
| CHR_NP | CHR_NP | CHR_NP | CHR_NP | CHR_NP | CHR_NP  | CHR_NP |
| 147840 | 177482 | 52963  | 22366  | 4948   | 1007604 | 324840 |
| 35930  | 51767  | 20495  | 29235  | 27066  | 82363   | 53864  |
| 12104  | 6580   | 1299   | 1849   | 6598   | 53526   | 26948  |
| 16001  | 12349  | 7379   | 5916   | 19460  | 105395  | 30924  |
| 9346   | 6914   | 1958   | 1959   | 4335   | 185758  | 52795  |

|       |       |      |      |       |       |       |
|-------|-------|------|------|-------|-------|-------|
| 10799 | 6151  | 691  | 3614 | 21454 | 22114 | 14962 |
| 19819 | 6870  | 944  | 3558 | 15329 | 42853 | 11026 |
| 1527  | 2921  | 163  | 2170 | 2182  | 4727  | 8808  |
| 6157  | 4266  | 404  | 1038 | 731   | 14989 | 4841  |
| 13201 | 15998 | 3982 | 7085 | 3504  | 41754 | 23520 |
| 5579  | 5618  | 2306 | 2495 | 1040  | 18898 | 8215  |
| 3134  | 2436  | 1260 | 877  | 1737  | 26780 | 9268  |
| 4281  | 1757  | 431  | 1073 | 2414  | 9346  | 2814  |
| 1945  | 2684  | 2259 | 900  | 1939  | 29210 | 14032 |
| 4985  | 2226  | 199  | 1781 | 2405  | 3647  | 1546  |
| 1264  | 411   | 112  | 52   | 145   | 33307 | 3175  |
| 3018  | 1229  | 106  | 957  | 2972  | 4989  | 1148  |
| 2248  | 2621  | 714  | 1153 | 1417  | 8203  | 5081  |
| 3758  | 1850  | 237  | 1112 | 933   | 6588  | 2949  |
| 9783  | 6100  | 1083 | 3458 | 438   | 14685 | 3594  |
| 1383  | 1406  | 359  | 487  | 623   | 10198 | 3542  |
| 1314  | 1891  | 915  | 526  | 355   | 9348  | 4198  |
| 5620  | 2161  | 199  | 1136 | 195   | 8208  | 1746  |
| 2400  | 1130  | 56   | 484  | 2483  | 9903  | 3570  |
| 6796  | 3573  | 117  | 4142 | 618   | 960   | 351   |
| 2005  | 975   | 141  | 139  | 78    | 8786  | 2119  |
| 507   | 587   | 585  | 135  | 387   | 7245  | 2471  |
| 1135  | 2743  | 554  | 1838 | 209   | 3111  | 2406  |
| 1375  | 1018  | 338  | 583  | 1384  | 1840  | 832   |
| 1634  | 1050  | 476  | 473  | 118   | 5546  | 1298  |
| 1176  | 613   | 83   | 382  | 712   | 6198  | 2874  |
| 426   | 233   | 167  | 165  | 698   | 5805  | 1680  |
| 977   | 302   | 45   | 211  | 323   | 2251  | 767   |
| 1253  | 256   | 39   | 320  | 235   | 3245  | 1664  |
| 925   | 696   | 218  | 398  | 1268  | 1654  | 759   |
| 554   | 984   | 787  | 356  | 3972  | 9791  | 8590  |
| 2739  | 2759  | 690  | 2208 | 1051  | 2501  | 1914  |
| 3837  | 2951  | 380  | 2482 | 858   | 1145  | 524   |
| 3049  | 1325  | 876  | 1032 | 764   | 7023  | 2647  |
| 501   | 118   | 65   | 149  | 126   | 5223  | 653   |
| 897   | 502   | 298  | 168  | 602   | 13459 | 3447  |
| 342   | 209   | 55   | 107  | 64    | 2501  | 1026  |
| 610   | 584   | 464  | 188  | 608   | 5028  | 1644  |
| 521   | 702   | 99   | 874  | 608   | 572   | 534   |
| 753   | 768   | 109  | 319  | 314   | 1352  | 1203  |
| 738   | 377   | 94   | 183  | 93    | 3818  | 1085  |
| 702   | 365   | 57   | 215  | 134   | 1371  | 356   |
| 320   | 333   | 130  | 75   | 71    | 4788  | 1628  |
| 49    | 23    | 6    | 5    | 35    | 117   | 59    |
| 825   | 296   | 4    | 107  | 32    | 4093  | 805   |
| 729   | 329   | 582  | 316  | 129   | 1251  | 597   |
| 425   | 233   | 14   | 98   | 829   | 1597  | 1573  |
| 283   | 357   | 204  | 128  | 186   | 2136  | 1799  |
| 1492  | 856   | 62   | 345  | 89    | 2497  | 468   |
| 588   | 64    | 1    | 1    | 3     | 2771  | 336   |
| 90    | 41    | 4    | 26   | 5     | 119   | 63    |
| 272   | 171   | 55   | 78   | 374   | 1787  | 972   |
| 160   | 92    | 6    | 26   | 128   | 3593  | 697   |
| 333   | 316   | 56   | 73   | 77    | 1228  | 427   |
| 416   | 324   | 226  | 110  | 1831  | 389   | 166   |
| 183   | 110   | 40   | 66   | 177   | 1864  | 741   |
| 257   | 174   | 16   | 88   | 59    | 1616  | 701   |
| 149   | 96    | 10   | 123  | 78    | 105   | 93    |
| 34    | 12    | 4    | 7    | 17    | 92    | 58    |

|     |      |     |     |     |      |     |
|-----|------|-----|-----|-----|------|-----|
| 146 | 319  | 563 | 95  | 42  | 1652 | 403 |
| 192 | 176  | 63  | 79  | 186 | 639  | 285 |
| 88  | 33   | 4   | 39  | 59  | 413  | 787 |
| 91  | 48   | 19  | 86  | 116 | 270  | 106 |
| 114 | 113  | 11  | 44  | 115 | 928  | 884 |
| 262 | 1494 | 734 | 626 | 34  | 375  | 377 |
| 126 | 92   | 37  | 26  | 125 | 2651 | 534 |
| 123 | 232  | 151 | 50  | 86  | 1226 | 451 |
| 298 | 161  | 16  | 145 | 88  | 106  | 54  |
| 206 | 314  | 36  | 50  | 11  | 748  | 259 |
| 269 | 87   | 4   | 19  | 178 | 427  | 162 |
| 195 | 83   | 62  | 75  | 39  | 1006 | 272 |
| 261 | 182  | 11  | 9   | 1   | 493  | 138 |
| 191 | 208  | 288 | 149 | 418 | 104  | 84  |
| 63  | 58   | 19  | 13  | 94  | 1336 | 321 |
| 78  | 40   | 21  | 11  | 141 | 567  | 423 |
| 103 | 78   | 26  | 33  | 137 | 401  | 188 |
| 79  | 31   | 6   | 3   | 5   | 1161 | 369 |
| 192 | 228  | 231 | 83  | 117 | 593  | 318 |
| 124 | 33   | 4   | 21  | 8   | 213  | 258 |
| 183 | 116  | 21  | 129 | 41  | 336  | 134 |
| 27  | 21   | 4   | 5   | 25  | 818  | 532 |
| 99  | 130  | 95  | 29  | 48  | 983  | 385 |
| 92  | 29   | 5   | 23  | 67  | 135  | 41  |
| 228 | 94   | 16  | 35  | 92  | 802  | 140 |
| 100 | 23   | 19  | 41  | 175 | 231  | 36  |
| 58  | 116  | 14  | 77  | 9   | 186  | 87  |
| 1   | 3    | 2   | 0   | 4   | 21   | 21  |
| 78  | 21   | 1   | 8   | 2   | 799  | 96  |
| 28  | 24   | 2   | 9   | 24  | 100  | 52  |
| 27  | 16   | 2   | 8   | 14  | 121  | 65  |
| 89  | 20   | 1   | 12  | 66  | 261  | 94  |
| 81  | 46   | 24  | 19  | 23  | 513  | 187 |
| 55  | 64   | 31  | 22  | 15  | 514  | 204 |
| 172 | 104  | 18  | 46  | 13  | 164  | 88  |
| 22  | 15   | 3   | 7   | 37  | 65   | 29  |
| 41  | 60   | 11  | 19  | 39  | 688  | 362 |
| 50  | 19   | 4   | 18  | 23  | 117  | 47  |
| 83  | 18   | 4   | 5   | 24  | 145  | 67  |
| 134 | 84   | 20  | 73  | 73  | 90   | 49  |
| 95  | 77   | 10  | 39  | 43  | 147  | 175 |
| 47  | 44   | 7   | 37  | 14  | 125  | 62  |
| 48  | 27   | 8   | 17  | 63  | 684  | 406 |
| 113 | 50   | 18  | 29  | 81  | 184  | 146 |
| 37  | 19   | 4   | 10  | 40  | 170  | 87  |
| 22  | 21   | 3   | 12  | 29  | 84   | 52  |
| 97  | 45   | 4   | 22  | 19  | 153  | 105 |
| 49  | 33   | 15  | 10  | 8   | 323  | 93  |
| 36  | 35   | 5   | 4   | 20  | 704  | 615 |
| 40  | 53   | 19  | 40  | 47  | 89   | 46  |
| 31  | 8    | 1   | 3   | 12  | 62   | 17  |
| 37  | 16   | 11  | 9   | 18  | 206  | 70  |
| 32  | 20   | 10  | 22  | 4   | 141  | 58  |
| 63  | 13   | 3   | 17  | 58  | 125  | 41  |
| 63  | 13   | 3   | 17  | 58  | 125  | 41  |
| 29  | 28   | 5   | 9   | 90  | 500  | 306 |
| 15  | 10   | 1   | 3   | 6   | 329  | 188 |
| 36  | 32   | 6   | 8   | 3   | 345  | 124 |
| 56  | 27   | 4   | 10  | 2   | 144  | 20  |

|    |    |    |    |    |     |     |
|----|----|----|----|----|-----|-----|
| 68 | 53 | 4  | 26 | 7  | 127 | 46  |
| 5  | 1  | 0  | 0  | 0  | 24  | 7   |
| 32 | 8  | 6  | 5  | 15 | 165 | 56  |
| 29 | 19 | 3  | 6  | 6  | 34  | 15  |
| 16 | 15 | 3  | 4  | 1  | 124 | 60  |
| 40 | 46 | 33 | 31 | 28 | 173 | 74  |
| 18 | 6  | 1  | 2  | 22 | 449 | 106 |
| 19 | 20 | 13 | 1  | 0  | 21  | 17  |
| 47 | 10 | 1  | 8  | 20 | 155 | 65  |
| 44 | 21 | 2  | 14 | 14 | 60  | 19  |
| 15 | 9  | 7  | 5  | 36 | 189 | 67  |
| 45 | 7  | 0  | 2  | 3  | 42  | 18  |
| 15 | 17 | 3  | 7  | 6  | 161 | 95  |
| 6  | 6  | 1  | 3  | 2  | 199 | 23  |
| 10 | 12 | 3  | 4  | 2  | 74  | 23  |
| 15 | 5  | 1  | 4  | 9  | 63  | 14  |
| 9  | 4  | 0  | 3  | 13 | 202 | 50  |
| 34 | 13 | 2  | 2  | 1  | 179 | 34  |
| 6  | 11 | 8  | 1  | 16 | 105 | 61  |
| 5  | 3  | 1  | 0  | 6  | 201 | 21  |
| 48 | 18 | 3  | 4  | 32 | 145 | 28  |
| 1  | 1  | 0  | 0  | 5  | 21  | 15  |
| 4  | 7  | 10 | 5  | 4  | 94  | 25  |
| 23 | 10 | 4  | 2  | 19 | 363 | 59  |
| 30 | 13 | 2  | 3  | 6  | 57  | 15  |
| 23 | 20 | 13 | 4  | 28 | 117 | 35  |
| 12 | 15 | 6  | 3  | 14 | 153 | 72  |
| 35 | 8  | 1  | 3  | 3  | 56  | 36  |
| 9  | 12 | 4  | 5  | 25 | 55  | 19  |
| 22 | 3  | 0  | 5  | 0  | 54  | 7   |
| 18 | 13 | 2  | 1  | 3  | 295 | 45  |
| 0  | 0  | 0  | 0  | 0  | 68  | 24  |
| 6  | 35 | 46 | 4  | 14 | 108 | 106 |
| 20 | 31 | 55 | 23 | 9  | 25  | 14  |
| 5  | 7  | 10 | 2  | 23 | 191 | 103 |
| 11 | 3  | 1  | 1  | 2  | 101 | 43  |
| 5  | 7  | 1  | 1  | 3  | 100 | 21  |
| 6  | 1  | 1  | 2  | 3  | 6   | 2   |
| 7  | 6  | 0  | 0  | 9  | 153 | 81  |
| 7  | 7  | 8  | 4  | 17 | 119 | 42  |
| 21 | 8  | 1  | 5  | 7  | 57  | 16  |
| 20 | 8  | 0  | 5  | 11 | 43  | 13  |
| 9  | 8  | 2  | 4  | 5  | 110 | 33  |
| 11 | 16 | 2  | 7  | 14 | 70  | 34  |
| 9  | 5  | 3  | 2  | 9  | 44  | 221 |
| 10 | 2  | 0  | 1  | 5  | 18  | 8   |
| 9  | 13 | 9  | 2  | 5  | 68  | 46  |
| 3  | 1  | 0  | 1  | 14 | 103 | 30  |
| 13 | 8  | 1  | 4  | 1  | 60  | 14  |
| 22 | 21 | 4  | 13 | 2  | 36  | 24  |
| 17 | 7  | 1  | 2  | 12 | 64  | 28  |
| 42 | 6  | 0  | 2  | 3  | 41  | 7   |
| 6  | 7  | 3  | 0  | 10 | 131 | 41  |
| 15 | 9  | 19 | 0  | 7  | 66  | 32  |
| 17 | 9  | 0  | 3  | 5  | 16  | 7   |
| 3  | 16 | 1  | 4  | 14 | 69  | 45  |
| 6  | 0  | 1  | 2  | 8  | 104 | 36  |
| 6  | 3  | 5  | 0  | 1  | 89  | 49  |
| 9  | 7  | 1  | 4  | 11 | 11  | 1   |

|    |    |    |    |    |    |    |
|----|----|----|----|----|----|----|
| 20 | 9  | 14 | 4  | 0  | 20 | 25 |
| 16 | 6  | 1  | 9  | 15 | 31 | 12 |
| 12 | 20 | 22 | 1  | 3  | 34 | 13 |
| 5  | 3  | 2  | 2  | 6  | 80 | 19 |
| 9  | 7  | 1  | 4  | 11 | 11 | 1  |
| 11 | 14 | 12 | 10 | 4  | 47 | 11 |
| 3  | 1  | 3  | 1  | 6  | 44 | 27 |
| 13 | 3  | 1  | 2  | 3  | 52 | 5  |
| 13 | 0  | 0  | 0  | 1  | 1  | 0  |
| 8  | 5  | 0  | 10 | 10 | 9  | 28 |
| 6  | 7  | 5  | 1  | 11 | 45 | 30 |
| 23 | 7  | 14 | 6  | 7  | 80 | 11 |
| 14 | 21 | 11 | 4  | 1  | 49 | 17 |
| 17 | 1  | 4  | 3  | 6  | 14 | 6  |
| 30 | 1  | 0  | 0  | 0  | 27 | 3  |
| 3  | 9  | 10 | 2  | 4  | 42 | 15 |
| 4  | 6  | 3  | 1  | 0  | 60 | 56 |
| 5  | 8  | 1  | 5  | 3  | 25 | 15 |
| 12 | 4  | 0  | 2  | 1  | 46 | 2  |
| 34 | 28 | 0  | 10 | 7  | 32 | 12 |
| 9  | 4  | 0  | 1  | 8  | 41 | 18 |
| 7  | 10 | 3  | 4  | 0  | 61 | 38 |
| 5  | 7  | 2  | 5  | 7  | 21 | 26 |
| 7  | 1  | 2  | 0  | 1  | 40 | 3  |
| 3  | 5  | 4  | 1  | 4  | 51 | 12 |
| 8  | 2  | 0  | 2  | 4  | 97 | 15 |
| 4  | 5  | 3  | 0  | 5  | 24 | 11 |
| 0  | 2  | 1  | 1  | 5  | 66 | 29 |
| 13 | 7  | 1  | 3  | 6  | 65 | 16 |
| 15 | 13 | 0  | 3  | 8  | 72 | 17 |
| 24 | 8  | 1  | 8  | 3  | 5  | 1  |
| 2  | 2  | 1  | 0  | 10 | 56 | 44 |
| 2  | 0  | 0  | 0  | 2  | 38 | 9  |
| 10 | 1  | 0  | 2  | 2  | 36 | 8  |
| 12 | 6  | 0  | 1  | 2  | 50 | 13 |
| 2  | 1  | 0  | 0  | 0  | 51 | 5  |
| 0  | 2  | 0  | 0  | 0  | 1  | 0  |
| 5  | 6  | 1  | 1  | 9  | 31 | 8  |
| 18 | 2  | 1  | 1  | 12 | 2  | 2  |
| 4  | 5  | 0  | 0  | 2  | 51 | 24 |
| 7  | 4  | 0  | 6  | 2  | 38 | 18 |
| 2  | 4  | 2  | 1  | 6  | 34 | 25 |
| 18 | 3  | 0  | 1  | 8  | 26 | 2  |
| 3  | 0  | 0  | 0  | 1  | 24 | 7  |
| 3  | 0  | 0  | 0  | 1  | 15 | 8  |
| 0  | 1  | 0  | 0  | 1  | 44 | 8  |
| 4  | 1  | 6  | 0  | 4  | 34 | 19 |
| 7  | 7  | 1  | 2  | 5  | 23 | 20 |
| 6  | 2  | 1  | 6  | 7  | 5  | 10 |
| 7  | 8  | 5  | 8  | 1  | 19 | 5  |
| 1  | 0  | 0  | 0  | 3  | 3  | 0  |
| 2  | 4  | 1  | 0  | 0  | 39 | 14 |
| 2  | 0  | 0  | 0  | 0  | 12 | 2  |
| 0  | 9  | 1  | 3  | 1  | 12 | 10 |
| 4  | 2  | 0  | 0  | 0  | 9  | 5  |
| 8  | 1  | 0  | 1  | 9  | 31 | 14 |
| 14 | 2  | 0  | 2  | 1  | 28 | 7  |
| 2  | 3  | 0  | 0  | 3  | 27 | 9  |
| 5  | 3  | 1  | 1  | 2  | 22 | 7  |

|    |    |   |   |    |    |    |
|----|----|---|---|----|----|----|
| 2  | 1  | 0 | 0 | 0  | 32 | 8  |
| 14 | 3  | 0 | 2 | 7  | 8  | 0  |
| 11 | 9  | 0 | 2 | 1  | 19 | 12 |
| 11 | 9  | 0 | 2 | 1  | 19 | 12 |
| 1  | 0  | 4 | 2 | 1  | 12 | 5  |
| 3  | 0  | 1 | 1 | 4  | 47 | 19 |
| 0  | 1  | 2 | 0 | 3  | 8  | 9  |
| 2  | 0  | 1 | 0 | 1  | 12 | 6  |
| 5  | 3  | 0 | 2 | 4  | 25 | 3  |
| 3  | 0  | 0 | 2 | 3  | 65 | 5  |
| 5  | 6  | 3 | 6 | 3  | 4  | 7  |
| 1  | 2  | 0 | 1 | 3  | 16 | 9  |
| 11 | 2  | 0 | 0 | 1  | 3  | 5  |
| 12 | 1  | 0 | 2 | 11 | 36 | 18 |
| 11 | 2  | 0 | 0 | 4  | 19 | 8  |
| 0  | 0  | 0 | 0 | 1  | 34 | 7  |
| 3  | 5  | 1 | 1 | 5  | 12 | 14 |
| 0  | 0  | 0 | 0 | 1  | 0  | 1  |
| 3  | 3  | 1 | 0 | 3  | 25 | 9  |
| 16 | 3  | 0 | 1 | 2  | 4  | 2  |
| 1  | 1  | 0 | 0 | 2  | 10 | 10 |
| 1  | 2  | 4 | 0 | 3  | 16 | 17 |
| 15 | 3  | 0 | 1 | 1  | 1  | 2  |
| 2  | 1  | 1 | 1 | 6  | 6  | 2  |
| 3  | 0  | 0 | 0 | 5  | 9  | 4  |
| 0  | 4  | 1 | 1 | 1  | 7  | 2  |
| 2  | 0  | 1 | 0 | 3  | 21 | 4  |
| 0  | 1  | 0 | 0 | 0  | 3  | 4  |
| 3  | 0  | 0 | 0 | 0  | 7  | 1  |
| 1  | 1  | 0 | 0 | 2  | 25 | 11 |
| 2  | 0  | 1 | 1 | 1  | 28 | 6  |
| 0  | 0  | 0 | 0 | 1  | 27 | 3  |
| 4  | 2  | 0 | 0 | 3  | 7  | 5  |
| 0  | 0  | 0 | 0 | 0  | 0  | 1  |
| 5  | 4  | 1 | 2 | 4  | 11 | 20 |
| 2  | 2  | 0 | 2 | 1  | 13 | 6  |
| 4  | 72 | 0 | 0 | 0  | 7  | 9  |
| 2  | 0  | 1 | 1 | 0  | 15 | 6  |
| 9  | 1  | 3 | 2 | 0  | 5  | 5  |
| 4  | 4  | 4 | 2 | 6  | 21 | 7  |
| 3  | 0  | 3 | 0 | 3  | 24 | 11 |
| 2  | 1  | 1 | 0 | 2  | 16 | 7  |
| 3  | 3  | 1 | 2 | 0  | 7  | 1  |
| 5  | 0  | 0 | 2 | 1  | 22 | 9  |
| 4  | 2  | 1 | 2 | 1  | 19 | 5  |
| 4  | 3  | 0 | 0 | 2  | 20 | 1  |
| 2  | 1  | 0 | 2 | 1  | 13 | 3  |
| 2  | 0  | 0 | 0 | 3  | 18 | 8  |
| 0  | 2  | 0 | 1 | 1  | 0  | 0  |
| 4  | 0  | 0 | 0 | 2  | 3  | 6  |
| 4  | 5  | 0 | 3 | 1  | 2  | 0  |
| 0  | 1  | 0 | 1 | 0  | 19 | 14 |
| 2  | 2  | 2 | 1 | 0  | 12 | 11 |
| 0  | 0  | 0 | 0 | 0  | 17 | 6  |
| 2  | 1  | 0 | 0 | 1  | 7  | 3  |
| 7  | 0  | 0 | 2 | 1  | 6  | 3  |
| 2  | 0  | 6 | 3 | 3  | 9  | 4  |
| 2  | 1  | 0 | 1 | 0  | 8  | 3  |
| 2  | 0  | 1 | 1 | 1  | 16 | 4  |

|   |   |   |   |    |    |    |
|---|---|---|---|----|----|----|
| 2 | 0 | 0 | 0 | 0  | 7  | 3  |
| 0 | 3 | 0 | 0 | 0  | 11 | 1  |
| 3 | 0 | 1 | 1 | 3  | 12 | 2  |
| 1 | 0 | 0 | 0 | 0  | 32 | 7  |
| 1 | 0 | 5 | 0 | 0  | 10 | 7  |
| 5 | 3 | 0 | 0 | 0  | 8  | 1  |
| 0 | 0 | 0 | 0 | 1  | 14 | 5  |
| 2 | 0 | 0 | 0 | 0  | 9  | 3  |
| 1 | 1 | 0 | 0 | 0  | 10 | 4  |
| 4 | 2 | 0 | 0 | 0  | 36 | 12 |
| 2 | 0 | 0 | 0 | 0  | 10 | 0  |
| 0 | 1 | 2 | 0 | 0  | 12 | 4  |
| 4 | 3 | 0 | 3 | 1  | 3  | 0  |
| 2 | 2 | 0 | 0 | 1  | 1  | 1  |
| 2 | 0 | 0 | 0 | 0  | 13 | 2  |
| 3 | 2 | 3 | 1 | 3  | 4  | 7  |
| 0 | 2 | 4 | 0 | 1  | 18 | 15 |
| 2 | 1 | 1 | 0 | 0  | 13 | 7  |
| 2 | 1 | 0 | 1 | 0  | 14 | 10 |
| 2 | 0 | 0 | 1 | 1  | 4  | 0  |
| 1 | 1 | 0 | 0 | 1  | 17 | 3  |
| 0 | 1 | 0 | 1 | 2  | 2  | 1  |
| 0 | 2 | 1 | 0 | 1  | 15 | 2  |
| 0 | 0 | 0 | 0 | 0  | 9  | 0  |
| 1 | 3 | 1 | 0 | 1  | 14 | 5  |
| 3 | 2 | 0 | 4 | 0  | 5  | 0  |
| 0 | 0 | 0 | 0 | 4  | 0  | 2  |
| 1 | 0 | 2 | 0 | 0  | 19 | 2  |
| 3 | 0 | 0 | 0 | 1  | 2  | 2  |
| 0 | 0 | 2 | 0 | 0  | 13 | 4  |
| 1 | 0 | 0 | 0 | 2  | 16 | 4  |
| 3 | 0 | 0 | 0 | 0  | 10 | 2  |
| 0 | 0 | 0 | 1 | 0  | 1  | 0  |
| 2 | 2 | 1 | 0 | 1  | 24 | 5  |
| 6 | 2 | 0 | 1 | 4  | 1  | 1  |
| 0 | 1 | 0 | 0 | 2  | 10 | 2  |
| 0 | 1 | 0 | 0 | 1  | 3  | 4  |
| 3 | 0 | 2 | 0 | 0  | 30 | 2  |
| 1 | 0 | 0 | 0 | 0  | 0  | 0  |
| 3 | 4 | 0 | 0 | 1  | 3  | 5  |
| 2 | 6 | 1 | 1 | 0  | 12 | 2  |
| 0 | 0 | 0 | 0 | 0  | 14 | 5  |
| 1 | 0 | 0 | 0 | 0  | 2  | 3  |
| 1 | 2 | 0 | 0 | 1  | 18 | 10 |
| 3 | 2 | 2 | 1 | 0  | 12 | 2  |
| 1 | 1 | 0 | 0 | 0  | 1  | 1  |
| 0 | 0 | 0 | 0 | 1  | 5  | 3  |
| 2 | 0 | 1 | 4 | 0  | 2  | 0  |
| 2 | 0 | 0 | 0 | 1  | 4  | 2  |
| 3 | 1 | 0 | 0 | 0  | 7  | 6  |
| 2 | 0 | 0 | 0 | 1  | 19 | 6  |
| 1 | 0 | 0 | 0 | 0  | 3  | 2  |
| 3 | 0 | 1 | 2 | 21 | 15 | 4  |
| 0 | 0 | 0 | 2 | 0  | 1  | 1  |
| 0 | 1 | 1 | 0 | 2  | 5  | 1  |
| 2 | 0 | 0 | 0 | 0  | 6  | 5  |
| 1 | 1 | 0 | 0 | 0  | 2  | 2  |
| 1 | 1 | 0 | 1 | 0  | 11 | 2  |
| 1 | 0 | 0 | 1 | 0  | 3  | 5  |



|   |   |   |   |   |    |   |
|---|---|---|---|---|----|---|
| 2 | 0 | 1 | 0 | 2 | 6  | 4 |
| 1 | 2 | 0 | 0 | 0 | 9  | 1 |
| 4 | 2 | 0 | 0 | 0 | 14 | 3 |
| 1 | 0 | 0 | 0 | 0 | 0  | 0 |
| 2 | 2 | 0 | 1 | 0 | 6  | 4 |
| 0 | 1 | 3 | 1 | 1 | 3  | 5 |
| 2 | 0 | 1 | 1 | 0 | 0  | 0 |
| 2 | 0 | 0 | 0 | 0 | 1  | 1 |
| 1 | 0 | 0 | 0 | 2 | 2  | 0 |
| 1 | 0 | 0 | 0 | 0 | 9  | 4 |
| 0 | 0 | 0 | 0 | 0 | 19 | 3 |
| 8 | 1 | 0 | 1 | 0 | 1  | 0 |
| 1 | 0 | 0 | 0 | 2 | 6  | 1 |
| 0 | 1 | 1 | 0 | 0 | 3  | 0 |
| 3 | 1 | 0 | 0 | 0 | 0  | 0 |
| 0 | 0 | 0 | 0 | 0 | 2  | 1 |
| 0 | 0 | 1 | 1 | 0 | 4  | 2 |
| 4 | 0 | 0 | 1 | 0 | 5  | 5 |
| 0 | 0 | 0 | 0 | 0 | 5  | 7 |
| 1 | 0 | 0 | 0 | 1 | 11 | 2 |
| 4 | 0 | 0 | 0 | 0 | 10 | 2 |
| 5 | 0 | 0 | 2 | 0 | 8  | 1 |
| 1 | 0 | 0 | 0 | 0 | 0  | 0 |
| 4 | 2 | 0 | 0 | 0 | 2  | 2 |
| 1 | 0 | 0 | 0 | 0 | 7  | 0 |
| 0 | 1 | 0 | 0 | 0 | 1  | 1 |
| 0 | 0 | 0 | 0 | 1 | 13 | 8 |
| 0 | 0 | 0 | 0 | 0 | 1  | 0 |
| 2 | 2 | 0 | 0 | 0 | 5  | 3 |
| 0 | 0 | 0 | 0 | 0 | 3  | 2 |
| 0 | 1 | 0 | 0 | 0 | 2  | 0 |
| 1 | 0 | 0 | 0 | 0 | 11 | 0 |
| 4 | 0 | 0 | 0 | 0 | 3  | 0 |
| 0 | 0 | 0 | 0 | 0 | 0  | 3 |
| 1 | 2 | 0 | 3 | 0 | 14 | 6 |
| 0 | 1 | 0 | 0 | 0 | 3  | 0 |
| 1 | 5 | 1 | 9 | 0 | 1  | 2 |
| 1 | 0 | 0 | 0 | 0 | 4  | 0 |
| 0 | 0 | 0 | 0 | 0 | 2  | 5 |
| 0 | 0 | 0 | 0 | 0 | 22 | 1 |
| 0 | 0 | 0 | 0 | 1 | 0  | 1 |
| 0 | 0 | 0 | 0 | 0 | 8  | 2 |
| 1 | 2 | 0 | 0 | 0 | 0  | 0 |
| 0 | 0 | 0 | 0 | 0 | 0  | 0 |
| 0 | 1 | 0 | 0 | 0 | 1  | 2 |
| 0 | 0 | 1 | 1 | 0 | 3  | 2 |
| 0 | 0 | 0 | 0 | 0 | 4  | 6 |
| 2 | 0 | 0 | 0 | 0 | 1  | 0 |
| 0 | 3 | 1 | 0 | 0 | 3  | 0 |
| 0 | 0 | 0 | 0 | 0 | 2  | 0 |
| 1 | 0 | 0 | 1 | 0 | 0  | 2 |
| 0 | 0 | 0 | 0 | 0 | 0  | 0 |
| 0 | 0 | 0 | 0 | 0 | 0  | 0 |
| 1 | 0 | 0 | 0 | 0 | 6  | 0 |
| 1 | 2 | 0 | 0 | 0 | 0  | 1 |
| 1 | 0 | 0 | 0 | 0 | 2  | 2 |
| 1 | 0 | 0 | 0 | 1 | 2  | 2 |
| 0 | 0 | 0 | 0 | 0 | 2  | 1 |
| 0 | 0 | 0 | 0 | 0 | 0  | 0 |

|   |   |   |   |   |    |   |
|---|---|---|---|---|----|---|
| 0 | 0 | 0 | 1 | 1 | 1  | 0 |
| 1 | 0 | 0 | 1 | 0 | 2  | 2 |
| 1 | 0 | 0 | 0 | 0 | 1  | 6 |
| 0 | 0 | 0 | 0 | 1 | 2  | 1 |
| 0 | 0 | 0 | 0 | 0 | 9  | 2 |
| 0 | 0 | 0 | 0 | 0 | 2  | 0 |
| 0 | 0 | 0 | 0 | 0 | 0  | 0 |
| 0 | 0 | 0 | 0 | 0 | 2  | 0 |
| 0 | 0 | 0 | 0 | 1 | 4  | 0 |
| 0 | 0 | 0 | 0 | 0 | 1  | 0 |
| 1 | 1 | 0 | 0 | 0 | 5  | 2 |
| 0 | 0 | 0 | 0 | 0 | 0  | 1 |
| 0 | 1 | 0 | 0 | 0 | 4  | 0 |
| 0 | 1 | 0 | 0 | 0 | 1  | 2 |
| 0 | 0 | 0 | 0 | 0 | 2  | 0 |
| 2 | 0 | 0 | 1 | 1 | 6  | 3 |
| 1 | 1 | 0 | 1 | 0 | 1  | 1 |
| 0 | 1 | 0 | 0 | 0 | 1  | 0 |
| 1 | 0 | 0 | 0 | 0 | 5  | 1 |
| 0 | 0 | 0 | 0 | 0 | 5  | 2 |
| 1 | 1 | 0 | 0 | 1 | 3  | 0 |
| 0 | 0 | 0 | 0 | 0 | 0  | 0 |
| 0 | 0 | 0 | 0 | 1 | 4  | 4 |
| 0 | 1 | 0 | 0 | 1 | 0  | 1 |
| 0 | 0 | 0 | 0 | 0 | 2  | 0 |
| 0 | 0 | 0 | 0 | 1 | 7  | 3 |
| 0 | 0 | 0 | 0 | 1 | 0  | 0 |
| 0 | 0 | 0 | 0 | 1 | 1  | 0 |
| 0 | 2 | 0 | 0 | 0 | 3  | 2 |
| 0 | 0 | 0 | 0 | 0 | 2  | 1 |
| 0 | 1 | 0 | 0 | 0 | 1  | 0 |
| 1 | 2 | 0 | 0 | 1 | 1  | 1 |
| 0 | 0 | 0 | 1 | 0 | 1  | 0 |
| 0 | 0 | 0 | 0 | 2 | 2  | 0 |
| 2 | 0 | 0 | 0 | 0 | 2  | 1 |
| 0 | 0 | 0 | 0 | 1 | 0  | 1 |
| 3 | 0 | 0 | 0 | 0 | 1  | 1 |
| 0 | 0 | 0 | 0 | 0 | 4  | 1 |
| 0 | 0 | 0 | 0 | 0 | 2  | 0 |
| 0 | 0 | 0 | 0 | 0 | 3  | 2 |
| 0 | 0 | 0 | 0 | 0 | 12 | 0 |
| 0 | 0 | 0 | 0 | 0 | 6  | 1 |
| 3 | 1 | 0 | 0 | 0 | 3  | 1 |
| 0 | 1 | 0 | 0 | 0 | 3  | 1 |
| 0 | 0 | 0 | 0 | 0 | 2  | 0 |
| 0 | 0 | 0 | 0 | 0 | 1  | 0 |
| 0 | 0 | 0 | 0 | 0 | 2  | 1 |
| 1 | 0 | 0 | 0 | 0 | 1  | 1 |
| 0 | 0 | 0 | 1 | 0 | 2  | 1 |
| 0 | 0 | 0 | 1 | 0 | 2  | 1 |
| 1 | 0 | 0 | 0 | 0 | 2  | 4 |
| 0 | 0 | 0 | 0 | 0 | 0  | 1 |
| 0 | 0 | 0 | 0 | 0 | 0  | 0 |
| 1 | 0 | 0 | 0 | 0 | 3  | 0 |
| 0 | 0 | 0 | 0 | 0 | 0  | 3 |
| 0 | 0 | 1 | 0 | 2 | 1  | 0 |
| 2 | 0 | 0 | 0 | 1 | 2  | 1 |
| 0 | 1 | 0 | 0 | 0 | 0  | 0 |
| 1 | 1 | 0 | 0 | 0 | 0  | 0 |



|        |        |        |        |        |         |        |
|--------|--------|--------|--------|--------|---------|--------|
| 29     | 30     | 31     | 32     | 33     | 34      | 35     |
| 2      | 3      | 4      | 5      | 6      | 7       | 8      |
| CHR_NP | CHR_NP | CHR_NP | CHR_NP | CHR_NP | CHR_NP  | CHR_NP |
| A_13   | A_14   | A_15   | A_17   | B_30   | B_33    | C_2    |
| 371228 | 359180 | 111957 | 117100 | 148505 | 1922117 | 685397 |
| CHR_NP | CHR_NP | CHR_NP | CHR_NP | CHR_NP | CHR_NP  | CHR_NP |
| 13.17  | 15.91  | 15.47  | 6.54   | 1.16   | 16.96   | 15.55  |
| 3.20   | 4.64   | 5.99   | 8.55   | 6.37   | 1.39    | 2.58   |
| 1.08   | 0.59   | 0.38   | 0.54   | 1.55   | 0.90    | 1.29   |
| 1.42   | 1.11   | 2.15   | 1.73   | 4.58   | 1.77    | 1.48   |
| 0.83   | 0.62   | 0.57   | 0.57   | 1.02   | 3.13    | 2.53   |
| 0.96   | 0.55   | 0.20   | 1.06   | 5.05   | 0.37    | 0.72   |
| 1.76   | 0.62   | 0.28   | 1.04   | 3.61   | 0.72    | 0.53   |
| 0.14   | 0.26   | 0.05   | 0.63   | 0.51   | 0.08    | 0.42   |
| 0.55   | 0.38   | 0.12   | 0.30   | 0.17   | 0.25    | 0.23   |
| 1.18   | 1.43   | 1.16   | 2.07   | 0.82   | 0.70    | 1.13   |
| 0.50   | 0.50   | 0.67   | 0.73   | 0.24   | 0.32    | 0.39   |
| 0.28   | 0.22   | 0.37   | 0.26   | 0.41   | 0.45    | 0.44   |
| 0.38   | 0.16   | 0.13   | 0.31   | 0.57   | 0.16    | 0.13   |
| 0.17   | 0.24   | 0.66   | 0.26   | 0.46   | 0.49    | 0.67   |
| 0.44   | 0.20   | 0.06   | 0.52   | 0.57   | 0.06    | 0.07   |
| 0.11   | 0.04   | 0.03   | 0.02   | 0.03   | 0.56    | 0.15   |
| 0.27   | 0.11   | 0.03   | 0.28   | 0.70   | 0.08    | 0.05   |
| 0.20   | 0.23   | 0.21   | 0.34   | 0.33   | 0.14    | 0.24   |
| 0.33   | 0.17   | 0.07   | 0.33   | 0.22   | 0.11    | 0.14   |
| 0.87   | 0.55   | 0.32   | 1.01   | 0.10   | 0.25    | 0.17   |
| 0.12   | 0.13   | 0.10   | 0.14   | 0.15   | 0.17    | 0.17   |
| 0.12   | 0.17   | 0.27   | 0.15   | 0.08   | 0.16    | 0.20   |
| 0.50   | 0.19   | 0.06   | 0.33   | 0.05   | 0.14    | 0.08   |
| 0.21   | 0.10   | 0.02   | 0.14   | 0.58   | 0.17    | 0.17   |
| 0.61   | 0.32   | 0.03   | 1.21   | 0.15   | 0.02    | 0.02   |
| 0.18   | 0.09   | 0.04   | 0.04   | 0.02   | 0.15    | 0.10   |
| 0.05   | 0.05   | 0.17   | 0.04   | 0.09   | 0.12    | 0.12   |
| 0.10   | 0.25   | 0.16   | 0.54   | 0.05   | 0.05    | 0.12   |
| 0.12   | 0.09   | 0.10   | 0.17   | 0.33   | 0.03    | 0.04   |
| 0.15   | 0.09   | 0.14   | 0.14   | 0.03   | 0.09    | 0.06   |
| 0.10   | 0.05   | 0.02   | 0.11   | 0.17   | 0.10    | 0.14   |
| 0.04   | 0.02   | 0.05   | 0.05   | 0.16   | 0.10    | 0.08   |
| 0.09   | 0.03   | 0.01   | 0.06   | 0.08   | 0.04    | 0.04   |
| 0.11   | 0.02   | 0.01   | 0.09   | 0.06   | 0.05    | 0.08   |
| 0.08   | 0.06   | 0.06   | 0.12   | 0.30   | 0.03    | 0.04   |
| 0.05   | 0.09   | 0.23   | 0.10   | 0.93   | 0.16    | 0.41   |
| 0.24   | 0.25   | 0.20   | 0.65   | 0.25   | 0.04    | 0.09   |
| 0.34   | 0.26   | 0.11   | 0.73   | 0.20   | 0.02    | 0.03   |
| 0.27   | 0.12   | 0.26   | 0.30   | 0.18   | 0.12    | 0.13   |
| 0.04   | 0.01   | 0.02   | 0.04   | 0.03   | 0.09    | 0.03   |
| 0.08   | 0.04   | 0.09   | 0.05   | 0.14   | 0.23    | 0.16   |
| 0.03   | 0.02   | 0.02   | 0.03   | 0.02   | 0.04    | 0.05   |
| 0.05   | 0.05   | 0.14   | 0.05   | 0.14   | 0.08    | 0.08   |
| 0.05   | 0.06   | 0.03   | 0.26   | 0.14   | 0.01    | 0.03   |
| 0.07   | 0.07   | 0.03   | 0.09   | 0.07   | 0.02    | 0.06   |
| 0.07   | 0.03   | 0.03   | 0.05   | 0.02   | 0.06    | 0.05   |
| 0.06   | 0.03   | 0.02   | 0.06   | 0.03   | 0.02    | 0.02   |
| 0.03   | 0.03   | 0.04   | 0.02   | 0.02   | 0.08    | 0.08   |
| 0.00   | 0.00   | 0.00   | 0.00   | 0.01   | 0.00    | 0.00   |
| 0.07   | 0.03   | 0.00   | 0.03   | 0.01   | 0.07    | 0.04   |
| 0.06   | 0.03   | 0.17   | 0.09   | 0.03   | 0.02    | 0.03   |
| 0.04   | 0.02   | 0.00   | 0.03   | 0.20   | 0.03    | 0.08   |

|      |      |      |      |      |      |      |
|------|------|------|------|------|------|------|
| 0.03 | 0.03 | 0.06 | 0.04 | 0.04 | 0.04 | 0.09 |
| 0.13 | 0.08 | 0.02 | 0.10 | 0.02 | 0.04 | 0.02 |
| 0.05 | 0.01 | 0.00 | 0.00 | 0.00 | 0.05 | 0.02 |
| 0.01 | 0.00 | 0.00 | 0.01 | 0.00 | 0.00 | 0.00 |
| 0.02 | 0.02 | 0.02 | 0.02 | 0.09 | 0.03 | 0.05 |
| 0.01 | 0.01 | 0.00 | 0.01 | 0.03 | 0.06 | 0.03 |
| 0.03 | 0.03 | 0.02 | 0.02 | 0.02 | 0.02 | 0.02 |
| 0.04 | 0.03 | 0.07 | 0.03 | 0.43 | 0.01 | 0.01 |
| 0.02 | 0.01 | 0.01 | 0.02 | 0.04 | 0.03 | 0.04 |
| 0.02 | 0.02 | 0.00 | 0.03 | 0.01 | 0.03 | 0.03 |
| 0.01 | 0.01 | 0.00 | 0.04 | 0.02 | 0.00 | 0.00 |
| 0.00 | 0.00 | 0.00 | 0.00 | 0.00 | 0.00 | 0.00 |
| 0.01 | 0.03 | 0.16 | 0.03 | 0.01 | 0.03 | 0.02 |
| 0.02 | 0.02 | 0.02 | 0.02 | 0.04 | 0.01 | 0.01 |
| 0.01 | 0.00 | 0.00 | 0.01 | 0.01 | 0.01 | 0.04 |
| 0.01 | 0.00 | 0.01 | 0.03 | 0.03 | 0.00 | 0.01 |
| 0.01 | 0.01 | 0.00 | 0.01 | 0.03 | 0.02 | 0.04 |
| 0.02 | 0.13 | 0.21 | 0.18 | 0.01 | 0.01 | 0.02 |
| 0.01 | 0.01 | 0.01 | 0.01 | 0.03 | 0.04 | 0.03 |
| 0.01 | 0.02 | 0.04 | 0.01 | 0.02 | 0.02 | 0.02 |
| 0.03 | 0.01 | 0.00 | 0.04 | 0.02 | 0.00 | 0.00 |
| 0.02 | 0.03 | 0.01 | 0.01 | 0.00 | 0.01 | 0.01 |
| 0.02 | 0.01 | 0.00 | 0.01 | 0.04 | 0.01 | 0.01 |
| 0.02 | 0.01 | 0.02 | 0.02 | 0.01 | 0.02 | 0.01 |
| 0.02 | 0.02 | 0.00 | 0.00 | 0.00 | 0.01 | 0.01 |
| 0.02 | 0.02 | 0.08 | 0.04 | 0.10 | 0.00 | 0.00 |
| 0.01 | 0.01 | 0.01 | 0.00 | 0.02 | 0.02 | 0.02 |
| 0.01 | 0.00 | 0.01 | 0.00 | 0.03 | 0.01 | 0.02 |
| 0.01 | 0.01 | 0.01 | 0.01 | 0.03 | 0.01 | 0.01 |
| 0.01 | 0.00 | 0.00 | 0.00 | 0.00 | 0.02 | 0.02 |
| 0.02 | 0.02 | 0.07 | 0.02 | 0.03 | 0.01 | 0.02 |
| 0.01 | 0.00 | 0.00 | 0.01 | 0.00 | 0.00 | 0.01 |
| 0.02 | 0.01 | 0.01 | 0.04 | 0.01 | 0.01 | 0.01 |
| 0.00 | 0.00 | 0.00 | 0.00 | 0.01 | 0.01 | 0.03 |
| 0.01 | 0.01 | 0.03 | 0.01 | 0.01 | 0.02 | 0.02 |
| 0.01 | 0.00 | 0.00 | 0.01 | 0.02 | 0.00 | 0.00 |
| 0.02 | 0.01 | 0.00 | 0.01 | 0.02 | 0.01 | 0.01 |
| 0.01 | 0.00 | 0.01 | 0.01 | 0.04 | 0.00 | 0.00 |
| 0.01 | 0.01 | 0.00 | 0.02 | 0.00 | 0.00 | 0.00 |
| 0.00 | 0.00 | 0.00 | 0.00 | 0.00 | 0.00 | 0.00 |
| 0.01 | 0.00 | 0.00 | 0.00 | 0.00 | 0.01 | 0.00 |
| 0.00 | 0.00 | 0.00 | 0.00 | 0.01 | 0.00 | 0.00 |
| 0.00 | 0.00 | 0.00 | 0.00 | 0.00 | 0.00 | 0.00 |
| 0.01 | 0.00 | 0.00 | 0.00 | 0.02 | 0.00 | 0.00 |
| 0.01 | 0.00 | 0.01 | 0.01 | 0.01 | 0.01 | 0.01 |
| 0.00 | 0.01 | 0.01 | 0.01 | 0.00 | 0.01 | 0.01 |
| 0.02 | 0.01 | 0.01 | 0.01 | 0.00 | 0.00 | 0.00 |
| 0.00 | 0.00 | 0.00 | 0.00 | 0.01 | 0.00 | 0.00 |
| 0.00 | 0.01 | 0.00 | 0.01 | 0.01 | 0.01 | 0.02 |
| 0.00 | 0.00 | 0.00 | 0.01 | 0.01 | 0.00 | 0.00 |
| 0.01 | 0.00 | 0.00 | 0.00 | 0.01 | 0.00 | 0.00 |
| 0.01 | 0.01 | 0.01 | 0.02 | 0.02 | 0.00 | 0.00 |
| 0.01 | 0.01 | 0.00 | 0.01 | 0.01 | 0.00 | 0.01 |
| 0.00 | 0.00 | 0.00 | 0.01 | 0.00 | 0.00 | 0.00 |
| 0.00 | 0.00 | 0.00 | 0.00 | 0.01 | 0.01 | 0.02 |
| 0.01 | 0.00 | 0.01 | 0.01 | 0.02 | 0.00 | 0.01 |
| 0.00 | 0.00 | 0.00 | 0.00 | 0.01 | 0.00 | 0.00 |
| 0.00 | 0.00 | 0.00 | 0.00 | 0.01 | 0.00 | 0.00 |
| 0.01 | 0.00 | 0.00 | 0.01 | 0.00 | 0.00 | 0.01 |









|       |       |       |       |       |       |       |
|-------|-------|-------|-------|-------|-------|-------|
| -0.08 | -0.41 | -0.94 | -0.57 | -0.83 | -0.67 | -0.71 |
| 1.07  | 1.73  | 1.03  | 3.37  | 0.17  | -0.15 | 0.94  |
| 0.10  | 0.12  | 0.76  | 0.97  | -0.85 | -0.58 | -0.29 |
| -1.90 | -2.45 | -1.11 | -2.10 | -0.74 | -0.37 | -0.43 |
| 0.14  | -1.15 | -1.33 | -0.25 | 1.21  | -1.15 | -1.28 |
| -1.69 | -1.30 | 1.11  | -1.17 | -0.06 | 0.14  | 1.18  |
| 1.03  | -0.09 | -0.74 | 1.39  | 1.59  | -0.73 | -0.67 |
| -0.80 | -1.13 | -1.15 | -1.23 | -1.14 | 1.15  | -0.63 |
| 0.70  | -0.30 | -0.80 | 0.77  | 3.42  | -0.46 | -0.65 |
| -0.14 | 0.20  | -0.06 | 1.21  | 1.17  | -0.75 | 0.28  |
| 1.37  | -0.14 | -1.00 | 1.28  | 0.34  | -0.63 | -0.36 |
| 6.39  | 3.15  | 0.86  | 7.78  | -1.27 | 0.17  | -0.58 |
| -0.55 | -0.50 | -0.84 | -0.24 | -0.17 | 0.23  | 0.20  |
| -0.53 | 0.28  | 1.77  | 0.04  | -1.04 | 0.09  | 0.76  |
| 4.72  | 0.93  | -0.75 | 2.64  | -0.90 | 0.24  | -0.44 |
| 0.89  | -0.17 | -0.97 | 0.21  | 4.39  | 0.45  | 0.49  |
| 2.81  | 1.13  | -0.57 | 6.40  | 0.09  | -0.67 | -0.67 |
| 1.20  | -0.52 | -1.39 | -1.40 | -1.82 | 0.62  | -0.26 |
| -1.48 | -1.36 | 0.52  | -1.57 | -0.75 | -0.26 | -0.32 |
| -0.11 | 1.28  | 0.47  | 4.08  | -0.61 | -0.58 | 0.02  |
| 0.30  | -0.31 | -0.17 | 1.23  | 4.25  | -1.48 | -1.31 |
| 1.01  | -0.19 | 0.86  | 0.85  | -1.74 | -0.20 | -0.94 |
| 0.33  | -0.83 | -1.55 | 0.49  | 1.79  | 0.32  | 1.10  |
| -1.63 | -1.96 | -1.42 | -1.43 | 0.82  | -0.47 | -0.80 |
| 0.41  | -0.49 | -0.70 | 0.03  | 0.25  | -0.33 | -0.35 |
| 0.21  | -0.27 | -0.34 | 0.11  | -0.10 | -0.10 | 0.04  |
| -0.27 | -0.72 | -0.69 | 0.49  | 4.56  | -1.49 | -1.30 |
| -0.57 | -0.34 | 0.53  | -0.24 | 4.82  | 0.13  | 1.63  |
| 1.54  | 1.58  | 1.04  | 6.29  | 1.58  | -0.84 | -0.26 |
| 2.56  | 1.77  | 0.19  | 6.51  | 1.13  | -0.75 | -0.69 |
| 2.06  | 0.23  | 1.88  | 2.43  | 0.96  | 0.23  | 0.33  |
| -0.44 | -0.72 | -0.65 | -0.45 | -0.56 | -0.09 | -0.55 |
| 0.08  | -0.63 | 0.23  | -0.55 | 1.34  | 3.08  | 1.82  |
| -1.15 | -1.50 | -1.58 | -1.12 | -1.61 | -0.80 | -0.59 |
| -0.40 | -0.48 | 2.88  | -0.38 | 3.19  | 0.82  | 0.58  |
| 0.22  | 0.63  | -0.21 | 5.41  | 2.62  | -0.69 | -0.30 |
| 0.10  | 0.13  | -0.65 | 0.65  | 0.24  | -0.85 | -0.11 |
| 1.40  | -0.92 | -1.38 | 0.51  | -1.78 | 1.29  | 0.40  |
| 0.88  | -0.33 | -0.97 | 0.89  | -0.37 | -0.71 | -0.96 |
| -0.70 | -0.66 | -0.39 | -0.92 | -1.09 | 1.03  | 0.94  |
| -0.25 | -0.33 | -0.34 | -0.35 | -0.11 | -0.33 | -0.30 |
| 0.99  | -0.08 | -0.66 | 0.02  | -0.52 | 0.89  | 0.19  |
| 1.59  | -0.32 | 7.26  | 3.08  | -0.27 | -0.77 | -0.37 |
| 0.10  | -0.39 | -0.88 | -0.17 | 4.70  | -0.22 | 1.20  |
| -0.81 | -0.29 | 1.85  | 0.14  | 0.63  | 0.02  | 3.90  |
| 5.47  | 2.51  | -0.58 | 3.78  | -0.43 | 0.68  | -0.35 |
| 1.52  | -1.07 | -1.37 | -1.37 | -1.34 | 1.20  | -0.49 |

|       |       |       |       |       |       |       |
|-------|-------|-------|-------|-------|-------|-------|
| -0.05 | -0.23 | -0.33 | -0.07 | -0.33 | -0.30 | -0.26 |
| -0.31 | -1.03 | -0.97 | -0.42 | 4.83  | 0.16  | 1.49  |
| -0.81 | -1.31 | -1.85 | -1.36 | 0.51  | 3.03  | 0.77  |
| -0.07 | -0.17 | -1.06 | -0.69 | -0.93 | -0.74 | -0.75 |
| -0.10 | -0.31 | 0.66  | -0.23 | 10.28 | -0.91 | -0.87 |
| -0.67 | -1.18 | -1.04 | -0.42 | 1.37  | 0.55  | 0.88  |
| 0.07  | -0.53 | -1.44 | 0.31  | -0.67 | 0.43  | 0.95  |
| 0.31  | -0.05 | -0.50 | 2.09  | 0.71  | -0.59 | -0.38 |
| -0.16 | -0.25 | -0.24 | -0.20 | -0.11 | -0.23 | -0.17 |
| -0.95 | -0.05 | 7.78  | -0.09 | -1.13 | -0.09 | -0.58 |
| 0.06  | -0.07 | 0.18  | 0.63  | 2.62  | -0.55 | -0.28 |
| -0.31 | -0.67 | -0.80 | -0.05 | 0.13  | -0.38 | 1.87  |
| -0.23 | -0.61 | -0.48 | 1.46  | 1.67  | -0.58 | -0.53 |
| -0.30 | -0.30 | -1.09 | 0.01  | 1.63  | 0.33  | 3.37  |
| -0.13 | 1.30  | 2.34  | 1.93  | -0.33 | -0.35 | -0.20 |
| -0.73 | -0.94 | -0.76 | -0.98 | 0.55  | 1.63  | 0.28  |
| -0.93 | 0.04  | 2.34  | -0.57 | -0.02 | 0.02  | 0.12  |
| 1.54  | 0.41  | -0.51 | 3.02  | 0.99  | -0.78 | -0.70 |
| 0.59  | 1.88  | -0.44 | 0.10  | -1.48 | -0.17 | -0.19 |
| 1.60  | -0.40 | -1.23 | -0.68 | 3.83  | -0.48 | -0.41 |
| 0.01  | -0.81 | 0.08  | 0.39  | -0.66 | -0.02 | -0.34 |
| 1.06  | 0.22  | -1.37 | -1.44 | -1.73 | -0.75 | -0.96 |
| -0.11 | -0.07 | 1.65  | 0.59  | 2.03  | -0.51 | -0.45 |
| -1.10 | -1.14 | -1.10 | -1.26 | 0.42  | 0.45  | -0.20 |
| -0.73 | -1.05 | -0.81 | -1.08 | 1.72  | -0.49 | 0.51  |
| -0.36 | -0.79 | -0.67 | -0.27 | 4.17  | -0.84 | -0.40 |
| -0.75 | -1.36 | -1.51 | -1.63 | -1.59 | 1.04  | 0.77  |
| 0.05  | 0.36  | 4.70  | 0.71  | 1.01  | -0.61 | -0.12 |
| 0.00  | -0.37 | -0.46 | -0.23 | -0.42 | -0.34 | 0.06  |
| 1.41  | 0.42  | -0.30 | 5.02  | 0.29  | -0.38 | -0.26 |
| -1.13 | -1.22 | -1.35 | -1.29 | -0.51 | 0.89  | 2.96  |
| -0.87 | -0.30 | 2.91  | -0.94 | -0.38 | 0.67  | 1.05  |
| 0.34  | -0.58 | -0.77 | 0.10  | 1.59  | -0.63 | -0.69 |
| 3.16  | 0.02  | -0.98 | 0.49  | 3.52  | 1.36  | -0.44 |
| -0.37 | -1.21 | -0.78 | 0.02  | 3.63  | -0.99 | -1.25 |
| -0.71 | 0.63  | -0.99 | 3.75  | -1.49 | -1.23 | -0.97 |
| -0.30 | -0.27 | -0.21 | -0.32 | -0.14 | -0.25 | -0.13 |
| 0.08  | -1.27 | -1.69 | -1.14 | -1.64 | 1.81  | -0.54 |
| -0.66 | -0.73 | -1.05 | -0.63 | -0.02 | -0.82 | -0.66 |
| -0.24 | -0.43 | -0.59 | -0.25 | -0.07 | -0.31 | -0.11 |
| 0.38  | -0.84 | -1.13 | -0.49 | 1.90  | -0.32 | -0.30 |
| -0.16 | -0.90 | -0.21 | -0.56 | -0.59 | 0.18  | 0.25  |
| -0.77 | -0.45 | 0.81  | -0.19 | -1.30 | 0.66  | 1.08  |
| 1.91  | 0.47  | -0.50 | 1.46  | -1.02 | -1.10 | -0.75 |
| -0.36 | -0.50 | -0.61 | -0.34 | 1.18  | -0.56 | -0.49 |
| -0.38 | -0.08 | -0.46 | -0.05 | 0.58  | 1.00  | 2.00  |
| -0.22 | -1.33 | -1.54 | 0.11  | 0.17  | -1.22 | -1.11 |
| -0.04 | -1.27 | -1.36 | -1.30 | -0.41 | -1.09 | -0.93 |

|       |       |       |       |       |       |       |
|-------|-------|-------|-------|-------|-------|-------|
| 0.29  | -0.07 | -0.21 | 1.08  | 0.73  | -0.57 | -0.50 |
| 1.27  | 0.76  | -0.56 | 2.25  | 1.82  | -0.71 | 1.25  |
| 0.23  | 0.16  | -0.39 | 2.14  | -0.03 | -0.37 | -0.12 |
| -0.35 | -0.90 | -0.93 | -0.14 | 2.83  | 1.84  | 4.22  |
| 0.50  | -0.32 | -0.20 | 0.27  | 1.81  | -0.52 | 0.05  |
| -0.15 | -0.65 | -0.82 | -0.27 | 1.79  | -0.29 | 0.13  |
| -0.60 | -0.63 | -1.01 | -0.01 | 1.24  | -0.80 | -0.40 |
| 1.55  | -0.07 | -1.09 | 0.77  | 0.08  | -0.59 | 0.28  |
| -0.17 | -0.88 | -0.16 | -0.90 | -1.42 | 0.37  | -0.13 |
| -0.30 | -0.32 | -0.88 | -0.97 | 0.19  | 2.55  | 8.36  |
| 0.11  | 0.59  | 0.91  | 3.39  | 3.13  | -0.72 | -0.44 |
| -0.45 | -1.21 | -1.37 | -1.15 | -0.43 | -1.09 | -1.18 |
| -0.66 | -1.47 | -0.70 | -0.95 | -0.26 | -0.59 | -0.64 |
| -0.22 | -0.89 | -0.17 | 2.08  | -1.44 | -0.52 | -0.26 |
| 1.02  | -0.86 | -0.98 | 0.75  | 4.41  | -0.46 | -0.52 |
| 1.02  | -0.86 | -0.98 | 0.75  | 4.41  | -0.46 | -0.52 |
| -0.49 | -0.51 | -0.80 | -0.48 | 4.67  | 1.13  | 2.86  |
| -0.80 | -0.96 | -1.17 | -0.96 | -0.77 | 0.71  | 1.95  |
| -0.10 | -0.31 | -0.99 | -0.63 | -1.63 | 1.49  | 1.57  |
| 0.84  | -0.09 | -0.54 | 0.10  | -0.79 | -0.09 | -0.62 |
| 1.50  | 0.91  | -0.69 | 2.19  | -0.47 | -0.25 | -0.22 |
| -0.23 | -0.36 | -0.39 | -0.39 | -0.39 | -0.24 | -0.27 |
| -0.43 | -1.36 | -0.91 | -1.03 | -0.14 | -0.47 | -0.51 |
| -0.11 | -0.55 | -0.96 | -0.52 | -0.69 | -1.11 | -1.04 |
| -0.78 | -0.82 | -1.07 | -0.91 | -1.40 | -0.44 | -0.04 |
| 0.10  | 0.29  | 2.23  | 2.03  | 1.16  | -0.13 | 0.09  |
| -0.45 | -0.69 | -0.75 | -0.68 | 0.36  | 0.89  | 0.33  |
| -0.05 | -0.01 | 0.83  | -0.63 | -0.76 | -0.61 | -0.42 |
| 1.54  | -1.02 | -1.49 | 0.10  | 1.95  | 0.32  | 0.71  |
| 1.23  | -0.20 | -1.12 | 1.36  | 0.79  | -0.82 | -0.89 |
| -0.58 | -0.79 | -0.30 | -0.53 | 2.24  | 0.15  | 0.16  |
| 1.44  | -0.50 | -0.86 | -0.53 | -0.46 | -0.46 | -0.37 |
| -0.84 | -0.68 | -1.24 | -0.22 | -0.78 | 0.36  | 1.97  |

| 26                                                                                       | 27       | 28         | 29       | 30          | 31         | 32        |
|------------------------------------------------------------------------------------------|----------|------------|----------|-------------|------------|-----------|
| 28                                                                                       | 29       | 30         | 31       | 32          | 33         | 34        |
| TACCACAGGGTAC AAAAGCTGGGTTCTTTGGCAATGGTCGAGGAGCTCTCAGTGCATCACATGTAAACATCCTTAGAGGTAGTAGGT |          |            |          |             |            |           |
| miR-140-3p                                                                               | miR-320a | miR-182-5p | miR-151b | miR-148b-3p | miR-30c-5p | let-7d-5p |
| 605614                                                                                   | 549148   | 501331     | 500966   | 497718      | 492626     | 463804    |
| 1.34                                                                                     | 0.58     | -0.73      | -0.90    | 0.26        | -0.41      | -0.85     |
| -1.78                                                                                    | -1.10    | 2.95       | 1.14     | -1.50       | -0.86      | -1.63     |
| 0.50                                                                                     | -0.21    | 0.51       | 1.56     | -0.73       | -0.23      | 0.95      |
| 1.67                                                                                     | -0.33    | -0.18      | -0.43    | -0.75       | -0.87      | 0.18      |
| -1.76                                                                                    | -0.42    | -0.74      | 3.04     | -1.43       | 0.52       | 1.13      |
| -0.75                                                                                    | -0.44    | -0.97      | -0.44    | 0.67        | -1.19      | -0.56     |
| -0.36                                                                                    | 1.04     | -0.81      | -0.76    | 1.48        | -1.14      | -0.06     |
| -0.61                                                                                    | -0.33    | -0.91      | -1.54    | -0.75       | -0.58      | -0.05     |
| -0.73                                                                                    | -0.97    | 0.19       | 0.09     | -0.70       | -0.54      | -0.90     |
| -0.61                                                                                    | -0.77    | 1.05       | -0.13    | -0.75       | -0.57      | -1.10     |
| -0.21                                                                                    | -1.49    | 1.63       | 1.55     | 0.67        | 0.31       | -0.72     |
| -0.89                                                                                    | 0.13     | -0.90      | -1.02    | -1.22       | -0.23      | 0.89      |
| -0.37                                                                                    | -1.08    | -0.11      | 0.20     | 0.15        | 2.45       | -0.36     |
| -0.34                                                                                    | 0.48     | -0.82      | -1.05    | -1.16       | -1.11      | 0.57      |
| 0.91                                                                                     | 0.42     | 0.37       | -0.16    | -0.65       | 0.13       | -0.64     |
| 0.36                                                                                     | -0.42    | 0.30       | 1.15     | 0.51        | 1.73       | -0.85     |
| 1.35                                                                                     | 0.79     | -0.76      | -0.80    | 0.80        | 0.02       | 0.45      |
| 0.53                                                                                     | 0.53     | -0.15      | -0.08    | -0.89       | -0.16      | -0.56     |
| 1.12                                                                                     | -1.11    | 0.57       | -0.68    | 0.21        | 1.63       | -1.27     |
| 1.12                                                                                     | -0.49    | 0.84       | 0.72     | -0.79       | 2.06       | -0.49     |

|       |       |       |       |       |       |       |
|-------|-------|-------|-------|-------|-------|-------|
| -0.27 | -0.21 | 0.18  | 0.45  | 1.51  | -0.88 | -0.99 |
| 1.34  | 0.79  | -0.60 | -0.60 | 1.68  | 0.11  | 2.08  |
| 0.69  | 1.83  | -0.56 | -0.19 | 1.17  | -0.20 | 1.72  |
| 0.24  | 3.16  | -0.80 | -0.77 | 0.47  | -1.01 | 0.64  |
| -1.91 | -0.15 | -0.74 | 0.16  | -0.61 | -0.32 | 1.86  |
| -0.47 | 0.53  | -0.77 | -0.33 | 1.57  | 0.38  | 0.79  |
| -0.12 | -0.74 | 1.97  | -0.16 | 0.79  | 0.94  | -0.24 |
| -0.18 | -1.36 | 1.52  | 1.56  | -0.98 | -0.66 | -0.53 |
| 1.20  | -1.48 | -0.11 | 0.30  | 1.01  | 0.33  | -1.63 |
| -0.52 | -1.36 | 1.28  | -0.31 | -0.19 | -0.83 | -1.96 |
| -1.39 | 0.52  | 0.47  | -0.17 | 0.86  | -1.55 | -1.42 |
| -1.40 | -1.57 | 4.08  | 1.23  | 0.85  | 0.49  | -1.43 |
| -1.82 | -0.75 | -0.61 | 4.25  | -1.74 | 1.79  | 0.82  |
| 0.62  | -0.26 | -0.58 | -1.48 | -0.20 | 0.32  | -0.47 |
| -0.26 | -0.32 | 0.02  | -1.31 | -0.94 | 1.10  | -0.80 |
| 1.10  | -0.49 | -0.99 | -0.90 | 0.23  | 0.41  | -0.13 |
| -1.47 | 0.52  | -1.00 | -1.70 | -1.72 | -1.76 | -0.21 |
| 1.04  | -1.15 | 0.00  | -1.12 | -0.38 | 0.87  | -1.57 |
| -0.11 | -1.26 | 0.77  | -0.54 | -0.27 | 0.83  | -1.47 |
| -0.17 | -0.78 | -0.76 | -0.78 | -0.91 | 1.28  | -0.21 |
| 0.18  | 3.78  | -0.46 | -0.89 | 5.56  | -0.94 | -1.15 |
| 2.26  | 20.61 | -0.36 | -0.34 | 7.72  | -0.99 | -0.81 |
| 0.79  | -0.32 | -0.84 | 0.22  | 1.36  | -0.81 | -0.61 |
| 1.09  | -1.18 | 0.25  | -0.49 | 1.23  | 1.48  | -1.62 |
| -0.03 | -0.15 | -0.78 | -0.93 | -0.73 | 0.76  | -1.22 |
| -0.90 | 4.71  | -0.79 | -1.27 | 1.28  | -1.56 | -1.54 |
| 1.33  | -1.09 | -0.36 | 1.67  | 0.91  | 4.26  | -0.61 |
| 0.71  | 0.45  | -0.60 | 0.32  | 1.35  | 1.25  | 0.24  |
| 1.23  | -0.26 | 0.17  | 0.47  | -0.69 | 2.98  | -1.08 |
| 1.94  | -0.22 | -0.48 | -0.06 | -0.52 | 2.36  | -0.67 |
| 1.12  | -0.62 | -0.33 | 0.43  | 0.59  | 2.46  | -1.13 |
| 1.49  | 1.17  | -0.87 | 0.84  | 4.20  | -0.72 | -0.18 |
| 1.04  | 1.00  | -0.40 | 0.96  | 3.01  | -1.18 | 0.68  |
| 0.93  | 0.23  | -0.70 | 1.31  | 1.71  | 1.54  | 0.07  |
| 0.30  | 0.22  | -0.51 | 0.00  | 1.37  | -0.52 | -0.03 |
| 1.34  | 0.28  | -0.95 | 0.26  | 1.36  | -0.96 | -0.02 |
| 0.62  | 0.07  | -0.38 | 0.90  | 1.59  | 0.20  | -0.72 |
| -0.52 | -0.83 | 1.33  | -0.48 | -0.83 | 0.51  | -0.21 |
| -0.79 | 1.87  | -0.78 | -0.75 | 0.97  | 0.33  | 0.87  |
| -1.37 | 1.12  | -0.33 | 0.58  | 0.65  | 3.47  | 0.79  |
| -1.43 | 0.80  | -0.08 | 0.86  | -0.59 | 2.90  | 0.83  |
| -0.95 | -0.97 | 2.29  | 0.17  | -0.76 | 0.17  | -0.46 |
| -0.48 | 0.87  | -0.40 | -0.99 | 0.30  | -0.54 | 0.84  |
| -0.93 | -0.15 | -0.24 | -0.50 | 0.48  | 0.38  | 1.27  |
| -0.22 | -0.31 | -0.66 | 0.45  | -0.09 | 0.06  | 0.68  |
| -0.29 | 3.48  | 2.73  | -0.08 | -0.83 | -0.83 | 0.49  |
| 1.31  | -1.09 | 0.19  | -0.38 | 0.00  | -0.50 | -1.92 |
| -1.66 | -1.07 | 1.31  | 0.86  | 0.07  | -1.06 | -1.94 |
| -0.87 | 3.76  | 0.00  | 3.26  | -0.84 | 0.01  | 5.63  |
| 0.11  | 0.22  | 0.08  | 1.33  | -0.06 | 2.01  | 1.24  |
| 1.16  | -0.33 | -0.68 | -0.89 | 0.19  | -0.47 | -0.40 |
| -0.07 | -1.95 | 1.99  | -1.65 | -0.63 | 1.58  | -1.70 |
| -0.18 | -0.66 | 0.23  | -0.22 | -0.63 | -0.07 | 0.08  |
| -0.02 | -0.61 | 0.23  | -0.14 | -1.33 | 1.86  | 0.30  |
| 1.25  | 25.44 | -0.94 | -1.08 | -0.57 | -1.86 | -0.98 |
| -0.28 | 0.66  | -0.41 | -0.13 | 0.05  | 0.52  | -0.34 |
| 0.21  | -1.20 | 0.84  | -0.26 | -0.28 | 0.66  | -1.37 |
| -1.02 | -1.21 | 1.12  | -0.67 | -0.17 | -0.39 | -0.47 |
| 2.55  | -0.67 | -0.22 | 1.82  | 1.21  | 1.93  | -0.49 |

|       |       |       |       |       |       |       |
|-------|-------|-------|-------|-------|-------|-------|
| 0.40  | -1.17 | 0.04  | 1.78  | 0.97  | 2.51  | -0.60 |
| 0.29  | -0.01 | -0.46 | 0.72  | 0.69  | -0.34 | -0.33 |
| 0.20  | -0.50 | -0.46 | 1.56  | 1.59  | 0.93  | -0.17 |
| -0.17 | 0.03  | -0.89 | -0.20 | -0.40 | 2.45  | -0.88 |
| 0.83  | -0.62 | 0.61  | 0.40  | -0.94 | 2.36  | -1.09 |
| 0.10  | -1.11 | 1.49  | 1.17  | -1.06 | -0.15 | -0.54 |
| 1.08  | 0.11  | -0.92 | 0.84  | -0.22 | 2.33  | -1.18 |
| 2.04  | -0.40 | -0.67 | 0.44  | 0.55  | 1.65  | -0.31 |
| 1.24  | -0.14 | -0.21 | 1.64  | 0.07  | 0.61  | -0.66 |
| 1.60  | -1.03 | 0.40  | -0.30 | 0.38  | 2.13  | -0.97 |
| 0.87  | -0.38 | -0.66 | 1.07  | 0.71  | 1.22  | -0.22 |
| -0.74 | 0.95  | 3.43  | 0.30  | -0.31 | -0.92 | 1.14  |
| 1.02  | -0.75 | -0.79 | -1.13 | 1.53  | -0.90 | -1.55 |
| 1.14  | 0.52  | -0.86 | -0.55 | 1.63  | -0.17 | 2.16  |
| -0.77 | -1.14 | 0.41  | -0.06 | 2.48  | -0.04 | -0.42 |
| -0.39 | -0.36 | 0.69  | -0.35 | 3.96  | -0.16 | -1.26 |
| -1    | -1    | -1    | -1    | 0     | 0     | -1    |
| 0.00  | 0.00  | 0.00  | 0.00  | 0.00  | 0.00  | 0.00  |
| 1.00  | 1.00  | 1.00  | 1.00  | 1.00  | 1.00  | 1.00  |
| 0.33  | 0.93  | 0.23  | 0.31  | 0.10  | 0.82  | 0.55  |

| 26            | 27            | 28          | 29          | 30           | 31            | 32            |
|---------------|---------------|-------------|-------------|--------------|---------------|---------------|
| TACCACAGGGTAC | AAAAGCTGGGTTG | TTTGGCAATGG | TCGAGGAGCTC | TCAGTGCATCAC | TGTA AACATCCT | AGAGGTAGTAGGT |
| miR-140-3p    | miR-320a      | miR-182-5p  | miR-151b    | miR-148b-3p  | miR-30c-5p    | let-7d-5p     |
| 605614        | 549148        | 501331      | 500966      | 497718       | 492626        | 463804        |
| 1.34          | 0.58          | -0.73       | -0.90       | 0.26         | -0.41         | -0.85         |
| -1.78         | -1.10         | 2.95        | 1.14        | -1.50        | -0.86         | -1.63         |
| 0.50          | -0.21         | 0.51        | 1.56        | -0.73        | -0.23         | 0.95          |
| 1.67          | -0.33         | -0.18       | -0.43       | -0.75        | -0.87         | 0.18          |
| -1.76         | -0.42         | -0.74       | 3.04        | -1.43        | 0.52          | 1.13          |
| -0.75         | -0.44         | -0.97       | -0.44       | 0.67         | -1.19         | -0.56         |
| -0.36         | 1.04          | -0.81       | -0.76       | 1.48         | -1.14         | -0.06         |
| -0.61         | -0.33         | -0.91       | -1.54       | -0.75        | -0.58         | -0.05         |
| -0.73         | -0.97         | 0.19        | 0.09        | -0.70        | -0.54         | -0.90         |
| -0.61         | -0.77         | 1.05        | -0.13       | -0.75        | -0.57         | -1.10         |
| -0.21         | -1.49         | 1.63        | 1.55        | 0.67         | 0.31          | -0.72         |
| -0.89         | 0.13          | -0.90       | -1.02       | -1.22        | -0.23         | 0.89          |
| -0.37         | -1.08         | -0.11       | 0.20        | 0.15         | 2.45          | -0.36         |
| -0.34         | 0.48          | -0.82       | -1.05       | -1.16        | -1.11         | 0.57          |
| 0.91          | 0.42          | 0.37        | -0.16       | -0.65        | 0.13          | -0.64         |
| 0.36          | -0.42         | 0.30        | 1.15        | 0.51         | 1.73          | -0.85         |
| 1.35          | 0.79          | -0.76       | -0.80       | 0.80         | 0.02          | 0.45          |
| 0.53          | 0.53          | -0.15       | -0.08       | -0.89        | -0.16         | -0.56         |
| 1.12          | -1.11         | 0.57        | -0.68       | 0.21         | 1.63          | -1.27         |
| 1.12          | -0.49         | 0.84        | 0.72        | -0.79        | 2.06          | -0.49         |
| -0.27         | -0.21         | 0.18        | 0.45        | 1.51         | -0.88         | -0.99         |
| 1.34          | 0.79          | -0.60       | -0.60       | 1.68         | 0.11          | 2.08          |
| 0.69          | 1.83          | -0.56       | -0.19       | 1.17         | -0.20         | 1.72          |
| 0.24          | 3.16          | -0.80       | -0.77       | 0.47         | -1.01         | 0.64          |
| -1.91         | -0.15         | -0.74       | 0.16        | -0.61        | -0.32         | 1.86          |
| -0.47         | 0.53          | -0.77       | -0.33       | 1.57         | 0.38          | 0.79          |
| -0.12         | -0.74         | 1.97        | -0.16       | 0.79         | 0.94          | -0.24         |
| -0.18         | -1.36         | 1.52        | 1.56        | -0.98        | -0.66         | -0.53         |

|       |       |       |       |       |       |       |
|-------|-------|-------|-------|-------|-------|-------|
| 1.20  | -1.48 | -0.11 | 0.30  | 1.01  | 0.33  | -1.63 |
| -0.52 | -1.36 | 1.28  | -0.31 | -0.19 | -0.83 | -1.96 |
| -1.39 | 0.52  | 0.47  | -0.17 | 0.86  | -1.55 | -1.42 |
| -1.40 | -1.57 | 4.08  | 1.23  | 0.85  | 0.49  | -1.43 |
| -1.82 | -0.75 | -0.61 | 4.25  | -1.74 | 1.79  | 0.82  |
| 0.62  | -0.26 | -0.58 | -1.48 | -0.20 | 0.32  | -0.47 |
| -0.26 | -0.32 | 0.02  | -1.31 | -0.94 | 1.10  | -0.80 |
| 1.10  | -0.49 | -0.99 | -0.90 | 0.23  | 0.41  | -0.13 |
| -1.47 | 0.52  | -1.00 | -1.70 | -1.72 | -1.76 | -0.21 |
| 1.04  | -1.15 | 0.00  | -1.12 | -0.38 | 0.87  | -1.57 |
| -0.11 | -1.26 | 0.77  | -0.54 | -0.27 | 0.83  | -1.47 |
| -0.17 | -0.78 | -0.76 | -0.78 | -0.91 | 1.28  | -0.21 |
| 0.18  | 3.78  | -0.46 | -0.89 | 5.56  | -0.94 | -1.15 |
| 2.26  | 20.61 | -0.36 | -0.34 | 7.72  | -0.99 | -0.81 |
| 0.79  | -0.32 | -0.84 | 0.22  | 1.36  | -0.81 | -0.61 |
| 1.09  | -1.18 | 0.25  | -0.49 | 1.23  | 1.48  | -1.62 |
| -0.03 | -0.15 | -0.78 | -0.93 | -0.73 | 0.76  | -1.22 |
| -0.90 | 4.71  | -0.79 | -1.27 | 1.28  | -1.56 | -1.54 |
| 1.33  | -1.09 | -0.36 | 1.67  | 0.91  | 4.26  | -0.61 |
| 0.71  | 0.45  | -0.60 | 0.32  | 1.35  | 1.25  | 0.24  |
| 1.23  | -0.26 | 0.17  | 0.47  | -0.69 | 2.98  | -1.08 |
| 1.94  | -0.22 | -0.48 | -0.06 | -0.52 | 2.36  | -0.67 |
| 1.12  | -0.62 | -0.33 | 0.43  | 0.59  | 2.46  | -1.13 |
| 1.49  | 1.17  | -0.87 | 0.84  | 4.20  | -0.72 | -0.18 |
| 1.04  | 1.00  | -0.40 | 0.96  | 3.01  | -1.18 | 0.68  |
| 0.93  | 0.23  | -0.70 | 1.31  | 1.71  | 1.54  | 0.07  |
| 0.30  | 0.22  | -0.51 | 0.00  | 1.37  | -0.52 | -0.03 |
| 1.34  | 0.28  | -0.95 | 0.26  | 1.36  | -0.96 | -0.02 |
| 0.62  | 0.07  | -0.38 | 0.90  | 1.59  | 0.20  | -0.72 |
| -0.52 | -0.83 | 1.33  | -0.48 | -0.83 | 0.51  | -0.21 |
| -0.79 | 1.87  | -0.78 | -0.75 | 0.97  | 0.33  | 0.87  |
| -1.37 | 1.12  | -0.33 | 0.58  | 0.65  | 3.47  | 0.79  |
| -1.43 | 0.80  | -0.08 | 0.86  | -0.59 | 2.90  | 0.83  |
| -0.95 | -0.97 | 2.29  | 0.17  | -0.76 | 0.17  | -0.46 |
| -0.48 | 0.87  | -0.40 | -0.99 | 0.30  | -0.54 | 0.84  |
| -0.93 | -0.15 | -0.24 | -0.50 | 0.48  | 0.38  | 1.27  |
| -0.22 | -0.31 | -0.66 | 0.45  | -0.09 | 0.06  | 0.68  |
| -0.29 | 3.48  | 2.73  | -0.08 | -0.83 | -0.83 | 0.49  |
| 1.31  | -1.09 | 0.19  | -0.38 | 0.00  | -0.50 | -1.92 |
| -1.66 | -1.07 | 1.31  | 0.86  | 0.07  | -1.06 | -1.94 |
| -0.87 | 3.76  | 0.00  | 3.26  | -0.84 | 0.01  | 5.63  |
| 0.11  | 0.22  | 0.08  | 1.33  | -0.06 | 2.01  | 1.24  |
| 1.16  | -0.33 | -0.68 | -0.89 | 0.19  | -0.47 | -0.40 |
| -0.07 | -1.95 | 1.99  | -1.65 | -0.63 | 1.58  | -1.70 |
| -0.18 | -0.66 | 0.23  | -0.22 | -0.63 | -0.07 | 0.08  |
| -0.02 | -0.61 | 0.23  | -0.14 | -1.33 | 1.86  | 0.30  |
| 1.25  | 25.44 | -0.94 | -1.08 | -0.57 | -1.86 | -0.98 |
| -0.28 | 0.66  | -0.41 | -0.13 | 0.05  | 0.52  | -0.34 |
| 0.21  | -1.20 | 0.84  | -0.26 | -0.28 | 0.66  | -1.37 |
| -1.02 | -1.21 | 1.12  | -0.67 | -0.17 | -0.39 | -0.47 |
| 2.55  | -0.67 | -0.22 | 1.82  | 1.21  | 1.93  | -0.49 |
| 0.40  | -1.17 | 0.04  | 1.78  | 0.97  | 2.51  | -0.60 |
| 0.29  | -0.01 | -0.46 | 0.72  | 0.69  | -0.34 | -0.33 |
| 0.20  | -0.50 | -0.46 | 1.56  | 1.59  | 0.93  | -0.17 |
| -0.17 | 0.03  | -0.89 | -0.20 | -0.40 | 2.45  | -0.88 |
| 0.83  | -0.62 | 0.61  | 0.40  | -0.94 | 2.36  | -1.09 |
| 0.10  | -1.11 | 1.49  | 1.17  | -1.06 | -0.15 | -0.54 |
| 1.08  | 0.11  | -0.92 | 0.84  | -0.22 | 2.33  | -1.18 |
| 2.04  | -0.40 | -0.67 | 0.44  | 0.55  | 1.65  | -0.31 |

|       |       |       |       |       |       |       |
|-------|-------|-------|-------|-------|-------|-------|
| 1.24  | -0.14 | -0.21 | 1.64  | 0.07  | 0.61  | -0.66 |
| 1.60  | -1.03 | 0.40  | -0.30 | 0.38  | 2.13  | -0.97 |
| 0.87  | -0.38 | -0.66 | 1.07  | 0.71  | 1.22  | -0.22 |
| -0.74 | 0.95  | 3.43  | 0.30  | -0.31 | -0.92 | 1.14  |
| 1.02  | -0.75 | -0.79 | -1.13 | 1.53  | -0.90 | -1.55 |
| 1.14  | 0.52  | -0.86 | -0.55 | 1.63  | -0.17 | 2.16  |
| -0.77 | -1.14 | 0.41  | -0.06 | 2.48  | -0.04 | -0.42 |
| 0     | 0     | 1     | 0     | 4     | 0     | -1    |

---

| 26           | 27           | 28          | 29          | 30           | 31            | 32            |
|--------------|--------------|-------------|-------------|--------------|---------------|---------------|
| 12           | 100          | 104         | 75          | 133          | 127           | 97            |
| GTAAACATCCCC | TAGTGCAATATT | TACCCTGTAGA | TAGCACCATCT | CCCAGTGTTCAG | CTGCCCTGGCCCC | TCCGGTTCTCAGC |
| miR-30d-5p   | miR-454-3p   | miR-10a-5p  | miR-29a-3p  | miR-199a-5p  | miR-874       | miR-671-3p    |
| 2131733      | 2.68E+04     | 25811       | 67482       | 11007        | 12358         | 28118         |
| 1.36         | -0.69        | -0.49       | -0.31       | -0.34        | 0.68          | -1.03         |
| -1.18        | -0.81        | 4.54        | -0.98       | -0.42        | -1.39         | -0.76         |
| 0.67         | -0.15        | -0.12       | -0.02       | -0.25        | -0.16         | -1.30         |
| -0.53        | -0.60        | -0.20       | -0.65       | -1.00        | -0.78         | -1.25         |
| -0.37        | -0.03        | -0.01       | 2.85        | -0.84        | 1.98          | 1.93          |
| -1.57        | -0.48        | -0.31       | -0.78       | -0.20        | -0.77         | 2.02          |
| 0.31         | -0.61        | -0.52       | -0.85       | -0.75        | -0.91         | 1.44          |
| 0.77         | -0.68        | -0.61       | -0.83       | -1.14        | -0.85         | 1.26          |
| -0.94        | -0.41        | -0.31       | -1.06       | -0.25        | -0.79         | -0.98         |
| -1.48        | 0.65         | -0.03       | -0.90       | -0.80        | 0.19          | -1.16         |
| -0.41        | 0.26         | 1.44        | 0.15        | 2.66         | 0.94          | -0.71         |
| -0.62        | -0.68        | -0.46       | -0.87       | -1.06        | -0.80         | 0.50          |
| 0.02         | 3.65         | -0.33       | 0.89        | 0.93         | -0.77         | -0.51         |
| -0.26        | -0.62        | -0.52       | -0.94       | -0.60        | -0.77         | 0.18          |
| -0.38        | 0.82         | -0.42       | -0.19       | 0.03         | -0.44         | -0.15         |
| 0.86         | 1.32         | 0.50        | 1.67        | 2.67         | 0.01          | 0.04          |
| 0.79         | -0.62        | -0.37       | 0.05        | 0.33         | 1.84          | 0.15          |
| 1.69         | 0.04         | -0.21       | 0.35        | -0.96        | 0.33          | -1.06         |
| -1.09        | -0.10        | -0.17       | 0.53        | -0.34        | -0.36         | -0.14         |
| 1.42         | 1.58         | -0.29       | 1.56        | -0.08        | -0.49         | -0.77         |
| -1.56        | -0.24        | -0.48       | -0.42       | -0.18        | -0.30         | 0.58          |
| 1.04         | -0.70        | -0.26       | -0.14       | 0.08         | -0.16         | 0.92          |
| 1.58         | -0.55        | -0.28       | -0.16       | 0.50         | 0.00          | 0.85          |
| 0.57         | -0.65        | -0.54       | -0.79       | -0.47        | 0.26          | 0.84          |
| -0.97        | -0.50        | 0.38        | 0.00        | 0.18         | 1.29          | 0.69          |
| 0.43         | -0.44        | -0.10       | 1.88        | 0.68         | 2.72          | -0.56         |
| -0.16        | 1.26         | 0.18        | -0.02       | 1.62         | -0.50         | -1.03         |
| -1.11        | 2.44         | 0.45        | 0.53        | 2.05         | -0.59         | -1.52         |
| -1.90        | -0.36        | 0.29        | 1.60        | 1.23         | -0.11         | -0.16         |
| -2.45        | -0.50        | -0.07       | -0.40       | -0.20        | -0.55         | -0.90         |
| -1.11        | -0.61        | -0.21       | -1.23       | -1.12        | -0.96         | -0.21         |
| -2.10        | -0.34        | 1.08        | -0.68       | 1.36         | -0.52         | -0.56         |
| -0.74        | 1.18         | 0.73        | 3.83        | 0.79         | -0.69         | -0.59         |
| -0.37        | -0.56        | -0.57       | -0.48       | -0.82        | -1.11         | 0.18          |
| -0.43        | -0.49        | -0.50       | -0.41       | -0.89        | -1.04         | 0.25          |
| -0.78        | -0.60        | -0.35       | 0.51        | -0.56        | 0.13          | 0.25          |
| -2.02        | -0.77        | -0.67       | -1.29       | -1.39        | -1.09         | 0.03          |
| -0.75        | -0.06        | -0.26       | -0.50       | 0.16         | -0.85         | -0.64         |
| -0.21        | 2.27         | 0.43        | 0.80        | 1.75         | 0.08          | -1.46         |

|       |       |       |       |       |       |       |
|-------|-------|-------|-------|-------|-------|-------|
| 0.55  | -0.58 | -0.09 | 0.79  | -0.19 | 0.20  | 0.18  |
| -0.79 | -0.71 | -0.59 | -0.82 | -0.54 | 7.67  | 0.80  |
| -0.73 | -0.65 | -0.39 | -0.92 | 4.25  | 54.32 | 3.37  |
| 0.39  | -0.53 | -0.33 | -0.09 | 1.35  | 1.01  | 0.31  |
| -1.43 | 1.26  | -0.26 | 0.79  | 0.08  | -0.42 | -0.10 |
| -0.60 | -0.56 | -0.43 | -0.65 | -0.86 | -0.49 | 3.01  |
| -0.85 | -0.78 | -0.65 | -1.11 | -1.53 | 7.11  | 1.26  |
| 0.82  | -0.12 | -0.25 | 5.19  | 1.79  | 0.78  | -0.61 |
| 1.89  | -0.61 | -0.45 | 0.73  | -0.08 | -0.31 | 1.21  |
| 3.59  | -0.11 | -0.44 | 0.53  | 0.09  | -0.56 | -0.49 |
| 1.84  | -0.59 | -0.45 | 2.18  | -0.49 | 0.22  | -0.41 |
| 2.95  | 0.00  | -0.29 | 1.43  | 1.41  | -0.34 | -0.45 |
| 0.67  | -0.65 | -0.43 | 0.38  | 1.74  | 0.91  | 0.75  |
| -0.78 | -0.55 | -0.40 | -0.70 | 0.73  | -0.39 | 0.05  |
| 0.77  | -0.12 | -0.22 | 1.66  | 2.06  | 0.68  | 0.03  |
| -0.69 | -0.64 | -0.47 | -0.36 | -0.56 | -0.71 | 1.40  |
| -0.37 | -0.63 | -0.45 | 0.14  | 0.23  | 1.78  | 0.02  |
| 0.20  | -0.11 | -0.28 | 0.03  | 0.42  | 0.11  | -0.26 |
| -1.13 | 5.38  | 0.72  | 2.18  | 0.66  | -0.37 | -1.38 |
| 0.73  | -0.60 | -0.23 | 0.74  | 0.28  | 0.49  | 0.58  |
| 2.52  | 0.34  | 0.01  | 3.60  | 1.59  | 0.33  | 1.25  |
| 1.27  | 0.19  | 0.61  | 5.59  | 0.37  | 0.96  | 0.18  |
| -1.15 | 6.59  | 0.09  | 0.90  | 0.48  | -0.66 | -1.48 |
| 0.27  | -0.64 | -0.39 | -0.39 | -0.67 | 0.10  | -0.75 |
| -0.30 | -0.48 | -0.26 | 0.23  | -0.37 | 0.27  | -0.29 |
| -0.57 | 0.21  | -0.27 | 0.01  | -0.17 | -0.01 | -1.23 |
| 0.49  | -0.53 | -0.11 | -0.88 | -0.46 | -1.20 | -0.44 |
| -0.81 | 0.14  | -0.45 | -0.02 | 0.36  | 0.20  | -1.61 |
| -2.17 | -0.81 | 1.23  | -0.31 | 0.19  | -0.18 | -0.14 |
| 5.34  | -0.44 | -0.01 | -0.20 | -0.48 | -0.47 | -0.42 |
| 5.55  | -0.29 | 0.18  | 2.06  | 0.55  | -0.17 | -0.11 |
| -0.14 | -0.66 | -0.40 | -0.52 | -0.72 | -0.85 | -0.51 |
| -1.03 | 0.38  | -0.34 | 0.35  | -1.25 | -0.88 | -1.41 |
| -0.74 | -0.12 | -0.35 | -0.57 | -0.66 | -0.80 | -1.08 |
| 1.01  | 1.49  | -0.15 | -0.20 | -0.47 | -0.95 | -0.87 |
| -1.12 | -0.69 | -0.70 | -0.75 | 0.17  | 59.63 | 4.27  |
| -0.36 | 0.96  | -0.42 | 0.61  | -0.19 | -0.73 | -0.16 |
| -1.54 | 0.04  | -0.31 | 0.21  | 0.08  | -0.26 | 0.05  |
| -1.86 | -0.41 | -0.17 | -0.77 | -0.99 | -0.64 | 2.58  |
| 0.57  | 0.68  | 0.36  | 2.76  | 2.25  | 0.73  | -1.27 |
| 0.66  | 0.04  | 0.20  | 3.63  | 2.99  | 0.31  | -0.68 |
| 0.67  | -0.65 | -0.30 | 0.20  | 0.32  | 1.25  | -0.41 |
| -0.73 | -0.37 | -0.16 | 2.88  | 0.42  | 1.07  | -0.46 |
| 1.28  | -0.57 | -0.54 | -0.08 | -0.30 | -0.28 | 0.52  |
| 1.16  | 1.76  | -0.01 | 1.23  | 0.33  | -0.02 | -1.14 |
| -0.74 | 4.35  | -0.23 | 0.49  | -0.56 | -0.89 | -1.51 |
| 0.70  | -0.49 | -0.41 | 1.27  | 2.97  | 0.70  | 0.01  |
| 1.07  | -0.48 | -0.08 | 2.79  | -0.11 | 0.61  | -0.49 |
| -0.31 | -0.57 | -0.54 | 0.99  | -0.55 | 0.55  | -0.61 |
| -0.50 | 1.26  | -0.41 | 0.92  | -0.79 | -0.80 | 0.12  |
| -0.30 | -0.44 | -0.37 | 2.22  | 1.12  | 0.26  | -0.16 |
| -0.11 | 1.60  | 0.83  | 0.16  | -0.32 | -0.45 | -0.80 |
| -1.93 | -0.62 | -0.51 | -0.28 | -1.15 | -0.75 | 0.63  |
| 1.81  | -0.63 | -0.36 | 0.04  | -0.14 | 0.21  | 0.98  |
| -1.52 | 0.06  | 0.62  | -0.03 | 0.84  | -0.17 | -0.75 |
| -0.38 | -0.15 | 0.07  | 0.32  | 1.67  | 1.86  | -1.33 |
| 0.07  | 0.07  | 0.07  | 0.07  | 0.07  | 0.07  | 0.07  |
| 0.08  | 0.06  | 0.06  | 0.08  | 0.04  | 0.03  | 0.18  |













































































































































































|        |         |         |         |         |        |         |
|--------|---------|---------|---------|---------|--------|---------|
| 148505 | 1922117 | 685397  | 2915691 | 932164  | 148130 | 2018570 |
| 36     | 37      | 38      | 39      | 40      | 41     | 42      |
| 6      | 7       | 8       | 9       | 10      | 11     | 12      |
| B_30   | B_33    | C_2     | C_37    | C_38    | C_39   | C_43    |
| CHR_NP | CHR_NP  | CHR_NP  | CHR_NP  | CHR_NP  | CHR_NP | CHR_NP  |
| 852085 | 4579742 | 2339361 | 4568063 | 3630812 | 258656 | 5675202 |
| 0.39   | 0.91    | 0.50    | 0.52    | 0.44    | 0.13   | 0.17    |
| B_30   | B_33    | C_2     | C_37    | C_38    | C_39   | C_43    |
| 703580 | 2657625 | 1653964 | 1652372 | 2698648 | 110526 | 3656632 |
| 4948   | 1007604 | 324840  | 1119107 | 698786  | 56414  | 382904  |
| 27066  | 82363   | 53864   | 107450  | 11085   | 4692   | 49604   |
| 6598   | 53526   | 26948   | 527415  | 18116   | 13820  | 77016   |
| 19460  | 105395  | 30924   | 186072  | 37780   | 6531   | 62996   |
| 4335   | 185758  | 52795   | 221867  | 36882   | 11931  | 143942  |
| 21454  | 22114   | 14962   | 22930   | 3941    | 3244   | 97556   |
| 15329  | 42853   | 11026   | 94903   | 4076    | 6644   | 91561   |
| 2182   | 4727    | 8808    | 5144    | 336     | 1560   | 352009  |
| 731    | 14989   | 4841    | 20714   | 1927    | 1860   | 50045   |
| 3504   | 41754   | 23520   | 60783   | 6245    | 7346   | 116265  |
| 1040   | 18898   | 8215    | 32180   | 6565    | 5855   | 75495   |
| 1737   | 26780   | 9268    | 36680   | 7874    | 1869   | 28048   |
| 2414   | 9346    | 2814    | 49017   | 1645    | 2208   | 28494   |
| 1939   | 29210   | 14032   | 24453   | 24432   | 1247   | 16962   |
| 2405   | 3647    | 1546    | 8257    | 694     | 1172   | 28299   |
| 145    | 33307   | 3175    | 39192   | 13559   | 450    | 5400    |
| 2972   | 4989    | 1148    | 9621    | 146     | 686    | 21808   |
| 1417   | 8203    | 5081    | 12394   | 826     | 1168   | 18331   |
| 933    | 6588    | 2949    | 15407   | 717     | 918    | 26233   |
| 438    | 14685   | 3594    | 24919   | 1038    | 1631   | 17880   |
| 623    | 10198   | 3542    | 20190   | 1251    | 1020   | 15754   |
| 355    | 9348    | 4198    | 9877    | 1143    | 841    | 20274   |
| 195    | 8208    | 1746    | 11176   | 292     | 1148   | 13470   |
| 2483   | 9903    | 3570    | 12983   | 77      | 333    | 16065   |
| 618    | 960     | 351     | 6261    | 89      | 832    | 10359   |
| 78     | 8786    | 2119    | 15706   | 1088    | 781    | 6546    |
| 387    | 7245    | 2471    | 9772    | 5049    | 303    | 3559    |
| 209    | 3111    | 2406    | 849     | 240     | 517    | 11574   |
| 1384   | 1840    | 832     | 5551    | 587     | 227    | 4758    |
| 118    | 5546    | 1298    | 10136   | 844     | 393    | 5438    |
| 712    | 6198    | 2874    | 9819    | 441     | 586    | 7562    |
| 698    | 5805    | 1680    | 10464   | 3285    | 188    | 2775    |
| 323    | 2251    | 767     | 4123    | 191     | 168    | 8470    |
| 235    | 3245    | 1664    | 2212    | 114     | 567    | 22075   |
| 1268   | 1654    | 759     | 5155    | 548     | 208    | 4446    |
| 3972   | 9791    | 8590    | 6463    | 2315    | 359    | 6902    |
| 1051   | 2501    | 1914    | 5083    | 425     | 812    | 14383   |
| 858    | 1145    | 524     | 4974    | 193     | 455    | 9827    |
| 764    | 7023    | 2647    | 8506    | 602     | 173    | 2542    |
| 126    | 5223    | 653     | 10639   | 14956   | 57     | 691     |
| 602    | 13459   | 3447    | 10287   | 568     | 251    | 3486    |
| 64     | 2501    | 1026    | 8284    | 774     | 317    | 3949    |
| 608    | 5028    | 1644    | 5680    | 1033    | 99     | 2057    |
| 608    | 572     | 534     | 672     | 66      | 204    | 5936    |
| 314    | 1352    | 1203    | 6637    | 148     | 185    | 10804   |

|      |      |      |      |      |     |      |
|------|------|------|------|------|-----|------|
| 93   | 3818 | 1085 | 6740 | 861  | 199 | 2797 |
| 134  | 1371 | 356  | 3002 | 208  | 131 | 4229 |
| 71   | 4788 | 1628 | 3092 | 1921 | 111 | 879  |
| 35   | 117  | 59   | 227  | 80   | 7   | 485  |
| 32   | 4093 | 805  | 2038 | 43   | 333 | 5425 |
| 129  | 1251 | 597  | 741  | 308  | 177 | 1261 |
| 829  | 1597 | 1573 | 2395 | 53   | 267 | 5813 |
| 186  | 2136 | 1799 | 1818 | 379  | 160 | 2939 |
| 89   | 2497 | 468  | 2899 | 117  | 243 | 2661 |
| 3    | 2771 | 336  | 2193 | 110  | 149 | 1297 |
| 5    | 119  | 63   | 205  | 19   | 58  | 2116 |
| 374  | 1787 | 972  | 1974 | 277  | 83  | 3015 |
| 128  | 3593 | 697  | 2658 | 128  | 111 | 2724 |
| 77   | 1228 | 427  | 4160 | 175  | 194 | 3000 |
| 1831 | 389  | 166  | 1502 | 354  | 43  | 668  |
| 177  | 1864 | 741  | 3150 | 172  | 202 | 4586 |
| 59   | 1616 | 701  | 2575 | 92   | 164 | 3392 |
| 78   | 105  | 93   | 261  | 28   | 30  | 2396 |
| 17   | 92   | 58   | 431  | 30   | 17  | 309  |
| 42   | 1652 | 403  | 724  | 3378 | 35  | 294  |
| 186  | 639  | 285  | 640  | 51   | 63  | 2082 |
| 59   | 413  | 787  | 537  | 33   | 237 | 4285 |
| 116  | 270  | 106  | 292  | 9    | 34  | 1456 |
| 115  | 928  | 884  | 1126 | 12   | 88  | 2265 |
| 34   | 375  | 377  | 254  | 70   | 15  | 769  |
| 125  | 2651 | 534  | 2383 | 633  | 135 | 1280 |
| 86   | 1226 | 451  | 1528 | 1881 | 58  | 498  |
| 88   | 106  | 54   | 207  | 26   | 68  | 2189 |
| 11   | 748  | 259  | 1318 | 121  | 95  | 2107 |
| 178  | 427  | 162  | 1376 | 19   | 32  | 1048 |
| 39   | 1006 | 272  | 361  | 228  | 126 | 911  |
| 1    | 493  | 138  | 878  | 127  | 41  | 517  |
| 418  | 104  | 84   | 414  | 86   | 23  | 635  |
| 94   | 1336 | 321  | 1539 | 640  | 24  | 352  |
| 141  | 567  | 423  | 1370 | 103  | 194 | 2209 |
| 137  | 401  | 188  | 761  | 153  | 19  | 631  |
| 5    | 1161 | 369  | 1591 | 252  | 41  | 620  |
| 117  | 593  | 318  | 1085 | 713  | 24  | 169  |
| 8    | 213  | 258  | 341  | 8    | 209 | 5325 |
| 41   | 336  | 134  | 464  | 19   | 16  | 1258 |
| 25   | 818  | 532  | 1293 | 65   | 60  | 1721 |
| 48   | 983  | 385  | 1114 | 522  | 30  | 329  |
| 67   | 135  | 41   | 205  | 12   | 15  | 1000 |
| 92   | 802  | 140  | 1331 | 49   | 34  | 507  |
| 175  | 231  | 36   | 746  | 163  | 17  | 181  |
| 9    | 186  | 87   | 1017 | 64   | 31  | 490  |
| 4    | 21   | 21   | 56   | 22   | 4   | 158  |
| 2    | 799  | 96   | 1035 | 56   | 15  | 195  |
| 24   | 100  | 52   | 286  | 14   | 23  | 500  |
| 14   | 121  | 65   | 104  | 14   | 14  | 1025 |
| 66   | 261  | 94   | 426  | 16   | 28  | 540  |
| 23   | 513  | 187  | 812  | 237  | 24  | 107  |
| 15   | 514  | 204  | 433  | 184  | 33  | 231  |
| 13   | 164  | 88   | 831  | 69   | 35  | 232  |
| 37   | 65   | 29   | 84   | 6    | 15  | 806  |
| 39   | 688  | 362  | 879  | 13   | 41  | 884  |
| 23   | 117  | 47   | 389  | 32   | 24  | 220  |
| 24   | 145  | 67   | 1220 | 189  | 20  | 273  |
| 73   | 90   | 49   | 374  | 9    | 24  | 810  |

|    |     |     |      |     |    |      |
|----|-----|-----|------|-----|----|------|
| 43 | 147 | 175 | 171  | 24  | 41 | 414  |
| 14 | 125 | 62  | 101  | 5   | 13 | 1136 |
| 63 | 684 | 406 | 555  | 47  | 13 | 291  |
| 81 | 184 | 146 | 307  | 15  | 28 | 486  |
| 40 | 170 | 87  | 154  | 14  | 13 | 586  |
| 29 | 84  | 52  | 112  | 8   | 10 | 272  |
| 19 | 153 | 105 | 367  | 20  | 26 | 707  |
| 8  | 323 | 93  | 770  | 55  | 20 | 263  |
| 20 | 704 | 615 | 460  | 15  | 36 | 724  |
| 47 | 89  | 46  | 58   | 8   | 9  | 324  |
| 12 | 62  | 17  | 1363 | 16  | 40 | 503  |
| 18 | 206 | 70  | 1481 | 117 | 17 | 154  |
| 4  | 141 | 58  | 236  | 43  | 17 | 521  |
| 58 | 125 | 41  | 125  | 9   | 11 | 283  |
| 58 | 125 | 41  | 125  | 9   | 11 | 283  |
| 90 | 500 | 306 | 504  | 19  | 20 | 740  |
| 6  | 329 | 188 | 227  | 70  | 17 | 353  |
| 3  | 345 | 124 | 498  | 53  | 12 | 279  |
| 2  | 144 | 20  | 39   | 10  | 25 | 182  |
| 7  | 127 | 46  | 205  | 7   | 20 | 422  |
| 0  | 24  | 7   | 85   | 4   | 3  | 100  |
| 15 | 165 | 56  | 250  | 54  | 17 | 149  |
| 6  | 34  | 15  | 279  | 18  | 5  | 178  |
| 1  | 124 | 60  | 308  | 21  | 13 | 139  |
| 28 | 173 | 74  | 293  | 12  | 3  | 139  |
| 22 | 449 | 106 | 301  | 20  | 1  | 59   |
| 0  | 21  | 17  | 42   | 10  | 1  | 70   |
| 20 | 155 | 65  | 169  | 3   | 8  | 215  |
| 14 | 60  | 19  | 124  | 6   | 11 | 279  |
| 36 | 189 | 67  | 288  | 28  | 21 | 200  |
| 3  | 42  | 18  | 112  | 2   | 4  | 183  |
| 6  | 161 | 95  | 215  | 16  | 18 | 405  |
| 2  | 199 | 23  | 200  | 30  | 14 | 206  |
| 2  | 74  | 23  | 71   | 18  | 5  | 349  |
| 9  | 63  | 14  | 116  | 4   | 4  | 98   |
| 13 | 202 | 50  | 202  | 22  | 6  | 175  |
| 1  | 179 | 34  | 225  | 55  | 5  | 67   |
| 16 | 105 | 61  | 159  | 38  | 9  | 176  |
| 6  | 201 | 21  | 229  | 267 | 7  | 36   |
| 32 | 145 | 28  | 177  | 7   | 4  | 65   |
| 5  | 21  | 15  | 26   | 4   | 0  | 197  |
| 4  | 94  | 25  | 50   | 118 | 4  | 57   |
| 19 | 363 | 59  | 392  | 26  | 6  | 69   |
| 6  | 57  | 15  | 99   | 6   | 4  | 67   |
| 28 | 117 | 35  | 99   | 64  | 5  | 45   |
| 14 | 153 | 72  | 131  | 19  | 3  | 61   |
| 3  | 56  | 36  | 121  | 6   | 12 | 205  |
| 25 | 55  | 19  | 43   | 11  | 4  | 177  |
| 0  | 54  | 7   | 11   | 2   | 9  | 167  |
| 3  | 295 | 45  | 230  | 20  | 2  | 38   |
| 0  | 68  | 24  | 102  | 8   | 4  | 155  |
| 14 | 108 | 106 | 78   | 73  | 2  | 116  |
| 9  | 25  | 14  | 57   | 5   | 0  | 103  |
| 23 | 191 | 103 | 160  | 17  | 9  | 214  |
| 2  | 101 | 43  | 210  | 10  | 8  | 94   |
| 3  | 100 | 21  | 49   | 61  | 6  | 38   |
| 3  | 6   | 2   | 20   | 0   | 1  | 26   |
| 9  | 153 | 81  | 211  | 13  | 13 | 210  |
| 17 | 119 | 42  | 130  | 63  | 4  | 61   |

|    |     |     |     |     |    |     |
|----|-----|-----|-----|-----|----|-----|
| 7  | 57  | 16  | 93  | 1   | 13 | 169 |
| 11 | 43  | 13  | 78  | 1   | 4  | 159 |
| 5  | 110 | 33  | 79  | 154 | 7  | 73  |
| 14 | 70  | 34  | 172 | 14  | 2  | 86  |
| 9  | 44  | 221 | 37  | 28  | 15 | 153 |
| 5  | 18  | 8   | 31  | 0   | 3  | 95  |
| 5  | 68  | 46  | 40  | 21  | 1  | 118 |
| 14 | 103 | 30  | 149 | 1   | 9  | 110 |
| 1  | 60  | 14  | 133 | 4   | 13 | 146 |
| 2  | 36  | 24  | 133 | 36  | 8  | 21  |
| 12 | 64  | 28  | 113 | 4   | 6  | 84  |
| 3  | 41  | 7   | 57  | 0   | 4  | 86  |
| 10 | 131 | 41  | 176 | 27  | 2  | 17  |
| 7  | 66  | 32  | 13  | 9   | 12 | 81  |
| 5  | 16  | 7   | 77  | 3   | 6  | 97  |
| 14 | 69  | 45  | 111 | 1   | 9  | 312 |
| 8  | 104 | 36  | 28  | 11  | 8  | 94  |
| 1  | 89  | 49  | 146 | 44  | 6  | 132 |
| 11 | 11  | 1   | 39  | 1   | 1  | 128 |
| 0  | 20  | 25  | 5   | 12  | 11 | 49  |
| 15 | 31  | 12  | 49  | 2   | 4  | 124 |
| 3  | 34  | 13  | 61  | 43  | 5  | 50  |
| 6  | 80  | 19  | 126 | 89  | 3  | 30  |
| 11 | 11  | 1   | 39  | 1   | 0  | 112 |
| 4  | 47  | 11  | 33  | 3   | 16 | 95  |
| 6  | 44  | 27  | 93  | 11  | 5  | 112 |
| 3  | 52  | 5   | 109 | 5   | 0  | 98  |
| 1  | 1   | 0   | 0   | 3   | 0  | 0   |
| 10 | 9   | 28  | 11  | 3   | 5  | 589 |
| 11 | 45  | 30  | 83  | 0   | 5  | 87  |
| 7  | 80  | 11  | 83  | 52  | 3  | 5   |
| 1  | 49  | 17  | 83  | 20  | 5  | 65  |
| 6  | 14  | 6   | 287 | 4   | 3  | 51  |
| 0  | 27  | 3   | 6   | 0   | 4  | 52  |
| 4  | 42  | 15  | 29  | 26  | 2  | 49  |
| 0  | 60  | 56  | 64  | 1   | 7  | 151 |
| 3  | 25  | 15  | 64  | 2   | 5  | 41  |
| 1  | 46  | 2   | 96  | 20  | 0  | 3   |
| 7  | 32  | 12  | 172 | 2   | 5  | 53  |
| 8  | 41  | 18  | 108 | 12  | 0  | 17  |
| 0  | 61  | 38  | 57  | 5   | 6  | 63  |
| 7  | 21  | 26  | 19  | 4   | 2  | 174 |
| 1  | 40  | 3   | 17  | 3   | 2  | 7   |
| 4  | 51  | 12  | 44  | 42  | 1  | 21  |
| 4  | 97  | 15  | 100 | 12  | 3  | 46  |
| 5  | 24  | 11  | 56  | 6   | 6  | 60  |
| 5  | 66  | 29  | 41  | 66  | 5  | 31  |
| 6  | 65  | 16  | 149 | 8   | 2  | 29  |
| 8  | 72  | 17  | 79  | 1   | 1  | 33  |
| 3  | 5   | 1   | 3   | 1   | 4  | 60  |
| 10 | 56  | 44  | 59  | 54  | 2  | 24  |
| 2  | 38  | 9   | 13  | 3   | 6  | 42  |
| 2  | 36  | 8   | 75  | 8   | 0  | 14  |
| 2  | 50  | 13  | 65  | 7   | 3  | 31  |
| 0  | 51  | 5   | 70  | 3   | 3  | 21  |
| 0  | 1   | 0   | 4   | 0   | 0  | 18  |
| 9  | 31  | 8   | 78  | 8   | 3  | 36  |
| 12 | 2   | 2   | 2   | 0   | 2  | 64  |
| 2  | 51  | 24  | 32  | 11  | 2  | 64  |



|    |    |    |    |    |   |     |
|----|----|----|----|----|---|-----|
| 2  | 38 | 18 | 75 | 0  | 3 | 129 |
| 6  | 34 | 25 | 43 | 10 | 4 | 123 |
| 8  | 26 | 2  | 11 | 2  | 3 | 14  |
| 1  | 24 | 7  | 86 | 24 | 1 | 19  |
| 1  | 15 | 8  | 60 | 22 | 1 | 5   |
| 1  | 44 | 8  | 18 | 25 | 0 | 6   |
| 4  | 34 | 19 | 75 | 10 | 0 | 21  |
| 5  | 23 | 20 | 36 | 4  | 2 | 88  |
| 7  | 5  | 10 | 22 | 0  | 9 | 124 |
| 1  | 19 | 5  | 31 | 15 | 0 | 9   |
| 3  | 3  | 0  | 10 | 0  | 0 | 60  |
| 0  | 39 | 14 | 59 | 11 | 5 | 33  |
| 0  | 12 | 2  | 33 | 3  | 2 | 13  |
| 1  | 12 | 10 | 25 | 9  | 0 | 32  |
| 0  | 9  | 5  | 40 | 2  | 3 | 39  |
| 9  | 31 | 14 | 47 | 2  | 4 | 148 |
| 1  | 28 | 7  | 24 | 0  | 1 | 37  |
| 3  | 27 | 9  | 32 | 7  | 3 | 12  |
| 2  | 22 | 7  | 9  | 1  | 9 | 18  |
| 0  | 32 | 8  | 57 | 0  | 2 | 120 |
| 7  | 8  | 0  | 12 | 1  | 2 | 65  |
| 1  | 19 | 12 | 16 | 0  | 2 | 52  |
| 1  | 19 | 12 | 16 | 0  | 2 | 52  |
| 1  | 12 | 5  | 11 | 8  | 2 | 14  |
| 4  | 47 | 19 | 49 | 7  | 0 | 10  |
| 3  | 8  | 9  | 19 | 1  | 0 | 22  |
| 1  | 12 | 6  | 6  | 0  | 2 | 12  |
| 4  | 25 | 3  | 42 | 1  | 0 | 13  |
| 3  | 65 | 5  | 35 | 2  | 1 | 26  |
| 3  | 4  | 7  | 33 | 2  | 6 | 64  |
| 3  | 16 | 9  | 20 | 13 | 2 | 14  |
| 1  | 3  | 5  | 48 | 4  | 1 | 8   |
| 11 | 36 | 18 | 24 | 1  | 2 | 16  |
| 4  | 19 | 8  | 27 | 1  | 0 | 3   |
| 1  | 34 | 7  | 94 | 12 | 5 | 39  |
| 5  | 12 | 14 | 26 | 3  | 2 | 59  |
| 1  | 0  | 1  | 1  | 2  | 0 | 15  |
| 3  | 25 | 9  | 22 | 3  | 0 | 41  |
| 2  | 4  | 2  | 24 | 1  | 0 | 30  |
| 2  | 10 | 10 | 50 | 8  | 0 | 8   |
| 3  | 16 | 17 | 14 | 47 | 0 | 10  |
| 1  | 1  | 2  | 22 | 1  | 0 | 28  |
| 6  | 6  | 2  | 15 | 4  | 0 | 32  |
| 5  | 9  | 4  | 20 | 4  | 0 | 7   |
| 1  | 7  | 2  | 18 | 1  | 1 | 34  |
| 3  | 21 | 4  | 23 | 25 | 0 | 23  |
| 0  | 3  | 4  | 1  | 1  | 0 | 13  |
| 0  | 7  | 1  | 71 | 8  | 0 | 3   |
| 2  | 25 | 11 | 22 | 27 | 0 | 10  |
| 1  | 28 | 6  | 8  | 20 | 0 | 19  |
| 1  | 27 | 3  | 12 | 4  | 2 | 13  |
| 3  | 7  | 5  | 17 | 0  | 2 | 23  |
| 0  | 0  | 1  | 1  | 0  | 0 | 10  |
| 4  | 11 | 20 | 33 | 1  | 2 | 8   |
| 1  | 13 | 6  | 22 | 0  | 2 | 56  |
| 0  | 7  | 9  | 32 | 64 | 3 | 43  |
| 0  | 15 | 6  | 21 | 15 | 0 | 9   |
| 0  | 5  | 5  | 51 | 3  | 1 | 31  |
| 6  | 21 | 7  | 26 | 8  | 1 | 12  |

|   |    |    |    |    |   |    |
|---|----|----|----|----|---|----|
| 3 | 24 | 11 | 12 | 1  | 0 | 13 |
| 2 | 16 | 7  | 30 | 1  | 0 | 18 |
| 0 | 7  | 1  | 7  | 4  | 5 | 7  |
| 1 | 22 | 9  | 33 | 5  | 2 | 15 |
| 1 | 19 | 5  | 26 | 4  | 1 | 11 |
| 2 | 20 | 1  | 31 | 7  | 0 | 5  |
| 1 | 13 | 3  | 21 | 0  | 1 | 47 |
| 3 | 18 | 8  | 8  | 3  | 3 | 30 |
| 1 | 0  | 0  | 2  | 0  | 1 | 23 |
| 2 | 3  | 6  | 9  | 0  | 2 | 10 |
| 1 | 2  | 0  | 91 | 0  | 1 | 13 |
| 0 | 19 | 14 | 14 | 5  | 3 | 1  |
| 0 | 12 | 11 | 19 | 0  | 4 | 71 |
| 0 | 17 | 6  | 22 | 4  | 1 | 15 |
| 1 | 7  | 3  | 6  | 3  | 0 | 5  |
| 1 | 6  | 3  | 7  | 1  | 0 | 32 |
| 3 | 9  | 4  | 9  | 16 | 0 | 4  |
| 0 | 8  | 3  | 27 | 1  | 1 | 18 |
| 1 | 16 | 4  | 24 | 2  | 3 | 12 |
| 0 | 7  | 3  | 7  | 0  | 3 | 13 |
| 0 | 11 | 1  | 6  | 10 | 0 | 6  |
| 3 | 12 | 2  | 35 | 3  | 0 | 4  |
| 0 | 32 | 7  | 28 | 3  | 0 | 6  |
| 0 | 10 | 7  | 10 | 40 | 0 | 8  |
| 0 | 8  | 1  | 20 | 2  | 0 | 17 |
| 1 | 14 | 5  | 36 | 7  | 0 | 8  |
| 0 | 9  | 3  | 36 | 1  | 0 | 16 |
| 0 | 10 | 4  | 26 | 9  | 2 | 22 |
| 0 | 36 | 12 | 28 | 0  | 0 | 16 |
| 0 | 10 | 0  | 20 | 2  | 0 | 15 |
| 0 | 12 | 4  | 6  | 7  | 1 | 10 |
| 1 | 3  | 0  | 2  | 2  | 0 | 14 |
| 1 | 1  | 1  | 0  | 0  | 0 | 16 |
| 0 | 13 | 2  | 3  | 1  | 2 | 25 |
| 3 | 4  | 7  | 13 | 1  | 0 | 11 |
| 1 | 18 | 15 | 9  | 9  | 2 | 19 |
| 0 | 13 | 7  | 22 | 0  | 1 | 17 |
| 0 | 14 | 10 | 13 | 0  | 0 | 7  |
| 1 | 4  | 0  | 9  | 3  | 0 | 5  |
| 1 | 17 | 3  | 34 | 1  | 0 | 4  |
| 2 | 2  | 1  | 10 | 0  | 1 | 18 |
| 1 | 15 | 2  | 19 | 1  | 0 | 6  |
| 0 | 9  | 0  | 2  | 1  | 2 | 1  |
| 1 | 14 | 5  | 14 | 4  | 0 | 3  |
| 0 | 5  | 0  | 4  | 1  | 0 | 16 |
| 4 | 0  | 2  | 7  | 8  | 4 | 42 |
| 0 | 19 | 2  | 12 | 10 | 1 | 17 |
| 1 | 2  | 2  | 1  | 0  | 3 | 13 |
| 0 | 13 | 4  | 9  | 8  | 1 | 16 |
| 2 | 16 | 4  | 33 | 3  | 2 | 5  |
| 0 | 10 | 2  | 5  | 5  | 2 | 1  |
| 0 | 1  | 0  | 3  | 0  | 0 | 27 |
| 1 | 24 | 5  | 15 | 8  | 0 | 9  |
| 4 | 1  | 1  | 3  | 0  | 0 | 13 |
| 2 | 10 | 2  | 12 | 3  | 0 | 3  |
| 1 | 3  | 4  | 20 | 3  | 1 | 15 |
| 0 | 30 | 2  | 18 | 3  | 0 | 2  |
| 0 | 0  | 0  | 1  | 0  | 0 | 4  |
| 1 | 3  | 5  | 9  | 3  | 0 | 6  |

|    |    |    |    |   |   |    |
|----|----|----|----|---|---|----|
| 0  | 12 | 2  | 9  | 7 | 1 | 18 |
| 0  | 14 | 5  | 14 | 6 | 0 | 2  |
| 0  | 2  | 3  | 19 | 2 | 2 | 10 |
| 1  | 18 | 10 | 14 | 2 | 1 | 13 |
| 0  | 12 | 2  | 6  | 2 | 2 | 6  |
| 0  | 1  | 1  | 14 | 1 | 1 | 2  |
| 1  | 5  | 3  | 15 | 6 | 1 | 7  |
| 0  | 2  | 0  | 0  | 0 | 0 | 18 |
| 1  | 4  | 2  | 6  | 0 | 0 | 21 |
| 0  | 7  | 6  | 13 | 0 | 0 | 11 |
| 1  | 19 | 6  | 8  | 1 | 2 | 9  |
| 0  | 3  | 2  | 14 | 0 | 0 | 3  |
| 21 | 15 | 4  | 17 | 3 | 1 | 11 |
| 0  | 1  | 1  | 1  | 0 | 0 | 48 |
| 2  | 5  | 1  | 12 | 1 | 0 | 2  |
| 0  | 6  | 5  | 4  | 1 | 1 | 33 |
| 0  | 2  | 2  | 19 | 0 | 0 | 14 |
| 0  | 11 | 2  | 8  | 1 | 1 | 7  |
| 0  | 3  | 5  | 5  | 0 | 0 | 21 |
| 2  | 6  | 4  | 10 | 0 | 0 | 22 |
| 0  | 9  | 1  | 17 | 1 | 2 | 26 |
| 0  | 14 | 3  | 11 | 0 | 1 | 12 |
| 0  | 0  | 0  | 16 | 0 | 0 | 5  |
| 0  | 6  | 4  | 13 | 5 | 0 | 6  |
| 1  | 3  | 5  | 3  | 5 | 0 | 4  |
| 0  | 0  | 0  | 15 | 4 | 0 | 11 |
| 0  | 1  | 1  | 3  | 0 | 0 | 5  |
| 2  | 2  | 0  | 6  | 0 | 0 | 18 |
| 0  | 9  | 4  | 10 | 0 | 2 | 4  |
| 0  | 19 | 3  | 8  | 0 | 0 | 0  |
| 0  | 1  | 0  | 1  | 2 | 0 | 7  |
| 2  | 6  | 1  | 9  | 3 | 0 | 4  |
| 0  | 3  | 0  | 8  | 0 | 0 | 6  |
| 0  | 0  | 0  | 9  | 7 | 0 | 2  |
| 0  | 2  | 1  | 4  | 0 | 0 | 2  |
| 0  | 4  | 2  | 2  | 2 | 1 | 4  |
| 0  | 5  | 5  | 8  | 0 | 0 | 9  |
| 0  | 5  | 7  | 3  | 7 | 0 | 2  |
| 1  | 11 | 2  | 6  | 1 | 0 | 3  |
| 0  | 10 | 2  | 11 | 4 | 0 | 0  |
| 0  | 8  | 1  | 12 | 3 | 0 | 0  |
| 0  | 0  | 0  | 5  | 1 | 0 | 4  |
| 0  | 2  | 2  | 3  | 0 | 1 | 4  |
| 0  | 7  | 0  | 6  | 2 | 0 | 2  |
| 0  | 1  | 1  | 22 | 0 | 1 | 6  |
| 1  | 13 | 8  | 5  | 1 | 0 | 7  |
| 0  | 1  | 0  | 9  | 1 | 0 | 7  |
| 0  | 5  | 3  | 7  | 5 | 0 | 1  |
| 0  | 3  | 2  | 5  | 0 | 1 | 12 |
| 0  | 2  | 0  | 1  | 0 | 0 | 0  |
| 0  | 11 | 0  | 10 | 1 | 0 | 4  |
| 0  | 3  | 0  | 0  | 0 | 0 | 2  |
| 0  | 0  | 3  | 1  | 0 | 0 | 15 |
| 0  | 14 | 6  | 9  | 1 | 1 | 10 |
| 0  | 3  | 0  | 7  | 0 | 0 | 3  |
| 0  | 1  | 2  | 2  | 0 | 0 | 12 |
| 0  | 4  | 0  | 7  | 0 | 1 | 6  |
| 0  | 2  | 5  | 9  | 1 | 0 | 5  |
| 0  | 22 | 1  | 0  | 0 | 0 | 0  |

|   |   |   |    |    |   |    |
|---|---|---|----|----|---|----|
| 1 | 0 | 1 | 0  | 0  | 0 | 5  |
| 0 | 8 | 2 | 4  | 0  | 0 | 11 |
| 0 | 0 | 0 | 3  | 0  | 1 | 3  |
| 0 | 0 | 0 | 5  | 0  | 0 | 1  |
| 0 | 1 | 2 | 5  | 1  | 0 | 4  |
| 0 | 3 | 2 | 5  | 6  | 0 | 0  |
| 0 | 4 | 6 | 4  | 4  | 1 | 5  |
| 0 | 1 | 0 | 6  | 0  | 1 | 4  |
| 0 | 3 | 0 | 6  | 4  | 0 | 1  |
| 0 | 2 | 0 | 5  | 0  | 2 | 6  |
| 0 | 0 | 2 | 1  | 0  | 1 | 22 |
| 0 | 0 | 0 | 0  | 0  | 0 | 0  |
| 0 | 0 | 0 | 0  | 0  | 0 | 0  |
| 0 | 6 | 0 | 2  | 0  | 0 | 8  |
| 0 | 0 | 1 | 9  | 1  | 0 | 3  |
| 0 | 2 | 2 | 1  | 0  | 0 | 9  |
| 1 | 2 | 2 | 3  | 6  | 1 | 1  |
| 0 | 2 | 1 | 1  | 1  | 0 | 7  |
| 0 | 0 | 0 | 0  | 0  | 0 | 1  |
| 1 | 1 | 0 | 1  | 0  | 0 | 7  |
| 0 | 2 | 2 | 0  | 0  | 0 | 14 |
| 0 | 1 | 6 | 1  | 0  | 0 | 18 |
| 1 | 2 | 1 | 5  | 2  | 0 | 0  |
| 0 | 9 | 2 | 3  | 1  | 0 | 2  |
| 0 | 2 | 0 | 6  | 3  | 2 | 0  |
| 0 | 0 | 0 | 0  | 0  | 0 | 3  |
| 0 | 2 | 0 | 5  | 0  | 0 | 6  |
| 1 | 4 | 0 | 1  | 0  | 0 | 4  |
| 0 | 1 | 0 | 1  | 3  | 0 | 2  |
| 0 | 5 | 2 | 1  | 0  | 0 | 3  |
| 0 | 0 | 1 | 3  | 0  | 0 | 14 |
| 0 | 4 | 0 | 5  | 0  | 0 | 1  |
| 0 | 1 | 2 | 3  | 3  | 0 | 4  |
| 0 | 2 | 0 | 3  | 24 | 0 | 0  |
| 1 | 6 | 3 | 4  | 1  | 0 | 4  |
| 0 | 1 | 1 | 3  | 0  | 0 | 4  |
| 0 | 1 | 0 | 8  | 3  | 0 | 0  |
| 0 | 5 | 1 | 2  | 1  | 0 | 3  |
| 0 | 5 | 2 | 4  | 0  | 1 | 6  |
| 1 | 3 | 0 | 0  | 1  | 0 | 5  |
| 0 | 0 | 0 | 0  | 0  | 0 | 3  |
| 1 | 4 | 4 | 4  | 1  | 0 | 7  |
| 1 | 0 | 1 | 3  | 1  | 0 | 5  |
| 0 | 2 | 0 | 3  | 2  | 0 | 0  |
| 1 | 7 | 3 | 3  | 1  | 1 | 6  |
| 1 | 0 | 0 | 0  | 0  | 0 | 3  |
| 1 | 1 | 0 | 0  | 0  | 0 | 3  |
| 0 | 3 | 2 | 6  | 0  | 0 | 3  |
| 0 | 2 | 1 | 2  | 2  | 0 | 0  |
| 0 | 1 | 0 | 7  | 0  | 0 | 4  |
| 1 | 1 | 1 | 4  | 0  | 0 | 1  |
| 0 | 1 | 0 | 0  | 1  | 0 | 6  |
| 2 | 2 | 0 | 5  | 1  | 0 | 0  |
| 0 | 2 | 1 | 1  | 0  | 1 | 6  |
| 1 | 0 | 1 | 3  | 0  | 0 | 2  |
| 0 | 1 | 1 | 14 | 0  | 0 | 4  |
| 0 | 4 | 1 | 0  | 0  | 0 | 7  |
| 0 | 2 | 0 | 1  | 1  | 0 | 0  |
| 0 | 3 | 2 | 3  | 0  | 0 | 2  |

|   |    |   |    |   |   |    |
|---|----|---|----|---|---|----|
| 0 | 12 | 0 | 2  | 0 | 0 | 0  |
| 0 | 6  | 1 | 6  | 3 | 0 | 0  |
| 0 | 3  | 1 | 3  | 1 | 2 | 0  |
| 0 | 3  | 1 | 9  | 0 | 0 | 14 |
| 0 | 2  | 0 | 1  | 0 | 0 | 2  |
| 0 | 1  | 0 | 1  | 0 | 0 | 10 |
| 0 | 2  | 1 | 7  | 0 | 0 | 0  |
| 0 | 1  | 1 | 0  | 0 | 0 | 1  |
| 0 | 2  | 1 | 3  | 0 | 0 | 2  |
| 0 | 2  | 1 | 0  | 0 | 0 | 18 |
| 0 | 2  | 4 | 0  | 3 | 1 | 1  |
| 0 | 0  | 1 | 0  | 0 | 0 | 2  |
| 0 | 0  | 0 | 2  | 0 | 0 | 9  |
| 0 | 3  | 0 | 2  | 3 | 1 | 0  |
| 0 | 0  | 3 | 0  | 1 | 0 | 2  |
| 2 | 1  | 0 | 2  | 0 | 0 | 4  |
| 1 | 2  | 1 | 1  | 0 | 0 | 3  |
| 0 | 0  | 0 | 0  | 0 | 0 | 1  |
| 0 | 0  | 0 | 0  | 0 | 0 | 3  |
| 0 | 1  | 2 | 4  | 1 | 0 | 6  |
| 0 | 3  | 1 | 2  | 0 | 0 | 6  |
| 0 | 0  | 0 | 2  | 0 | 0 | 6  |
| 0 | 0  | 0 | 1  | 0 | 0 | 5  |
| 1 | 6  | 2 | 4  | 0 | 0 | 1  |
| 0 | 3  | 2 | 6  | 0 | 0 | 0  |
| 0 | 0  | 0 | 4  | 0 | 0 | 1  |
| 0 | 1  | 0 | 2  | 1 | 0 | 1  |
| 0 | 0  | 0 | 5  | 1 | 0 | 0  |
| 0 | 2  | 0 | 0  | 0 | 0 | 2  |
| 1 | 2  | 2 | 0  | 0 | 0 | 10 |
| 1 | 0  | 0 | 0  | 0 | 0 | 2  |
| 1 | 7  | 2 | 1  | 2 | 0 | 1  |
| 1 | 2  | 0 | 4  | 0 | 0 | 1  |
| 0 | 11 | 4 | 1  | 0 | 0 | 0  |
| 0 | 2  | 2 | 4  | 0 | 1 | 3  |
| 0 | 2  | 1 | 1  | 0 | 0 | 6  |
| 0 | 1  | 0 | 2  | 1 | 0 | 0  |
| 0 | 5  | 0 | 0  | 0 | 0 | 3  |
| 0 | 0  | 2 | 4  | 0 | 0 | 2  |
| 0 | 0  | 0 | 10 | 0 | 0 | 0  |
| 0 | 2  | 0 | 4  | 0 | 1 | 13 |
| 1 | 1  | 2 | 1  | 2 | 0 | 2  |
| 0 | 1  | 0 | 1  | 1 | 0 | 1  |
| 0 | 4  | 0 | 6  | 2 | 0 | 0  |
| 0 | 1  | 1 | 2  | 0 | 0 | 2  |
| 0 | 0  | 0 | 1  | 2 | 0 | 0  |
| 0 | 0  | 0 | 3  | 0 | 0 | 1  |
| 0 | 1  | 0 | 1  | 1 | 0 | 0  |
| 0 | 1  | 1 | 1  | 1 | 0 | 0  |
| 0 | 2  | 0 | 3  | 8 | 0 | 2  |
| 0 | 2  | 1 | 6  | 1 | 0 | 1  |
| 0 | 1  | 0 | 4  | 0 | 0 | 0  |
| 0 | 0  | 0 | 0  | 1 | 0 | 10 |
| 0 | 0  | 0 | 8  | 0 | 0 | 12 |
| 0 | 3  | 0 | 1  | 2 | 0 | 2  |
| 0 | 0  | 0 | 0  | 1 | 0 | 2  |
| 0 | 2  | 1 | 5  | 1 | 0 | 1  |
| 0 | 1  | 1 | 4  | 0 | 0 | 0  |
| 0 | 3  | 1 | 0  | 0 | 0 | 4  |

|        |         |         |         |         |        |         |
|--------|---------|---------|---------|---------|--------|---------|
| 0      | 1       | 0       | 10      | 0       | 0      | 3       |
| 0      | 2       | 2       | 4       | 0       | 0      | 2       |
| 0      | 1       | 1       | 0       | 0       | 0      | 0       |
| 0      | 2       | 1       | 1       | 1       | 0      | 0       |
| 0      | 0       | 0       | 11      | 0       | 0      | 0       |
| 0      | 2       | 0       | 2       | 1       | 0      | 1       |
| 0      | 2       | 1       | 2       | 1       | 0      | 0       |
| 0      | 6       | 2       | 1       | 1       | 0      | 1       |
| 0      | 3       | 1       | 0       | 2       | 0      | 2       |
| 0      | 2       | 1       | 1       | 1       | 0      | 0       |
| 0      | 1       | 0       | 8       | 2       | 0      | 1       |
| 1      | 1       | 2       | 0       | 1       | 0      | 1       |
| 1      | 0       | 0       | 0       | 2       | 0      | 0       |
| B_30   | B_33    | C_2     | C_37    | C_38    | C_39   | C_43    |
| CHR_NP | CHR_NP  | CHR_NP  | CHR_NP  | CHR_NP  | CHR_NP | CHR_NP  |
| 703580 | 2657625 | 1653964 | 1652372 | 2698648 | 110526 | 3656632 |
| 26     | 19      | 22      | 12      | 23      | 14     | 21      |
| 1.03   | -0.59   | 0.24    | -2.03   | 0.42    | -1.59  | -0.12   |



|         |        |        |         |         |        |        |
|---------|--------|--------|---------|---------|--------|--------|
| 0.90    | 0.12   | 0.08   | 0.02    | 0.34    | 0.93   | 0.94   |
| 8       | 30     | 31     | 37      | 20      | 6      | 4      |
| 1       | 1      | 1      | 1       | 1       | 1      | 1      |
| 36      | 37     | 38     | 39      | 40      | 41     | 42     |
| 9       | 10     | 11     | 12      | 13      | 14     | 15     |
| C_37    | C_38   | C_39   | C_43    | C_48    | D_10   | D_12   |
| CHR_NP  | CHR_NP | CHR_NP | CHR_NP  | CHR_NP  | CHR_NP | CHR_NP |
| 2915691 | 932164 | 148130 | 2018570 | 2072241 | 727386 | 206047 |
| C_37    | C_38   | C_39   | C_43    | C_48    | D_10   | D_12   |
| 1119107 | 698786 | 56414  | 382904  | 593526  | 308682 | 28125  |
| 107450  | 11085  | 4692   | 49604   | 152869  | 23073  | 6563   |
| 527415  | 18116  | 13820  | 77016   | 385992  | 63225  | 24309  |
| 186072  | 37780  | 6531   | 62996   | 114740  | 11822  | 2047   |
| 221867  | 36882  | 11931  | 143942  | 254736  | 89228  | 33653  |
| 22930   | 3941   | 3244   | 97556   | 27400   | 2763   | 381    |
| 94903   | 4076   | 6644   | 91561   | 104908  | 22052  | 6808   |
| 5144    | 336    | 1560   | 352009  | 7545    | 2512   | 2325   |
| 20714   | 1927   | 1860   | 50045   | 22013   | 4185   | 2552   |
| 60783   | 6245   | 7346   | 116265  | 23827   | 6144   | 1172   |
| 32180   | 6565   | 5855   | 75495   | 12756   | 23750  | 19091  |
| 36680   | 7874   | 1869   | 28048   | 35505   | 8613   | 2253   |
| 49017   | 1645   | 2208   | 28494   | 21950   | 4686   | 1683   |
| 24453   | 24432  | 1247   | 16962   | 18735   | 15532  | 6102   |
| 8257    | 694    | 1172   | 28299   | 10207   | 613    | 202    |
| 39192   | 13559  | 450    | 5400    | 12774   | 8711   | 4731   |
| 9621    | 146    | 686    | 21808   | 9339    | 790    | 192    |
| 12394   | 826    | 1168   | 18331   | 12358   | 5454   | 2635   |
| 15407   | 717    | 918    | 26233   | 13684   | 609    | 126    |

|       |       |      |       |       |       |      |
|-------|-------|------|-------|-------|-------|------|
| 24919 | 1038  | 1631 | 17880 | 15631 | 6584  | 1697 |
| 20190 | 1251  | 1020 | 15754 | 16830 | 6083  | 3941 |
| 9877  | 1143  | 841  | 20274 | 7357  | 1802  | 494  |
| 11176 | 292   | 1148 | 13470 | 4425  | 990   | 270  |
| 12983 | 77    | 333  | 16065 | 13111 | 467   | 230  |
| 6261  | 89    | 832  | 10359 | 8660  | 1201  | 676  |
| 15706 | 1088  | 781  | 6546  | 6792  | 2657  | 1291 |
| 9772  | 5049  | 303  | 3559  | 5710  | 8014  | 7864 |
| 849   | 240   | 517  | 11574 | 2119  | 1372  | 413  |
| 5551  | 587   | 227  | 4758  | 4318  | 1315  | 494  |
| 10136 | 844   | 393  | 5438  | 4042  | 7254  | 2374 |
| 9819  | 441   | 586  | 7562  | 9334  | 1073  | 264  |
| 10464 | 3285  | 188  | 2775  | 7112  | 1333  | 440  |
| 4123  | 191   | 168  | 8470  | 3775  | 1146  | 644  |
| 2212  | 114   | 567  | 22075 | 2250  | 973   | 258  |
| 5155  | 548   | 208  | 4446  | 4019  | 1204  | 459  |
| 6463  | 2315  | 359  | 6902  | 5146  | 2115  | 172  |
| 5083  | 425   | 812  | 14383 | 4433  | 1060  | 646  |
| 4974  | 193   | 455  | 9827  | 3480  | 769   | 665  |
| 8506  | 602   | 173  | 2542  | 4769  | 6449  | 1347 |
| 10639 | 14956 | 57   | 691   | 7744  | 9122  | 3042 |
| 10287 | 568   | 251  | 3486  | 6633  | 10386 | 2733 |
| 8284  | 774   | 317  | 3949  | 8448  | 3106  | 999  |
| 5680  | 1033  | 99   | 2057  | 2888  | 3292  | 742  |
| 672   | 66    | 204  | 5936  | 1156  | 220   | 90   |
| 6637  | 148   | 185  | 10804 | 7260  | 1532  | 1263 |
| 6740  | 861   | 199  | 2797  | 3352  | 978   | 839  |
| 3002  | 208   | 131  | 4229  | 2009  | 1205  | 1306 |
| 3092  | 1921  | 111  | 879   | 3270  | 1891  | 1190 |
| 227   | 80    | 7    | 485   | 135   | 32    | 32   |
| 2038  | 43    | 333  | 5425  | 1169  | 758   | 464  |
| 741   | 308   | 177  | 1261  | 918   | 1652  | 870  |
| 2395  | 53    | 267  | 5813  | 3210  | 754   | 231  |
| 1818  | 379   | 160  | 2939  | 1434  | 3074  | 2195 |
| 2899  | 117   | 243  | 2661  | 2549  | 85    | 37   |
| 2193  | 110   | 149  | 1297  | 1239  | 1707  | 698  |
| 205   | 19    | 58   | 2116  | 113   | 79    | 29   |
| 1974  | 277   | 83   | 3015  | 1573  | 657   | 362  |
| 2658  | 128   | 111  | 2724  | 2705  | 111   | 65   |
| 4160  | 175   | 194  | 3000  | 2566  | 219   | 72   |
| 1502  | 354   | 43   | 668   | 2358  | 658   | 360  |
| 3150  | 172   | 202  | 4586  | 1390  | 1142  | 1023 |
| 2575  | 92    | 164  | 3392  | 2349  | 809   | 669  |
| 261   | 28    | 30   | 2396  | 150   | 8     | 15   |
| 431   | 30    | 17   | 309   | 108   | 25    | 13   |
| 724   | 3378  | 35   | 294   | 515   | 234   | 92   |
| 640   | 51    | 63   | 2082  | 552   | 174   | 42   |
| 537   | 33    | 237  | 4285  | 745   | 176   | 85   |
| 292   | 9     | 34   | 1456  | 232   | 116   | 21   |
| 1126  | 12    | 88   | 2265  | 899   | 1027  | 513  |
| 254   | 70    | 15   | 769   | 331   | 143   | 14   |
| 2383  | 633   | 135  | 1280  | 1080  | 831   | 161  |
| 1528  | 1881  | 58   | 498   | 412   | 791   | 212  |
| 207   | 26    | 68   | 2189  | 265   | 61    | 48   |
| 1318  | 121   | 95   | 2107  | 512   | 224   | 76   |
| 1376  | 19    | 32   | 1048  | 1116  | 95    | 20   |
| 361   | 228   | 126  | 911   | 618   | 491   | 265  |
| 878   | 127   | 41   | 517   | 747   | 835   | 328  |
| 414   | 86    | 23   | 635   | 416   | 400   | 388  |

|      |     |     |      |     |      |      |
|------|-----|-----|------|-----|------|------|
| 1539 | 640 | 24  | 352  | 921 | 780  | 301  |
| 1370 | 103 | 194 | 2209 | 834 | 208  | 124  |
| 761  | 153 | 19  | 631  | 813 | 107  | 59   |
| 1591 | 252 | 41  | 620  | 834 | 855  | 493  |
| 1085 | 713 | 24  | 169  | 787 | 147  | 11   |
| 341  | 8   | 209 | 5325 | 197 | 33   | 4    |
| 464  | 19  | 16  | 1258 | 400 | 175  | 197  |
| 1293 | 65  | 60  | 1721 | 702 | 2554 | 2880 |
| 1114 | 522 | 30  | 329  | 564 | 1136 | 1039 |
| 205  | 12  | 15  | 1000 | 224 | 13   | 6    |
| 1331 | 49  | 34  | 507  | 516 | 65   | 45   |
| 746  | 163 | 17  | 181  | 448 | 304  | 145  |
| 1017 | 64  | 31  | 490  | 856 | 347  | 152  |
| 56   | 22  | 4   | 158  | 9   | 21   | 16   |
| 1035 | 56  | 15  | 195  | 633 | 291  | 130  |
| 286  | 14  | 23  | 500  | 181 | 24   | 15   |
| 104  | 14  | 14  | 1025 | 107 | 41   | 8    |
| 426  | 16  | 28  | 540  | 618 | 132  | 46   |
| 812  | 237 | 24  | 107  | 554 | 240  | 121  |
| 433  | 184 | 33  | 231  | 429 | 423  | 274  |
| 831  | 69  | 35  | 232  | 824 | 448  | 124  |
| 84   | 6   | 15  | 806  | 65  | 10   | 4    |
| 879  | 13  | 41  | 884  | 492 | 887  | 245  |
| 389  | 32  | 24  | 220  | 304 | 45   | 23   |
| 1220 | 189 | 20  | 273  | 688 | 510  | 399  |
| 374  | 9   | 24  | 810  | 465 | 28   | 20   |
| 171  | 24  | 41  | 414  | 200 | 31   | 9    |
| 101  | 5   | 13  | 1136 | 106 | 26   | 14   |
| 555  | 47  | 13  | 291  | 436 | 998  | 754  |
| 307  | 15  | 28  | 486  | 387 | 66   | 11   |
| 154  | 14  | 13  | 586  | 110 | 98   | 18   |
| 112  | 8   | 10  | 272  | 117 | 345  | 105  |
| 367  | 20  | 26  | 707  | 502 | 6    | 9    |
| 770  | 55  | 20  | 263  | 386 | 167  | 57   |
| 460  | 15  | 36  | 724  | 310 | 670  | 329  |
| 58   | 8   | 9   | 324  | 86  | 28   | 6    |
| 1363 | 16  | 40  | 503  | 524 | 70   | 109  |
| 1481 | 117 | 17  | 154  | 256 | 58   | 34   |
| 236  | 43  | 17  | 521  | 329 | 31   | 20   |
| 125  | 9   | 11  | 283  | 113 | 75   | 34   |
| 125  | 9   | 11  | 283  | 113 | 75   | 34   |
| 504  | 19  | 20  | 740  | 613 | 17   | 4    |
| 227  | 70  | 17  | 353  | 128 | 332  | 286  |
| 498  | 53  | 12  | 279  | 276 | 17   | 8    |
| 39   | 10  | 25  | 182  | 88  | 9    | 0    |
| 205  | 7   | 20  | 422  | 266 | 30   | 19   |
| 85   | 4   | 3   | 100  | 28  | 39   | 21   |
| 250  | 54  | 17  | 149  | 209 | 96   | 69   |
| 279  | 18  | 5   | 178  | 206 | 390  | 617  |
| 308  | 21  | 13  | 139  | 260 | 58   | 28   |
| 293  | 12  | 3   | 139  | 126 | 282  | 245  |
| 301  | 20  | 1   | 59   | 158 | 79   | 13   |
| 42   | 10  | 1   | 70   | 41  | 180  | 45   |
| 169  | 3   | 8   | 215  | 232 | 84   | 41   |
| 124  | 6   | 11  | 279  | 122 | 30   | 45   |
| 288  | 28  | 21  | 200  | 103 | 385  | 217  |
| 112  | 2   | 4   | 183  | 64  | 169  | 229  |
| 215  | 16  | 18  | 405  | 188 | 62   | 60   |
| 200  | 30  | 14  | 206  | 70  | 36   | 30   |



|     |     |    |     |     |     |     |
|-----|-----|----|-----|-----|-----|-----|
| 71  | 18  | 5  | 349 | 58  | 88  | 147 |
| 116 | 4   | 4  | 98  | 86  | 5   | 13  |
| 202 | 22  | 6  | 175 | 119 | 145 | 139 |
| 225 | 55  | 5  | 67  | 136 | 118 | 49  |
| 159 | 38  | 9  | 176 | 124 | 38  | 19  |
| 229 | 267 | 7  | 36  | 250 | 168 | 81  |
| 177 | 7   | 4  | 65  | 80  | 36  | 12  |
| 26  | 4   | 0  | 197 | 10  | 19  | 26  |
| 50  | 118 | 4  | 57  | 57  | 67  | 39  |
| 392 | 26  | 6  | 69  | 201 | 31  | 2   |
| 99  | 6   | 4  | 67  | 77  | 4   | 1   |
| 99  | 64  | 5  | 45  | 117 | 21  | 10  |
| 131 | 19  | 3  | 61  | 61  | 217 | 78  |
| 121 | 6   | 12 | 205 | 114 | 50  | 18  |
| 43  | 11  | 4  | 177 | 46  | 24  | 20  |
| 11  | 2   | 9  | 167 | 36  | 9   | 0   |
| 230 | 20  | 2  | 38  | 161 | 45  | 12  |
| 102 | 8   | 4  | 155 | 226 | 9   | 2   |
| 78  | 73  | 2  | 116 | 30  | 92  | 63  |
| 57  | 5   | 0  | 103 | 81  | 27  | 25  |
| 160 | 17  | 9  | 214 | 64  | 193 | 86  |
| 210 | 10  | 8  | 94  | 82  | 119 | 92  |
| 49  | 61  | 6  | 38  | 19  | 69  | 71  |
| 20  | 0   | 1  | 26  | 3   | 3   | 3   |
| 211 | 13  | 13 | 210 | 156 | 214 | 116 |
| 130 | 63  | 4  | 61  | 72  | 138 | 71  |
| 93  | 1   | 13 | 169 | 66  | 22  | 6   |
| 78  | 1   | 4  | 159 | 74  | 27  | 33  |
| 79  | 154 | 7  | 73  | 62  | 89  | 31  |
| 172 | 14  | 2  | 86  | 84  | 13  | 1   |
| 37  | 28  | 15 | 153 | 95  | 312 | 223 |
| 31  | 0   | 3  | 95  | 54  | 2   | 0   |
| 40  | 21  | 1  | 118 | 25  | 21  | 10  |
| 149 | 1   | 9  | 110 | 151 | 271 | 79  |
| 133 | 4   | 13 | 146 | 51  | 124 | 23  |
| 133 | 36  | 8  | 21  | 166 | 16  | 12  |
| 113 | 4   | 6  | 84  | 102 | 17  | 1   |
| 57  | 0   | 4  | 86  | 88  | 12  | 1   |
| 176 | 27  | 2  | 17  | 77  | 389 | 116 |
| 13  | 9   | 12 | 81  | 17  | 58  | 48  |
| 77  | 3   | 6  | 97  | 76  | 35  | 24  |
| 111 | 1   | 9  | 312 | 64  | 105 | 62  |
| 28  | 11  | 8  | 94  | 40  | 157 | 29  |
| 146 | 44  | 6  | 132 | 103 | 22  | 12  |
| 39  | 1   | 1  | 128 | 22  | 9   | 6   |
| 5   | 12  | 11 | 49  | 18  | 93  | 40  |
| 49  | 2   | 4  | 124 | 52  | 4   | 1   |
| 61  | 43  | 5  | 50  | 28  | 41  | 20  |
| 126 | 89  | 3  | 30  | 82  | 115 | 118 |
| 39  | 1   | 0  | 112 | 22  | 9   | 5   |
| 33  | 3   | 16 | 95  | 29  | 35  | 7   |
| 93  | 11  | 5  | 112 | 70  | 31  | 69  |
| 109 | 5   | 0  | 98  | 76  | 14  | 7   |
| 0   | 3   | 0  | 0   | 2   | 36  | 51  |
| 11  | 3   | 5  | 589 | 24  | 1   | 0   |
| 83  | 0   | 5  | 87  | 77  | 24  | 18  |
| 83  | 52  | 3  | 5   | 83  | 13  | 2   |
| 83  | 20  | 5  | 65  | 31  | 20  | 13  |
| 287 | 4   | 3  | 51  | 49  | 34  | 28  |

|     |    |   |     |     |     |     |
|-----|----|---|-----|-----|-----|-----|
| 6   | 0  | 4 | 52  | 16  | 6   | 0   |
| 29  | 26 | 2 | 49  | 29  | 22  | 9   |
| 64  | 1  | 7 | 151 | 33  | 115 | 95  |
| 64  | 2  | 5 | 41  | 61  | 52  | 46  |
| 96  | 20 | 0 | 3   | 101 | 22  | 11  |
| 172 | 2  | 5 | 53  | 57  | 3   | 2   |
| 108 | 12 | 0 | 17  | 46  | 102 | 66  |
| 57  | 5  | 6 | 63  | 32  | 38  | 18  |
| 19  | 4  | 2 | 174 | 19  | 27  | 5   |
| 17  | 3  | 2 | 7   | 20  | 51  | 50  |
| 44  | 42 | 1 | 21  | 58  | 49  | 34  |
| 100 | 12 | 3 | 46  | 69  | 14  | 2   |
| 56  | 6  | 6 | 60  | 29  | 11  | 21  |
| 41  | 66 | 5 | 31  | 19  | 35  | 24  |
| 149 | 8  | 2 | 29  | 75  | 45  | 30  |
| 79  | 1  | 1 | 33  | 95  | 23  | 4   |
| 3   | 1  | 4 | 60  | 14  | 1   | 0   |
| 59  | 54 | 2 | 24  | 54  | 68  | 41  |
| 13  | 3  | 6 | 42  | 19  | 37  | 21  |
| 75  | 8  | 0 | 14  | 80  | 44  | 37  |
| 65  | 7  | 3 | 31  | 61  | 14  | 8   |
| 70  | 3  | 3 | 21  | 61  | 16  | 13  |
| 4   | 0  | 0 | 18  | 1   | 1   | 1   |
| 78  | 8  | 3 | 36  | 45  | 6   | 0   |
| 2   | 0  | 2 | 64  | 8   | 2   | 0   |
| 32  | 11 | 2 | 64  | 35  | 39  | 34  |
| 75  | 0  | 3 | 129 | 40  | 13  | 21  |
| 43  | 10 | 4 | 123 | 29  | 56  | 26  |
| 11  | 2  | 3 | 14  | 25  | 4   | 2   |
| 86  | 24 | 1 | 19  | 48  | 44  | 25  |
| 60  | 22 | 1 | 5   | 26  | 33  | 29  |
| 18  | 25 | 0 | 6   | 16  | 14  | 15  |
| 75  | 10 | 0 | 21  | 36  | 35  | 16  |
| 36  | 4  | 2 | 88  | 25  | 9   | 2   |
| 22  | 0  | 9 | 124 | 19  | 6   | 6   |
| 31  | 15 | 0 | 9   | 15  | 20  | 10  |
| 10  | 0  | 0 | 60  | 9   | 1   | 0   |
| 59  | 11 | 5 | 33  | 21  | 59  | 34  |
| 33  | 3  | 2 | 13  | 18  | 5   | 6   |
| 25  | 9  | 0 | 32  | 12  | 39  | 56  |
| 40  | 2  | 3 | 39  | 43  | 108 | 118 |
| 47  | 2  | 4 | 148 | 14  | 0   | 2   |
| 24  | 0  | 1 | 37  | 34  | 14  | 6   |
| 32  | 7  | 3 | 12  | 31  | 7   | 5   |
| 9   | 1  | 9 | 18  | 6   | 21  | 8   |
| 57  | 0  | 2 | 120 | 23  | 31  | 26  |
| 12  | 1  | 2 | 65  | 13  | 2   | 1   |
| 16  | 0  | 2 | 52  | 15  | 3   | 0   |
| 16  | 0  | 2 | 52  | 15  | 3   | 0   |
| 11  | 8  | 2 | 14  | 21  | 25  | 7   |
| 49  | 7  | 0 | 10  | 32  | 35  | 19  |
| 19  | 1  | 0 | 22  | 14  | 22  | 10  |
| 6   | 0  | 2 | 12  | 14  | 9   | 4   |
| 42  | 1  | 0 | 13  | 30  | 1   | 0   |
| 35  | 2  | 1 | 26  | 44  | 16  | 15  |
| 33  | 2  | 6 | 64  | 11  | 68  | 22  |
| 20  | 13 | 2 | 14  | 13  | 5   | 1   |
| 48  | 4  | 1 | 8   | 28  | 46  | 160 |
| 24  | 1  | 2 | 16  | 52  | 5   | 2   |

|    |    |   |    |    |    |    |
|----|----|---|----|----|----|----|
| 27 | 1  | 0 | 3  | 70 | 13 | 0  |
| 94 | 12 | 5 | 39 | 24 | 0  | 3  |
| 26 | 3  | 2 | 59 | 21 | 9  | 2  |
| 1  | 2  | 0 | 15 | 0  | 1  | 4  |
| 22 | 3  | 0 | 41 | 15 | 20 | 8  |
| 24 | 1  | 0 | 30 | 17 | 3  | 0  |
| 50 | 8  | 0 | 8  | 32 | 32 | 13 |
| 14 | 47 | 0 | 10 | 11 | 12 | 12 |
| 22 | 1  | 0 | 28 | 17 | 3  | 0  |
| 15 | 4  | 0 | 32 | 22 | 23 | 6  |
| 20 | 4  | 0 | 7  | 12 | 11 | 7  |
| 18 | 1  | 1 | 34 | 11 | 7  | 4  |
| 23 | 25 | 0 | 23 | 10 | 19 | 13 |
| 1  | 1  | 0 | 13 | 2  | 4  | 1  |
| 71 | 8  | 0 | 3  | 34 | 43 | 78 |
| 22 | 27 | 0 | 10 | 25 | 18 | 9  |
| 8  | 20 | 0 | 19 | 10 | 15 | 21 |
| 12 | 4  | 2 | 13 | 9  | 4  | 2  |
| 17 | 0  | 2 | 23 | 14 | 2  | 1  |
| 1  | 0  | 0 | 10 | 1  | 1  | 1  |
| 33 | 1  | 2 | 8  | 21 | 10 | 1  |
| 22 | 0  | 2 | 56 | 29 | 2  | 1  |
| 32 | 64 | 3 | 43 | 17 | 0  | 23 |
| 21 | 15 | 0 | 9  | 12 | 24 | 31 |
| 51 | 3  | 1 | 31 | 18 | 0  | 2  |
| 26 | 8  | 1 | 12 | 23 | 34 | 9  |
| 12 | 1  | 0 | 13 | 7  | 38 | 17 |
| 30 | 1  | 0 | 18 | 17 | 4  | 0  |
| 7  | 4  | 5 | 7  | 12 | 11 | 8  |
| 33 | 5  | 2 | 15 | 24 | 20 | 12 |
| 26 | 4  | 1 | 11 | 5  | 10 | 11 |
| 31 | 7  | 0 | 5  | 18 | 14 | 3  |
| 21 | 0  | 1 | 47 | 27 | 1  | 1  |
| 8  | 3  | 3 | 30 | 15 | 2  | 1  |
| 2  | 0  | 1 | 23 | 1  | 3  | 0  |
| 9  | 0  | 2 | 10 | 5  | 0  | 0  |
| 91 | 0  | 1 | 13 | 21 | 0  | 1  |
| 14 | 5  | 3 | 1  | 12 | 30 | 7  |
| 19 | 0  | 4 | 71 | 7  | 14 | 4  |
| 22 | 4  | 1 | 15 | 41 | 8  | 6  |
| 6  | 3  | 0 | 5  | 2  | 15 | 5  |
| 7  | 1  | 0 | 32 | 11 | 0  | 1  |
| 9  | 16 | 0 | 4  | 10 | 8  | 4  |
| 27 | 1  | 1 | 18 | 14 | 36 | 21 |
| 24 | 2  | 3 | 12 | 14 | 39 | 27 |
| 7  | 0  | 3 | 13 | 7  | 0  | 2  |
| 6  | 10 | 0 | 6  | 8  | 10 | 6  |
| 35 | 3  | 0 | 4  | 14 | 7  | 2  |
| 28 | 3  | 0 | 6  | 18 | 27 | 9  |
| 10 | 40 | 0 | 8  | 2  | 2  | 15 |
| 20 | 2  | 0 | 17 | 12 | 2  | 0  |
| 36 | 7  | 0 | 8  | 20 | 9  | 5  |
| 36 | 1  | 0 | 16 | 23 | 19 | 10 |
| 26 | 9  | 2 | 22 | 6  | 27 | 37 |
| 28 | 0  | 0 | 16 | 16 | 19 | 32 |
| 20 | 2  | 0 | 15 | 22 | 2  | 4  |
| 6  | 7  | 1 | 10 | 10 | 1  | 0  |
| 2  | 2  | 0 | 14 | 10 | 0  | 1  |
| 0  | 0  | 0 | 16 | 5  | 0  | 0  |

|    |    |   |    |    |    |    |
|----|----|---|----|----|----|----|
| 3  | 1  | 2 | 25 | 4  | 1  | 1  |
| 13 | 1  | 0 | 11 | 11 | 0  | 0  |
| 9  | 9  | 2 | 19 | 7  | 21 | 10 |
| 22 | 0  | 1 | 17 | 10 | 3  | 1  |
| 13 | 0  | 0 | 7  | 2  | 13 | 27 |
| 9  | 3  | 0 | 5  | 13 | 9  | 1  |
| 34 | 1  | 0 | 4  | 18 | 6  | 3  |
| 10 | 0  | 1 | 18 | 8  | 5  | 4  |
| 19 | 1  | 0 | 6  | 20 | 3  | 8  |
| 2  | 1  | 2 | 1  | 5  | 8  | 2  |
| 14 | 4  | 0 | 3  | 11 | 4  | 5  |
| 4  | 1  | 0 | 16 | 8  | 0  | 3  |
| 7  | 8  | 4 | 42 | 16 | 0  | 5  |
| 12 | 10 | 1 | 17 | 7  | 9  | 7  |
| 1  | 0  | 3 | 13 | 1  | 5  | 2  |
| 9  | 8  | 1 | 16 | 8  | 26 | 11 |
| 33 | 3  | 2 | 5  | 18 | 5  | 1  |
| 5  | 5  | 2 | 1  | 8  | 12 | 12 |
| 3  | 0  | 0 | 27 | 0  | 0  | 2  |
| 15 | 8  | 0 | 9  | 12 | 29 | 5  |
| 3  | 0  | 0 | 13 | 3  | 1  | 0  |
| 12 | 3  | 0 | 3  | 10 | 6  | 5  |
| 20 | 3  | 1 | 15 | 23 | 8  | 1  |
| 18 | 3  | 0 | 2  | 11 | 5  | 5  |
| 1  | 0  | 0 | 4  | 1  | 0  | 0  |
| 9  | 3  | 0 | 6  | 0  | 9  | 1  |
| 9  | 7  | 1 | 18 | 7  | 1  | 3  |
| 14 | 6  | 0 | 2  | 2  | 3  | 7  |
| 19 | 2  | 2 | 10 | 18 | 6  | 3  |
| 14 | 2  | 1 | 13 | 14 | 4  | 2  |
| 6  | 2  | 2 | 6  | 7  | 5  | 3  |
| 14 | 1  | 1 | 2  | 16 | 8  | 9  |
| 15 | 6  | 1 | 7  | 5  | 6  | 13 |
| 0  | 0  | 0 | 18 | 0  | 1  | 0  |
| 6  | 0  | 0 | 21 | 7  | 7  | 4  |
| 13 | 0  | 0 | 11 | 9  | 3  | 0  |
| 8  | 1  | 2 | 9  | 9  | 7  | 8  |
| 14 | 0  | 0 | 3  | 20 | 2  | 1  |
| 17 | 3  | 1 | 11 | 8  | 0  | 8  |
| 1  | 0  | 0 | 48 | 3  | 0  | 0  |
| 12 | 1  | 0 | 2  | 14 | 4  | 1  |
| 4  | 1  | 1 | 33 | 5  | 5  | 5  |
| 19 | 0  | 0 | 14 | 13 | 2  | 2  |
| 8  | 1  | 1 | 7  | 3  | 10 | 4  |
| 5  | 0  | 0 | 21 | 3  | 2  | 6  |
| 10 | 0  | 0 | 22 | 9  | 19 | 6  |
| 17 | 1  | 2 | 26 | 11 | 1  | 5  |
| 11 | 0  | 1 | 12 | 12 | 1  | 1  |
| 16 | 0  | 0 | 5  | 6  | 0  | 0  |
| 13 | 5  | 0 | 6  | 3  | 1  | 0  |
| 3  | 5  | 0 | 4  | 0  | 2  | 8  |
| 15 | 4  | 0 | 11 | 8  | 9  | 6  |
| 3  | 0  | 0 | 5  | 4  | 0  | 1  |
| 6  | 0  | 0 | 18 | 3  | 4  | 0  |
| 10 | 0  | 2 | 4  | 4  | 6  | 1  |
| 8  | 0  | 0 | 0  | 5  | 3  | 0  |
| 1  | 2  | 0 | 7  | 26 | 0  | 6  |
| 9  | 3  | 0 | 4  | 0  | 7  | 2  |
| 8  | 0  | 0 | 6  | 5  | 5  | 1  |

|    |   |   |    |    |    |    |
|----|---|---|----|----|----|----|
| 9  | 7 | 0 | 2  | 12 | 2  | 1  |
| 4  | 0 | 0 | 2  | 0  | 0  | 1  |
| 2  | 2 | 1 | 4  | 2  | 5  | 1  |
| 8  | 0 | 0 | 9  | 7  | 1  | 3  |
| 3  | 7 | 0 | 2  | 6  | 16 | 6  |
| 6  | 1 | 0 | 3  | 5  | 12 | 3  |
| 11 | 4 | 0 | 0  | 12 | 6  | 0  |
| 12 | 3 | 0 | 0  | 12 | 9  | 9  |
| 5  | 1 | 0 | 4  | 11 | 2  | 2  |
| 3  | 0 | 1 | 4  | 7  | 1  | 0  |
| 6  | 2 | 0 | 2  | 4  | 5  | 0  |
| 22 | 0 | 1 | 6  | 7  | 5  | 4  |
| 5  | 1 | 0 | 7  | 13 | 10 | 2  |
| 9  | 1 | 0 | 7  | 1  | 0  | 2  |
| 7  | 5 | 0 | 1  | 2  | 5  | 3  |
| 5  | 0 | 1 | 12 | 2  | 0  | 0  |
| 1  | 0 | 0 | 0  | 6  | 2  | 2  |
| 10 | 1 | 0 | 4  | 4  | 13 | 3  |
| 0  | 0 | 0 | 2  | 2  | 3  | 0  |
| 1  | 0 | 0 | 15 | 5  | 2  | 0  |
| 9  | 1 | 1 | 10 | 3  | 9  | 9  |
| 7  | 0 | 0 | 3  | 8  | 0  | 0  |
| 2  | 0 | 0 | 12 | 2  | 0  | 0  |
| 7  | 0 | 1 | 6  | 6  | 2  | 1  |
| 9  | 1 | 0 | 5  | 7  | 4  | 1  |
| 0  | 0 | 0 | 0  | 1  | 1  | 12 |
| 0  | 0 | 0 | 5  | 2  | 0  | 0  |
| 4  | 0 | 0 | 11 | 1  | 2  | 3  |
| 3  | 0 | 1 | 3  | 7  | 0  | 1  |
| 5  | 0 | 0 | 1  | 6  | 0  | 2  |
| 5  | 1 | 0 | 4  | 9  | 6  | 4  |
| 5  | 6 | 0 | 0  | 1  | 1  | 4  |
| 4  | 4 | 1 | 5  | 8  | 4  | 3  |
| 6  | 0 | 1 | 4  | 4  | 6  | 8  |
| 6  | 4 | 0 | 1  | 4  | 1  | 1  |
| 5  | 0 | 2 | 6  | 3  | 3  | 0  |
| 1  | 0 | 1 | 22 | 1  | 0  | 0  |
| 0  | 0 | 0 | 0  | 0  | 0  | 0  |
| 0  | 0 | 0 | 0  | 0  | 0  | 0  |
| 2  | 0 | 0 | 8  | 3  | 1  | 0  |
| 9  | 1 | 0 | 3  | 9  | 7  | 8  |
| 1  | 0 | 0 | 9  | 1  | 10 | 5  |
| 3  | 6 | 1 | 1  | 1  | 3  | 6  |
| 1  | 1 | 0 | 7  | 1  | 0  | 1  |
| 0  | 0 | 0 | 1  | 0  | 0  | 0  |
| 1  | 0 | 0 | 7  | 0  | 1  | 1  |
| 0  | 0 | 0 | 14 | 2  | 1  | 4  |
| 1  | 0 | 0 | 18 | 2  | 0  | 0  |
| 5  | 2 | 0 | 0  | 2  | 3  | 0  |
| 3  | 1 | 0 | 2  | 4  | 3  | 9  |
| 6  | 3 | 2 | 0  | 1  | 5  | 1  |
| 0  | 0 | 0 | 3  | 0  | 0  | 0  |
| 5  | 0 | 0 | 6  | 3  | 4  | 2  |
| 1  | 0 | 0 | 4  | 4  | 0  | 0  |
| 1  | 3 | 0 | 2  | 0  | 2  | 0  |
| 1  | 0 | 0 | 3  | 5  | 0  | 0  |
| 3  | 0 | 0 | 14 | 0  | 0  | 1  |
| 5  | 0 | 0 | 1  | 3  | 0  | 0  |
| 3  | 3 | 0 | 4  | 2  | 0  | 1  |

|    |    |   |    |    |    |   |
|----|----|---|----|----|----|---|
| 3  | 24 | 0 | 0  | 1  | 4  | 2 |
| 4  | 1  | 0 | 4  | 2  | 1  | 0 |
| 3  | 0  | 0 | 4  | 3  | 1  | 0 |
| 8  | 3  | 0 | 0  | 5  | 6  | 1 |
| 2  | 1  | 0 | 3  | 4  | 1  | 1 |
| 4  | 0  | 1 | 6  | 6  | 1  | 0 |
| 0  | 1  | 0 | 5  | 1  | 0  | 0 |
| 0  | 0  | 0 | 3  | 0  | 0  | 0 |
| 4  | 1  | 0 | 7  | 4  | 1  | 0 |
| 3  | 1  | 0 | 5  | 2  | 1  | 0 |
| 3  | 2  | 0 | 0  | 0  | 0  | 3 |
| 3  | 1  | 1 | 6  | 1  | 0  | 0 |
| 0  | 0  | 0 | 3  | 0  | 0  | 0 |
| 0  | 0  | 0 | 3  | 1  | 0  | 0 |
| 6  | 0  | 0 | 3  | 10 | 5  | 1 |
| 2  | 2  | 0 | 0  | 5  | 13 | 2 |
| 7  | 0  | 0 | 4  | 3  | 0  | 0 |
| 4  | 0  | 0 | 1  | 4  | 1  | 0 |
| 0  | 1  | 0 | 6  | 1  | 1  | 0 |
| 5  | 1  | 0 | 0  | 4  | 1  | 1 |
| 1  | 0  | 1 | 6  | 5  | 1  | 4 |
| 3  | 0  | 0 | 2  | 5  | 0  | 0 |
| 14 | 0  | 0 | 4  | 3  | 0  | 0 |
| 0  | 0  | 0 | 7  | 1  | 4  | 1 |
| 1  | 1  | 0 | 0  | 0  | 4  | 3 |
| 3  | 0  | 0 | 2  | 0  | 10 | 1 |
| 2  | 0  | 0 | 0  | 3  | 22 | 0 |
| 6  | 3  | 0 | 0  | 2  | 2  | 2 |
| 3  | 1  | 2 | 0  | 4  | 1  | 0 |
| 9  | 0  | 0 | 14 | 2  | 2  | 1 |
| 1  | 0  | 0 | 2  | 0  | 1  | 1 |
| 1  | 0  | 0 | 10 | 3  | 1  | 0 |
| 7  | 0  | 0 | 0  | 2  | 3  | 0 |
| 0  | 0  | 0 | 1  | 0  | 1  | 0 |
| 3  | 0  | 0 | 2  | 4  | 1  | 1 |
| 0  | 0  | 0 | 18 | 0  | 0  | 0 |
| 0  | 3  | 1 | 1  | 0  | 0  | 4 |
| 0  | 0  | 0 | 2  | 1  | 3  | 1 |
| 2  | 0  | 0 | 9  | 0  | 0  | 1 |
| 2  | 3  | 1 | 0  | 0  | 0  | 1 |
| 0  | 1  | 0 | 2  | 0  | 0  | 0 |
| 2  | 0  | 0 | 4  | 1  | 0  | 0 |
| 1  | 0  | 0 | 3  | 1  | 3  | 0 |
| 0  | 0  | 0 | 1  | 0  | 0  | 0 |
| 0  | 0  | 0 | 3  | 1  | 0  | 0 |
| 4  | 1  | 0 | 6  | 2  | 1  | 0 |
| 2  | 0  | 0 | 6  | 2  | 3  | 0 |
| 2  | 0  | 0 | 6  | 0  | 1  | 0 |
| 1  | 0  | 0 | 5  | 0  | 0  | 0 |
| 4  | 0  | 0 | 1  | 3  | 3  | 1 |
| 6  | 0  | 0 | 0  | 5  | 6  | 2 |
| 4  | 0  | 0 | 1  | 7  | 0  | 0 |
| 2  | 1  | 0 | 1  | 6  | 1  | 0 |
| 5  | 1  | 0 | 0  | 2  | 1  | 1 |
| 0  | 0  | 0 | 2  | 0  | 0  | 0 |
| 0  | 0  | 0 | 10 | 0  | 3  | 0 |
| 0  | 0  | 0 | 2  | 0  | 0  | 0 |
| 1  | 2  | 0 | 1  | 3  | 3  | 1 |
| 4  | 0  | 0 | 1  | 0  | 1  | 0 |

|    |   |   |    |   |    |   |
|----|---|---|----|---|----|---|
| 1  | 0 | 0 | 0  | 1 | 8  | 0 |
| 4  | 0 | 1 | 3  | 4 | 5  | 1 |
| 1  | 0 | 0 | 6  | 2 | 2  | 3 |
| 2  | 1 | 0 | 0  | 0 | 16 | 5 |
| 0  | 0 | 0 | 3  | 0 | 3  | 1 |
| 4  | 0 | 0 | 2  | 2 | 2  | 0 |
| 10 | 0 | 0 | 0  | 4 | 1  | 0 |
| 4  | 0 | 1 | 13 | 0 | 0  | 0 |
| 1  | 2 | 0 | 2  | 2 | 3  | 0 |
| 1  | 1 | 0 | 1  | 2 | 0  | 0 |
| 6  | 2 | 0 | 0  | 2 | 2  | 1 |
| 2  | 0 | 0 | 2  | 4 | 0  | 0 |
| 1  | 2 | 0 | 0  | 3 | 0  | 0 |
| 3  | 0 | 0 | 1  | 1 | 6  | 1 |
| 1  | 1 | 0 | 0  | 0 | 1  | 0 |
| 1  | 1 | 0 | 0  | 1 | 4  | 3 |
| 3  | 8 | 0 | 2  | 0 | 2  | 2 |
| 6  | 1 | 0 | 1  | 2 | 3  | 2 |
| 4  | 0 | 0 | 0  | 0 | 1  | 0 |
| 0  | 1 | 0 | 10 | 0 | 0  | 0 |
| 8  | 0 | 0 | 12 | 1 | 1  | 0 |
| 1  | 2 | 0 | 2  | 0 | 2  | 1 |
| 0  | 1 | 0 | 2  | 4 | 2  | 1 |
| 5  | 1 | 0 | 1  | 2 | 1  | 0 |
| 4  | 0 | 0 | 0  | 5 | 3  | 0 |
| 0  | 0 | 0 | 4  | 0 | 0  | 0 |
| 10 | 0 | 0 | 3  | 1 | 0  | 0 |
| 4  | 0 | 0 | 2  | 3 | 0  | 1 |
| 0  | 0 | 0 | 0  | 1 | 2  | 0 |
| 1  | 1 | 0 | 0  | 3 | 0  | 0 |
| 11 | 0 | 0 | 0  | 0 | 0  | 0 |
| 2  | 1 | 0 | 1  | 1 | 1  | 0 |
| 2  | 1 | 0 | 0  | 2 | 3  | 1 |
| 1  | 1 | 0 | 1  | 0 | 1  | 1 |
| 0  | 2 | 0 | 2  | 2 | 7  | 2 |
| 1  | 1 | 0 | 0  | 0 | 0  | 1 |
| 8  | 2 | 0 | 1  | 2 | 4  | 0 |
| 0  | 1 | 0 | 1  | 0 | 3  | 0 |

|      |      |      |      |      |      |      |
|------|------|------|------|------|------|------|
| 0.90 | 0.12 | 0.08 | 0.02 | 0.34 | 0.93 | 0.94 |
| 8    | 30   | 31   | 37   | 20   | 6    | 4    |
| 1    | 1    | 1    | 1    | 1    | 1    | 1    |

|         |        |        |         |         |        |        |
|---------|--------|--------|---------|---------|--------|--------|
| 36      | 37     | 38     | 39      | 40      | 41     | 42     |
| 9       | 10     | 11     | 12      | 13      | 14     | 15     |
| C_37    | C_38   | C_39   | C_43    | C_48    | D_10   | D_12   |
| CHR_NP  | CHR_NP | CHR_NP | CHR_NP  | CHR_NP  | CHR_NP | CHR_NP |
| 2915691 | 932164 | 148130 | 2018570 | 2072241 | 727386 | 206047 |
| CHR_NP  | CHR_NP | CHR_NP | CHR_NP  | CHR_NP  | CHR_NP | CHR_NP |
| 1119107 | 698786 | 56414  | 382904  | 593526  | 308682 | 28125  |
| 107450  | 11085  | 4692   | 49604   | 152869  | 23073  | 6563   |
| 527415  | 18116  | 13820  | 77016   | 385992  | 63225  | 24309  |
| 186072  | 37780  | 6531   | 62996   | 114740  | 11822  | 2047   |
| 221867  | 36882  | 11931  | 143942  | 254736  | 89228  | 33653  |

|       |       |      |        |        |       |       |
|-------|-------|------|--------|--------|-------|-------|
| 22930 | 3941  | 3244 | 97556  | 27400  | 2763  | 381   |
| 94903 | 4076  | 6644 | 91561  | 104908 | 22052 | 6808  |
| 5144  | 336   | 1560 | 352009 | 7545   | 2512  | 2325  |
| 20714 | 1927  | 1860 | 50045  | 22013  | 4185  | 2552  |
| 60783 | 6245  | 7346 | 116265 | 23827  | 6144  | 1172  |
| 32180 | 6565  | 5855 | 75495  | 12756  | 23750 | 19091 |
| 36680 | 7874  | 1869 | 28048  | 35505  | 8613  | 2253  |
| 49017 | 1645  | 2208 | 28494  | 21950  | 4686  | 1683  |
| 24453 | 24432 | 1247 | 16962  | 18735  | 15532 | 6102  |
| 8257  | 694   | 1172 | 28299  | 10207  | 613   | 202   |
| 39192 | 13559 | 450  | 5400   | 12774  | 8711  | 4731  |
| 9621  | 146   | 686  | 21808  | 9339   | 790   | 192   |
| 12394 | 826   | 1168 | 18331  | 12358  | 5454  | 2635  |
| 15407 | 717   | 918  | 26233  | 13684  | 609   | 126   |
| 24919 | 1038  | 1631 | 17880  | 15631  | 6584  | 1697  |
| 20190 | 1251  | 1020 | 15754  | 16830  | 6083  | 3941  |
| 9877  | 1143  | 841  | 20274  | 7357   | 1802  | 494   |
| 11176 | 292   | 1148 | 13470  | 4425   | 990   | 270   |
| 12983 | 77    | 333  | 16065  | 13111  | 467   | 230   |
| 6261  | 89    | 832  | 10359  | 8660   | 1201  | 676   |
| 15706 | 1088  | 781  | 6546   | 6792   | 2657  | 1291  |
| 9772  | 5049  | 303  | 3559   | 5710   | 8014  | 7864  |
| 849   | 240   | 517  | 11574  | 2119   | 1372  | 413   |
| 5551  | 587   | 227  | 4758   | 4318   | 1315  | 494   |
| 10136 | 844   | 393  | 5438   | 4042   | 7254  | 2374  |
| 9819  | 441   | 586  | 7562   | 9334   | 1073  | 264   |
| 10464 | 3285  | 188  | 2775   | 7112   | 1333  | 440   |
| 4123  | 191   | 168  | 8470   | 3775   | 1146  | 644   |
| 2212  | 114   | 567  | 22075  | 2250   | 973   | 258   |
| 5155  | 548   | 208  | 4446   | 4019   | 1204  | 459   |
| 6463  | 2315  | 359  | 6902   | 5146   | 2115  | 172   |
| 5083  | 425   | 812  | 14383  | 4433   | 1060  | 646   |
| 4974  | 193   | 455  | 9827   | 3480   | 769   | 665   |
| 8506  | 602   | 173  | 2542   | 4769   | 6449  | 1347  |
| 10639 | 14956 | 57   | 691    | 7744   | 9122  | 3042  |
| 10287 | 568   | 251  | 3486   | 6633   | 10386 | 2733  |
| 8284  | 774   | 317  | 3949   | 8448   | 3106  | 999   |
| 5680  | 1033  | 99   | 2057   | 2888   | 3292  | 742   |
| 672   | 66    | 204  | 5936   | 1156   | 220   | 90    |
| 6637  | 148   | 185  | 10804  | 7260   | 1532  | 1263  |
| 6740  | 861   | 199  | 2797   | 3352   | 978   | 839   |
| 3002  | 208   | 131  | 4229   | 2009   | 1205  | 1306  |
| 3092  | 1921  | 111  | 879    | 3270   | 1891  | 1190  |
| 227   | 80    | 7    | 485    | 135    | 32    | 32    |
| 2038  | 43    | 333  | 5425   | 1169   | 758   | 464   |
| 741   | 308   | 177  | 1261   | 918    | 1652  | 870   |
| 2395  | 53    | 267  | 5813   | 3210   | 754   | 231   |
| 1818  | 379   | 160  | 2939   | 1434   | 3074  | 2195  |
| 2899  | 117   | 243  | 2661   | 2549   | 85    | 37    |
| 2193  | 110   | 149  | 1297   | 1239   | 1707  | 698   |
| 205   | 19    | 58   | 2116   | 113    | 79    | 29    |
| 1974  | 277   | 83   | 3015   | 1573   | 657   | 362   |
| 2658  | 128   | 111  | 2724   | 2705   | 111   | 65    |
| 4160  | 175   | 194  | 3000   | 2566   | 219   | 72    |
| 1502  | 354   | 43   | 668    | 2358   | 658   | 360   |
| 3150  | 172   | 202  | 4586   | 1390   | 1142  | 1023  |
| 2575  | 92    | 164  | 3392   | 2349   | 809   | 669   |
| 261   | 28    | 30   | 2396   | 150    | 8     | 15    |
| 431   | 30    | 17   | 309    | 108    | 25    | 13    |



|      |      |     |      |      |      |      |
|------|------|-----|------|------|------|------|
| 724  | 3378 | 35  | 294  | 515  | 234  | 92   |
| 640  | 51   | 63  | 2082 | 552  | 174  | 42   |
| 537  | 33   | 237 | 4285 | 745  | 176  | 85   |
| 292  | 9    | 34  | 1456 | 232  | 116  | 21   |
| 1126 | 12   | 88  | 2265 | 899  | 1027 | 513  |
| 254  | 70   | 15  | 769  | 331  | 143  | 14   |
| 2383 | 633  | 135 | 1280 | 1080 | 831  | 161  |
| 1528 | 1881 | 58  | 498  | 412  | 791  | 212  |
| 207  | 26   | 68  | 2189 | 265  | 61   | 48   |
| 1318 | 121  | 95  | 2107 | 512  | 224  | 76   |
| 1376 | 19   | 32  | 1048 | 1116 | 95   | 20   |
| 361  | 228  | 126 | 911  | 618  | 491  | 265  |
| 878  | 127  | 41  | 517  | 747  | 835  | 328  |
| 414  | 86   | 23  | 635  | 416  | 400  | 388  |
| 1539 | 640  | 24  | 352  | 921  | 780  | 301  |
| 1370 | 103  | 194 | 2209 | 834  | 208  | 124  |
| 761  | 153  | 19  | 631  | 813  | 107  | 59   |
| 1591 | 252  | 41  | 620  | 834  | 855  | 493  |
| 1085 | 713  | 24  | 169  | 787  | 147  | 11   |
| 341  | 8    | 209 | 5325 | 197  | 33   | 4    |
| 464  | 19   | 16  | 1258 | 400  | 175  | 197  |
| 1293 | 65   | 60  | 1721 | 702  | 2554 | 2880 |
| 1114 | 522  | 30  | 329  | 564  | 1136 | 1039 |
| 205  | 12   | 15  | 1000 | 224  | 13   | 6    |
| 1331 | 49   | 34  | 507  | 516  | 65   | 45   |
| 746  | 163  | 17  | 181  | 448  | 304  | 145  |
| 1017 | 64   | 31  | 490  | 856  | 347  | 152  |
| 56   | 22   | 4   | 158  | 9    | 21   | 16   |
| 1035 | 56   | 15  | 195  | 633  | 291  | 130  |
| 286  | 14   | 23  | 500  | 181  | 24   | 15   |
| 104  | 14   | 14  | 1025 | 107  | 41   | 8    |
| 426  | 16   | 28  | 540  | 618  | 132  | 46   |
| 812  | 237  | 24  | 107  | 554  | 240  | 121  |
| 433  | 184  | 33  | 231  | 429  | 423  | 274  |
| 831  | 69   | 35  | 232  | 824  | 448  | 124  |
| 84   | 6    | 15  | 806  | 65   | 10   | 4    |
| 879  | 13   | 41  | 884  | 492  | 887  | 245  |
| 389  | 32   | 24  | 220  | 304  | 45   | 23   |
| 1220 | 189  | 20  | 273  | 688  | 510  | 399  |
| 374  | 9    | 24  | 810  | 465  | 28   | 20   |
| 171  | 24   | 41  | 414  | 200  | 31   | 9    |
| 101  | 5    | 13  | 1136 | 106  | 26   | 14   |
| 555  | 47   | 13  | 291  | 436  | 998  | 754  |
| 307  | 15   | 28  | 486  | 387  | 66   | 11   |
| 154  | 14   | 13  | 586  | 110  | 98   | 18   |
| 112  | 8    | 10  | 272  | 117  | 345  | 105  |
| 367  | 20   | 26  | 707  | 502  | 6    | 9    |
| 770  | 55   | 20  | 263  | 386  | 167  | 57   |
| 460  | 15   | 36  | 724  | 310  | 670  | 329  |
| 58   | 8    | 9   | 324  | 86   | 28   | 6    |
| 1363 | 16   | 40  | 503  | 524  | 70   | 109  |
| 1481 | 117  | 17  | 154  | 256  | 58   | 34   |
| 236  | 43   | 17  | 521  | 329  | 31   | 20   |
| 125  | 9    | 11  | 283  | 113  | 75   | 34   |
| 125  | 9    | 11  | 283  | 113  | 75   | 34   |
| 504  | 19   | 20  | 740  | 613  | 17   | 4    |
| 227  | 70   | 17  | 353  | 128  | 332  | 286  |
| 498  | 53   | 12  | 279  | 276  | 17   | 8    |
| 39   | 10   | 25  | 182  | 88   | 9    | 0    |

|     |     |    |     |     |     |     |
|-----|-----|----|-----|-----|-----|-----|
| 205 | 7   | 20 | 422 | 266 | 30  | 19  |
| 85  | 4   | 3  | 100 | 28  | 39  | 21  |
| 250 | 54  | 17 | 149 | 209 | 96  | 69  |
| 279 | 18  | 5  | 178 | 206 | 390 | 617 |
| 308 | 21  | 13 | 139 | 260 | 58  | 28  |
| 293 | 12  | 3  | 139 | 126 | 282 | 245 |
| 301 | 20  | 1  | 59  | 158 | 79  | 13  |
| 42  | 10  | 1  | 70  | 41  | 180 | 45  |
| 169 | 3   | 8  | 215 | 232 | 84  | 41  |
| 124 | 6   | 11 | 279 | 122 | 30  | 45  |
| 288 | 28  | 21 | 200 | 103 | 385 | 217 |
| 112 | 2   | 4  | 183 | 64  | 169 | 229 |
| 215 | 16  | 18 | 405 | 188 | 62  | 60  |
| 200 | 30  | 14 | 206 | 70  | 36  | 30  |
| 71  | 18  | 5  | 349 | 58  | 88  | 147 |
| 116 | 4   | 4  | 98  | 86  | 5   | 13  |
| 202 | 22  | 6  | 175 | 119 | 145 | 139 |
| 225 | 55  | 5  | 67  | 136 | 118 | 49  |
| 159 | 38  | 9  | 176 | 124 | 38  | 19  |
| 229 | 267 | 7  | 36  | 250 | 168 | 81  |
| 177 | 7   | 4  | 65  | 80  | 36  | 12  |
| 26  | 4   | 0  | 197 | 10  | 19  | 26  |
| 50  | 118 | 4  | 57  | 57  | 67  | 39  |
| 392 | 26  | 6  | 69  | 201 | 31  | 2   |
| 99  | 6   | 4  | 67  | 77  | 4   | 1   |
| 99  | 64  | 5  | 45  | 117 | 21  | 10  |
| 131 | 19  | 3  | 61  | 61  | 217 | 78  |
| 121 | 6   | 12 | 205 | 114 | 50  | 18  |
| 43  | 11  | 4  | 177 | 46  | 24  | 20  |
| 11  | 2   | 9  | 167 | 36  | 9   | 0   |
| 230 | 20  | 2  | 38  | 161 | 45  | 12  |
| 102 | 8   | 4  | 155 | 226 | 9   | 2   |
| 78  | 73  | 2  | 116 | 30  | 92  | 63  |
| 57  | 5   | 0  | 103 | 81  | 27  | 25  |
| 160 | 17  | 9  | 214 | 64  | 193 | 86  |
| 210 | 10  | 8  | 94  | 82  | 119 | 92  |
| 49  | 61  | 6  | 38  | 19  | 69  | 71  |
| 20  | 0   | 1  | 26  | 3   | 3   | 3   |
| 211 | 13  | 13 | 210 | 156 | 214 | 116 |
| 130 | 63  | 4  | 61  | 72  | 138 | 71  |
| 93  | 1   | 13 | 169 | 66  | 22  | 6   |
| 78  | 1   | 4  | 159 | 74  | 27  | 33  |
| 79  | 154 | 7  | 73  | 62  | 89  | 31  |
| 172 | 14  | 2  | 86  | 84  | 13  | 1   |
| 37  | 28  | 15 | 153 | 95  | 312 | 223 |
| 31  | 0   | 3  | 95  | 54  | 2   | 0   |
| 40  | 21  | 1  | 118 | 25  | 21  | 10  |
| 149 | 1   | 9  | 110 | 151 | 271 | 79  |
| 133 | 4   | 13 | 146 | 51  | 124 | 23  |
| 133 | 36  | 8  | 21  | 166 | 16  | 12  |
| 113 | 4   | 6  | 84  | 102 | 17  | 1   |
| 57  | 0   | 4  | 86  | 88  | 12  | 1   |
| 176 | 27  | 2  | 17  | 77  | 389 | 116 |
| 13  | 9   | 12 | 81  | 17  | 58  | 48  |
| 77  | 3   | 6  | 97  | 76  | 35  | 24  |
| 111 | 1   | 9  | 312 | 64  | 105 | 62  |
| 28  | 11  | 8  | 94  | 40  | 157 | 29  |
| 146 | 44  | 6  | 132 | 103 | 22  | 12  |
| 39  | 1   | 1  | 128 | 22  | 9   | 6   |

|     |    |    |     |     |     |     |
|-----|----|----|-----|-----|-----|-----|
| 5   | 12 | 11 | 49  | 18  | 93  | 40  |
| 49  | 2  | 4  | 124 | 52  | 4   | 1   |
| 61  | 43 | 5  | 50  | 28  | 41  | 20  |
| 126 | 89 | 3  | 30  | 82  | 115 | 118 |
| 39  | 1  | 0  | 112 | 22  | 9   | 5   |
| 33  | 3  | 16 | 95  | 29  | 35  | 7   |
| 93  | 11 | 5  | 112 | 70  | 31  | 69  |
| 109 | 5  | 0  | 98  | 76  | 14  | 7   |
| 0   | 3  | 0  | 0   | 2   | 36  | 51  |
| 11  | 3  | 5  | 589 | 24  | 1   | 0   |
| 83  | 0  | 5  | 87  | 77  | 24  | 18  |
| 83  | 52 | 3  | 5   | 83  | 13  | 2   |
| 83  | 20 | 5  | 65  | 31  | 20  | 13  |
| 287 | 4  | 3  | 51  | 49  | 34  | 28  |
| 6   | 0  | 4  | 52  | 16  | 6   | 0   |
| 29  | 26 | 2  | 49  | 29  | 22  | 9   |
| 64  | 1  | 7  | 151 | 33  | 115 | 95  |
| 64  | 2  | 5  | 41  | 61  | 52  | 46  |
| 96  | 20 | 0  | 3   | 101 | 22  | 11  |
| 172 | 2  | 5  | 53  | 57  | 3   | 2   |
| 108 | 12 | 0  | 17  | 46  | 102 | 66  |
| 57  | 5  | 6  | 63  | 32  | 38  | 18  |
| 19  | 4  | 2  | 174 | 19  | 27  | 5   |
| 17  | 3  | 2  | 7   | 20  | 51  | 50  |
| 44  | 42 | 1  | 21  | 58  | 49  | 34  |
| 100 | 12 | 3  | 46  | 69  | 14  | 2   |
| 56  | 6  | 6  | 60  | 29  | 11  | 21  |
| 41  | 66 | 5  | 31  | 19  | 35  | 24  |
| 149 | 8  | 2  | 29  | 75  | 45  | 30  |
| 79  | 1  | 1  | 33  | 95  | 23  | 4   |
| 3   | 1  | 4  | 60  | 14  | 1   | 0   |
| 59  | 54 | 2  | 24  | 54  | 68  | 41  |
| 13  | 3  | 6  | 42  | 19  | 37  | 21  |
| 75  | 8  | 0  | 14  | 80  | 44  | 37  |
| 65  | 7  | 3  | 31  | 61  | 14  | 8   |
| 70  | 3  | 3  | 21  | 61  | 16  | 13  |
| 4   | 0  | 0  | 18  | 1   | 1   | 1   |
| 78  | 8  | 3  | 36  | 45  | 6   | 0   |
| 2   | 0  | 2  | 64  | 8   | 2   | 0   |
| 32  | 11 | 2  | 64  | 35  | 39  | 34  |
| 75  | 0  | 3  | 129 | 40  | 13  | 21  |
| 43  | 10 | 4  | 123 | 29  | 56  | 26  |
| 11  | 2  | 3  | 14  | 25  | 4   | 2   |
| 86  | 24 | 1  | 19  | 48  | 44  | 25  |
| 60  | 22 | 1  | 5   | 26  | 33  | 29  |
| 18  | 25 | 0  | 6   | 16  | 14  | 15  |
| 75  | 10 | 0  | 21  | 36  | 35  | 16  |
| 36  | 4  | 2  | 88  | 25  | 9   | 2   |
| 22  | 0  | 9  | 124 | 19  | 6   | 6   |
| 31  | 15 | 0  | 9   | 15  | 20  | 10  |
| 10  | 0  | 0  | 60  | 9   | 1   | 0   |
| 59  | 11 | 5  | 33  | 21  | 59  | 34  |
| 33  | 3  | 2  | 13  | 18  | 5   | 6   |
| 25  | 9  | 0  | 32  | 12  | 39  | 56  |
| 40  | 2  | 3  | 39  | 43  | 108 | 118 |
| 47  | 2  | 4  | 148 | 14  | 0   | 2   |
| 24  | 0  | 1  | 37  | 34  | 14  | 6   |
| 32  | 7  | 3  | 12  | 31  | 7   | 5   |
| 9   | 1  | 9  | 18  | 6   | 21  | 8   |

|    |    |   |     |    |    |     |
|----|----|---|-----|----|----|-----|
| 57 | 0  | 2 | 120 | 23 | 31 | 26  |
| 12 | 1  | 2 | 65  | 13 | 2  | 1   |
| 16 | 0  | 2 | 52  | 15 | 3  | 0   |
| 16 | 0  | 2 | 52  | 15 | 3  | 0   |
| 11 | 8  | 2 | 14  | 21 | 25 | 7   |
| 49 | 7  | 0 | 10  | 32 | 35 | 19  |
| 19 | 1  | 0 | 22  | 14 | 22 | 10  |
| 6  | 0  | 2 | 12  | 14 | 9  | 4   |
| 42 | 1  | 0 | 13  | 30 | 1  | 0   |
| 35 | 2  | 1 | 26  | 44 | 16 | 15  |
| 33 | 2  | 6 | 64  | 11 | 68 | 22  |
| 20 | 13 | 2 | 14  | 13 | 5  | 1   |
| 48 | 4  | 1 | 8   | 28 | 46 | 160 |
| 24 | 1  | 2 | 16  | 52 | 5  | 2   |
| 27 | 1  | 0 | 3   | 70 | 13 | 0   |
| 94 | 12 | 5 | 39  | 24 | 0  | 3   |
| 26 | 3  | 2 | 59  | 21 | 9  | 2   |
| 1  | 2  | 0 | 15  | 0  | 1  | 4   |
| 22 | 3  | 0 | 41  | 15 | 20 | 8   |
| 24 | 1  | 0 | 30  | 17 | 3  | 0   |
| 50 | 8  | 0 | 8   | 32 | 32 | 13  |
| 14 | 47 | 0 | 10  | 11 | 12 | 12  |
| 22 | 1  | 0 | 28  | 17 | 3  | 0   |
| 15 | 4  | 0 | 32  | 22 | 23 | 6   |
| 20 | 4  | 0 | 7   | 12 | 11 | 7   |
| 18 | 1  | 1 | 34  | 11 | 7  | 4   |
| 23 | 25 | 0 | 23  | 10 | 19 | 13  |
| 1  | 1  | 0 | 13  | 2  | 4  | 1   |
| 71 | 8  | 0 | 3   | 34 | 43 | 78  |
| 22 | 27 | 0 | 10  | 25 | 18 | 9   |
| 8  | 20 | 0 | 19  | 10 | 15 | 21  |
| 12 | 4  | 2 | 13  | 9  | 4  | 2   |
| 17 | 0  | 2 | 23  | 14 | 2  | 1   |
| 1  | 0  | 0 | 10  | 1  | 1  | 1   |
| 33 | 1  | 2 | 8   | 21 | 10 | 1   |
| 22 | 0  | 2 | 56  | 29 | 2  | 1   |
| 32 | 64 | 3 | 43  | 17 | 0  | 23  |
| 21 | 15 | 0 | 9   | 12 | 24 | 31  |
| 51 | 3  | 1 | 31  | 18 | 0  | 2   |
| 26 | 8  | 1 | 12  | 23 | 34 | 9   |
| 12 | 1  | 0 | 13  | 7  | 38 | 17  |
| 30 | 1  | 0 | 18  | 17 | 4  | 0   |
| 7  | 4  | 5 | 7   | 12 | 11 | 8   |
| 33 | 5  | 2 | 15  | 24 | 20 | 12  |
| 26 | 4  | 1 | 11  | 5  | 10 | 11  |
| 31 | 7  | 0 | 5   | 18 | 14 | 3   |
| 21 | 0  | 1 | 47  | 27 | 1  | 1   |
| 8  | 3  | 3 | 30  | 15 | 2  | 1   |
| 2  | 0  | 1 | 23  | 1  | 3  | 0   |
| 9  | 0  | 2 | 10  | 5  | 0  | 0   |
| 91 | 0  | 1 | 13  | 21 | 0  | 1   |
| 14 | 5  | 3 | 1   | 12 | 30 | 7   |
| 19 | 0  | 4 | 71  | 7  | 14 | 4   |
| 22 | 4  | 1 | 15  | 41 | 8  | 6   |
| 6  | 3  | 0 | 5   | 2  | 15 | 5   |
| 7  | 1  | 0 | 32  | 11 | 0  | 1   |
| 9  | 16 | 0 | 4   | 10 | 8  | 4   |
| 27 | 1  | 1 | 18  | 14 | 36 | 21  |
| 24 | 2  | 3 | 12  | 14 | 39 | 27  |

|    |    |   |    |    |    |    |
|----|----|---|----|----|----|----|
| 7  | 0  | 3 | 13 | 7  | 0  | 2  |
| 6  | 10 | 0 | 6  | 8  | 10 | 6  |
| 35 | 3  | 0 | 4  | 14 | 7  | 2  |
| 28 | 3  | 0 | 6  | 18 | 27 | 9  |
| 10 | 40 | 0 | 8  | 2  | 2  | 15 |
| 20 | 2  | 0 | 17 | 12 | 2  | 0  |
| 36 | 7  | 0 | 8  | 20 | 9  | 5  |
| 36 | 1  | 0 | 16 | 23 | 19 | 10 |
| 26 | 9  | 2 | 22 | 6  | 27 | 37 |
| 28 | 0  | 0 | 16 | 16 | 19 | 32 |
| 20 | 2  | 0 | 15 | 22 | 2  | 4  |
| 6  | 7  | 1 | 10 | 10 | 1  | 0  |
| 2  | 2  | 0 | 14 | 10 | 0  | 1  |
| 0  | 0  | 0 | 16 | 5  | 0  | 0  |
| 3  | 1  | 2 | 25 | 4  | 1  | 1  |
| 13 | 1  | 0 | 11 | 11 | 0  | 0  |
| 9  | 9  | 2 | 19 | 7  | 21 | 10 |
| 22 | 0  | 1 | 17 | 10 | 3  | 1  |
| 13 | 0  | 0 | 7  | 2  | 13 | 27 |
| 9  | 3  | 0 | 5  | 13 | 9  | 1  |
| 34 | 1  | 0 | 4  | 18 | 6  | 3  |
| 10 | 0  | 1 | 18 | 8  | 5  | 4  |
| 19 | 1  | 0 | 6  | 20 | 3  | 8  |
| 2  | 1  | 2 | 1  | 5  | 8  | 2  |
| 14 | 4  | 0 | 3  | 11 | 4  | 5  |
| 4  | 1  | 0 | 16 | 8  | 0  | 3  |
| 7  | 8  | 4 | 42 | 16 | 0  | 5  |
| 12 | 10 | 1 | 17 | 7  | 9  | 7  |
| 1  | 0  | 3 | 13 | 1  | 5  | 2  |
| 9  | 8  | 1 | 16 | 8  | 26 | 11 |
| 33 | 3  | 2 | 5  | 18 | 5  | 1  |
| 5  | 5  | 2 | 1  | 8  | 12 | 12 |
| 3  | 0  | 0 | 27 | 0  | 0  | 2  |
| 15 | 8  | 0 | 9  | 12 | 29 | 5  |
| 3  | 0  | 0 | 13 | 3  | 1  | 0  |
| 12 | 3  | 0 | 3  | 10 | 6  | 5  |
| 20 | 3  | 1 | 15 | 23 | 8  | 1  |
| 18 | 3  | 0 | 2  | 11 | 5  | 5  |
| 1  | 0  | 0 | 4  | 1  | 0  | 0  |
| 9  | 3  | 0 | 6  | 0  | 9  | 1  |
| 9  | 7  | 1 | 18 | 7  | 1  | 3  |
| 14 | 6  | 0 | 2  | 2  | 3  | 7  |
| 19 | 2  | 2 | 10 | 18 | 6  | 3  |
| 14 | 2  | 1 | 13 | 14 | 4  | 2  |
| 6  | 2  | 2 | 6  | 7  | 5  | 3  |
| 14 | 1  | 1 | 2  | 16 | 8  | 9  |
| 15 | 6  | 1 | 7  | 5  | 6  | 13 |
| 0  | 0  | 0 | 18 | 0  | 1  | 0  |
| 6  | 0  | 0 | 21 | 7  | 7  | 4  |
| 13 | 0  | 0 | 11 | 9  | 3  | 0  |
| 8  | 1  | 2 | 9  | 9  | 7  | 8  |
| 14 | 0  | 0 | 3  | 20 | 2  | 1  |
| 17 | 3  | 1 | 11 | 8  | 0  | 8  |
| 1  | 0  | 0 | 48 | 3  | 0  | 0  |
| 12 | 1  | 0 | 2  | 14 | 4  | 1  |
| 4  | 1  | 1 | 33 | 5  | 5  | 5  |
| 19 | 0  | 0 | 14 | 13 | 2  | 2  |
| 8  | 1  | 1 | 7  | 3  | 10 | 4  |
| 5  | 0  | 0 | 21 | 3  | 2  | 6  |

|    |   |   |    |    |    |    |
|----|---|---|----|----|----|----|
| 10 | 0 | 0 | 22 | 9  | 19 | 6  |
| 17 | 1 | 2 | 26 | 11 | 1  | 5  |
| 11 | 0 | 1 | 12 | 12 | 1  | 1  |
| 16 | 0 | 0 | 5  | 6  | 0  | 0  |
| 13 | 5 | 0 | 6  | 3  | 1  | 0  |
| 3  | 5 | 0 | 4  | 0  | 2  | 8  |
| 15 | 4 | 0 | 11 | 8  | 9  | 6  |
| 3  | 0 | 0 | 5  | 4  | 0  | 1  |
| 6  | 0 | 0 | 18 | 3  | 4  | 0  |
| 10 | 0 | 2 | 4  | 4  | 6  | 1  |
| 8  | 0 | 0 | 0  | 5  | 3  | 0  |
| 1  | 2 | 0 | 7  | 26 | 0  | 6  |
| 9  | 3 | 0 | 4  | 0  | 7  | 2  |
| 8  | 0 | 0 | 6  | 5  | 5  | 1  |
| 9  | 7 | 0 | 2  | 12 | 2  | 1  |
| 4  | 0 | 0 | 2  | 0  | 0  | 1  |
| 2  | 2 | 1 | 4  | 2  | 5  | 1  |
| 8  | 0 | 0 | 9  | 7  | 1  | 3  |
| 3  | 7 | 0 | 2  | 6  | 16 | 6  |
| 6  | 1 | 0 | 3  | 5  | 12 | 3  |
| 11 | 4 | 0 | 0  | 12 | 6  | 0  |
| 12 | 3 | 0 | 0  | 12 | 9  | 9  |
| 5  | 1 | 0 | 4  | 11 | 2  | 2  |
| 3  | 0 | 1 | 4  | 7  | 1  | 0  |
| 6  | 2 | 0 | 2  | 4  | 5  | 0  |
| 22 | 0 | 1 | 6  | 7  | 5  | 4  |
| 5  | 1 | 0 | 7  | 13 | 10 | 2  |
| 9  | 1 | 0 | 7  | 1  | 0  | 2  |
| 7  | 5 | 0 | 1  | 2  | 5  | 3  |
| 5  | 0 | 1 | 12 | 2  | 0  | 0  |
| 1  | 0 | 0 | 0  | 6  | 2  | 2  |
| 10 | 1 | 0 | 4  | 4  | 13 | 3  |
| 0  | 0 | 0 | 2  | 2  | 3  | 0  |
| 1  | 0 | 0 | 15 | 5  | 2  | 0  |
| 9  | 1 | 1 | 10 | 3  | 9  | 9  |
| 7  | 0 | 0 | 3  | 8  | 0  | 0  |
| 2  | 0 | 0 | 12 | 2  | 0  | 0  |
| 7  | 0 | 1 | 6  | 6  | 2  | 1  |
| 9  | 1 | 0 | 5  | 7  | 4  | 1  |
| 0  | 0 | 0 | 0  | 1  | 1  | 12 |
| 0  | 0 | 0 | 5  | 2  | 0  | 0  |
| 4  | 0 | 0 | 11 | 1  | 2  | 3  |
| 3  | 0 | 1 | 3  | 7  | 0  | 1  |
| 5  | 0 | 0 | 1  | 6  | 0  | 2  |
| 5  | 1 | 0 | 4  | 9  | 6  | 4  |
| 5  | 6 | 0 | 0  | 1  | 1  | 4  |
| 4  | 4 | 1 | 5  | 8  | 4  | 3  |
| 6  | 0 | 1 | 4  | 4  | 6  | 8  |
| 6  | 4 | 0 | 1  | 4  | 1  | 1  |
| 5  | 0 | 2 | 6  | 3  | 3  | 0  |
| 1  | 0 | 1 | 22 | 1  | 0  | 0  |
| 0  | 0 | 0 | 0  | 0  | 0  | 0  |
| 0  | 0 | 0 | 0  | 0  | 0  | 0  |
| 2  | 0 | 0 | 8  | 3  | 1  | 0  |
| 9  | 1 | 0 | 3  | 9  | 7  | 8  |
| 1  | 0 | 0 | 9  | 1  | 10 | 5  |
| 3  | 6 | 1 | 1  | 1  | 3  | 6  |
| 1  | 1 | 0 | 7  | 1  | 0  | 1  |
| 0  | 0 | 0 | 1  | 0  | 0  | 0  |

|    |    |   |    |    |    |   |
|----|----|---|----|----|----|---|
| 1  | 0  | 0 | 7  | 0  | 1  | 1 |
| 0  | 0  | 0 | 14 | 2  | 1  | 4 |
| 1  | 0  | 0 | 18 | 2  | 0  | 0 |
| 5  | 2  | 0 | 0  | 2  | 3  | 0 |
| 3  | 1  | 0 | 2  | 4  | 3  | 9 |
| 6  | 3  | 2 | 0  | 1  | 5  | 1 |
| 0  | 0  | 0 | 3  | 0  | 0  | 0 |
| 5  | 0  | 0 | 6  | 3  | 4  | 2 |
| 1  | 0  | 0 | 4  | 4  | 0  | 0 |
| 1  | 3  | 0 | 2  | 0  | 2  | 0 |
| 1  | 0  | 0 | 3  | 5  | 0  | 0 |
| 3  | 0  | 0 | 14 | 0  | 0  | 1 |
| 5  | 0  | 0 | 1  | 3  | 0  | 0 |
| 3  | 3  | 0 | 4  | 2  | 0  | 1 |
| 3  | 24 | 0 | 0  | 1  | 4  | 2 |
| 4  | 1  | 0 | 4  | 2  | 1  | 0 |
| 3  | 0  | 0 | 4  | 3  | 1  | 0 |
| 8  | 3  | 0 | 0  | 5  | 6  | 1 |
| 2  | 1  | 0 | 3  | 4  | 1  | 1 |
| 4  | 0  | 1 | 6  | 6  | 1  | 0 |
| 0  | 1  | 0 | 5  | 1  | 0  | 0 |
| 0  | 0  | 0 | 3  | 0  | 0  | 0 |
| 4  | 1  | 0 | 7  | 4  | 1  | 0 |
| 3  | 1  | 0 | 5  | 2  | 1  | 0 |
| 3  | 2  | 0 | 0  | 0  | 0  | 3 |
| 3  | 1  | 1 | 6  | 1  | 0  | 0 |
| 0  | 0  | 0 | 3  | 0  | 0  | 0 |
| 0  | 0  | 0 | 3  | 1  | 0  | 0 |
| 6  | 0  | 0 | 3  | 10 | 5  | 1 |
| 2  | 2  | 0 | 0  | 5  | 13 | 2 |
| 7  | 0  | 0 | 4  | 3  | 0  | 0 |
| 4  | 0  | 0 | 1  | 4  | 1  | 0 |
| 0  | 1  | 0 | 6  | 1  | 1  | 0 |
| 5  | 1  | 0 | 0  | 4  | 1  | 1 |
| 1  | 0  | 1 | 6  | 5  | 1  | 4 |
| 3  | 0  | 0 | 2  | 5  | 0  | 0 |
| 14 | 0  | 0 | 4  | 3  | 0  | 0 |
| 0  | 0  | 0 | 7  | 1  | 4  | 1 |
| 1  | 1  | 0 | 0  | 0  | 4  | 3 |
| 3  | 0  | 0 | 2  | 0  | 10 | 1 |
| 2  | 0  | 0 | 0  | 3  | 22 | 0 |
| 6  | 3  | 0 | 0  | 2  | 2  | 2 |
| 3  | 1  | 2 | 0  | 4  | 1  | 0 |
| 9  | 0  | 0 | 14 | 2  | 2  | 1 |
| 1  | 0  | 0 | 2  | 0  | 1  | 1 |
| 1  | 0  | 0 | 10 | 3  | 1  | 0 |
| 7  | 0  | 0 | 0  | 2  | 3  | 0 |
| 0  | 0  | 0 | 1  | 0  | 1  | 0 |
| 3  | 0  | 0 | 2  | 4  | 1  | 1 |
| 0  | 0  | 0 | 18 | 0  | 0  | 0 |
| 0  | 3  | 1 | 1  | 0  | 0  | 4 |
| 0  | 0  | 0 | 2  | 1  | 3  | 1 |
| 2  | 0  | 0 | 9  | 0  | 0  | 1 |
| 2  | 3  | 1 | 0  | 0  | 0  | 1 |
| 0  | 1  | 0 | 2  | 0  | 0  | 0 |
| 2  | 0  | 0 | 4  | 1  | 0  | 0 |
| 1  | 0  | 0 | 3  | 1  | 3  | 0 |
| 0  | 0  | 0 | 1  | 0  | 0  | 0 |
| 0  | 0  | 0 | 3  | 1  | 0  | 0 |





|         |        |        |         |         |        |        |
|---------|--------|--------|---------|---------|--------|--------|
| 36      | 37     | 38     | 39      | 40      | 41     | 42     |
| 9       | 10     | 11     | 12      | 13      | 14     | 15     |
| CHR_NP  | CHR_NP | CHR_NP | CHR_NP  | CHR_NP  | CHR_NP | CHR_NP |
| C_37    | C_38   | C_39   | C_43    | C_48    | D_10   | D_12   |
| 2915691 | 932164 | 148130 | 2018570 | 2072241 | 727386 | 206047 |
| CHR_NP  | CHR_NP | CHR_NP | CHR_NP  | CHR_NP  | CHR_NP | CHR_NP |
| 12.34   | 23.63  | 12.30  | 6.39    | 9.26    | 14.47  | 5.12   |
| 1.18    | 0.37   | 1.02   | 0.83    | 2.38    | 1.08   | 1.20   |
| 5.81    | 0.61   | 3.01   | 1.28    | 6.02    | 2.96   | 4.43   |
| 2.05    | 1.28   | 1.42   | 1.05    | 1.79    | 0.55   | 0.37   |
| 2.45    | 1.25   | 2.60   | 2.40    | 3.97    | 4.18   | 6.13   |
| 0.25    | 0.13   | 0.71   | 1.63    | 0.43    | 0.13   | 0.07   |
| 1.05    | 0.14   | 1.45   | 1.53    | 1.64    | 1.03   | 1.24   |
| 0.06    | 0.01   | 0.34   | 5.87    | 0.12    | 0.12   | 0.42   |
| 0.23    | 0.07   | 0.41   | 0.83    | 0.34    | 0.20   | 0.46   |
| 0.67    | 0.21   | 1.60   | 1.94    | 0.37    | 0.29   | 0.21   |
| 0.35    | 0.22   | 1.28   | 1.26    | 0.20    | 1.11   | 3.48   |
| 0.40    | 0.27   | 0.41   | 0.47    | 0.55    | 0.40   | 0.41   |
| 0.54    | 0.06   | 0.48   | 0.48    | 0.34    | 0.22   | 0.31   |
| 0.27    | 0.83   | 0.27   | 0.28    | 0.29    | 0.73   | 1.11   |
| 0.09    | 0.02   | 0.26   | 0.47    | 0.16    | 0.03   | 0.04   |
| 0.43    | 0.46   | 0.10   | 0.09    | 0.20    | 0.41   | 0.86   |
| 0.11    | 0.00   | 0.15   | 0.36    | 0.15    | 0.04   | 0.03   |
| 0.14    | 0.03   | 0.25   | 0.31    | 0.19    | 0.26   | 0.48   |
| 0.17    | 0.02   | 0.20   | 0.44    | 0.21    | 0.03   | 0.02   |
| 0.27    | 0.04   | 0.36   | 0.30    | 0.24    | 0.31   | 0.31   |
| 0.22    | 0.04   | 0.22   | 0.26    | 0.26    | 0.29   | 0.72   |
| 0.11    | 0.04   | 0.18   | 0.34    | 0.11    | 0.08   | 0.09   |
| 0.12    | 0.01   | 0.25   | 0.22    | 0.07    | 0.05   | 0.05   |
| 0.14    | 0.00   | 0.07   | 0.27    | 0.20    | 0.02   | 0.04   |
| 0.07    | 0.00   | 0.18   | 0.17    | 0.14    | 0.06   | 0.12   |
| 0.17    | 0.04   | 0.17   | 0.11    | 0.11    | 0.12   | 0.24   |
| 0.11    | 0.17   | 0.07   | 0.06    | 0.09    | 0.38   | 1.43   |
| 0.01    | 0.01   | 0.11   | 0.19    | 0.03    | 0.06   | 0.08   |
| 0.06    | 0.02   | 0.05   | 0.08    | 0.07    | 0.06   | 0.09   |
| 0.11    | 0.03   | 0.09   | 0.09    | 0.06    | 0.34   | 0.43   |
| 0.11    | 0.01   | 0.13   | 0.13    | 0.15    | 0.05   | 0.05   |
| 0.12    | 0.11   | 0.04   | 0.05    | 0.11    | 0.06   | 0.08   |
| 0.05    | 0.01   | 0.04   | 0.14    | 0.06    | 0.05   | 0.12   |
| 0.02    | 0.00   | 0.12   | 0.37    | 0.04    | 0.05   | 0.05   |
| 0.06    | 0.02   | 0.05   | 0.07    | 0.06    | 0.06   | 0.08   |
| 0.07    | 0.08   | 0.08   | 0.12    | 0.08    | 0.10   | 0.03   |
| 0.06    | 0.01   | 0.18   | 0.24    | 0.07    | 0.05   | 0.12   |
| 0.05    | 0.01   | 0.10   | 0.16    | 0.05    | 0.04   | 0.12   |
| 0.09    | 0.02   | 0.04   | 0.04    | 0.07    | 0.30   | 0.25   |
| 0.12    | 0.51   | 0.01   | 0.01    | 0.12    | 0.43   | 0.55   |
| 0.11    | 0.02   | 0.05   | 0.06    | 0.10    | 0.49   | 0.50   |
| 0.09    | 0.03   | 0.07   | 0.07    | 0.13    | 0.15   | 0.18   |
| 0.06    | 0.03   | 0.02   | 0.03    | 0.05    | 0.15   | 0.14   |
| 0.01    | 0.00   | 0.04   | 0.10    | 0.02    | 0.01   | 0.02   |
| 0.07    | 0.01   | 0.04   | 0.18    | 0.11    | 0.07   | 0.23   |
| 0.07    | 0.03   | 0.04   | 0.05    | 0.05    | 0.05   | 0.15   |
| 0.03    | 0.01   | 0.03   | 0.07    | 0.03    | 0.06   | 0.24   |
| 0.03    | 0.06   | 0.02   | 0.01    | 0.05    | 0.09   | 0.22   |
| 0.00    | 0.00   | 0.00   | 0.01    | 0.00    | 0.00   | 0.01   |
| 0.02    | 0.00   | 0.07   | 0.09    | 0.02    | 0.04   | 0.08   |
| 0.01    | 0.01   | 0.04   | 0.02    | 0.01    | 0.08   | 0.16   |
| 0.03    | 0.00   | 0.06   | 0.10    | 0.05    | 0.04   | 0.04   |

|      |      |      |      |      |      |      |
|------|------|------|------|------|------|------|
| 0.02 | 0.01 | 0.03 | 0.05 | 0.02 | 0.14 | 0.40 |
| 0.03 | 0.00 | 0.05 | 0.04 | 0.04 | 0.00 | 0.01 |
| 0.02 | 0.00 | 0.03 | 0.02 | 0.02 | 0.08 | 0.13 |
| 0.00 | 0.00 | 0.01 | 0.04 | 0.00 | 0.00 | 0.01 |
| 0.02 | 0.01 | 0.02 | 0.05 | 0.02 | 0.03 | 0.07 |
| 0.03 | 0.00 | 0.02 | 0.05 | 0.04 | 0.01 | 0.01 |
| 0.05 | 0.01 | 0.04 | 0.05 | 0.04 | 0.01 | 0.01 |
| 0.02 | 0.01 | 0.01 | 0.01 | 0.04 | 0.03 | 0.07 |
| 0.03 | 0.01 | 0.04 | 0.08 | 0.02 | 0.05 | 0.19 |
| 0.03 | 0.00 | 0.04 | 0.06 | 0.04 | 0.04 | 0.12 |
| 0.00 | 0.00 | 0.01 | 0.04 | 0.00 | 0.00 | 0.00 |
| 0.00 | 0.00 | 0.00 | 0.01 | 0.00 | 0.00 | 0.00 |
| 0.01 | 0.11 | 0.01 | 0.00 | 0.01 | 0.01 | 0.02 |
| 0.01 | 0.00 | 0.01 | 0.03 | 0.01 | 0.01 | 0.01 |
| 0.01 | 0.00 | 0.05 | 0.07 | 0.01 | 0.01 | 0.02 |
| 0.00 | 0.00 | 0.01 | 0.02 | 0.00 | 0.01 | 0.00 |
| 0.01 | 0.00 | 0.02 | 0.04 | 0.01 | 0.05 | 0.09 |
| 0.00 | 0.00 | 0.00 | 0.01 | 0.01 | 0.01 | 0.00 |
| 0.03 | 0.02 | 0.03 | 0.02 | 0.02 | 0.04 | 0.03 |
| 0.02 | 0.06 | 0.01 | 0.01 | 0.01 | 0.04 | 0.04 |
| 0.00 | 0.00 | 0.01 | 0.04 | 0.00 | 0.00 | 0.01 |
| 0.01 | 0.00 | 0.02 | 0.04 | 0.01 | 0.01 | 0.01 |
| 0.02 | 0.00 | 0.01 | 0.02 | 0.02 | 0.00 | 0.00 |
| 0.00 | 0.01 | 0.03 | 0.02 | 0.01 | 0.02 | 0.05 |
| 0.01 | 0.00 | 0.01 | 0.01 | 0.01 | 0.04 | 0.06 |
| 0.00 | 0.00 | 0.01 | 0.01 | 0.01 | 0.02 | 0.07 |
| 0.02 | 0.02 | 0.01 | 0.01 | 0.01 | 0.04 | 0.05 |
| 0.02 | 0.00 | 0.04 | 0.04 | 0.01 | 0.01 | 0.02 |
| 0.01 | 0.01 | 0.00 | 0.01 | 0.01 | 0.01 | 0.01 |
| 0.02 | 0.01 | 0.01 | 0.01 | 0.01 | 0.04 | 0.09 |
| 0.01 | 0.02 | 0.01 | 0.00 | 0.01 | 0.01 | 0.00 |
| 0.00 | 0.00 | 0.05 | 0.09 | 0.00 | 0.00 | 0.00 |
| 0.01 | 0.00 | 0.00 | 0.02 | 0.01 | 0.01 | 0.04 |
| 0.01 | 0.00 | 0.01 | 0.03 | 0.01 | 0.12 | 0.52 |
| 0.01 | 0.02 | 0.01 | 0.01 | 0.01 | 0.05 | 0.19 |
| 0.00 | 0.00 | 0.00 | 0.02 | 0.00 | 0.00 | 0.00 |
| 0.01 | 0.00 | 0.01 | 0.01 | 0.01 | 0.00 | 0.01 |
| 0.01 | 0.01 | 0.00 | 0.00 | 0.01 | 0.01 | 0.03 |
| 0.01 | 0.00 | 0.01 | 0.01 | 0.01 | 0.02 | 0.03 |
| 0.00 | 0.00 | 0.00 | 0.00 | 0.00 | 0.00 | 0.00 |
| 0.01 | 0.00 | 0.00 | 0.00 | 0.01 | 0.01 | 0.02 |
| 0.00 | 0.00 | 0.01 | 0.01 | 0.00 | 0.00 | 0.00 |
| 0.00 | 0.00 | 0.00 | 0.02 | 0.00 | 0.00 | 0.00 |
| 0.01 | 0.01 | 0.01 | 0.00 | 0.01 | 0.01 | 0.02 |
| 0.00 | 0.01 | 0.01 | 0.00 | 0.01 | 0.02 | 0.05 |
| 0.01 | 0.00 | 0.01 | 0.00 | 0.01 | 0.02 | 0.02 |
| 0.00 | 0.00 | 0.00 | 0.01 | 0.00 | 0.00 | 0.00 |
| 0.01 | 0.00 | 0.01 | 0.01 | 0.01 | 0.04 | 0.04 |
| 0.00 | 0.00 | 0.01 | 0.00 | 0.00 | 0.00 | 0.00 |
| 0.01 | 0.01 | 0.00 | 0.00 | 0.01 | 0.02 | 0.07 |
| 0.00 | 0.00 | 0.01 | 0.01 | 0.01 | 0.00 | 0.00 |
| 0.00 | 0.00 | 0.01 | 0.01 | 0.00 | 0.00 | 0.00 |
| 0.00 | 0.00 | 0.00 | 0.02 | 0.00 | 0.00 | 0.00 |
| 0.01 | 0.00 | 0.00 | 0.00 | 0.01 | 0.05 | 0.14 |
| 0.00 | 0.00 | 0.01 | 0.01 | 0.01 | 0.00 | 0.00 |
| 0.00 | 0.00 | 0.00 | 0.01 | 0.00 | 0.00 | 0.00 |
| 0.00 | 0.00 | 0.00 | 0.00 | 0.00 | 0.02 | 0.02 |
| 0.00 | 0.00 | 0.01 | 0.01 | 0.01 | 0.00 | 0.00 |







|       |       |       |       |       |       |       |
|-------|-------|-------|-------|-------|-------|-------|
| -0.72 | -1.04 | -0.37 | 0.49  | -0.49 | -0.78 | -0.25 |
| -0.23 | -1.41 | 2.16  | 3.03  | -1.00 | -1.21 | -1.40 |
| -0.44 | -0.94 | 3.02  | 2.96  | -1.02 | 2.41  | 11.30 |
| -0.78 | -2.02 | -0.75 | -0.21 | 0.55  | -0.79 | -0.73 |
| 1.05  | -1.74 | 0.71  | 0.68  | -0.09 | -0.79 | -0.29 |
| -1.14 | 2.07  | -1.12 | -1.06 | -1.01 | 1.50  | 3.71  |
| -0.59 | -0.90 | 0.17  | 1.16  | -0.28 | -0.88 | -0.84 |
| 0.59  | 0.71  | -0.86 | -0.90 | -0.42 | 0.49  | 2.47  |
| -0.32 | -0.96 | -0.05 | 1.30  | -0.08 | -0.76 | -0.77 |
| -0.77 | -1.84 | 0.40  | 0.90  | -0.21 | 0.41  | 2.61  |
| -0.10 | -1.40 | 0.17  | 2.29  | 0.28  | -1.37 | -1.42 |
| 0.44  | -1.95 | 1.25  | 0.68  | 0.13  | 0.78  | 0.78  |
| 1.05  | -1.85 | 1.05  | 1.70  | 1.69  | 2.06  | 9.02  |
| -0.65 | -1.72 | 0.49  | 2.86  | -0.56 | -1.02 | -0.94 |
| 0.05  | -1.35 | 1.63  | 1.31  | -0.62 | -0.90 | -0.86 |
| 0.23  | -1.10 | -0.44 | 1.40  | 0.80  | -0.92 | -0.73 |
| -0.36 | -0.75 | 0.30  | 0.25  | 0.03  | -0.44 | -0.04 |
| 1.10  | -1.47 | 1.04  | -0.11 | -0.17 | 0.18  | 2.26  |
| -0.49 | 0.52  | -1.15 | -1.26 | -0.78 | 3.78  | 20.61 |
| -0.99 | -1.00 | 0.00  | 0.77  | -0.76 | -0.46 | -0.36 |
| -0.90 | -1.70 | -1.12 | -0.54 | -0.78 | -0.89 | -0.34 |
| 0.23  | -1.72 | -0.38 | -0.27 | -0.91 | 5.56  | 7.72  |
| 0.41  | -1.76 | 0.87  | 0.83  | 1.28  | -0.94 | -0.99 |
| -0.13 | -0.21 | -1.57 | -1.47 | -0.21 | -1.15 | -0.81 |
| -0.21 | -0.80 | -0.35 | 1.23  | -0.01 | -0.09 | 0.87  |
| -0.27 | -0.38 | 0.28  | 1.61  | -0.21 | -0.15 | -0.14 |
| -0.84 | -1.70 | -1.10 | -0.46 | -0.71 | -0.85 | -0.24 |
| -0.44 | -0.40 | -0.40 | -0.17 | -0.38 | -0.27 | -0.68 |
| -0.68 | -1.17 | 0.75  | 1.50  | -0.52 | -0.75 | 0.05  |
| -0.39 | -0.88 | 0.07  | 0.73  | -0.39 | -0.58 | 0.29  |
| -0.07 | -0.95 | -0.74 | -0.68 | -0.30 | 2.43  | 1.75  |
| 0.14  | 3.28  | -0.70 | -0.71 | 0.17  | 2.65  | 3.67  |
| 0.77  | -1.16 | -0.43 | -0.36 | 0.56  | 8.40  | 8.63  |
| 0.68  | -1.28 | 0.01  | -0.08 | 1.90  | 2.31  | 3.41  |
| -0.07 | -1.19 | -1.73 | -1.21 | -0.78 | 3.64  | 2.87  |
| -0.75 | -0.87 | 0.17  | 1.53  | -0.48 | -0.67 | -0.52 |
| 0.23  | -1.22 | -0.47 | 2.50  | 1.08  | 0.20  | 3.57  |
| 2.02  | -1.26 | -0.22 | 0.02  | 0.42  | -0.04 | 7.71  |
| -0.31 | -1.36 | -0.49 | 1.20  | -0.38 | 0.63  | 7.95  |
| -0.52 | 0.51  | -0.84 | -1.16 | 0.05  | 1.30  | 5.55  |
| -0.31 | -0.31 | -0.35 | -0.12 | -0.33 | -0.35 | -0.20 |
| -0.18 | -0.66 | 0.97  | 1.38  | -0.27 | 0.12  | 1.24  |
| -1.47 | -1.35 | 0.17  | -0.77 | -1.14 | 2.27  | 6.64  |
| -0.23 | -0.95 | 0.70  | 1.83  | 0.46  | 0.03  | 0.23  |
| -1.21 | -1.77 | -0.06 | 1.03  | -1.03 | 8.39  | 28.19 |
| 0.15  | -1.32 | 1.26  | 0.81  | 0.56  | -1.32 | -1.18 |
| -0.04 | -1.18 | 0.41  | -0.19 | -0.31 | 3.05  | 5.66  |

|       |       |       |       |       |       |       |
|-------|-------|-------|-------|-------|-------|-------|
| -0.29 | -0.36 | 0.13  | 1.06  | -0.31 | -0.23 | -0.17 |
| -0.51 | -1.51 | -0.80 | 1.79  | -0.28 | 0.22  | 3.05  |
| 0.44  | -1.63 | 0.01  | 1.78  | 1.51  | -1.56 | -1.01 |
| 1.14  | -1.83 | 0.87  | 1.45  | 0.70  | -1.51 | -1.30 |
| -0.64 | -0.76 | -0.83 | -0.78 | -0.11 | -0.27 | 0.65  |
| 0.82  | -1.51 | 1.56  | 4.18  | -0.23 | 2.33  | 13.01 |
| 0.53  | -1.57 | 1.14  | 2.86  | 1.21  | 1.32  | 8.27  |
| -0.50 | -0.65 | -0.22 | 2.40  | -0.54 | -0.70 | -0.51 |
| -0.08 | -0.25 | -0.13 | -0.06 | -0.22 | -0.24 | -0.19 |
| -1.24 | 4.89  | -1.26 | -1.41 | -1.23 | -1.06 | -0.73 |
| -0.91 | -1.42 | -0.27 | 1.75  | -0.76 | -0.81 | -0.85 |
| -0.45 | -0.81 | 2.90  | 4.35  | -0.04 | -0.28 | 0.25  |
| -0.71 | -1.00 | -0.30 | 1.38  | -0.67 | -0.49 | -0.65 |
| -0.04 | -1.41 | 0.73  | 2.86  | 0.14  | 4.04  | 9.21  |
| -0.39 | -0.40 | -0.39 | -0.26 | -0.36 | -0.34 | -0.40 |
| 0.33  | -0.01 | 0.55  | -0.02 | -0.33 | 1.22  | 0.55  |
| -0.35 | 4.26  | -0.77 | -1.19 | -1.38 | 1.65  | 1.80  |
| -0.73 | -0.86 | 0.44  | 2.47  | -0.56 | -0.68 | -0.12 |
| 0.09  | -1.29 | 0.90  | 2.80  | -0.77 | -0.44 | 0.00  |
| 0.51  | -1.29 | -0.50 | 0.80  | 0.79  | -0.82 | -0.92 |
| -1.09 | -0.78 | 0.85  | -0.17 | -0.62 | 0.48  | 2.56  |
| -0.58 | -1.24 | -0.67 | -0.71 | -0.34 | 2.99  | 5.49  |
| -0.44 | -0.48 | -0.43 | -0.28 | -0.39 | -0.07 | 1.30  |
| -0.06 | 0.37  | -1.13 | -1.07 | -0.29 | 1.74  | 3.41  |
| 0.03  | -1.06 | 2.57  | 2.06  | -0.17 | -0.47 | 0.73  |
| -0.52 | -1.15 | -1.35 | -0.10 | 0.33  | -1.18 | -0.05 |
| 0.75  | -0.54 | -0.48 | -0.28 | 0.10  | 3.97  | 11.09 |
| -0.42 | 0.70  | -1.04 | -1.27 | -0.39 | -0.89 | -1.34 |
| -0.34 | -0.50 | 1.61  | 3.62  | -0.37 | -0.44 | -0.48 |
| -0.47 | -1.23 | -0.75 | 2.20  | -0.28 | 0.05  | 4.71  |
| 0.97  | -1.16 | 0.76  | 3.53  | 0.39  | 19.65 | 91.37 |
| -0.18 | 0.89  | -1.33 | -1.54 | -0.88 | 8.00  | 35.18 |
| -0.64 | -0.94 | -0.47 | 1.74  | -0.43 | -0.91 | -0.83 |
| 1.67  | -1.78 | -0.25 | 0.02  | -0.08 | -1.41 | -0.04 |
| -0.45 | -0.79 | -1.01 | -1.09 | -0.60 | 0.30  | 1.80  |
| 0.85  | -1.48 | -0.30 | 0.06  | 1.39  | 2.14  | 5.08  |
| -0.20 | -0.18 | -0.15 | 0.18  | -0.29 | -0.13 | 0.23  |
| 1.27  | -1.26 | -0.90 | -0.90 | 0.86  | 1.86  | 4.53  |
| -0.53 | -1.07 | -0.15 | 0.52  | -0.59 | -0.94 | -0.61 |
| -0.48 | -0.61 | -0.12 | 2.56  | -0.38 | -0.33 | -0.42 |
| -0.26 | -1.08 | 0.02  | 0.60  | 0.73  | 0.04  | 0.48  |
| 0.25  | 0.03  | -0.64 | -1.46 | 0.18  | 0.80  | 3.37  |
| -0.82 | -0.27 | 0.10  | -1.17 | -0.09 | 4.93  | 16.43 |
| 0.43  | -1.20 | 0.07  | -0.83 | 1.32  | 3.26  | 3.64  |
| -0.60 | -0.77 | -0.06 | 2.27  | -0.58 | -0.71 | -0.65 |
| 0.67  | -0.94 | 0.54  | 1.55  | 0.32  | 6.21  | 6.75  |
| -0.28 | -1.58 | 0.10  | -0.53 | -0.10 | -1.16 | -0.32 |
| 1.26  | -0.25 | -0.68 | -0.64 | 0.68  | 3.48  | 13.87 |

|       |       |       |       |       |       |       |
|-------|-------|-------|-------|-------|-------|-------|
| -0.35 | -0.67 | -0.26 | 0.43  | -0.09 | -0.59 | -0.39 |
| -0.90 | -1.26 | 1.43  | 0.76  | -0.49 | -1.05 | -0.98 |
| -0.66 | -0.93 | -0.16 | 4.48  | -0.50 | -0.63 | -0.24 |
| 0.21  | -1.15 | -0.78 | -0.17 | 0.42  | 12.46 | 39.75 |
| -0.48 | -0.90 | -0.08 | 0.21  | -0.09 | -0.52 | -0.68 |
| -0.65 | -1.04 | -0.29 | 1.91  | -0.65 | 0.26  | -0.15 |
| -0.87 | -1.24 | -0.51 | 0.38  | -0.65 | 4.78  | 5.90  |
| -0.07 | -1.26 | 0.50  | 2.67  | 1.27  | -1.40 | -0.92 |
| 1.91  | -1.43 | -0.17 | -0.16 | 0.66  | 1.57  | 2.86  |
| 0.31  | -1.19 | 1.23  | 2.63  | 0.24  | 9.01  | 18.44 |
| -1.07 | -1.22 | -0.54 | 0.85  | -0.79 | -0.80 | -0.89 |
| 4.13  | -1.28 | 1.78  | 1.65  | 1.57  | -0.25 | 5.93  |
| 4.97  | -0.38 | -0.49 | -0.98 | -0.36 | -0.91 | 0.59  |
| -0.37 | -1.11 | 0.33  | 3.52  | 1.24  | -1.11 | 0.29  |
| -0.77 | -1.22 | -0.34 | 0.64  | -0.61 | 0.13  | 1.26  |
| -0.77 | -1.22 | -0.34 | 0.64  | -0.61 | 0.13  | 1.26  |
| 0.33  | -1.03 | 0.00  | 2.22  | 1.44  | -0.99 | -1.00 |
| -0.38 | -0.43 | 0.05  | 0.83  | -0.56 | 4.30  | 17.41 |
| 1.30  | -0.96 | -0.46 | 0.79  | 0.57  | -1.57 | -1.17 |
| -0.81 | -0.84 | 1.01  | 0.14  | -0.47 | -0.81 | -0.96 |
| -0.20 | -1.10 | 0.74  | 1.94  | 0.65  | -0.58 | 0.34  |
| -0.05 | -0.34 | -0.15 | 0.22  | -0.23 | 0.27  | 1.00  |
| -0.47 | -0.88 | -0.06 | -0.59 | -0.26 | 0.28  | 3.76  |
| 0.13  | -1.09 | -0.85 | 0.08  | 0.20  | 7.67  | 54.32 |
| 0.23  | -1.15 | -0.06 | -0.32 | 0.57  | -0.12 | 1.11  |
| -0.02 | -1.01 | -0.92 | -0.34 | -0.46 | 3.48  | 14.49 |
| -0.06 | -0.66 | -0.76 | -0.59 | -0.26 | 0.02  | -0.28 |
| -0.56 | -0.61 | -0.67 | -0.27 | -0.49 | 2.77  | 2.67  |
| -0.27 | -1.64 | -0.36 | 1.08  | 1.10  | 1.35  | 4.10  |
| -0.56 | -1.39 | 0.16  | 1.75  | -0.19 | -0.54 | 4.25  |
| 0.15  | -0.73 | 0.70  | 0.21  | -0.47 | 6.01  | 14.50 |
| -0.15 | -0.82 | -0.36 | 0.89  | -0.29 | 3.68  | 23.08 |
| 0.06  | -1.54 | 1.42  | 3.90  | 0.55  | 0.53  | 7.55  |

| 33                                                                                             | 34        | 1           | 2          | 3           | 4           | 5       |
|------------------------------------------------------------------------------------------------|-----------|-------------|------------|-------------|-------------|---------|
| 35                                                                                             | 36        | 37          | 38         | 39          | 40          | 41      |
| TGTAACATCCTT TAGCTTATCAGi TCGAGGAGCTCAC TAGCAGCACATC/ CTAGACTGAAGC  TGAGAACTGAAT  CACCCGGCTGTG |           |             |            |             |             |         |
| miR-30e-5p                                                                                     | miR-21-5p | miR-151a-5p | miR-15b-5p | miR-151a-3p | miR-146a-5p | miR-941 |
| 457362                                                                                         | 456843    | 454020      | 436288     | 393199      | 339140      | 313699  |
| -0.35                                                                                          | -0.20     | -1.15       | -0.31      | -0.32       | -0.41       | -0.82   |
| -0.61                                                                                          | -0.24     | 0.25        | 0.05       | 2.84        | 2.17        | 3.71    |
| 0.21                                                                                           | -0.29     | 0.73        | 0.45       | -0.21       | -0.29       | -0.35   |
| -0.18                                                                                          | -0.33     | -0.85       | -0.12      | -0.91       | -0.40       | -0.53   |
| 0.02                                                                                           | -0.04     | 3.24        | 4.79       | 0.42        | 1.57        | 0.86    |
| -0.48                                                                                          | -0.25     | -0.40       | -0.37      | -0.66       | -0.05       | 0.04    |
| -0.53                                                                                          | -0.18     | -0.71       | -0.45      | -0.55       | -0.70       | -0.42   |
| -0.44                                                                                          | -0.32     | -1.52       | -0.20      | -0.95       | -0.70       | 0.30    |
| -0.63                                                                                          | -0.36     | 0.23        | -0.18      | 0.50        | -0.04       | -0.13   |
| -0.58                                                                                          | -0.26     | -0.07       | 0.44       | 1.26        | 0.64        | -0.62   |
| -0.16                                                                                          | -0.18     | 1.75        | -0.43      | 2.90        | 3.69        | 0.66    |
| -0.51                                                                                          | -0.32     | -0.98       | -0.72      | -0.74       | -0.67       | -0.84   |
| 3.39                                                                                           | 4.83      | 0.35        | -0.30      | 0.28        | 0.05        | -0.52   |
| -0.59                                                                                          | -0.34     | -0.98       | -0.14      | -0.71       | -0.58       | 0.37    |
| -0.35                                                                                          | -0.27     | -0.08       | -0.12      | -0.40       | -0.50       | 0.34    |
| 0.86                                                                                           | 0.23      | 1.33        | -0.34      | 0.15        | 0.11        | -0.67   |
| -0.47                                                                                          | -0.32     | -0.75       | 0.06       | -0.80       | -0.54       | 0.10    |
| -0.16                                                                                          | -0.12     | 0.02        | -0.04      | -0.04       | -0.72       | -0.72   |
| -0.14                                                                                          | -0.16     | -0.63       | -0.26      | 0.81        | 0.03        | -0.64   |
| 2.91                                                                                           | 0.96      | 0.86        | -0.52      | -0.23       | -0.19       | -0.50   |



|       |       |       |       |       |       |       |
|-------|-------|-------|-------|-------|-------|-------|
| -0.48 | -0.26 | 0.63  | -0.52 | -0.32 | -0.25 | -0.58 |
| -0.47 | -0.34 | -0.49 | -0.48 | -0.77 | -0.74 | -0.51 |
| -0.34 | -0.25 | -0.05 | -0.27 | -0.57 | -0.62 | -0.37 |
| -0.55 | -0.30 | -0.69 | -0.19 | -0.90 | -0.69 | -0.40 |
| -0.47 | -0.30 | 0.31  | 0.47  | 0.16  | -0.15 | 2.27  |
| 0.04  | -0.27 | -0.25 | -0.03 | -0.52 | 0.02  | 0.45  |
| 1.07  | -0.12 | -0.09 | -0.27 | 0.32  | -0.03 | -0.45 |
| 4.26  | 2.49  | 0.71  | -0.56 | 0.29  | 0.67  | -0.61 |
| 0.41  | 0.21  | -0.27 | -0.57 | 1.54  | 2.56  | 2.06  |
| -0.49 | -0.27 | -0.72 | -0.34 | 1.58  | 1.77  | 0.23  |
| -0.70 | -0.34 | -0.69 | 0.53  | 1.04  | 0.19  | 1.88  |
| 0.03  | 0.11  | 0.49  | -0.24 | 6.29  | 6.51  | 2.43  |
| 0.25  | -0.10 | 4.56  | 4.82  | 1.58  | 1.13  | 0.96  |
| -0.33 | -0.10 | -1.49 | 0.13  | -0.84 | -0.75 | 0.23  |
| -0.35 | 0.04  | -1.30 | 1.63  | -0.26 | -0.69 | 0.33  |
| -0.21 | -0.27 | -0.84 | -0.44 | -0.68 | -0.39 | -0.07 |
| -0.80 | -0.38 | -1.70 | -0.40 | -1.17 | -0.88 | -0.95 |
| -0.35 | 0.28  | -1.10 | -0.40 | 0.75  | 0.07  | -0.74 |
| 1.23  | 1.61  | -0.46 | -0.17 | 1.50  | 0.73  | -0.68 |
| -0.01 | -0.21 | -0.71 | -0.38 | -0.52 | -0.39 | -0.30 |
| -0.09 | -0.15 | -0.85 | -0.27 | -0.75 | -0.58 | 2.43  |
| 0.87  | -0.14 | -0.24 | -0.68 | 0.05  | 0.29  | 1.75  |
| -0.47 | -0.33 | 0.36  | -0.18 | -0.61 | -0.15 | 0.14  |
| 0.67  | 0.72  | -0.44 | 0.02  | 0.01  | -0.54 | 0.10  |
| -0.65 | -0.32 | -0.89 | -0.60 | -0.04 | -0.46 | 0.38  |
| -0.46 | -0.31 | -1.26 | -0.40 | -1.03 | -0.70 | 0.48  |
| 1.22  | -0.19 | 1.95  | -0.28 | -0.11 | 0.50  | -0.43 |
| -0.20 | -0.23 | 0.51  | -0.39 | -0.17 | -0.49 | 0.15  |
| 0.14  | -0.29 | 0.66  | -0.31 | -0.39 | -0.60 | -0.66 |
| 0.01  | -0.32 | 0.07  | -0.46 | -0.66 | -0.35 | -0.57 |
| 0.48  | -0.23 | 0.61  | -0.46 | -0.01 | -0.01 | -1.03 |
| -0.42 | -0.29 | 1.09  | -0.34 | -0.54 | -0.31 | 0.92  |
| -0.56 | -0.30 | 1.22  | 0.03  | -0.47 | -0.52 | 0.03  |
| 0.17  | -0.17 | 1.63  | -0.09 | -0.58 | -0.31 | -0.35 |
| -0.51 | -0.30 | 0.10  | -0.61 | -0.53 | -0.31 | -0.42 |
| -0.54 | -0.34 | 0.44  | -0.01 | -0.61 | -0.32 | 0.50  |
| -0.28 | -0.30 | 1.06  | -0.31 | -0.48 | -0.22 | -0.75 |
| 4.64  | 1.96  | -0.49 | -0.56 | -0.48 | 0.00  | -0.93 |
| -0.43 | -0.32 | -0.67 | -0.19 | -0.52 | -0.36 | 0.37  |
| 0.64  | 0.00  | 0.77  | 0.11  | 0.45  | -0.08 | 0.28  |
| 0.46  | -0.12 | 1.02  | 0.83  | 0.30  | 0.97  | -0.17 |
| 4.03  | 0.79  | 0.25  | -0.36 | -0.19 | -0.38 | -0.71 |
| -0.32 | -0.36 | -0.96 | 0.21  | -0.98 | -0.68 | 0.06  |
| -0.12 | -0.28 | -0.45 | -0.30 | -0.81 | -0.31 | -0.39 |
| 0.33  | -0.33 | 0.50  | -0.25 | -0.22 | 0.20  | -0.71 |
| -0.36 | -0.14 | -0.48 | -0.55 | -0.51 | -0.22 | -1.05 |
| 1.24  | 0.24  | -0.80 | -0.20 | 0.44  | 0.76  | -0.94 |
| -0.73 | -0.19 | 0.23  | 0.56  | 5.63  | 4.06  | 0.93  |
| 0.15  | -0.28 | 2.18  | 2.96  | 0.04  | -0.19 | -0.74 |
| 1.06  | -0.02 | 0.59  | 0.29  | 0.19  | 0.44  | -0.12 |
| -0.17 | -0.27 | -1.17 | -0.33 | -0.78 | -0.46 | -0.31 |
| 0.95  | 0.34  | -1.69 | -0.65 | 0.70  | 0.36  | -1.03 |
| -0.06 | -0.21 | -0.15 | -0.22 | -0.58 | -0.11 | -0.70 |
| 0.52  | -0.01 | -0.03 | -0.30 | -0.11 | 0.39  | -0.56 |
| -0.66 | -0.38 | -1.05 | -0.72 | -1.00 | -0.70 | 1.07  |
| 0.34  | 0.04  | -0.07 | -0.54 | -0.58 | -0.52 | -0.83 |
| -0.36 | -0.24 | -0.19 | -0.30 | 1.53  | 0.68  | 0.67  |
| -0.56 | -0.25 | -0.61 | -0.63 | 2.28  | 0.92  | -0.34 |
| 1.50  | -0.03 | 2.09  | -0.12 | 0.36  | 0.49  | -0.41 |

|       |       |       |       |       |       |       |
|-------|-------|-------|-------|-------|-------|-------|
| 0.73  | -0.19 | 2.10  | -0.34 | -0.01 | 1.31  | -0.68 |
| -0.21 | -0.35 | 0.93  | 0.13  | -0.57 | -0.50 | 0.44  |
| 0.18  | -0.24 | 1.81  | -0.24 | -0.60 | 0.72  | 0.12  |
| -0.11 | -0.30 | -0.03 | -0.65 | -0.87 | -0.69 | -0.84 |
| 4.21  | 2.02  | 0.54  | -0.52 | -0.30 | -0.35 | -0.66 |
| 5.16  | 1.76  | 1.31  | -0.52 | -0.46 | -0.25 | -0.89 |
| 0.05  | -0.34 | 1.06  | -0.47 | 0.15  | -0.43 | -0.67 |
| 0.48  | -0.27 | 0.59  | -0.43 | -0.63 | -0.21 | -0.37 |
| 0.02  | -0.33 | 1.84  | -0.08 | -0.68 | -0.27 | -0.35 |
| 0.22  | 0.25  | -0.21 | -0.53 | -0.09 | -0.05 | -0.12 |
| -0.03 | -0.29 | 1.32  | -0.26 | -0.63 | -0.31 | -0.67 |
| 0.89  | 0.22  | 0.41  | -0.56 | -0.47 | 0.14  | -0.56 |
| -0.47 | -0.29 | -1.10 | -0.60 | -0.81 | -0.61 | -0.17 |
| -0.02 | -0.26 | -0.46 | -0.26 | -0.94 | -0.63 | -0.72 |
| -0.08 | -0.27 | 0.01  | -0.27 | 0.53  | 0.57  | -0.54 |
| 0.29  | -0.06 | -0.31 | 0.01  | 0.60  | 0.26  | -0.60 |

|      |      |      |      |      |      |      |
|------|------|------|------|------|------|------|
| 0    | 0    | -1   | -1   | -1   | -1   | 0    |
| 0.00 | 0.00 | 0.00 | 0.00 | 0.00 | 0.00 | 0.00 |
| 1.00 | 1.00 | 1.00 | 1.00 | 1.00 | 1.00 | 1.00 |
| 0.59 | 0.82 | 0.37 | 0.41 | 0.99 | 0.93 | 0.01 |

| 33           | 34           | 35            | 36            | 37            | 38            | 39             |
|--------------|--------------|---------------|---------------|---------------|---------------|----------------|
| TGTAACATCCTT | TAGCTTATCAGi | TCGAGGAGCTCA( | TAGCAGCACATC? | CTAGACTGAAGC? | TGAGAACTGAAT? | CACCCGGCTGTGT? |
| miR-30e-5p   | miR-21-5p    | miR-151a-5p   | miR-15b-5p    | miR-151a-3p   | miR-146a-5p   | miR-941        |
| 457362       | 456843       | 454020        | 436288        | 393199        | 339140        | 313699         |
| -0.35        | -0.20        | -1.15         | -0.31         | -0.32         | -0.41         | -0.82          |
| -0.61        | -0.24        | 0.25          | 0.05          | 2.84          | 2.17          | 3.71           |
| 0.21         | -0.29        | 0.73          | 0.45          | -0.21         | -0.29         | -0.35          |
| -0.18        | -0.33        | -0.85         | -0.12         | -0.91         | -0.40         | -0.53          |
| 0.02         | -0.04        | 3.24          | 4.79          | 0.42          | 1.57          | 0.86           |
| -0.48        | -0.25        | -0.40         | -0.37         | -0.66         | -0.05         | 0.04           |
| -0.53        | -0.18        | -0.71         | -0.45         | -0.55         | -0.70         | -0.42          |
| -0.44        | -0.32        | -1.52         | -0.20         | -0.95         | -0.70         | 0.30           |
| -0.63        | -0.36        | 0.23          | -0.18         | 0.50          | -0.04         | -0.13          |
| -0.58        | -0.26        | -0.07         | 0.44          | 1.26          | 0.64          | -0.62          |
| -0.16        | -0.18        | 1.75          | -0.43         | 2.90          | 3.69          | 0.66           |
| -0.51        | -0.32        | -0.98         | -0.72         | -0.74         | -0.67         | -0.84          |
| 3.39         | 4.83         | 0.35          | -0.30         | 0.28          | 0.05          | -0.52          |
| -0.59        | -0.34        | -0.98         | -0.14         | -0.71         | -0.58         | 0.37           |
| -0.35        | -0.27        | -0.08         | -0.12         | -0.40         | -0.50         | 0.34           |
| 0.86         | 0.23         | 1.33          | -0.34         | 0.15          | 0.11          | -0.67          |
| -0.47        | -0.32        | -0.75         | 0.06          | -0.80         | -0.54         | 0.10           |
| -0.16        | -0.12        | 0.02          | -0.04         | -0.04         | -0.72         | -0.72          |
| -0.14        | -0.16        | -0.63         | -0.26         | 0.81          | 0.03          | -0.64          |
| 2.91         | 0.96         | 0.86          | -0.52         | -0.23         | -0.19         | -0.50          |
| -0.48        | -0.26        | 0.63          | -0.52         | -0.32         | -0.25         | -0.58          |
| -0.47        | -0.34        | -0.49         | -0.48         | -0.77         | -0.74         | -0.51          |
| -0.34        | -0.25        | -0.05         | -0.27         | -0.57         | -0.62         | -0.37          |
| -0.55        | -0.30        | -0.69         | -0.19         | -0.90         | -0.69         | -0.40          |
| -0.47        | -0.30        | 0.31          | 0.47          | 0.16          | -0.15         | 2.27           |
| 0.04         | -0.27        | -0.25         | -0.03         | -0.52         | 0.02          | 0.45           |
| 1.07         | -0.12        | -0.09         | -0.27         | 0.32          | -0.03         | -0.45          |
| 4.26         | 2.49         | 0.71          | -0.56         | 0.29          | 0.67          | -0.61          |

|       |       |       |       |       |       |       |
|-------|-------|-------|-------|-------|-------|-------|
| 0.41  | 0.21  | -0.27 | -0.57 | 1.54  | 2.56  | 2.06  |
| -0.49 | -0.27 | -0.72 | -0.34 | 1.58  | 1.77  | 0.23  |
| -0.70 | -0.34 | -0.69 | 0.53  | 1.04  | 0.19  | 1.88  |
| 0.03  | 0.11  | 0.49  | -0.24 | 6.29  | 6.51  | 2.43  |
| 0.25  | -0.10 | 4.56  | 4.82  | 1.58  | 1.13  | 0.96  |
| -0.33 | -0.10 | -1.49 | 0.13  | -0.84 | -0.75 | 0.23  |
| -0.35 | 0.04  | -1.30 | 1.63  | -0.26 | -0.69 | 0.33  |
| -0.21 | -0.27 | -0.84 | -0.44 | -0.68 | -0.39 | -0.07 |
| -0.80 | -0.38 | -1.70 | -0.40 | -1.17 | -0.88 | -0.95 |
| -0.35 | 0.28  | -1.10 | -0.40 | 0.75  | 0.07  | -0.74 |
| 1.23  | 1.61  | -0.46 | -0.17 | 1.50  | 0.73  | -0.68 |
| -0.01 | -0.21 | -0.71 | -0.38 | -0.52 | -0.39 | -0.30 |
| -0.09 | -0.15 | -0.85 | -0.27 | -0.75 | -0.58 | 2.43  |
| 0.87  | -0.14 | -0.24 | -0.68 | 0.05  | 0.29  | 1.75  |
| -0.47 | -0.33 | 0.36  | -0.18 | -0.61 | -0.15 | 0.14  |
| 0.67  | 0.72  | -0.44 | 0.02  | 0.01  | -0.54 | 0.10  |
| -0.65 | -0.32 | -0.89 | -0.60 | -0.04 | -0.46 | 0.38  |
| -0.46 | -0.31 | -1.26 | -0.40 | -1.03 | -0.70 | 0.48  |
| 1.22  | -0.19 | 1.95  | -0.28 | -0.11 | 0.50  | -0.43 |
| -0.20 | -0.23 | 0.51  | -0.39 | -0.17 | -0.49 | 0.15  |
| 0.14  | -0.29 | 0.66  | -0.31 | -0.39 | -0.60 | -0.66 |
| 0.01  | -0.32 | 0.07  | -0.46 | -0.66 | -0.35 | -0.57 |
| 0.48  | -0.23 | 0.61  | -0.46 | -0.01 | -0.01 | -1.03 |
| -0.42 | -0.29 | 1.09  | -0.34 | -0.54 | -0.31 | 0.92  |
| -0.56 | -0.30 | 1.22  | 0.03  | -0.47 | -0.52 | 0.03  |
| 0.17  | -0.17 | 1.63  | -0.09 | -0.58 | -0.31 | -0.35 |
| -0.51 | -0.30 | 0.10  | -0.61 | -0.53 | -0.31 | -0.42 |
| -0.54 | -0.34 | 0.44  | -0.01 | -0.61 | -0.32 | 0.50  |
| -0.28 | -0.30 | 1.06  | -0.31 | -0.48 | -0.22 | -0.75 |
| 4.64  | 1.96  | -0.49 | -0.56 | -0.48 | 0.00  | -0.93 |
| -0.43 | -0.32 | -0.67 | -0.19 | -0.52 | -0.36 | 0.37  |
| 0.64  | 0.00  | 0.77  | 0.11  | 0.45  | -0.08 | 0.28  |
| 0.46  | -0.12 | 1.02  | 0.83  | 0.30  | 0.97  | -0.17 |
| 4.03  | 0.79  | 0.25  | -0.36 | -0.19 | -0.38 | -0.71 |
| -0.32 | -0.36 | -0.96 | 0.21  | -0.98 | -0.68 | 0.06  |
| -0.12 | -0.28 | -0.45 | -0.30 | -0.81 | -0.31 | -0.39 |
| 0.33  | -0.33 | 0.50  | -0.25 | -0.22 | 0.20  | -0.71 |
| -0.36 | -0.14 | -0.48 | -0.55 | -0.51 | -0.22 | -1.05 |
| 1.24  | 0.24  | -0.80 | -0.20 | 0.44  | 0.76  | -0.94 |
| -0.73 | -0.19 | 0.23  | 0.56  | 5.63  | 4.06  | 0.93  |
| 0.15  | -0.28 | 2.18  | 2.96  | 0.04  | -0.19 | -0.74 |
| 1.06  | -0.02 | 0.59  | 0.29  | 0.19  | 0.44  | -0.12 |
| -0.17 | -0.27 | -1.17 | -0.33 | -0.78 | -0.46 | -0.31 |
| 0.95  | 0.34  | -1.69 | -0.65 | 0.70  | 0.36  | -1.03 |
| -0.06 | -0.21 | -0.15 | -0.22 | -0.58 | -0.11 | -0.70 |
| 0.52  | -0.01 | -0.03 | -0.30 | -0.11 | 0.39  | -0.56 |
| -0.66 | -0.38 | -1.05 | -0.72 | -1.00 | -0.70 | 1.07  |
| 0.34  | 0.04  | -0.07 | -0.54 | -0.58 | -0.52 | -0.83 |
| -0.36 | -0.24 | -0.19 | -0.30 | 1.53  | 0.68  | 0.67  |
| -0.56 | -0.25 | -0.61 | -0.63 | 2.28  | 0.92  | -0.34 |
| 1.50  | -0.03 | 2.09  | -0.12 | 0.36  | 0.49  | -0.41 |
| 0.73  | -0.19 | 2.10  | -0.34 | -0.01 | 1.31  | -0.68 |
| -0.21 | -0.35 | 0.93  | 0.13  | -0.57 | -0.50 | 0.44  |
| 0.18  | -0.24 | 1.81  | -0.24 | -0.60 | 0.72  | 0.12  |
| -0.11 | -0.30 | -0.03 | -0.65 | -0.87 | -0.69 | -0.84 |
| 4.21  | 2.02  | 0.54  | -0.52 | -0.30 | -0.35 | -0.66 |
| 5.16  | 1.76  | 1.31  | -0.52 | -0.46 | -0.25 | -0.89 |
| 0.05  | -0.34 | 1.06  | -0.47 | 0.15  | -0.43 | -0.67 |
| 0.48  | -0.27 | 0.59  | -0.43 | -0.63 | -0.21 | -0.37 |

|       |       |       |       |       |       |       |
|-------|-------|-------|-------|-------|-------|-------|
| 0.02  | -0.33 | 1.84  | -0.08 | -0.68 | -0.27 | -0.35 |
| 0.22  | 0.25  | -0.21 | -0.53 | -0.09 | -0.05 | -0.12 |
| -0.03 | -0.29 | 1.32  | -0.26 | -0.63 | -0.31 | -0.67 |
| 0.89  | 0.22  | 0.41  | -0.56 | -0.47 | 0.14  | -0.56 |
| -0.47 | -0.29 | -1.10 | -0.60 | -0.81 | -0.61 | -0.17 |
| -0.02 | -0.26 | -0.46 | -0.26 | -0.94 | -0.63 | -0.72 |
| -0.08 | -0.27 | 0.01  | -0.27 | 0.53  | 0.57  | -0.54 |
| 0     | 0     | 0     | 0     | 1     | 0     | -1    |

---

| 33            | 34          | 35            | 36            | 37            | 38            | 39            |
|---------------|-------------|---------------|---------------|---------------|---------------|---------------|
| 73            | 122         | 115           | 135           | 48            | 72            | 39            |
| TGAGGTAGTAAGT | TAACAGTCTAC | AGGCAAGATGCTC | TCGACCGGACCTC | TCTCTCGGCTCCT | CGGGGCAGCTCAC | CACCCGGCTGTGT |
| miR-98-5p     | miR-132-3p  | miR-31-5p     | miR-1307-5p   | miR-3615      | miR-486-3p    | miR-941       |
| 69114         | 15261       | 18520         | 10674         | 198175        | 70256         | 313699        |
| -0.69         | 0.91        | -0.50         | 1.73          | 0.68          | 0.34          | -0.82         |
| 0.68          | -2.06       | -1.48         | -0.86         | -1.33         | 1.41          | 3.71          |
| 0.20          | -0.75       | -0.21         | 0.40          | -0.06         | 0.18          | -0.35         |
| -0.42         | 0.24        | -0.93         | 0.00          | 0.17          | 1.09          | -0.53         |
| -0.04         | -0.87       | 1.96          | -0.86         | -0.81         | -0.48         | 0.86          |
| -0.48         | 0.62        | -0.74         | -0.40         | -0.47         | 0.43          | 0.04          |
| -0.64         | 1.64        | 0.74          | -0.19         | 0.11          | -0.21         | -0.42         |
| -0.81         | 0.91        | -0.46         | -0.55         | 1.49          | 1.71          | 0.30          |
| -0.37         | -0.97       | -1.00         | -0.66         | -0.83         | -0.52         | -0.13         |
| -0.22         | 0.27        | -0.84         | -0.62         | -1.23         | -0.69         | -0.62         |
| 0.18          | -0.59       | 0.28          | -0.47         | -1.04         | -0.98         | 0.66          |
| -0.56         | 0.78        | 0.64          | -0.62         | 2.97          | 0.73          | -0.84         |
| 3.58          | 1.88        | -0.20         | 3.76          | -0.45         | -1.18         | -0.52         |
| -0.77         | 1.28        | -0.23         | -0.65         | 0.26          | 1.84          | 0.37          |
| 0.08          | -0.47       | -0.73         | -0.33         | 0.16          | -0.43         | 0.34          |
| 1.25          | 0.46        | -0.07         | 0.91          | -0.56         | -0.92         | -0.67         |
| -0.80         | 0.45        | 0.82          | -0.24         | -0.09         | -0.33         | 0.10          |
| 0.00          | 0.38        | 0.41          | 0.06          | -0.13         | 0.27          | -0.72         |
| -0.10         | 0.22        | -0.83         | -0.28         | -0.33         | -1.30         | -0.64         |
| 1.50          | -0.57       | 0.21          | 1.46          | -0.22         | -0.85         | -0.50         |
| -0.23         | 0.09        | -0.98         | -0.45         | -0.34         | 0.68          | -0.58         |
| -0.79         | 0.35        | 2.31          | -0.37         | 1.85          | 0.36          | -0.51         |
| -0.63         | -0.24       | 0.71          | -0.33         | 0.78          | 0.67          | -0.37         |
| -0.83         | 0.31        | 0.41          | -0.24         | 1.42          | 1.76          | -0.40         |
| -0.13         | -2.06       | -0.47         | -0.71         | -1.05         | -0.82         | 2.27          |
| -0.66         | -0.72       | 2.20          | -0.23         | -0.37         | -1.30         | 0.45          |
| 1.70          | -1.52       | -1.01         | 0.75          | -0.57         | -1.47         | -0.45         |
| 7.47          | -1.24       | -0.43         | 3.75          | -1.00         | -1.05         | -0.61         |
| 1.54          | -0.10       | -0.45         | 1.44          | -0.70         | -0.93         | 2.06          |
| 0.41          | -0.31       | -1.21         | -0.50         | -0.66         | 0.04          | 0.23          |
| -0.51         | -0.99       | -1.37         | -0.86         | -0.39         | 2.34          | 1.88          |
| 3.02          | -0.63       | -1.15         | -0.53         | -0.92         | -0.57         | 2.43          |
| 0.99          | -1.63       | -0.43         | -0.46         | -1.09         | -0.02         | 0.96          |
| -0.78         | 1.49        | -1.09         | -0.46         | 1.03          | 0.02          | 0.23          |
| -0.70         | 1.57        | -1.18         | -0.37         | 0.94          | 0.12          | 0.33          |
| -0.73         | 1.30        | 4.13          | -0.15         | -0.52         | -0.35         | -0.07         |
| -0.86         | -0.96       | -1.28         | -0.82         | 0.51          | 4.26          | -0.95         |
| 0.44          | -0.46       | 1.78          | -0.36         | -0.84         | -0.77         | -0.74         |
| 2.47          | 0.79        | 1.65          | 0.89          | -1.16         | -1.19         | -0.68         |

|       |       |       |       |       |       |       |
|-------|-------|-------|-------|-------|-------|-------|
| -0.56 | 0.57  | 1.57  | -0.29 | 0.05  | -1.38 | -0.30 |
| -0.68 | -1.57 | -0.25 | 3.68  | 1.30  | 1.65  | 2.43  |
| -0.12 | -1.17 | 5.93  | 23.08 | 5.55  | 1.80  | 1.75  |
| -0.62 | 0.33  | -0.44 | -0.43 | 0.25  | -0.84 | 0.14  |
| 0.54  | 0.76  | -1.00 | 0.57  | 0.30  | -1.21 | 0.10  |
| -0.55 | 1.00  | -0.17 | -0.62 | 1.52  | -0.34 | 0.38  |
| -0.88 | -1.55 | -0.51 | 1.27  | 1.74  | 0.83  | 0.48  |
| -0.12 | -0.04 | 0.00  | 1.23  | -0.79 | -1.36 | -0.43 |
| -0.55 | 1.09  | 1.19  | 0.27  | 1.29  | -0.63 | 0.15  |
| -0.48 | 1.03  | -0.20 | -0.12 | 0.57  | 0.04  | -0.66 |
| -0.77 | 1.08  | 2.30  | -0.02 | 0.27  | -0.51 | -0.57 |
| -0.31 | 1.43  | 1.10  | 0.51  | -0.08 | -0.61 | -1.03 |
| -0.75 | -0.70 | 0.22  | -0.17 | 0.07  | -0.57 | 0.92  |
| -0.63 | 0.75  | -1.19 | -0.57 | -0.33 | 0.43  | 0.03  |
| -0.26 | 1.32  | 0.43  | 0.04  | 0.29  | -0.60 | -0.35 |
| -0.59 | 1.58  | -0.40 | -0.28 | 0.43  | 1.69  | -0.42 |
| -0.80 | 0.34  | -0.30 | -0.60 | -0.06 | 0.44  | 0.50  |
| -0.41 | 0.08  | -0.03 | -0.13 | -0.27 | -0.02 | -0.75 |
| 4.07  | -1.54 | 0.81  | 3.36  | -0.99 | -1.58 | -0.93 |
| -0.61 | -0.77 | 2.36  | -0.40 | 0.69  | -0.58 | 0.37  |
| 0.31  | -1.22 | 1.36  | -0.21 | 0.02  | -1.25 | 0.28  |
| 0.12  | -1.15 | 1.12  | -0.54 | -0.80 | -1.28 | -0.17 |
| 3.39  | -1.83 | -0.05 | 1.84  | -0.74 | -1.61 | -0.71 |
| -0.77 | -0.97 | -0.47 | -0.34 | 0.33  | -0.92 | 0.06  |
| -0.34 | -1.33 | 0.04  | 0.08  | -0.15 | -1.00 | -0.39 |
| 0.17  | -1.15 | -0.94 | 0.00  | -0.72 | -1.29 | -0.71 |
| 0.72  | 1.76  | -0.96 | -0.26 | 2.07  | 0.75  | -1.05 |
| 0.99  | -0.12 | -1.25 | 2.98  | -0.88 | -0.74 | -0.94 |
| 0.88  | 0.18  | -0.11 | -0.86 | -0.68 | -0.93 | 0.93  |
| 0.19  | -0.11 | -0.71 | -0.36 | 0.17  | 5.61  | -0.74 |
| 0.57  | 1.86  | 0.41  | 1.70  | 1.20  | 1.25  | -0.12 |
| -0.42 | 1.47  | -0.72 | -0.23 | 0.83  | 0.90  | -0.31 |
| -0.40 | 0.02  | -0.89 | -0.36 | -0.21 | -0.92 | -1.03 |
| -0.05 | 0.53  | -0.61 | -0.31 | 0.04  | -0.13 | -0.70 |
| 0.64  | 2.38  | 0.43  | -0.14 | -0.21 | -0.72 | -0.56 |
| -0.87 | -1.60 | -0.09 | 12.56 | 6.29  | 1.98  | 1.07  |
| 0.71  | 0.37  | 1.16  | 0.48  | 0.21  | 0.02  | -0.83 |
| 0.03  | -0.16 | 0.44  | -0.53 | -0.62 | -1.15 | 0.67  |
| 0.81  | -0.82 | -1.29 | -0.72 | -0.35 | -0.59 | -0.34 |
| 1.50  | -0.38 | 0.16  | 2.73  | -1.11 | -0.68 | -0.41 |
| 0.42  | -1.13 | -0.43 | 0.56  | -0.92 | -1.16 | -0.68 |
| -0.72 | -0.69 | -0.04 | -0.32 | 0.14  | -0.24 | 0.44  |
| 0.35  | -0.34 | -0.18 | 0.20  | -0.65 | -0.97 | 0.12  |
| -0.72 | 1.80  | 0.69  | -0.08 | 1.86  | 0.20  | -0.84 |
| 2.76  | -0.61 | 1.83  | 1.18  | 0.09  | -1.08 | -0.66 |
| 3.98  | -1.40 | 0.24  | 3.22  | -1.03 | -1.23 | -0.89 |
| -0.68 | -0.30 | -0.08 | 0.05  | 0.11  | -0.42 | -0.67 |
| -0.47 | 0.43  | 0.88  | 0.87  | -0.39 | -1.05 | -0.37 |
| -0.63 | 0.01  | 0.78  | -0.14 | -0.10 | -0.10 | -0.35 |
| 0.66  | 0.19  | 0.01  | 0.31  | -0.27 | -0.49 | -0.12 |
| -0.62 | 0.93  | 0.82  | -0.15 | -0.43 | -0.10 | -0.67 |
| 3.61  | -1.32 | -0.94 | -0.22 | -0.55 | -0.41 | -0.56 |
| -0.62 | 0.88  | -0.86 | -0.40 | 0.20  | -0.22 | -0.17 |
| -0.72 | 0.24  | 0.55  | 0.54  | 0.09  | 0.44  | -0.72 |
| 1.54  | -1.12 | -1.13 | -0.11 | -0.71 | -1.53 | -0.54 |
| 0.16  | -0.76 | -0.98 | 0.69  | -0.42 | -1.33 | -0.60 |
| 0.07  | 0.08  | 0.09  | 0.09  | 0.09  | 0.09  | 0.10  |
| 0.05  | 0.03  | 0.04  | 0.11  | 0.05  | 0.66  | 0.18  |













































































































































































|         |        |         |         |         |         |         |
|---------|--------|---------|---------|---------|---------|---------|
| 2072241 | 4157   | 727386  | 206047  | 2758841 | 2173631 | 852941  |
|         | 1      |         |         |         |         |         |
|         |        |         |         |         |         |         |
|         | 1      |         |         |         |         |         |
| 43      | 44     | 45      | 46      | 47      | 48      | 49      |
| 13      | 14     | 15      | 16      | 17      | 18      | 19      |
| C_48    | C_5    | D_10    | D_12    | D_13    | D_14    | D_3     |
| CHR_NP  | CHR_NP | CHR_NP  | CHR_NP  | CHR_NP  | CHR_NP  | CHR_NP  |
| 3193519 | 141023 | 2632177 | 1206683 | 6374876 | 4715753 | 1806730 |
| 0.18    | 0.47   | 0.89    | 0.71    | 0.66    | 0.72    | 0.77    |
| C_48    | C_5    | D_10    | D_12    | D_13    | D_14    | D_3     |
| 1121278 | 136866 | 1904791 | 1000636 | 3616035 | 2542122 | 953789  |
| 593526  | 288    | 308682  | 28125   | 1230163 | 772506  | 380980  |
| 152869  | 15     | 23073   | 6563    | 199880  | 185575  | 112586  |
| 385992  | 95     | 63225   | 24309   | 229684  | 83193   | 98937   |
| 114740  | 6      | 11822   | 2047    | 157501  | 74283   | 21941   |
| 254736  | 1400   | 89228   | 33653   | 246324  | 96288   | 60780   |
| 27400   | 1      | 2763    | 381     | 42920   | 105430  | 12798   |
| 104908  | 6      | 22052   | 6808    | 86557   | 103298  | 17153   |
| 7545    | 36     | 2512    | 2325    | 3400    | 36567   | 1632    |
| 22013   | 267    | 4185    | 2552    | 27028   | 56592   | 9145    |
| 23827   | 25     | 6144    | 1172    | 37748   | 100568  | 10874   |
| 12756   | 102    | 23750   | 19091   | 35245   | 64172   | 3387    |
| 35505   | 19     | 8613    | 2253    | 45989   | 21913   | 11262   |
| 21950   | 7      | 4686    | 1683    | 25349   | 29263   | 2341    |
| 18735   | 61     | 15532   | 6102    | 31222   | 12564   | 6726    |
| 10207   | 0      | 613     | 202     | 4748    | 17127   | 2018    |
| 12774   | 106    | 8711    | 4731    | 36283   | 14749   | 5776    |
| 9339    | 5      | 790     | 192     | 4484    | 18325   | 1316    |
| 12358   | 5      | 5454    | 2635    | 15964   | 24721   | 4646    |
| 13684   | 4      | 609     | 126     | 10630   | 21944   | 3246    |
| 15631   | 13     | 6584    | 1697    | 19659   | 25876   | 7572    |
| 16830   | 249    | 6083    | 3941    | 8759    | 13123   | 3804    |
| 7357    | 2      | 1802    | 494     | 12074   | 15624   | 1878    |
| 4425    | 0      | 990     | 270     | 6338    | 30600   | 1503    |
| 13111   | 1      | 467     | 230     | 6183    | 13026   | 1523    |
| 8660    | 1      | 1201    | 676     | 3848    | 4041    | 1720    |
| 6792    | 5      | 2657    | 1291    | 13498   | 11428   | 3012    |
| 5710    | 392    | 8014    | 7864    | 10138   | 4225    | 3424    |
| 2119    | 7      | 1372    | 413     | 2137    | 9154    | 844     |
| 4318    | 4      | 1315    | 494     | 10180   | 5410    | 1580    |
| 4042    | 0      | 7254    | 2374    | 13760   | 10216   | 1876    |
| 9334    | 0      | 1073    | 264     | 4796    | 10179   | 3273    |
| 7112    | 0      | 1333    | 440     | 7773    | 2541    | 1568    |
| 3775    | 3      | 1146    | 644     | 2420    | 6848    | 432     |
| 2250    | 3      | 973     | 258     | 1060    | 13550   | 385     |
| 4019    | 4      | 1204    | 459     | 9511    | 4939    | 1450    |
| 5146    | 0      | 2115    | 172     | 9755    | 9678    | 1195    |
| 4433    | 15     | 1060    | 646     | 5290    | 7562    | 2910    |
| 3480    | 10     | 769     | 665     | 6660    | 2609    | 1267    |
| 4769    | 7      | 6449    | 1347    | 9551    | 7122    | 3472    |
| 7744    | 72     | 9122    | 3042    | 2286    | 837     | 6494    |
| 6633    | 4      | 10386   | 2733    | 5644    | 5686    | 1881    |
| 8448    | 15     | 3106    | 999     | 6226    | 4133    | 2206    |
| 2888    | 4      | 3292    | 742     | 6045    | 3709    | 913     |
| 1156    | 12     | 220     | 90      | 439     | 2491    | 342     |
| 7260    | 8      | 1532    | 1263    | 3435    | 1792    | 1277    |

|      |     |      |      |      |      |      |
|------|-----|------|------|------|------|------|
| 3352 | 4   | 978  | 839  | 4376 | 2161 | 1208 |
| 2009 | 1   | 1205 | 1306 | 5353 | 4293 | 505  |
| 3270 | 123 | 1891 | 1190 | 4920 | 3871 | 2530 |
| 135  | 0   | 32   | 32   | 295  | 367  | 27   |
| 1169 | 6   | 758  | 464  | 803  | 5082 | 435  |
| 918  | 179 | 1652 | 870  | 4985 | 1132 | 481  |
| 3210 | 0   | 754  | 231  | 1978 | 5798 | 547  |
| 1434 | 2   | 3074 | 2195 | 3694 | 4232 | 836  |
| 2549 | 0   | 85   | 37   | 1468 | 3465 | 1250 |
| 1239 | 4   | 1707 | 698  | 2379 | 3983 | 266  |
| 113  | 2   | 79   | 29   | 150  | 1017 | 19   |
| 1573 | 3   | 657  | 362  | 2561 | 2812 | 490  |
| 2705 | 3   | 111  | 65   | 1562 | 1896 | 481  |
| 2566 | 0   | 219  | 72   | 1939 | 2073 | 756  |
| 2358 | 7   | 658  | 360  | 4233 | 2077 | 1003 |
| 1390 | 17  | 1142 | 1023 | 3305 | 1620 | 401  |
| 2349 | 63  | 809  | 669  | 1297 | 2676 | 615  |
| 150  | 1   | 8    | 15   | 447  | 721  | 69   |
| 108  | 27  | 25   | 13   | 253  | 160  | 43   |
| 515  | 33  | 234  | 92   | 1463 | 1046 | 801  |
| 552  | 0   | 174  | 42   | 892  | 1651 | 176  |
| 745  | 0   | 176  | 85   | 339  | 1657 | 115  |
| 232  | 0   | 116  | 21   | 430  | 916  | 50   |
| 899  | 0   | 1027 | 513  | 1412 | 2151 | 114  |
| 331  | 0   | 143  | 14   | 722  | 1093 | 162  |
| 1080 | 7   | 831  | 161  | 2138 | 1361 | 662  |
| 412  | 3   | 791  | 212  | 1020 | 540  | 450  |
| 265  | 1   | 61   | 48   | 294  | 1046 | 112  |
| 512  | 1   | 224  | 76   | 563  | 1584 | 203  |
| 1116 | 0   | 95   | 20   | 886  | 1147 | 155  |
| 618  | 29  | 491  | 265  | 1580 | 487  | 409  |
| 747  | 2   | 835  | 328  | 1295 | 1575 | 347  |
| 416  | 3   | 400  | 388  | 1538 | 912  | 354  |
| 921  | 1   | 780  | 301  | 1692 | 668  | 606  |
| 834  | 1   | 208  | 124  | 1425 | 1187 | 228  |
| 813  | 0   | 107  | 59   | 706  | 521  | 80   |
| 834  | 50  | 855  | 493  | 1520 | 847  | 319  |
| 787  | 0   | 147  | 11   | 1322 | 780  | 341  |
| 197  | 1   | 33   | 4    | 296  | 6428 | 22   |
| 400  | 1   | 175  | 197  | 504  | 836  | 55   |
| 702  | 35  | 2554 | 2880 | 1238 | 692  | 154  |
| 564  | 60  | 1136 | 1039 | 1672 | 666  | 660  |
| 224  | 0   | 13   | 6    | 239  | 279  | 74   |
| 516  | 0   | 65   | 45   | 335  | 716  | 123  |
| 448  | 0   | 304  | 145  | 888  | 254  | 319  |
| 856  | 5   | 347  | 152  | 880  | 392  | 425  |
| 9    | 0   | 21   | 16   | 81   | 50   | 4    |
| 633  | 4   | 291  | 130  | 568  | 381  | 99   |
| 181  | 0   | 24   | 15   | 549  | 466  | 63   |
| 107  | 0   | 41   | 8    | 146  | 596  | 16   |
| 618  | 0   | 132  | 46   | 267  | 566  | 120  |
| 554  | 0   | 240  | 121  | 789  | 493  | 545  |
| 429  | 7   | 423  | 274  | 707  | 604  | 343  |
| 824  | 3   | 448  | 124  | 755  | 252  | 412  |
| 65   | 0   | 10   | 4    | 107  | 598  | 29   |
| 492  | 0   | 887  | 245  | 468  | 609  | 69   |
| 304  | 0   | 45   | 23   | 477  | 373  | 106  |
| 688  | 4   | 510  | 399  | 661  | 184  | 211  |
| 465  | 0   | 28   | 20   | 383  | 350  | 86   |

|     |    |     |     |     |     |     |
|-----|----|-----|-----|-----|-----|-----|
| 200 | 1  | 31  | 9   | 152 | 656 | 91  |
| 106 | 0  | 26  | 14  | 68  | 327 | 40  |
| 436 | 3  | 998 | 754 | 594 | 523 | 218 |
| 387 | 0  | 66  | 11  | 418 | 652 | 117 |
| 110 | 0  | 98  | 18  | 125 | 581 | 12  |
| 117 | 1  | 345 | 105 | 118 | 665 | 25  |
| 502 | 0  | 6   | 9   | 272 | 383 | 200 |
| 386 | 0  | 167 | 57  | 470 | 337 | 168 |
| 310 | 3  | 670 | 329 | 648 | 650 | 233 |
| 86  | 0  | 28  | 6   | 157 | 247 | 17  |
| 524 | 0  | 70  | 109 | 240 | 84  | 93  |
| 256 | 0  | 58  | 34  | 413 | 90  | 86  |
| 329 | 0  | 31  | 20  | 294 | 505 | 35  |
| 113 | 0  | 75  | 34  | 256 | 529 | 37  |
| 113 | 0  | 75  | 34  | 256 | 529 | 37  |
| 613 | 0  | 17  | 4   | 262 | 340 | 123 |
| 128 | 16 | 332 | 286 | 398 | 316 | 48  |
| 276 | 0  | 17  | 8   | 336 | 305 | 133 |
| 88  | 0  | 9   | 0   | 136 | 79  | 62  |
| 266 | 1  | 30  | 19  | 125 | 405 | 113 |
| 28  | 0  | 39  | 21  | 50  | 124 | 14  |
| 209 | 1  | 96  | 69  | 350 | 230 | 95  |
| 206 | 31 | 390 | 617 | 417 | 130 | 48  |
| 260 | 0  | 58  | 28  | 326 | 175 | 127 |
| 126 | 2  | 282 | 245 | 382 | 144 | 127 |
| 158 | 0  | 79  | 13  | 353 | 174 | 116 |
| 41  | 0  | 180 | 45  | 162 | 39  | 14  |
| 232 | 1  | 84  | 41  | 174 | 255 | 153 |
| 122 | 0  | 30  | 45  | 351 | 151 | 25  |
| 103 | 0  | 385 | 217 | 156 | 319 | 42  |
| 64  | 29 | 169 | 229 | 65  | 165 | 11  |
| 188 | 6  | 62  | 60  | 300 | 302 | 57  |
| 70  | 0  | 36  | 30  | 155 | 161 | 23  |
| 58  | 1  | 88  | 147 | 134 | 242 | 21  |
| 86  | 0  | 5   | 13  | 193 | 112 | 19  |
| 119 | 2  | 145 | 139 | 391 | 119 | 28  |
| 136 | 6  | 118 | 49  | 225 | 137 | 35  |
| 124 | 1  | 38  | 19  | 144 | 200 | 28  |
| 250 | 1  | 168 | 81  | 111 | 29  | 147 |
| 80  | 0  | 36  | 12  | 179 | 198 | 17  |
| 10  | 0  | 19  | 26  | 23  | 75  | 6   |
| 57  | 1  | 67  | 39  | 174 | 81  | 40  |
| 201 | 0  | 31  | 2   | 143 | 178 | 31  |
| 77  | 0  | 4   | 1   | 101 | 112 | 44  |
| 117 | 0  | 21  | 10  | 203 | 200 | 31  |
| 61  | 1  | 217 | 78  | 112 | 142 | 24  |
| 114 | 0  | 50  | 18  | 85  | 117 | 86  |
| 46  | 0  | 24  | 20  | 58  | 101 | 3   |
| 36  | 0  | 9   | 0   | 61  | 64  | 14  |
| 161 | 1  | 45  | 12  | 153 | 118 | 47  |
| 226 | 0  | 9   | 2   | 46  | 20  | 13  |
| 30  | 0  | 92  | 63  | 179 | 178 | 39  |
| 81  | 0  | 27  | 25  | 67  | 161 | 7   |
| 64  | 0  | 193 | 86  | 222 | 79  | 47  |
| 82  | 2  | 119 | 92  | 153 | 89  | 32  |
| 19  | 1  | 69  | 71  | 150 | 134 | 32  |
| 3   | 0  | 3   | 3   | 19  | 35  | 2   |
| 156 | 2  | 214 | 116 | 143 | 165 | 24  |
| 72  | 3  | 138 | 71  | 122 | 74  | 46  |

|     |   |     |     |     |     |    |
|-----|---|-----|-----|-----|-----|----|
| 66  | 0 | 22  | 6   | 54  | 186 | 18 |
| 74  | 0 | 27  | 33  | 61  | 359 | 2  |
| 62  | 1 | 89  | 31  | 139 | 72  | 43 |
| 84  | 0 | 13  | 1   | 152 | 113 | 22 |
| 95  | 1 | 312 | 223 | 57  | 107 | 81 |
| 54  | 0 | 2   | 0   | 37  | 32  | 7  |
| 25  | 0 | 21  | 10  | 79  | 107 | 12 |
| 151 | 2 | 271 | 79  | 142 | 78  | 22 |
| 51  | 0 | 124 | 23  | 80  | 410 | 5  |
| 166 | 1 | 16  | 12  | 217 | 89  | 65 |
| 102 | 0 | 17  | 1   | 76  | 101 | 60 |
| 88  | 0 | 12  | 1   | 36  | 165 | 26 |
| 77  | 1 | 389 | 116 | 115 | 127 | 31 |
| 17  | 2 | 58  | 48  | 188 | 64  | 13 |
| 76  | 0 | 35  | 24  | 98  | 65  | 33 |
| 64  | 0 | 105 | 62  | 55  | 140 | 12 |
| 40  | 0 | 157 | 29  | 180 | 37  | 28 |
| 103 | 0 | 22  | 12  | 89  | 67  | 41 |
| 22  | 0 | 9   | 6   | 21  | 93  | 8  |
| 18  | 0 | 93  | 40  | 183 | 26  | 4  |
| 52  | 0 | 4   | 1   | 23  | 78  | 31 |
| 28  | 0 | 41  | 20  | 179 | 40  | 37 |
| 82  | 2 | 115 | 118 | 55  | 36  | 24 |
| 22  | 0 | 9   | 5   | 21  | 90  | 8  |
| 29  | 0 | 35  | 7   | 91  | 41  | 5  |
| 70  | 0 | 31  | 69  | 76  | 102 | 19 |
| 76  | 0 | 14  | 7   | 82  | 62  | 21 |
| 2   | 4 | 36  | 51  | 520 | 1   | 22 |
| 24  | 0 | 1   | 0   | 7   | 98  | 24 |
| 77  | 1 | 24  | 18  | 81  | 107 | 18 |
| 83  | 0 | 13  | 2   | 112 | 83  | 97 |
| 31  | 0 | 20  | 13  | 161 | 23  | 25 |
| 49  | 0 | 34  | 28  | 83  | 21  | 17 |
| 16  | 0 | 6   | 0   | 9   | 77  | 6  |
| 29  | 0 | 22  | 9   | 87  | 83  | 25 |
| 33  | 6 | 115 | 95  | 93  | 129 | 6  |
| 61  | 4 | 52  | 46  | 57  | 48  | 10 |
| 101 | 1 | 22  | 11  | 53  | 15  | 62 |
| 57  | 0 | 3   | 2   | 87  | 120 | 70 |
| 46  | 0 | 102 | 66  | 54  | 18  | 37 |
| 32  | 1 | 38  | 18  | 108 | 129 | 27 |
| 19  | 0 | 27  | 5   | 27  | 78  | 1  |
| 20  | 6 | 51  | 50  | 144 | 12  | 3  |
| 58  | 2 | 49  | 34  | 32  | 42  | 14 |
| 69  | 0 | 14  | 2   | 65  | 68  | 36 |
| 29  | 0 | 11  | 21  | 124 | 62  | 19 |
| 19  | 0 | 35  | 24  | 46  | 22  | 21 |
| 75  | 0 | 45  | 30  | 81  | 33  | 28 |
| 95  | 0 | 23  | 4   | 59  | 62  | 52 |
| 14  | 0 | 1   | 0   | 18  | 19  | 11 |
| 54  | 0 | 68  | 41  | 73  | 47  | 9  |
| 19  | 4 | 37  | 21  | 53  | 75  | 12 |
| 80  | 0 | 44  | 37  | 43  | 32  | 42 |
| 61  | 0 | 14  | 8   | 56  | 76  | 9  |
| 61  | 0 | 16  | 13  | 25  | 93  | 15 |
| 1   | 0 | 1   | 1   | 1   | 1   | 0  |
| 45  | 0 | 6   | 0   | 39  | 59  | 5  |
| 8   | 0 | 2   | 0   | 3   | 9   | 3  |
| 35  | 0 | 39  | 34  | 62  | 47  | 14 |

|    |   |     |     |    |     |    |
|----|---|-----|-----|----|-----|----|
| 40 | 0 | 13  | 21  | 39 | 23  | 2  |
| 29 | 1 | 56  | 26  | 19 | 69  | 7  |
| 25 | 0 | 4   | 2   | 49 | 8   | 11 |
| 48 | 0 | 44  | 25  | 47 | 20  | 21 |
| 26 | 0 | 33  | 29  | 45 | 12  | 11 |
| 16 | 1 | 14  | 15  | 49 | 22  | 13 |
| 36 | 0 | 35  | 16  | 64 | 33  | 15 |
| 25 | 0 | 9   | 2   | 32 | 49  | 3  |
| 19 | 0 | 6   | 6   | 14 | 45  | 5  |
| 15 | 0 | 20  | 10  | 34 | 30  | 27 |
| 9  | 0 | 1   | 0   | 5  | 19  | 0  |
| 21 | 0 | 59  | 34  | 65 | 32  | 10 |
| 18 | 0 | 5   | 6   | 27 | 26  | 3  |
| 12 | 2 | 39  | 56  | 45 | 8   | 3  |
| 43 | 0 | 108 | 118 | 51 | 17  | 4  |
| 14 | 0 | 0   | 2   | 8  | 116 | 1  |
| 34 | 1 | 14  | 6   | 10 | 51  | 6  |
| 31 | 0 | 7   | 5   | 26 | 31  | 13 |
| 6  | 0 | 21  | 8   | 56 | 18  | 4  |
| 23 | 0 | 31  | 26  | 15 | 47  | 1  |
| 13 | 0 | 2   | 1   | 5  | 33  | 0  |
| 15 | 0 | 3   | 0   | 24 | 59  | 5  |
| 15 | 0 | 3   | 0   | 24 | 59  | 5  |
| 21 | 0 | 25  | 7   | 59 | 7   | 4  |
| 32 | 0 | 35  | 19  | 32 | 26  | 15 |
| 14 | 0 | 22  | 10  | 21 | 26  | 2  |
| 14 | 0 | 9   | 4   | 41 | 12  | 8  |
| 30 | 0 | 1   | 0   | 17 | 19  | 10 |
| 44 | 0 | 16  | 15  | 42 | 57  | 8  |
| 11 | 0 | 68  | 22  | 21 | 96  | 0  |
| 13 | 0 | 5   | 1   | 17 | 23  | 8  |
| 28 | 0 | 46  | 160 | 26 | 11  | 3  |
| 52 | 0 | 5   | 2   | 12 | 26  | 18 |
| 70 | 0 | 13  | 0   | 61 | 83  | 16 |
| 24 | 0 | 0   | 3   | 19 | 16  | 7  |
| 21 | 0 | 9   | 2   | 23 | 39  | 2  |
| 0  | 0 | 1   | 4   | 2  | 5   | 0  |
| 15 | 0 | 20  | 8   | 36 | 25  | 7  |
| 17 | 0 | 3   | 0   | 12 | 27  | 6  |
| 32 | 1 | 32  | 13  | 22 | 6   | 16 |
| 11 | 0 | 12  | 12  | 39 | 19  | 10 |
| 17 | 0 | 3   | 0   | 9  | 27  | 4  |
| 22 | 1 | 23  | 6   | 61 | 28  | 17 |
| 12 | 0 | 11  | 7   | 44 | 6   | 2  |
| 11 | 0 | 7   | 4   | 14 | 19  | 6  |
| 10 | 0 | 19  | 13  | 23 | 30  | 2  |
| 2  | 0 | 4   | 1   | 2  | 3   | 2  |
| 34 | 1 | 43  | 78  | 20 | 2   | 12 |
| 25 | 1 | 18  | 9   | 25 | 9   | 8  |
| 10 | 2 | 15  | 21  | 44 | 6   | 2  |
| 9  | 0 | 4   | 2   | 40 | 7   | 1  |
| 14 | 0 | 2   | 1   | 16 | 33  | 7  |
| 1  | 0 | 1   | 1   | 2  | 10  | 0  |
| 21 | 0 | 10  | 1   | 23 | 16  | 6  |
| 29 | 0 | 2   | 1   | 10 | 56  | 7  |
| 17 | 0 | 0   | 23  | 1  | 159 | 0  |
| 12 | 0 | 24  | 31  | 14 | 9   | 9  |
| 18 | 0 | 0   | 2   | 14 | 24  | 4  |
| 23 | 0 | 34  | 9   | 24 | 16  | 5  |

|    |   |    |    |    |    |    |
|----|---|----|----|----|----|----|
| 7  | 0 | 38 | 17 | 33 | 4  | 5  |
| 17 | 0 | 4  | 0  | 38 | 14 | 11 |
| 12 | 0 | 11 | 8  | 18 | 6  | 3  |
| 24 | 1 | 20 | 12 | 38 | 23 | 3  |
| 5  | 0 | 10 | 11 | 36 | 13 | 10 |
| 18 | 0 | 14 | 3  | 36 | 17 | 24 |
| 27 | 0 | 1  | 1  | 10 | 50 | 7  |
| 15 | 0 | 2  | 1  | 17 | 9  | 6  |
| 1  | 0 | 3  | 0  | 3  | 12 | 0  |
| 5  | 0 | 0  | 0  | 2  | 23 | 3  |
| 21 | 0 | 0  | 1  | 16 | 9  | 12 |
| 12 | 0 | 30 | 7  | 26 | 36 | 6  |
| 7  | 0 | 14 | 4  | 16 | 50 | 0  |
| 41 | 0 | 8  | 6  | 7  | 6  | 6  |
| 2  | 0 | 15 | 5  | 24 | 2  | 9  |
| 11 | 0 | 0  | 1  | 2  | 23 | 7  |
| 10 | 0 | 8  | 4  | 34 | 10 | 10 |
| 14 | 1 | 36 | 21 | 11 | 13 | 4  |
| 14 | 1 | 39 | 27 | 15 | 11 | 1  |
| 7  | 0 | 0  | 2  | 5  | 3  | 4  |
| 8  | 0 | 10 | 6  | 22 | 2  | 3  |
| 14 | 0 | 7  | 2  | 21 | 4  | 8  |
| 18 | 0 | 27 | 9  | 30 | 3  | 15 |
| 2  | 2 | 2  | 15 | 31 | 14 | 7  |
| 12 | 0 | 2  | 0  | 19 | 9  | 8  |
| 20 | 0 | 9  | 5  | 9  | 10 | 9  |
| 23 | 0 | 19 | 10 | 21 | 3  | 26 |
| 6  | 0 | 27 | 37 | 17 | 7  | 7  |
| 16 | 0 | 19 | 32 | 19 | 7  | 3  |
| 22 | 0 | 2  | 4  | 15 | 17 | 1  |
| 10 | 1 | 1  | 0  | 8  | 10 | 6  |
| 10 | 0 | 0  | 1  | 5  | 14 | 5  |
| 5  | 0 | 0  | 0  | 1  | 10 | 1  |
| 4  | 0 | 1  | 1  | 9  | 19 | 1  |
| 11 | 0 | 0  | 0  | 10 | 8  | 3  |
| 7  | 0 | 21 | 10 | 17 | 19 | 8  |
| 10 | 0 | 3  | 1  | 18 | 13 | 3  |
| 2  | 2 | 13 | 27 | 21 | 8  | 4  |
| 13 | 0 | 9  | 1  | 16 | 7  | 4  |
| 18 | 0 | 6  | 3  | 21 | 18 | 9  |
| 8  | 0 | 5  | 4  | 5  | 15 | 2  |
| 20 | 0 | 3  | 8  | 11 | 4  | 2  |
| 5  | 0 | 8  | 2  | 21 | 5  | 2  |
| 11 | 0 | 4  | 5  | 11 | 10 | 4  |
| 8  | 0 | 0  | 3  | 20 | 10 | 2  |
| 16 | 1 | 0  | 5  | 23 | 50 | 0  |
| 7  | 0 | 9  | 7  | 15 | 5  | 6  |
| 1  | 0 | 5  | 2  | 6  | 11 | 1  |
| 8  | 0 | 26 | 11 | 14 | 16 | 2  |
| 18 | 0 | 5  | 1  | 15 | 9  | 3  |
| 8  | 0 | 12 | 12 | 15 | 2  | 7  |
| 0  | 0 | 0  | 2  | 3  | 10 | 0  |
| 12 | 0 | 29 | 5  | 10 | 14 | 3  |
| 3  | 0 | 1  | 0  | 2  | 11 | 1  |
| 10 | 0 | 6  | 5  | 17 | 11 | 2  |
| 23 | 0 | 8  | 1  | 4  | 6  | 1  |
| 11 | 0 | 5  | 5  | 17 | 7  | 6  |
| 1  | 0 | 0  | 0  | 2  | 2  | 0  |
| 0  | 0 | 9  | 1  | 13 | 5  | 4  |

|    |   |    |    |    |    |    |
|----|---|----|----|----|----|----|
| 7  | 0 | 1  | 3  | 19 | 5  | 2  |
| 2  | 0 | 3  | 7  | 16 | 5  | 7  |
| 18 | 1 | 6  | 3  | 5  | 2  | 7  |
| 14 | 0 | 4  | 2  | 15 | 10 | 3  |
| 7  | 0 | 5  | 3  | 11 | 16 | 8  |
| 16 | 0 | 8  | 9  | 16 | 5  | 3  |
| 5  | 0 | 6  | 13 | 12 | 8  | 1  |
| 0  | 0 | 1  | 0  | 5  | 9  | 0  |
| 7  | 0 | 7  | 4  | 10 | 10 | 0  |
| 9  | 0 | 3  | 0  | 19 | 7  | 2  |
| 9  | 0 | 7  | 8  | 19 | 18 | 5  |
| 20 | 0 | 2  | 1  | 3  | 6  | 2  |
| 8  | 0 | 0  | 8  | 5  | 1  | 8  |
| 3  | 0 | 0  | 0  | 1  | 12 | 0  |
| 14 | 0 | 4  | 1  | 9  | 3  | 2  |
| 5  | 0 | 5  | 5  | 7  | 10 | 1  |
| 13 | 0 | 2  | 2  | 8  | 14 | 1  |
| 3  | 0 | 10 | 4  | 13 | 6  | 3  |
| 3  | 0 | 2  | 6  | 6  | 12 | 1  |
| 9  | 0 | 19 | 6  | 12 | 13 | 0  |
| 11 | 0 | 1  | 5  | 1  | 9  | 3  |
| 12 | 0 | 1  | 1  | 9  | 29 | 4  |
| 6  | 0 | 0  | 0  | 10 | 5  | 1  |
| 3  | 0 | 1  | 0  | 14 | 9  | 4  |
| 0  | 0 | 2  | 8  | 14 | 6  | 0  |
| 8  | 0 | 9  | 6  | 14 | 8  | 1  |
| 4  | 0 | 0  | 1  | 0  | 3  | 0  |
| 3  | 0 | 4  | 0  | 1  | 17 | 0  |
| 4  | 0 | 6  | 1  | 12 | 11 | 5  |
| 5  | 0 | 3  | 0  | 5  | 6  | 0  |
| 26 | 0 | 0  | 6  | 5  | 18 | 1  |
| 0  | 0 | 7  | 2  | 9  | 4  | 1  |
| 5  | 0 | 5  | 1  | 4  | 6  | 0  |
| 12 | 0 | 2  | 1  | 4  | 9  | 8  |
| 0  | 0 | 0  | 1  | 1  | 3  | 1  |
| 2  | 0 | 5  | 1  | 17 | 3  | 1  |
| 7  | 0 | 1  | 3  | 3  | 1  | 4  |
| 6  | 0 | 16 | 6  | 6  | 2  | 0  |
| 5  | 1 | 12 | 3  | 8  | 5  | 7  |
| 12 | 0 | 6  | 0  | 9  | 6  | 3  |
| 12 | 0 | 9  | 9  | 1  | 1  | 14 |
| 11 | 0 | 2  | 2  | 2  | 3  | 0  |
| 7  | 0 | 1  | 0  | 4  | 3  | 0  |
| 4  | 0 | 5  | 0  | 8  | 3  | 1  |
| 7  | 0 | 5  | 4  | 2  | 3  | 1  |
| 13 | 1 | 10 | 2  | 8  | 11 | 1  |
| 1  | 0 | 0  | 2  | 8  | 4  | 1  |
| 2  | 1 | 5  | 3  | 14 | 6  | 7  |
| 2  | 0 | 0  | 0  | 1  | 7  | 2  |
| 6  | 0 | 2  | 2  | 2  | 0  | 0  |
| 4  | 0 | 13 | 3  | 10 | 7  | 2  |
| 2  | 0 | 3  | 0  | 9  | 3  | 0  |
| 5  | 0 | 2  | 0  | 0  | 8  | 1  |
| 3  | 0 | 9  | 9  | 1  | 4  | 0  |
| 8  | 0 | 0  | 0  | 4  | 4  | 3  |
| 2  | 0 | 0  | 0  | 1  | 2  | 2  |
| 6  | 0 | 2  | 1  | 2  | 7  | 0  |
| 7  | 0 | 4  | 1  | 6  | 8  | 0  |
| 1  | 0 | 1  | 12 | 0  | 13 | 1  |



|    |   |    |   |    |    |   |
|----|---|----|---|----|----|---|
| 2  | 0 | 0  | 0 | 1  | 9  | 1 |
| 1  | 0 | 2  | 3 | 8  | 8  | 0 |
| 7  | 0 | 0  | 1 | 2  | 1  | 5 |
| 6  | 1 | 0  | 2 | 1  | 1  | 4 |
| 9  | 0 | 6  | 4 | 5  | 3  | 1 |
| 1  | 0 | 1  | 4 | 10 | 0  | 1 |
| 8  | 0 | 4  | 3 | 7  | 5  | 0 |
| 4  | 0 | 6  | 8 | 2  | 5  | 0 |
| 4  | 0 | 1  | 1 | 3  | 3  | 2 |
| 3  | 0 | 3  | 0 | 2  | 4  | 2 |
| 1  | 0 | 0  | 0 | 0  | 12 | 1 |
| 0  | 0 | 0  | 0 | 0  | 2  | 0 |
| 0  | 0 | 0  | 0 | 0  | 2  | 0 |
| 3  | 0 | 1  | 0 | 0  | 1  | 1 |
| 9  | 0 | 7  | 8 | 8  | 6  | 5 |
| 1  | 0 | 10 | 5 | 9  | 1  | 3 |
| 1  | 0 | 3  | 6 | 7  | 4  | 0 |
| 1  | 0 | 0  | 1 | 10 | 4  | 3 |
| 0  | 0 | 0  | 0 | 0  | 0  | 0 |
| 0  | 0 | 1  | 1 | 9  | 5  | 0 |
| 2  | 0 | 1  | 4 | 6  | 2  | 0 |
| 2  | 0 | 0  | 0 | 1  | 6  | 0 |
| 2  | 0 | 3  | 0 | 6  | 8  | 2 |
| 4  | 0 | 3  | 9 | 4  | 1  | 1 |
| 1  | 0 | 5  | 1 | 0  | 3  | 2 |
| 0  | 0 | 0  | 0 | 0  | 2  | 0 |
| 3  | 0 | 4  | 2 | 9  | 2  | 0 |
| 4  | 0 | 0  | 0 | 0  | 10 | 1 |
| 0  | 0 | 2  | 0 | 9  | 3  | 1 |
| 5  | 0 | 0  | 0 | 7  | 6  | 3 |
| 0  | 0 | 0  | 1 | 0  | 0  | 0 |
| 3  | 0 | 0  | 0 | 6  | 5  | 1 |
| 2  | 0 | 0  | 1 | 2  | 5  | 2 |
| 1  | 0 | 4  | 2 | 2  | 0  | 3 |
| 2  | 0 | 1  | 0 | 2  | 3  | 1 |
| 3  | 0 | 1  | 0 | 6  | 6  | 3 |
| 5  | 0 | 6  | 1 | 5  | 0  | 2 |
| 4  | 0 | 1  | 1 | 8  | 5  | 0 |
| 6  | 0 | 1  | 0 | 6  | 1  | 1 |
| 1  | 0 | 0  | 0 | 7  | 1  | 1 |
| 0  | 0 | 0  | 0 | 0  | 1  | 0 |
| 4  | 0 | 1  | 0 | 4  | 4  | 1 |
| 2  | 0 | 1  | 0 | 7  | 4  | 2 |
| 0  | 0 | 0  | 3 | 3  | 3  | 0 |
| 1  | 0 | 0  | 0 | 1  | 12 | 2 |
| 0  | 0 | 0  | 0 | 1  | 2  | 0 |
| 1  | 0 | 0  | 0 | 1  | 3  | 0 |
| 10 | 0 | 5  | 1 | 6  | 4  | 0 |
| 5  | 0 | 13 | 2 | 4  | 9  | 1 |
| 3  | 0 | 0  | 0 | 7  | 0  | 0 |
| 4  | 0 | 1  | 0 | 3  | 0  | 2 |
| 1  | 0 | 1  | 0 | 0  | 0  | 1 |
| 4  | 1 | 1  | 1 | 5  | 1  | 2 |
| 5  | 0 | 1  | 4 | 2  | 12 | 0 |
| 5  | 0 | 0  | 0 | 5  | 2  | 1 |
| 3  | 0 | 0  | 0 | 4  | 4  | 0 |
| 1  | 0 | 4  | 1 | 2  | 5  | 0 |
| 0  | 0 | 4  | 3 | 3  | 3  | 1 |
| 0  | 0 | 10 | 1 | 6  | 2  | 1 |

|   |   |    |   |   |   |   |
|---|---|----|---|---|---|---|
| 3 | 0 | 22 | 0 | 4 | 2 | 0 |
| 2 | 0 | 2  | 2 | 9 | 2 | 0 |
| 4 | 0 | 1  | 0 | 2 | 4 | 2 |
| 2 | 0 | 2  | 1 | 3 | 8 | 2 |
| 0 | 0 | 1  | 1 | 3 | 4 | 0 |
| 3 | 0 | 1  | 0 | 0 | 3 | 0 |
| 2 | 0 | 3  | 0 | 8 | 2 | 0 |
| 0 | 0 | 1  | 0 | 0 | 1 | 1 |
| 4 | 0 | 1  | 1 | 2 | 4 | 2 |
| 0 | 0 | 0  | 0 | 0 | 0 | 0 |
| 0 | 0 | 0  | 4 | 0 | 0 | 1 |
| 1 | 0 | 3  | 1 | 2 | 2 | 4 |
| 0 | 0 | 0  | 1 | 1 | 6 | 0 |
| 0 | 1 | 0  | 1 | 1 | 0 | 1 |
| 0 | 0 | 0  | 0 | 1 | 0 | 1 |
| 1 | 0 | 0  | 0 | 2 | 5 | 0 |
| 1 | 0 | 3  | 0 | 4 | 2 | 1 |
| 0 | 0 | 0  | 0 | 1 | 0 | 0 |
| 1 | 0 | 0  | 0 | 0 | 0 | 1 |
| 2 | 0 | 1  | 0 | 0 | 3 | 1 |
| 2 | 0 | 3  | 0 | 2 | 2 | 1 |
| 0 | 0 | 1  | 0 | 0 | 1 | 0 |
| 0 | 0 | 0  | 0 | 0 | 4 | 2 |
| 3 | 0 | 3  | 1 | 2 | 3 | 1 |
| 5 | 0 | 6  | 2 | 0 | 1 | 2 |
| 7 | 0 | 0  | 0 | 2 | 3 | 2 |
| 6 | 0 | 1  | 0 | 1 | 2 | 5 |
| 2 | 0 | 1  | 1 | 3 | 1 | 1 |
| 0 | 0 | 0  | 0 | 0 | 2 | 0 |
| 0 | 0 | 3  | 0 | 1 | 1 | 0 |
| 3 | 0 | 3  | 1 | 2 | 4 | 3 |
| 0 | 0 | 1  | 0 | 2 | 2 | 1 |
| 1 | 0 | 8  | 0 | 7 | 1 | 0 |
| 4 | 0 | 5  | 1 | 7 | 2 | 0 |
| 2 | 0 | 2  | 3 | 2 | 4 | 0 |
| 0 | 1 | 16 | 5 | 4 | 3 | 1 |
| 0 | 0 | 3  | 1 | 1 | 3 | 1 |
| 2 | 0 | 2  | 0 | 0 | 2 | 0 |
| 4 | 0 | 1  | 0 | 0 | 0 | 4 |
| 0 | 0 | 0  | 0 | 1 | 5 | 0 |
| 2 | 0 | 3  | 0 | 7 | 1 | 1 |
| 2 | 0 | 0  | 0 | 1 | 0 | 1 |
| 2 | 0 | 2  | 1 | 5 | 0 | 3 |
| 4 | 0 | 0  | 0 | 2 | 4 | 2 |
| 3 | 0 | 0  | 0 | 2 | 0 | 1 |
| 1 | 0 | 6  | 1 | 3 | 0 | 4 |
| 0 | 0 | 1  | 0 | 3 | 0 | 0 |
| 1 | 0 | 4  | 3 | 0 | 1 | 0 |
| 0 | 0 | 2  | 2 | 4 | 5 | 1 |
| 2 | 0 | 3  | 2 | 4 | 3 | 2 |
| 0 | 0 | 1  | 0 | 0 | 1 | 0 |
| 0 | 0 | 0  | 0 | 1 | 3 | 0 |
| 1 | 0 | 1  | 0 | 0 | 4 | 0 |
| 0 | 0 | 2  | 1 | 1 | 2 | 1 |
| 4 | 0 | 2  | 1 | 1 | 1 | 1 |
| 2 | 0 | 1  | 0 | 2 | 9 | 4 |
| 5 | 1 | 3  | 0 | 1 | 5 | 2 |
| 0 | 0 | 0  | 0 | 0 | 1 | 1 |

|         |        |         |         |         |         |        |
|---------|--------|---------|---------|---------|---------|--------|
| 1       | 0      | 0       | 0       | 1       | 3       | 0      |
| 3       | 0      | 0       | 1       | 0       | 1       | 2      |
| 1       | 0      | 2       | 0       | 0       | 1       | 0      |
| 3       | 0      | 0       | 0       | 2       | 0       | 0      |
| 0       | 0      | 0       | 0       | 6       | 3       | 0      |
| 1       | 0      | 1       | 0       | 1       | 1       | 0      |
| 2       | 0      | 3       | 1       | 1       | 3       | 6      |
| 0       | 0      | 1       | 1       | 6       | 0       | 1      |
| 2       | 0      | 7       | 2       | 1       | 4       | 2      |
| 0       | 0      | 0       | 1       | 0       | 10      | 1      |
| 2       | 0      | 4       | 0       | 0       | 1       | 0      |
| 0       | 0      | 3       | 0       | 0       | 1       | 0      |
| 0       | 22     | 0       | 0       | 0       | 0       | 0      |
| C_48    | C_5    | D_10    | D_12    | D_13    | D_14    | D_3    |
| CHR_NP  | CHR_NP | CHR_NP  | CHR_NP  | CHR_NP  | CHR_NP  | CHR_NP |
| 1121278 | 136866 | 1904791 | 1000636 | 3616035 | 2542122 | 953789 |
| 11      | 30     | 23      | 27      | 18      | 17      | 17     |
| -2.09   | 1.88   | 0.39    | 1.11    | -0.68   | -0.83   | -0.94  |

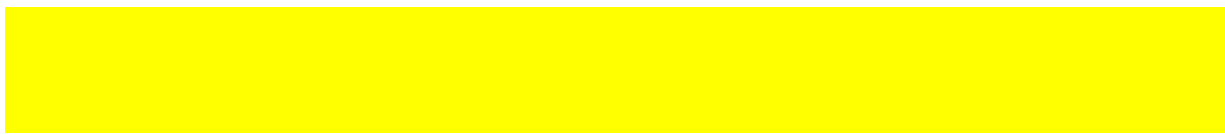

|         |         |        |        |         |         |         |
|---------|---------|--------|--------|---------|---------|---------|
| 0.78    | 0.82    | 0.36   | 0.07   | 0.20    | 0.25    | 0.31    |
| 12      | 11      | 19     | 32     | 29      | 26      | 21      |
| 1       | 1       | 1      | 1      | 1       | 1       | 1       |
| 43      | 44      | 45     | 46     | 47      | 48      | 49      |
| 16      | 17      | 18     | 19     | 20      | 21      | 22      |
| D_13    | D_14    | D_3    | D_9    | E_20    | E_29    | E_4     |
| CHR_NP  | CHR_NP  | CHR_NP | CHR_NP | CHR_NP  | CHR_NP  | CHR_NP  |
| 2758841 | 2173631 | 852941 | 239935 | 1893208 | 1240451 | 2304775 |
| D_13    | D_14    | D_3    | D_9    | E_20    | E_29    | E_4     |
| 1230163 | 772506  | 380980 | 122679 | 389983  | 434200  | 899048  |
| 199880  | 185575  | 112586 | 4360   | 256917  | 87950   | 162314  |
| 229684  | 83193   | 98937  | 12343  | 135742  | 104686  | 168898  |
| 157501  | 74283   | 21941  | 2068   | 88459   | 83637   | 78820   |
| 246324  | 96288   | 60780  | 39570  | 121914  | 149724  | 164506  |
| 42920   | 105430  | 12798  | 1297   | 138924  | 19072   | 128682  |
| 86557   | 103298  | 17153  | 6148   | 189457  | 55740   | 89051   |
| 3400    | 36567   | 1632   | 453    | 18376   | 3407    | 35682   |
| 27028   | 56592   | 9145   | 1444   | 60543   | 20112   | 79855   |
| 37748   | 100568  | 10874  | 949    | 33423   | 16296   | 33869   |
| 35245   | 64172   | 3387   | 4340   | 14649   | 11862   | 19996   |
| 45989   | 21913   | 11262  | 2892   | 33311   | 26726   | 63887   |
| 25349   | 29263   | 2341   | 966    | 21311   | 11884   | 14690   |
| 31222   | 12564   | 6726   | 5265   | 10244   | 11251   | 23877   |
| 4748    | 17127   | 2018   | 146    | 12249   | 5069    | 11310   |
| 36283   | 14749   | 5776   | 4360   | 14452   | 19783   | 30744   |
| 4484    | 18325   | 1316   | 165    | 16723   | 3485    | 9674    |
| 15964   | 24721   | 4646   | 794    | 12614   | 9448    | 22251   |
| 10630   | 21944   | 3246   | 172    | 20440   | 4826    | 16228   |

|       |       |      |      |       |       |       |
|-------|-------|------|------|-------|-------|-------|
| 19659 | 25876 | 7572 | 1368 | 15097 | 12160 | 9087  |
| 8759  | 13123 | 3804 | 832  | 10639 | 7806  | 8818  |
| 12074 | 15624 | 1878 | 295  | 6410  | 4200  | 9798  |
| 6338  | 30600 | 1503 | 89   | 11806 | 6426  | 5072  |
| 6183  | 13026 | 1523 | 74   | 30945 | 4146  | 12014 |
| 3848  | 4041  | 1720 | 181  | 12014 | 2145  | 3273  |
| 13498 | 11428 | 3012 | 491  | 10595 | 5810  | 12898 |
| 10138 | 4225  | 3424 | 3164 | 3971  | 6324  | 8727  |
| 2137  | 9154  | 844  | 225  | 4317  | 1897  | 9309  |
| 10180 | 5410  | 1580 | 306  | 11047 | 4712  | 9403  |
| 13760 | 10216 | 1876 | 1144 | 8071  | 6087  | 5189  |
| 4796  | 10179 | 3273 | 173  | 15625 | 5490  | 15629 |
| 7773  | 2541  | 1568 | 311  | 5170  | 5106  | 4727  |
| 2420  | 6848  | 432  | 211  | 8030  | 1759  | 4918  |
| 1060  | 13550 | 385  | 117  | 2224  | 1179  | 1443  |
| 9511  | 4939  | 1450 | 280  | 10370 | 4460  | 8887  |
| 9755  | 9678  | 1195 | 563  | 5536  | 3045  | 6668  |
| 5290  | 7562  | 2910 | 190  | 5926  | 3775  | 5773  |
| 6660  | 2609  | 1267 | 176  | 8080  | 1710  | 2449  |
| 9551  | 7122  | 3472 | 1015 | 3615  | 4264  | 3159  |
| 2286  | 837   | 6494 | 3700 | 3582  | 2940  | 2314  |
| 5644  | 5686  | 1881 | 2104 | 5684  | 4438  | 4198  |
| 6226  | 4133  | 2206 | 905  | 3620  | 3242  | 3567  |
| 6045  | 3709  | 913  | 840  | 4933  | 2476  | 5529  |
| 439   | 2491  | 342  | 29   | 1420  | 336   | 1352  |
| 3435  | 1792  | 1277 | 212  | 4902  | 2611  | 3671  |
| 4376  | 2161  | 1208 | 210  | 5572  | 3584  | 4328  |
| 5353  | 4293  | 505  | 243  | 4614  | 1861  | 2385  |
| 4920  | 3871  | 2530 | 744  | 1477  | 3362  | 4775  |
| 295   | 367   | 27   | 23   | 338   | 162   | 616   |
| 803   | 5082  | 435  | 51   | 3054  | 1345  | 1917  |
| 4985  | 1132  | 481  | 311  | 2097  | 2013  | 605   |
| 1978  | 5798  | 547  | 69   | 3858  | 1336  | 2036  |
| 3694  | 4232  | 836  | 855  | 1586  | 1244  | 2444  |
| 1468  | 3465  | 1250 | 17   | 2990  | 1379  | 1240  |
| 2379  | 3983  | 266  | 477  | 2996  | 1905  | 1145  |
| 150   | 1017  | 19   | 13   | 247   | 111   | 382   |
| 2561  | 2812  | 490  | 116  | 2901  | 835   | 2672  |
| 1562  | 1896  | 481  | 43   | 3742  | 2007  | 2472  |
| 1939  | 2073  | 756  | 81   | 1716  | 988   | 1041  |
| 4233  | 2077  | 1003 | 168  | 2103  | 660   | 2449  |
| 3305  | 1620  | 401  | 158  | 1268  | 1255  | 1628  |
| 1297  | 2676  | 615  | 137  | 1917  | 1288  | 1637  |
| 447   | 721   | 69   | 11   | 394   | 49    | 481   |
| 253   | 160   | 43   | 22   | 463   | 83    | 204   |
| 1463  | 1046  | 801  | 158  | 375   | 991   | 2321  |
| 892   | 1651  | 176  | 43   | 1159  | 357   | 1198  |
| 339   | 1657  | 115  | 19   | 962   | 450   | 1277  |
| 430   | 916   | 50   | 24   | 516   | 139   | 671   |
| 1412  | 2151  | 114  | 117  | 1805  | 550   | 1314  |
| 722   | 1093  | 162  | 33   | 1023  | 176   | 1219  |
| 2138  | 1361  | 662  | 276  | 1048  | 1071  | 1559  |
| 1020  | 540   | 450  | 210  | 379   | 532   | 1490  |
| 294   | 1046  | 112  | 5    | 501   | 159   | 354   |
| 563   | 1584  | 203  | 31   | 633   | 375   | 992   |
| 886   | 1147  | 155  | 15   | 3022  | 643   | 1094  |
| 1580  | 487   | 409  | 90   | 423   | 988   | 238   |
| 1295  | 1575  | 347  | 238  | 1196  | 593   | 967   |
| 1538  | 912   | 354  | 66   | 921   | 242   | 714   |

|      |      |     |     |      |     |      |
|------|------|-----|-----|------|-----|------|
| 1692 | 668  | 606 | 257 | 446  | 743 | 867  |
| 1425 | 1187 | 228 | 33  | 616  | 697 | 859  |
| 706  | 521  | 80  | 22  | 1099 | 316 | 825  |
| 1520 | 847  | 319 | 228 | 646  | 794 | 1116 |
| 1322 | 780  | 341 | 67  | 526  | 571 | 923  |
| 296  | 6428 | 22  | 2   | 435  | 474 | 213  |
| 504  | 836  | 55  | 18  | 1648 | 250 | 272  |
| 1238 | 692  | 154 | 421 | 671  | 482 | 839  |
| 1672 | 666  | 660 | 389 | 477  | 668 | 1088 |
| 239  | 279  | 74  | 7   | 537  | 116 | 823  |
| 335  | 716  | 123 | 7   | 996  | 476 | 842  |
| 888  | 254  | 319 | 67  | 674  | 325 | 306  |
| 880  | 392  | 425 | 60  | 651  | 464 | 429  |
| 81   | 50   | 4   | 6   | 28   | 15  | 97   |
| 568  | 381  | 99  | 67  | 967  | 382 | 1112 |
| 549  | 466  | 63  | 2   | 572  | 212 | 1030 |
| 146  | 596  | 16  | 10  | 333  | 78  | 348  |
| 267  | 566  | 120 | 26  | 642  | 259 | 492  |
| 789  | 493  | 545 | 96  | 306  | 494 | 418  |
| 707  | 604  | 343 | 124 | 312  | 511 | 626  |
| 755  | 252  | 412 | 118 | 404  | 357 | 350  |
| 107  | 598  | 29  | 1   | 172  | 34  | 218  |
| 468  | 609  | 69  | 142 | 260  | 169 | 277  |
| 477  | 373  | 106 | 17  | 749  | 334 | 525  |
| 661  | 184  | 211 | 233 | 277  | 324 | 271  |
| 383  | 350  | 86  | 4   | 310  | 111 | 220  |
| 152  | 656  | 91  | 13  | 291  | 87  | 432  |
| 68   | 327  | 40  | 2   | 133  | 52  | 171  |
| 594  | 523  | 218 | 282 | 422  | 296 | 537  |
| 418  | 652  | 117 | 10  | 811  | 290 | 369  |
| 125  | 581  | 12  | 20  | 249  | 99  | 315  |
| 118  | 665  | 25  | 71  | 164  | 118 | 281  |
| 272  | 383  | 200 | 1   | 392  | 231 | 454  |
| 470  | 337  | 168 | 45  | 308  | 247 | 330  |
| 648  | 650  | 233 | 55  | 272  | 152 | 309  |
| 157  | 247  | 17  | 6   | 186  | 40  | 184  |
| 240  | 84   | 93  | 19  | 226  | 272 | 246  |
| 413  | 90   | 86  | 6   | 135  | 217 | 140  |
| 294  | 505  | 35  | 9   | 266  | 133 | 223  |
| 256  | 529  | 37  | 14  | 309  | 136 | 304  |
| 256  | 529  | 37  | 14  | 309  | 136 | 304  |
| 262  | 340  | 123 | 5   | 170  | 80  | 208  |
| 398  | 316  | 48  | 111 | 177  | 117 | 427  |
| 336  | 305  | 133 | 6   | 189  | 196 | 362  |
| 136  | 79   | 62  | 5   | 362  | 243 | 90   |
| 125  | 405  | 113 | 3   | 240  | 186 | 249  |
| 50   | 124  | 14  | 3   | 65   | 22  | 42   |
| 350  | 230  | 95  | 29  | 123  | 171 | 309  |
| 417  | 130  | 48  | 125 | 250  | 83  | 120  |
| 326  | 175  | 127 | 12  | 206  | 172 | 274  |
| 382  | 144  | 127 | 59  | 208  | 105 | 158  |
| 353  | 174  | 116 | 40  | 184  | 145 | 171  |
| 162  | 39   | 14  | 34  | 106  | 38  | 88   |
| 174  | 255  | 153 | 13  | 190  | 122 | 208  |
| 351  | 151  | 25  | 0   | 269  | 78  | 164  |
| 156  | 319  | 42  | 118 | 201  | 99  | 162  |
| 65   | 165  | 11  | 27  | 208  | 75  | 92   |
| 300  | 302  | 57  | 16  | 207  | 108 | 122  |
| 155  | 161  | 23  | 16  | 157  | 66  | 182  |

|     |     |     |    |     |     |     |
|-----|-----|-----|----|-----|-----|-----|
| 134 | 242 | 21  | 26 | 78  | 83  | 308 |
| 193 | 112 | 19  | 0  | 208 | 77  | 173 |
| 391 | 119 | 28  | 30 | 185 | 88  | 212 |
| 225 | 137 | 35  | 34 | 195 | 145 | 141 |
| 144 | 200 | 28  | 5  | 197 | 84  | 256 |
| 111 | 29  | 147 | 82 | 81  | 79  | 157 |
| 179 | 198 | 17  | 12 | 236 | 91  | 135 |
| 23  | 75  | 6   | 1  | 14  | 2   | 24  |
| 174 | 81  | 40  | 18 | 38  | 66  | 214 |
| 143 | 178 | 31  | 8  | 125 | 119 | 176 |
| 101 | 112 | 44  | 1  | 347 | 125 | 212 |
| 203 | 200 | 31  | 11 | 99  | 37  | 154 |
| 112 | 142 | 24  | 68 | 87  | 70  | 155 |
| 85  | 117 | 86  | 7  | 109 | 37  | 68  |
| 58  | 101 | 3   | 2  | 76  | 32  | 86  |
| 61  | 64  | 14  | 1  | 99  | 81  | 36  |
| 153 | 118 | 47  | 11 | 149 | 92  | 143 |
| 46  | 20  | 13  | 3  | 93  | 108 | 137 |
| 179 | 178 | 39  | 32 | 47  | 50  | 143 |
| 67  | 161 | 7   | 6  | 62  | 38  | 36  |
| 222 | 79  | 47  | 29 | 49  | 78  | 122 |
| 153 | 89  | 32  | 16 | 73  | 51  | 135 |
| 150 | 134 | 32  | 28 | 32  | 48  | 159 |
| 19  | 35  | 2   | 0  | 24  | 4   | 11  |
| 143 | 165 | 24  | 38 | 113 | 53  | 87  |
| 122 | 74  | 46  | 39 | 91  | 74  | 122 |
| 54  | 186 | 18  | 1  | 93  | 20  | 52  |
| 61  | 359 | 2   | 6  | 248 | 44  | 69  |
| 139 | 72  | 43  | 25 | 48  | 81  | 166 |
| 152 | 113 | 22  | 1  | 116 | 68  | 95  |
| 57  | 107 | 81  | 77 | 31  | 50  | 22  |
| 37  | 32  | 7   | 1  | 79  | 15  | 79  |
| 79  | 107 | 12  | 5  | 43  | 31  | 125 |
| 142 | 78  | 22  | 40 | 207 | 90  | 137 |
| 80  | 410 | 5   | 18 | 50  | 30  | 85  |
| 217 | 89  | 65  | 6  | 67  | 71  | 54  |
| 76  | 101 | 60  | 4  | 110 | 38  | 79  |
| 36  | 165 | 26  | 1  | 128 | 31  | 69  |
| 115 | 127 | 31  | 87 | 45  | 114 | 57  |
| 188 | 64  | 13  | 7  | 28  | 67  | 48  |
| 98  | 65  | 33  | 4  | 72  | 42  | 90  |
| 55  | 140 | 12  | 14 | 59  | 39  | 78  |
| 180 | 37  | 28  | 33 | 42  | 57  | 29  |
| 89  | 67  | 41  | 9  | 63  | 0   | 76  |
| 21  | 93  | 8   | 0  | 69  | 16  | 66  |
| 183 | 26  | 4   | 28 | 16  | 60  | 25  |
| 23  | 78  | 31  | 1  | 120 | 17  | 115 |
| 179 | 40  | 37  | 8  | 30  | 47  | 84  |
| 55  | 36  | 24  | 34 | 53  | 49  | 64  |
| 21  | 90  | 8   | 0  | 67  | 14  | 62  |
| 91  | 41  | 5   | 9  | 27  | 51  | 13  |
| 76  | 102 | 19  | 17 | 67  | 45  | 134 |
| 82  | 62  | 21  | 2  | 88  | 24  | 29  |
| 520 | 1   | 22  | 2  | 9   | 7   | 130 |
| 7   | 98  | 24  | 0  | 55  | 11  | 45  |
| 81  | 107 | 18  | 0  | 64  | 35  | 71  |
| 112 | 83  | 97  | 7  | 69  | 66  | 109 |
| 161 | 23  | 25  | 4  | 33  | 17  | 42  |
| 83  | 21  | 17  | 10 | 63  | 60  | 39  |

|     |     |    |    |     |    |     |
|-----|-----|----|----|-----|----|-----|
| 9   | 77  | 6  | 0  | 62  | 14 | 25  |
| 87  | 83  | 25 | 10 | 18  | 29 | 119 |
| 93  | 129 | 6  | 20 | 40  | 34 | 57  |
| 57  | 48  | 10 | 9  | 91  | 45 | 55  |
| 53  | 15  | 62 | 26 | 109 | 66 | 22  |
| 87  | 120 | 70 | 2  | 49  | 38 | 63  |
| 54  | 18  | 37 | 22 | 53  | 35 | 31  |
| 108 | 129 | 27 | 9  | 39  | 49 | 62  |
| 27  | 78  | 1  | 0  | 24  | 6  | 41  |
| 144 | 12  | 3  | 21 | 53  | 59 | 26  |
| 32  | 42  | 14 | 22 | 36  | 29 | 56  |
| 65  | 68  | 36 | 0  | 52  | 33 | 85  |
| 124 | 62  | 19 | 4  | 42  | 35 | 77  |
| 46  | 22  | 21 | 14 | 16  | 21 | 56  |
| 81  | 33  | 28 | 14 | 95  | 51 | 48  |
| 59  | 62  | 52 | 7  | 88  | 32 | 61  |
| 18  | 19  | 11 | 0  | 60  | 10 | 13  |
| 73  | 47  | 9  | 21 | 20  | 26 | 49  |
| 53  | 75  | 12 | 6  | 42  | 31 | 85  |
| 43  | 32  | 42 | 21 | 73  | 32 | 37  |
| 56  | 76  | 9  | 3  | 97  | 34 | 48  |
| 25  | 93  | 15 | 0  | 63  | 29 | 19  |
| 1   | 1   | 0  | 0  | 5   | 0  | 7   |
| 39  | 59  | 5  | 1  | 40  | 12 | 28  |
| 3   | 9   | 3  | 0  | 9   | 11 | 6   |
| 62  | 47  | 14 | 15 | 18  | 20 | 83  |
| 39  | 23  | 2  | 2  | 68  | 20 | 33  |
| 19  | 69  | 7  | 16 | 14  | 14 | 48  |
| 49  | 8   | 11 | 0  | 46  | 21 | 21  |
| 47  | 20  | 21 | 10 | 28  | 37 | 26  |
| 45  | 12  | 11 | 19 | 24  | 33 | 24  |
| 49  | 22  | 13 | 6  | 12  | 16 | 130 |
| 64  | 33  | 15 | 8  | 39  | 20 | 31  |
| 32  | 49  | 3  | 4  | 36  | 10 | 28  |
| 14  | 45  | 5  | 2  | 37  | 16 | 26  |
| 34  | 30  | 27 | 7  | 27  | 32 | 29  |
| 5   | 19  | 0  | 0  | 17  | 1  | 6   |
| 65  | 32  | 10 | 15 | 22  | 16 | 36  |
| 27  | 26  | 3  | 1  | 54  | 8  | 47  |
| 45  | 8   | 3  | 13 | 8   | 17 | 44  |
| 51  | 17  | 4  | 14 | 31  | 16 | 19  |
| 8   | 116 | 1  | 0  | 47  | 6  | 9   |
| 10  | 51  | 6  | 1  | 52  | 11 | 18  |
| 26  | 31  | 13 | 7  | 37  | 24 | 55  |
| 56  | 18  | 4  | 6  | 17  | 17 | 7   |
| 15  | 47  | 1  | 4  | 35  | 9  | 26  |
| 5   | 33  | 0  | 1  | 27  | 5  | 10  |
| 24  | 59  | 5  | 2  | 101 | 17 | 41  |
| 24  | 59  | 5  | 2  | 101 | 17 | 41  |
| 59  | 7   | 4  | 9  | 10  | 13 | 12  |
| 32  | 26  | 15 | 11 | 26  | 25 | 32  |
| 21  | 26  | 2  | 5  | 35  | 11 | 16  |
| 41  | 12  | 8  | 2  | 37  | 23 | 12  |
| 17  | 19  | 10 | 0  | 59  | 15 | 31  |
| 42  | 57  | 8  | 7  | 35  | 10 | 45  |
| 21  | 96  | 0  | 6  | 24  | 6  | 20  |
| 17  | 23  | 8  | 0  | 28  | 3  | 19  |
| 26  | 11  | 3  | 9  | 27  | 17 | 18  |
| 12  | 26  | 18 | 1  | 64  | 15 | 39  |

|    |     |    |    |    |    |    |
|----|-----|----|----|----|----|----|
| 61 | 83  | 16 | 0  | 81 | 14 | 7  |
| 19 | 16  | 7  | 2  | 18 | 24 | 41 |
| 23 | 39  | 2  | 3  | 30 | 8  | 18 |
| 2  | 5   | 0  | 1  | 4  | 0  | 1  |
| 36 | 25  | 7  | 1  | 17 | 10 | 38 |
| 12 | 27  | 6  | 1  | 55 | 5  | 29 |
| 22 | 6   | 16 | 12 | 25 | 33 | 14 |
| 39 | 19  | 10 | 10 | 11 | 12 | 36 |
| 9  | 27  | 4  | 1  | 52 | 5  | 28 |
| 61 | 28  | 17 | 4  | 14 | 6  | 32 |
| 44 | 6   | 2  | 6  | 24 | 17 | 27 |
| 14 | 19  | 6  | 1  | 17 | 6  | 17 |
| 23 | 30  | 2  | 6  | 9  | 9  | 35 |
| 2  | 3   | 2  | 0  | 0  | 0  | 0  |
| 20 | 2   | 12 | 25 | 12 | 21 | 7  |
| 25 | 9   | 8  | 12 | 14 | 14 | 29 |
| 44 | 6   | 2  | 4  | 6  | 9  | 27 |
| 40 | 7   | 1  | 3  | 14 | 19 | 12 |
| 16 | 33  | 7  | 0  | 31 | 8  | 22 |
| 2  | 10  | 0  | 0  | 1  | 0  | 3  |
| 23 | 16  | 6  | 2  | 20 | 3  | 19 |
| 10 | 56  | 7  | 0  | 16 | 4  | 26 |
| 1  | 159 | 0  | 0  | 0  | 0  | 0  |
| 14 | 9   | 9  | 11 | 14 | 11 | 10 |
| 14 | 24  | 4  | 2  | 13 | 5  | 10 |
| 24 | 16  | 5  | 10 | 23 | 5  | 13 |
| 33 | 4   | 5  | 8  | 8  | 24 | 7  |
| 38 | 14  | 11 | 0  | 13 | 17 | 14 |
| 18 | 6   | 3  | 2  | 9  | 15 | 3  |
| 38 | 23  | 3  | 4  | 16 | 14 | 19 |
| 36 | 13  | 10 | 7  | 16 | 30 | 22 |
| 36 | 17  | 24 | 8  | 13 | 22 | 16 |
| 10 | 50  | 7  | 0  | 15 | 4  | 24 |
| 17 | 9   | 6  | 0  | 12 | 8  | 5  |
| 3  | 12  | 0  | 0  | 6  | 2  | 11 |
| 2  | 23  | 3  | 0  | 18 | 6  | 17 |
| 16 | 9   | 12 | 0  | 21 | 9  | 3  |
| 26 | 36  | 6  | 4  | 11 | 11 | 20 |
| 16 | 50  | 0  | 3  | 12 | 6  | 10 |
| 7  | 6   | 6  | 3  | 6  | 20 | 32 |
| 24 | 2   | 9  | 8  | 10 | 11 | 10 |
| 2  | 23  | 7  | 0  | 16 | 7  | 18 |
| 34 | 10  | 10 | 0  | 6  | 6  | 10 |
| 11 | 13  | 4  | 16 | 13 | 6  | 10 |
| 15 | 11  | 1  | 5  | 12 | 11 | 14 |
| 5  | 3   | 4  | 0  | 11 | 1  | 11 |
| 22 | 2   | 3  | 2  | 11 | 16 | 7  |
| 21 | 4   | 8  | 2  | 19 | 11 | 21 |
| 30 | 3   | 15 | 11 | 8  | 17 | 16 |
| 31 | 14  | 7  | 4  | 1  | 7  | 18 |
| 19 | 9   | 8  | 0  | 11 | 11 | 13 |
| 9  | 10  | 9  | 5  | 10 | 9  | 18 |
| 21 | 3   | 26 | 7  | 11 | 12 | 16 |
| 17 | 7   | 7  | 10 | 7  | 9  | 14 |
| 19 | 7   | 3  | 4  | 13 | 10 | 9  |
| 15 | 17  | 1  | 1  | 16 | 10 | 14 |
| 8  | 10  | 6  | 2  | 8  | 9  | 13 |
| 5  | 14  | 5  | 0  | 10 | 3  | 5  |
| 1  | 10  | 1  | 0  | 18 | 2  | 7  |



|    |    |   |    |    |    |    |
|----|----|---|----|----|----|----|
| 9  | 19 | 1 | 0  | 9  | 5  | 10 |
| 10 | 8  | 3 | 0  | 13 | 4  | 10 |
| 17 | 19 | 8 | 8  | 3  | 8  | 9  |
| 18 | 13 | 3 | 1  | 6  | 14 | 11 |
| 21 | 8  | 4 | 3  | 12 | 7  | 12 |
| 16 | 7  | 4 | 1  | 14 | 11 | 18 |
| 21 | 18 | 9 | 3  | 12 | 15 | 8  |
| 5  | 15 | 2 | 1  | 15 | 6  | 2  |
| 11 | 4  | 2 | 1  | 8  | 7  | 6  |
| 21 | 5  | 2 | 5  | 13 | 10 | 6  |
| 11 | 10 | 4 | 4  | 9  | 9  | 14 |
| 20 | 10 | 2 | 0  | 25 | 7  | 6  |
| 23 | 50 | 0 | 2  | 7  | 5  | 16 |
| 15 | 5  | 6 | 3  | 5  | 7  | 13 |
| 6  | 11 | 1 | 0  | 4  | 4  | 12 |
| 14 | 16 | 2 | 12 | 9  | 3  | 9  |
| 15 | 9  | 3 | 1  | 16 | 6  | 3  |
| 15 | 2  | 7 | 10 | 10 | 5  | 20 |
| 3  | 10 | 0 | 0  | 8  | 1  | 1  |
| 10 | 14 | 3 | 3  | 9  | 8  | 13 |
| 2  | 11 | 1 | 0  | 22 | 1  | 11 |
| 17 | 11 | 2 | 2  | 14 | 3  | 9  |
| 4  | 6  | 1 | 0  | 10 | 9  | 8  |
| 17 | 7  | 6 | 2  | 7  | 11 | 17 |
| 2  | 2  | 0 | 1  | 5  | 0  | 2  |
| 13 | 5  | 4 | 2  | 8  | 9  | 10 |
| 19 | 5  | 2 | 1  | 6  | 5  | 7  |
| 16 | 5  | 7 | 1  | 13 | 9  | 9  |
| 5  | 2  | 7 | 0  | 8  | 3  | 9  |
| 15 | 10 | 3 | 1  | 5  | 7  | 16 |
| 11 | 16 | 8 | 4  | 10 | 17 | 18 |
| 16 | 5  | 3 | 1  | 18 | 0  | 14 |
| 12 | 8  | 1 | 3  | 6  | 4  | 14 |
| 5  | 9  | 0 | 0  | 6  | 1  | 2  |
| 10 | 10 | 0 | 0  | 11 | 3  | 7  |
| 19 | 7  | 2 | 0  | 15 | 8  | 9  |
| 19 | 18 | 5 | 3  | 9  | 5  | 15 |
| 3  | 6  | 2 | 4  | 13 | 7  | 12 |
| 5  | 1  | 8 | 0  | 4  | 7  | 2  |
| 1  | 12 | 0 | 0  | 2  | 2  | 0  |
| 9  | 3  | 2 | 4  | 24 | 5  | 9  |
| 7  | 10 | 1 | 0  | 3  | 0  | 7  |
| 8  | 14 | 1 | 0  | 10 | 3  | 9  |
| 13 | 6  | 3 | 3  | 7  | 4  | 10 |
| 6  | 12 | 1 | 0  | 13 | 1  | 4  |
| 12 | 13 | 0 | 3  | 12 | 1  | 4  |
| 1  | 9  | 3 | 0  | 10 | 5  | 3  |
| 9  | 29 | 4 | 0  | 10 | 2  | 11 |
| 10 | 5  | 1 | 0  | 10 | 7  | 4  |
| 14 | 9  | 4 | 2  | 5  | 6  | 4  |
| 14 | 6  | 0 | 3  | 6  | 5  | 7  |
| 14 | 8  | 1 | 0  | 4  | 6  | 6  |
| 0  | 3  | 0 | 0  | 8  | 1  | 7  |
| 1  | 17 | 0 | 2  | 7  | 2  | 3  |
| 12 | 11 | 5 | 0  | 6  | 1  | 9  |
| 5  | 6  | 0 | 0  | 15 | 7  | 12 |
| 5  | 18 | 1 | 5  | 5  | 5  | 3  |
| 9  | 4  | 1 | 0  | 6  | 5  | 4  |
| 4  | 6  | 0 | 1  | 18 | 5  | 2  |

|    |    |    |   |    |    |    |
|----|----|----|---|----|----|----|
| 4  | 9  | 8  | 2 | 2  | 6  | 5  |
| 1  | 3  | 1  | 0 | 5  | 2  | 2  |
| 17 | 3  | 1  | 1 | 3  | 5  | 3  |
| 3  | 1  | 4  | 0 | 5  | 1  | 7  |
| 6  | 2  | 0  | 4 | 1  | 1  | 2  |
| 8  | 5  | 7  | 2 | 3  | 7  | 2  |
| 9  | 6  | 3  | 0 | 5  | 3  | 9  |
| 1  | 1  | 14 | 3 | 11 | 3  | 0  |
| 2  | 3  | 0  | 0 | 8  | 5  | 0  |
| 4  | 3  | 0  | 0 | 4  | 6  | 4  |
| 8  | 3  | 1  | 0 | 8  | 2  | 6  |
| 2  | 3  | 1  | 1 | 5  | 2  | 6  |
| 8  | 11 | 1  | 2 | 4  | 2  | 6  |
| 8  | 4  | 1  | 0 | 14 | 6  | 8  |
| 14 | 6  | 7  | 1 | 0  | 5  | 5  |
| 1  | 7  | 2  | 0 | 7  | 2  | 26 |
| 2  | 0  | 0  | 0 | 3  | 3  | 7  |
| 10 | 7  | 2  | 4 | 2  | 4  | 7  |
| 9  | 3  | 0  | 0 | 7  | 6  | 2  |
| 0  | 8  | 1  | 1 | 6  | 1  | 3  |
| 1  | 4  | 0  | 1 | 10 | 2  | 8  |
| 4  | 4  | 3  | 0 | 12 | 5  | 7  |
| 1  | 2  | 2  | 0 | 3  | 2  | 3  |
| 2  | 7  | 0  | 1 | 7  | 5  | 2  |
| 6  | 8  | 0  | 1 | 6  | 3  | 5  |
| 0  | 13 | 1  | 0 | 6  | 15 | 5  |
| 1  | 9  | 1  | 0 | 5  | 0  | 4  |
| 8  | 8  | 0  | 2 | 11 | 6  | 3  |
| 2  | 1  | 5  | 0 | 6  | 1  | 7  |
| 1  | 1  | 4  | 0 | 5  | 1  | 8  |
| 5  | 3  | 1  | 3 | 6  | 3  | 1  |
| 10 | 0  | 1  | 0 | 1  | 0  | 6  |
| 7  | 5  | 0  | 2 | 3  | 5  | 7  |
| 2  | 5  | 0  | 1 | 11 | 3  | 2  |
| 3  | 3  | 2  | 3 | 5  | 3  | 8  |
| 2  | 4  | 2  | 0 | 61 | 4  | 6  |
| 0  | 12 | 1  | 0 | 1  | 0  | 1  |
| 0  | 2  | 0  | 0 | 1  | 0  | 0  |
| 0  | 2  | 0  | 0 | 0  | 0  | 1  |
| 0  | 1  | 1  | 0 | 7  | 0  | 3  |
| 8  | 6  | 5  | 1 | 4  | 3  | 3  |
| 9  | 1  | 3  | 1 | 9  | 8  | 7  |
| 7  | 4  | 0  | 1 | 1  | 1  | 9  |
| 10 | 4  | 3  | 0 | 0  | 5  | 4  |
| 0  | 0  | 0  | 0 | 1  | 0  | 1  |
| 9  | 5  | 0  | 0 | 5  | 1  | 0  |
| 6  | 2  | 0  | 0 | 2  | 1  | 1  |
| 1  | 6  | 0  | 0 | 8  | 0  | 3  |
| 6  | 8  | 2  | 0 | 1  | 1  | 5  |
| 4  | 1  | 1  | 1 | 2  | 4  | 1  |
| 0  | 3  | 2  | 0 | 1  | 1  | 6  |
| 0  | 2  | 0  | 0 | 0  | 1  | 0  |
| 9  | 2  | 0  | 2 | 4  | 4  | 2  |
| 0  | 10 | 1  | 0 | 2  | 1  | 4  |
| 9  | 3  | 1  | 0 | 3  | 3  | 4  |
| 7  | 6  | 3  | 1 | 9  | 1  | 4  |
| 0  | 0  | 0  | 0 | 3  | 0  | 2  |
| 6  | 5  | 1  | 0 | 5  | 2  | 5  |
| 2  | 5  | 2  | 1 | 2  | 3  | 6  |

|   |    |   |   |   |   |    |
|---|----|---|---|---|---|----|
| 2 | 0  | 3 | 2 | 2 | 2 | 3  |
| 2 | 3  | 1 | 0 | 3 | 0 | 2  |
| 6 | 6  | 3 | 1 | 5 | 1 | 4  |
| 5 | 0  | 2 | 2 | 5 | 7 | 3  |
| 8 | 5  | 0 | 1 | 0 | 4 | 9  |
| 6 | 1  | 1 | 0 | 6 | 1 | 8  |
| 7 | 1  | 1 | 0 | 1 | 5 | 0  |
| 0 | 1  | 0 | 0 | 0 | 0 | 0  |
| 4 | 4  | 1 | 0 | 7 | 2 | 6  |
| 7 | 4  | 2 | 0 | 1 | 1 | 7  |
| 3 | 3  | 0 | 0 | 4 | 2 | 6  |
| 1 | 12 | 2 | 0 | 2 | 2 | 6  |
| 1 | 2  | 0 | 0 | 7 | 3 | 0  |
| 1 | 3  | 0 | 0 | 2 | 0 | 2  |
| 6 | 4  | 0 | 2 | 1 | 1 | 3  |
| 4 | 9  | 1 | 5 | 2 | 3 | 2  |
| 7 | 0  | 0 | 1 | 1 | 2 | 0  |
| 3 | 0  | 2 | 0 | 5 | 2 | 1  |
| 0 | 0  | 1 | 0 | 5 | 2 | 2  |
| 5 | 1  | 2 | 0 | 1 | 1 | 4  |
| 2 | 12 | 0 | 1 | 3 | 1 | 5  |
| 5 | 2  | 1 | 0 | 4 | 2 | 5  |
| 4 | 4  | 0 | 0 | 7 | 1 | 2  |
| 2 | 5  | 0 | 0 | 6 | 1 | 3  |
| 3 | 3  | 1 | 2 | 0 | 3 | 5  |
| 6 | 2  | 1 | 3 | 3 | 2 | 11 |
| 4 | 2  | 0 | 0 | 3 | 4 | 5  |
| 9 | 2  | 0 | 1 | 0 | 5 | 2  |
| 2 | 4  | 2 | 0 | 2 | 4 | 1  |
| 3 | 8  | 2 | 2 | 1 | 2 | 1  |
| 3 | 4  | 0 | 0 | 4 | 4 | 2  |
| 0 | 3  | 0 | 1 | 1 | 0 | 0  |
| 8 | 2  | 0 | 1 | 1 | 1 | 2  |
| 0 | 1  | 1 | 1 | 1 | 0 | 2  |
| 2 | 4  | 2 | 1 | 1 | 3 | 2  |
| 0 | 0  | 0 | 0 | 5 | 2 | 0  |
| 0 | 0  | 1 | 0 | 1 | 0 | 4  |
| 2 | 2  | 4 | 1 | 2 | 0 | 8  |
| 1 | 6  | 0 | 0 | 4 | 0 | 1  |
| 1 | 0  | 1 | 2 | 2 | 3 | 1  |
| 1 | 0  | 1 | 0 | 1 | 0 | 4  |
| 2 | 5  | 0 | 0 | 4 | 2 | 1  |
| 4 | 2  | 1 | 0 | 5 | 4 | 2  |
| 1 | 0  | 0 | 0 | 2 | 0 | 1  |
| 0 | 0  | 1 | 0 | 0 | 0 | 1  |
| 0 | 3  | 1 | 2 | 6 | 2 | 3  |
| 2 | 2  | 1 | 0 | 2 | 1 | 3  |
| 0 | 1  | 0 | 0 | 1 | 0 | 0  |
| 0 | 4  | 2 | 0 | 2 | 0 | 1  |
| 2 | 3  | 1 | 0 | 4 | 1 | 3  |
| 0 | 1  | 2 | 3 | 3 | 1 | 1  |
| 2 | 3  | 2 | 0 | 4 | 0 | 3  |
| 1 | 2  | 5 | 1 | 3 | 3 | 4  |
| 3 | 1  | 1 | 1 | 2 | 2 | 5  |
| 0 | 2  | 0 | 0 | 0 | 0 | 1  |
| 1 | 1  | 0 | 0 | 0 | 0 | 0  |
| 2 | 0  | 0 | 0 | 2 | 0 | 2  |
| 2 | 4  | 3 | 0 | 2 | 0 | 0  |
| 2 | 2  | 1 | 0 | 0 | 2 | 2  |

|   |    |   |   |   |   |   |
|---|----|---|---|---|---|---|
| 7 | 1  | 0 | 0 | 1 | 0 | 6 |
| 7 | 2  | 0 | 0 | 2 | 0 | 3 |
| 2 | 4  | 0 | 0 | 2 | 0 | 0 |
| 4 | 3  | 1 | 7 | 0 | 2 | 0 |
| 1 | 3  | 1 | 0 | 3 | 2 | 0 |
| 0 | 2  | 0 | 0 | 4 | 1 | 0 |
| 0 | 0  | 4 | 0 | 0 | 2 | 1 |
| 1 | 5  | 0 | 0 | 0 | 0 | 0 |
| 7 | 1  | 1 | 0 | 0 | 0 | 3 |
| 1 | 0  | 1 | 0 | 6 | 3 | 0 |
| 5 | 0  | 3 | 1 | 2 | 2 | 2 |
| 2 | 4  | 2 | 1 | 1 | 3 | 2 |
| 2 | 0  | 1 | 0 | 1 | 1 | 2 |
| 3 | 0  | 4 | 1 | 1 | 0 | 1 |
| 3 | 0  | 0 | 0 | 0 | 0 | 1 |
| 0 | 1  | 0 | 0 | 0 | 0 | 2 |
| 4 | 5  | 1 | 0 | 0 | 0 | 2 |
| 4 | 3  | 2 | 0 | 1 | 0 | 3 |
| 0 | 1  | 0 | 0 | 1 | 0 | 1 |
| 1 | 3  | 0 | 0 | 1 | 0 | 2 |
| 0 | 4  | 0 | 0 | 0 | 0 | 5 |
| 1 | 2  | 1 | 0 | 0 | 0 | 4 |
| 1 | 1  | 1 | 0 | 1 | 0 | 1 |
| 2 | 9  | 4 | 0 | 0 | 3 | 2 |
| 1 | 5  | 2 | 2 | 3 | 0 | 1 |
| 0 | 1  | 1 | 1 | 0 | 1 | 1 |
| 1 | 3  | 0 | 0 | 2 | 1 | 1 |
| 0 | 1  | 2 | 0 | 4 | 0 | 1 |
| 0 | 1  | 0 | 1 | 2 | 1 | 0 |
| 2 | 0  | 0 | 0 | 5 | 1 | 1 |
| 6 | 3  | 0 | 0 | 7 | 1 | 0 |
| 1 | 1  | 0 | 0 | 1 | 1 | 1 |
| 1 | 3  | 6 | 0 | 1 | 3 | 1 |
| 6 | 0  | 1 | 3 | 0 | 1 | 2 |
| 1 | 4  | 2 | 0 | 0 | 1 | 3 |
| 0 | 10 | 1 | 0 | 2 | 1 | 0 |
| 0 | 1  | 0 | 0 | 2 | 1 | 2 |
| 0 | 1  | 0 | 0 | 0 | 0 | 1 |

|      |      |      |      |      |      |      |
|------|------|------|------|------|------|------|
| 0.78 | 0.82 | 0.36 | 0.07 | 0.20 | 0.25 | 0.31 |
| 12   | 11   | 19   | 32   | 29   | 26   | 21   |
| 1    | 1    | 1    | 1    | 1    | 1    | 1    |

|         |         |        |        |         |         |         |
|---------|---------|--------|--------|---------|---------|---------|
| 43      | 44      | 45     | 46     | 47      | 48      | 49      |
| 16      | 17      | 18     | 19     | 20      | 21      | 22      |
| D_13    | D_14    | D_3    | D_9    | E_20    | E_29    | E_4     |
| CHR_NP  | CHR_NP  | CHR_NP | CHR_NP | CHR_NP  | CHR_NP  | CHR_NP  |
| 2758841 | 2173631 | 852941 | 239935 | 1893208 | 1240451 | 2304775 |
| CHR_NP  | CHR_NP  | CHR_NP | CHR_NP | CHR_NP  | CHR_NP  | CHR_NP  |
| 1230163 | 772506  | 380980 | 122679 | 389983  | 434200  | 899048  |
| 199880  | 185575  | 112586 | 4360   | 256917  | 87950   | 162314  |
| 229684  | 83193   | 98937  | 12343  | 135742  | 104686  | 168898  |
| 157501  | 74283   | 21941  | 2068   | 88459   | 83637   | 78820   |
| 246324  | 96288   | 60780  | 39570  | 121914  | 149724  | 164506  |

|       |        |       |      |        |       |        |
|-------|--------|-------|------|--------|-------|--------|
| 42920 | 105430 | 12798 | 1297 | 138924 | 19072 | 128682 |
| 86557 | 103298 | 17153 | 6148 | 189457 | 55740 | 89051  |
| 3400  | 36567  | 1632  | 453  | 18376  | 3407  | 35682  |
| 27028 | 56592  | 9145  | 1444 | 60543  | 20112 | 79855  |
| 37748 | 100568 | 10874 | 949  | 33423  | 16296 | 33869  |
| 35245 | 64172  | 3387  | 4340 | 14649  | 11862 | 19996  |
| 45989 | 21913  | 11262 | 2892 | 33311  | 26726 | 63887  |
| 25349 | 29263  | 2341  | 966  | 21311  | 11884 | 14690  |
| 31222 | 12564  | 6726  | 5265 | 10244  | 11251 | 23877  |
| 4748  | 17127  | 2018  | 146  | 12249  | 5069  | 11310  |
| 36283 | 14749  | 5776  | 4360 | 14452  | 19783 | 30744  |
| 4484  | 18325  | 1316  | 165  | 16723  | 3485  | 9674   |
| 15964 | 24721  | 4646  | 794  | 12614  | 9448  | 22251  |
| 10630 | 21944  | 3246  | 172  | 20440  | 4826  | 16228  |
| 19659 | 25876  | 7572  | 1368 | 15097  | 12160 | 9087   |
| 8759  | 13123  | 3804  | 832  | 10639  | 7806  | 8818   |
| 12074 | 15624  | 1878  | 295  | 6410   | 4200  | 9798   |
| 6338  | 30600  | 1503  | 89   | 11806  | 6426  | 5072   |
| 6183  | 13026  | 1523  | 74   | 30945  | 4146  | 12014  |
| 3848  | 4041   | 1720  | 181  | 12014  | 2145  | 3273   |
| 13498 | 11428  | 3012  | 491  | 10595  | 5810  | 12898  |
| 10138 | 4225   | 3424  | 3164 | 3971   | 6324  | 8727   |
| 2137  | 9154   | 844   | 225  | 4317   | 1897  | 9309   |
| 10180 | 5410   | 1580  | 306  | 11047  | 4712  | 9403   |
| 13760 | 10216  | 1876  | 1144 | 8071   | 6087  | 5189   |
| 4796  | 10179  | 3273  | 173  | 15625  | 5490  | 15629  |
| 7773  | 2541   | 1568  | 311  | 5170   | 5106  | 4727   |
| 2420  | 6848   | 432   | 211  | 8030   | 1759  | 4918   |
| 1060  | 13550  | 385   | 117  | 2224   | 1179  | 1443   |
| 9511  | 4939   | 1450  | 280  | 10370  | 4460  | 8887   |
| 9755  | 9678   | 1195  | 563  | 5536   | 3045  | 6668   |
| 5290  | 7562   | 2910  | 190  | 5926   | 3775  | 5773   |
| 6660  | 2609   | 1267  | 176  | 8080   | 1710  | 2449   |
| 9551  | 7122   | 3472  | 1015 | 3615   | 4264  | 3159   |
| 2286  | 837    | 6494  | 3700 | 3582   | 2940  | 2314   |
| 5644  | 5686   | 1881  | 2104 | 5684   | 4438  | 4198   |
| 6226  | 4133   | 2206  | 905  | 3620   | 3242  | 3567   |
| 6045  | 3709   | 913   | 840  | 4933   | 2476  | 5529   |
| 439   | 2491   | 342   | 29   | 1420   | 336   | 1352   |
| 3435  | 1792   | 1277  | 212  | 4902   | 2611  | 3671   |
| 4376  | 2161   | 1208  | 210  | 5572   | 3584  | 4328   |
| 5353  | 4293   | 505   | 243  | 4614   | 1861  | 2385   |
| 4920  | 3871   | 2530  | 744  | 1477   | 3362  | 4775   |
| 295   | 367    | 27    | 23   | 338    | 162   | 616    |
| 803   | 5082   | 435   | 51   | 3054   | 1345  | 1917   |
| 4985  | 1132   | 481   | 311  | 2097   | 2013  | 605    |
| 1978  | 5798   | 547   | 69   | 3858   | 1336  | 2036   |
| 3694  | 4232   | 836   | 855  | 1586   | 1244  | 2444   |
| 1468  | 3465   | 1250  | 17   | 2990   | 1379  | 1240   |
| 2379  | 3983   | 266   | 477  | 2996   | 1905  | 1145   |
| 150   | 1017   | 19    | 13   | 247    | 111   | 382    |
| 2561  | 2812   | 490   | 116  | 2901   | 835   | 2672   |
| 1562  | 1896   | 481   | 43   | 3742   | 2007  | 2472   |
| 1939  | 2073   | 756   | 81   | 1716   | 988   | 1041   |
| 4233  | 2077   | 1003  | 168  | 2103   | 660   | 2449   |
| 3305  | 1620   | 401   | 158  | 1268   | 1255  | 1628   |
| 1297  | 2676   | 615   | 137  | 1917   | 1288  | 1637   |
| 447   | 721    | 69    | 11   | 394    | 49    | 481    |
| 253   | 160    | 43    | 22   | 463    | 83    | 204    |

|      |      |     |     |      |      |      |
|------|------|-----|-----|------|------|------|
| 1463 | 1046 | 801 | 158 | 375  | 991  | 2321 |
| 892  | 1651 | 176 | 43  | 1159 | 357  | 1198 |
| 339  | 1657 | 115 | 19  | 962  | 450  | 1277 |
| 430  | 916  | 50  | 24  | 516  | 139  | 671  |
| 1412 | 2151 | 114 | 117 | 1805 | 550  | 1314 |
| 722  | 1093 | 162 | 33  | 1023 | 176  | 1219 |
| 2138 | 1361 | 662 | 276 | 1048 | 1071 | 1559 |
| 1020 | 540  | 450 | 210 | 379  | 532  | 1490 |
| 294  | 1046 | 112 | 5   | 501  | 159  | 354  |
| 563  | 1584 | 203 | 31  | 633  | 375  | 992  |
| 886  | 1147 | 155 | 15  | 3022 | 643  | 1094 |
| 1580 | 487  | 409 | 90  | 423  | 988  | 238  |
| 1295 | 1575 | 347 | 238 | 1196 | 593  | 967  |
| 1538 | 912  | 354 | 66  | 921  | 242  | 714  |
| 1692 | 668  | 606 | 257 | 446  | 743  | 867  |
| 1425 | 1187 | 228 | 33  | 616  | 697  | 859  |
| 706  | 521  | 80  | 22  | 1099 | 316  | 825  |
| 1520 | 847  | 319 | 228 | 646  | 794  | 1116 |
| 1322 | 780  | 341 | 67  | 526  | 571  | 923  |
| 296  | 6428 | 22  | 2   | 435  | 474  | 213  |
| 504  | 836  | 55  | 18  | 1648 | 250  | 272  |
| 1238 | 692  | 154 | 421 | 671  | 482  | 839  |
| 1672 | 666  | 660 | 389 | 477  | 668  | 1088 |
| 239  | 279  | 74  | 7   | 537  | 116  | 823  |
| 335  | 716  | 123 | 7   | 996  | 476  | 842  |
| 888  | 254  | 319 | 67  | 674  | 325  | 306  |
| 880  | 392  | 425 | 60  | 651  | 464  | 429  |
| 81   | 50   | 4   | 6   | 28   | 15   | 97   |
| 568  | 381  | 99  | 67  | 967  | 382  | 1112 |
| 549  | 466  | 63  | 2   | 572  | 212  | 1030 |
| 146  | 596  | 16  | 10  | 333  | 78   | 348  |
| 267  | 566  | 120 | 26  | 642  | 259  | 492  |
| 789  | 493  | 545 | 96  | 306  | 494  | 418  |
| 707  | 604  | 343 | 124 | 312  | 511  | 626  |
| 755  | 252  | 412 | 118 | 404  | 357  | 350  |
| 107  | 598  | 29  | 1   | 172  | 34   | 218  |
| 468  | 609  | 69  | 142 | 260  | 169  | 277  |
| 477  | 373  | 106 | 17  | 749  | 334  | 525  |
| 661  | 184  | 211 | 233 | 277  | 324  | 271  |
| 383  | 350  | 86  | 4   | 310  | 111  | 220  |
| 152  | 656  | 91  | 13  | 291  | 87   | 432  |
| 68   | 327  | 40  | 2   | 133  | 52   | 171  |
| 594  | 523  | 218 | 282 | 422  | 296  | 537  |
| 418  | 652  | 117 | 10  | 811  | 290  | 369  |
| 125  | 581  | 12  | 20  | 249  | 99   | 315  |
| 118  | 665  | 25  | 71  | 164  | 118  | 281  |
| 272  | 383  | 200 | 1   | 392  | 231  | 454  |
| 470  | 337  | 168 | 45  | 308  | 247  | 330  |
| 648  | 650  | 233 | 55  | 272  | 152  | 309  |
| 157  | 247  | 17  | 6   | 186  | 40   | 184  |
| 240  | 84   | 93  | 19  | 226  | 272  | 246  |
| 413  | 90   | 86  | 6   | 135  | 217  | 140  |
| 294  | 505  | 35  | 9   | 266  | 133  | 223  |
| 256  | 529  | 37  | 14  | 309  | 136  | 304  |
| 256  | 529  | 37  | 14  | 309  | 136  | 304  |
| 262  | 340  | 123 | 5   | 170  | 80   | 208  |
| 398  | 316  | 48  | 111 | 177  | 117  | 427  |
| 336  | 305  | 133 | 6   | 189  | 196  | 362  |
| 136  | 79   | 62  | 5   | 362  | 243  | 90   |

|     |     |     |     |     |     |     |
|-----|-----|-----|-----|-----|-----|-----|
| 125 | 405 | 113 | 3   | 240 | 186 | 249 |
| 50  | 124 | 14  | 3   | 65  | 22  | 42  |
| 350 | 230 | 95  | 29  | 123 | 171 | 309 |
| 417 | 130 | 48  | 125 | 250 | 83  | 120 |
| 326 | 175 | 127 | 12  | 206 | 172 | 274 |
| 382 | 144 | 127 | 59  | 208 | 105 | 158 |
| 353 | 174 | 116 | 40  | 184 | 145 | 171 |
| 162 | 39  | 14  | 34  | 106 | 38  | 88  |
| 174 | 255 | 153 | 13  | 190 | 122 | 208 |
| 351 | 151 | 25  | 0   | 269 | 78  | 164 |
| 156 | 319 | 42  | 118 | 201 | 99  | 162 |
| 65  | 165 | 11  | 27  | 208 | 75  | 92  |
| 300 | 302 | 57  | 16  | 207 | 108 | 122 |
| 155 | 161 | 23  | 16  | 157 | 66  | 182 |
| 134 | 242 | 21  | 26  | 78  | 83  | 308 |
| 193 | 112 | 19  | 0   | 208 | 77  | 173 |
| 391 | 119 | 28  | 30  | 185 | 88  | 212 |
| 225 | 137 | 35  | 34  | 195 | 145 | 141 |
| 144 | 200 | 28  | 5   | 197 | 84  | 256 |
| 111 | 29  | 147 | 82  | 81  | 79  | 157 |
| 179 | 198 | 17  | 12  | 236 | 91  | 135 |
| 23  | 75  | 6   | 1   | 14  | 2   | 24  |
| 174 | 81  | 40  | 18  | 38  | 66  | 214 |
| 143 | 178 | 31  | 8   | 125 | 119 | 176 |
| 101 | 112 | 44  | 1   | 347 | 125 | 212 |
| 203 | 200 | 31  | 11  | 99  | 37  | 154 |
| 112 | 142 | 24  | 68  | 87  | 70  | 155 |
| 85  | 117 | 86  | 7   | 109 | 37  | 68  |
| 58  | 101 | 3   | 2   | 76  | 32  | 86  |
| 61  | 64  | 14  | 1   | 99  | 81  | 36  |
| 153 | 118 | 47  | 11  | 149 | 92  | 143 |
| 46  | 20  | 13  | 3   | 93  | 108 | 137 |
| 179 | 178 | 39  | 32  | 47  | 50  | 143 |
| 67  | 161 | 7   | 6   | 62  | 38  | 36  |
| 222 | 79  | 47  | 29  | 49  | 78  | 122 |
| 153 | 89  | 32  | 16  | 73  | 51  | 135 |
| 150 | 134 | 32  | 28  | 32  | 48  | 159 |
| 19  | 35  | 2   | 0   | 24  | 4   | 11  |
| 143 | 165 | 24  | 38  | 113 | 53  | 87  |
| 122 | 74  | 46  | 39  | 91  | 74  | 122 |
| 54  | 186 | 18  | 1   | 93  | 20  | 52  |
| 61  | 359 | 2   | 6   | 248 | 44  | 69  |
| 139 | 72  | 43  | 25  | 48  | 81  | 166 |
| 152 | 113 | 22  | 1   | 116 | 68  | 95  |
| 57  | 107 | 81  | 77  | 31  | 50  | 22  |
| 37  | 32  | 7   | 1   | 79  | 15  | 79  |
| 79  | 107 | 12  | 5   | 43  | 31  | 125 |
| 142 | 78  | 22  | 40  | 207 | 90  | 137 |
| 80  | 410 | 5   | 18  | 50  | 30  | 85  |
| 217 | 89  | 65  | 6   | 67  | 71  | 54  |
| 76  | 101 | 60  | 4   | 110 | 38  | 79  |
| 36  | 165 | 26  | 1   | 128 | 31  | 69  |
| 115 | 127 | 31  | 87  | 45  | 114 | 57  |
| 188 | 64  | 13  | 7   | 28  | 67  | 48  |
| 98  | 65  | 33  | 4   | 72  | 42  | 90  |
| 55  | 140 | 12  | 14  | 59  | 39  | 78  |
| 180 | 37  | 28  | 33  | 42  | 57  | 29  |
| 89  | 67  | 41  | 9   | 63  | 0   | 76  |
| 21  | 93  | 8   | 0   | 69  | 16  | 66  |

|     |     |    |    |     |    |     |
|-----|-----|----|----|-----|----|-----|
| 183 | 26  | 4  | 28 | 16  | 60 | 25  |
| 23  | 78  | 31 | 1  | 120 | 17 | 115 |
| 179 | 40  | 37 | 8  | 30  | 47 | 84  |
| 55  | 36  | 24 | 34 | 53  | 49 | 64  |
| 21  | 90  | 8  | 0  | 67  | 14 | 62  |
| 91  | 41  | 5  | 9  | 27  | 51 | 13  |
| 76  | 102 | 19 | 17 | 67  | 45 | 134 |
| 82  | 62  | 21 | 2  | 88  | 24 | 29  |
| 520 | 1   | 22 | 2  | 9   | 7  | 130 |
| 7   | 98  | 24 | 0  | 55  | 11 | 45  |
| 81  | 107 | 18 | 0  | 64  | 35 | 71  |
| 112 | 83  | 97 | 7  | 69  | 66 | 109 |
| 161 | 23  | 25 | 4  | 33  | 17 | 42  |
| 83  | 21  | 17 | 10 | 63  | 60 | 39  |
| 9   | 77  | 6  | 0  | 62  | 14 | 25  |
| 87  | 83  | 25 | 10 | 18  | 29 | 119 |
| 93  | 129 | 6  | 20 | 40  | 34 | 57  |
| 57  | 48  | 10 | 9  | 91  | 45 | 55  |
| 53  | 15  | 62 | 26 | 109 | 66 | 22  |
| 87  | 120 | 70 | 2  | 49  | 38 | 63  |
| 54  | 18  | 37 | 22 | 53  | 35 | 31  |
| 108 | 129 | 27 | 9  | 39  | 49 | 62  |
| 27  | 78  | 1  | 0  | 24  | 6  | 41  |
| 144 | 12  | 3  | 21 | 53  | 59 | 26  |
| 32  | 42  | 14 | 22 | 36  | 29 | 56  |
| 65  | 68  | 36 | 0  | 52  | 33 | 85  |
| 124 | 62  | 19 | 4  | 42  | 35 | 77  |
| 46  | 22  | 21 | 14 | 16  | 21 | 56  |
| 81  | 33  | 28 | 14 | 95  | 51 | 48  |
| 59  | 62  | 52 | 7  | 88  | 32 | 61  |
| 18  | 19  | 11 | 0  | 60  | 10 | 13  |
| 73  | 47  | 9  | 21 | 20  | 26 | 49  |
| 53  | 75  | 12 | 6  | 42  | 31 | 85  |
| 43  | 32  | 42 | 21 | 73  | 32 | 37  |
| 56  | 76  | 9  | 3  | 97  | 34 | 48  |
| 25  | 93  | 15 | 0  | 63  | 29 | 19  |
| 1   | 1   | 0  | 0  | 5   | 0  | 7   |
| 39  | 59  | 5  | 1  | 40  | 12 | 28  |
| 3   | 9   | 3  | 0  | 9   | 11 | 6   |
| 62  | 47  | 14 | 15 | 18  | 20 | 83  |
| 39  | 23  | 2  | 2  | 68  | 20 | 33  |
| 19  | 69  | 7  | 16 | 14  | 14 | 48  |
| 49  | 8   | 11 | 0  | 46  | 21 | 21  |
| 47  | 20  | 21 | 10 | 28  | 37 | 26  |
| 45  | 12  | 11 | 19 | 24  | 33 | 24  |
| 49  | 22  | 13 | 6  | 12  | 16 | 130 |
| 64  | 33  | 15 | 8  | 39  | 20 | 31  |
| 32  | 49  | 3  | 4  | 36  | 10 | 28  |
| 14  | 45  | 5  | 2  | 37  | 16 | 26  |
| 34  | 30  | 27 | 7  | 27  | 32 | 29  |
| 5   | 19  | 0  | 0  | 17  | 1  | 6   |
| 65  | 32  | 10 | 15 | 22  | 16 | 36  |
| 27  | 26  | 3  | 1  | 54  | 8  | 47  |
| 45  | 8   | 3  | 13 | 8   | 17 | 44  |
| 51  | 17  | 4  | 14 | 31  | 16 | 19  |
| 8   | 116 | 1  | 0  | 47  | 6  | 9   |
| 10  | 51  | 6  | 1  | 52  | 11 | 18  |
| 26  | 31  | 13 | 7  | 37  | 24 | 55  |
| 56  | 18  | 4  | 6  | 17  | 17 | 7   |



|    |     |    |    |     |    |    |
|----|-----|----|----|-----|----|----|
| 15 | 47  | 1  | 4  | 35  | 9  | 26 |
| 5  | 33  | 0  | 1  | 27  | 5  | 10 |
| 24 | 59  | 5  | 2  | 101 | 17 | 41 |
| 24 | 59  | 5  | 2  | 101 | 17 | 41 |
| 59 | 7   | 4  | 9  | 10  | 13 | 12 |
| 32 | 26  | 15 | 11 | 26  | 25 | 32 |
| 21 | 26  | 2  | 5  | 35  | 11 | 16 |
| 41 | 12  | 8  | 2  | 37  | 23 | 12 |
| 17 | 19  | 10 | 0  | 59  | 15 | 31 |
| 42 | 57  | 8  | 7  | 35  | 10 | 45 |
| 21 | 96  | 0  | 6  | 24  | 6  | 20 |
| 17 | 23  | 8  | 0  | 28  | 3  | 19 |
| 26 | 11  | 3  | 9  | 27  | 17 | 18 |
| 12 | 26  | 18 | 1  | 64  | 15 | 39 |
| 61 | 83  | 16 | 0  | 81  | 14 | 7  |
| 19 | 16  | 7  | 2  | 18  | 24 | 41 |
| 23 | 39  | 2  | 3  | 30  | 8  | 18 |
| 2  | 5   | 0  | 1  | 4   | 0  | 1  |
| 36 | 25  | 7  | 1  | 17  | 10 | 38 |
| 12 | 27  | 6  | 1  | 55  | 5  | 29 |
| 22 | 6   | 16 | 12 | 25  | 33 | 14 |
| 39 | 19  | 10 | 10 | 11  | 12 | 36 |
| 9  | 27  | 4  | 1  | 52  | 5  | 28 |
| 61 | 28  | 17 | 4  | 14  | 6  | 32 |
| 44 | 6   | 2  | 6  | 24  | 17 | 27 |
| 14 | 19  | 6  | 1  | 17  | 6  | 17 |
| 23 | 30  | 2  | 6  | 9   | 9  | 35 |
| 2  | 3   | 2  | 0  | 0   | 0  | 0  |
| 20 | 2   | 12 | 25 | 12  | 21 | 7  |
| 25 | 9   | 8  | 12 | 14  | 14 | 29 |
| 44 | 6   | 2  | 4  | 6   | 9  | 27 |
| 40 | 7   | 1  | 3  | 14  | 19 | 12 |
| 16 | 33  | 7  | 0  | 31  | 8  | 22 |
| 2  | 10  | 0  | 0  | 1   | 0  | 3  |
| 23 | 16  | 6  | 2  | 20  | 3  | 19 |
| 10 | 56  | 7  | 0  | 16  | 4  | 26 |
| 1  | 159 | 0  | 0  | 0   | 0  | 0  |
| 14 | 9   | 9  | 11 | 14  | 11 | 10 |
| 14 | 24  | 4  | 2  | 13  | 5  | 10 |
| 24 | 16  | 5  | 10 | 23  | 5  | 13 |
| 33 | 4   | 5  | 8  | 8   | 24 | 7  |
| 38 | 14  | 11 | 0  | 13  | 17 | 14 |
| 18 | 6   | 3  | 2  | 9   | 15 | 3  |
| 38 | 23  | 3  | 4  | 16  | 14 | 19 |
| 36 | 13  | 10 | 7  | 16  | 30 | 22 |
| 36 | 17  | 24 | 8  | 13  | 22 | 16 |
| 10 | 50  | 7  | 0  | 15  | 4  | 24 |
| 17 | 9   | 6  | 0  | 12  | 8  | 5  |
| 3  | 12  | 0  | 0  | 6   | 2  | 11 |
| 2  | 23  | 3  | 0  | 18  | 6  | 17 |
| 16 | 9   | 12 | 0  | 21  | 9  | 3  |
| 26 | 36  | 6  | 4  | 11  | 11 | 20 |
| 16 | 50  | 0  | 3  | 12  | 6  | 10 |
| 7  | 6   | 6  | 3  | 6   | 20 | 32 |
| 24 | 2   | 9  | 8  | 10  | 11 | 10 |
| 2  | 23  | 7  | 0  | 16  | 7  | 18 |
| 34 | 10  | 10 | 0  | 6   | 6  | 10 |
| 11 | 13  | 4  | 16 | 13  | 6  | 10 |
| 15 | 11  | 1  | 5  | 12  | 11 | 14 |

|    |    |    |    |    |    |    |
|----|----|----|----|----|----|----|
| 5  | 3  | 4  | 0  | 11 | 1  | 11 |
| 22 | 2  | 3  | 2  | 11 | 16 | 7  |
| 21 | 4  | 8  | 2  | 19 | 11 | 21 |
| 30 | 3  | 15 | 11 | 8  | 17 | 16 |
| 31 | 14 | 7  | 4  | 1  | 7  | 18 |
| 19 | 9  | 8  | 0  | 11 | 11 | 13 |
| 9  | 10 | 9  | 5  | 10 | 9  | 18 |
| 21 | 3  | 26 | 7  | 11 | 12 | 16 |
| 17 | 7  | 7  | 10 | 7  | 9  | 14 |
| 19 | 7  | 3  | 4  | 13 | 10 | 9  |
| 15 | 17 | 1  | 1  | 16 | 10 | 14 |
| 8  | 10 | 6  | 2  | 8  | 9  | 13 |
| 5  | 14 | 5  | 0  | 10 | 3  | 5  |
| 1  | 10 | 1  | 0  | 18 | 2  | 7  |
| 9  | 19 | 1  | 0  | 9  | 5  | 10 |
| 10 | 8  | 3  | 0  | 13 | 4  | 10 |
| 17 | 19 | 8  | 8  | 3  | 8  | 9  |
| 18 | 13 | 3  | 1  | 6  | 14 | 11 |
| 21 | 8  | 4  | 3  | 12 | 7  | 12 |
| 16 | 7  | 4  | 1  | 14 | 11 | 18 |
| 21 | 18 | 9  | 3  | 12 | 15 | 8  |
| 5  | 15 | 2  | 1  | 15 | 6  | 2  |
| 11 | 4  | 2  | 1  | 8  | 7  | 6  |
| 21 | 5  | 2  | 5  | 13 | 10 | 6  |
| 11 | 10 | 4  | 4  | 9  | 9  | 14 |
| 20 | 10 | 2  | 0  | 25 | 7  | 6  |
| 23 | 50 | 0  | 2  | 7  | 5  | 16 |
| 15 | 5  | 6  | 3  | 5  | 7  | 13 |
| 6  | 11 | 1  | 0  | 4  | 4  | 12 |
| 14 | 16 | 2  | 12 | 9  | 3  | 9  |
| 15 | 9  | 3  | 1  | 16 | 6  | 3  |
| 15 | 2  | 7  | 10 | 10 | 5  | 20 |
| 3  | 10 | 0  | 0  | 8  | 1  | 1  |
| 10 | 14 | 3  | 3  | 9  | 8  | 13 |
| 2  | 11 | 1  | 0  | 22 | 1  | 11 |
| 17 | 11 | 2  | 2  | 14 | 3  | 9  |
| 4  | 6  | 1  | 0  | 10 | 9  | 8  |
| 17 | 7  | 6  | 2  | 7  | 11 | 17 |
| 2  | 2  | 0  | 1  | 5  | 0  | 2  |
| 13 | 5  | 4  | 2  | 8  | 9  | 10 |
| 19 | 5  | 2  | 1  | 6  | 5  | 7  |
| 16 | 5  | 7  | 1  | 13 | 9  | 9  |
| 5  | 2  | 7  | 0  | 8  | 3  | 9  |
| 15 | 10 | 3  | 1  | 5  | 7  | 16 |
| 11 | 16 | 8  | 4  | 10 | 17 | 18 |
| 16 | 5  | 3  | 1  | 18 | 0  | 14 |
| 12 | 8  | 1  | 3  | 6  | 4  | 14 |
| 5  | 9  | 0  | 0  | 6  | 1  | 2  |
| 10 | 10 | 0  | 0  | 11 | 3  | 7  |
| 19 | 7  | 2  | 0  | 15 | 8  | 9  |
| 19 | 18 | 5  | 3  | 9  | 5  | 15 |
| 3  | 6  | 2  | 4  | 13 | 7  | 12 |
| 5  | 1  | 8  | 0  | 4  | 7  | 2  |
| 1  | 12 | 0  | 0  | 2  | 2  | 0  |
| 9  | 3  | 2  | 4  | 24 | 5  | 9  |
| 7  | 10 | 1  | 0  | 3  | 0  | 7  |
| 8  | 14 | 1  | 0  | 10 | 3  | 9  |
| 13 | 6  | 3  | 3  | 7  | 4  | 10 |
| 6  | 12 | 1  | 0  | 13 | 1  | 4  |

|    |    |    |   |    |    |    |
|----|----|----|---|----|----|----|
| 12 | 13 | 0  | 3 | 12 | 1  | 4  |
| 1  | 9  | 3  | 0 | 10 | 5  | 3  |
| 9  | 29 | 4  | 0 | 10 | 2  | 11 |
| 10 | 5  | 1  | 0 | 10 | 7  | 4  |
| 14 | 9  | 4  | 2 | 5  | 6  | 4  |
| 14 | 6  | 0  | 3 | 6  | 5  | 7  |
| 14 | 8  | 1  | 0 | 4  | 6  | 6  |
| 0  | 3  | 0  | 0 | 8  | 1  | 7  |
| 1  | 17 | 0  | 2 | 7  | 2  | 3  |
| 12 | 11 | 5  | 0 | 6  | 1  | 9  |
| 5  | 6  | 0  | 0 | 15 | 7  | 12 |
| 5  | 18 | 1  | 5 | 5  | 5  | 3  |
| 9  | 4  | 1  | 0 | 6  | 5  | 4  |
| 4  | 6  | 0  | 1 | 18 | 5  | 2  |
| 4  | 9  | 8  | 2 | 2  | 6  | 5  |
| 1  | 3  | 1  | 0 | 5  | 2  | 2  |
| 17 | 3  | 1  | 1 | 3  | 5  | 3  |
| 3  | 1  | 4  | 0 | 5  | 1  | 7  |
| 6  | 2  | 0  | 4 | 1  | 1  | 2  |
| 8  | 5  | 7  | 2 | 3  | 7  | 2  |
| 9  | 6  | 3  | 0 | 5  | 3  | 9  |
| 1  | 1  | 14 | 3 | 11 | 3  | 0  |
| 2  | 3  | 0  | 0 | 8  | 5  | 0  |
| 4  | 3  | 0  | 0 | 4  | 6  | 4  |
| 8  | 3  | 1  | 0 | 8  | 2  | 6  |
| 2  | 3  | 1  | 1 | 5  | 2  | 6  |
| 8  | 11 | 1  | 2 | 4  | 2  | 6  |
| 8  | 4  | 1  | 0 | 14 | 6  | 8  |
| 14 | 6  | 7  | 1 | 0  | 5  | 5  |
| 1  | 7  | 2  | 0 | 7  | 2  | 26 |
| 2  | 0  | 0  | 0 | 3  | 3  | 7  |
| 10 | 7  | 2  | 4 | 2  | 4  | 7  |
| 9  | 3  | 0  | 0 | 7  | 6  | 2  |
| 0  | 8  | 1  | 1 | 6  | 1  | 3  |
| 1  | 4  | 0  | 1 | 10 | 2  | 8  |
| 4  | 4  | 3  | 0 | 12 | 5  | 7  |
| 1  | 2  | 2  | 0 | 3  | 2  | 3  |
| 2  | 7  | 0  | 1 | 7  | 5  | 2  |
| 6  | 8  | 0  | 1 | 6  | 3  | 5  |
| 0  | 13 | 1  | 0 | 6  | 15 | 5  |
| 1  | 9  | 1  | 0 | 5  | 0  | 4  |
| 8  | 8  | 0  | 2 | 11 | 6  | 3  |
| 2  | 1  | 5  | 0 | 6  | 1  | 7  |
| 1  | 1  | 4  | 0 | 5  | 1  | 8  |
| 5  | 3  | 1  | 3 | 6  | 3  | 1  |
| 10 | 0  | 1  | 0 | 1  | 0  | 6  |
| 7  | 5  | 0  | 2 | 3  | 5  | 7  |
| 2  | 5  | 0  | 1 | 11 | 3  | 2  |
| 3  | 3  | 2  | 3 | 5  | 3  | 8  |
| 2  | 4  | 2  | 0 | 61 | 4  | 6  |
| 0  | 12 | 1  | 0 | 1  | 0  | 1  |
| 0  | 2  | 0  | 0 | 1  | 0  | 0  |
| 0  | 2  | 0  | 0 | 0  | 0  | 1  |
| 0  | 1  | 1  | 0 | 7  | 0  | 3  |
| 8  | 6  | 5  | 1 | 4  | 3  | 3  |
| 9  | 1  | 3  | 1 | 9  | 8  | 7  |
| 7  | 4  | 0  | 1 | 1  | 1  | 9  |
| 10 | 4  | 3  | 0 | 0  | 5  | 4  |
| 0  | 0  | 0  | 0 | 1  | 0  | 1  |

|   |    |   |   |   |   |    |
|---|----|---|---|---|---|----|
| 9 | 5  | 0 | 0 | 5 | 1 | 0  |
| 6 | 2  | 0 | 0 | 2 | 1 | 1  |
| 1 | 6  | 0 | 0 | 8 | 0 | 3  |
| 6 | 8  | 2 | 0 | 1 | 1 | 5  |
| 4 | 1  | 1 | 1 | 2 | 4 | 1  |
| 0 | 3  | 2 | 0 | 1 | 1 | 6  |
| 0 | 2  | 0 | 0 | 0 | 1 | 0  |
| 9 | 2  | 0 | 2 | 4 | 4 | 2  |
| 0 | 10 | 1 | 0 | 2 | 1 | 4  |
| 9 | 3  | 1 | 0 | 3 | 3 | 4  |
| 7 | 6  | 3 | 1 | 9 | 1 | 4  |
| 0 | 0  | 0 | 0 | 3 | 0 | 2  |
| 6 | 5  | 1 | 0 | 5 | 2 | 5  |
| 2 | 5  | 2 | 1 | 2 | 3 | 6  |
| 2 | 0  | 3 | 2 | 2 | 2 | 3  |
| 2 | 3  | 1 | 0 | 3 | 0 | 2  |
| 6 | 6  | 3 | 1 | 5 | 1 | 4  |
| 5 | 0  | 2 | 2 | 5 | 7 | 3  |
| 8 | 5  | 0 | 1 | 0 | 4 | 9  |
| 6 | 1  | 1 | 0 | 6 | 1 | 8  |
| 7 | 1  | 1 | 0 | 1 | 5 | 0  |
| 0 | 1  | 0 | 0 | 0 | 0 | 0  |
| 4 | 4  | 1 | 0 | 7 | 2 | 6  |
| 7 | 4  | 2 | 0 | 1 | 1 | 7  |
| 3 | 3  | 0 | 0 | 4 | 2 | 6  |
| 1 | 12 | 2 | 0 | 2 | 2 | 6  |
| 1 | 2  | 0 | 0 | 7 | 3 | 0  |
| 1 | 3  | 0 | 0 | 2 | 0 | 2  |
| 6 | 4  | 0 | 2 | 1 | 1 | 3  |
| 4 | 9  | 1 | 5 | 2 | 3 | 2  |
| 7 | 0  | 0 | 1 | 1 | 2 | 0  |
| 3 | 0  | 2 | 0 | 5 | 2 | 1  |
| 0 | 0  | 1 | 0 | 5 | 2 | 2  |
| 5 | 1  | 2 | 0 | 1 | 1 | 4  |
| 2 | 12 | 0 | 1 | 3 | 1 | 5  |
| 5 | 2  | 1 | 0 | 4 | 2 | 5  |
| 4 | 4  | 0 | 0 | 7 | 1 | 2  |
| 2 | 5  | 0 | 0 | 6 | 1 | 3  |
| 3 | 3  | 1 | 2 | 0 | 3 | 5  |
| 6 | 2  | 1 | 3 | 3 | 2 | 11 |
| 4 | 2  | 0 | 0 | 3 | 4 | 5  |
| 9 | 2  | 0 | 1 | 0 | 5 | 2  |
| 2 | 4  | 2 | 0 | 2 | 4 | 1  |
| 3 | 8  | 2 | 2 | 1 | 2 | 1  |
| 3 | 4  | 0 | 0 | 4 | 4 | 2  |
| 0 | 3  | 0 | 1 | 1 | 0 | 0  |
| 8 | 2  | 0 | 1 | 1 | 1 | 2  |
| 0 | 1  | 1 | 1 | 1 | 0 | 2  |
| 2 | 4  | 2 | 1 | 1 | 3 | 2  |
| 0 | 0  | 0 | 0 | 5 | 2 | 0  |
| 0 | 0  | 1 | 0 | 1 | 0 | 4  |
| 2 | 2  | 4 | 1 | 2 | 0 | 8  |
| 1 | 6  | 0 | 0 | 4 | 0 | 1  |
| 1 | 0  | 1 | 2 | 2 | 3 | 1  |
| 1 | 0  | 1 | 0 | 1 | 0 | 4  |
| 2 | 5  | 0 | 0 | 4 | 2 | 1  |
| 4 | 2  | 1 | 0 | 5 | 4 | 2  |
| 1 | 0  | 0 | 0 | 2 | 0 | 1  |
| 0 | 0  | 1 | 0 | 0 | 0 | 1  |



|         |         |        |        |         |         |         |
|---------|---------|--------|--------|---------|---------|---------|
| 43      | 44      | 45     | 46     | 47      | 48      | 49      |
| 16      | 17      | 18     | 19     | 20      | 21      | 22      |
| CHR_NP  | CHR_NP  | CHR_NP | CHR_NP | CHR_NP  | CHR_NP  | CHR_NP  |
| D_13    | D_14    | D_3    | D_9    | E_20    | E_29    | E_4     |
| 2758841 | 2173631 | 852941 | 239935 | 1893208 | 1240451 | 2304775 |
| CHR_NP  | CHR_NP  | CHR_NP | CHR_NP | CHR_NP  | CHR_NP  | CHR_NP  |
| 14.32   | 11.69   | 14.35  | 16.84  | 6.82    | 11.42   | 12.56   |
| 2.33    | 2.81    | 4.24   | 0.60   | 4.50    | 2.31    | 2.27    |
| 2.67    | 1.26    | 3.73   | 1.69   | 2.37    | 2.75    | 2.36    |
| 1.83    | 1.12    | 0.83   | 0.28   | 1.55    | 2.20    | 1.10    |
| 2.87    | 1.46    | 2.29   | 5.43   | 2.13    | 3.94    | 2.30    |
| 0.50    | 1.60    | 0.48   | 0.18   | 2.43    | 0.50    | 1.80    |
| 1.01    | 1.56    | 0.65   | 0.84   | 3.31    | 1.47    | 1.24    |
| 0.04    | 0.55    | 0.06   | 0.06   | 0.32    | 0.09    | 0.50    |
| 0.31    | 0.86    | 0.34   | 0.20   | 1.06    | 0.53    | 1.12    |
| 0.44    | 1.52    | 0.41   | 0.13   | 0.58    | 0.43    | 0.47    |
| 0.41    | 0.97    | 0.13   | 0.60   | 0.26    | 0.31    | 0.28    |
| 0.54    | 0.33    | 0.42   | 0.40   | 0.58    | 0.70    | 0.89    |
| 0.30    | 0.44    | 0.09   | 0.13   | 0.37    | 0.31    | 0.21    |
| 0.36    | 0.19    | 0.25   | 0.72   | 0.18    | 0.30    | 0.33    |
| 0.06    | 0.26    | 0.08   | 0.02   | 0.21    | 0.13    | 0.16    |
| 0.42    | 0.22    | 0.22   | 0.60   | 0.25    | 0.52    | 0.43    |
| 0.05    | 0.28    | 0.05   | 0.02   | 0.29    | 0.09    | 0.14    |
| 0.19    | 0.37    | 0.18   | 0.11   | 0.22    | 0.25    | 0.31    |
| 0.12    | 0.33    | 0.12   | 0.02   | 0.36    | 0.13    | 0.23    |
| 0.23    | 0.39    | 0.29   | 0.19   | 0.26    | 0.32    | 0.13    |
| 0.10    | 0.20    | 0.14   | 0.11   | 0.19    | 0.21    | 0.12    |
| 0.14    | 0.24    | 0.07   | 0.04   | 0.11    | 0.11    | 0.14    |
| 0.07    | 0.46    | 0.06   | 0.01   | 0.21    | 0.17    | 0.07    |
| 0.07    | 0.20    | 0.06   | 0.01   | 0.54    | 0.11    | 0.17    |
| 0.04    | 0.06    | 0.06   | 0.02   | 0.21    | 0.06    | 0.05    |
| 0.16    | 0.17    | 0.11   | 0.07   | 0.19    | 0.15    | 0.18    |
| 0.12    | 0.06    | 0.13   | 0.43   | 0.07    | 0.17    | 0.12    |
| 0.02    | 0.14    | 0.03   | 0.03   | 0.08    | 0.05    | 0.13    |
| 0.12    | 0.08    | 0.06   | 0.04   | 0.19    | 0.12    | 0.13    |
| 0.16    | 0.15    | 0.07   | 0.16   | 0.14    | 0.16    | 0.07    |
| 0.06    | 0.15    | 0.12   | 0.02   | 0.27    | 0.14    | 0.22    |
| 0.09    | 0.04    | 0.06   | 0.04   | 0.09    | 0.13    | 0.07    |
| 0.03    | 0.10    | 0.02   | 0.03   | 0.14    | 0.05    | 0.07    |
| 0.01    | 0.21    | 0.01   | 0.02   | 0.04    | 0.03    | 0.02    |
| 0.11    | 0.07    | 0.05   | 0.04   | 0.18    | 0.12    | 0.12    |
| 0.11    | 0.15    | 0.05   | 0.08   | 0.10    | 0.08    | 0.09    |
| 0.06    | 0.11    | 0.11   | 0.03   | 0.10    | 0.10    | 0.08    |
| 0.08    | 0.04    | 0.05   | 0.02   | 0.14    | 0.04    | 0.03    |
| 0.11    | 0.11    | 0.13   | 0.14   | 0.06    | 0.11    | 0.04    |
| 0.03    | 0.01    | 0.24   | 0.51   | 0.06    | 0.08    | 0.03    |
| 0.07    | 0.09    | 0.07   | 0.29   | 0.10    | 0.12    | 0.06    |
| 0.07    | 0.06    | 0.08   | 0.12   | 0.06    | 0.09    | 0.05    |
| 0.07    | 0.06    | 0.03   | 0.12   | 0.09    | 0.07    | 0.08    |
| 0.01    | 0.04    | 0.01   | 0.00   | 0.02    | 0.01    | 0.02    |
| 0.04    | 0.03    | 0.05   | 0.03   | 0.09    | 0.07    | 0.05    |
| 0.05    | 0.03    | 0.05   | 0.03   | 0.10    | 0.09    | 0.06    |
| 0.06    | 0.06    | 0.02   | 0.03   | 0.08    | 0.05    | 0.03    |
| 0.06    | 0.06    | 0.10   | 0.10   | 0.03    | 0.09    | 0.07    |
| 0.00    | 0.01    | 0.00   | 0.00   | 0.01    | 0.00    | 0.01    |
| 0.01    | 0.08    | 0.02   | 0.01   | 0.05    | 0.04    | 0.03    |
| 0.06    | 0.02    | 0.02   | 0.04   | 0.04    | 0.05    | 0.01    |
| 0.02    | 0.09    | 0.02   | 0.01   | 0.07    | 0.04    | 0.03    |

|      |      |      |      |      |      |      |
|------|------|------|------|------|------|------|
| 0.04 | 0.06 | 0.03 | 0.12 | 0.03 | 0.03 | 0.03 |
| 0.02 | 0.05 | 0.05 | 0.00 | 0.05 | 0.04 | 0.02 |
| 0.03 | 0.06 | 0.01 | 0.07 | 0.05 | 0.05 | 0.02 |
| 0.00 | 0.02 | 0.00 | 0.00 | 0.00 | 0.00 | 0.01 |
| 0.03 | 0.04 | 0.02 | 0.02 | 0.05 | 0.02 | 0.04 |
| 0.02 | 0.03 | 0.02 | 0.01 | 0.07 | 0.05 | 0.03 |
| 0.02 | 0.03 | 0.03 | 0.01 | 0.03 | 0.03 | 0.01 |
| 0.05 | 0.03 | 0.04 | 0.02 | 0.04 | 0.02 | 0.03 |
| 0.04 | 0.02 | 0.02 | 0.02 | 0.02 | 0.03 | 0.02 |
| 0.02 | 0.04 | 0.02 | 0.02 | 0.03 | 0.03 | 0.02 |
| 0.01 | 0.01 | 0.00 | 0.00 | 0.01 | 0.00 | 0.01 |
| 0.00 | 0.00 | 0.00 | 0.00 | 0.01 | 0.00 | 0.00 |
| 0.02 | 0.02 | 0.03 | 0.02 | 0.01 | 0.03 | 0.03 |
| 0.01 | 0.02 | 0.01 | 0.01 | 0.02 | 0.01 | 0.02 |
| 0.00 | 0.03 | 0.00 | 0.00 | 0.02 | 0.01 | 0.02 |
| 0.01 | 0.01 | 0.00 | 0.00 | 0.01 | 0.00 | 0.01 |
| 0.02 | 0.03 | 0.00 | 0.02 | 0.03 | 0.01 | 0.02 |
| 0.01 | 0.02 | 0.01 | 0.00 | 0.02 | 0.00 | 0.02 |
| 0.02 | 0.02 | 0.02 | 0.04 | 0.02 | 0.03 | 0.02 |
| 0.01 | 0.01 | 0.02 | 0.03 | 0.01 | 0.01 | 0.02 |
| 0.00 | 0.02 | 0.00 | 0.00 | 0.01 | 0.00 | 0.00 |
| 0.01 | 0.02 | 0.01 | 0.00 | 0.01 | 0.01 | 0.01 |
| 0.01 | 0.02 | 0.01 | 0.00 | 0.05 | 0.02 | 0.02 |
| 0.02 | 0.01 | 0.02 | 0.01 | 0.01 | 0.03 | 0.00 |
| 0.02 | 0.02 | 0.01 | 0.03 | 0.02 | 0.02 | 0.01 |
| 0.02 | 0.01 | 0.01 | 0.01 | 0.02 | 0.01 | 0.01 |
| 0.02 | 0.01 | 0.02 | 0.04 | 0.01 | 0.02 | 0.01 |
| 0.02 | 0.02 | 0.01 | 0.00 | 0.01 | 0.02 | 0.01 |
| 0.01 | 0.01 | 0.00 | 0.00 | 0.02 | 0.01 | 0.01 |
| 0.02 | 0.01 | 0.01 | 0.03 | 0.01 | 0.02 | 0.02 |
| 0.02 | 0.01 | 0.01 | 0.01 | 0.01 | 0.02 | 0.01 |
| 0.00 | 0.10 | 0.00 | 0.00 | 0.01 | 0.01 | 0.00 |
| 0.01 | 0.01 | 0.00 | 0.00 | 0.03 | 0.01 | 0.00 |
| 0.01 | 0.01 | 0.01 | 0.06 | 0.01 | 0.01 | 0.01 |
| 0.02 | 0.01 | 0.02 | 0.05 | 0.01 | 0.02 | 0.02 |
| 0.00 | 0.00 | 0.00 | 0.00 | 0.01 | 0.00 | 0.01 |
| 0.00 | 0.01 | 0.00 | 0.00 | 0.02 | 0.01 | 0.01 |
| 0.01 | 0.00 | 0.01 | 0.01 | 0.01 | 0.01 | 0.00 |
| 0.01 | 0.01 | 0.02 | 0.01 | 0.01 | 0.01 | 0.01 |
| 0.00 | 0.00 | 0.00 | 0.00 | 0.00 | 0.00 | 0.00 |
| 0.01 | 0.01 | 0.00 | 0.01 | 0.02 | 0.01 | 0.02 |
| 0.01 | 0.01 | 0.00 | 0.00 | 0.01 | 0.01 | 0.01 |
| 0.00 | 0.01 | 0.00 | 0.00 | 0.01 | 0.00 | 0.00 |
| 0.01 | 0.01 | 0.02 | 0.01 | 0.01 | 0.01 | 0.01 |
| 0.01 | 0.01 | 0.01 | 0.02 | 0.01 | 0.01 | 0.01 |
| 0.01 | 0.00 | 0.02 | 0.02 | 0.01 | 0.01 | 0.00 |
| 0.00 | 0.01 | 0.00 | 0.00 | 0.00 | 0.00 | 0.00 |
| 0.01 | 0.01 | 0.00 | 0.02 | 0.00 | 0.00 | 0.00 |
| 0.01 | 0.01 | 0.00 | 0.00 | 0.01 | 0.01 | 0.01 |
| 0.01 | 0.00 | 0.01 | 0.03 | 0.00 | 0.01 | 0.00 |
| 0.00 | 0.01 | 0.00 | 0.00 | 0.01 | 0.00 | 0.00 |
| 0.00 | 0.01 | 0.00 | 0.00 | 0.01 | 0.00 | 0.01 |
| 0.00 | 0.00 | 0.00 | 0.00 | 0.00 | 0.00 | 0.00 |
| 0.01 | 0.01 | 0.01 | 0.04 | 0.01 | 0.01 | 0.01 |
| 0.00 | 0.01 | 0.00 | 0.00 | 0.01 | 0.01 | 0.01 |
| 0.00 | 0.01 | 0.00 | 0.00 | 0.00 | 0.00 | 0.00 |
| 0.00 | 0.01 | 0.00 | 0.01 | 0.00 | 0.00 | 0.00 |
| 0.00 | 0.01 | 0.01 | 0.00 | 0.01 | 0.01 | 0.01 |









|       |       |       |       |       |       |       |
|-------|-------|-------|-------|-------|-------|-------|
| -0.55 | 0.53  | -0.49 | -0.78 | 0.93  | -0.12 | 1.04  |
| -0.82 | 1.96  | -0.90 | -1.61 | -0.45 | -0.85 | -0.73 |
| -0.23 | 1.88  | -1.29 | 0.47  | -0.81 | -0.60 | -0.72 |
| 0.39  | -1.43 | -0.60 | -0.85 | 0.82  | 1.89  | 3.59  |
| -0.36 | 0.49  | -1.55 | -1.30 | 0.09  | -0.26 | -0.88 |
| -0.60 | -1.59 | -1.23 | 1.47  | -1.66 | -0.98 | -0.77 |
| -0.75 | 0.18  | -0.66 | -0.92 | -0.02 | -0.40 | -0.28 |
| 0.55  | -0.32 | -0.34 | 1.32  | -0.19 | 0.98  | 0.58  |
| -0.67 | 0.76  | -0.68 | -0.85 | 0.85  | -0.42 | -0.14 |
| -0.28 | 1.57  | -0.39 | -1.04 | 0.06  | 0.33  | 0.95  |
| -0.52 | 1.34  | -0.53 | -1.41 | 1.57  | -0.49 | 0.40  |
| -0.02 | 1.61  | 0.55  | -0.43 | 0.34  | 0.89  | -1.03 |
| -0.89 | 0.67  | -0.22 | -0.69 | 0.47  | 0.77  | -0.55 |
| -0.17 | 1.30  | -1.23 | -1.70 | -0.60 | -0.63 | -0.22 |
| -0.56 | 4.26  | -0.77 | -1.32 | 1.09  | 0.62  | -0.59 |
| -0.45 | 0.74  | -0.58 | -1.03 | 3.98  | -0.10 | 0.46  |
| -0.50 | -0.41 | -0.39 | -0.62 | 0.48  | -0.44 | -0.50 |
| 0.79  | 1.09  | -0.03 | -0.90 | 1.33  | 0.71  | 1.23  |
| -0.32 | -1.18 | -0.15 | 4.71  | -1.09 | 0.45  | -0.26 |
| -0.84 | 0.25  | -0.78 | -0.79 | -0.36 | -0.60 | 0.17  |
| 0.22  | -0.49 | -0.93 | -1.27 | 1.67  | 0.32  | 0.47  |
| 1.36  | 1.23  | -0.73 | 1.28  | 0.91  | 1.35  | -0.69 |
| -0.81 | 1.48  | 0.76  | -1.56 | 4.26  | 1.25  | 2.98  |
| -0.61 | -1.62 | -1.22 | -1.54 | -0.61 | 0.24  | -1.08 |
| -0.47 | 0.67  | -0.65 | -0.46 | 1.22  | -0.20 | 0.14  |
| -0.33 | 0.72  | -0.32 | -0.31 | -0.19 | -0.23 | -0.29 |
| 0.36  | -0.44 | -0.89 | -1.26 | 1.95  | 0.51  | 0.66  |
| -0.18 | 0.02  | -0.60 | -0.40 | -0.28 | -0.39 | -0.31 |
| -0.61 | 0.01  | -0.04 | -1.03 | -0.11 | -0.17 | -0.39 |
| -0.15 | -0.54 | -0.46 | -0.70 | 0.50  | -0.49 | -0.60 |
| 0.14  | 0.10  | 0.38  | 0.48  | -0.43 | 0.15  | -0.66 |
| -0.59 | -0.70 | 1.17  | 3.29  | -0.30 | -0.18 | -0.54 |
| -0.21 | 0.21  | -0.10 | 4.35  | 0.48  | 0.83  | -0.35 |
| 0.12  | -0.18 | 0.44  | 1.67  | -0.16 | 0.50  | -0.56 |
| 0.24  | -0.33 | -1.21 | 2.06  | 0.89  | 0.03  | 0.52  |
| -0.80 | 0.01  | -0.61 | -0.83 | -0.31 | -0.71 | -0.46 |
| -0.48 | -0.75 | -0.31 | -0.71 | 0.49  | 0.13  | -0.24 |
| 0.33  | -0.99 | -0.07 | -1.28 | 3.70  | 3.47  | 1.02  |
| 0.87  | 0.98  | -0.88 | -0.30 | 1.61  | 0.33  | -0.30 |
| 0.25  | 0.30  | 1.52  | 1.74  | -0.79 | 1.29  | 0.57  |
| -0.28 | -0.21 | -0.36 | -0.29 | -0.19 | -0.25 | -0.10 |
| -0.48 | 1.07  | -0.32 | -0.53 | 0.53  | 0.12  | -0.08 |
| 1.22  | -0.99 | -0.93 | 0.39  | 0.07  | 0.95  | -1.45 |
| -0.33 | 1.56  | -0.40 | -0.73 | 0.97  | 0.02  | -0.17 |
| 0.57  | 2.20  | -0.32 | 6.32  | -0.61 | -0.23 | -0.12 |
| -0.63 | 1.23  | 0.95  | -1.41 | 1.22  | 0.38  | -0.62 |
| 0.15  | 1.96  | -0.83 | 2.24  | 1.52  | 1.39  | -0.50 |

|       |       |       |       |       |       |       |
|-------|-------|-------|-------|-------|-------|-------|
| -0.31 | 0.25  | -0.35 | -0.31 | -0.21 | -0.26 | -0.16 |
| 0.14  | 1.17  | -0.77 | -0.98 | 1.83  | -0.49 | 0.75  |
| -0.49 | 0.39  | -0.49 | -1.50 | 3.44  | 2.39  | 0.87  |
| -0.60 | 0.06  | -0.16 | -1.45 | -0.04 | -0.34 | -1.19 |
| 0.22  | -0.25 | -0.08 | -0.47 | -0.11 | -0.62 | -0.18 |
| 1.12  | 0.00  | -0.76 | -0.23 | -0.19 | 0.68  | -0.15 |
| -0.57 | 1.53  | 0.09  | -0.27 | 0.95  | 0.98  | 0.07  |
| -0.32 | 0.13  | -0.52 | -0.61 | -0.19 | -0.63 | -0.20 |
| -0.16 | -0.19 | -0.22 | -0.16 | 0.07  | -0.20 | -0.17 |
| -0.71 | -0.78 | 0.04  | -0.45 | -1.32 | -0.19 | 0.17  |
| -0.59 | 0.82  | -0.95 | -1.02 | 0.36  | -0.69 | 0.02  |
| -0.60 | 0.95  | -0.57 | -0.70 | 0.35  | -0.02 | 0.42  |
| -0.54 | 0.34  | -0.85 | -0.71 | -0.14 | -0.67 | -0.10 |
| 0.42  | 2.26  | -0.96 | 0.38  | 2.15  | 0.20  | 0.64  |
| -0.32 | -0.21 | -0.35 | -0.37 | -0.20 | -0.37 | -0.21 |
| 0.23  | -0.07 | 0.24  | 1.15  | -0.23 | 0.47  | 0.02  |
| -0.84 | -1.21 | -0.34 | 0.83  | -1.36 | -0.63 | 0.04  |
| -0.62 | 0.54  | -0.55 | -0.88 | -0.12 | -0.55 | -0.48 |
| -0.96 | 1.33  | -0.82 | -1.26 | -0.37 | -0.53 | 0.00  |
| -0.09 | 0.79  | -0.65 | -1.11 | 5.19  | 0.73  | 0.53  |
| 0.10  | -0.81 | -0.15 | -0.40 | -0.81 | 0.72  | -1.14 |
| 0.07  | 1.14  | -0.17 | 2.21  | 0.78  | 0.13  | -0.12 |
| -0.09 | -0.20 | -0.21 | -0.32 | -0.14 | -0.39 | -0.30 |
| 0.19  | -0.68 | 0.48  | 1.62  | -0.90 | 0.18  | -0.50 |
| 0.17  | 0.30  | -0.58 | -0.96 | -0.37 | 0.33  | -0.26 |
| -0.55 | -0.62 | -1.57 | -1.57 | 1.61  | -0.53 | 0.10  |
| 0.77  | 0.07  | -0.04 | 2.72  | -0.14 | 1.23  | 0.47  |
| -0.11 | -0.44 | -0.34 | -0.68 | -0.68 | -0.14 | -0.34 |
| -0.35 | 4.02  | -0.47 | -0.50 | -0.16 | 0.07  | -0.37 |
| -0.35 | 0.80  | -0.99 | -0.92 | 3.52  | -0.23 | -0.70 |
| 1.00  | 0.30  | -0.53 | 8.68  | 0.53  | 0.69  | 0.52  |
| 1.26  | -0.62 | 2.34  | 8.03  | -0.96 | 0.88  | 0.41  |
| -0.55 | -0.31 | -0.55 | -0.85 | 0.54  | -0.51 | 0.89  |
| -1.18 | 0.65  | -0.99 | -1.96 | 2.40  | 1.10  | 0.90  |
| -0.19 | -0.99 | 0.02  | -0.33 | -0.01 | -0.41 | -0.94 |
| 0.60  | -0.51 | 2.08  | 0.08  | 0.89  | 1.10  | -0.50 |
| -0.14 | -0.17 | -0.29 | -0.16 | -0.22 | -0.24 | -0.06 |
| -0.01 | -0.23 | -0.77 | 0.68  | 2.73  | 0.90  | 2.36  |
| 0.13  | 0.26  | -0.69 | -1.11 | 0.86  | -0.04 | 1.75  |
| -0.38 | 1.02  | -0.58 | -0.44 | 0.41  | -0.31 | 0.23  |
| -0.57 | 0.51  | -0.29 | -0.48 | 1.04  | 0.16  | 0.18  |
| 0.31  | -0.10 | 3.01  | 1.26  | -0.61 | 1.21  | -0.49 |
| 0.50  | 0.85  | 2.29  | 3.86  | -0.56 | 2.49  | 0.70  |
| 0.34  | -0.84 | 1.95  | 2.12  | -0.07 | 0.49  | -0.59 |
| -0.53 | 1.26  | -0.56 | -0.78 | -0.12 | -0.61 | -0.11 |
| -0.07 | 0.59  | -0.57 | 2.37  | -0.23 | -0.24 | -0.34 |
| 0.23  | 0.26  | -0.40 | -1.07 | 3.27  | 1.53  | 0.95  |
| 0.03  | -1.02 | 0.08  | 5.20  | -0.58 | 0.21  | -0.80 |

|       |       |       |       |       |       |       |
|-------|-------|-------|-------|-------|-------|-------|
| -0.33 | -0.26 | -0.43 | -0.65 | -0.25 | -0.45 | -0.44 |
| -0.94 | 1.76  | -0.39 | -0.94 | 0.16  | -0.77 | 0.47  |
| -0.75 | 0.45  | -0.54 | -0.90 | -0.31 | -0.59 | -0.29 |
| 0.45  | 0.75  | 0.84  | 10.03 | 0.59  | 0.71  | 0.63  |
| -0.26 | 0.47  | -0.33 | -0.77 | 1.10  | 0.14  | -0.22 |
| -0.73 | 1.60  | -1.05 | -0.32 | 0.19  | -0.37 | 0.20  |
| -0.82 | 2.47  | -0.98 | 2.35  | -0.25 | -0.17 | 0.15  |
| -0.38 | 0.55  | 1.16  | -1.45 | 0.92  | 0.65  | 0.74  |
| 0.39  | 0.20  | 0.82  | 0.74  | 0.35  | 0.90  | -0.05 |
| 1.13  | 1.89  | 1.54  | 1.13  | 0.21  | -0.04 | 0.07  |
| -0.59 | 0.18  | -1.07 | -1.00 | -0.02 | -0.90 | -0.29 |
| -0.44 | -1.00 | -0.17 | -0.51 | 0.00  | 1.19  | -0.20 |
| -0.01 | -1.50 | -0.69 | -1.73 | -1.07 | 0.38  | -1.24 |
| 0.15  | 2.85  | -1.20 | -1.25 | 0.94  | 0.20  | -0.05 |
| -0.09 | 2.03  | -0.76 | -0.54 | 0.93  | 0.16  | 0.44  |
| -0.09 | 2.03  | -0.76 | -0.54 | 0.93  | 0.16  | 0.44  |
| -0.36 | 0.22  | 0.08  | -1.02 | -0.38 | -0.62 | -0.40 |
| 0.38  | 0.44  | -0.63 | 4.19  | -0.17 | -0.17 | 0.86  |
| 0.33  | 0.76  | 1.00  | -1.55 | -0.04 | 1.09  | 1.03  |
| -0.39 | -0.53 | -0.12 | -0.72 | 1.33  | 1.35  | -0.51 |
| -0.56 | 1.53  | 0.69  | -1.02 | 0.67  | 0.98  | 0.35  |
| -0.18 | 0.29  | -0.20 | -0.24 | 0.02  | -0.18 | -0.18 |
| 0.09  | -0.16 | -0.12 | 0.05  | -0.74 | 0.28  | 0.20  |
| 1.01  | -0.42 | -0.49 | 7.11  | 0.78  | -0.31 | -0.56 |
| 0.44  | -0.15 | 0.95  | -0.67 | 0.34  | 0.82  | 0.46  |
| 0.41  | -0.39 | 0.52  | 1.69  | 0.12  | -0.18 | -0.38 |
| 0.12  | -0.22 | 0.17  | 0.43  | -0.09 | 0.05  | -0.27 |
| 0.03  | -0.51 | -0.54 | 1.20  | 0.02  | -0.34 | -0.24 |
| -0.14 | 1.29  | 2.78  | -0.33 | 0.87  | 0.78  | 0.55  |
| 1.35  | 0.08  | -0.86 | -1.53 | 1.79  | -0.08 | 0.09  |
| -0.39 | 0.80  | -0.48 | 5.29  | 0.28  | -0.08 | -0.21 |
| -0.43 | 0.57  | -0.62 | 1.27  | 1.23  | 0.27  | -0.12 |
| 1.04  | 1.99  | -0.13 | -0.09 | 1.16  | 0.47  | -0.52 |

| 6            | 7           | 8           | 9           | 10          | 11           | 12          |
|--------------|-------------|-------------|-------------|-------------|--------------|-------------|
| 42           | 43          | 44          | 45          | 46          | 47           | 48          |
| TGAGGGGCAGAG | TTCACCACCTT | AACATTCATTG | TCAGGCTCAGT | CTGACCTATGA | TCTCACACAGAA | AGCTACATCTG |
| miR-423-5p   | miR-197-3p  | miR-181b-5p | miR-484     | miR-192-5p  | miR-342-3p   | miR-222-3p  |
| 312449       | 286288      | 270366      | 261666      | 248983      | 229733       | 221365      |
| -0.27        | 0.21        | -0.55       | 0.57        | -0.83       | 1.43         | 0.56        |
| -0.54        | 1.16        | -1.07       | 1.61        | 1.81        | 2.87         | -0.96       |
| -0.18        | -0.97       | -1.03       | 0.17        | 0.07        | -0.15        | -0.09       |
| -0.22        | -0.75       | -1.07       | -0.40       | -0.61       | -0.52        | -0.40       |
| -0.64        | 1.99        | 0.47        | 3.70        | -0.23       | 2.74         | -0.45       |
| -0.26        | -1.22       | 0.32        | -0.57       | -0.70       | -0.91        | 1.34        |
| -0.17        | -0.04       | 0.88        | -0.28       | -0.79       | -0.48        | 1.65        |
| 1.03         | 1.10        | 0.03        | -0.23       | -0.79       | -0.94        | -0.92       |
| -0.42        | -0.71       | -1.58       | -0.29       | 0.01        | -0.81        | -1.72       |
| -0.65        | -0.46       | -1.31       | -0.04       | 1.07        | 1.01         | -1.64       |
| -0.42        | -0.38       | -0.92       | 0.18        | 1.19        | 0.50         | -0.47       |
| 4.21         | -0.84       | 2.09        | -1.14       | -0.72       | -0.39        | 0.20        |
| -0.53        | -0.01       | -0.13       | -0.87       | 1.93        | -0.10        | 0.88        |
| 0.39         | 0.25        | 0.77        | 0.19        | -0.73       | -0.53        | -1.51       |
| -0.57        | -0.10       | -0.70       | -0.05       | -0.32       | -0.73        | -0.48       |
| -0.58        | -0.52       | 0.40        | -0.80       | 0.13        | -0.38        | 1.01        |
| -0.39        | 0.19        | 1.79        | 0.64        | -0.76       | 0.22         | -0.21       |
| -0.10        | -0.47       | -0.59       | -0.58       | 0.19        | -0.36        | -0.88       |
| -0.19        | -0.50       | 0.68        | -1.06       | 0.00        | -0.14        | 0.37        |
| -0.22        | -0.50       | -0.57       | -0.23       | 2.41        | -0.15        | 0.37        |

|       |       |       |       |       |       |       |
|-------|-------|-------|-------|-------|-------|-------|
| -0.63 | -0.98 | 0.22  | -0.77 | -0.56 | -0.91 | 0.72  |
| 1.82  | 1.65  | 0.75  | -0.23 | -0.83 | -0.22 | 1.82  |
| 0.09  | 0.92  | 0.69  | -0.32 | -0.70 | -0.34 | 1.48  |
| -0.07 | 0.42  | 1.22  | 0.12  | -0.76 | -0.49 | 0.47  |
| 0.25  | 2.62  | -0.65 | 1.60  | -0.55 | -0.50 | -0.96 |
| -0.17 | -0.84 | 1.18  | -0.13 | -0.69 | 0.92  | 0.45  |
| -0.58 | -1.23 | -1.33 | -0.78 | 1.77  | -0.65 | -0.62 |
| -0.52 | -1.13 | -1.59 | -1.00 | 4.11  | -0.52 | -1.11 |
| -0.44 | 0.08  | -1.15 | -0.40 | 0.22  | 0.10  | 1.40  |
| -0.72 | -0.63 | -1.50 | -0.48 | 0.63  | 0.13  | -0.92 |
| -0.65 | 0.23  | -1.58 | 2.88  | -0.21 | -0.65 | -1.38 |
| -0.45 | -0.55 | -1.12 | -0.38 | 5.41  | 0.65  | 0.51  |
| -0.56 | 1.34  | -1.61 | 3.19  | 2.62  | 0.24  | -1.78 |
| -0.09 | 3.08  | -0.80 | 0.82  | -0.69 | -0.85 | 1.29  |
| -0.55 | 1.82  | -0.59 | 0.58  | -0.30 | -0.11 | 0.40  |
| 0.14  | 0.77  | 0.68  | -0.07 | -0.75 | 0.23  | 2.02  |
| 3.28  | -1.16 | -1.28 | -1.19 | -0.87 | -1.22 | -1.26 |
| -0.70 | -0.43 | 0.01  | -1.73 | 0.17  | -0.47 | -0.22 |
| -0.71 | -0.36 | -0.08 | -1.21 | 1.53  | 2.50  | 0.02  |
| 0.17  | 0.56  | 1.90  | -0.78 | -0.48 | 1.08  | 0.42  |
| 2.65  | 8.40  | 2.31  | 3.64  | -0.67 | 0.20  | -0.04 |
| 3.67  | 8.63  | 3.41  | 2.87  | -0.52 | 3.57  | 7.71  |
| -0.59 | -0.21 | 0.12  | 0.24  | -0.80 | -0.48 | 0.33  |
| -0.70 | 0.21  | -0.18 | -0.33 | 0.01  | -0.75 | -0.99 |
| 1.17  | -0.10 | 0.44  | -1.21 | -0.61 | -0.31 | -0.07 |
| 3.29  | 4.35  | 1.67  | 2.06  | -0.83 | -0.71 | -1.28 |
| -0.30 | 0.48  | -0.16 | 0.89  | -0.31 | 0.49  | 3.70  |
| -0.18 | 0.83  | 0.50  | 0.03  | -0.71 | 0.13  | 3.47  |
| -0.54 | -0.35 | -0.56 | 0.52  | -0.46 | -0.24 | 1.02  |
| -0.29 | -0.23 | 1.05  | 0.45  | -0.71 | 0.82  | 1.87  |
| -0.57 | -0.68 | 0.83  | -0.24 | -0.34 | 0.83  | 2.38  |
| -0.40 | 0.00  | -0.56 | 0.83  | -0.82 | -0.54 | 3.13  |
| -0.45 | -0.22 | -1.15 | 0.84  | -0.82 | -0.98 | 1.13  |
| -0.49 | 0.06  | -0.45 | 0.70  | -0.65 | -0.08 | 1.27  |
| 0.61  | -0.84 | 0.08  | -0.62 | -0.76 | -0.91 | 4.19  |
| -0.37 | -0.50 | -0.46 | 1.00  | -0.80 | -0.49 | 0.59  |
| -0.63 | -0.89 | -0.81 | -0.20 | -0.67 | -0.76 | 0.81  |
| -0.35 | -1.33 | 0.05  | -1.47 | 3.52  | -0.58 | -1.18 |
| 0.40  | 0.37  | 1.69  | -0.03 | -0.79 | 0.01  | 1.34  |
| -0.33 | 0.33  | 1.93  | 0.38  | -0.09 | -0.23 | 3.04  |
| -0.45 | 0.60  | 1.39  | 0.84  | -0.05 | 0.44  | 0.71  |
| -0.30 | -1.31 | -1.11 | -1.29 | 5.44  | -0.88 | -1.74 |
| 0.62  | -0.58 | -0.18 | 0.36  | -0.78 | -0.74 | -1.13 |
| 0.45  | -1.09 | -0.23 | -0.49 | -0.59 | -0.61 | 0.12  |
| -0.16 | -1.18 | -0.73 | -0.17 | -0.16 | -0.63 | -1.15 |
| 0.66  | -0.80 | 2.04  | -0.99 | 0.07  | 0.03  | -0.33 |
| -0.63 | -0.90 | -1.60 | -0.77 | 0.08  | -0.06 | -0.94 |
| -0.69 | 1.29  | -1.70 | 0.51  | 1.46  | 1.34  | -0.36 |
| 0.67  | 1.37  | 0.20  | 3.77  | -0.20 | -0.06 | 0.79  |
| -0.22 | 2.17  | 0.98  | 2.80  | -0.32 | 0.49  | 4.54  |
| -0.21 | 0.09  | -0.83 | -0.01 | -0.67 | -0.45 | 0.98  |
| -0.28 | -1.43 | -0.94 | -0.67 | 2.05  | -0.33 | -0.94 |
| -0.39 | -1.05 | -0.99 | -0.85 | 0.27  | -0.83 | -1.21 |
| -0.39 | 0.00  | 0.23  | -0.73 | 0.66  | 0.04  | -0.07 |
| 6.68  | 15.37 | 3.15  | 7.94  | -0.84 | 2.81  | 2.97  |
| -0.40 | -0.85 | 0.54  | -1.14 | -0.03 | -0.51 | -0.06 |
| -0.62 | -0.70 | -0.52 | -1.35 | 0.82  | 0.15  | -0.84 |
| 1.22  | -1.01 | 0.94  | -1.76 | 0.97  | -0.66 | -1.04 |
| -0.68 | -0.64 | -0.28 | 1.72  | 0.38  | 0.51  | 1.23  |

|       |       |       |       |       |       |       |
|-------|-------|-------|-------|-------|-------|-------|
| -0.54 | -0.50 | -0.65 | 0.68  | -0.17 | 0.44  | 0.93  |
| -0.47 | -0.26 | -0.85 | 2.17  | -0.69 | 0.12  | -0.42 |
| -0.49 | -0.30 | -0.32 | 0.81  | -0.39 | 0.95  | 1.56  |
| 0.11  | -0.64 | 0.76  | 0.28  | -0.74 | 0.57  | 0.27  |
| -0.55 | -0.45 | 0.11  | -0.14 | 3.65  | 1.77  | -0.07 |
| -0.53 | -1.23 | -1.13 | -1.27 | 6.22  | -0.59 | -1.45 |
| 0.09  | 0.19  | -0.32 | 1.37  | -0.61 | 1.03  | 2.03  |
| -0.33 | -0.09 | 0.13  | 0.08  | -0.63 | 0.86  | 1.79  |
| -0.59 | -0.10 | -0.35 | 0.35  | -0.67 | 0.11  | 0.40  |
| -0.36 | -0.61 | -0.05 | -1.26 | 0.24  | -0.71 | 0.69  |
| -0.16 | 0.04  | -0.26 | 0.86  | -0.64 | 0.13  | 1.11  |
| -0.25 | -1.22 | 0.02  | -1.51 | 5.00  | -0.71 | -1.58 |
| -0.68 | -0.68 | -0.10 | -1.07 | -0.68 | -1.01 | -0.23 |
| 0.45  | 1.11  | 1.75  | -0.18 | -0.77 | -0.55 | 1.56  |
| -0.64 | -1.08 | -0.88 | -1.18 | -0.18 | -0.84 | -1.16 |
| -0.59 | -0.98 | -0.12 | -0.62 | -0.15 | 0.32  | -0.89 |

|      |      |      |      |      |      |      |
|------|------|------|------|------|------|------|
| 0    | -1   | -1   | -1   | 0    | -1   | 0    |
| 0.00 | 0.00 | 0.00 | 0.00 | 0.00 | 0.00 | 0.00 |
| 1.00 | 1.00 | 1.00 | 1.00 | 1.00 | 1.00 | 1.00 |
| 0.73 | 0.72 | 0.90 | 0.94 | 0.52 | 0.37 | 0.33 |

| 40         | 41         | 42          | 43      | 44         | 45         | 46         |
|------------|------------|-------------|---------|------------|------------|------------|
| miR-423-5p | miR-197-3p | miR-181b-5p | miR-484 | miR-192-5p | miR-342-3p | miR-222-3p |
| 312449     | 286288     | 270366      | 261666  | 248983     | 229733     | 221365     |
| -0.27      | 0.21       | -0.55       | 0.57    | -0.83      | 1.43       | 0.56       |
| -0.54      | 1.16       | -1.07       | 1.61    | 1.81       | 2.87       | -0.96      |
| -0.18      | -0.97      | -1.03       | 0.17    | 0.07       | -0.15      | -0.09      |
| -0.22      | -0.75      | -1.07       | -0.40   | -0.61      | -0.52      | -0.40      |
| -0.64      | 1.99       | 0.47        | 3.70    | -0.23      | 2.74       | -0.45      |
| -0.26      | -1.22      | 0.32        | -0.57   | -0.70      | -0.91      | 1.34       |
| -0.17      | -0.04      | 0.88        | -0.28   | -0.79      | -0.48      | 1.65       |
| 1.03       | 1.10       | 0.03        | -0.23   | -0.79      | -0.94      | -0.92      |
| -0.42      | -0.71      | -1.58       | -0.29   | 0.01       | -0.81      | -1.72      |
| -0.65      | -0.46      | -1.31       | -0.04   | 1.07       | 1.01       | -1.64      |
| -0.42      | -0.38      | -0.92       | 0.18    | 1.19       | 0.50       | -0.47      |
| 4.21       | -0.84      | 2.09        | -1.14   | -0.72      | -0.39      | 0.20       |
| -0.53      | -0.01      | -0.13       | -0.87   | 1.93       | -0.10      | 0.88       |
| 0.39       | 0.25       | 0.77        | 0.19    | -0.73      | -0.53      | -1.51      |
| -0.57      | -0.10      | -0.70       | -0.05   | -0.32      | -0.73      | -0.48      |
| -0.58      | -0.52      | 0.40        | -0.80   | 0.13       | -0.38      | 1.01       |
| -0.39      | 0.19       | 1.79        | 0.64    | -0.76      | 0.22       | -0.21      |
| -0.10      | -0.47      | -0.59       | -0.58   | 0.19       | -0.36      | -0.88      |
| -0.19      | -0.50      | 0.68        | -1.06   | 0.00       | -0.14      | 0.37       |
| -0.22      | -0.50      | -0.57       | -0.23   | 2.41       | -0.15      | 0.37       |
| -0.63      | -0.98      | 0.22        | -0.77   | -0.56      | -0.91      | 0.72       |
| 1.82       | 1.65       | 0.75        | -0.23   | -0.83      | -0.22      | 1.82       |
| 0.09       | 0.92       | 0.69        | -0.32   | -0.70      | -0.34      | 1.48       |
| -0.07      | 0.42       | 1.22        | 0.12    | -0.76      | -0.49      | 0.47       |
| 0.25       | 2.62       | -0.65       | 1.60    | -0.55      | -0.50      | -0.96      |
| -0.17      | -0.84      | 1.18        | -0.13   | -0.69      | 0.92       | 0.45       |
| -0.58      | -1.23      | -1.33       | -0.78   | 1.77       | -0.65      | -0.62      |
| -0.52      | -1.13      | -1.59       | -1.00   | 4.11       | -0.52      | -1.11      |

|       |       |       |       |       |       |       |
|-------|-------|-------|-------|-------|-------|-------|
| -0.44 | 0.08  | -1.15 | -0.40 | 0.22  | 0.10  | 1.40  |
| -0.72 | -0.63 | -1.50 | -0.48 | 0.63  | 0.13  | -0.92 |
| -0.65 | 0.23  | -1.58 | 2.88  | -0.21 | -0.65 | -1.38 |
| -0.45 | -0.55 | -1.12 | -0.38 | 5.41  | 0.65  | 0.51  |
| -0.56 | 1.34  | -1.61 | 3.19  | 2.62  | 0.24  | -1.78 |
| -0.09 | 3.08  | -0.80 | 0.82  | -0.69 | -0.85 | 1.29  |
| -0.55 | 1.82  | -0.59 | 0.58  | -0.30 | -0.11 | 0.40  |
| 0.14  | 0.77  | 0.68  | -0.07 | -0.75 | 0.23  | 2.02  |
| 3.28  | -1.16 | -1.28 | -1.19 | -0.87 | -1.22 | -1.26 |
| -0.70 | -0.43 | 0.01  | -1.73 | 0.17  | -0.47 | -0.22 |
| -0.71 | -0.36 | -0.08 | -1.21 | 1.53  | 2.50  | 0.02  |
| 0.17  | 0.56  | 1.90  | -0.78 | -0.48 | 1.08  | 0.42  |
| 2.65  | 8.40  | 2.31  | 3.64  | -0.67 | 0.20  | -0.04 |
| 3.67  | 8.63  | 3.41  | 2.87  | -0.52 | 3.57  | 7.71  |
| -0.59 | -0.21 | 0.12  | 0.24  | -0.80 | -0.48 | 0.33  |
| -0.70 | 0.21  | -0.18 | -0.33 | 0.01  | -0.75 | -0.99 |
| 1.17  | -0.10 | 0.44  | -1.21 | -0.61 | -0.31 | -0.07 |
| 3.29  | 4.35  | 1.67  | 2.06  | -0.83 | -0.71 | -1.28 |
| -0.30 | 0.48  | -0.16 | 0.89  | -0.31 | 0.49  | 3.70  |
| -0.18 | 0.83  | 0.50  | 0.03  | -0.71 | 0.13  | 3.47  |
| -0.54 | -0.35 | -0.56 | 0.52  | -0.46 | -0.24 | 1.02  |
| -0.29 | -0.23 | 1.05  | 0.45  | -0.71 | 0.82  | 1.87  |
| -0.57 | -0.68 | 0.83  | -0.24 | -0.34 | 0.83  | 2.38  |
| -0.40 | 0.00  | -0.56 | 0.83  | -0.82 | -0.54 | 3.13  |
| -0.45 | -0.22 | -1.15 | 0.84  | -0.82 | -0.98 | 1.13  |
| -0.49 | 0.06  | -0.45 | 0.70  | -0.65 | -0.08 | 1.27  |
| 0.61  | -0.84 | 0.08  | -0.62 | -0.76 | -0.91 | 4.19  |
| -0.37 | -0.50 | -0.46 | 1.00  | -0.80 | -0.49 | 0.59  |
| -0.63 | -0.89 | -0.81 | -0.20 | -0.67 | -0.76 | 0.81  |
| -0.35 | -1.33 | 0.05  | -1.47 | 3.52  | -0.58 | -1.18 |
| 0.40  | 0.37  | 1.69  | -0.03 | -0.79 | 0.01  | 1.34  |
| -0.33 | 0.33  | 1.93  | 0.38  | -0.09 | -0.23 | 3.04  |
| -0.45 | 0.60  | 1.39  | 0.84  | -0.05 | 0.44  | 0.71  |
| -0.30 | -1.31 | -1.11 | -1.29 | 5.44  | -0.88 | -1.74 |
| 0.62  | -0.58 | -0.18 | 0.36  | -0.78 | -0.74 | -1.13 |
| 0.45  | -1.09 | -0.23 | -0.49 | -0.59 | -0.61 | 0.12  |
| -0.16 | -1.18 | -0.73 | -0.17 | -0.16 | -0.63 | -1.15 |
| 0.66  | -0.80 | 2.04  | -0.99 | 0.07  | 0.03  | -0.33 |
| -0.63 | -0.90 | -1.60 | -0.77 | 0.08  | -0.06 | -0.94 |
| -0.69 | 1.29  | -1.70 | 0.51  | 1.46  | 1.34  | -0.36 |
| 0.67  | 1.37  | 0.20  | 3.77  | -0.20 | -0.06 | 0.79  |
| -0.22 | 2.17  | 0.98  | 2.80  | -0.32 | 0.49  | 4.54  |
| -0.21 | 0.09  | -0.83 | -0.01 | -0.67 | -0.45 | 0.98  |
| -0.28 | -1.43 | -0.94 | -0.67 | 2.05  | -0.33 | -0.94 |
| -0.39 | -1.05 | -0.99 | -0.85 | 0.27  | -0.83 | -1.21 |
| -0.39 | 0.00  | 0.23  | -0.73 | 0.66  | 0.04  | -0.07 |
| 6.68  | 15.37 | 3.15  | 7.94  | -0.84 | 2.81  | 2.97  |
| -0.40 | -0.85 | 0.54  | -1.14 | -0.03 | -0.51 | -0.06 |
| -0.62 | -0.70 | -0.52 | -1.35 | 0.82  | 0.15  | -0.84 |
| 1.22  | -1.01 | 0.94  | -1.76 | 0.97  | -0.66 | -1.04 |
| -0.68 | -0.64 | -0.28 | 1.72  | 0.38  | 0.51  | 1.23  |
| -0.54 | -0.50 | -0.65 | 0.68  | -0.17 | 0.44  | 0.93  |
| -0.47 | -0.26 | -0.85 | 2.17  | -0.69 | 0.12  | -0.42 |
| -0.49 | -0.30 | -0.32 | 0.81  | -0.39 | 0.95  | 1.56  |
| 0.11  | -0.64 | 0.76  | 0.28  | -0.74 | 0.57  | 0.27  |
| -0.55 | -0.45 | 0.11  | -0.14 | 3.65  | 1.77  | -0.07 |
| -0.53 | -1.23 | -1.13 | -1.27 | 6.22  | -0.59 | -1.45 |
| 0.09  | 0.19  | -0.32 | 1.37  | -0.61 | 1.03  | 2.03  |
| -0.33 | -0.09 | 0.13  | 0.08  | -0.63 | 0.86  | 1.79  |



|       |       |       |       |       |       |       |
|-------|-------|-------|-------|-------|-------|-------|
| -0.59 | -0.10 | -0.35 | 0.35  | -0.67 | 0.11  | 0.40  |
| -0.36 | -0.61 | -0.05 | -1.26 | 0.24  | -0.71 | 0.69  |
| -0.16 | 0.04  | -0.26 | 0.86  | -0.64 | 0.13  | 1.11  |
| -0.25 | -1.22 | 0.02  | -1.51 | 5.00  | -0.71 | -1.58 |
| -0.68 | -0.68 | -0.10 | -1.07 | -0.68 | -1.01 | -0.23 |
| 0.45  | 1.11  | 1.75  | -0.18 | -0.77 | -0.55 | 1.56  |
| -0.64 | -1.08 | -0.88 | -1.18 | -0.18 | -0.84 | -1.16 |
| -1    | -1    | 0     | -1    | 0     | 0     | -1    |

---

| 40             | 41          | 42          | 43          | 44          | 45           | 46           |
|----------------|-------------|-------------|-------------|-------------|--------------|--------------|
| 102            | 92          | 85          | 13          | 34          | 70           | 103          |
| CAGTGC AATGATC | TACAGTATAGA | TTCACAGTGGC | TGAGGTAGTAG | TAGCTTATCAG | TATGGCACTGGT | AGGGGTGCTATC |
| miR-130b-3p    | miR-144-3p  | miR-27a-3p  | let-7g-5p   | miR-21-5p   | miR-183-5p   | miR-342-5p   |
| 26241.00       | 36676       | 49172       | 1899491     | 456843      | 75744        | 2.60E+04     |
| -1.01          | -0.20       | -0.47       | -0.70       | -0.20       | -0.38        | 0.47         |
| -2.02          | -0.32       | -1.07       | -1.21       | -0.24       | 4.86         | -1.27        |
| 0.01           | -0.24       | -0.11       | 0.87        | -0.29       | 0.04         | -0.50        |
| -0.74          | -0.25       | -0.59       | 1.05        | -0.33       | -0.03        | -0.89        |
| -0.64          | -0.22       | -0.27       | 2.12        | -0.04       | -0.18        | 1.39         |
| 0.55           | -0.23       | -0.61       | 0.23        | -0.25       | -0.40        | 1.06         |
| -0.75          | -0.28       | -0.80       | 1.39        | -0.18       | -0.40        | 0.53         |
| -0.71          | -0.12       | -0.87       | -1.39       | -0.32       | -0.37        | -0.48        |
| -1.10          | -0.25       | -0.62       | -1.02       | -0.36       | 0.14         | -1.25        |
| -1.20          | -0.19       | -0.49       | -0.32       | -0.26       | 0.41         | -0.68        |
| -0.03          | -0.29       | 0.90        | -0.92       | -0.18       | 0.32         | -0.54        |
| -1.43          | -0.31       | -1.03       | -0.13       | -0.32       | -0.40        | 2.99         |
| 1.17           | 0.13        | 2.19        | 2.52        | 4.83        | -0.36        | -0.39        |
| -0.90          | -0.24       | -1.02       | -1.23       | -0.34       | -0.29        | 0.06         |
| -0.34          | 0.07        | -0.14       | -0.31       | -0.27       | -0.13        | -0.67        |
| 1.65           | -0.04       | 0.90        | 0.39        | 0.23        | -0.19        | -0.05        |
| 0.94           | -0.25       | 0.38        | -0.89       | -0.32       | -0.27        | 0.32         |
| 1.53           | -0.27       | -0.21       | -0.57       | -0.12       | -0.37        | -0.47        |
| 1.22           | -0.30       | 0.50        | -0.93       | -0.16       | 0.07         | -0.87        |
| 0.92           | 4.95        | 2.05        | 0.28        | 0.96        | -0.29        | -0.85        |
| 0.42           | -0.10       | -0.82       | 0.86        | -0.26       | -0.19        | 0.02         |
| 0.53           | -0.31       | -0.56       | 0.21        | -0.34       | -0.36        | 0.40         |
| 1.29           | -0.27       | -0.57       | 0.30        | -0.25       | -0.37        | 0.67         |
| -0.50          | -0.23       | -0.66       | -0.56       | -0.30       | -0.39        | 1.27         |
| -0.16          | -0.21       | 0.35        | -0.51       | -0.30       | -0.33        | -0.57        |
| 0.61           | -0.30       | 1.65        | 0.09        | -0.27       | -0.30        | 1.44         |
| 0.71           | 0.27        | 2.00        | 0.35        | -0.12       | 0.20         | -1.13        |
| -0.59          | 9.91        | 2.55        | 1.60        | 2.49        | -0.05        | -1.04        |
| -0.22          | -0.30       | 1.41        | 0.14        | 0.21        | -0.13        | -0.04        |
| -1.33          | -0.27       | 0.42        | -1.15       | -0.27       | 1.30         | -1.27        |
| -1.54          | -0.21       | -0.30       | -1.33       | -0.34       | 2.34         | -1.36        |
| 0.11           | -0.32       | 5.02        | -0.25       | 0.11        | 1.93         | -1.30        |
| 0.17           | -0.14       | 0.29        | 1.21        | -0.10       | -0.33        | -0.41        |
| -1.22          | -0.25       | -0.38       | -1.15       | -0.10       | -0.35        | -1.09        |
| -1.11          | -0.13       | -0.26       | -1.28       | 0.04        | -0.20        | -0.93        |
| -0.28          | -0.20       | -0.47       | 1.05        | -0.27       | -0.39        | 1.26         |
| -1.58          | -0.18       | -1.23       | -1.74       | -0.38       | -0.40        | -0.25        |
| 0.10           | -0.15       | -0.75       | 0.71        | 0.28        | -0.39        | -0.68        |
| -0.53          | 0.18        | 2.20        | 0.68        | 1.61        | -0.26        | -0.64        |

|       |       |       |       |       |       |       |
|-------|-------|-------|-------|-------|-------|-------|
| -0.10 | -0.29 | -0.28 | -0.09 | -0.21 | -0.36 | 0.68  |
| -1.16 | -0.13 | 0.05  | -0.79 | -0.15 | -0.34 | 3.48  |
| -0.32 | 0.23  | 4.71  | -0.29 | -0.14 | -0.40 | 13.87 |
| 0.23  | -0.14 | -0.35 | -0.36 | -0.33 | -0.32 | 0.03  |
| 0.26  | -0.17 | 0.80  | 0.49  | 0.72  | -0.21 | -1.02 |
| -0.40 | -0.29 | -0.99 | -1.55 | -0.32 | -0.35 | 0.08  |
| -1.07 | -0.16 | -0.92 | -1.30 | -0.31 | -0.37 | 5.20  |
| 3.27  | -0.22 | 3.52  | 0.09  | -0.19 | -0.20 | -0.58 |
| 1.53  | -0.24 | -0.23 | -0.26 | -0.23 | -0.37 | 0.21  |
| 0.95  | -0.06 | -0.70 | -0.88 | -0.29 | -0.21 | -0.80 |
| 1.47  | -0.23 | -0.32 | -0.56 | -0.32 | -0.28 | 0.00  |
| 1.40  | -0.18 | -0.36 | -0.43 | -0.23 | -0.28 | -0.46 |
| 1.56  | -0.23 | 0.62  | -0.02 | -0.29 | -0.25 | 0.24  |
| 1.66  | -0.17 | -0.28 | -0.40 | -0.30 | -0.14 | -0.88 |
| 1.87  | -0.26 | 0.64  | 1.27  | -0.17 | -0.33 | 0.22  |
| 0.37  | -0.27 | -0.45 | -0.09 | -0.30 | -0.19 | 0.27  |
| 1.43  | -0.26 | 0.31  | -0.95 | -0.34 | -0.31 | -0.41 |
| -0.19 | -0.24 | -0.35 | 0.74  | -0.30 | -0.10 | -0.31 |
| 0.44  | 8.69  | 2.32  | 2.98  | 1.96  | -0.27 | -0.59 |
| 1.03  | -0.28 | -0.62 | 1.44  | -0.32 | -0.37 | 1.55  |
| 2.11  | -0.24 | 1.06  | 2.98  | 0.00  | -0.35 | 1.19  |
| 0.31  | -0.19 | 0.43  | 2.87  | -0.12 | -0.34 | 1.42  |
| 0.84  | 8.22  | 1.39  | 1.90  | 0.79  | -0.21 | -1.03 |
| 0.09  | -0.06 | -0.05 | -0.78 | -0.36 | -0.19 | -0.46 |
| 0.35  | -0.19 | -0.22 | 0.82  | -0.28 | -0.25 | 0.77  |
| 1.18  | -0.14 | 0.57  | 1.59  | -0.33 | -0.24 | -0.82 |
| -1.80 | -0.24 | -0.64 | 1.66  | -0.14 | -0.32 | -0.42 |
| -0.14 | -0.17 | 0.46  | -0.52 | 0.24  | 0.08  | -0.86 |
| -1.52 | -0.32 | 1.34  | -1.08 | -0.19 | 1.32  | -1.35 |
| -0.46 | -0.17 | -0.65 | 5.24  | -0.28 | -0.22 | 0.17  |
| 0.53  | -0.26 | 0.81  | 2.97  | -0.02 | -0.16 | 0.06  |
| -0.93 | -0.23 | -0.69 | 0.67  | -0.27 | -0.31 | -0.63 |
| 2.17  | -0.21 | -0.67 | 2.51  | 0.34  | -0.40 | -1.04 |
| 0.17  | -0.12 | -0.61 | 1.06  | -0.21 | -0.12 | -0.56 |
| -0.85 | -0.16 | -0.59 | 0.47  | -0.01 | -0.29 | -0.28 |
| -1.79 | 0.07  | -0.77 | -1.64 | -0.38 | -0.38 | 9.27  |
| -0.15 | -0.13 | -0.41 | 2.20  | 0.04  | -0.37 | 0.48  |
| -0.37 | -0.30 | 0.50  | -0.62 | -0.24 | 0.25  | -0.66 |
| 0.94  | -0.27 | -0.48 | -1.17 | -0.25 | 0.09  | 0.54  |
| 0.65  | 0.30  | 6.11  | 0.70  | -0.03 | 0.01  | -1.02 |
| 4.04  | -0.20 | 3.61  | -0.03 | -0.19 | 0.00  | -0.93 |
| 2.05  | -0.22 | 1.01  | -1.44 | -0.35 | 0.25  | -1.03 |
| 2.34  | -0.10 | 1.84  | 1.86  | -0.24 | -0.19 | -0.25 |
| 0.81  | -0.21 | -0.68 | -1.43 | -0.30 | -0.40 | 1.02  |
| 0.65  | 6.69  | 2.04  | 0.48  | 2.02  | -0.31 | -0.24 |
| -0.16 | 14.75 | 1.47  | 1.91  | 1.76  | -0.28 | -1.20 |
| 1.18  | -0.24 | 0.64  | -1.26 | -0.34 | -0.38 | -0.47 |
| 1.92  | -0.19 | 1.13  | 0.76  | -0.27 | -0.29 | -0.43 |
| 0.47  | -0.16 | 0.04  | 0.21  | -0.33 | -0.03 | -0.35 |
| 2.20  | -0.28 | 0.14  | 0.31  | 0.25  | -0.13 | -0.85 |
| 1.93  | -0.22 | 0.89  | -0.10 | -0.29 | -0.20 | -0.21 |
| -0.78 | -0.27 | 0.94  | 7.32  | 0.22  | -0.26 | -0.69 |
| -0.42 | -0.28 | -0.38 | -0.21 | -0.29 | -0.25 | -0.65 |
| 1.07  | -0.29 | 0.34  | 0.37  | -0.26 | -0.37 | 0.37  |
| -0.45 | -0.21 | 2.05  | 0.28  | -0.27 | 0.23  | -1.25 |
| -0.03 | -0.08 | 0.45  | 1.22  | -0.06 | 0.14  | -0.03 |
| 0.11  | 0.12  | 0.13  | 0.13  | 0.14  | 0.15  | 0.16  |
| 0.05  | 0.32  | 0.20  | 0.05  | 1.00  | 0.28  | 0.08  |











































































































































































|        |         |         |         |         |         |         |
|--------|---------|---------|---------|---------|---------|---------|
| 239935 | 1893208 | 1240451 | 2304775 | 1597470 | 1583268 | 2592561 |
| 50     | 51      | 52      | 53      | 54      | 55      | 56      |
| 20     | 21      | 22      | 23      | 24      | 25      | 26      |
| D_9    | E_20    | E_29    | E_4     | E_5     | E_6     | F_1     |
| CHR_NP | CHR_NP  | CHR_NP  | CHR_NP  | CHR_NP  | CHR_NP  | CHR_NP  |
| 971042 | 2600064 | 2094850 | 4830515 | 2551385 | 2616413 | 3930264 |
| 0.92   | 0.68    | 0.29    | 0.24    | 0.49    | 0.84    | 1.00    |
| D_9    | E_20    | E_29    | E_4     | E_5     | E_6     | F_1     |
| 731107 | 706856  | 854399  | 2525740 | 953915  | 1033145 | 1337703 |
| 122679 | 389983  | 434200  | 899048  | 539941  | 452076  | 1019114 |
| 4360   | 256917  | 87950   | 162314  | 99635   | 107343  | 314034  |
| 12343  | 135742  | 104686  | 168898  | 264828  | 202140  | 216370  |
| 2068   | 88459   | 83637   | 78820   | 66480   | 55579   | 193721  |
| 39570  | 121914  | 149724  | 164506  | 138176  | 149924  | 132168  |
| 1297   | 138924  | 19072   | 128682  | 43150   | 101571  | 22591   |
| 6148   | 189457  | 55740   | 89051   | 77544   | 75208   | 90366   |
| 453    | 18376   | 3407    | 35682   | 9097    | 19477   | 2885    |
| 1444   | 60543   | 20112   | 79855   | 30750   | 66644   | 21216   |
| 949    | 33423   | 16296   | 33869   | 20533   | 25326   | 33662   |
| 4340   | 14649   | 11862   | 19996   | 11806   | 16643   | 37442   |
| 2892   | 33311   | 26726   | 63887   | 34432   | 40006   | 45021   |
| 966    | 21311   | 11884   | 14690   | 12897   | 13780   | 28108   |
| 5265   | 10244   | 11251   | 23877   | 14905   | 12339   | 28906   |
| 146    | 12249   | 5069    | 11310   | 3826    | 8625    | 3619    |
| 4360   | 14452   | 19783   | 30744   | 21105   | 13046   | 29277   |
| 165    | 16723   | 3485    | 9674    | 4982    | 9159    | 5221    |
| 794    | 12614   | 9448    | 22251   | 11358   | 15361   | 16006   |
| 172    | 20440   | 4826    | 16228   | 8451    | 11039   | 8233    |
| 1368   | 15097   | 12160   | 9087    | 10001   | 8617    | 19882   |
| 832    | 10639   | 7806    | 8818    | 11595   | 7424    | 13305   |
| 295    | 6410    | 4200    | 9798    | 5656    | 6032    | 10784   |
| 89     | 11806   | 6426    | 5072    | 3364    | 3884    | 13575   |
| 74     | 30945   | 4146    | 12014   | 4908    | 4100    | 6108    |
| 181    | 12014   | 2145    | 3273    | 3201    | 5623    | 2676    |
| 491    | 10595   | 5810    | 12898   | 10754   | 8504    | 15410   |
| 3164   | 3971    | 6324    | 8727    | 6129    | 4824    | 16793   |
| 225    | 4317    | 1897    | 9309    | 3090    | 3810    | 1751    |
| 306    | 11047   | 4712    | 9403    | 5156    | 6291    | 11932   |
| 1144   | 8071    | 6087    | 5189    | 3944    | 6196    | 22369   |
| 173    | 15625   | 5490    | 15629   | 9462    | 9551    | 4731    |
| 311    | 5170    | 5106    | 4727    | 4324    | 3085    | 8943    |
| 211    | 8030    | 1759    | 4918    | 2963    | 4434    | 2540    |
| 117    | 2224    | 1179    | 1443    | 722     | 1495    | 1575    |
| 280    | 10370   | 4460    | 8887    | 4813    | 5923    | 11383   |
| 563    | 5536    | 3045    | 6668    | 3362    | 3311    | 6902    |
| 190    | 5926    | 3775    | 5773    | 2828    | 5461    | 5362    |
| 176    | 8080    | 1710    | 2449    | 2907    | 4450    | 4987    |
| 1015   | 3615    | 4264    | 3159    | 2550    | 655     | 13960   |
| 3700   | 3582    | 2940    | 2314    | 3146    | 1415    | 3960    |
| 2104   | 5684    | 4438    | 4198    | 3186    | 2075    | 6041    |
| 905    | 3620    | 3242    | 3567    | 5113    | 4677    | 3960    |
| 840    | 4933    | 2476    | 5529    | 3727    | 2842    | 6730    |
| 29     | 1420    | 336     | 1352    | 447     | 1157    | 341     |
| 212    | 4902    | 2611    | 3671    | 4984    | 4932    | 2963    |

|     |      |      |      |      |      |       |
|-----|------|------|------|------|------|-------|
| 210 | 5572 | 3584 | 4328 | 3568 | 3862 | 7118  |
| 243 | 4614 | 1861 | 2385 | 1755 | 3380 | 7296  |
| 744 | 1477 | 3362 | 4775 | 2856 | 2302 | 4118  |
| 23  | 338  | 162  | 616  | 238  | 324  | 192   |
| 51  | 3054 | 1345 | 1917 | 1056 | 961  | 742   |
| 311 | 2097 | 2013 | 605  | 2139 | 3436 | 17555 |
| 69  | 3858 | 1336 | 2036 | 1369 | 1445 | 2132  |
| 855 | 1586 | 1244 | 2444 | 1628 | 1537 | 3421  |
| 17  | 2990 | 1379 | 1240 | 1017 | 892  | 1714  |
| 477 | 2996 | 1905 | 1145 | 2342 | 1151 | 2854  |
| 13  | 247  | 111  | 382  | 144  | 292  | 154   |
| 116 | 2901 | 835  | 2672 | 1736 | 1442 | 2190  |
| 43  | 3742 | 2007 | 2472 | 2808 | 1498 | 1234  |
| 81  | 1716 | 988  | 1041 | 2131 | 1524 | 3269  |
| 168 | 2103 | 660  | 2449 | 982  | 1044 | 3947  |
| 158 | 1268 | 1255 | 1628 | 882  | 1673 | 3917  |
| 137 | 1917 | 1288 | 1637 | 1766 | 1312 | 894   |
| 11  | 394  | 49   | 481  | 66   | 408  | 193   |
| 22  | 463  | 83   | 204  | 182  | 169  | 162   |
| 158 | 375  | 991  | 2321 | 924  | 817  | 889   |
| 43  | 1159 | 357  | 1198 | 641  | 1102 | 773   |
| 19  | 962  | 450  | 1277 | 617  | 1420 | 495   |
| 24  | 516  | 139  | 671  | 271  | 586  | 321   |
| 117 | 1805 | 550  | 1314 | 924  | 1020 | 1142  |
| 33  | 1023 | 176  | 1219 | 552  | 550  | 1102  |
| 276 | 1048 | 1071 | 1559 | 846  | 907  | 2058  |
| 210 | 379  | 532  | 1490 | 755  | 691  | 1163  |
| 5   | 501  | 159  | 354  | 92   | 329  | 162   |
| 31  | 633  | 375  | 992  | 682  | 722  | 977   |
| 15  | 3022 | 643  | 1094 | 1412 | 1097 | 1119  |
| 90  | 423  | 988  | 238  | 734  | 1217 | 4399  |
| 238 | 1196 | 593  | 967  | 776  | 646  | 1496  |
| 66  | 921  | 242  | 714  | 277  | 349  | 2328  |
| 257 | 446  | 743  | 867  | 529  | 508  | 1474  |
| 33  | 616  | 697  | 859  | 424  | 988  | 2117  |
| 22  | 1099 | 316  | 825  | 620  | 644  | 478   |
| 228 | 646  | 794  | 1116 | 857  | 692  | 1845  |
| 67  | 526  | 571  | 923  | 583  | 485  | 1575  |
| 2   | 435  | 474  | 213  | 285  | 449  | 384   |
| 18  | 1648 | 250  | 272  | 298  | 282  | 920   |
| 421 | 671  | 482  | 839  | 547  | 646  | 1285  |
| 389 | 477  | 668  | 1088 | 565  | 552  | 1561  |
| 7   | 537  | 116  | 823  | 186  | 557  | 106   |
| 7   | 996  | 476  | 842  | 593  | 601  | 622   |
| 67  | 674  | 325  | 306  | 209  | 213  | 1078  |
| 60  | 651  | 464  | 429  | 381  | 918  | 693   |
| 6   | 28   | 15   | 97   | 23   | 36   | 36    |
| 67  | 967  | 382  | 1112 | 629  | 374  | 640   |
| 2   | 572  | 212  | 1030 | 339  | 996  | 490   |
| 10  | 333  | 78   | 348  | 121  | 219  | 84    |
| 26  | 642  | 259  | 492  | 448  | 482  | 196   |
| 96  | 306  | 494  | 418  | 305  | 293  | 877   |
| 124 | 312  | 511  | 626  | 344  | 285  | 517   |
| 118 | 404  | 357  | 350  | 428  | 350  | 727   |
| 1   | 172  | 34   | 218  | 47   | 173  | 58    |
| 142 | 260  | 169  | 277  | 188  | 191  | 683   |
| 17  | 749  | 334  | 525  | 427  | 412  | 703   |
| 233 | 277  | 324  | 271  | 373  | 262  | 690   |
| 4   | 310  | 111  | 220  | 147  | 240  | 251   |



|     |     |     |     |     |     |     |
|-----|-----|-----|-----|-----|-----|-----|
| 13  | 291 | 87  | 432 | 137 | 291 | 117 |
| 2   | 133 | 52  | 171 | 82  | 135 | 69  |
| 282 | 422 | 296 | 537 | 302 | 315 | 655 |
| 10  | 811 | 290 | 369 | 295 | 297 | 449 |
| 20  | 249 | 99  | 315 | 145 | 247 | 181 |
| 71  | 164 | 118 | 281 | 130 | 238 | 132 |
| 1   | 392 | 231 | 454 | 348 | 524 | 163 |
| 45  | 308 | 247 | 330 | 477 | 272 | 542 |
| 55  | 272 | 152 | 309 | 141 | 135 | 382 |
| 6   | 186 | 40  | 184 | 103 | 179 | 94  |
| 19  | 226 | 272 | 246 | 500 | 337 | 362 |
| 6   | 135 | 217 | 140 | 98  | 123 | 596 |
| 9   | 266 | 133 | 223 | 144 | 226 | 119 |
| 14  | 309 | 136 | 304 | 113 | 351 | 286 |
| 14  | 309 | 136 | 304 | 113 | 351 | 286 |
| 5   | 170 | 80  | 208 | 109 | 118 | 203 |
| 111 | 177 | 117 | 427 | 228 | 194 | 233 |
| 6   | 189 | 196 | 362 | 254 | 278 | 176 |
| 5   | 362 | 243 | 90  | 355 | 632 | 386 |
| 3   | 240 | 186 | 249 | 160 | 148 | 121 |
| 3   | 65  | 22  | 42  | 26  | 45  | 33  |
| 29  | 123 | 171 | 309 | 193 | 109 | 316 |
| 125 | 250 | 83  | 120 | 161 | 103 | 368 |
| 12  | 206 | 172 | 274 | 247 | 261 | 310 |
| 59  | 208 | 105 | 158 | 106 | 149 | 628 |
| 40  | 184 | 145 | 171 | 112 | 85  | 313 |
| 34  | 106 | 38  | 88  | 67  | 48  | 453 |
| 13  | 190 | 122 | 208 | 120 | 208 | 156 |
| 0   | 269 | 78  | 164 | 73  | 203 | 368 |
| 118 | 201 | 99  | 162 | 115 | 113 | 339 |
| 27  | 208 | 75  | 92  | 72  | 116 | 95  |
| 16  | 207 | 108 | 122 | 114 | 110 | 268 |
| 16  | 157 | 66  | 182 | 112 | 85  | 107 |
| 26  | 78  | 83  | 308 | 142 | 132 | 97  |
| 0   | 208 | 77  | 173 | 113 | 153 | 215 |
| 30  | 185 | 88  | 212 | 120 | 143 | 302 |
| 34  | 195 | 145 | 141 | 124 | 100 | 191 |
| 5   | 197 | 84  | 256 | 134 | 111 | 184 |
| 82  | 81  | 79  | 157 | 82  | 90  | 123 |
| 12  | 236 | 91  | 135 | 113 | 93  | 193 |
| 1   | 14  | 2   | 24  | 7   | 15  | 18  |
| 18  | 38  | 66  | 214 | 97  | 93  | 90  |
| 8   | 125 | 119 | 176 | 160 | 55  | 153 |
| 1   | 347 | 125 | 212 | 121 | 158 | 98  |
| 11  | 99  | 37  | 154 | 54  | 69  | 93  |
| 68  | 87  | 70  | 155 | 125 | 101 | 149 |
| 7   | 109 | 37  | 68  | 48  | 51  | 62  |
| 2   | 76  | 32  | 86  | 58  | 92  | 31  |
| 1   | 99  | 81  | 36  | 119 | 278 | 193 |
| 11  | 149 | 92  | 143 | 97  | 35  | 159 |
| 3   | 93  | 108 | 137 | 399 | 120 | 22  |
| 32  | 47  | 50  | 143 | 61  | 59  | 116 |
| 6   | 62  | 38  | 36  | 41  | 30  | 134 |
| 29  | 49  | 78  | 122 | 58  | 226 | 314 |
| 16  | 73  | 51  | 135 | 133 | 109 | 158 |
| 28  | 32  | 48  | 159 | 57  | 55  | 112 |
| 0   | 24  | 4   | 11  | 12  | 9   | 19  |
| 38  | 113 | 53  | 87  | 49  | 53  | 147 |
| 39  | 91  | 74  | 122 | 76  | 60  | 155 |

|    |     |     |     |     |     |     |
|----|-----|-----|-----|-----|-----|-----|
| 1  | 93  | 20  | 52  | 33  | 46  | 48  |
| 6  | 248 | 44  | 69  | 30  | 43  | 63  |
| 25 | 48  | 81  | 166 | 73  | 56  | 96  |
| 1  | 116 | 68  | 95  | 118 | 69  | 241 |
| 77 | 31  | 50  | 22  | 35  | 57  | 30  |
| 1  | 79  | 15  | 79  | 40  | 82  | 35  |
| 5  | 43  | 31  | 125 | 54  | 69  | 50  |
| 40 | 207 | 90  | 137 | 103 | 55  | 157 |
| 18 | 50  | 30  | 85  | 33  | 52  | 77  |
| 6  | 67  | 71  | 54  | 53  | 70  | 127 |
| 4  | 110 | 38  | 79  | 49  | 74  | 89  |
| 1  | 128 | 31  | 69  | 16  | 35  | 35  |
| 87 | 45  | 114 | 57  | 68  | 22  | 81  |
| 7  | 28  | 67  | 48  | 43  | 114 | 413 |
| 4  | 72  | 42  | 90  | 45  | 102 | 68  |
| 14 | 59  | 39  | 78  | 68  | 45  | 120 |
| 33 | 42  | 57  | 29  | 53  | 104 | 338 |
| 9  | 63  | 0   | 76  | 41  | 53  | 143 |
| 0  | 69  | 16  | 66  | 21  | 22  | 22  |
| 28 | 16  | 60  | 25  | 61  | 99  | 641 |
| 1  | 120 | 17  | 115 | 42  | 83  | 13  |
| 8  | 30  | 47  | 84  | 32  | 66  | 351 |
| 34 | 53  | 49  | 64  | 64  | 45  | 84  |
| 0  | 67  | 14  | 62  | 21  | 21  | 21  |
| 9  | 27  | 51  | 13  | 58  | 101 | 409 |
| 17 | 67  | 45  | 134 | 72  | 99  | 117 |
| 2  | 88  | 24  | 29  | 30  | 35  | 169 |
| 2  | 9   | 7   | 130 | 52  | 105 | 366 |
| 0  | 55  | 11  | 45  | 26  | 55  | 4   |
| 0  | 64  | 35  | 71  | 44  | 73  | 103 |
| 7  | 69  | 66  | 109 | 40  | 21  | 71  |
| 4  | 33  | 17  | 42  | 14  | 36  | 261 |
| 10 | 63  | 60  | 39  | 37  | 38  | 94  |
| 0  | 62  | 14  | 25  | 20  | 33  | 12  |
| 10 | 18  | 29  | 119 | 50  | 47  | 31  |
| 20 | 40  | 34  | 57  | 33  | 61  | 84  |
| 9  | 91  | 45  | 55  | 75  | 30  | 33  |
| 26 | 109 | 66  | 22  | 62  | 20  | 77  |
| 2  | 49  | 38  | 63  | 43  | 75  | 37  |
| 22 | 53  | 35  | 31  | 22  | 24  | 97  |
| 9  | 39  | 49  | 62  | 28  | 26  | 125 |
| 0  | 24  | 6   | 41  | 10  | 37  | 12  |
| 21 | 53  | 59  | 26  | 74  | 104 | 327 |
| 22 | 36  | 29  | 56  | 37  | 33  | 46  |
| 0  | 52  | 33  | 85  | 51  | 48  | 80  |
| 4  | 42  | 35  | 77  | 43  | 120 | 120 |
| 14 | 16  | 21  | 56  | 37  | 23  | 38  |
| 14 | 95  | 51  | 48  | 47  | 47  | 109 |
| 7  | 88  | 32  | 61  | 57  | 37  | 52  |
| 0  | 60  | 10  | 13  | 27  | 80  | 67  |
| 21 | 20  | 26  | 49  | 29  | 53  | 61  |
| 6  | 42  | 31  | 85  | 31  | 55  | 44  |
| 21 | 73  | 32  | 37  | 34  | 38  | 78  |
| 3  | 97  | 34  | 48  | 46  | 38  | 87  |
| 0  | 63  | 29  | 19  | 30  | 25  | 18  |
| 0  | 5   | 0   | 7   | 1   | 3   | 0   |
| 1  | 40  | 12  | 28  | 36  | 24  | 29  |
| 0  | 9   | 11  | 6   | 5   | 11  | 6   |
| 15 | 18  | 20  | 83  | 25  | 24  | 37  |

|    |     |    |     |    |     |     |
|----|-----|----|-----|----|-----|-----|
| 2  | 68  | 20 | 33  | 51 | 34  | 55  |
| 16 | 14  | 14 | 48  | 16 | 31  | 40  |
| 0  | 46  | 21 | 21  | 62 | 159 | 96  |
| 10 | 28  | 37 | 26  | 51 | 21  | 61  |
| 19 | 24  | 33 | 24  | 32 | 11  | 45  |
| 6  | 12  | 16 | 130 | 28 | 34  | 50  |
| 8  | 39  | 20 | 31  | 16 | 21  | 102 |
| 4  | 36  | 10 | 28  | 23 | 28  | 35  |
| 2  | 37  | 16 | 26  | 5  | 33  | 25  |
| 7  | 27  | 32 | 29  | 13 | 18  | 47  |
| 0  | 17  | 1  | 6   | 1  | 4   | 6   |
| 15 | 22  | 16 | 36  | 19 | 29  | 90  |
| 1  | 54  | 8  | 47  | 37 | 45  | 43  |
| 13 | 8   | 17 | 44  | 42 | 14  | 26  |
| 14 | 31  | 16 | 19  | 39 | 19  | 44  |
| 0  | 47  | 6  | 9   | 5  | 12  | 27  |
| 1  | 52  | 11 | 18  | 11 | 18  | 14  |
| 7  | 37  | 24 | 55  | 27 | 27  | 48  |
| 6  | 17  | 17 | 7   | 13 | 49  | 111 |
| 4  | 35  | 9  | 26  | 26 | 15  | 39  |
| 1  | 27  | 5  | 10  | 7  | 15  | 2   |
| 2  | 101 | 17 | 41  | 25 | 22  | 22  |
| 2  | 101 | 17 | 41  | 25 | 22  | 22  |
| 9  | 10  | 13 | 12  | 19 | 47  | 209 |
| 11 | 26  | 25 | 32  | 13 | 16  | 35  |
| 5  | 35  | 11 | 16  | 15 | 14  | 36  |
| 2  | 37  | 23 | 12  | 50 | 74  | 101 |
| 0  | 59  | 15 | 31  | 25 | 24  | 22  |
| 7  | 35  | 10 | 45  | 31 | 14  | 26  |
| 6  | 24  | 6  | 20  | 9  | 17  | 25  |
| 0  | 28  | 3  | 19  | 22 | 22  | 10  |
| 9  | 27  | 17 | 18  | 48 | 18  | 42  |
| 1  | 64  | 15 | 39  | 24 | 12  | 5   |
| 0  | 81  | 14 | 7   | 15 | 4   | 90  |
| 2  | 18  | 24 | 41  | 23 | 32  | 17  |
| 3  | 30  | 8  | 18  | 17 | 22  | 28  |
| 1  | 4   | 0  | 1   | 1  | 1   | 4   |
| 1  | 17  | 10 | 38  | 21 | 24  | 22  |
| 1  | 55  | 5  | 29  | 16 | 11  | 11  |
| 12 | 25  | 33 | 14  | 9  | 8   | 38  |
| 10 | 11  | 12 | 36  | 16 | 16  | 21  |
| 1  | 52  | 5  | 28  | 15 | 11  | 11  |
| 4  | 14  | 6  | 32  | 8  | 3   | 47  |
| 6  | 24  | 17 | 27  | 13 | 22  | 70  |
| 1  | 17  | 6  | 17  | 14 | 35  | 18  |
| 6  | 9   | 9  | 35  | 10 | 20  | 23  |
| 0  | 0   | 0  | 0   | 3  | 1   | 0   |
| 25 | 12  | 21 | 7   | 31 | 12  | 18  |
| 12 | 14  | 14 | 29  | 7  | 13  | 15  |
| 4  | 6   | 9  | 27  | 11 | 1   | 26  |
| 3  | 14  | 19 | 12  | 15 | 25  | 97  |
| 0  | 31  | 8  | 22  | 23 | 25  | 9   |
| 0  | 1   | 0  | 3   | 3  | 1   | 1   |
| 2  | 20  | 3  | 19  | 18 | 14  | 28  |
| 0  | 16  | 4  | 26  | 12 | 22  | 6   |
| 0  | 0   | 0  | 0   | 0  | 0   | 0   |
| 11 | 14  | 11 | 10  | 8  | 14  | 16  |
| 2  | 13  | 5  | 10  | 9  | 4   | 20  |
| 10 | 23  | 5  | 13  | 10 | 8   | 36  |

|    |    |    |    |    |    |     |
|----|----|----|----|----|----|-----|
| 8  | 8  | 24 | 7  | 14 | 18 | 82  |
| 0  | 13 | 17 | 14 | 12 | 16 | 27  |
| 2  | 9  | 15 | 3  | 16 | 30 | 101 |
| 4  | 16 | 14 | 19 | 15 | 3  | 14  |
| 7  | 16 | 30 | 22 | 20 | 16 | 45  |
| 8  | 13 | 22 | 16 | 8  | 14 | 38  |
| 0  | 15 | 4  | 24 | 12 | 19 | 5   |
| 0  | 12 | 8  | 5  | 28 | 42 | 48  |
| 0  | 6  | 2  | 11 | 1  | 1  | 0   |
| 0  | 18 | 6  | 17 | 1  | 14 | 4   |
| 0  | 21 | 9  | 3  | 6  | 7  | 15  |
| 4  | 11 | 11 | 20 | 18 | 8  | 29  |
| 3  | 12 | 6  | 10 | 5  | 7  | 14  |
| 3  | 6  | 20 | 32 | 49 | 12 | 3   |
| 8  | 10 | 11 | 10 | 20 | 28 | 106 |
| 0  | 16 | 7  | 18 | 6  | 19 | 3   |
| 0  | 6  | 6  | 10 | 8  | 9  | 38  |
| 16 | 13 | 6  | 10 | 13 | 9  | 19  |
| 5  | 12 | 11 | 14 | 20 | 23 | 22  |
| 0  | 11 | 1  | 11 | 17 | 70 | 11  |
| 2  | 11 | 16 | 7  | 17 | 18 | 85  |
| 2  | 19 | 11 | 21 | 17 | 10 | 25  |
| 11 | 8  | 17 | 16 | 8  | 12 | 25  |
| 4  | 1  | 7  | 18 | 6  | 7  | 6   |
| 0  | 11 | 11 | 13 | 7  | 23 | 11  |
| 5  | 10 | 9  | 18 | 14 | 11 | 9   |
| 7  | 11 | 12 | 16 | 15 | 17 | 11  |
| 10 | 7  | 9  | 14 | 8  | 8  | 33  |
| 4  | 13 | 10 | 9  | 7  | 5  | 18  |
| 1  | 16 | 10 | 14 | 10 | 24 | 14  |
| 2  | 8  | 9  | 13 | 10 | 10 | 26  |
| 0  | 10 | 3  | 5  | 4  | 7  | 2   |
| 0  | 18 | 2  | 7  | 1  | 5  | 6   |
| 0  | 9  | 5  | 10 | 7  | 7  | 4   |
| 0  | 13 | 4  | 10 | 3  | 6  | 17  |
| 8  | 3  | 8  | 9  | 8  | 5  | 9   |
| 1  | 6  | 14 | 11 | 6  | 3  | 29  |
| 3  | 12 | 7  | 12 | 8  | 24 | 18  |
| 1  | 14 | 11 | 18 | 12 | 6  | 13  |
| 3  | 12 | 15 | 8  | 10 | 8  | 25  |
| 1  | 15 | 6  | 2  | 2  | 7  | 4   |
| 1  | 8  | 7  | 6  | 11 | 8  | 12  |
| 5  | 13 | 10 | 6  | 18 | 16 | 81  |
| 4  | 9  | 9  | 14 | 6  | 7  | 27  |
| 0  | 25 | 7  | 6  | 19 | 25 | 38  |
| 2  | 7  | 5  | 16 | 9  | 5  | 1   |
| 3  | 5  | 7  | 13 | 8  | 7  | 20  |
| 0  | 4  | 4  | 12 | 2  | 8  | 6   |
| 12 | 9  | 3  | 9  | 4  | 5  | 14  |
| 1  | 16 | 6  | 3  | 16 | 2  | 7   |
| 10 | 10 | 5  | 20 | 7  | 10 | 17  |
| 0  | 8  | 1  | 1  | 5  | 2  | 4   |
| 3  | 9  | 8  | 13 | 8  | 6  | 17  |
| 0  | 22 | 1  | 11 | 5  | 15 | 4   |
| 2  | 14 | 3  | 9  | 8  | 5  | 9   |
| 0  | 10 | 9  | 8  | 10 | 13 | 14  |
| 2  | 7  | 11 | 17 | 5  | 8  | 16  |
| 1  | 5  | 0  | 2  | 4  | 0  | 33  |
| 2  | 8  | 9  | 10 | 8  | 18 | 10  |

|   |    |    |    |    |    |    |
|---|----|----|----|----|----|----|
| 1 | 6  | 5  | 7  | 4  | 9  | 5  |
| 1 | 13 | 9  | 9  | 5  | 7  | 10 |
| 0 | 8  | 3  | 9  | 10 | 7  | 18 |
| 1 | 5  | 7  | 16 | 7  | 7  | 9  |
| 4 | 10 | 17 | 18 | 7  | 0  | 8  |
| 1 | 18 | 0  | 14 | 5  | 7  | 19 |
| 3 | 6  | 4  | 14 | 8  | 4  | 3  |
| 0 | 6  | 1  | 2  | 4  | 6  | 8  |
| 0 | 11 | 3  | 7  | 7  | 7  | 5  |
| 0 | 15 | 8  | 9  | 5  | 11 | 8  |
| 3 | 9  | 5  | 15 | 5  | 4  | 16 |
| 4 | 13 | 7  | 12 | 6  | 8  | 5  |
| 0 | 4  | 7  | 2  | 2  | 0  | 3  |
| 0 | 2  | 2  | 0  | 0  | 3  | 1  |
| 4 | 24 | 5  | 9  | 2  | 4  | 3  |
| 0 | 3  | 0  | 7  | 10 | 4  | 4  |
| 0 | 10 | 3  | 9  | 6  | 8  | 8  |
| 3 | 7  | 4  | 10 | 5  | 9  | 16 |
| 0 | 13 | 1  | 4  | 1  | 16 | 7  |
| 3 | 12 | 1  | 4  | 3  | 2  | 6  |
| 0 | 10 | 5  | 3  | 4  | 5  | 9  |
| 0 | 10 | 2  | 11 | 6  | 1  | 2  |
| 0 | 10 | 7  | 4  | 8  | 4  | 20 |
| 2 | 5  | 6  | 4  | 4  | 6  | 11 |
| 3 | 6  | 5  | 7  | 2  | 6  | 2  |
| 0 | 4  | 6  | 6  | 5  | 5  | 17 |
| 0 | 8  | 1  | 7  | 3  | 4  | 1  |
| 2 | 7  | 2  | 3  | 1  | 1  | 2  |
| 0 | 6  | 1  | 9  | 7  | 3  | 13 |
| 0 | 15 | 7  | 12 | 2  | 8  | 5  |
| 5 | 5  | 5  | 3  | 1  | 14 | 26 |
| 0 | 6  | 5  | 4  | 3  | 3  | 10 |
| 1 | 18 | 5  | 2  | 3  | 5  | 8  |
| 2 | 2  | 6  | 5  | 9  | 5  | 3  |
| 0 | 5  | 2  | 2  | 2  | 1  | 1  |
| 1 | 3  | 5  | 3  | 9  | 7  | 26 |
| 0 | 5  | 1  | 7  | 7  | 3  | 7  |
| 4 | 1  | 1  | 2  | 4  | 1  | 12 |
| 2 | 3  | 7  | 2  | 3  | 3  | 9  |
| 0 | 5  | 3  | 9  | 4  | 3  | 10 |
| 3 | 11 | 3  | 0  | 3  | 1  | 5  |
| 0 | 8  | 5  | 0  | 3  | 8  | 4  |
| 0 | 4  | 6  | 4  | 6  | 6  | 32 |
| 0 | 8  | 2  | 6  | 0  | 1  | 8  |
| 1 | 5  | 2  | 6  | 6  | 1  | 10 |
| 2 | 4  | 2  | 6  | 6  | 4  | 4  |
| 0 | 14 | 6  | 8  | 3  | 4  | 2  |
| 1 | 0  | 5  | 5  | 2  | 5  | 9  |
| 0 | 7  | 2  | 26 | 7  | 3  | 0  |
| 0 | 3  | 3  | 7  | 0  | 0  | 4  |
| 4 | 2  | 4  | 7  | 1  | 2  | 4  |
| 0 | 7  | 6  | 2  | 5  | 18 | 11 |
| 1 | 6  | 1  | 3  | 2  | 5  | 5  |
| 1 | 10 | 2  | 8  | 4  | 2  | 6  |
| 0 | 12 | 5  | 7  | 4  | 8  | 13 |
| 0 | 3  | 2  | 3  | 1  | 1  | 0  |
| 1 | 7  | 5  | 2  | 5  | 6  | 7  |
| 1 | 6  | 3  | 5  | 6  | 1  | 5  |
| 0 | 6  | 15 | 5  | 12 | 0  | 4  |

|   |    |   |    |    |    |    |
|---|----|---|----|----|----|----|
| 0 | 5  | 0 | 4  | 5  | 4  | 1  |
| 2 | 11 | 6 | 3  | 1  | 1  | 10 |
| 0 | 6  | 1 | 7  | 4  | 2  | 0  |
| 0 | 5  | 1 | 8  | 1  | 4  | 1  |
| 3 | 6  | 3 | 1  | 4  | 2  | 10 |
| 0 | 1  | 0 | 6  | 1  | 4  | 20 |
| 2 | 3  | 5 | 7  | 2  | 4  | 10 |
| 1 | 11 | 3 | 2  | 4  | 1  | 3  |
| 3 | 5  | 3 | 8  | 3  | 3  | 11 |
| 0 | 61 | 4 | 6  | 4  | 0  | 7  |
| 0 | 1  | 0 | 1  | 0  | 1  | 0  |
| 0 | 1  | 0 | 0  | 0  | 0  | 2  |
| 0 | 0  | 0 | 1  | 0  | 1  | 0  |
| 0 | 7  | 0 | 3  | 3  | 2  | 4  |
| 1 | 4  | 3 | 3  | 7  | 6  | 3  |
| 1 | 9  | 8 | 7  | 3  | 6  | 11 |
| 1 | 1  | 1 | 9  | 2  | 5  | 3  |
| 0 | 0  | 5 | 4  | 1  | 6  | 11 |
| 0 | 1  | 0 | 1  | 0  | 1  | 0  |
| 0 | 5  | 1 | 0  | 3  | 13 | 4  |
| 0 | 2  | 1 | 1  | 3  | 5  | 17 |
| 0 | 8  | 0 | 3  | 0  | 2  | 3  |
| 0 | 1  | 1 | 5  | 1  | 3  | 8  |
| 1 | 2  | 4 | 1  | 3  | 3  | 8  |
| 0 | 1  | 1 | 6  | 3  | 1  | 7  |
| 0 | 0  | 1 | 0  | 2  | 1  | 0  |
| 2 | 4  | 4 | 2  | 12 | 4  | 10 |
| 0 | 2  | 1 | 4  | 0  | 3  | 2  |
| 0 | 3  | 3 | 4  | 4  | 1  | 5  |
| 1 | 9  | 1 | 4  | 2  | 6  | 7  |
| 0 | 3  | 0 | 2  | 0  | 2  | 0  |
| 0 | 5  | 2 | 5  | 3  | 9  | 6  |
| 1 | 2  | 3 | 6  | 6  | 3  | 4  |
| 2 | 2  | 2 | 3  | 2  | 1  | 2  |
| 0 | 3  | 0 | 2  | 7  | 5  | 3  |
| 1 | 5  | 1 | 4  | 2  | 0  | 9  |
| 2 | 5  | 7 | 3  | 4  | 0  | 5  |
| 1 | 0  | 4 | 9  | 3  | 3  | 2  |
| 0 | 6  | 1 | 8  | 3  | 3  | 6  |
| 0 | 1  | 5 | 0  | 1  | 3  | 7  |
| 0 | 0  | 0 | 0  | 0  | 1  | 2  |
| 0 | 7  | 2 | 6  | 1  | 0  | 4  |
| 0 | 1  | 1 | 7  | 1  | 2  | 8  |
| 0 | 4  | 2 | 6  | 3  | 4  | 7  |
| 0 | 2  | 2 | 6  | 4  | 2  | 2  |
| 0 | 7  | 3 | 0  | 0  | 9  | 5  |
| 0 | 2  | 0 | 2  | 1  | 4  | 1  |
| 2 | 1  | 1 | 3  | 5  | 1  | 3  |
| 5 | 2  | 3 | 2  | 2  | 0  | 4  |
| 1 | 1  | 2 | 0  | 1  | 1  | 3  |
| 0 | 5  | 2 | 1  | 1  | 5  | 5  |
| 0 | 5  | 2 | 2  | 0  | 3  | 2  |
| 0 | 1  | 1 | 4  | 0  | 6  | 5  |
| 1 | 3  | 1 | 5  | 0  | 0  | 2  |
| 0 | 4  | 2 | 5  | 8  | 4  | 3  |
| 0 | 7  | 1 | 2  | 2  | 0  | 0  |
| 0 | 6  | 1 | 3  | 1  | 0  | 3  |
| 2 | 0  | 3 | 5  | 2  | 1  | 6  |
| 3 | 3  | 2 | 11 | 1  | 2  | 5  |

|   |   |   |   |   |   |    |
|---|---|---|---|---|---|----|
| 0 | 3 | 4 | 5 | 8 | 1 | 3  |
| 1 | 0 | 5 | 2 | 2 | 1 | 4  |
| 0 | 2 | 4 | 1 | 6 | 2 | 1  |
| 2 | 1 | 2 | 1 | 2 | 1 | 3  |
| 0 | 4 | 4 | 2 | 1 | 4 | 4  |
| 1 | 1 | 0 | 0 | 0 | 1 | 0  |
| 1 | 1 | 1 | 2 | 3 | 2 | 6  |
| 1 | 1 | 0 | 2 | 1 | 3 | 3  |
| 1 | 1 | 3 | 2 | 1 | 0 | 5  |
| 0 | 5 | 2 | 0 | 0 | 2 | 3  |
| 0 | 1 | 0 | 4 | 0 | 0 | 8  |
| 1 | 2 | 0 | 8 | 0 | 1 | 5  |
| 0 | 4 | 0 | 1 | 1 | 2 | 1  |
| 2 | 2 | 3 | 1 | 2 | 2 | 1  |
| 0 | 1 | 0 | 4 | 2 | 3 | 0  |
| 0 | 4 | 2 | 1 | 5 | 2 | 4  |
| 0 | 5 | 4 | 2 | 0 | 0 | 5  |
| 0 | 2 | 0 | 1 | 0 | 1 | 17 |
| 0 | 0 | 0 | 1 | 0 | 0 | 0  |
| 2 | 6 | 2 | 3 | 2 | 0 | 1  |
| 0 | 2 | 1 | 3 | 3 | 1 | 1  |
| 0 | 1 | 0 | 0 | 0 | 0 | 0  |
| 0 | 2 | 0 | 1 | 0 | 1 | 0  |
| 0 | 4 | 1 | 3 | 1 | 0 | 1  |
| 3 | 3 | 1 | 1 | 1 | 1 | 4  |
| 0 | 4 | 0 | 3 | 0 | 3 | 3  |
| 1 | 3 | 3 | 4 | 2 | 1 | 4  |
| 1 | 2 | 2 | 5 | 2 | 2 | 8  |
| 0 | 0 | 0 | 1 | 0 | 0 | 1  |
| 0 | 0 | 0 | 0 | 0 | 0 | 0  |
| 0 | 2 | 0 | 2 | 2 | 4 | 2  |
| 0 | 2 | 0 | 0 | 0 | 2 | 5  |
| 0 | 0 | 2 | 2 | 1 | 0 | 1  |
| 0 | 1 | 0 | 6 | 0 | 0 | 2  |
| 0 | 2 | 0 | 3 | 0 | 0 | 4  |
| 0 | 2 | 0 | 0 | 1 | 2 | 1  |
| 7 | 0 | 2 | 0 | 1 | 1 | 1  |
| 0 | 3 | 2 | 0 | 1 | 2 | 2  |
| 0 | 4 | 1 | 0 | 1 | 5 | 6  |
| 0 | 0 | 2 | 1 | 1 | 3 | 1  |
| 0 | 0 | 0 | 0 | 0 | 2 | 0  |
| 0 | 0 | 0 | 3 | 0 | 2 | 9  |
| 0 | 6 | 3 | 0 | 5 | 0 | 3  |
| 1 | 2 | 2 | 2 | 3 | 0 | 6  |
| 1 | 1 | 3 | 2 | 1 | 0 | 4  |
| 0 | 1 | 1 | 2 | 1 | 0 | 0  |
| 1 | 1 | 0 | 1 | 0 | 1 | 4  |
| 0 | 0 | 0 | 1 | 0 | 0 | 1  |
| 0 | 0 | 0 | 2 | 1 | 1 | 1  |
| 0 | 0 | 0 | 2 | 0 | 1 | 5  |
| 0 | 1 | 0 | 3 | 2 | 3 | 1  |
| 0 | 1 | 0 | 1 | 0 | 0 | 0  |
| 0 | 1 | 0 | 2 | 0 | 1 | 0  |
| 0 | 0 | 0 | 5 | 3 | 0 | 1  |
| 0 | 0 | 0 | 4 | 1 | 1 | 1  |
| 0 | 1 | 0 | 1 | 0 | 3 | 0  |
| 0 | 0 | 3 | 2 | 3 | 4 | 6  |
| 2 | 3 | 0 | 1 | 4 | 3 | 2  |
| 1 | 0 | 1 | 1 | 2 | 2 | 2  |

|        |        |        |         |        |         |         |
|--------|--------|--------|---------|--------|---------|---------|
| 0      | 2      | 1      | 1       | 1      | 1       | 2       |
| 0      | 4      | 0      | 1       | 4      | 0       | 2       |
| 1      | 2      | 1      | 0       | 3      | 0       | 0       |
| 0      | 5      | 1      | 1       | 2      | 0       | 2       |
| 0      | 7      | 1      | 0       | 1      | 1       | 1       |
| 0      | 1      | 1      | 1       | 6      | 0       | 1       |
| 0      | 1      | 3      | 1       | 3      | 3       | 2       |
| 3      | 0      | 1      | 2       | 7      | 0       | 1       |
| 0      | 0      | 1      | 3       | 7      | 1       | 3       |
| 0      | 2      | 1      | 0       | 3      | 0       | 0       |
| 0      | 2      | 1      | 2       | 0      | 3       | 3       |
| 0      | 0      | 0      | 1       | 1      | 1       | 2       |
| 2      | 0      | 0      | 0       | 0      | 0       | 0       |
| D_9    | E_20   | E_29   | E_4     | E_5    | E_6     | F_1     |
| CHR_NP | CHR_NP | CHR_NP | CHR_NP  | CHR_NP | CHR_NP  | CHR_NP  |
| 731107 | 706856 | 854399 | 2525740 | 953915 | 1033145 | 1337703 |
| 24     | 9      | 13     | 17      | 12     | 13      | 11      |
| 0.53   | -2.59  | -1.70  | -0.97   | -1.94  | -1.79   | -2.15   |



|         |         |         |         |         |        |         |
|---------|---------|---------|---------|---------|--------|---------|
| 0.64    | 0.04    | 0.25    | 0.89    | 0.04    | 0.21   | 0.21    |
| 15      | 34      | 25      | 9       | 35      | 27     | 28      |
| 1       | 1       | 1       | 1       | 1       | 1      | 1       |
| 50      | 51      | 52      | 53      | 54      | 55     | 56      |
| 23      | 24      | 25      | 26      | 27      | 28     | 29      |
| E_5     | E_6     | F_1     | F_35    | F_36    | F_37   | F_38    |
| CHR_NP  | CHR_NP  | CHR_NP  | CHR_NP  | CHR_NP  | CHR_NP | CHR_NP  |
| 1597470 | 1583268 | 2592561 | 3565545 | 2585170 | 976547 | 1738984 |
| E_5     | E_6     | F_1     | F_35    | F_36    | F_37   | F_38    |
| 539941  | 452076  | 1019114 | 1755132 | 781741  | 473210 | 768215  |
| 99635   | 107343  | 314034  | 340046  | 296230  | 77703  | 201610  |
| 264828  | 202140  | 216370  | 77296   | 194779  | 50911  | 97414   |
| 66480   | 55579   | 193721  | 338825  | 202546  | 74728  | 131317  |
| 138176  | 149924  | 132168  | 131189  | 135975  | 59576  | 111341  |
| 43150   | 101571  | 22591   | 56016   | 78288   | 14801  | 32212   |
| 77544   | 75208   | 90366   | 90072   | 153035  | 26823  | 51941   |
| 9097    | 19477   | 2885    | 5235    | 8559    | 768    | 2104    |
| 30750   | 66644   | 21216   | 31586   | 66828   | 10588  | 16579   |
| 20533   | 25326   | 33662   | 60382   | 37679   | 15012  | 25734   |
| 11806   | 16643   | 37442   | 58644   | 47412   | 13953  | 14827   |
| 34432   | 40006   | 45021   | 44732   | 45670   | 12668  | 24311   |
| 12897   | 13780   | 28108   | 31789   | 45628   | 10437  | 10434   |
| 14905   | 12339   | 28906   | 62313   | 26495   | 11105  | 26421   |
| 3826    | 8625    | 3619    | 7407    | 17517   | 4647   | 2353    |
| 21105   | 13046   | 29277   | 27797   | 31237   | 13167  | 9460    |
| 4982    | 9159    | 5221    | 6277    | 15435   | 2270   | 2745    |
| 11358   | 15361   | 16006   | 20862   | 29022   | 4473   | 8323    |
| 8451    | 11039   | 8233    | 7956    | 16360   | 2743   | 5304    |



|       |      |       |       |       |      |       |
|-------|------|-------|-------|-------|------|-------|
| 10001 | 8617 | 19882 | 18075 | 15799 | 5800 | 12796 |
| 11595 | 7424 | 13305 | 14518 | 15608 | 3396 | 10456 |
| 5656  | 6032 | 10784 | 17013 | 14339 | 2358 | 6331  |
| 3364  | 3884 | 13575 | 15150 | 15827 | 4989 | 8178  |
| 4908  | 4100 | 6108  | 5207  | 16756 | 1222 | 3150  |
| 3201  | 5623 | 2676  | 2223  | 6081  | 1028 | 1837  |
| 10754 | 8504 | 15410 | 18819 | 12991 | 3995 | 10054 |
| 6129  | 4824 | 16793 | 22216 | 12082 | 4650 | 8405  |
| 3090  | 3810 | 1751  | 7872  | 3113  | 1833 | 766   |
| 5156  | 6291 | 11932 | 17314 | 13790 | 3271 | 6517  |
| 3944  | 6196 | 22369 | 25514 | 13858 | 4918 | 8664  |
| 9462  | 9551 | 4731  | 4426  | 12369 | 2081 | 2658  |
| 4324  | 3085 | 8943  | 17338 | 9925  | 3677 | 6526  |
| 2963  | 4434 | 2540  | 2521  | 5618  | 786  | 1282  |
| 722   | 1495 | 1575  | 2065  | 3334  | 537  | 549   |
| 4813  | 5923 | 11383 | 16461 | 13215 | 3026 | 6156  |
| 3362  | 3311 | 6902  | 16417 | 10148 | 1342 | 7627  |
| 2828  | 5461 | 5362  | 8173  | 5067  | 2086 | 3342  |
| 2907  | 4450 | 4987  | 4628  | 4906  | 1909 | 3313  |
| 2550  | 655  | 13960 | 11242 | 5566  | 1962 | 7611  |
| 3146  | 1415 | 3960  | 4905  | 3092  | 5354 | 2915  |
| 3186  | 2075 | 6041  | 7186  | 6246  | 1073 | 2774  |
| 5113  | 4677 | 3960  | 3350  | 4246  | 2177 | 2881  |
| 3727  | 2842 | 6730  | 9416  | 6452  | 1494 | 4811  |
| 447   | 1157 | 341   | 504   | 891   | 212  | 289   |
| 4984  | 4932 | 2963  | 1799  | 4632  | 598  | 2122  |
| 3568  | 3862 | 7118  | 6858  | 5056  | 3186 | 2944  |
| 1755  | 3380 | 7296  | 6820  | 6085  | 1422 | 2590  |
| 2856  | 2302 | 4118  | 4403  | 4612  | 1915 | 2580  |
| 238   | 324  | 192   | 202   | 302   | 126  | 111   |
| 1056  | 961  | 742   | 1113  | 1973  | 318  | 373   |
| 2139  | 3436 | 17555 | 14345 | 2557  | 601  | 5781  |
| 1369  | 1445 | 2132  | 2976  | 6477  | 409  | 1087  |
| 1628  | 1537 | 3421  | 5234  | 3637  | 565  | 2223  |
| 1017  | 892  | 1714  | 1390  | 2111  | 949  | 1193  |
| 2342  | 1151 | 2854  | 2421  | 1850  | 546  | 1509  |
| 144   | 292  | 154   | 214   | 272   | 61   | 88    |
| 1736  | 1442 | 2190  | 2551  | 3851  | 530  | 1617  |
| 2808  | 1498 | 1234  | 1030  | 2129  | 438  | 803   |
| 2131  | 1524 | 3269  | 1644  | 3523  | 844  | 1334  |
| 982   | 1044 | 3947  | 3551  | 3532  | 566  | 4142  |
| 882   | 1673 | 3917  | 3851  | 3053  | 630  | 1099  |
| 1766  | 1312 | 894   | 1101  | 1675  | 297  | 668   |
| 66    | 408  | 193   | 269   | 194   | 49   | 145   |
| 182   | 169  | 162   | 147   | 103   | 36   | 52    |
| 924   | 817  | 889   | 2726  | 739   | 1151 | 933   |
| 641   | 1102 | 773   | 1478  | 1802  | 176  | 462   |
| 617   | 1420 | 495   | 426   | 1076  | 132  | 207   |
| 271   | 586  | 321   | 754   | 809   | 80   | 200   |
| 924   | 1020 | 1142  | 1539  | 2826  | 156  | 618   |
| 552   | 550  | 1102  | 2470  | 619   | 557  | 497   |
| 846   | 907  | 2058  | 2575  | 1968  | 800  | 1021  |
| 755   | 691  | 1163  | 2735  | 1136  | 1147 | 1340  |
| 92    | 329  | 162   | 370   | 576   | 114  | 85    |
| 682   | 722  | 977   | 1460  | 1111  | 336  | 672   |
| 1412  | 1097 | 1119  | 601   | 1931  | 249  | 659   |
| 734   | 1217 | 4399  | 4764  | 1152  | 298  | 1655  |
| 776   | 646  | 1496  | 1583  | 1483  | 332  | 1087  |
| 277   | 349  | 2328  | 4121  | 1625  | 424  | 2238  |

|     |     |      |      |      |     |     |
|-----|-----|------|------|------|-----|-----|
| 529 | 508 | 1474 | 1671 | 1732 | 531 | 635 |
| 424 | 988 | 2117 | 2383 | 1721 | 236 | 768 |
| 620 | 644 | 478  | 748  | 824  | 200 | 493 |
| 857 | 692 | 1845 | 1459 | 1299 | 405 | 586 |
| 583 | 485 | 1575 | 2105 | 859  | 519 | 984 |
| 285 | 449 | 384  | 315  | 1205 | 104 | 101 |
| 298 | 282 | 920  | 694  | 926  | 161 | 528 |
| 547 | 646 | 1285 | 1177 | 1147 | 120 | 431 |
| 565 | 552 | 1561 | 1502 | 1142 | 677 | 586 |
| 186 | 557 | 106  | 170  | 286  | 62  | 110 |
| 593 | 601 | 622  | 620  | 1201 | 397 | 272 |
| 209 | 213 | 1078 | 1863 | 773  | 509 | 749 |
| 381 | 918 | 693  | 825  | 668  | 446 | 661 |
| 23  | 36  | 36   | 84   | 25   | 8   | 17  |
| 629 | 374 | 640  | 441  | 827  | 179 | 274 |
| 339 | 996 | 490  | 617  | 691  | 103 | 277 |
| 121 | 219 | 84   | 167  | 329  | 31  | 64  |
| 448 | 482 | 196  | 215  | 689  | 105 | 109 |
| 305 | 293 | 877  | 897  | 634  | 421 | 432 |
| 344 | 285 | 517  | 697  | 524  | 260 | 312 |
| 428 | 350 | 727  | 523  | 454  | 179 | 461 |
| 47  | 173 | 58   | 125  | 237  | 23  | 42  |
| 188 | 191 | 683  | 962  | 465  | 50  | 359 |
| 427 | 412 | 703  | 1006 | 760  | 181 | 461 |
| 373 | 262 | 690  | 379  | 677  | 270 | 303 |
| 147 | 240 | 251  | 398  | 452  | 84  | 161 |
| 137 | 291 | 117  | 193  | 272  | 62  | 105 |
| 82  | 135 | 69   | 100  | 131  | 27  | 53  |
| 302 | 315 | 655  | 721  | 723  | 139 | 230 |
| 295 | 297 | 449  | 589  | 953  | 97  | 265 |
| 145 | 247 | 181  | 313  | 421  | 47  | 98  |
| 130 | 238 | 132  | 213  | 405  | 24  | 84  |
| 348 | 524 | 163  | 131  | 270  | 96  | 174 |
| 477 | 272 | 542  | 512  | 688  | 158 | 264 |
| 141 | 135 | 382  | 512  | 578  | 29  | 211 |
| 103 | 179 | 94   | 282  | 211  | 26  | 125 |
| 500 | 337 | 362  | 87   | 404  | 88  | 171 |
| 98  | 123 | 596  | 599  | 490  | 173 | 272 |
| 144 | 226 | 119  | 202  | 194  | 57  | 81  |
| 113 | 351 | 286  | 309  | 640  | 111 | 118 |
| 113 | 351 | 286  | 309  | 640  | 111 | 118 |
| 109 | 118 | 203  | 279  | 305  | 27  | 85  |
| 228 | 194 | 233  | 373  | 339  | 52  | 165 |
| 254 | 278 | 176  | 508  | 437  | 182 | 212 |
| 355 | 632 | 386  | 277  | 162  | 35  | 160 |
| 160 | 148 | 121  | 142  | 312  | 51  | 120 |
| 26  | 45  | 33   | 22   | 71   | 5   | 15  |
| 193 | 109 | 316  | 490  | 442  | 217 | 130 |
| 161 | 103 | 368  | 223  | 330  | 42  | 345 |
| 247 | 261 | 310  | 326  | 367  | 76  | 178 |
| 106 | 149 | 628  | 632  | 248  | 48  | 184 |
| 112 | 85  | 313  | 675  | 304  | 145 | 168 |
| 67  | 48  | 453  | 736  | 436  | 77  | 457 |
| 120 | 208 | 156  | 110  | 319  | 76  | 61  |
| 73  | 203 | 368  | 354  | 402  | 42  | 135 |
| 115 | 113 | 339  | 426  | 331  | 43  | 169 |
| 72  | 116 | 95   | 57   | 124  | 31  | 25  |
| 114 | 110 | 268  | 239  | 282  | 60  | 99  |
| 112 | 85  | 107  | 263  | 89   | 12  | 89  |

|     |     |     |     |     |    |     |
|-----|-----|-----|-----|-----|----|-----|
| 142 | 132 | 97  | 144 | 132 | 39 | 75  |
| 113 | 153 | 215 | 158 | 240 | 42 | 92  |
| 120 | 143 | 302 | 287 | 252 | 26 | 131 |
| 124 | 100 | 191 | 267 | 166 | 42 | 125 |
| 134 | 111 | 184 | 258 | 366 | 48 | 146 |
| 82  | 90  | 123 | 122 | 93  | 61 | 61  |
| 113 | 93  | 193 | 118 | 252 | 57 | 100 |
| 7   | 15  | 18  | 21  | 37  | 1  | 17  |
| 97  | 93  | 90  | 208 | 110 | 48 | 83  |
| 160 | 55  | 153 | 250 | 289 | 78 | 88  |
| 121 | 158 | 98  | 133 | 243 | 57 | 56  |
| 54  | 69  | 93  | 232 | 213 | 59 | 90  |
| 125 | 101 | 149 | 204 | 128 | 23 | 97  |
| 48  | 51  | 62  | 73  | 144 | 32 | 37  |
| 58  | 92  | 31  | 97  | 84  | 13 | 37  |
| 119 | 278 | 193 | 159 | 86  | 9  | 73  |
| 97  | 35  | 159 | 207 | 187 | 39 | 87  |
| 399 | 120 | 22  | 5   | 87  | 3  | 12  |
| 61  | 59  | 116 | 341 | 135 | 55 | 80  |
| 41  | 30  | 134 | 233 | 147 | 13 | 86  |
| 58  | 226 | 314 | 409 | 140 | 27 | 57  |
| 133 | 109 | 158 | 173 | 173 | 23 | 100 |
| 57  | 55  | 112 | 234 | 105 | 48 | 91  |
| 12  | 9   | 19  | 11  | 18  | 1  | 5   |
| 49  | 53  | 147 | 199 | 194 | 14 | 64  |
| 76  | 60  | 155 | 237 | 137 | 48 | 102 |
| 33  | 46  | 48  | 58  | 104 | 10 | 28  |
| 30  | 43  | 63  | 84  | 233 | 10 | 32  |
| 73  | 56  | 96  | 127 | 91  | 63 | 66  |
| 118 | 69  | 241 | 227 | 185 | 26 | 115 |
| 35  | 57  | 30  | 105 | 48  | 12 | 24  |
| 40  | 82  | 35  | 10  | 26  | 7  | 12  |
| 54  | 69  | 50  | 125 | 78  | 18 | 37  |
| 103 | 55  | 157 | 118 | 151 | 30 | 96  |
| 33  | 52  | 77  | 111 | 163 | 20 | 18  |
| 53  | 70  | 127 | 114 | 152 | 36 | 82  |
| 49  | 74  | 89  | 139 | 130 | 39 | 48  |
| 16  | 35  | 35  | 36  | 141 | 6  | 11  |
| 68  | 22  | 81  | 106 | 95  | 28 | 42  |
| 43  | 114 | 413 | 441 | 130 | 14 | 106 |
| 45  | 102 | 68  | 141 | 140 | 40 | 44  |
| 68  | 45  | 120 | 69  | 122 | 14 | 64  |
| 53  | 104 | 338 | 405 | 104 | 9  | 103 |
| 41  | 53  | 143 | 233 | 73  | 28 | 97  |
| 21  | 22  | 22  | 20  | 45  | 9  | 14  |
| 61  | 99  | 641 | 482 | 98  | 15 | 131 |
| 42  | 83  | 13  | 16  | 46  | 16 | 16  |
| 32  | 66  | 351 | 283 | 157 | 47 | 68  |
| 64  | 45  | 84  | 82  | 85  | 45 | 50  |
| 21  | 21  | 21  | 19  | 44  | 9  | 13  |
| 58  | 101 | 409 | 350 | 58  | 16 | 70  |
| 72  | 99  | 117 | 90  | 141 | 20 | 10  |
| 30  | 35  | 169 | 150 | 148 | 30 | 117 |
| 52  | 105 | 366 | 93  | 516 | 55 | 4   |
| 26  | 55  | 4   | 11  | 31  | 1  | 5   |
| 44  | 73  | 103 | 148 | 148 | 17 | 28  |
| 40  | 21  | 71  | 83  | 68  | 90 | 63  |
| 14  | 36  | 261 | 263 | 69  | 21 | 120 |
| 37  | 38  | 94  | 69  | 193 | 11 | 62  |

|    |     |     |     |     |    |     |
|----|-----|-----|-----|-----|----|-----|
| 20 | 33  | 12  | 11  | 34  | 6  | 12  |
| 50 | 47  | 31  | 70  | 46  | 20 | 52  |
| 33 | 61  | 84  | 142 | 137 | 11 | 42  |
| 75 | 30  | 33  | 64  | 66  | 26 | 67  |
| 62 | 20  | 77  | 97  | 43  | 23 | 57  |
| 43 | 75  | 37  | 259 | 52  | 23 | 35  |
| 22 | 24  | 97  | 75  | 49  | 23 | 78  |
| 28 | 26  | 125 | 150 | 163 | 15 | 54  |
| 10 | 37  | 12  | 51  | 40  | 3  | 10  |
| 74 | 104 | 327 | 275 | 60  | 11 | 107 |
| 37 | 33  | 46  | 95  | 49  | 15 | 49  |
| 51 | 48  | 80  | 82  | 74  | 13 | 35  |
| 43 | 120 | 120 | 143 | 173 | 20 | 40  |
| 37 | 23  | 38  | 115 | 34  | 17 | 32  |
| 47 | 47  | 109 | 74  | 99  | 14 | 37  |
| 57 | 37  | 52  | 42  | 115 | 20 | 36  |
| 27 | 80  | 67  | 39  | 15  | 2  | 18  |
| 29 | 53  | 61  | 82  | 43  | 20 | 24  |
| 31 | 55  | 44  | 36  | 62  | 12 | 18  |
| 34 | 38  | 78  | 68  | 79  | 38 | 52  |
| 46 | 38  | 87  | 62  | 71  | 15 | 29  |
| 30 | 25  | 18  | 33  | 95  | 8  | 13  |
| 1  | 3   | 0   | 4   | 4   | 0  | 3   |
| 36 | 24  | 29  | 60  | 40  | 8  | 30  |
| 5  | 11  | 6   | 46  | 61  | 1  | 8   |
| 25 | 24  | 37  | 42  | 60  | 8  | 21  |
| 51 | 34  | 55  | 25  | 41  | 3  | 33  |
| 16 | 31  | 40  | 51  | 63  | 4  | 23  |
| 62 | 159 | 96  | 68  | 44  | 4  | 24  |
| 51 | 21  | 61  | 29  | 66  | 19 | 41  |
| 32 | 11  | 45  | 60  | 46  | 10 | 45  |
| 28 | 34  | 50  | 53  | 36  | 20 | 30  |
| 16 | 21  | 102 | 145 | 54  | 21 | 47  |
| 23 | 28  | 35  | 49  | 44  | 2  | 27  |
| 5  | 33  | 25  | 27  | 42  | 1  | 8   |
| 13 | 18  | 47  | 63  | 29  | 16 | 46  |
| 1  | 4   | 6   | 5   | 7   | 0  | 1   |
| 19 | 29  | 90  | 86  | 88  | 10 | 30  |
| 37 | 45  | 43  | 32  | 53  | 9  | 23  |
| 42 | 14  | 26  | 48  | 32  | 1  | 38  |
| 39 | 19  | 44  | 30  | 62  | 5  | 26  |
| 5  | 12  | 27  | 17  | 75  | 6  | 9   |
| 11 | 18  | 14  | 23  | 57  | 8  | 10  |
| 27 | 27  | 48  | 44  | 57  | 9  | 18  |
| 13 | 49  | 111 | 132 | 43  | 3  | 26  |
| 26 | 15  | 39  | 31  | 36  | 9  | 14  |
| 7  | 15  | 2   | 10  | 13  | 1  | 6   |
| 25 | 22  | 22  | 41  | 58  | 4  | 14  |
| 25 | 22  | 22  | 41  | 58  | 4  | 14  |
| 19 | 47  | 209 | 189 | 33  | 14 | 47  |
| 13 | 16  | 35  | 42  | 21  | 3  | 21  |
| 15 | 14  | 36  | 51  | 50  | 6  | 31  |
| 50 | 74  | 101 | 65  | 30  | 5  | 11  |
| 25 | 24  | 22  | 35  | 54  | 9  | 17  |
| 31 | 14  | 26  | 28  | 82  | 10 | 18  |
| 9  | 17  | 25  | 42  | 47  | 4  | 7   |
| 22 | 22  | 10  | 28  | 24  | 19 | 16  |
| 48 | 18  | 42  | 29  | 18  | 4  | 21  |
| 24 | 12  | 5   | 10  | 50  | 14 | 6   |

|    |    |     |    |    |    |    |
|----|----|-----|----|----|----|----|
| 15 | 4  | 90  | 93 | 37 | 6  | 18 |
| 23 | 32 | 17  | 15 | 31 | 0  | 2  |
| 17 | 22 | 28  | 25 | 38 | 2  | 21 |
| 1  | 1  | 4   | 2  | 3  | 0  | 0  |
| 21 | 24 | 22  | 29 | 35 | 3  | 8  |
| 16 | 11 | 11  | 24 | 32 | 2  | 7  |
| 9  | 8  | 38  | 41 | 42 | 14 | 23 |
| 16 | 16 | 21  | 51 | 37 | 9  | 20 |
| 15 | 11 | 11  | 23 | 32 | 2  | 7  |
| 8  | 3  | 47  | 64 | 37 | 10 | 30 |
| 13 | 22 | 70  | 91 | 26 | 5  | 15 |
| 14 | 35 | 18  | 11 | 10 | 9  | 3  |
| 10 | 20 | 23  | 46 | 22 | 8  | 23 |
| 3  | 1  | 0   | 1  | 2  | 0  | 0  |
| 31 | 12 | 18  | 13 | 25 | 5  | 19 |
| 7  | 13 | 15  | 26 | 12 | 7  | 8  |
| 11 | 1  | 26  | 45 | 14 | 5  | 11 |
| 15 | 25 | 97  | 88 | 30 | 2  | 23 |
| 23 | 25 | 9   | 9  | 18 | 4  | 11 |
| 3  | 1  | 1   | 4  | 1  | 0  | 0  |
| 18 | 14 | 28  | 23 | 18 | 2  | 10 |
| 12 | 22 | 6   | 10 | 29 | 5  | 2  |
| 0  | 0  | 0   | 0  | 0  | 0  | 0  |
| 8  | 14 | 16  | 40 | 11 | 11 | 20 |
| 9  | 4  | 20  | 25 | 44 | 3  | 11 |
| 10 | 8  | 36  | 45 | 33 | 3  | 30 |
| 14 | 18 | 82  | 73 | 10 | 5  | 36 |
| 12 | 16 | 27  | 49 | 19 | 7  | 21 |
| 16 | 30 | 101 | 62 | 20 | 2  | 23 |
| 15 | 3  | 14  | 35 | 20 | 3  | 20 |
| 20 | 16 | 45  | 44 | 35 | 10 | 5  |
| 8  | 14 | 38  | 40 | 21 | 11 | 18 |
| 12 | 19 | 5   | 8  | 28 | 5  | 2  |
| 28 | 42 | 48  | 28 | 10 | 3  | 15 |
| 1  | 1  | 0   | 4  | 2  | 1  | 1  |
| 1  | 14 | 4   | 6  | 11 | 2  | 5  |
| 6  | 7  | 15  | 11 | 31 | 2  | 7  |
| 18 | 8  | 29  | 42 | 34 | 6  | 14 |
| 5  | 7  | 14  | 9  | 14 | 6  | 3  |
| 49 | 12 | 3   | 1  | 17 | 1  | 2  |
| 20 | 28 | 106 | 61 | 22 | 8  | 20 |
| 6  | 19 | 3   | 11 | 13 | 5  | 0  |
| 8  | 9  | 38  | 34 | 8  | 8  | 15 |
| 13 | 9  | 19  | 10 | 18 | 2  | 4  |
| 20 | 23 | 22  | 24 | 29 | 4  | 16 |
| 17 | 70 | 11  | 6  | 13 | 0  | 6  |
| 17 | 18 | 85  | 72 | 13 | 2  | 24 |
| 17 | 10 | 25  | 26 | 13 | 7  | 12 |
| 8  | 12 | 25  | 24 | 31 | 9  | 20 |
| 6  | 7  | 6   | 23 | 7  | 13 | 12 |
| 7  | 23 | 11  | 24 | 15 | 8  | 9  |
| 14 | 11 | 9   | 17 | 12 | 6  | 14 |
| 15 | 17 | 11  | 9  | 10 | 4  | 4  |
| 8  | 8  | 33  | 17 | 15 | 8  | 12 |
| 7  | 5  | 18  | 12 | 21 | 0  | 11 |
| 10 | 24 | 14  | 21 | 22 | 3  | 7  |
| 10 | 10 | 26  | 28 | 9  | 6  | 8  |
| 4  | 7  | 2   | 2  | 4  | 1  | 1  |
| 1  | 5  | 6   | 4  | 6  | 1  | 3  |

|    |    |    |    |    |    |    |
|----|----|----|----|----|----|----|
| 7  | 7  | 4  | 13 | 8  | 2  | 6  |
| 3  | 6  | 17 | 18 | 17 | 2  | 10 |
| 8  | 5  | 9  | 18 | 10 | 6  | 6  |
| 6  | 3  | 29 | 21 | 15 | 3  | 13 |
| 8  | 24 | 18 | 14 | 13 | 0  | 7  |
| 12 | 6  | 13 | 14 | 32 | 7  | 8  |
| 10 | 8  | 25 | 26 | 18 | 9  | 10 |
| 2  | 7  | 4  | 8  | 9  | 2  | 3  |
| 11 | 8  | 12 | 21 | 17 | 4  | 14 |
| 18 | 16 | 81 | 54 | 14 | 3  | 19 |
| 6  | 7  | 27 | 33 | 16 | 15 | 18 |
| 19 | 25 | 38 | 20 | 14 | 2  | 15 |
| 9  | 5  | 1  | 11 | 21 | 0  | 0  |
| 8  | 7  | 20 | 18 | 27 | 6  | 8  |
| 2  | 8  | 6  | 19 | 21 | 4  | 10 |
| 4  | 5  | 14 | 27 | 25 | 1  | 12 |
| 16 | 2  | 7  | 9  | 19 | 7  | 8  |
| 7  | 10 | 17 | 22 | 17 | 1  | 10 |
| 5  | 2  | 4  | 1  | 5  | 0  | 1  |
| 8  | 6  | 17 | 19 | 22 | 8  | 5  |
| 5  | 15 | 4  | 7  | 6  | 0  | 0  |
| 8  | 5  | 9  | 29 | 8  | 6  | 9  |
| 10 | 13 | 14 | 19 | 19 | 8  | 6  |
| 5  | 8  | 16 | 15 | 20 | 8  | 5  |
| 4  | 0  | 33 | 31 | 37 | 5  | 43 |
| 8  | 18 | 10 | 18 | 7  | 1  | 5  |
| 4  | 9  | 5  | 20 | 6  | 2  | 5  |
| 5  | 7  | 10 | 12 | 20 | 15 | 6  |
| 10 | 7  | 18 | 14 | 19 | 2  | 14 |
| 7  | 7  | 9  | 20 | 15 | 4  | 15 |
| 7  | 0  | 8  | 22 | 13 | 10 | 8  |
| 5  | 7  | 19 | 9  | 21 | 4  | 36 |
| 8  | 4  | 3  | 11 | 15 | 1  | 4  |
| 4  | 6  | 8  | 12 | 3  | 1  | 1  |
| 7  | 7  | 5  | 8  | 6  | 0  | 5  |
| 5  | 11 | 8  | 11 | 25 | 7  | 2  |
| 5  | 4  | 16 | 19 | 14 | 7  | 9  |
| 6  | 8  | 5  | 3  | 11 | 2  | 7  |
| 2  | 0  | 3  | 6  | 13 | 6  | 13 |
| 0  | 3  | 1  | 1  | 3  | 0  | 2  |
| 2  | 4  | 3  | 5  | 6  | 7  | 5  |
| 10 | 4  | 4  | 10 | 11 | 1  | 5  |
| 6  | 8  | 8  | 3  | 13 | 2  | 1  |
| 5  | 9  | 16 | 13 | 14 | 5  | 9  |
| 1  | 16 | 7  | 1  | 7  | 1  | 1  |
| 3  | 2  | 6  | 6  | 12 | 1  | 3  |
| 4  | 5  | 9  | 5  | 7  | 0  | 2  |
| 6  | 1  | 2  | 3  | 11 | 1  | 3  |
| 8  | 4  | 20 | 5  | 9  | 0  | 3  |
| 4  | 6  | 11 | 10 | 7  | 5  | 4  |
| 2  | 6  | 2  | 10 | 3  | 1  | 6  |
| 5  | 5  | 17 | 15 | 11 | 2  | 4  |
| 3  | 4  | 1  | 1  | 5  | 0  | 0  |
| 1  | 1  | 2  | 1  | 7  | 0  | 0  |
| 7  | 3  | 13 | 4  | 12 | 3  | 7  |
| 2  | 8  | 5  | 9  | 9  | 0  | 4  |
| 1  | 14 | 26 | 2  | 12 | 4  | 1  |
| 3  | 3  | 10 | 11 | 11 | 4  | 2  |
| 3  | 5  | 8  | 9  | 9  | 2  | 4  |

|    |    |    |    |    |    |    |
|----|----|----|----|----|----|----|
| 9  | 5  | 3  | 1  | 3  | 8  | 3  |
| 2  | 1  | 1  | 3  | 1  | 0  | 0  |
| 9  | 7  | 26 | 35 | 1  | 4  | 8  |
| 7  | 3  | 7  | 8  | 10 | 2  | 4  |
| 4  | 1  | 12 | 14 | 2  | 4  | 5  |
| 3  | 3  | 9  | 11 | 5  | 3  | 1  |
| 4  | 3  | 10 | 11 | 6  | 10 | 6  |
| 3  | 1  | 5  | 7  | 8  | 7  | 8  |
| 3  | 8  | 4  | 6  | 7  | 3  | 1  |
| 6  | 6  | 32 | 22 | 6  | 1  | 5  |
| 0  | 1  | 8  | 9  | 14 | 2  | 2  |
| 6  | 1  | 10 | 7  | 8  | 6  | 6  |
| 6  | 4  | 4  | 1  | 6  | 2  | 1  |
| 3  | 4  | 2  | 7  | 8  | 2  | 9  |
| 2  | 5  | 9  | 8  | 10 | 3  | 3  |
| 7  | 3  | 0  | 0  | 12 | 1  | 0  |
| 0  | 0  | 4  | 6  | 30 | 0  | 0  |
| 1  | 2  | 4  | 7  | 3  | 2  | 4  |
| 5  | 18 | 11 | 14 | 5  | 1  | 3  |
| 2  | 5  | 5  | 1  | 2  | 1  | 2  |
| 4  | 2  | 6  | 11 | 5  | 0  | 3  |
| 4  | 8  | 13 | 10 | 10 | 4  | 2  |
| 1  | 1  | 0  | 0  | 3  | 0  | 2  |
| 5  | 6  | 7  | 5  | 6  | 1  | 2  |
| 6  | 1  | 5  | 10 | 11 | 0  | 5  |
| 12 | 0  | 4  | 4  | 7  | 0  | 1  |
| 5  | 4  | 1  | 3  | 7  | 2  | 0  |
| 1  | 1  | 10 | 9  | 14 | 3  | 9  |
| 4  | 2  | 0  | 3  | 6  | 0  | 1  |
| 1  | 4  | 1  | 1  | 1  | 2  | 2  |
| 4  | 2  | 10 | 6  | 12 | 0  | 10 |
| 1  | 4  | 20 | 25 | 4  | 1  | 5  |
| 2  | 4  | 10 | 8  | 6  | 2  | 5  |
| 4  | 1  | 3  | 4  | 8  | 3  | 1  |
| 3  | 3  | 11 | 5  | 2  | 6  | 3  |
| 4  | 0  | 7  | 1  | 5  | 2  | 3  |
| 0  | 1  | 0  | 1  | 1  | 0  | 0  |
| 0  | 0  | 2  | 0  | 2  | 0  | 0  |
| 0  | 1  | 0  | 0  | 0  | 0  | 0  |
| 3  | 2  | 4  | 1  | 2  | 0  | 0  |
| 7  | 6  | 3  | 3  | 7  | 1  | 1  |
| 3  | 6  | 11 | 15 | 6  | 0  | 6  |
| 2  | 5  | 3  | 13 | 6  | 0  | 9  |
| 1  | 6  | 11 | 8  | 10 | 5  | 4  |
| 0  | 1  | 0  | 0  | 0  | 0  | 0  |
| 3  | 13 | 4  | 8  | 6  | 0  | 1  |
| 3  | 5  | 17 | 13 | 7  | 0  | 1  |
| 0  | 2  | 3  | 0  | 3  | 0  | 0  |
| 1  | 3  | 8  | 6  | 8  | 1  | 4  |
| 3  | 3  | 8  | 12 | 5  | 1  | 4  |
| 3  | 1  | 7  | 6  | 2  | 1  | 3  |
| 2  | 1  | 0  | 0  | 0  | 0  | 0  |
| 12 | 4  | 10 | 0  | 3  | 1  | 1  |
| 0  | 3  | 2  | 4  | 3  | 2  | 1  |
| 4  | 1  | 5  | 8  | 3  | 1  | 5  |
| 2  | 6  | 7  | 2  | 3  | 0  | 1  |
| 0  | 2  | 0  | 0  | 0  | 0  | 0  |
| 3  | 9  | 6  | 3  | 4  | 1  | 2  |
| 6  | 3  | 4  | 9  | 4  | 0  | 2  |

|   |   |    |    |    |   |    |
|---|---|----|----|----|---|----|
| 2 | 1 | 2  | 2  | 2  | 2 | 0  |
| 7 | 5 | 3  | 3  | 3  | 2 | 2  |
| 2 | 0 | 9  | 10 | 5  | 1 | 12 |
| 4 | 0 | 5  | 7  | 5  | 4 | 1  |
| 3 | 3 | 2  | 3  | 3  | 2 | 1  |
| 3 | 3 | 6  | 0  | 3  | 2 | 1  |
| 1 | 3 | 7  | 20 | 6  | 0 | 3  |
| 0 | 1 | 2  | 6  | 0  | 0 | 1  |
| 1 | 0 | 4  | 5  | 8  | 1 | 2  |
| 1 | 2 | 8  | 10 | 2  | 3 | 7  |
| 3 | 4 | 7  | 2  | 10 | 0 | 2  |
| 4 | 2 | 2  | 5  | 2  | 2 | 4  |
| 0 | 9 | 5  | 7  | 6  | 0 | 1  |
| 1 | 4 | 1  | 0  | 1  | 1 | 0  |
| 5 | 1 | 3  | 4  | 6  | 0 | 3  |
| 2 | 0 | 4  | 4  | 1  | 2 | 1  |
| 1 | 1 | 3  | 5  | 12 | 0 | 3  |
| 1 | 5 | 5  | 5  | 3  | 2 | 6  |
| 0 | 3 | 2  | 0  | 2  | 1 | 1  |
| 0 | 6 | 5  | 6  | 1  | 0 | 3  |
| 0 | 0 | 2  | 3  | 3  | 2 | 3  |
| 8 | 4 | 3  | 3  | 7  | 2 | 2  |
| 2 | 0 | 0  | 4  | 6  | 0 | 3  |
| 1 | 0 | 3  | 7  | 4  | 0 | 3  |
| 2 | 1 | 6  | 15 | 12 | 2 | 4  |
| 1 | 2 | 5  | 10 | 1  | 3 | 4  |
| 8 | 1 | 3  | 3  | 7  | 1 | 1  |
| 2 | 1 | 4  | 4  | 5  | 2 | 1  |
| 6 | 2 | 1  | 1  | 7  | 3 | 1  |
| 2 | 1 | 3  | 5  | 1  | 0 | 3  |
| 1 | 4 | 4  | 4  | 1  | 1 | 1  |
| 0 | 1 | 0  | 1  | 0  | 0 | 0  |
| 3 | 2 | 6  | 8  | 11 | 0 | 2  |
| 1 | 3 | 3  | 1  | 1  | 0 | 1  |
| 1 | 0 | 5  | 3  | 2  | 2 | 1  |
| 0 | 2 | 3  | 2  | 4  | 0 | 0  |
| 0 | 0 | 8  | 0  | 3  | 2 | 1  |
| 0 | 1 | 5  | 7  | 2  | 2 | 2  |
| 1 | 2 | 1  | 0  | 1  | 0 | 1  |
| 2 | 2 | 1  | 3  | 0  | 0 | 1  |
| 2 | 3 | 0  | 2  | 3  | 0 | 4  |
| 5 | 2 | 4  | 0  | 2  | 0 | 2  |
| 0 | 0 | 5  | 9  | 9  | 2 | 3  |
| 0 | 1 | 17 | 16 | 5  | 0 | 8  |
| 0 | 0 | 0  | 1  | 3  | 1 | 0  |
| 2 | 0 | 1  | 5  | 4  | 0 | 0  |
| 3 | 1 | 1  | 0  | 2  | 0 | 0  |
| 0 | 0 | 0  | 0  | 0  | 0 | 0  |
| 0 | 1 | 0  | 0  | 6  | 0 | 0  |
| 1 | 0 | 1  | 5  | 4  | 0 | 2  |
| 1 | 1 | 4  | 1  | 7  | 0 | 6  |
| 0 | 3 | 3  | 5  | 4  | 1 | 2  |
| 2 | 1 | 4  | 7  | 3  | 1 | 2  |
| 2 | 2 | 8  | 5  | 3  | 1 | 4  |
| 0 | 0 | 1  | 0  | 0  | 0 | 0  |
| 0 | 0 | 0  | 1  | 1  | 1 | 0  |
| 2 | 4 | 2  | 1  | 2  | 1 | 2  |
| 0 | 2 | 5  | 4  | 2  | 2 | 3  |
| 1 | 0 | 1  | 2  | 1  | 2 | 5  |



|   |   |   |    |   |   |   |
|---|---|---|----|---|---|---|
| 0 | 0 | 2 | 9  | 3 | 0 | 7 |
| 0 | 0 | 4 | 5  | 4 | 0 | 1 |
| 1 | 2 | 1 | 5  | 7 | 2 | 1 |
| 1 | 1 | 1 | 1  | 2 | 0 | 1 |
| 1 | 2 | 2 | 1  | 1 | 1 | 1 |
| 1 | 5 | 6 | 4  | 5 | 0 | 0 |
| 1 | 3 | 1 | 4  | 1 | 0 | 0 |
| 0 | 2 | 0 | 2  | 2 | 1 | 0 |
| 0 | 2 | 9 | 6  | 6 | 1 | 1 |
| 5 | 0 | 3 | 1  | 5 | 3 | 4 |
| 3 | 0 | 6 | 4  | 2 | 1 | 1 |
| 1 | 0 | 4 | 3  | 2 | 1 | 1 |
| 1 | 0 | 0 | 2  | 1 | 0 | 3 |
| 0 | 1 | 4 | 5  | 2 | 5 | 0 |
| 0 | 0 | 1 | 1  | 0 | 1 | 2 |
| 1 | 1 | 1 | 2  | 2 | 1 | 2 |
| 0 | 1 | 5 | 3  | 5 | 1 | 1 |
| 2 | 3 | 1 | 5  | 2 | 0 | 0 |
| 0 | 0 | 0 | 1  | 0 | 0 | 0 |
| 0 | 1 | 0 | 4  | 0 | 0 | 1 |
| 3 | 0 | 1 | 1  | 3 | 1 | 0 |
| 1 | 1 | 1 | 1  | 2 | 2 | 2 |
| 0 | 3 | 0 | 1  | 2 | 1 | 1 |
| 3 | 4 | 6 | 2  | 5 | 0 | 3 |
| 4 | 3 | 2 | 4  | 3 | 2 | 0 |
| 2 | 2 | 2 | 5  | 7 | 2 | 0 |
| 1 | 1 | 2 | 4  | 4 | 0 | 0 |
| 4 | 0 | 2 | 3  | 3 | 0 | 1 |
| 3 | 0 | 0 | 1  | 5 | 0 | 1 |
| 2 | 0 | 2 | 2  | 0 | 0 | 0 |
| 1 | 1 | 1 | 0  | 4 | 0 | 0 |
| 6 | 0 | 1 | 0  | 0 | 0 | 0 |
| 3 | 3 | 2 | 3  | 1 | 1 | 2 |
| 7 | 0 | 1 | 0  | 1 | 0 | 2 |
| 7 | 1 | 3 | 1  | 0 | 2 | 1 |
| 3 | 0 | 0 | 10 | 0 | 0 | 0 |
| 0 | 3 | 3 | 3  | 2 | 0 | 1 |
| 1 | 1 | 2 | 1  | 1 | 0 | 2 |

|         |         |         |         |         |        |         |
|---------|---------|---------|---------|---------|--------|---------|
| 0.64    | 0.04    | 0.25    | 0.89    | 0.04    | 0.21   | 0.21    |
| 15      | 34      | 25      | 9       | 35      | 27     | 28      |
| 1       | 1       | 1       | 1       | 1       | 1      | 1       |
| 50      | 51      | 52      | 53      | 54      | 55     | 56      |
| 23      | 24      | 25      | 26      | 27      | 28     | 29      |
| E_5     | E_6     | F_1     | F_35    | F_36    | F_37   | F_38    |
| CHR_NP  | CHR_NP  | CHR_NP  | CHR_NP  | CHR_NP  | CHR_NP | CHR_NP  |
| 1597470 | 1583268 | 2592561 | 3565545 | 2585170 | 976547 | 1738984 |
| CHR_NP  | CHR_NP  | CHR_NP  | CHR_NP  | CHR_NP  | CHR_NP | CHR_NP  |
| 539941  | 452076  | 1019114 | 1755132 | 781741  | 473210 | 768215  |
| 99635   | 107343  | 314034  | 340046  | 296230  | 77703  | 201610  |
| 264828  | 202140  | 216370  | 77296   | 194779  | 50911  | 97414   |
| 66480   | 55579   | 193721  | 338825  | 202546  | 74728  | 131317  |
| 138176  | 149924  | 132168  | 131189  | 135975  | 59576  | 111341  |

|       |        |       |       |        |       |       |
|-------|--------|-------|-------|--------|-------|-------|
| 43150 | 101571 | 22591 | 56016 | 78288  | 14801 | 32212 |
| 77544 | 75208  | 90366 | 90072 | 153035 | 26823 | 51941 |
| 9097  | 19477  | 2885  | 5235  | 8559   | 768   | 2104  |
| 30750 | 66644  | 21216 | 31586 | 66828  | 10588 | 16579 |
| 20533 | 25326  | 33662 | 60382 | 37679  | 15012 | 25734 |
| 11806 | 16643  | 37442 | 58644 | 47412  | 13953 | 14827 |
| 34432 | 40006  | 45021 | 44732 | 45670  | 12668 | 24311 |
| 12897 | 13780  | 28108 | 31789 | 45628  | 10437 | 10434 |
| 14905 | 12339  | 28906 | 62313 | 26495  | 11105 | 26421 |
| 3826  | 8625   | 3619  | 7407  | 17517  | 4647  | 2353  |
| 21105 | 13046  | 29277 | 27797 | 31237  | 13167 | 9460  |
| 4982  | 9159   | 5221  | 6277  | 15435  | 2270  | 2745  |
| 11358 | 15361  | 16006 | 20862 | 29022  | 4473  | 8323  |
| 8451  | 11039  | 8233  | 7956  | 16360  | 2743  | 5304  |
| 10001 | 8617   | 19882 | 18075 | 15799  | 5800  | 12796 |
| 11595 | 7424   | 13305 | 14518 | 15608  | 3396  | 10456 |
| 5656  | 6032   | 10784 | 17013 | 14339  | 2358  | 6331  |
| 3364  | 3884   | 13575 | 15150 | 15827  | 4989  | 8178  |
| 4908  | 4100   | 6108  | 5207  | 16756  | 1222  | 3150  |
| 3201  | 5623   | 2676  | 2223  | 6081   | 1028  | 1837  |
| 10754 | 8504   | 15410 | 18819 | 12991  | 3995  | 10054 |
| 6129  | 4824   | 16793 | 22216 | 12082  | 4650  | 8405  |
| 3090  | 3810   | 1751  | 7872  | 3113   | 1833  | 766   |
| 5156  | 6291   | 11932 | 17314 | 13790  | 3271  | 6517  |
| 3944  | 6196   | 22369 | 25514 | 13858  | 4918  | 8664  |
| 9462  | 9551   | 4731  | 4426  | 12369  | 2081  | 2658  |
| 4324  | 3085   | 8943  | 17338 | 9925   | 3677  | 6526  |
| 2963  | 4434   | 2540  | 2521  | 5618   | 786   | 1282  |
| 722   | 1495   | 1575  | 2065  | 3334   | 537   | 549   |
| 4813  | 5923   | 11383 | 16461 | 13215  | 3026  | 6156  |
| 3362  | 3311   | 6902  | 16417 | 10148  | 1342  | 7627  |
| 2828  | 5461   | 5362  | 8173  | 5067   | 2086  | 3342  |
| 2907  | 4450   | 4987  | 4628  | 4906   | 1909  | 3313  |
| 2550  | 655    | 13960 | 11242 | 5566   | 1962  | 7611  |
| 3146  | 1415   | 3960  | 4905  | 3092   | 5354  | 2915  |
| 3186  | 2075   | 6041  | 7186  | 6246   | 1073  | 2774  |
| 5113  | 4677   | 3960  | 3350  | 4246   | 2177  | 2881  |
| 3727  | 2842   | 6730  | 9416  | 6452   | 1494  | 4811  |
| 447   | 1157   | 341   | 504   | 891    | 212   | 289   |
| 4984  | 4932   | 2963  | 1799  | 4632   | 598   | 2122  |
| 3568  | 3862   | 7118  | 6858  | 5056   | 3186  | 2944  |
| 1755  | 3380   | 7296  | 6820  | 6085   | 1422  | 2590  |
| 2856  | 2302   | 4118  | 4403  | 4612   | 1915  | 2580  |
| 238   | 324    | 192   | 202   | 302    | 126   | 111   |
| 1056  | 961    | 742   | 1113  | 1973   | 318   | 373   |
| 2139  | 3436   | 17555 | 14345 | 2557   | 601   | 5781  |
| 1369  | 1445   | 2132  | 2976  | 6477   | 409   | 1087  |
| 1628  | 1537   | 3421  | 5234  | 3637   | 565   | 2223  |
| 1017  | 892    | 1714  | 1390  | 2111   | 949   | 1193  |
| 2342  | 1151   | 2854  | 2421  | 1850   | 546   | 1509  |
| 144   | 292    | 154   | 214   | 272    | 61    | 88    |
| 1736  | 1442   | 2190  | 2551  | 3851   | 530   | 1617  |
| 2808  | 1498   | 1234  | 1030  | 2129   | 438   | 803   |
| 2131  | 1524   | 3269  | 1644  | 3523   | 844   | 1334  |
| 982   | 1044   | 3947  | 3551  | 3532   | 566   | 4142  |
| 882   | 1673   | 3917  | 3851  | 3053   | 630   | 1099  |
| 1766  | 1312   | 894   | 1101  | 1675   | 297   | 668   |
| 66    | 408    | 193   | 269   | 194    | 49    | 145   |
| 182   | 169    | 162   | 147   | 103    | 36    | 52    |

|      |      |      |      |      |      |      |
|------|------|------|------|------|------|------|
| 924  | 817  | 889  | 2726 | 739  | 1151 | 933  |
| 641  | 1102 | 773  | 1478 | 1802 | 176  | 462  |
| 617  | 1420 | 495  | 426  | 1076 | 132  | 207  |
| 271  | 586  | 321  | 754  | 809  | 80   | 200  |
| 924  | 1020 | 1142 | 1539 | 2826 | 156  | 618  |
| 552  | 550  | 1102 | 2470 | 619  | 557  | 497  |
| 846  | 907  | 2058 | 2575 | 1968 | 800  | 1021 |
| 755  | 691  | 1163 | 2735 | 1136 | 1147 | 1340 |
| 92   | 329  | 162  | 370  | 576  | 114  | 85   |
| 682  | 722  | 977  | 1460 | 1111 | 336  | 672  |
| 1412 | 1097 | 1119 | 601  | 1931 | 249  | 659  |
| 734  | 1217 | 4399 | 4764 | 1152 | 298  | 1655 |
| 776  | 646  | 1496 | 1583 | 1483 | 332  | 1087 |
| 277  | 349  | 2328 | 4121 | 1625 | 424  | 2238 |
| 529  | 508  | 1474 | 1671 | 1732 | 531  | 635  |
| 424  | 988  | 2117 | 2383 | 1721 | 236  | 768  |
| 620  | 644  | 478  | 748  | 824  | 200  | 493  |
| 857  | 692  | 1845 | 1459 | 1299 | 405  | 586  |
| 583  | 485  | 1575 | 2105 | 859  | 519  | 984  |
| 285  | 449  | 384  | 315  | 1205 | 104  | 101  |
| 298  | 282  | 920  | 694  | 926  | 161  | 528  |
| 547  | 646  | 1285 | 1177 | 1147 | 120  | 431  |
| 565  | 552  | 1561 | 1502 | 1142 | 677  | 586  |
| 186  | 557  | 106  | 170  | 286  | 62   | 110  |
| 593  | 601  | 622  | 620  | 1201 | 397  | 272  |
| 209  | 213  | 1078 | 1863 | 773  | 509  | 749  |
| 381  | 918  | 693  | 825  | 668  | 446  | 661  |
| 23   | 36   | 36   | 84   | 25   | 8    | 17   |
| 629  | 374  | 640  | 441  | 827  | 179  | 274  |
| 339  | 996  | 490  | 617  | 691  | 103  | 277  |
| 121  | 219  | 84   | 167  | 329  | 31   | 64   |
| 448  | 482  | 196  | 215  | 689  | 105  | 109  |
| 305  | 293  | 877  | 897  | 634  | 421  | 432  |
| 344  | 285  | 517  | 697  | 524  | 260  | 312  |
| 428  | 350  | 727  | 523  | 454  | 179  | 461  |
| 47   | 173  | 58   | 125  | 237  | 23   | 42   |
| 188  | 191  | 683  | 962  | 465  | 50   | 359  |
| 427  | 412  | 703  | 1006 | 760  | 181  | 461  |
| 373  | 262  | 690  | 379  | 677  | 270  | 303  |
| 147  | 240  | 251  | 398  | 452  | 84   | 161  |
| 137  | 291  | 117  | 193  | 272  | 62   | 105  |
| 82   | 135  | 69   | 100  | 131  | 27   | 53   |
| 302  | 315  | 655  | 721  | 723  | 139  | 230  |
| 295  | 297  | 449  | 589  | 953  | 97   | 265  |
| 145  | 247  | 181  | 313  | 421  | 47   | 98   |
| 130  | 238  | 132  | 213  | 405  | 24   | 84   |
| 348  | 524  | 163  | 131  | 270  | 96   | 174  |
| 477  | 272  | 542  | 512  | 688  | 158  | 264  |
| 141  | 135  | 382  | 512  | 578  | 29   | 211  |
| 103  | 179  | 94   | 282  | 211  | 26   | 125  |
| 500  | 337  | 362  | 87   | 404  | 88   | 171  |
| 98   | 123  | 596  | 599  | 490  | 173  | 272  |
| 144  | 226  | 119  | 202  | 194  | 57   | 81   |
| 113  | 351  | 286  | 309  | 640  | 111  | 118  |
| 113  | 351  | 286  | 309  | 640  | 111  | 118  |
| 109  | 118  | 203  | 279  | 305  | 27   | 85   |
| 228  | 194  | 233  | 373  | 339  | 52   | 165  |
| 254  | 278  | 176  | 508  | 437  | 182  | 212  |
| 355  | 632  | 386  | 277  | 162  | 35   | 160  |

|     |     |     |     |     |     |     |
|-----|-----|-----|-----|-----|-----|-----|
| 160 | 148 | 121 | 142 | 312 | 51  | 120 |
| 26  | 45  | 33  | 22  | 71  | 5   | 15  |
| 193 | 109 | 316 | 490 | 442 | 217 | 130 |
| 161 | 103 | 368 | 223 | 330 | 42  | 345 |
| 247 | 261 | 310 | 326 | 367 | 76  | 178 |
| 106 | 149 | 628 | 632 | 248 | 48  | 184 |
| 112 | 85  | 313 | 675 | 304 | 145 | 168 |
| 67  | 48  | 453 | 736 | 436 | 77  | 457 |
| 120 | 208 | 156 | 110 | 319 | 76  | 61  |
| 73  | 203 | 368 | 354 | 402 | 42  | 135 |
| 115 | 113 | 339 | 426 | 331 | 43  | 169 |
| 72  | 116 | 95  | 57  | 124 | 31  | 25  |
| 114 | 110 | 268 | 239 | 282 | 60  | 99  |
| 112 | 85  | 107 | 263 | 89  | 12  | 89  |
| 142 | 132 | 97  | 144 | 132 | 39  | 75  |
| 113 | 153 | 215 | 158 | 240 | 42  | 92  |
| 120 | 143 | 302 | 287 | 252 | 26  | 131 |
| 124 | 100 | 191 | 267 | 166 | 42  | 125 |
| 134 | 111 | 184 | 258 | 366 | 48  | 146 |
| 82  | 90  | 123 | 122 | 93  | 61  | 61  |
| 113 | 93  | 193 | 118 | 252 | 57  | 100 |
| 7   | 15  | 18  | 21  | 37  | 1   | 17  |
| 97  | 93  | 90  | 208 | 110 | 48  | 83  |
| 160 | 55  | 153 | 250 | 289 | 78  | 88  |
| 121 | 158 | 98  | 133 | 243 | 57  | 56  |
| 54  | 69  | 93  | 232 | 213 | 59  | 90  |
| 125 | 101 | 149 | 204 | 128 | 23  | 97  |
| 48  | 51  | 62  | 73  | 144 | 32  | 37  |
| 58  | 92  | 31  | 97  | 84  | 13  | 37  |
| 119 | 278 | 193 | 159 | 86  | 9   | 73  |
| 97  | 35  | 159 | 207 | 187 | 39  | 87  |
| 399 | 120 | 22  | 5   | 87  | 3   | 12  |
| 61  | 59  | 116 | 341 | 135 | 55  | 80  |
| 41  | 30  | 134 | 233 | 147 | 13  | 86  |
| 58  | 226 | 314 | 409 | 140 | 27  | 57  |
| 133 | 109 | 158 | 173 | 173 | 23  | 100 |
| 57  | 55  | 112 | 234 | 105 | 48  | 91  |
| 12  | 9   | 19  | 11  | 18  | 1   | 5   |
| 49  | 53  | 147 | 199 | 194 | 14  | 64  |
| 76  | 60  | 155 | 237 | 137 | 48  | 102 |
| 33  | 46  | 48  | 58  | 104 | 10  | 28  |
| 30  | 43  | 63  | 84  | 233 | 10  | 32  |
| 73  | 56  | 96  | 127 | 91  | 63  | 66  |
| 118 | 69  | 241 | 227 | 185 | 26  | 115 |
| 35  | 57  | 30  | 105 | 48  | 12  | 24  |
| 40  | 82  | 35  | 10  | 26  | 7   | 12  |
| 54  | 69  | 50  | 125 | 78  | 18  | 37  |
| 103 | 55  | 157 | 118 | 151 | 30  | 96  |
| 33  | 52  | 77  | 111 | 163 | 20  | 18  |
| 53  | 70  | 127 | 114 | 152 | 36  | 82  |
| 49  | 74  | 89  | 139 | 130 | 39  | 48  |
| 16  | 35  | 35  | 36  | 141 | 6   | 11  |
| 68  | 22  | 81  | 106 | 95  | 28  | 42  |
| 43  | 114 | 413 | 441 | 130 | 14  | 106 |
| 45  | 102 | 68  | 141 | 140 | 40  | 44  |
| 68  | 45  | 120 | 69  | 122 | 14  | 64  |
| 53  | 104 | 338 | 405 | 104 | 9   | 103 |
| 41  | 53  | 143 | 233 | 73  | 28  | 97  |
| 21  | 22  | 22  | 20  | 45  | 9   | 14  |

|    |     |     |     |     |    |     |
|----|-----|-----|-----|-----|----|-----|
| 61 | 99  | 641 | 482 | 98  | 15 | 131 |
| 42 | 83  | 13  | 16  | 46  | 16 | 16  |
| 32 | 66  | 351 | 283 | 157 | 47 | 68  |
| 64 | 45  | 84  | 82  | 85  | 45 | 50  |
| 21 | 21  | 21  | 19  | 44  | 9  | 13  |
| 58 | 101 | 409 | 350 | 58  | 16 | 70  |
| 72 | 99  | 117 | 90  | 141 | 20 | 10  |
| 30 | 35  | 169 | 150 | 148 | 30 | 117 |
| 52 | 105 | 366 | 93  | 516 | 55 | 4   |
| 26 | 55  | 4   | 11  | 31  | 1  | 5   |
| 44 | 73  | 103 | 148 | 148 | 17 | 28  |
| 40 | 21  | 71  | 83  | 68  | 90 | 63  |
| 14 | 36  | 261 | 263 | 69  | 21 | 120 |
| 37 | 38  | 94  | 69  | 193 | 11 | 62  |
| 20 | 33  | 12  | 11  | 34  | 6  | 12  |
| 50 | 47  | 31  | 70  | 46  | 20 | 52  |
| 33 | 61  | 84  | 142 | 137 | 11 | 42  |
| 75 | 30  | 33  | 64  | 66  | 26 | 67  |
| 62 | 20  | 77  | 97  | 43  | 23 | 57  |
| 43 | 75  | 37  | 259 | 52  | 23 | 35  |
| 22 | 24  | 97  | 75  | 49  | 23 | 78  |
| 28 | 26  | 125 | 150 | 163 | 15 | 54  |
| 10 | 37  | 12  | 51  | 40  | 3  | 10  |
| 74 | 104 | 327 | 275 | 60  | 11 | 107 |
| 37 | 33  | 46  | 95  | 49  | 15 | 49  |
| 51 | 48  | 80  | 82  | 74  | 13 | 35  |
| 43 | 120 | 120 | 143 | 173 | 20 | 40  |
| 37 | 23  | 38  | 115 | 34  | 17 | 32  |
| 47 | 47  | 109 | 74  | 99  | 14 | 37  |
| 57 | 37  | 52  | 42  | 115 | 20 | 36  |
| 27 | 80  | 67  | 39  | 15  | 2  | 18  |
| 29 | 53  | 61  | 82  | 43  | 20 | 24  |
| 31 | 55  | 44  | 36  | 62  | 12 | 18  |
| 34 | 38  | 78  | 68  | 79  | 38 | 52  |
| 46 | 38  | 87  | 62  | 71  | 15 | 29  |
| 30 | 25  | 18  | 33  | 95  | 8  | 13  |
| 1  | 3   | 0   | 4   | 4   | 0  | 3   |
| 36 | 24  | 29  | 60  | 40  | 8  | 30  |
| 5  | 11  | 6   | 46  | 61  | 1  | 8   |
| 25 | 24  | 37  | 42  | 60  | 8  | 21  |
| 51 | 34  | 55  | 25  | 41  | 3  | 33  |
| 16 | 31  | 40  | 51  | 63  | 4  | 23  |
| 62 | 159 | 96  | 68  | 44  | 4  | 24  |
| 51 | 21  | 61  | 29  | 66  | 19 | 41  |
| 32 | 11  | 45  | 60  | 46  | 10 | 45  |
| 28 | 34  | 50  | 53  | 36  | 20 | 30  |
| 16 | 21  | 102 | 145 | 54  | 21 | 47  |
| 23 | 28  | 35  | 49  | 44  | 2  | 27  |
| 5  | 33  | 25  | 27  | 42  | 1  | 8   |
| 13 | 18  | 47  | 63  | 29  | 16 | 46  |
| 1  | 4   | 6   | 5   | 7   | 0  | 1   |
| 19 | 29  | 90  | 86  | 88  | 10 | 30  |
| 37 | 45  | 43  | 32  | 53  | 9  | 23  |
| 42 | 14  | 26  | 48  | 32  | 1  | 38  |
| 39 | 19  | 44  | 30  | 62  | 5  | 26  |
| 5  | 12  | 27  | 17  | 75  | 6  | 9   |
| 11 | 18  | 14  | 23  | 57  | 8  | 10  |
| 27 | 27  | 48  | 44  | 57  | 9  | 18  |
| 13 | 49  | 111 | 132 | 43  | 3  | 26  |

|    |    |     |     |    |    |    |
|----|----|-----|-----|----|----|----|
| 26 | 15 | 39  | 31  | 36 | 9  | 14 |
| 7  | 15 | 2   | 10  | 13 | 1  | 6  |
| 25 | 22 | 22  | 41  | 58 | 4  | 14 |
| 25 | 22 | 22  | 41  | 58 | 4  | 14 |
| 19 | 47 | 209 | 189 | 33 | 14 | 47 |
| 13 | 16 | 35  | 42  | 21 | 3  | 21 |
| 15 | 14 | 36  | 51  | 50 | 6  | 31 |
| 50 | 74 | 101 | 65  | 30 | 5  | 11 |
| 25 | 24 | 22  | 35  | 54 | 9  | 17 |
| 31 | 14 | 26  | 28  | 82 | 10 | 18 |
| 9  | 17 | 25  | 42  | 47 | 4  | 7  |
| 22 | 22 | 10  | 28  | 24 | 19 | 16 |
| 48 | 18 | 42  | 29  | 18 | 4  | 21 |
| 24 | 12 | 5   | 10  | 50 | 14 | 6  |
| 15 | 4  | 90  | 93  | 37 | 6  | 18 |
| 23 | 32 | 17  | 15  | 31 | 0  | 2  |
| 17 | 22 | 28  | 25  | 38 | 2  | 21 |
| 1  | 1  | 4   | 2   | 3  | 0  | 0  |
| 21 | 24 | 22  | 29  | 35 | 3  | 8  |
| 16 | 11 | 11  | 24  | 32 | 2  | 7  |
| 9  | 8  | 38  | 41  | 42 | 14 | 23 |
| 16 | 16 | 21  | 51  | 37 | 9  | 20 |
| 15 | 11 | 11  | 23  | 32 | 2  | 7  |
| 8  | 3  | 47  | 64  | 37 | 10 | 30 |
| 13 | 22 | 70  | 91  | 26 | 5  | 15 |
| 14 | 35 | 18  | 11  | 10 | 9  | 3  |
| 10 | 20 | 23  | 46  | 22 | 8  | 23 |
| 3  | 1  | 0   | 1   | 2  | 0  | 0  |
| 31 | 12 | 18  | 13  | 25 | 5  | 19 |
| 7  | 13 | 15  | 26  | 12 | 7  | 8  |
| 11 | 1  | 26  | 45  | 14 | 5  | 11 |
| 15 | 25 | 97  | 88  | 30 | 2  | 23 |
| 23 | 25 | 9   | 9   | 18 | 4  | 11 |
| 3  | 1  | 1   | 4   | 1  | 0  | 0  |
| 18 | 14 | 28  | 23  | 18 | 2  | 10 |
| 12 | 22 | 6   | 10  | 29 | 5  | 2  |
| 0  | 0  | 0   | 0   | 0  | 0  | 0  |
| 8  | 14 | 16  | 40  | 11 | 11 | 20 |
| 9  | 4  | 20  | 25  | 44 | 3  | 11 |
| 10 | 8  | 36  | 45  | 33 | 3  | 30 |
| 14 | 18 | 82  | 73  | 10 | 5  | 36 |
| 12 | 16 | 27  | 49  | 19 | 7  | 21 |
| 16 | 30 | 101 | 62  | 20 | 2  | 23 |
| 15 | 3  | 14  | 35  | 20 | 3  | 20 |
| 20 | 16 | 45  | 44  | 35 | 10 | 5  |
| 8  | 14 | 38  | 40  | 21 | 11 | 18 |
| 12 | 19 | 5   | 8   | 28 | 5  | 2  |
| 28 | 42 | 48  | 28  | 10 | 3  | 15 |
| 1  | 1  | 0   | 4   | 2  | 1  | 1  |
| 1  | 14 | 4   | 6   | 11 | 2  | 5  |
| 6  | 7  | 15  | 11  | 31 | 2  | 7  |
| 18 | 8  | 29  | 42  | 34 | 6  | 14 |
| 5  | 7  | 14  | 9   | 14 | 6  | 3  |
| 49 | 12 | 3   | 1   | 17 | 1  | 2  |
| 20 | 28 | 106 | 61  | 22 | 8  | 20 |
| 6  | 19 | 3   | 11  | 13 | 5  | 0  |
| 8  | 9  | 38  | 34  | 8  | 8  | 15 |
| 13 | 9  | 19  | 10  | 18 | 2  | 4  |
| 20 | 23 | 22  | 24  | 29 | 4  | 16 |

|    |    |    |    |    |    |    |
|----|----|----|----|----|----|----|
| 17 | 70 | 11 | 6  | 13 | 0  | 6  |
| 17 | 18 | 85 | 72 | 13 | 2  | 24 |
| 17 | 10 | 25 | 26 | 13 | 7  | 12 |
| 8  | 12 | 25 | 24 | 31 | 9  | 20 |
| 6  | 7  | 6  | 23 | 7  | 13 | 12 |
| 7  | 23 | 11 | 24 | 15 | 8  | 9  |
| 14 | 11 | 9  | 17 | 12 | 6  | 14 |
| 15 | 17 | 11 | 9  | 10 | 4  | 4  |
| 8  | 8  | 33 | 17 | 15 | 8  | 12 |
| 7  | 5  | 18 | 12 | 21 | 0  | 11 |
| 10 | 24 | 14 | 21 | 22 | 3  | 7  |
| 10 | 10 | 26 | 28 | 9  | 6  | 8  |
| 4  | 7  | 2  | 2  | 4  | 1  | 1  |
| 1  | 5  | 6  | 4  | 6  | 1  | 3  |
| 7  | 7  | 4  | 13 | 8  | 2  | 6  |
| 3  | 6  | 17 | 18 | 17 | 2  | 10 |
| 8  | 5  | 9  | 18 | 10 | 6  | 6  |
| 6  | 3  | 29 | 21 | 15 | 3  | 13 |
| 8  | 24 | 18 | 14 | 13 | 0  | 7  |
| 12 | 6  | 13 | 14 | 32 | 7  | 8  |
| 10 | 8  | 25 | 26 | 18 | 9  | 10 |
| 2  | 7  | 4  | 8  | 9  | 2  | 3  |
| 11 | 8  | 12 | 21 | 17 | 4  | 14 |
| 18 | 16 | 81 | 54 | 14 | 3  | 19 |
| 6  | 7  | 27 | 33 | 16 | 15 | 18 |
| 19 | 25 | 38 | 20 | 14 | 2  | 15 |
| 9  | 5  | 1  | 11 | 21 | 0  | 0  |
| 8  | 7  | 20 | 18 | 27 | 6  | 8  |
| 2  | 8  | 6  | 19 | 21 | 4  | 10 |
| 4  | 5  | 14 | 27 | 25 | 1  | 12 |
| 16 | 2  | 7  | 9  | 19 | 7  | 8  |
| 7  | 10 | 17 | 22 | 17 | 1  | 10 |
| 5  | 2  | 4  | 1  | 5  | 0  | 1  |
| 8  | 6  | 17 | 19 | 22 | 8  | 5  |
| 5  | 15 | 4  | 7  | 6  | 0  | 0  |
| 8  | 5  | 9  | 29 | 8  | 6  | 9  |
| 10 | 13 | 14 | 19 | 19 | 8  | 6  |
| 5  | 8  | 16 | 15 | 20 | 8  | 5  |
| 4  | 0  | 33 | 31 | 37 | 5  | 43 |
| 8  | 18 | 10 | 18 | 7  | 1  | 5  |
| 4  | 9  | 5  | 20 | 6  | 2  | 5  |
| 5  | 7  | 10 | 12 | 20 | 15 | 6  |
| 10 | 7  | 18 | 14 | 19 | 2  | 14 |
| 7  | 7  | 9  | 20 | 15 | 4  | 15 |
| 7  | 0  | 8  | 22 | 13 | 10 | 8  |
| 5  | 7  | 19 | 9  | 21 | 4  | 36 |
| 8  | 4  | 3  | 11 | 15 | 1  | 4  |
| 4  | 6  | 8  | 12 | 3  | 1  | 1  |
| 7  | 7  | 5  | 8  | 6  | 0  | 5  |
| 5  | 11 | 8  | 11 | 25 | 7  | 2  |
| 5  | 4  | 16 | 19 | 14 | 7  | 9  |
| 6  | 8  | 5  | 3  | 11 | 2  | 7  |
| 2  | 0  | 3  | 6  | 13 | 6  | 13 |
| 0  | 3  | 1  | 1  | 3  | 0  | 2  |
| 2  | 4  | 3  | 5  | 6  | 7  | 5  |
| 10 | 4  | 4  | 10 | 11 | 1  | 5  |
| 6  | 8  | 8  | 3  | 13 | 2  | 1  |
| 5  | 9  | 16 | 13 | 14 | 5  | 9  |
| 1  | 16 | 7  | 1  | 7  | 1  | 1  |

|    |    |    |    |    |    |    |
|----|----|----|----|----|----|----|
| 3  | 2  | 6  | 6  | 12 | 1  | 3  |
| 4  | 5  | 9  | 5  | 7  | 0  | 2  |
| 6  | 1  | 2  | 3  | 11 | 1  | 3  |
| 8  | 4  | 20 | 5  | 9  | 0  | 3  |
| 4  | 6  | 11 | 10 | 7  | 5  | 4  |
| 2  | 6  | 2  | 10 | 3  | 1  | 6  |
| 5  | 5  | 17 | 15 | 11 | 2  | 4  |
| 3  | 4  | 1  | 1  | 5  | 0  | 0  |
| 1  | 1  | 2  | 1  | 7  | 0  | 0  |
| 7  | 3  | 13 | 4  | 12 | 3  | 7  |
| 2  | 8  | 5  | 9  | 9  | 0  | 4  |
| 1  | 14 | 26 | 2  | 12 | 4  | 1  |
| 3  | 3  | 10 | 11 | 11 | 4  | 2  |
| 3  | 5  | 8  | 9  | 9  | 2  | 4  |
| 9  | 5  | 3  | 1  | 3  | 8  | 3  |
| 2  | 1  | 1  | 3  | 1  | 0  | 0  |
| 9  | 7  | 26 | 35 | 1  | 4  | 8  |
| 7  | 3  | 7  | 8  | 10 | 2  | 4  |
| 4  | 1  | 12 | 14 | 2  | 4  | 5  |
| 3  | 3  | 9  | 11 | 5  | 3  | 1  |
| 4  | 3  | 10 | 11 | 6  | 10 | 6  |
| 3  | 1  | 5  | 7  | 8  | 7  | 8  |
| 3  | 8  | 4  | 6  | 7  | 3  | 1  |
| 6  | 6  | 32 | 22 | 6  | 1  | 5  |
| 0  | 1  | 8  | 9  | 14 | 2  | 2  |
| 6  | 1  | 10 | 7  | 8  | 6  | 6  |
| 6  | 4  | 4  | 1  | 6  | 2  | 1  |
| 3  | 4  | 2  | 7  | 8  | 2  | 9  |
| 2  | 5  | 9  | 8  | 10 | 3  | 3  |
| 7  | 3  | 0  | 0  | 12 | 1  | 0  |
| 0  | 0  | 4  | 6  | 30 | 0  | 0  |
| 1  | 2  | 4  | 7  | 3  | 2  | 4  |
| 5  | 18 | 11 | 14 | 5  | 1  | 3  |
| 2  | 5  | 5  | 1  | 2  | 1  | 2  |
| 4  | 2  | 6  | 11 | 5  | 0  | 3  |
| 4  | 8  | 13 | 10 | 10 | 4  | 2  |
| 1  | 1  | 0  | 0  | 3  | 0  | 2  |
| 5  | 6  | 7  | 5  | 6  | 1  | 2  |
| 6  | 1  | 5  | 10 | 11 | 0  | 5  |
| 12 | 0  | 4  | 4  | 7  | 0  | 1  |
| 5  | 4  | 1  | 3  | 7  | 2  | 0  |
| 1  | 1  | 10 | 9  | 14 | 3  | 9  |
| 4  | 2  | 0  | 3  | 6  | 0  | 1  |
| 1  | 4  | 1  | 1  | 1  | 2  | 2  |
| 4  | 2  | 10 | 6  | 12 | 0  | 10 |
| 1  | 4  | 20 | 25 | 4  | 1  | 5  |
| 2  | 4  | 10 | 8  | 6  | 2  | 5  |
| 4  | 1  | 3  | 4  | 8  | 3  | 1  |
| 3  | 3  | 11 | 5  | 2  | 6  | 3  |
| 4  | 0  | 7  | 1  | 5  | 2  | 3  |
| 0  | 1  | 0  | 1  | 1  | 0  | 0  |
| 0  | 0  | 2  | 0  | 2  | 0  | 0  |
| 0  | 1  | 0  | 0  | 0  | 0  | 0  |
| 3  | 2  | 4  | 1  | 2  | 0  | 0  |
| 7  | 6  | 3  | 3  | 7  | 1  | 1  |
| 3  | 6  | 11 | 15 | 6  | 0  | 6  |
| 2  | 5  | 3  | 13 | 6  | 0  | 9  |
| 1  | 6  | 11 | 8  | 10 | 5  | 4  |
| 0  | 1  | 0  | 0  | 0  | 0  | 0  |



|    |    |    |    |    |   |    |
|----|----|----|----|----|---|----|
| 3  | 13 | 4  | 8  | 6  | 0 | 1  |
| 3  | 5  | 17 | 13 | 7  | 0 | 1  |
| 0  | 2  | 3  | 0  | 3  | 0 | 0  |
| 1  | 3  | 8  | 6  | 8  | 1 | 4  |
| 3  | 3  | 8  | 12 | 5  | 1 | 4  |
| 3  | 1  | 7  | 6  | 2  | 1 | 3  |
| 2  | 1  | 0  | 0  | 0  | 0 | 0  |
| 12 | 4  | 10 | 0  | 3  | 1 | 1  |
| 0  | 3  | 2  | 4  | 3  | 2 | 1  |
| 4  | 1  | 5  | 8  | 3  | 1 | 5  |
| 2  | 6  | 7  | 2  | 3  | 0 | 1  |
| 0  | 2  | 0  | 0  | 0  | 0 | 0  |
| 3  | 9  | 6  | 3  | 4  | 1 | 2  |
| 6  | 3  | 4  | 9  | 4  | 0 | 2  |
| 2  | 1  | 2  | 2  | 2  | 2 | 0  |
| 7  | 5  | 3  | 3  | 3  | 2 | 2  |
| 2  | 0  | 9  | 10 | 5  | 1 | 12 |
| 4  | 0  | 5  | 7  | 5  | 4 | 1  |
| 3  | 3  | 2  | 3  | 3  | 2 | 1  |
| 3  | 3  | 6  | 0  | 3  | 2 | 1  |
| 1  | 3  | 7  | 20 | 6  | 0 | 3  |
| 0  | 1  | 2  | 6  | 0  | 0 | 1  |
| 1  | 0  | 4  | 5  | 8  | 1 | 2  |
| 1  | 2  | 8  | 10 | 2  | 3 | 7  |
| 3  | 4  | 7  | 2  | 10 | 0 | 2  |
| 4  | 2  | 2  | 5  | 2  | 2 | 4  |
| 0  | 9  | 5  | 7  | 6  | 0 | 1  |
| 1  | 4  | 1  | 0  | 1  | 1 | 0  |
| 5  | 1  | 3  | 4  | 6  | 0 | 3  |
| 2  | 0  | 4  | 4  | 1  | 2 | 1  |
| 1  | 1  | 3  | 5  | 12 | 0 | 3  |
| 1  | 5  | 5  | 5  | 3  | 2 | 6  |
| 0  | 3  | 2  | 0  | 2  | 1 | 1  |
| 0  | 6  | 5  | 6  | 1  | 0 | 3  |
| 0  | 0  | 2  | 3  | 3  | 2 | 3  |
| 8  | 4  | 3  | 3  | 7  | 2 | 2  |
| 2  | 0  | 0  | 4  | 6  | 0 | 3  |
| 1  | 0  | 3  | 7  | 4  | 0 | 3  |
| 2  | 1  | 6  | 15 | 12 | 2 | 4  |
| 1  | 2  | 5  | 10 | 1  | 3 | 4  |
| 8  | 1  | 3  | 3  | 7  | 1 | 1  |
| 2  | 1  | 4  | 4  | 5  | 2 | 1  |
| 6  | 2  | 1  | 1  | 7  | 3 | 1  |
| 2  | 1  | 3  | 5  | 1  | 0 | 3  |
| 1  | 4  | 4  | 4  | 1  | 1 | 1  |
| 0  | 1  | 0  | 1  | 0  | 0 | 0  |
| 3  | 2  | 6  | 8  | 11 | 0 | 2  |
| 1  | 3  | 3  | 1  | 1  | 0 | 1  |
| 1  | 0  | 5  | 3  | 2  | 2 | 1  |
| 0  | 2  | 3  | 2  | 4  | 0 | 0  |
| 0  | 0  | 8  | 0  | 3  | 2 | 1  |
| 0  | 1  | 5  | 7  | 2  | 2 | 2  |
| 1  | 2  | 1  | 0  | 1  | 0 | 1  |
| 2  | 2  | 1  | 3  | 0  | 0 | 1  |
| 2  | 3  | 0  | 2  | 3  | 0 | 4  |
| 5  | 2  | 4  | 0  | 2  | 0 | 2  |
| 0  | 0  | 5  | 9  | 9  | 2 | 3  |
| 0  | 1  | 17 | 16 | 5  | 0 | 8  |
| 0  | 0  | 0  | 1  | 3  | 1 | 0  |



|         |         |         |         |         |        |         |
|---------|---------|---------|---------|---------|--------|---------|
| 50      | 51      | 52      | 53      | 54      | 55     | 56      |
| 23      | 24      | 25      | 26      | 27      | 28     | 29      |
| CHR_NP  | CHR_NP  | CHR_NP  | CHR_NP  | CHR_NP  | CHR_NP | CHR_NP  |
| E_5     | E_6     | F_1     | F_35    | F_36    | F_37   | F_38    |
| 1597470 | 1583268 | 2592561 | 3565545 | 2585170 | 976547 | 1738984 |
| CHR_NP  | CHR_NP  | CHR_NP  | CHR_NP  | CHR_NP  | CHR_NP | CHR_NP  |
| 10.93   | 9.29    | 12.83   | 15.87   | 9.89    | 15.48  | 14.23   |
| 2.02    | 2.20    | 3.95    | 3.08    | 3.75    | 2.54   | 3.73    |
| 5.36    | 4.15    | 2.72    | 0.70    | 2.46    | 1.67   | 1.80    |
| 1.35    | 1.14    | 2.44    | 3.06    | 2.56    | 2.44   | 2.43    |
| 2.80    | 3.08    | 1.66    | 1.19    | 1.72    | 1.95   | 2.06    |
| 0.87    | 2.09    | 0.28    | 0.51    | 0.99    | 0.48   | 0.60    |
| 1.57    | 1.54    | 1.14    | 0.81    | 1.94    | 0.88   | 0.96    |
| 0.18    | 0.40    | 0.04    | 0.05    | 0.11    | 0.03   | 0.04    |
| 0.62    | 1.37    | 0.27    | 0.29    | 0.85    | 0.35   | 0.31    |
| 0.42    | 0.52    | 0.42    | 0.55    | 0.48    | 0.49   | 0.48    |
| 0.24    | 0.34    | 0.47    | 0.53    | 0.60    | 0.46   | 0.27    |
| 0.70    | 0.82    | 0.57    | 0.40    | 0.58    | 0.41   | 0.45    |
| 0.26    | 0.28    | 0.35    | 0.29    | 0.58    | 0.34   | 0.19    |
| 0.30    | 0.25    | 0.36    | 0.56    | 0.34    | 0.36   | 0.49    |
| 0.08    | 0.18    | 0.05    | 0.07    | 0.22    | 0.15   | 0.04    |
| 0.43    | 0.27    | 0.37    | 0.25    | 0.40    | 0.43   | 0.18    |
| 0.10    | 0.19    | 0.07    | 0.06    | 0.20    | 0.07   | 0.05    |
| 0.23    | 0.32    | 0.20    | 0.19    | 0.37    | 0.15   | 0.15    |
| 0.17    | 0.23    | 0.10    | 0.07    | 0.21    | 0.09   | 0.10    |
| 0.20    | 0.18    | 0.25    | 0.16    | 0.20    | 0.19   | 0.24    |
| 0.23    | 0.15    | 0.17    | 0.13    | 0.20    | 0.11   | 0.19    |
| 0.11    | 0.12    | 0.14    | 0.15    | 0.18    | 0.08   | 0.12    |
| 0.07    | 0.08    | 0.17    | 0.14    | 0.20    | 0.16   | 0.15    |
| 0.10    | 0.08    | 0.08    | 0.05    | 0.21    | 0.04   | 0.06    |
| 0.06    | 0.12    | 0.03    | 0.02    | 0.08    | 0.03   | 0.03    |
| 0.22    | 0.17    | 0.19    | 0.17    | 0.16    | 0.13   | 0.19    |
| 0.12    | 0.10    | 0.21    | 0.20    | 0.15    | 0.15   | 0.16    |
| 0.06    | 0.08    | 0.02    | 0.07    | 0.04    | 0.06   | 0.01    |
| 0.10    | 0.13    | 0.15    | 0.16    | 0.17    | 0.11   | 0.12    |
| 0.08    | 0.13    | 0.28    | 0.23    | 0.18    | 0.16   | 0.16    |
| 0.19    | 0.20    | 0.06    | 0.04    | 0.16    | 0.07   | 0.05    |
| 0.09    | 0.06    | 0.11    | 0.16    | 0.13    | 0.12   | 0.12    |
| 0.06    | 0.09    | 0.03    | 0.02    | 0.07    | 0.03   | 0.02    |
| 0.01    | 0.03    | 0.02    | 0.02    | 0.04    | 0.02   | 0.01    |
| 0.10    | 0.12    | 0.14    | 0.15    | 0.17    | 0.10   | 0.11    |
| 0.07    | 0.07    | 0.09    | 0.15    | 0.13    | 0.04   | 0.14    |
| 0.06    | 0.11    | 0.07    | 0.07    | 0.06    | 0.07   | 0.06    |
| 0.06    | 0.09    | 0.06    | 0.04    | 0.06    | 0.06   | 0.06    |
| 0.05    | 0.01    | 0.18    | 0.10    | 0.07    | 0.06   | 0.14    |
| 0.06    | 0.03    | 0.05    | 0.04    | 0.04    | 0.18   | 0.05    |
| 0.06    | 0.04    | 0.08    | 0.06    | 0.08    | 0.04   | 0.05    |
| 0.10    | 0.10    | 0.05    | 0.03    | 0.05    | 0.07   | 0.05    |
| 0.08    | 0.06    | 0.08    | 0.09    | 0.08    | 0.05   | 0.09    |
| 0.01    | 0.02    | 0.00    | 0.00    | 0.01    | 0.01   | 0.01    |
| 0.10    | 0.10    | 0.04    | 0.02    | 0.06    | 0.02   | 0.04    |
| 0.07    | 0.08    | 0.09    | 0.06    | 0.06    | 0.10   | 0.05    |
| 0.04    | 0.07    | 0.09    | 0.06    | 0.08    | 0.05   | 0.05    |
| 0.06    | 0.05    | 0.05    | 0.04    | 0.06    | 0.06   | 0.05    |
| 0.00    | 0.01    | 0.00    | 0.00    | 0.00    | 0.00   | 0.00    |
| 0.02    | 0.02    | 0.01    | 0.01    | 0.02    | 0.01   | 0.01    |
| 0.04    | 0.07    | 0.22    | 0.13    | 0.03    | 0.02   | 0.11    |
| 0.03    | 0.03    | 0.03    | 0.03    | 0.08    | 0.01   | 0.02    |

|      |      |      |      |      |      |      |
|------|------|------|------|------|------|------|
| 0.03 | 0.03 | 0.04 | 0.05 | 0.05 | 0.02 | 0.04 |
| 0.02 | 0.02 | 0.02 | 0.01 | 0.03 | 0.03 | 0.02 |
| 0.05 | 0.02 | 0.04 | 0.02 | 0.02 | 0.02 | 0.03 |
| 0.00 | 0.01 | 0.00 | 0.00 | 0.00 | 0.00 | 0.00 |
| 0.04 | 0.03 | 0.03 | 0.02 | 0.05 | 0.02 | 0.03 |
| 0.06 | 0.03 | 0.02 | 0.01 | 0.03 | 0.01 | 0.01 |
| 0.04 | 0.03 | 0.04 | 0.01 | 0.04 | 0.03 | 0.02 |
| 0.02 | 0.02 | 0.05 | 0.03 | 0.04 | 0.02 | 0.08 |
| 0.02 | 0.03 | 0.05 | 0.03 | 0.04 | 0.02 | 0.02 |
| 0.04 | 0.03 | 0.01 | 0.01 | 0.02 | 0.01 | 0.01 |
| 0.00 | 0.01 | 0.00 | 0.00 | 0.00 | 0.00 | 0.00 |
| 0.00 | 0.00 | 0.00 | 0.00 | 0.00 | 0.00 | 0.00 |
| 0.02 | 0.02 | 0.01 | 0.02 | 0.01 | 0.04 | 0.02 |
| 0.01 | 0.02 | 0.01 | 0.01 | 0.02 | 0.01 | 0.01 |
| 0.01 | 0.03 | 0.01 | 0.00 | 0.01 | 0.00 | 0.00 |
| 0.01 | 0.01 | 0.00 | 0.01 | 0.01 | 0.00 | 0.00 |
| 0.02 | 0.02 | 0.01 | 0.01 | 0.04 | 0.01 | 0.01 |
| 0.01 | 0.01 | 0.01 | 0.02 | 0.01 | 0.02 | 0.01 |
| 0.02 | 0.02 | 0.03 | 0.02 | 0.02 | 0.03 | 0.02 |
| 0.02 | 0.01 | 0.01 | 0.02 | 0.01 | 0.04 | 0.02 |
| 0.00 | 0.01 | 0.00 | 0.00 | 0.01 | 0.00 | 0.00 |
| 0.01 | 0.01 | 0.01 | 0.01 | 0.01 | 0.01 | 0.01 |
| 0.03 | 0.02 | 0.01 | 0.01 | 0.02 | 0.01 | 0.01 |
| 0.01 | 0.02 | 0.06 | 0.04 | 0.01 | 0.01 | 0.03 |
| 0.02 | 0.01 | 0.02 | 0.01 | 0.02 | 0.01 | 0.02 |
| 0.01 | 0.01 | 0.03 | 0.04 | 0.02 | 0.01 | 0.04 |
| 0.01 | 0.01 | 0.02 | 0.02 | 0.02 | 0.02 | 0.01 |
| 0.01 | 0.02 | 0.03 | 0.02 | 0.02 | 0.01 | 0.01 |
| 0.01 | 0.01 | 0.01 | 0.01 | 0.01 | 0.01 | 0.01 |
| 0.02 | 0.01 | 0.02 | 0.01 | 0.02 | 0.01 | 0.01 |
| 0.01 | 0.01 | 0.02 | 0.02 | 0.01 | 0.02 | 0.02 |
| 0.01 | 0.01 | 0.00 | 0.00 | 0.02 | 0.00 | 0.00 |
| 0.01 | 0.01 | 0.01 | 0.01 | 0.01 | 0.01 | 0.01 |
| 0.01 | 0.01 | 0.02 | 0.01 | 0.01 | 0.00 | 0.01 |
| 0.01 | 0.01 | 0.02 | 0.01 | 0.01 | 0.02 | 0.01 |
| 0.00 | 0.01 | 0.00 | 0.00 | 0.00 | 0.00 | 0.00 |
| 0.01 | 0.01 | 0.01 | 0.01 | 0.02 | 0.01 | 0.01 |
| 0.00 | 0.00 | 0.01 | 0.02 | 0.01 | 0.02 | 0.01 |
| 0.01 | 0.02 | 0.01 | 0.01 | 0.01 | 0.01 | 0.01 |
| 0.00 | 0.00 | 0.00 | 0.00 | 0.00 | 0.00 | 0.00 |
| 0.01 | 0.01 | 0.01 | 0.00 | 0.01 | 0.01 | 0.01 |
| 0.01 | 0.02 | 0.01 | 0.01 | 0.01 | 0.00 | 0.01 |
| 0.00 | 0.00 | 0.00 | 0.00 | 0.00 | 0.00 | 0.00 |
| 0.01 | 0.01 | 0.01 | 0.01 | 0.01 | 0.01 | 0.01 |
| 0.01 | 0.01 | 0.01 | 0.01 | 0.01 | 0.01 | 0.01 |
| 0.01 | 0.01 | 0.01 | 0.00 | 0.01 | 0.01 | 0.01 |
| 0.00 | 0.00 | 0.00 | 0.00 | 0.00 | 0.00 | 0.00 |
| 0.00 | 0.00 | 0.01 | 0.01 | 0.01 | 0.00 | 0.01 |
| 0.01 | 0.01 | 0.01 | 0.01 | 0.01 | 0.01 | 0.01 |
| 0.01 | 0.01 | 0.01 | 0.00 | 0.01 | 0.01 | 0.01 |
| 0.00 | 0.00 | 0.00 | 0.00 | 0.01 | 0.00 | 0.00 |
| 0.00 | 0.01 | 0.00 | 0.00 | 0.00 | 0.00 | 0.00 |
| 0.00 | 0.00 | 0.00 | 0.00 | 0.00 | 0.00 | 0.00 |
| 0.01 | 0.01 | 0.01 | 0.01 | 0.01 | 0.00 | 0.00 |
| 0.01 | 0.01 | 0.01 | 0.01 | 0.01 | 0.00 | 0.00 |
| 0.00 | 0.01 | 0.00 | 0.00 | 0.01 | 0.00 | 0.00 |
| 0.00 | 0.00 | 0.00 | 0.00 | 0.01 | 0.00 | 0.00 |
| 0.01 | 0.01 | 0.00 | 0.00 | 0.00 | 0.00 | 0.00 |







|       |       |       |       |       |       |       |
|-------|-------|-------|-------|-------|-------|-------|
| 0.06  | 1.55  | -0.64 | -0.61 | 0.51  | -0.48 | -0.56 |
| -0.88 | -0.61 | -0.86 | -0.55 | -0.73 | -0.69 | -0.73 |
| -0.87 | -0.49 | 0.00  | 0.22  | 0.48  | -0.06 | -0.74 |
| 1.84  | 2.95  | 0.67  | -0.78 | 0.77  | -0.69 | -0.37 |
| -0.56 | -0.43 | -0.02 | -0.40 | 1.27  | -0.09 | -0.95 |
| -0.95 | -1.23 | -0.59 | 0.56  | -0.76 | -0.60 | 0.13  |
| -0.65 | -0.19 | -0.80 | -0.70 | 0.01  | -0.31 | -0.81 |
| 0.57  | -0.12 | 0.32  | -0.20 | 0.43  | 0.59  | -0.53 |
| -0.36 | 0.19  | -0.58 | -0.64 | 0.24  | -0.53 | -0.67 |
| 0.15  | 1.00  | -0.13 | -0.25 | 1.50  | -0.67 | -0.59 |
| -0.09 | 0.40  | -0.69 | -0.98 | 0.23  | -0.82 | -0.74 |
| -0.28 | -0.53 | 0.20  | -0.67 | -0.30 | -0.41 | 0.06  |
| 1.25  | -0.08 | 0.17  | -0.42 | 0.65  | -0.74 | 0.59  |
| -0.56 | -0.42 | -0.24 | 0.04  | 0.46  | -1.14 | -0.52 |
| -0.63 | -0.48 | 0.65  | 0.23  | 1.01  | 0.55  | 0.40  |
| -0.19 | -0.33 | -0.40 | -0.68 | 0.88  | -0.75 | -0.57 |
| -0.39 | -0.09 | -0.57 | -0.65 | -0.31 | -0.57 | -0.57 |
| 1.94  | 1.12  | 1.49  | 1.04  | 0.93  | 0.30  | 1.34  |
| -0.22 | -0.62 | 1.17  | 1.00  | 0.23  | 0.22  | 0.28  |
| -0.48 | -0.33 | -0.87 | -0.40 | -0.70 | -0.51 | -0.95 |
| -0.06 | 0.43  | 0.84  | 0.96  | 1.31  | 0.00  | 0.26  |
| -0.52 | 0.59  | 4.20  | 3.01  | 1.71  | 1.37  | 1.36  |
| 2.36  | 2.46  | -0.72 | -1.18 | 1.54  | -0.52 | -0.96 |
| -0.67 | -1.13 | -0.18 | 0.68  | 0.07  | -0.03 | -0.02 |
| 0.01  | 0.48  | -0.42 | -0.56 | 0.17  | -0.51 | -0.54 |
| -0.32 | -0.23 | -0.29 | -0.30 | -0.17 | -0.30 | -0.34 |
| 0.07  | 0.61  | 1.09  | 1.22  | 1.63  | 0.10  | 0.44  |
| -0.46 | -0.46 | -0.34 | 0.03  | -0.09 | -0.61 | -0.01 |
| -0.66 | -0.01 | -0.54 | -0.47 | -0.58 | -0.53 | -0.61 |
| -0.35 | -0.01 | -0.31 | -0.52 | -0.31 | -0.31 | -0.32 |
| -0.57 | -1.03 | 0.92  | 0.03  | -0.35 | -0.42 | 0.50  |
| -0.29 | -0.57 | -0.40 | -0.45 | -0.49 | 0.61  | -0.37 |
| -0.23 | -0.68 | 0.00  | -0.22 | 0.06  | -0.84 | -0.50 |
| 1.05  | 0.83  | -0.56 | -1.15 | -0.45 | 0.08  | -0.46 |
| 0.45  | -0.24 | 0.83  | 0.84  | 0.70  | -0.62 | 1.00  |
| -0.71 | -0.34 | -0.82 | -0.82 | -0.65 | -0.76 | -0.80 |
| 0.82  | 0.83  | -0.54 | -0.98 | -0.08 | -0.91 | -0.49 |
| 1.87  | 2.38  | 3.13  | 1.13  | 1.27  | 4.19  | 0.59  |
| -0.21 | 1.15  | 2.06  | 0.84  | 1.46  | 0.23  | 0.29  |
| 0.27  | -0.08 | 0.07  | -0.33 | 0.29  | 0.43  | -0.06 |
| -0.23 | -0.17 | -0.32 | -0.34 | -0.27 | -0.26 | -0.33 |
| -0.20 | -0.24 | -0.48 | -0.46 | -0.12 | -0.45 | -0.53 |
| 0.43  | 1.90  | 10.02 | 5.09  | -0.16 | -0.85 | 3.87  |
| -0.19 | -0.14 | -0.22 | -0.22 | 1.39  | -0.61 | -0.42 |
| -0.21 | -0.32 | 0.57  | 0.90  | 0.80  | -1.33 | 0.42  |
| -0.45 | -0.57 | -0.40 | -0.87 | -0.12 | 0.10  | -0.37 |
| 1.24  | -0.07 | 0.61  | -0.17 | -0.09 | -0.39 | 0.16  |



|       |       |       |       |       |       |       |
|-------|-------|-------|-------|-------|-------|-------|
| -0.26 | -0.14 | -0.30 | -0.30 | -0.24 | -0.30 | -0.32 |
| 0.57  | 0.13  | -0.04 | -0.40 | 1.67  | -0.86 | 0.15  |
| 2.72  | 0.56  | -0.70 | -1.22 | 0.24  | -0.80 | -0.76 |
| 0.94  | 0.05  | 0.79  | -1.17 | 1.04  | -0.22 | -0.44 |
| -0.55 | -0.51 | 0.23  | -0.23 | 0.10  | -0.59 | 0.94  |
| -0.54 | 0.79  | 1.99  | 0.82  | 1.13  | -0.32 | -0.34 |
| 1.14  | 0.41  | -0.89 | -1.00 | -0.07 | -1.02 | -0.80 |
| -0.62 | -0.07 | -0.54 | -0.54 | -0.54 | -0.60 | -0.52 |
| -0.13 | -0.14 | -0.20 | -0.24 | -0.24 | -0.24 | -0.25 |
| -0.62 | -0.73 | -1.05 | -0.28 | -1.16 | 0.47  | -0.70 |
| -0.34 | 0.59  | -0.65 | -0.30 | 0.61  | -1.04 | -0.77 |
| 0.03  | 1.25  | -0.43 | -0.61 | 0.11  | -0.57 | -0.61 |
| -0.49 | 0.16  | -0.63 | -0.36 | -0.02 | -0.77 | -0.66 |
| 0.68  | 0.94  | 0.19  | 0.13  | 2.62  | -0.87 | -0.15 |
| -0.28 | -0.28 | -0.25 | -0.14 | -0.33 | -0.19 | -0.31 |
| -0.31 | -0.21 | 0.31  | 0.12  | 0.24  | 0.32  | -0.19 |
| -0.51 | -0.61 | -0.57 | 0.43  | -0.60 | 1.69  | 0.44  |
| -0.77 | -0.31 | -0.75 | -0.63 | -0.26 | -0.59 | -0.80 |
| -0.01 | 0.13  | -0.21 | -0.09 | 0.03  | -0.38 | -0.19 |
| 2.18  | 1.43  | 0.38  | -0.70 | 1.66  | -0.36 | 0.14  |
| -0.19 | 0.64  | 3.15  | 2.14  | -0.22 | -0.61 | 1.11  |
| 0.15  | -0.15 | 0.53  | -0.02 | 0.52  | -0.44 | 0.68  |
| -0.41 | -0.37 | 0.21  | 0.42  | -0.02 | -0.20 | 0.53  |
| -0.63 | -0.65 | 0.09  | -0.23 | 0.40  | -0.02 | -0.53 |
| -0.58 | 0.52  | 1.11  | 0.63  | 0.65  | -0.66 | -0.05 |
| 0.30  | 0.43  | -0.98 | -0.84 | -0.12 | -0.88 | -0.37 |
| 0.72  | 0.27  | 1.56  | 0.13  | 0.59  | 0.14  | -0.21 |
| -0.44 | -0.61 | 0.30  | 0.23  | -0.52 | 0.04  | 0.16  |
| -0.24 | -0.08 | -0.29 | -0.38 | 0.20  | -0.35 | -0.42 |
| -0.32 | -0.36 | 0.62  | -0.28 | 0.64  | -0.45 | 0.31  |
| 0.41  | 0.80  | 1.31  | 0.33  | 1.02  | -0.86 | -0.14 |
| -0.35 | -0.37 | 1.29  | 0.08  | 0.25  | 1.79  | -0.46 |
| -0.39 | 0.88  | -0.79 | -0.76 | -0.41 | -0.67 | -0.67 |
| 0.96  | 1.05  | -0.14 | -0.73 | 1.81  | 1.22  | -0.88 |
| -0.94 | -0.93 | 0.21  | 0.62  | -0.26 | 0.59  | 0.25  |
| -0.05 | 2.81  | 0.21  | -0.12 | 0.14  | 1.71  | 1.11  |
| -0.23 | -0.18 | -0.23 | -0.17 | -0.26 | -0.27 | -0.26 |
| 1.62  | 0.28  | 0.38  | -0.71 | 1.01  | -0.21 | -0.42 |
| 0.22  | 2.98  | 0.08  | -0.04 | 0.61  | -0.48 | -0.13 |
| -0.23 | 0.16  | -0.50 | -0.41 | 0.09  | -0.51 | -0.47 |
| 0.61  | 0.78  | -0.70 | -0.80 | 0.54  | -0.51 | -0.79 |
| -0.41 | -0.45 | 0.75  | 0.05  | 0.03  | 1.40  | 0.02  |
| 0.02  | -0.41 | -0.16 | -0.24 | -0.11 | 0.60  | -0.44 |
| 0.32  | -0.04 | 0.43  | -0.62 | -0.38 | -0.36 | 0.29  |
| -0.59 | 0.00  | -0.65 | -0.55 | -0.12 | -0.64 | -0.63 |
| -0.36 | -0.33 | 0.48  | 0.50  | 0.01  | -0.73 | 0.14  |
| 1.47  | 1.40  | 1.56  | 1.66  | 1.87  | 0.37  | 1.43  |
| 0.00  | -0.46 | 0.24  | -0.88 | 0.22  | 0.27  | -0.41 |

|       |       |       |       |       |       |       |
|-------|-------|-------|-------|-------|-------|-------|
| -0.45 | -0.29 | -0.43 | -0.40 | -0.22 | -0.47 | -0.45 |
| -0.61 | 0.45  | -1.04 | -0.95 | -0.39 | -0.86 | -0.88 |
| -0.50 | -0.18 | -0.73 | -0.72 | -0.50 | -0.72 | -0.70 |
| 0.21  | 0.32  | 0.85  | 0.33  | 1.12  | -0.26 | -0.35 |
| -0.10 | -0.08 | -0.14 | -0.19 | 0.79  | -0.51 | -0.25 |
| -0.26 | 0.42  | -0.47 | -0.30 | 0.50  | -0.71 | -0.62 |
| -0.34 | 0.51  | -0.71 | -0.61 | 0.60  | -1.04 | -0.75 |
| 0.99  | 2.30  | -0.77 | -1.08 | -0.29 | -0.39 | -0.36 |
| 2.50  | 0.45  | 1.07  | -0.04 | 2.02  | 0.24  | 0.09  |
| -0.42 | -0.45 | 0.23  | 0.17  | 1.06  | -1.05 | -0.07 |
| -0.49 | 0.15  | -0.85 | -0.30 | -0.25 | -0.98 | -0.39 |
| 2.30  | 1.10  | 0.22  | -1.19 | 0.43  | -0.40 | -0.30 |
| -1.23 | -1.00 | 1.16  | 0.25  | 0.59  | 0.36  | 0.09  |
| -0.17 | 0.93  | -1.08 | -0.87 | -0.47 | -0.85 | -1.08 |
| -0.38 | 1.69  | 0.17  | -0.17 | 2.07  | 0.18  | -0.43 |
| -0.38 | 1.69  | 0.17  | -0.17 | 2.07  | 0.18  | -0.43 |
| -0.59 | -0.53 | -0.50 | -0.51 | -0.14 | -0.96 | -0.77 |
| 0.38  | 0.15  | -0.23 | -0.07 | 0.26  | -0.67 | -0.18 |
| 1.08  | 1.43  | -0.70 | 0.75  | 1.32  | 1.58  | 0.34  |
| 1.64  | 3.74  | 0.80  | -0.06 | -0.22 | -0.55 | 0.11  |
| 0.24  | 0.15  | -0.53 | -0.63 | 0.56  | -0.46 | -0.21 |
| -0.20 | -0.06 | -0.24 | -0.32 | -0.06 | -0.33 | -0.29 |
| 0.02  | -0.70 | 0.05  | 0.25  | 0.75  | 1.40  | -0.63 |
| 0.22  | -0.34 | 0.91  | -0.39 | 0.68  | -0.71 | 1.78  |
| 1.06  | 1.25  | 0.50  | 0.00  | 0.88  | -0.24 | 0.18  |
| -0.40 | -0.08 | 1.62  | 0.85  | -0.05 | -0.60 | 0.04  |
| -0.30 | -0.42 | 0.08  | 0.57  | 0.06  | 0.26  | -0.11 |
| -0.19 | -0.34 | 1.63  | 2.03  | 1.55  | 0.30  | 2.79  |
| 0.17  | 1.61  | -0.19 | -0.94 | 1.43  | 0.22  | -0.84 |
| -0.49 | 1.41  | 1.74  | 0.73  | 2.06  | -0.56 | 0.23  |
| -0.19 | -0.19 | 0.58  | 0.41  | 0.55  | -0.55 | 0.13  |
| -0.02 | 0.51  | -0.17 | -0.57 | 0.04  | -0.28 | -0.60 |
| 0.01  | -0.03 | 0.94  | -0.12 | 1.11  | -0.29 | -0.41 |

| 13                                                                                               | 14       | 15         | 16         | 17         | 18         | 19         |
|--------------------------------------------------------------------------------------------------|----------|------------|------------|------------|------------|------------|
| 49                                                                                               | 50       | 51         | 52         | 53         | 54         | 55         |
| TTCACAGTGGCT? TCTCTCGGCTCC? GGATATCATCAT? TGAGATGAAGCAC TCGGATCCGTC? ATCACATTGCCA? AATGGCGCCACT? |          |            |            |            |            |            |
| miR-27b-3p                                                                                       | miR-3615 | miR-144-5p | miR-143-3p | miR-127-3p | miR-23a-3p | miR-652-3p |
| 209441                                                                                           | 198175   | 178962     | 177234     | 154285     | 151875     | 143334     |
| -0.04                                                                                            | 0.68     | -0.29      | -0.43      | 2.23       | -0.46      | 2.20       |
| -1.33                                                                                            | -1.33    | -0.29      | -0.55      | 0.39       | -0.31      | 0.05       |
| -0.14                                                                                            | -0.06    | 0.02       | -0.51      | -0.65      | -0.42      | -0.25      |
| -0.64                                                                                            | 0.17     | 0.23       | -0.54      | -1.12      | -0.72      | -0.49      |
| -0.53                                                                                            | -0.81    | -0.33      | -0.61      | 0.66       | 3.79       | 1.26       |
| 0.59                                                                                             | -0.47    | -0.16      | 0.03       | -0.15      | -0.43      | -0.85      |
| -0.01                                                                                            | 0.11     | -0.21      | 0.01       | 0.71       | -0.49      | -0.38      |
| -1.03                                                                                            | 1.49     | -0.29      | -0.44      | -0.53      | -0.64      | -0.64      |
| -0.88                                                                                            | -0.83    | -0.27      | -0.50      | 0.44       | -0.57      | -1.34      |
| -0.82                                                                                            | -1.23    | -0.28      | -0.42      | -0.33      | -0.39      | 0.17       |
| 1.17                                                                                             | -1.04    | -0.30      | 0.48       | -0.49      | 0.41       | -1.24      |
| -1.04                                                                                            | 2.97     | -0.27      | -0.32      | -1.56      | -0.66      | -2.15      |
| 0.87                                                                                             | -0.45    | 0.28       | 3.41       | -1.76      | 2.51       | 0.09       |
| -0.98                                                                                            | 0.26     | -0.31      | -0.50      | 0.41       | -0.67      | -0.53      |
| -0.30                                                                                            | 0.16     | -0.29      | -0.29      | -0.25      | -0.02      | 0.56       |
| 3.48                                                                                             | -0.56    | -0.11      | 0.23       | -0.04      | 0.47       | 0.05       |
| 0.32                                                                                             | -0.09    | -0.34      | -0.45      | 0.63       | -0.19      | 1.12       |
| -0.39                                                                                            | -0.13    | -0.11      | 0.08       | 0.68       | 0.09       | 1.82       |
| 0.07                                                                                             | -0.33    | -0.36      | 0.81       | -0.40      | 0.37       | 0.80       |
| 0.04                                                                                             | -0.22    | 4.92       | 3.08       | -1.63      | 0.06       | -1.00      |

|       |       |       |       |       |       |       |
|-------|-------|-------|-------|-------|-------|-------|
| -0.21 | -0.34 | -0.13 | -0.40 | -0.96 | -0.53 | -0.70 |
| 0.26  | 1.85  | -0.34 | -0.39 | 1.06  | -0.42 | -0.56 |
| -0.05 | 0.78  | -0.24 | -0.19 | -0.36 | -0.47 | 0.49  |
| -0.47 | 1.42  | -0.28 | -0.53 | -0.75 | -0.67 | 1.04  |
| -0.49 | -1.05 | -0.29 | -0.65 | 1.78  | 0.38  | 0.41  |
| 1.62  | -0.37 | -0.26 | -0.42 | 1.21  | 0.35  | 0.72  |
| 0.93  | -0.57 | 0.30  | 0.04  | 0.79  | -0.36 | -0.61 |
| 1.01  | -1.00 | 7.55  | 1.96  | -1.16 | -0.27 | -1.78 |
| 0.88  | -0.70 | -0.25 | 0.99  | 1.59  | 0.10  | -0.81 |
| -0.33 | -0.66 | -0.33 | -0.08 | -0.32 | -0.39 | -0.29 |
| -0.97 | -0.39 | -0.34 | -0.66 | 7.26  | -0.88 | 1.85  |
| 0.89  | -0.92 | -0.35 | 0.02  | 3.08  | -0.17 | 0.14  |
| -0.37 | -1.09 | -0.11 | -0.52 | -0.27 | 4.70  | 0.63  |
| -0.71 | 1.03  | -0.33 | 0.89  | -0.77 | -0.22 | 0.02  |
| -0.96 | 0.94  | -0.30 | 0.19  | -0.37 | 1.20  | 3.90  |
| -0.31 | -0.52 | -0.31 | -0.18 | -1.47 | -0.23 | -1.21 |
| -1.36 | 0.51  | -0.31 | -0.66 | -1.35 | -0.95 | -1.77 |
| -0.49 | -0.84 | -0.35 | 0.97  | 0.17  | 0.70  | -0.06 |
| 1.20  | -1.16 | -0.12 | 1.38  | -0.77 | 1.83  | 1.03  |
| -0.38 | 0.05  | -0.33 | -0.27 | -1.14 | 0.46  | -1.03 |
| 0.63  | 1.30  | -0.35 | 0.12  | 2.27  | 0.03  | 8.39  |
| 7.95  | 5.55  | -0.20 | 1.24  | 6.64  | 0.23  | 28.19 |
| 0.87  | 0.25  | -0.28 | -0.48 | 1.22  | -0.33 | 0.57  |
| 0.98  | 0.30  | -0.21 | 1.07  | -0.99 | 1.56  | 2.20  |
| -0.88 | 1.52  | -0.36 | -0.32 | -0.93 | -0.40 | -0.32 |
| -0.30 | 1.74  | -0.29 | -0.53 | 0.39  | -0.73 | 6.32  |
| 1.61  | -0.79 | -0.19 | 0.53  | 0.07  | 0.97  | -0.61 |
| 0.33  | 1.29  | -0.25 | 0.12  | 0.95  | 0.02  | -0.23 |
| -0.30 | 0.57  | -0.10 | -0.08 | -1.45 | -0.17 | -0.12 |
| -0.21 | 0.27  | -0.23 | -0.20 | 0.43  | -0.19 | -0.21 |
| 1.15  | -0.08 | -0.17 | -0.24 | 1.90  | -0.14 | -0.32 |
| 2.06  | 0.07  | -0.32 | -0.48 | 10.02 | -0.22 | 0.57  |
| 0.84  | -0.33 | -0.34 | -0.46 | 5.09  | -0.22 | 0.90  |
| 1.46  | 0.29  | -0.27 | -0.12 | -0.16 | 1.39  | 0.80  |
| 0.23  | 0.43  | -0.26 | -0.45 | -0.85 | -0.61 | -1.33 |
| 0.29  | -0.06 | -0.33 | -0.53 | 3.87  | -0.42 | 0.42  |
| 0.66  | -0.27 | -0.15 | -0.51 | 4.53  | -0.41 | 0.02  |
| 0.78  | -0.99 | 7.33  | 0.77  | -1.76 | -0.33 | -1.10 |
| -0.35 | 0.69  | -0.30 | -0.53 | 0.82  | -0.19 | 0.24  |
| 0.99  | 0.02  | -0.01 | -0.44 | -1.17 | 0.86  | 1.20  |
| 0.07  | -0.80 | -0.11 | -0.58 | -0.98 | 1.11  | 0.66  |
| 0.38  | -0.74 | 5.92  | 0.96  | -1.71 | -0.52 | -1.50 |
| -0.11 | 0.33  | -0.09 | -0.55 | -1.35 | -0.72 | 0.44  |
| 0.84  | -0.15 | 0.03  | -0.50 | -0.22 | -0.61 | -0.76 |
| 0.13  | -0.72 | 0.15  | -0.46 | -1.58 | -0.46 | -0.83 |
| -1.11 | 2.07  | 0.24  | 1.64  | -1.59 | -0.68 | -1.46 |
| 0.16  | -0.88 | -0.21 | -0.33 | -0.31 | -0.34 | 1.19  |
| -0.86 | -0.68 | -0.36 | -0.47 | -0.99 | 0.10  | 3.19  |
| -0.21 | 0.17  | 1.03  | -0.65 | 0.71  | -0.20 | 0.96  |
| 0.68  | 1.20  | 0.48  | -0.37 | 1.52  | 0.60  | 0.63  |
| -0.30 | 0.83  | 0.20  | -0.38 | 0.29  | -0.70 | -1.14 |
| -1.05 | -0.21 | 0.19  | 4.63  | -1.85 | -0.61 | -1.92 |
| -0.61 | 0.04  | 0.18  | -0.48 | -1.24 | -0.23 | -0.82 |
| -0.71 | -0.21 | 0.01  | 0.72  | -0.67 | 0.58  | -0.19 |
| -0.38 | 6.29  | -0.37 | -0.56 | 4.92  | 0.02  | 36.59 |
| 0.14  | 0.21  | 0.10  | 0.01  | 0.71  | -0.27 | -0.72 |
| -0.43 | -0.62 | -0.37 | 0.06  | -0.24 | 0.40  | 0.87  |
| -0.28 | -0.35 | -0.39 | -0.08 | 1.99  | -0.42 | -1.49 |
| 1.39  | -1.11 | 0.40  | -0.17 | 0.65  | 0.95  | 0.12  |

|       |       |       |       |       |       |       |
|-------|-------|-------|-------|-------|-------|-------|
| 2.31  | -0.92 | -0.19 | -0.08 | -0.66 | 0.94  | -0.83 |
| 0.70  | 0.14  | -0.24 | -0.53 | -1.53 | -0.42 | 0.69  |
| 0.94  | -0.65 | 0.16  | -0.42 | 1.90  | 0.55  | -0.49 |
| -0.19 | 1.86  | -0.21 | 0.06  | -0.23 | -0.38 | -1.72 |
| 0.45  | 0.09  | 4.72  | 3.71  | -0.97 | 0.88  | -0.81 |
| -0.13 | -1.03 | 12.72 | 1.40  | -1.61 | -0.41 | -1.72 |
| 0.38  | 0.11  | -0.30 | 0.29  | -1.04 | 0.08  | -0.60 |
| 0.80  | -0.39 | -0.07 | -0.10 | 0.01  | 0.32  | -0.82 |
| 0.25  | -0.10 | 0.05  | -0.38 | -1.45 | -0.22 | -0.57 |
| 0.29  | -0.27 | -0.27 | 1.48  | -1.20 | 0.19  | -1.06 |
| 0.74  | -0.43 | -0.27 | -0.39 | -1.21 | 0.29  | -0.28 |
| -0.02 | -0.55 | 0.71  | 1.87  | -0.79 | -0.28 | -1.49 |
| -0.32 | 0.20  | -0.29 | -0.23 | 0.19  | -0.57 | -1.06 |
| 0.49  | 0.09  | -0.19 | -0.29 | 0.80  | -0.44 | -0.53 |
| 1.91  | -0.71 | -0.11 | -0.29 | -0.76 | -0.21 | -0.60 |
| 3.44  | -0.42 | -0.16 | -0.43 | 1.12  | -0.28 | 2.02  |

|      |      |              |            |          |      |      |
|------|------|--------------|------------|----------|------|------|
| 1    | 1    | TATTGCACTTGT | miR-92a-3p | 46389442 | 1    | -2   |
| 0.00 | 0.00 | 0.00         | 0.00       | 0.00     | 0.00 | 0.00 |
| 1.00 | 1.00 | 1.00         | 1.00       | 1.00     | 1.00 | 1.00 |
| 0.29 | 0.97 | 0.64         | 0.26       | 0.08     | 0.41 | 0.82 |

|               |              |              |               |             |               |              |
|---------------|--------------|--------------|---------------|-------------|---------------|--------------|
| 47            | 48           | 49           | 50            | 51          | 52            | 53           |
| TTACACAGTGGCT | TCTCTCGGCTCC | GGATATCATCAT | TGAGATGAAGCAC | TCGGATCCGTC | ATCACATTGCCAC | AATGGCGCCACT |
| miR-27b-3p    | miR-3615     | miR-144-5p   | miR-143-3p    | miR-127-3p  | miR-23a-3p    | miR-652-3p   |
| 209441        | 198175       | 178962       | 177234        | 154285      | 151875        | 143334       |
| -0.04         | 0.68         | -0.29        | -0.43         | 2.23        | -0.46         | 2.20         |
| -1.33         | -1.33        | -0.29        | -0.55         | 0.39        | -0.31         | 0.05         |
| -0.14         | -0.06        | 0.02         | -0.51         | -0.65       | -0.42         | -0.25        |
| -0.64         | 0.17         | 0.23         | -0.54         | -1.12       | -0.72         | -0.49        |
| -0.53         | -0.81        | -0.33        | -0.61         | 0.66        | 3.79          | 1.26         |
| 0.59          | -0.47        | -0.16        | 0.03          | -0.15       | -0.43         | -0.85        |
| -0.01         | 0.11         | -0.21        | 0.01          | 0.71        | -0.49         | -0.38        |
| -1.03         | 1.49         | -0.29        | -0.44         | -0.53       | -0.64         | -0.64        |
| -0.88         | -0.83        | -0.27        | -0.50         | 0.44        | -0.57         | -1.34        |
| -0.82         | -1.23        | -0.28        | -0.42         | -0.33       | -0.39         | 0.17         |
| 1.17          | -1.04        | -0.30        | 0.48          | -0.49       | 0.41          | -1.24        |
| -1.04         | 2.97         | -0.27        | -0.32         | -1.56       | -0.66         | -2.15        |
| 0.87          | -0.45        | 0.28         | 3.41          | -1.76       | 2.51          | 0.09         |
| -0.98         | 0.26         | -0.31        | -0.50         | 0.41        | -0.67         | -0.53        |
| -0.30         | 0.16         | -0.29        | -0.29         | -0.25       | -0.02         | 0.56         |
| 3.48          | -0.56        | -0.11        | 0.23          | -0.04       | 0.47          | 0.05         |
| 0.32          | -0.09        | -0.34        | -0.45         | 0.63        | -0.19         | 1.12         |
| -0.39         | -0.13        | -0.11        | 0.08          | 0.68        | 0.09          | 1.82         |
| 0.07          | -0.33        | -0.36        | 0.81          | -0.40       | 0.37          | 0.80         |
| 0.04          | -0.22        | 4.92         | 3.08          | -1.63       | 0.06          | -1.00        |
| -0.21         | -0.34        | -0.13        | -0.40         | -0.96       | -0.53         | -0.70        |
| 0.26          | 1.85         | -0.34        | -0.39         | 1.06        | -0.42         | -0.56        |
| -0.05         | 0.78         | -0.24        | -0.19         | -0.36       | -0.47         | 0.49         |
| -0.47         | 1.42         | -0.28        | -0.53         | -0.75       | -0.67         | 1.04         |
| -0.49         | -1.05        | -0.29        | -0.65         | 1.78        | 0.38          | 0.41         |
| 1.62          | -0.37        | -0.26        | -0.42         | 1.21        | 0.35          | 0.72         |
| 0.93          | -0.57        | 0.30         | 0.04          | 0.79        | -0.36         | -0.61        |
| 1.01          | -1.00        | 7.55         | 1.96          | -1.16       | -0.27         | -1.78        |

|       |       |       |       |       |       |       |
|-------|-------|-------|-------|-------|-------|-------|
| 0.88  | -0.70 | -0.25 | 0.99  | 1.59  | 0.10  | -0.81 |
| -0.33 | -0.66 | -0.33 | -0.08 | -0.32 | -0.39 | -0.29 |
| -0.97 | -0.39 | -0.34 | -0.66 | 7.26  | -0.88 | 1.85  |
| 0.89  | -0.92 | -0.35 | 0.02  | 3.08  | -0.17 | 0.14  |
| -0.37 | -1.09 | -0.11 | -0.52 | -0.27 | 4.70  | 0.63  |
| -0.71 | 1.03  | -0.33 | 0.89  | -0.77 | -0.22 | 0.02  |
| -0.96 | 0.94  | -0.30 | 0.19  | -0.37 | 1.20  | 3.90  |
| -0.31 | -0.52 | -0.31 | -0.18 | -1.47 | -0.23 | -1.21 |
| -1.36 | 0.51  | -0.31 | -0.66 | -1.35 | -0.95 | -1.77 |
| -0.49 | -0.84 | -0.35 | 0.97  | 0.17  | 0.70  | -0.06 |
| 1.20  | -1.16 | -0.12 | 1.38  | -0.77 | 1.83  | 1.03  |
| -0.38 | 0.05  | -0.33 | -0.27 | -1.14 | 0.46  | -1.03 |
| 0.63  | 1.30  | -0.35 | 0.12  | 2.27  | 0.03  | 8.39  |
| 7.95  | 5.55  | -0.20 | 1.24  | 6.64  | 0.23  | 28.19 |
| 0.87  | 0.25  | -0.28 | -0.48 | 1.22  | -0.33 | 0.57  |
| 0.98  | 0.30  | -0.21 | 1.07  | -0.99 | 1.56  | 2.20  |
| -0.88 | 1.52  | -0.36 | -0.32 | -0.93 | -0.40 | -0.32 |
| -0.30 | 1.74  | -0.29 | -0.53 | 0.39  | -0.73 | 6.32  |
| 1.61  | -0.79 | -0.19 | 0.53  | 0.07  | 0.97  | -0.61 |
| 0.33  | 1.29  | -0.25 | 0.12  | 0.95  | 0.02  | -0.23 |
| -0.30 | 0.57  | -0.10 | -0.08 | -1.45 | -0.17 | -0.12 |
| -0.21 | 0.27  | -0.23 | -0.20 | 0.43  | -0.19 | -0.21 |
| 1.15  | -0.08 | -0.17 | -0.24 | 1.90  | -0.14 | -0.32 |
| 2.06  | 0.07  | -0.32 | -0.48 | 10.02 | -0.22 | 0.57  |
| 0.84  | -0.33 | -0.34 | -0.46 | 5.09  | -0.22 | 0.90  |
| 1.46  | 0.29  | -0.27 | -0.12 | -0.16 | 1.39  | 0.80  |
| 0.23  | 0.43  | -0.26 | -0.45 | -0.85 | -0.61 | -1.33 |
| 0.29  | -0.06 | -0.33 | -0.53 | 3.87  | -0.42 | 0.42  |
| 0.66  | -0.27 | -0.15 | -0.51 | 4.53  | -0.41 | 0.02  |
| 0.78  | -0.99 | 7.33  | 0.77  | -1.76 | -0.33 | -1.10 |
| -0.35 | 0.69  | -0.30 | -0.53 | 0.82  | -0.19 | 0.24  |
| 0.99  | 0.02  | -0.01 | -0.44 | -1.17 | 0.86  | 1.20  |
| 0.07  | -0.80 | -0.11 | -0.58 | -0.98 | 1.11  | 0.66  |
| 0.38  | -0.74 | 5.92  | 0.96  | -1.71 | -0.52 | -1.50 |
| -0.11 | 0.33  | -0.09 | -0.55 | -1.35 | -0.72 | 0.44  |
| 0.84  | -0.15 | 0.03  | -0.50 | -0.22 | -0.61 | -0.76 |
| 0.13  | -0.72 | 0.15  | -0.46 | -1.58 | -0.46 | -0.83 |
| -1.11 | 2.07  | 0.24  | 1.64  | -1.59 | -0.68 | -1.46 |
| 0.16  | -0.88 | -0.21 | -0.33 | -0.31 | -0.34 | 1.19  |
| -0.86 | -0.68 | -0.36 | -0.47 | -0.99 | 0.10  | 3.19  |
| -0.21 | 0.17  | 1.03  | -0.65 | 0.71  | -0.20 | 0.96  |
| 0.68  | 1.20  | 0.48  | -0.37 | 1.52  | 0.60  | 0.63  |
| -0.30 | 0.83  | 0.20  | -0.38 | 0.29  | -0.70 | -1.14 |
| -1.05 | -0.21 | 0.19  | 4.63  | -1.85 | -0.61 | -1.92 |
| -0.61 | 0.04  | 0.18  | -0.48 | -1.24 | -0.23 | -0.82 |
| -0.71 | -0.21 | 0.01  | 0.72  | -0.67 | 0.58  | -0.19 |
| -0.38 | 6.29  | -0.37 | -0.56 | 4.92  | 0.02  | 36.59 |
| 0.14  | 0.21  | 0.10  | 0.01  | 0.71  | -0.27 | -0.72 |
| -0.43 | -0.62 | -0.37 | 0.06  | -0.24 | 0.40  | 0.87  |
| -0.28 | -0.35 | -0.39 | -0.08 | 1.99  | -0.42 | -1.49 |
| 1.39  | -1.11 | 0.40  | -0.17 | 0.65  | 0.95  | 0.12  |
| 2.31  | -0.92 | -0.19 | -0.08 | -0.66 | 0.94  | -0.83 |
| 0.70  | 0.14  | -0.24 | -0.53 | -1.53 | -0.42 | 0.69  |
| 0.94  | -0.65 | 0.16  | -0.42 | 1.90  | 0.55  | -0.49 |
| -0.19 | 1.86  | -0.21 | 0.06  | -0.23 | -0.38 | -1.72 |
| 0.45  | 0.09  | 4.72  | 3.71  | -0.97 | 0.88  | -0.81 |
| -0.13 | -1.03 | 12.72 | 1.40  | -1.61 | -0.41 | -1.72 |
| 0.38  | 0.11  | -0.30 | 0.29  | -1.04 | 0.08  | -0.60 |
| 0.80  | -0.39 | -0.07 | -0.10 | 0.01  | 0.32  | -0.82 |

|       |       |       |       |       |       |       |
|-------|-------|-------|-------|-------|-------|-------|
| 0.25  | -0.10 | 0.05  | -0.38 | -1.45 | -0.22 | -0.57 |
| 0.29  | -0.27 | -0.27 | 1.48  | -1.20 | 0.19  | -1.06 |
| 0.74  | -0.43 | -0.27 | -0.39 | -1.21 | 0.29  | -0.28 |
| -0.02 | -0.55 | 0.71  | 1.87  | -0.79 | -0.28 | -1.49 |
| -0.32 | 0.20  | -0.29 | -0.23 | 0.19  | -0.57 | -1.06 |
| 0.49  | 0.09  | -0.19 | -0.29 | 0.80  | -0.44 | -0.53 |
| 1.91  | -0.71 | -0.11 | -0.29 | -0.76 | -0.21 | -0.60 |
| 3     | 0     | 0     | 0     | 1     | 0     | 2     |

---

| 47          | 48        | 49            | 50           | 51            | 52          | 53           |              |
|-------------|-----------|---------------|--------------|---------------|-------------|--------------|--------------|
| 94          | 29        | 17            | 35           | 131           | 95          | 77           |              |
| CAGT        | GCAATGTTT | TCGAGGAGCTCAC | TTCAAGTAATTC | TCGAGGAGCTCAC | AATGCACCCGG | TAGCAGCACATA | ATGCACCTGGGC |
| miR-130a-3p | miR-151b  | miR-26b-5p    | miR-151a-5p  | miR-501-3p    | miR-15a-5p  | miR-500a-3p  |              |
| 30537       | 500966    | 1034642       | 454020       | 11405         | 29005       | 65049        |              |
| -0.48       | -0.90     | -0.79         | -1.15        | -0.50         | -0.56       | 0.19         |              |
| -0.85       | 1.14      | -0.15         | 0.25         | 3.21          | -0.70       | -1.38        |              |
| -0.06       | 1.56      | 0.07          | 0.73         | 1.10          | 0.20        | -0.24        |              |
| -0.43       | -0.43     | -0.29         | -0.85        | -0.41         | -0.46       | -0.46        |              |
| -0.38       | 3.04      | 1.51          | 3.24         | -0.35         | -0.24       | -1.70        |              |
| -0.66       | -0.44     | -0.34         | -0.40        | -0.76         | -0.44       | -0.54        |              |
| -0.46       | -0.76     | -0.33         | -0.71        | -0.67         | -0.40       | -0.83        |              |
| -0.87       | -1.54     | -0.80         | -1.52        | -0.41         | -0.57       | -0.71        |              |
| -0.70       | 0.09      | -0.64         | 0.23         | -0.46         | -0.48       | 0.46         |              |
| -0.65       | -0.13     | -0.38         | -0.07        | 0.04          | -0.13       | -0.03        |              |
| -0.11       | 1.55      | 0.01          | 1.75         | -0.76         | -0.04       | 0.84         |              |
| -0.76       | -1.02     | -0.69         | -0.98        | -0.65         | -0.50       | -0.82        |              |
| 0.74        | 0.20      | 3.45          | 0.35         | -0.56         | 3.99        | -0.43        |              |
| -0.89       | -1.05     | -0.82         | -0.98        | -0.22         | -0.51       | -0.66        |              |
| 0.84        | -0.16     | 0.02          | -0.08        | -0.12         | 0.00        | 1.68         |              |
| 2.30        | 1.15      | 0.81          | 1.33         | -0.12         | 0.97        | 0.81         |              |
| -0.39       | -0.80     | -0.78         | -0.75        | 0.37          | -0.41       | 2.72         |              |
| 3.20        | -0.08     | -0.24         | 0.02         | -0.64         | 0.47        | 0.37         |              |
| -0.39       | -0.68     | 0.57          | -0.63        | -0.16         | -0.14       | 1.04         |              |
| 0.37        | 0.72      | 1.96          | 0.86         | 2.52          | 2.17        | 0.09         |              |
| -0.07       | 0.45      | -0.30         | 0.63         | -0.07         | -0.32       | -0.77        |              |
| -0.23       | -0.60     | -0.73         | -0.49        | -0.22         | -0.56       | 0.36         |              |
| 0.34        | -0.19     | -0.74         | -0.05        | -0.35         | -0.46       | 0.33         |              |
| -0.55       | -0.77     | -0.86         | -0.69        | -0.42         | -0.50       | 0.07         |              |
| -0.51       | 0.16      | -0.34         | 0.31         | -0.64         | -0.49       | -1.63        |              |
| -0.09       | -0.33     | -0.19         | -0.25        | -0.53         | -0.34       | -0.04        |              |
| 1.73        | -0.16     | 1.00          | -0.09        | 1.79          | 0.46        | 1.27         |              |
| 0.73        | 1.56      | 1.74          | 0.71         | -0.29         | 3.56        | -0.61        |              |
| -0.66       | 0.30      | 0.70          | -0.27        | -0.05         | -0.24       | 1.06         |              |
| -0.73       | -0.31     | -0.30         | -0.72        | -0.01         | -0.43       | 0.22         |              |
| -1.05       | -0.17     | -0.80         | -0.69        | 0.83          | -0.59       | -1.37        |              |
| -0.63       | 1.23      | 0.77          | 0.49         | -0.63         | -0.25       | -1.44        |              |
| -0.02       | 4.25      | 3.42          | 4.56         | -0.76         | -0.07       | -1.73        |              |
| -0.82       | -1.48     | -0.46         | -1.49        | -0.61         | -0.31       | -0.75        |              |
| -0.66       | -1.31     | -0.65         | -1.30        | -0.42         | -0.11       | -0.96        |              |
| -0.53       | -0.90     | -0.32         | -0.84        | -0.56         | -0.48       | -0.58        |              |
| -1.07       | -1.70     | -0.96         | -1.70        | -0.61         | -0.61       | -1.24        |              |
| -0.15       | -1.12     | -0.05         | -1.10        | -0.67         | -0.12       | -0.67        |              |
| 0.52        | -0.54     | 1.30          | -0.46        | -0.27         | 2.56        | -0.71        |              |

|       |       |       |       |       |       |       |
|-------|-------|-------|-------|-------|-------|-------|
| -0.59 | -0.78 | -0.08 | -0.71 | -0.49 | -0.38 | -0.34 |
| -0.94 | -0.89 | -0.76 | -0.85 | 2.77  | -0.33 | 2.99  |
| -0.61 | -0.34 | -0.77 | -0.24 | 2.67  | -0.42 | 5.49  |
| 0.13  | 0.22  | -0.67 | 0.36  | 0.03  | -0.38 | 0.07  |
| 0.26  | -0.49 | 0.76  | -0.44 | -0.51 | 1.02  | 1.14  |
| -0.69 | -0.93 | -0.68 | -0.89 | -0.54 | -0.58 | -0.17 |
| -1.11 | -1.27 | -0.85 | -1.26 | 1.20  | -0.44 | 2.21  |
| 0.86  | 1.67  | 0.85  | 1.95  | 0.02  | 0.41  | 0.78  |
| -0.04 | 0.32  | -0.42 | 0.51  | -0.34 | -0.31 | 0.13  |
| 1.75  | 0.47  | -0.14 | 0.66  | -0.24 | 0.23  | -0.12 |
| 0.22  | -0.06 | -0.36 | 0.07  | -0.19 | -0.23 | 0.15  |
| 2.98  | 0.43  | 0.19  | 0.61  | -0.34 | 0.16  | -0.15 |
| 0.08  | 0.84  | -0.58 | 1.09  | 1.63  | -0.50 | 0.53  |
| -0.04 | 0.96  | -0.64 | 1.22  | 2.03  | -0.41 | -0.02 |
| 0.61  | 1.31  | 0.24  | 1.63  | 1.55  | 0.09  | 0.52  |
| -0.48 | 0.00  | -0.53 | 0.10  | 0.30  | -0.51 | -0.44 |
| -0.13 | 0.26  | -0.67 | 0.44  | 2.79  | -0.47 | 0.68  |
| 0.50  | 0.90  | -0.23 | 1.06  | 0.58  | -0.22 | -0.34 |
| 1.25  | -0.48 | 3.28  | -0.49 | 0.92  | 2.75  | -0.28 |
| -0.29 | -0.75 | -0.37 | -0.67 | -0.55 | -0.62 | -0.83 |
| 0.47  | 0.58  | 1.38  | 0.77  | -0.71 | -0.29 | -1.50 |
| 0.47  | 0.86  | 1.52  | 1.02  | -0.76 | -0.19 | -1.52 |
| 0.78  | 0.17  | 2.50  | 0.25  | 1.92  | 3.23  | 0.07  |
| -0.62 | -0.99 | -0.65 | -0.96 | 5.07  | -0.52 | 0.87  |
| -0.27 | -0.50 | -0.61 | -0.45 | 3.01  | -0.39 | 1.22  |
| 0.34  | 0.45  | 0.33  | 0.50  | 2.10  | -0.18 | 1.34  |
| -0.63 | -0.08 | -0.48 | -0.48 | -0.67 | -0.25 | -0.27 |
| 1.26  | -0.38 | 0.16  | -0.80 | -0.38 | 0.65  | -0.20 |
| 0.32  | 0.86  | -0.29 | 0.23  | -0.25 | -0.70 | -1.76 |
| -0.49 | 3.26  | 0.44  | 2.18  | -0.69 | -0.36 | -1.68 |
| 0.34  | 1.33  | 1.84  | 0.59  | -0.68 | 0.01  | -1.58 |
| -0.32 | -0.89 | -0.26 | -1.17 | -0.52 | -0.40 | -0.68 |
| -0.24 | -1.65 | 0.45  | -1.69 | -0.69 | 2.99  | -1.39 |
| -0.35 | -0.22 | 0.05  | -0.15 | -0.06 | 0.11  | -0.38 |
| 0.18  | -0.14 | 1.04  | -0.03 | -0.46 | 1.07  | -0.90 |
| -0.90 | -1.08 | -0.95 | -1.05 | 4.14  | -0.66 | 2.88  |
| 1.13  | -0.13 | 0.76  | -0.07 | -0.58 | 0.76  | -0.24 |
| -0.54 | -0.26 | 0.23  | -0.19 | -0.38 | -0.39 | -0.29 |
| -0.60 | -0.67 | -0.42 | -0.61 | -0.23 | -0.51 | -0.56 |
| 2.24  | 1.82  | 2.07  | 2.09  | 0.16  | 1.52  | 0.96  |
| 2.25  | 1.78  | 0.97  | 2.10  | 0.13  | 0.42  | 1.41  |
| -0.05 | 0.72  | -0.71 | 0.93  | 0.43  | -0.29 | 0.70  |
| 0.34  | 1.56  | 1.01  | 1.81  | -0.12 | 0.16  | -0.18 |
| 0.17  | -0.20 | -0.73 | -0.03 | -0.31 | -0.33 | -0.12 |
| 0.73  | 0.40  | 1.79  | 0.54  | 3.29  | 2.83  | 0.09  |
| 0.36  | 1.17  | 3.05  | 1.31  | 1.67  | 4.61  | -0.38 |
| 0.64  | 0.84  | -0.34 | 1.06  | -0.32 | 0.07  | 0.28  |
| 0.37  | 0.44  | 1.11  | 0.59  | -0.29 | -0.08 | 0.25  |
| 0.31  | 1.64  | -0.11 | 1.84  | -0.25 | -0.14 | -0.30 |
| 0.25  | -0.30 | 1.81  | -0.21 | 0.25  | 0.56  | 0.40  |
| 0.37  | 1.07  | -0.06 | 1.32  | 0.81  | -0.17 | -0.11 |
| -0.82 | 0.30  | 1.52  | 0.41  | -0.35 | -0.05 | -0.12 |
| -0.75 | -1.13 | -0.32 | -1.10 | -0.19 | -0.52 | -0.57 |
| -0.15 | -0.55 | -0.64 | -0.46 | -0.17 | -0.47 | 0.53  |
| -0.18 | -0.06 | 0.47  | 0.01  | 1.83  | -0.29 | 1.73  |
| -0.23 | -0.35 | -0.07 | -0.31 | 4.53  | 0.02  | 2.33  |
| 0.16  | 0.17  | 0.18  | 0.19  | 0.19  | 0.20  | 0.21  |
| 0.11  | 0.06  | 0.16  | 0.07  | 0.19  | 0.49  | 0.12  |













































































































































































|         |         |         |         |         |         |         |
|---------|---------|---------|---------|---------|---------|---------|
| 3565545 | 2585170 | 976547  | 1738984 | 1856730 | 2304707 | 924323  |
| 57      | 58      | 59      | 60      | 61      | 62      | 63      |
| 27      | 28      | 29      | 30      | 31      | 32      | 33      |
| F_35    | F_36    | F_37    | F_38    | F_39    | G_3     | G_30    |
| CHR_NP  | CHR_NP  | CHR_NP  | CHR_NP  | CHR_NP  | CHR_NP  | CHR_NP  |
| 8303947 | 3677962 | 1611445 | 4566325 | 3689974 | 4454265 | 2666236 |
| 0.12    | 0.01    | 0.45    | 0.82    | 0.90    | 0.11    | 0.67    |
| F_35    | F_36    | F_37    | F_38    | F_39    | G_3     | G_30    |
| 4738402 | 1092792 | 634898  | 2827341 | 1833244 | 2149558 | 1741913 |
| 1755132 | 781741  | 473210  | 768215  | 806882  | 330186  | 233445  |
| 340046  | 296230  | 77703   | 201610  | 135146  | 80730   | 89825   |
| 77296   | 194779  | 50911   | 97414   | 110065  | 70536   | 115590  |
| 338825  | 202546  | 74728   | 131317  | 125806  | 117238  | 76499   |
| 131189  | 135975  | 59576   | 111341  | 81711   | 112000  | 127053  |
| 56016   | 78288   | 14801   | 32212   | 74839   | 337970  | 10312   |
| 90072   | 153035  | 26823   | 51941   | 63278   | 146448  | 43235   |
| 5235    | 8559    | 768     | 2104    | 3826    | 255607  | 1558    |
| 31586   | 66828   | 10588   | 16579   | 46674   | 132537  | 13936   |
| 60382   | 37679   | 15012   | 25734   | 38110   | 54366   | 18696   |
| 58644   | 47412   | 13953   | 14827   | 41760   | 36692   | 9162    |
| 44732   | 45670   | 12668   | 24311   | 29721   | 24843   | 16347   |
| 31789   | 45628   | 10437   | 10434   | 28155   | 59508   | 17309   |
| 62313   | 26495   | 11105   | 26421   | 20767   | 17432   | 13921   |
| 7407    | 17517   | 4647    | 2353    | 10166   | 52787   | 2598    |
| 27797   | 31237   | 13167   | 9460    | 15521   | 4803    | 4535    |
| 6277    | 15435   | 2270    | 2745    | 6990    | 46001   | 2812    |
| 20862   | 29022   | 4473    | 8323    | 11550   | 10033   | 3807    |
| 7956    | 16360   | 2743    | 5304    | 8434    | 36055   | 5974    |
| 18075   | 15799   | 5800    | 12796   | 8110    | 10606   | 9427    |
| 14518   | 15608   | 3396    | 10456   | 6725    | 6812    | 4791    |
| 17013   | 14339   | 2358    | 6331    | 7740    | 10373   | 4887    |
| 15150   | 15827   | 4989    | 8178    | 8362    | 9213    | 3233    |
| 5207    | 16756   | 1222    | 3150    | 2613    | 14634   | 5704    |
| 2223    | 6081    | 1028    | 1837    | 2730    | 21942   | 3822    |
| 18819   | 12991   | 3995    | 10054   | 8563    | 5931    | 2074    |
| 22216   | 12082   | 4650    | 8405    | 8258    | 5835    | 7276    |
| 7872    | 3113    | 1833    | 766     | 4240    | 17088   | 905     |
| 17314   | 13790   | 3271    | 6517    | 8869    | 5601    | 1955    |
| 25514   | 13858   | 4918    | 8664    | 9835    | 4533    | 4091    |
| 4426    | 12369   | 2081    | 2658    | 5727    | 7641    | 2978    |
| 17338   | 9925    | 3677    | 6526    | 4902    | 7556    | 4750    |
| 2521    | 5618    | 786     | 1282    | 2358    | 24953   | 888     |
| 2065    | 3334    | 537     | 549     | 1062    | 29276   | 428     |
| 16461   | 13215   | 3026    | 6156    | 8196    | 4940    | 1840    |
| 16417   | 10148   | 1342    | 7627    | 5392    | 3475    | 3209    |
| 8173    | 5067    | 2086    | 3342    | 4191    | 4920    | 1965    |
| 4628    | 4906    | 1909    | 3313    | 4112    | 6314    | 1628    |
| 11242   | 5566    | 1962    | 7611    | 2147    | 1471    | 3720    |
| 4905    | 3092    | 5354    | 2915    | 1231    | 3845    | 4246    |
| 7186    | 6246    | 1073    | 2774    | 1878    | 754     | 2685    |
| 3350    | 4246    | 2177    | 2881    | 2415    | 4776    | 3557    |
| 9416    | 6452    | 1494    | 4811    | 3437    | 1907    | 1814    |
| 504     | 891     | 212     | 289     | 602     | 12193   | 165     |
| 1799    | 4632    | 598     | 2122    | 1550    | 2408    | 1799    |

|       |      |      |      |      |       |      |
|-------|------|------|------|------|-------|------|
| 6858  | 5056 | 3186 | 2944 | 3330 | 2052  | 1851 |
| 6820  | 6085 | 1422 | 2590 | 3312 | 4089  | 912  |
| 4403  | 4612 | 1915 | 2580 | 2395 | 1343  | 2003 |
| 202   | 302  | 126  | 111  | 417  | 14936 | 82   |
| 1113  | 1973 | 318  | 373  | 468  | 4329  | 205  |
| 14345 | 2557 | 601  | 5781 | 6902 | 192   | 1441 |
| 2976  | 6477 | 409  | 1087 | 1175 | 1566  | 789  |
| 5234  | 3637 | 565  | 2223 | 2076 | 1458  | 1106 |
| 1390  | 2111 | 949  | 1193 | 1007 | 1047  | 484  |
| 2421  | 1850 | 546  | 1509 | 1036 | 3036  | 98   |
| 214   | 272  | 61   | 88   | 182  | 15017 | 37   |
| 2551  | 3851 | 530  | 1617 | 1500 | 1967  | 888  |
| 1030  | 2129 | 438  | 803  | 576  | 2395  | 874  |
| 1644  | 3523 | 844  | 1334 | 1803 | 2163  | 1338 |
| 3551  | 3532 | 566  | 4142 | 2782 | 756   | 1465 |
| 3851  | 3053 | 630  | 1099 | 1315 | 841   | 728  |
| 1101  | 1675 | 297  | 668  | 548  | 1838  | 569  |
| 269   | 194  | 49   | 145  | 361  | 10590 | 42   |
| 147   | 103  | 36   | 52   | 68   | 7637  | 30   |
| 2726  | 739  | 1151 | 933  | 2237 | 529   | 501  |
| 1478  | 1802 | 176  | 462  | 711  | 2897  | 425  |
| 426   | 1076 | 132  | 207  | 642  | 3817  | 206  |
| 754   | 809  | 80   | 200  | 352  | 5979  | 146  |
| 1539  | 2826 | 156  | 618  | 431  | 1258  | 273  |
| 2470  | 619  | 557  | 497  | 1460 | 822   | 128  |
| 2575  | 1968 | 800  | 1021 | 934  | 276   | 482  |
| 2735  | 1136 | 1147 | 1340 | 1169 | 301   | 413  |
| 370   | 576  | 114  | 85   | 330  | 3638  | 101  |
| 1460  | 1111 | 336  | 672  | 875  | 1171  | 252  |
| 601   | 1931 | 249  | 659  | 654  | 1941  | 485  |
| 4764  | 1152 | 298  | 1655 | 3828 | 158   | 929  |
| 1583  | 1483 | 332  | 1087 | 674  | 826   | 218  |
| 4121  | 1625 | 424  | 2238 | 1943 | 744   | 374  |
| 1671  | 1732 | 531  | 635  | 594  | 510   | 643  |
| 2383  | 1721 | 236  | 768  | 636  | 333   | 244  |
| 748   | 824  | 200  | 493  | 683  | 901   | 175  |
| 1459  | 1299 | 405  | 586  | 535  | 321   | 329  |
| 2105  | 859  | 519  | 984  | 579  | 162   | 352  |
| 315   | 1205 | 104  | 101  | 261  | 1138  | 52   |
| 694   | 926  | 161  | 528  | 339  | 1474  | 121  |
| 1177  | 1147 | 120  | 431  | 278  | 359   | 223  |
| 1502  | 1142 | 677  | 586  | 750  | 243   | 411  |
| 170   | 286  | 62   | 110  | 269  | 2775  | 93   |
| 620   | 1201 | 397  | 272  | 558  | 533   | 309  |
| 1863  | 773  | 509  | 749  | 764  | 421   | 581  |
| 825   | 668  | 446  | 661  | 472  | 413   | 257  |
| 84    | 25   | 8    | 17   | 22   | 3259  | 5    |
| 441   | 827  | 179  | 274  | 189  | 359   | 249  |
| 617   | 691  | 103  | 277  | 476  | 810   | 123  |
| 167   | 329  | 31   | 64   | 145  | 1231  | 12   |
| 215   | 689  | 105  | 109  | 235  | 580   | 112  |
| 897   | 634  | 421  | 432  | 395  | 143   | 294  |
| 697   | 524  | 260  | 312  | 342  | 168   | 221  |
| 523   | 454  | 179  | 461  | 321  | 200   | 569  |
| 125   | 237  | 23   | 42   | 176  | 1834  | 26   |
| 962   | 465  | 50   | 359  | 143  | 156   | 132  |
| 1006  | 760  | 181  | 461  | 261  | 414   | 215  |
| 379   | 677  | 270  | 303  | 352  | 326   | 422  |
| 398   | 452  | 84   | 161  | 286  | 1161  | 160  |

|     |     |     |     |     |      |     |
|-----|-----|-----|-----|-----|------|-----|
| 193 | 272 | 62  | 105 | 297 | 721  | 38  |
| 100 | 131 | 27  | 53  | 92  | 1600 | 45  |
| 721 | 723 | 139 | 230 | 260 | 212  | 140 |
| 589 | 953 | 97  | 265 | 298 | 248  | 223 |
| 313 | 421 | 47  | 98  | 205 | 1242 | 39  |
| 213 | 405 | 24  | 84  | 136 | 1682 | 111 |
| 131 | 270 | 96  | 174 | 122 | 556  | 176 |
| 512 | 688 | 158 | 264 | 233 | 223  | 224 |
| 512 | 578 | 29  | 211 | 112 | 114  | 258 |
| 282 | 211 | 26  | 125 | 132 | 821  | 55  |
| 87  | 404 | 88  | 171 | 225 | 417  | 293 |
| 599 | 490 | 173 | 272 | 337 | 147  | 246 |
| 202 | 194 | 57  | 81  | 125 | 683  | 58  |
| 309 | 640 | 111 | 118 | 264 | 531  | 65  |
| 309 | 640 | 111 | 118 | 264 | 531  | 65  |
| 279 | 305 | 27  | 85  | 97  | 228  | 101 |
| 373 | 339 | 52  | 165 | 229 | 152  | 72  |
| 508 | 437 | 182 | 212 | 202 | 58   | 60  |
| 277 | 162 | 35  | 160 | 384 | 101  | 86  |
| 142 | 312 | 51  | 120 | 135 | 99   | 50  |
| 22  | 71  | 5   | 15  | 23  | 2202 | 7   |
| 490 | 442 | 217 | 130 | 207 | 101  | 87  |
| 223 | 330 | 42  | 345 | 175 | 140  | 108 |
| 326 | 367 | 76  | 178 | 204 | 101  | 77  |
| 632 | 248 | 48  | 184 | 80  | 29   | 63  |
| 675 | 304 | 145 | 168 | 150 | 104  | 236 |
| 736 | 436 | 77  | 457 | 184 | 272  | 14  |
| 110 | 319 | 76  | 61  | 122 | 132  | 82  |
| 354 | 402 | 42  | 135 | 160 | 211  | 73  |
| 426 | 331 | 43  | 169 | 111 | 33   | 45  |
| 57  | 124 | 31  | 25  | 74  | 500  | 23  |
| 239 | 282 | 60  | 99  | 126 | 173  | 71  |
| 263 | 89  | 12  | 89  | 106 | 166  | 71  |
| 144 | 132 | 39  | 75  | 129 | 159  | 35  |
| 158 | 240 | 42  | 92  | 129 | 165  | 22  |
| 287 | 252 | 26  | 131 | 77  | 93   | 93  |
| 267 | 166 | 42  | 125 | 77  | 109  | 36  |
| 258 | 366 | 48  | 146 | 158 | 52   | 38  |
| 122 | 93  | 61  | 61  | 32  | 87   | 94  |
| 118 | 252 | 57  | 100 | 79  | 132  | 65  |
| 21  | 37  | 1   | 17  | 19  | 1255 | 3   |
| 208 | 110 | 48  | 83  | 120 | 55   | 47  |
| 250 | 289 | 78  | 88  | 55  | 39   | 85  |
| 133 | 243 | 57  | 56  | 83  | 104  | 79  |
| 232 | 213 | 59  | 90  | 180 | 68   | 45  |
| 204 | 128 | 23  | 97  | 70  | 87   | 78  |
| 73  | 144 | 32  | 37  | 55  | 266  | 43  |
| 97  | 84  | 13  | 37  | 55  | 286  | 33  |
| 159 | 86  | 9   | 73  | 150 | 48   | 17  |
| 207 | 187 | 39  | 87  | 50  | 46   | 103 |
| 5   | 87  | 3   | 12  | 14  | 208  | 119 |
| 341 | 135 | 55  | 80  | 142 | 63   | 34  |
| 233 | 147 | 13  | 86  | 40  | 100  | 65  |
| 409 | 140 | 27  | 57  | 99  | 16   | 38  |
| 173 | 173 | 23  | 100 | 86  | 74   | 47  |
| 234 | 105 | 48  | 91  | 116 | 67   | 21  |
| 11  | 18  | 1   | 5   | 6   | 701  | 4   |
| 199 | 194 | 14  | 64  | 28  | 53   | 50  |
| 237 | 137 | 48  | 102 | 83  | 41   | 48  |

|     |     |    |     |     |     |    |
|-----|-----|----|-----|-----|-----|----|
| 58  | 104 | 10 | 28  | 30  | 248 | 24 |
| 84  | 233 | 10 | 32  | 22  | 168 | 45 |
| 127 | 91  | 63 | 66  | 101 | 48  | 44 |
| 227 | 185 | 26 | 115 | 62  | 36  | 50 |
| 105 | 48  | 12 | 24  | 27  | 80  | 23 |
| 10  | 26  | 7  | 12  | 15  | 641 | 6  |
| 125 | 78  | 18 | 37  | 97  | 21  | 12 |
| 118 | 151 | 30 | 96  | 49  | 72  | 56 |
| 111 | 163 | 20 | 18  | 108 | 117 | 17 |
| 114 | 152 | 36 | 82  | 96  | 34  | 56 |
| 139 | 130 | 39 | 48  | 65  | 93  | 29 |
| 36  | 141 | 6  | 11  | 19  | 182 | 25 |
| 106 | 95  | 28 | 42  | 6   | 38  | 62 |
| 441 | 130 | 14 | 106 | 441 | 5   | 32 |
| 141 | 140 | 40 | 44  | 78  | 159 | 17 |
| 69  | 122 | 14 | 64  | 31  | 21  | 19 |
| 405 | 104 | 9  | 103 | 304 | 5   | 35 |
| 233 | 73  | 28 | 97  | 51  | 56  | 39 |
| 20  | 45  | 9  | 14  | 36  | 266 | 9  |
| 482 | 98  | 15 | 131 | 302 | 5   | 43 |
| 16  | 46  | 16 | 16  | 28  | 146 | 19 |
| 283 | 157 | 47 | 68  | 119 | 16  | 47 |
| 82  | 85  | 45 | 50  | 35  | 36  | 51 |
| 19  | 44  | 9  | 13  | 35  | 255 | 9  |
| 350 | 58  | 16 | 70  | 207 | 3   | 23 |
| 90  | 141 | 20 | 10  | 93  | 39  | 47 |
| 150 | 148 | 30 | 117 | 60  | 79  | 18 |
| 93  | 516 | 55 | 4   | 6   | 338 | 2  |
| 11  | 31  | 1  | 5   | 15  | 215 | 11 |
| 148 | 148 | 17 | 28  | 40  | 20  | 20 |
| 83  | 68  | 90 | 63  | 62  | 14  | 46 |
| 263 | 69  | 21 | 120 | 86  | 41  | 15 |
| 69  | 193 | 11 | 62  | 70  | 67  | 63 |
| 11  | 34  | 6  | 12  | 1   | 51  | 3  |
| 70  | 46  | 20 | 52  | 41  | 66  | 24 |
| 142 | 137 | 11 | 42  | 31  | 35  | 13 |
| 64  | 66  | 26 | 67  | 88  | 48  | 20 |
| 97  | 43  | 23 | 57  | 14  | 70  | 73 |
| 259 | 52  | 23 | 35  | 42  | 22  | 40 |
| 75  | 49  | 23 | 78  | 22  | 48  | 50 |
| 150 | 163 | 15 | 54  | 76  | 24  | 42 |
| 51  | 40  | 3  | 10  | 19  | 206 | 9  |
| 275 | 60  | 11 | 107 | 134 | 11  | 26 |
| 95  | 49  | 15 | 49  | 23  | 35  | 35 |
| 82  | 74  | 13 | 35  | 44  | 43  | 49 |
| 143 | 173 | 20 | 40  | 27  | 26  | 30 |
| 115 | 34  | 17 | 32  | 54  | 47  | 20 |
| 74  | 99  | 14 | 37  | 21  | 24  | 38 |
| 42  | 115 | 20 | 36  | 40  | 28  | 34 |
| 39  | 15  | 2  | 18  | 46  | 27  | 9  |
| 82  | 43  | 20 | 24  | 48  | 27  | 18 |
| 36  | 62  | 12 | 18  | 54  | 49  | 8  |
| 68  | 79  | 38 | 52  | 32  | 22  | 25 |
| 62  | 71  | 15 | 29  | 43  | 54  | 8  |
| 33  | 95  | 8  | 13  | 22  | 110 | 19 |
| 4   | 4   | 0  | 3   | 3   | 233 | 0  |
| 60  | 40  | 8  | 30  | 18  | 63  | 25 |
| 46  | 61  | 1  | 8   | 11  | 222 | 2  |
| 42  | 60  | 8  | 21  | 40  | 17  | 11 |

|     |    |    |    |     |     |    |
|-----|----|----|----|-----|-----|----|
| 25  | 41 | 3  | 33 | 15  | 39  | 4  |
| 51  | 63 | 4  | 23 | 26  | 30  | 22 |
| 68  | 44 | 4  | 24 | 111 | 10  | 21 |
| 29  | 66 | 19 | 41 | 42  | 24  | 33 |
| 60  | 46 | 10 | 45 | 29  | 32  | 33 |
| 53  | 36 | 20 | 30 | 29  | 25  | 24 |
| 145 | 54 | 21 | 47 | 30  | 12  | 8  |
| 49  | 44 | 2  | 27 | 31  | 33  | 13 |
| 27  | 42 | 1  | 8  | 29  | 69  | 9  |
| 63  | 29 | 16 | 46 | 37  | 15  | 14 |
| 5   | 7  | 0  | 1  | 2   | 251 | 0  |
| 86  | 88 | 10 | 30 | 20  | 7   | 15 |
| 32  | 53 | 9  | 23 | 22  | 63  | 1  |
| 48  | 32 | 1  | 38 | 16  | 32  | 12 |
| 30  | 62 | 5  | 26 | 15  | 14  | 14 |
| 17  | 75 | 6  | 9  | 4   | 29  | 10 |
| 23  | 57 | 8  | 10 | 23  | 67  | 9  |
| 44  | 57 | 9  | 18 | 22  | 23  | 19 |
| 132 | 43 | 3  | 26 | 132 | 8   | 5  |
| 31  | 36 | 9  | 14 | 16  | 18  | 2  |
| 10  | 13 | 1  | 6  | 2   | 74  | 5  |
| 41  | 58 | 4  | 14 | 19  | 15  | 17 |
| 41  | 58 | 4  | 14 | 19  | 15  | 17 |
| 189 | 33 | 14 | 47 | 73  | 2   | 17 |
| 42  | 21 | 3  | 21 | 27  | 11  | 20 |
| 51  | 50 | 6  | 31 | 29  | 55  | 7  |
| 65  | 30 | 5  | 11 | 86  | 3   | 7  |
| 35  | 54 | 9  | 17 | 15  | 26  | 6  |
| 28  | 82 | 10 | 18 | 8   | 19  | 4  |
| 42  | 47 | 4  | 7  | 32  | 15  | 1  |
| 28  | 24 | 19 | 16 | 29  | 39  | 12 |
| 29  | 18 | 4  | 21 | 10  | 31  | 11 |
| 10  | 50 | 14 | 6  | 4   | 20  | 14 |
| 93  | 37 | 6  | 18 | 2   | 56  | 8  |
| 15  | 31 | 0  | 2  | 12  | 30  | 22 |
| 25  | 38 | 2  | 21 | 21  | 26  | 5  |
| 2   | 3  | 0  | 0  | 2   | 269 | 1  |
| 29  | 35 | 3  | 8  | 16  | 17  | 11 |
| 24  | 32 | 2  | 7  | 8   | 35  | 14 |
| 41  | 42 | 14 | 23 | 10  | 16  | 25 |
| 51  | 37 | 9  | 20 | 23  | 19  | 5  |
| 23  | 32 | 2  | 7  | 8   | 28  | 13 |
| 64  | 37 | 10 | 30 | 40  | 9   | 13 |
| 91  | 26 | 5  | 15 | 5   | 5   | 13 |
| 11  | 10 | 9  | 3  | 21  | 37  | 1  |
| 46  | 22 | 8  | 23 | 18  | 12  | 13 |
| 1   | 2  | 0  | 0  | 0   | 145 | 0  |
| 13  | 25 | 5  | 19 | 4   | 19  | 16 |
| 26  | 12 | 7  | 8  | 18  | 17  | 9  |
| 45  | 14 | 5  | 11 | 8   | 19  | 10 |
| 88  | 30 | 2  | 23 | 60  | 3   | 12 |
| 9   | 18 | 4  | 11 | 14  | 44  | 7  |
| 4   | 1  | 0  | 0  | 0   | 120 | 3  |
| 23  | 18 | 2  | 10 | 5   | 18  | 4  |
| 10  | 29 | 5  | 2  | 12  | 47  | 2  |
| 0   | 0  | 0  | 0  | 0   | 0   | 0  |
| 40  | 11 | 11 | 20 | 8   | 14  | 11 |
| 25  | 44 | 3  | 11 | 24  | 12  | 13 |
| 45  | 33 | 3  | 30 | 11  | 8   | 11 |



|    |    |    |    |    |     |    |
|----|----|----|----|----|-----|----|
| 73 | 10 | 5  | 36 | 56 | 1   | 15 |
| 49 | 19 | 7  | 21 | 15 | 12  | 14 |
| 62 | 20 | 2  | 23 | 54 | 0   | 11 |
| 35 | 20 | 3  | 20 | 21 | 21  | 11 |
| 44 | 35 | 10 | 5  | 13 | 1   | 13 |
| 40 | 21 | 11 | 18 | 15 | 1   | 12 |
| 8  | 28 | 5  | 2  | 12 | 36  | 2  |
| 28 | 10 | 3  | 15 | 39 | 3   | 7  |
| 4  | 2  | 1  | 1  | 2  | 88  | 0  |
| 6  | 11 | 2  | 5  | 6  | 62  | 8  |
| 11 | 31 | 2  | 7  | 20 | 14  | 8  |
| 42 | 34 | 6  | 14 | 12 | 12  | 7  |
| 9  | 14 | 6  | 3  | 11 | 29  | 0  |
| 1  | 17 | 1  | 2  | 8  | 11  | 11 |
| 61 | 22 | 8  | 20 | 37 | 4   | 6  |
| 11 | 13 | 5  | 0  | 10 | 25  | 1  |
| 34 | 8  | 8  | 15 | 12 | 9   | 3  |
| 10 | 18 | 2  | 4  | 7  | 28  | 7  |
| 24 | 29 | 4  | 16 | 8  | 13  | 3  |
| 6  | 13 | 0  | 6  | 29 | 6   | 7  |
| 72 | 13 | 2  | 24 | 56 | 1   | 8  |
| 26 | 13 | 7  | 12 | 9  | 7   | 13 |
| 24 | 31 | 9  | 20 | 7  | 6   | 11 |
| 23 | 7  | 13 | 12 | 18 | 8   | 6  |
| 24 | 15 | 8  | 9  | 6  | 15  | 3  |
| 17 | 12 | 6  | 14 | 3  | 10  | 7  |
| 9  | 10 | 4  | 4  | 13 | 8   | 2  |
| 17 | 15 | 8  | 12 | 15 | 3   | 5  |
| 12 | 21 | 0  | 11 | 7  | 3   | 15 |
| 21 | 22 | 3  | 7  | 11 | 10  | 0  |
| 28 | 9  | 6  | 8  | 16 | 5   | 7  |
| 2  | 4  | 1  | 1  | 0  | 24  | 0  |
| 4  | 6  | 1  | 3  | 0  | 41  | 0  |
| 13 | 8  | 2  | 6  | 9  | 20  | 4  |
| 18 | 17 | 2  | 10 | 6  | 10  | 7  |
| 18 | 10 | 6  | 6  | 17 | 6   | 7  |
| 21 | 15 | 3  | 13 | 7  | 7   | 15 |
| 14 | 13 | 0  | 7  | 2  | 14  | 7  |
| 14 | 32 | 7  | 8  | 9  | 7   | 6  |
| 26 | 18 | 9  | 10 | 3  | 1   | 1  |
| 8  | 9  | 2  | 3  | 8  | 24  | 0  |
| 21 | 17 | 4  | 14 | 7  | 5   | 4  |
| 54 | 14 | 3  | 19 | 29 | 4   | 8  |
| 33 | 16 | 15 | 18 | 14 | 1   | 5  |
| 20 | 14 | 2  | 15 | 34 | 2   | 4  |
| 11 | 21 | 0  | 0  | 7  | 0   | 8  |
| 18 | 27 | 6  | 8  | 7  | 7   | 2  |
| 19 | 21 | 4  | 10 | 22 | 9   | 4  |
| 27 | 25 | 1  | 12 | 7  | 4   | 5  |
| 9  | 19 | 7  | 8  | 6  | 8   | 5  |
| 22 | 17 | 1  | 10 | 6  | 5   | 4  |
| 1  | 5  | 0  | 1  | 0  | 101 | 1  |
| 19 | 22 | 8  | 5  | 13 | 4   | 9  |
| 7  | 6  | 0  | 0  | 4  | 25  | 5  |
| 29 | 8  | 6  | 9  | 18 | 9   | 7  |
| 19 | 19 | 8  | 6  | 8  | 3   | 1  |
| 15 | 20 | 8  | 5  | 8  | 4   | 7  |
| 31 | 37 | 5  | 43 | 16 | 27  | 1  |
| 18 | 7  | 1  | 5  | 3  | 4   | 1  |

|    |    |    |    |    |    |   |
|----|----|----|----|----|----|---|
| 20 | 6  | 2  | 5  | 8  | 2  | 0 |
| 12 | 20 | 15 | 6  | 11 | 3  | 0 |
| 14 | 19 | 2  | 14 | 6  | 2  | 0 |
| 20 | 15 | 4  | 15 | 8  | 3  | 9 |
| 22 | 13 | 10 | 8  | 3  | 2  | 7 |
| 9  | 21 | 4  | 36 | 4  | 6  | 4 |
| 11 | 15 | 1  | 4  | 8  | 3  | 2 |
| 12 | 3  | 1  | 1  | 8  | 20 | 2 |
| 8  | 6  | 0  | 5  | 7  | 6  | 0 |
| 11 | 25 | 7  | 2  | 7  | 7  | 2 |
| 19 | 14 | 7  | 9  | 4  | 2  | 5 |
| 3  | 11 | 2  | 7  | 7  | 12 | 3 |
| 6  | 13 | 6  | 13 | 10 | 7  | 0 |
| 1  | 3  | 0  | 2  | 1  | 39 | 1 |
| 5  | 6  | 7  | 5  | 2  | 30 | 4 |
| 10 | 11 | 1  | 5  | 3  | 7  | 0 |
| 3  | 13 | 2  | 1  | 1  | 23 | 3 |
| 13 | 14 | 5  | 9  | 5  | 3  | 8 |
| 1  | 7  | 1  | 1  | 0  | 20 | 2 |
| 6  | 12 | 1  | 3  | 2  | 6  | 1 |
| 5  | 7  | 0  | 2  | 0  | 6  | 3 |
| 3  | 11 | 1  | 3  | 2  | 10 | 4 |
| 5  | 9  | 0  | 3  | 3  | 17 | 4 |
| 10 | 7  | 5  | 4  | 5  | 3  | 2 |
| 10 | 3  | 1  | 6  | 11 | 3  | 3 |
| 15 | 11 | 2  | 4  | 14 | 5  | 3 |
| 1  | 5  | 0  | 0  | 2  | 17 | 0 |
| 1  | 7  | 0  | 0  | 1  | 32 | 0 |
| 4  | 12 | 3  | 7  | 4  | 2  | 6 |
| 9  | 9  | 0  | 4  | 1  | 2  | 7 |
| 2  | 12 | 4  | 1  | 9  | 5  | 4 |
| 11 | 11 | 4  | 2  | 5  | 2  | 0 |
| 9  | 9  | 2  | 4  | 3  | 14 | 0 |
| 1  | 3  | 8  | 3  | 13 | 3  | 2 |
| 3  | 1  | 0  | 0  | 1  | 27 | 0 |
| 35 | 1  | 4  | 8  | 15 | 1  | 7 |
| 8  | 10 | 2  | 4  | 3  | 1  | 5 |
| 14 | 2  | 4  | 5  | 6  | 5  | 1 |
| 11 | 5  | 3  | 1  | 5  | 3  | 3 |
| 11 | 6  | 10 | 6  | 5  | 0  | 1 |
| 7  | 8  | 7  | 8  | 2  | 2  | 0 |
| 6  | 7  | 3  | 1  | 7  | 14 | 1 |
| 22 | 6  | 1  | 5  | 13 | 1  | 2 |
| 9  | 14 | 2  | 2  | 2  | 1  | 5 |
| 7  | 8  | 6  | 6  | 7  | 5  | 3 |
| 1  | 6  | 2  | 1  | 1  | 1  | 5 |
| 7  | 8  | 2  | 9  | 6  | 7  | 1 |
| 8  | 10 | 3  | 3  | 4  | 4  | 4 |
| 0  | 12 | 1  | 0  | 1  | 9  | 4 |
| 6  | 30 | 0  | 0  | 3  | 9  | 0 |
| 7  | 3  | 2  | 4  | 1  | 3  | 4 |
| 14 | 5  | 1  | 3  | 23 | 0  | 2 |
| 1  | 2  | 1  | 2  | 2  | 10 | 0 |
| 11 | 5  | 0  | 3  | 2  | 0  | 1 |
| 10 | 10 | 4  | 2  | 2  | 1  | 1 |
| 0  | 3  | 0  | 2  | 1  | 33 | 0 |
| 5  | 6  | 1  | 2  | 3  | 2  | 3 |
| 10 | 11 | 0  | 5  | 3  | 5  | 1 |
| 4  | 7  | 0  | 1  | 0  | 1  | 7 |

|    |    |   |    |    |    |   |
|----|----|---|----|----|----|---|
| 3  | 7  | 2 | 0  | 5  | 7  | 5 |
| 9  | 14 | 3 | 9  | 3  | 1  | 0 |
| 3  | 6  | 0 | 1  | 0  | 6  | 2 |
| 1  | 1  | 2 | 2  | 0  | 69 | 1 |
| 6  | 12 | 0 | 10 | 3  | 6  | 5 |
| 25 | 4  | 1 | 5  | 4  | 0  | 1 |
| 8  | 6  | 2 | 5  | 4  | 0  | 0 |
| 4  | 8  | 3 | 1  | 3  | 10 | 0 |
| 5  | 2  | 6 | 3  | 3  | 2  | 3 |
| 1  | 5  | 2 | 3  | 0  | 3  | 1 |
| 1  | 1  | 0 | 0  | 1  | 11 | 0 |
| 0  | 2  | 0 | 0  | 1  | 33 | 1 |
| 0  | 0  | 0 | 0  | 0  | 33 | 0 |
| 1  | 2  | 0 | 0  | 2  | 7  | 1 |
| 3  | 7  | 1 | 1  | 2  | 1  | 2 |
| 15 | 6  | 0 | 6  | 2  | 2  | 1 |
| 13 | 6  | 0 | 9  | 3  | 2  | 2 |
| 8  | 10 | 5 | 4  | 6  | 3  | 3 |
| 0  | 0  | 0 | 0  | 1  | 32 | 0 |
| 8  | 6  | 0 | 1  | 11 | 3  | 1 |
| 13 | 7  | 0 | 1  | 11 | 1  | 2 |
| 0  | 3  | 0 | 0  | 0  | 8  | 0 |
| 6  | 8  | 1 | 4  | 4  | 2  | 3 |
| 12 | 5  | 1 | 4  | 0  | 2  | 1 |
| 6  | 2  | 1 | 3  | 6  | 5  | 2 |
| 0  | 0  | 0 | 0  | 0  | 24 | 0 |
| 0  | 3  | 1 | 1  | 0  | 4  | 0 |
| 4  | 3  | 2 | 1  | 5  | 3  | 1 |
| 8  | 3  | 1 | 5  | 1  | 2  | 3 |
| 2  | 3  | 0 | 1  | 2  | 4  | 0 |
| 0  | 0  | 0 | 0  | 0  | 14 | 1 |
| 3  | 4  | 1 | 2  | 3  | 2  | 2 |
| 9  | 4  | 0 | 2  | 2  | 2  | 1 |
| 2  | 2  | 2 | 0  | 2  | 2  | 3 |
| 3  | 3  | 2 | 2  | 0  | 6  | 8 |
| 10 | 5  | 1 | 12 | 3  | 4  | 3 |
| 7  | 5  | 4 | 1  | 1  | 8  | 1 |
| 3  | 3  | 2 | 1  | 7  | 3  | 0 |
| 0  | 3  | 2 | 1  | 0  | 1  | 1 |
| 20 | 6  | 0 | 3  | 8  | 0  | 3 |
| 6  | 0  | 0 | 1  | 4  | 4  | 1 |
| 5  | 8  | 1 | 2  | 5  | 8  | 1 |
| 10 | 2  | 3 | 7  | 0  | 1  | 3 |
| 2  | 10 | 0 | 2  | 4  | 2  | 2 |
| 5  | 2  | 2 | 4  | 1  | 2  | 3 |
| 7  | 6  | 0 | 1  | 14 | 1  | 0 |
| 0  | 1  | 1 | 0  | 3  | 12 | 0 |
| 4  | 6  | 0 | 3  | 0  | 2  | 0 |
| 4  | 1  | 2 | 1  | 1  | 3  | 1 |
| 5  | 12 | 0 | 3  | 4  | 3  | 3 |
| 5  | 3  | 2 | 6  | 3  | 2  | 3 |
| 0  | 2  | 1 | 1  | 2  | 15 | 1 |
| 6  | 1  | 0 | 3  | 2  | 0  | 7 |
| 3  | 3  | 2 | 3  | 1  | 2  | 2 |
| 3  | 7  | 2 | 2  | 0  | 2  | 1 |
| 4  | 6  | 0 | 3  | 2  | 3  | 1 |
| 7  | 4  | 0 | 3  | 0  | 1  | 1 |
| 15 | 12 | 2 | 4  | 2  | 0  | 4 |
| 10 | 1  | 3 | 4  | 1  | 0  | 1 |

|    |    |   |   |    |    |   |
|----|----|---|---|----|----|---|
| 3  | 7  | 1 | 1 | 3  | 3  | 1 |
| 4  | 5  | 2 | 1 | 0  | 5  | 2 |
| 1  | 7  | 3 | 1 | 4  | 1  | 2 |
| 5  | 1  | 0 | 3 | 4  | 0  | 1 |
| 4  | 1  | 1 | 1 | 2  | 2  | 0 |
| 1  | 0  | 0 | 0 | 0  | 15 | 0 |
| 8  | 11 | 0 | 2 | 1  | 3  | 1 |
| 1  | 1  | 0 | 1 | 3  | 6  | 1 |
| 3  | 2  | 2 | 1 | 0  | 2  | 2 |
| 2  | 4  | 0 | 0 | 4  | 0  | 1 |
| 0  | 3  | 2 | 1 | 0  | 1  | 0 |
| 7  | 2  | 2 | 2 | 1  | 2  | 0 |
| 0  | 1  | 0 | 1 | 1  | 18 | 0 |
| 3  | 0  | 0 | 1 | 1  | 5  | 1 |
| 2  | 3  | 0 | 4 | 1  | 6  | 1 |
| 0  | 2  | 0 | 2 | 3  | 1  | 1 |
| 9  | 9  | 2 | 3 | 1  | 0  | 2 |
| 16 | 5  | 0 | 8 | 11 | 1  | 0 |
| 1  | 3  | 1 | 0 | 0  | 4  | 0 |
| 5  | 4  | 0 | 0 | 2  | 0  | 7 |
| 0  | 2  | 0 | 0 | 0  | 5  | 1 |
| 0  | 0  | 0 | 0 | 0  | 11 | 0 |
| 0  | 6  | 0 | 0 | 1  | 6  | 0 |
| 5  | 4  | 0 | 2 | 1  | 0  | 1 |
| 1  | 7  | 0 | 6 | 2  | 0  | 1 |
| 5  | 4  | 1 | 2 | 0  | 0  | 3 |
| 7  | 3  | 1 | 2 | 1  | 0  | 2 |
| 5  | 3  | 1 | 4 | 0  | 0  | 2 |
| 0  | 0  | 0 | 0 | 0  | 16 | 0 |
| 1  | 1  | 1 | 0 | 1  | 5  | 0 |
| 1  | 2  | 1 | 2 | 5  | 2  | 0 |
| 4  | 2  | 2 | 3 | 1  | 1  | 4 |
| 2  | 1  | 2 | 5 | 1  | 2  | 1 |
| 9  | 3  | 0 | 7 | 0  | 0  | 1 |
| 5  | 4  | 0 | 1 | 0  | 1  | 0 |
| 5  | 7  | 2 | 1 | 1  | 0  | 3 |
| 1  | 2  | 0 | 1 | 0  | 2  | 3 |
| 1  | 1  | 1 | 1 | 0  | 3  | 1 |
| 4  | 5  | 0 | 0 | 5  | 1  | 0 |
| 4  | 1  | 0 | 0 | 2  | 2  | 1 |
| 2  | 2  | 1 | 0 | 1  | 4  | 0 |
| 6  | 6  | 1 | 1 | 1  | 2  | 1 |
| 1  | 5  | 3 | 4 | 2  | 0  | 2 |
| 4  | 2  | 1 | 1 | 0  | 1  | 1 |
| 3  | 2  | 1 | 1 | 0  | 1  | 2 |
| 2  | 1  | 0 | 3 | 2  | 1  | 1 |
| 5  | 2  | 5 | 0 | 1  | 3  | 3 |
| 1  | 0  | 1 | 2 | 5  | 1  | 0 |
| 2  | 2  | 1 | 2 | 1  | 2  | 3 |
| 3  | 5  | 1 | 1 | 1  | 2  | 0 |
| 5  | 2  | 0 | 0 | 1  | 1  | 0 |
| 1  | 0  | 0 | 0 | 1  | 5  | 0 |
| 4  | 0  | 0 | 1 | 3  | 3  | 0 |
| 1  | 3  | 1 | 0 | 1  | 2  | 1 |
| 1  | 2  | 2 | 2 | 3  | 0  | 0 |
| 1  | 2  | 1 | 1 | 2  | 2  | 1 |
| 2  | 5  | 0 | 3 | 5  | 2  | 0 |
| 4  | 3  | 2 | 0 | 0  | 1  | 1 |
| 5  | 7  | 2 | 0 | 1  | 4  | 0 |

|         |         |        |         |         |         |         |
|---------|---------|--------|---------|---------|---------|---------|
| 4       | 4       | 0      | 0       | 1       | 1       | 0       |
| 3       | 3       | 0      | 1       | 0       | 1       | 1       |
| 1       | 5       | 0      | 1       | 1       | 2       | 1       |
| 2       | 0       | 0      | 0       | 1       | 2       | 0       |
| 0       | 4       | 0      | 0       | 2       | 1       | 1       |
| 0       | 0       | 0      | 0       | 2       | 12      | 2       |
| 3       | 1       | 1      | 2       | 2       | 1       | 0       |
| 0       | 1       | 0      | 2       | 0       | 0       | 0       |
| 1       | 0       | 2      | 1       | 3       | 1       | 0       |
| 10      | 0       | 0      | 0       | 1       | 0       | 0       |
| 3       | 2       | 0      | 1       | 0       | 0       | 0       |
| 1       | 1       | 0      | 2       | 4       | 0       | 0       |
| 0       | 0       | 0      | 0       | 0       | 0       | 0       |
| F_35    | F_36    | F_37   | F_38    | F_39    | G_3     | G_30    |
| CHR_NP  | CHR_NP  | CHR_NP | CHR_NP  | CHR_NP  | CHR_NP  | CHR_NP  |
| 4738402 | 1092792 | 634898 | 2827341 | 1833244 | 2149558 | 1741913 |
| 18      | 10      | 13     | 20      | 16      | 16      | 21      |
| -0.66   | -2.43   | -1.82  | -0.34   | -1.14   | -1.14   | -0.12   |

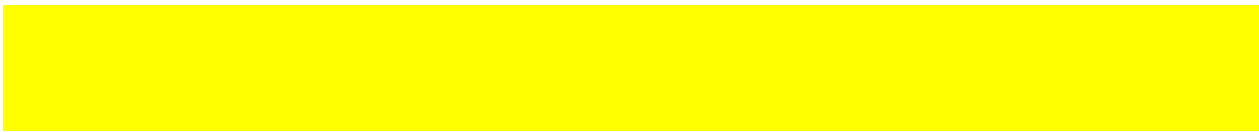

|         |         |        |        |        |         |         |
|---------|---------|--------|--------|--------|---------|---------|
| 0.95    | 0.06    | 0.63   | 0.98   | 0.62   | 0.98    | 0.76    |
| 3       | 33      | 16     | 1      | 17     | 2       | 14      |
| 1       | 1       | 1      | 1      | 1      | 1       | 1       |
| 57      | 58      | 59     | 60     | 61     | 62      | 63      |
| 30      | 31      | 32     | 33     | 34     | 35      | 36      |
| F_39    | G_3     | G_30   | G_31   | G_32   | G_4     | G_5     |
| CHR_NP  | CHR_NP  | CHR_NP | CHR_NP | CHR_NP | CHR_NP  | CHR_NP  |
| 1856730 | 2304707 | 924323 | 555209 | 358914 | 3926455 | 1257195 |
| F_39    | G_3     | G_30   | G_31   | G_32   | G_4     | G_5     |
| 806882  | 330186  | 233445 | 60054  | 27156  | 715360  | 584807  |
| 135146  | 80730   | 89825  | 81885  | 50732  | 166580  | 98444   |
| 110065  | 70536   | 115590 | 43191  | 49624  | 78461   | 70682   |
| 125806  | 117238  | 76499  | 63556  | 41067  | 197923  | 106696  |
| 81711   | 112000  | 127053 | 57366  | 33951  | 151060  | 106970  |
| 74839   | 337970  | 10312  | 24074  | 19272  | 669358  | 14568   |
| 63278   | 146448  | 43235  | 48602  | 33276  | 252380  | 37877   |
| 3826    | 255607  | 1558   | 3955   | 3195   | 304888  | 3580    |
| 46674   | 132537  | 13936  | 10556  | 3738   | 214919  | 10351   |
| 38110   | 54366   | 18696  | 10050  | 4479   | 125897  | 19095   |
| 41760   | 36692   | 9162   | 8857   | 2892   | 58207   | 8865    |
| 29721   | 24843   | 16347  | 12921  | 6828   | 42738   | 20501   |
| 28155   | 59508   | 17309  | 14640  | 9224   | 80893   | 8750    |
| 20767   | 17432   | 13921  | 7451   | 4023   | 33867   | 26210   |
| 10166   | 52787   | 2598   | 6652   | 3420   | 83123   | 1659    |
| 15521   | 4803    | 4535   | 1400   | 588    | 7967    | 7460    |
| 6990    | 46001   | 2812   | 6284   | 4297   | 65216   | 2153    |
| 11550   | 10033   | 3807   | 4796   | 2853   | 18322   | 2596    |
| 8434    | 36055   | 5974   | 5219   | 3205   | 69159   | 4040    |

|      |       |      |      |      |       |      |
|------|-------|------|------|------|-------|------|
| 8110 | 10606 | 9427 | 5029 | 2619 | 17863 | 4956 |
| 6725 | 6812  | 4791 | 2626 | 1310 | 9992  | 3862 |
| 7740 | 10373 | 4887 | 2776 | 1160 | 22460 | 5937 |
| 8362 | 9213  | 3233 | 1742 | 613  | 21293 | 3969 |
| 2613 | 14634 | 5704 | 5429 | 4673 | 17203 | 3609 |
| 2730 | 21942 | 3822 | 2457 | 2791 | 25787 | 1081 |
| 8563 | 5931  | 2074 | 704  | 418  | 7579  | 3527 |
| 8258 | 5835  | 7276 | 3489 | 2027 | 9094  | 7577 |
| 4240 | 17088 | 905  | 1307 | 1126 | 41338 | 2796 |
| 8869 | 5601  | 1955 | 2292 | 1628 | 13657 | 2219 |
| 9835 | 4533  | 4091 | 2173 | 827  | 8205  | 4514 |
| 5727 | 7641  | 2978 | 4003 | 2313 | 11523 | 2645 |
| 4902 | 7556  | 4750 | 2719 | 1774 | 11574 | 6496 |
| 2358 | 24953 | 888  | 1704 | 969  | 38405 | 1508 |
| 1062 | 29276 | 428  | 1210 | 558  | 25718 | 253  |
| 8196 | 4940  | 1840 | 2158 | 1509 | 12423 | 2036 |
| 5392 | 3475  | 3209 | 2703 | 3005 | 9914  | 6992 |
| 4191 | 4920  | 1965 | 2524 | 1494 | 11445 | 1205 |
| 4112 | 6314  | 1628 | 1408 | 2015 | 6517  | 1049 |
| 2147 | 1471  | 3720 | 2049 | 920  | 4721  | 4100 |
| 1231 | 3845  | 4246 | 974  | 466  | 7388  | 6950 |
| 1878 | 754   | 2685 | 1538 | 1136 | 1409  | 1880 |
| 2415 | 4776  | 3557 | 2218 | 1235 | 3723  | 2467 |
| 3437 | 1907  | 1814 | 1232 | 915  | 3808  | 2879 |
| 602  | 12193 | 165  | 563  | 382  | 30204 | 243  |
| 1550 | 2408  | 1799 | 868  | 896  | 2494  | 1098 |
| 3330 | 2052  | 1851 | 1477 | 605  | 2644  | 1214 |
| 3312 | 4089  | 912  | 1093 | 458  | 5914  | 1492 |
| 2395 | 1343  | 2003 | 842  | 276  | 3222  | 2347 |
| 417  | 14936 | 82   | 187  | 88   | 21157 | 350  |
| 468  | 4329  | 205  | 184  | 51   | 8480  | 243  |
| 6902 | 192   | 1441 | 228  | 186  | 444   | 406  |
| 1175 | 1566  | 789  | 1067 | 777  | 1933  | 385  |
| 2076 | 1458  | 1106 | 856  | 476  | 1923  | 1624 |
| 1007 | 1047  | 484  | 310  | 95   | 2091  | 325  |
| 1036 | 3036  | 98   | 18   | 4    | 4507  | 859  |
| 182  | 15017 | 37   | 55   | 19   | 17962 | 108  |
| 1500 | 1967  | 888  | 872  | 667  | 3703  | 1109 |
| 576  | 2395  | 874  | 791  | 386  | 2376  | 683  |
| 1803 | 2163  | 1338 | 1052 | 576  | 1430  | 869  |
| 2782 | 756   | 1465 | 1276 | 911  | 1024  | 1720 |
| 1315 | 841   | 728  | 977  | 534  | 1021  | 605  |
| 548  | 1838  | 569  | 399  | 172  | 1929  | 663  |
| 361  | 10590 | 42   | 94   | 50   | 14472 | 107  |
| 68   | 7637  | 30   | 39   | 55   | 9973  | 52   |
| 2237 | 529   | 501  | 368  | 143  | 1498  | 1372 |
| 711  | 2897  | 425  | 447  | 361  | 5759  | 343  |
| 642  | 3817  | 206  | 352  | 185  | 4518  | 217  |
| 352  | 5979  | 146  | 249  | 220  | 7899  | 207  |
| 431  | 1258  | 273  | 255  | 301  | 731   | 172  |
| 1460 | 822   | 128  | 98   | 77   | 2021  | 730  |
| 934  | 276   | 482  | 474  | 288  | 343   | 551  |
| 1169 | 301   | 413  | 130  | 80   | 483   | 436  |
| 330  | 3638  | 101  | 223  | 122  | 5449  | 73   |
| 875  | 1171  | 252  | 108  | 47   | 2458  | 498  |
| 654  | 1941  | 485  | 669  | 604  | 2152  | 311  |
| 3828 | 158   | 929  | 143  | 469  | 1176  | 209  |
| 674  | 826   | 218  | 36   | 21   | 1775  | 853  |
| 1943 | 744   | 374  | 213  | 217  | 1197  | 1260 |

|     |      |     |     |     |      |     |
|-----|------|-----|-----|-----|------|-----|
| 594 | 510  | 643 | 428 | 234 | 653  | 605 |
| 636 | 333  | 244 | 341 | 219 | 299  | 147 |
| 683 | 901  | 175 | 216 | 144 | 1996 | 315 |
| 535 | 321  | 329 | 55  | 20  | 436  | 401 |
| 579 | 162  | 352 | 283 | 141 | 790  | 627 |
| 261 | 1138 | 52  | 197 | 37  | 1224 | 50  |
| 339 | 1474 | 121 | 238 | 113 | 1906 | 299 |
| 278 | 359  | 223 | 80  | 50  | 339  | 258 |
| 750 | 243  | 411 | 253 | 151 | 470  | 427 |
| 269 | 2775 | 93  | 191 | 152 | 3382 | 92  |
| 558 | 533  | 309 | 323 | 199 | 855  | 176 |
| 764 | 421  | 581 | 292 | 173 | 403  | 334 |
| 472 | 413  | 257 | 128 | 66  | 613  | 346 |
| 22  | 3259 | 5   | 7   | 7   | 5354 | 54  |
| 189 | 359  | 249 | 68  | 37  | 351  | 200 |
| 476 | 810  | 123 | 135 | 87  | 1133 | 106 |
| 145 | 1231 | 12  | 36  | 29  | 2426 | 37  |
| 235 | 580  | 112 | 190 | 154 | 674  | 44  |
| 395 | 143  | 294 | 220 | 93  | 200  | 187 |
| 342 | 168  | 221 | 157 | 50  | 353  | 290 |
| 321 | 200  | 569 | 221 | 162 | 244  | 250 |
| 176 | 1834 | 26  | 84  | 47  | 3797 | 30  |
| 143 | 156  | 132 | 69  | 67  | 250  | 153 |
| 261 | 414  | 215 | 171 | 62  | 833  | 205 |
| 352 | 326  | 422 | 220 | 153 | 318  | 212 |
| 286 | 1161 | 160 | 142 | 169 | 1119 | 143 |
| 297 | 721  | 38  | 103 | 39  | 1575 | 41  |
| 92  | 1600 | 45  | 57  | 37  | 2189 | 69  |
| 260 | 212  | 140 | 137 | 80  | 153  | 106 |
| 298 | 248  | 223 | 208 | 190 | 385  | 142 |
| 205 | 1242 | 39  | 112 | 77  | 1598 | 66  |
| 136 | 1682 | 111 | 99  | 81  | 2438 | 85  |
| 122 | 556  | 176 | 141 | 75  | 574  | 33  |
| 233 | 223  | 224 | 90  | 68  | 236  | 132 |
| 112 | 114  | 258 | 131 | 94  | 236  | 268 |
| 132 | 821  | 55  | 65  | 43  | 2178 | 73  |
| 225 | 417  | 293 | 127 | 75  | 450  | 106 |
| 337 | 147  | 246 | 142 | 64  | 222  | 95  |
| 125 | 683  | 58  | 50  | 18  | 351  | 51  |
| 264 | 531  | 65  | 153 | 105 | 633  | 39  |
| 264 | 531  | 65  | 153 | 105 | 633  | 39  |
| 97  | 228  | 101 | 107 | 120 | 125  | 81  |
| 229 | 152  | 72  | 37  | 10  | 173  | 170 |
| 202 | 58   | 60  | 23  | 16  | 44   | 70  |
| 384 | 101  | 86  | 10  | 19  | 742  | 17  |
| 135 | 99   | 50  | 50  | 22  | 270  | 55  |
| 23  | 2202 | 7   | 11  | 6   | 2055 | 17  |
| 207 | 101  | 87  | 111 | 54  | 162  | 87  |
| 175 | 140  | 108 | 58  | 51  | 174  | 118 |
| 204 | 101  | 77  | 35  | 12  | 116  | 49  |
| 80  | 29   | 63  | 29  | 13  | 38   | 61  |
| 150 | 104  | 236 | 134 | 68  | 65   | 72  |
| 184 | 272  | 14  | 2   | 0   | 753  | 547 |
| 122 | 132  | 82  | 101 | 49  | 165  | 79  |
| 160 | 211  | 73  | 74  | 29  | 336  | 48  |
| 111 | 33   | 45  | 32  | 27  | 79   | 73  |
| 74  | 500  | 23  | 19  | 6   | 555  | 36  |
| 126 | 173  | 71  | 53  | 26  | 152  | 46  |
| 106 | 166  | 71  | 11  | 3   | 320  | 62  |

|     |      |     |    |     |      |     |
|-----|------|-----|----|-----|------|-----|
| 129 | 159  | 35  | 18 | 14  | 257  | 60  |
| 129 | 165  | 22  | 35 | 31  | 392  | 47  |
| 77  | 93   | 93  | 26 | 40  | 76   | 86  |
| 77  | 109  | 36  | 13 | 9   | 161  | 94  |
| 158 | 52   | 38  | 32 | 23  | 129  | 69  |
| 32  | 87   | 94  | 32 | 24  | 108  | 96  |
| 79  | 132  | 65  | 82 | 56  | 223  | 69  |
| 19  | 1255 | 3   | 14 | 7   | 1503 | 8   |
| 120 | 55   | 47  | 22 | 19  | 225  | 103 |
| 55  | 39   | 85  | 51 | 27  | 46   | 66  |
| 83  | 104  | 79  | 79 | 46  | 239  | 42  |
| 180 | 68   | 45  | 41 | 31  | 260  | 128 |
| 70  | 87   | 78  | 32 | 45  | 118  | 116 |
| 55  | 266  | 43  | 26 | 28  | 337  | 26  |
| 55  | 286  | 33  | 24 | 25  | 619  | 36  |
| 150 | 48   | 17  | 2  | 4   | 138  | 5   |
| 50  | 46   | 103 | 50 | 18  | 105  | 94  |
| 14  | 208  | 119 | 35 | 4   | 186  | 44  |
| 142 | 63   | 34  | 24 | 30  | 79   | 84  |
| 40  | 100  | 65  | 53 | 36  | 152  | 71  |
| 99  | 16   | 38  | 17 | 41  | 39   | 41  |
| 86  | 74   | 47  | 22 | 18  | 62   | 33  |
| 116 | 67   | 21  | 4  | 2   | 119  | 110 |
| 6   | 701  | 4   | 13 | 9   | 1268 | 1   |
| 28  | 53   | 50  | 43 | 31  | 65   | 57  |
| 83  | 41   | 48  | 33 | 42  | 83   | 70  |
| 30  | 248  | 24  | 15 | 10  | 300  | 19  |
| 22  | 168  | 45  | 33 | 36  | 193  | 18  |
| 101 | 48   | 44  | 18 | 6   | 99   | 69  |
| 62  | 36   | 50  | 29 | 34  | 39   | 50  |
| 27  | 80   | 23  | 16 | 16  | 15   | 33  |
| 15  | 641  | 6   | 22 | 21  | 572  | 11  |
| 97  | 21   | 12  | 9  | 3   | 144  | 45  |
| 49  | 72   | 56  | 52 | 13  | 89   | 32  |
| 108 | 117  | 17  | 15 | 7   | 189  | 19  |
| 96  | 34   | 56  | 40 | 19  | 78   | 36  |
| 65  | 93   | 29  | 26 | 13  | 148  | 26  |
| 19  | 182  | 25  | 43 | 10  | 347  | 13  |
| 6   | 38   | 62  | 54 | 31  | 45   | 49  |
| 441 | 5    | 32  | 20 | 81  | 50   | 8   |
| 78  | 159  | 17  | 45 | 22  | 117  | 17  |
| 31  | 21   | 19  | 7  | 11  | 30   | 20  |
| 304 | 5    | 35  | 7  | 56  | 45   | 9   |
| 51  | 56   | 39  | 8  | 7   | 89   | 95  |
| 36  | 266  | 9   | 20 | 13  | 451  | 13  |
| 302 | 5    | 43  | 10 | 8   | 12   | 6   |
| 28  | 146  | 19  | 36 | 22  | 338  | 16  |
| 119 | 16   | 47  | 33 | 8   | 27   | 20  |
| 35  | 36   | 51  | 18 | 15  | 64   | 54  |
| 35  | 255  | 9   | 17 | 12  | 423  | 13  |
| 207 | 3    | 23  | 1  | 5   | 6    | 2   |
| 93  | 39   | 47  | 43 | 14  | 112  | 16  |
| 60  | 79   | 18  | 13 | 12  | 138  | 38  |
| 6   | 338  | 2   | 0  | 222 | 2    | 23  |
| 15  | 215  | 11  | 23 | 24  | 217  | 1   |
| 40  | 20   | 20  | 26 | 13  | 31   | 8   |
| 62  | 14   | 46  | 53 | 15  | 38   | 55  |
| 86  | 41   | 15  | 2  | 3   | 98   | 37  |
| 70  | 67   | 63  | 51 | 39  | 100  | 40  |



|     |     |    |    |    |     |    |
|-----|-----|----|----|----|-----|----|
| 1   | 51  | 3  | 1  | 0  | 225 | 3  |
| 41  | 66  | 24 | 14 | 7  | 183 | 40 |
| 31  | 35  | 13 | 24 | 14 | 33  | 10 |
| 88  | 48  | 20 | 8  | 7  | 130 | 10 |
| 14  | 70  | 73 | 13 | 5  | 51  | 88 |
| 42  | 22  | 40 | 10 | 7  | 61  | 9  |
| 22  | 48  | 50 | 22 | 17 | 53  | 35 |
| 76  | 24  | 42 | 9  | 5  | 26  | 20 |
| 19  | 206 | 9  | 15 | 8  | 237 | 6  |
| 134 | 11  | 26 | 3  | 1  | 15  | 16 |
| 23  | 35  | 35 | 14 | 10 | 164 | 77 |
| 44  | 43  | 49 | 17 | 12 | 66  | 40 |
| 27  | 26  | 30 | 15 | 23 | 27  | 11 |
| 54  | 47  | 20 | 9  | 6  | 77  | 49 |
| 21  | 24  | 38 | 18 | 11 | 15  | 16 |
| 40  | 28  | 34 | 17 | 14 | 32  | 35 |
| 46  | 27  | 9  | 0  | 9  | 114 | 1  |
| 48  | 27  | 18 | 13 | 8  | 36  | 38 |
| 54  | 49  | 8  | 9  | 4  | 111 | 8  |
| 32  | 22  | 25 | 28 | 13 | 63  | 21 |
| 43  | 54  | 8  | 3  | 3  | 85  | 23 |
| 22  | 110 | 19 | 14 | 2  | 94  | 16 |
| 3   | 233 | 0  | 0  | 0  | 360 | 1  |
| 18  | 63  | 25 | 8  | 17 | 77  | 28 |
| 11  | 222 | 2  | 22 | 9  | 420 | 69 |
| 40  | 17  | 11 | 7  | 3  | 63  | 39 |
| 15  | 39  | 4  | 5  | 3  | 54  | 5  |
| 26  | 30  | 22 | 8  | 7  | 51  | 17 |
| 111 | 10  | 21 | 13 | 3  | 20  | 2  |
| 42  | 24  | 33 | 14 | 13 | 22  | 17 |
| 29  | 32  | 33 | 28 | 11 | 34  | 27 |
| 29  | 25  | 24 | 7  | 1  | 54  | 44 |
| 30  | 12  | 8  | 6  | 8  | 20  | 20 |
| 31  | 33  | 13 | 7  | 9  | 39  | 9  |
| 29  | 69  | 9  | 18 | 11 | 77  | 1  |
| 37  | 15  | 14 | 9  | 5  | 31  | 16 |
| 2   | 251 | 0  | 3  | 3  | 325 | 2  |
| 20  | 7   | 15 | 8  | 1  | 11  | 23 |
| 22  | 63  | 1  | 3  | 0  | 106 | 9  |
| 16  | 32  | 12 | 4  | 6  | 40  | 38 |
| 15  | 14  | 14 | 4  | 3  | 13  | 16 |
| 4   | 29  | 10 | 11 | 10 | 102 | 11 |
| 23  | 67  | 9  | 13 | 11 | 67  | 2  |
| 22  | 23  | 19 | 5  | 1  | 58  | 20 |
| 132 | 8   | 5  | 7  | 6  | 29  | 6  |
| 16  | 18  | 2  | 1  | 0  | 25  | 3  |
| 2   | 74  | 5  | 10 | 9  | 132 | 0  |
| 19  | 15  | 17 | 22 | 10 | 42  | 10 |
| 19  | 15  | 17 | 22 | 10 | 42  | 10 |
| 73  | 2   | 17 | 3  | 3  | 2   | 3  |
| 27  | 11  | 20 | 14 | 6  | 25  | 30 |
| 29  | 55  | 7  | 14 | 5  | 127 | 31 |
| 86  | 3   | 7  | 7  | 5  | 21  | 3  |
| 15  | 26  | 6  | 14 | 13 | 53  | 12 |
| 8   | 19  | 4  | 8  | 2  | 23  | 12 |
| 32  | 15  | 1  | 6  | 2  | 22  | 4  |
| 29  | 39  | 12 | 7  | 9  | 93  | 24 |
| 10  | 31  | 11 | 2  | 1  | 22  | 9  |
| 4   | 20  | 14 | 7  | 14 | 21  | 4  |

|    |     |    |    |    |     |    |
|----|-----|----|----|----|-----|----|
| 2  | 56  | 8  | 6  | 4  | 69  | 15 |
| 12 | 30  | 22 | 5  | 2  | 32  | 12 |
| 21 | 26  | 5  | 5  | 9  | 25  | 7  |
| 2  | 269 | 1  | 0  | 1  | 342 | 0  |
| 16 | 17  | 11 | 7  | 4  | 24  | 18 |
| 8  | 35  | 14 | 23 | 8  | 58  | 4  |
| 10 | 16  | 25 | 8  | 10 | 12  | 22 |
| 23 | 19  | 5  | 5  | 7  | 28  | 23 |
| 8  | 28  | 13 | 21 | 8  | 53  | 4  |
| 40 | 9   | 13 | 9  | 0  | 9   | 8  |
| 5  | 5   | 13 | 8  | 5  | 3   | 8  |
| 21 | 37  | 1  | 2  | 1  | 50  | 10 |
| 18 | 12  | 13 | 6  | 5  | 19  | 10 |
| 0  | 145 | 0  | 1  | 0  | 212 | 1  |
| 4  | 19  | 16 | 8  | 5  | 10  | 12 |
| 18 | 17  | 9  | 1  | 3  | 22  | 27 |
| 8  | 19  | 10 | 4  | 2  | 20  | 28 |
| 60 | 3   | 12 | 0  | 5  | 9   | 3  |
| 14 | 44  | 7  | 13 | 7  | 64  | 7  |
| 0  | 120 | 3  | 1  | 1  | 167 | 1  |
| 5  | 18  | 4  | 3  | 5  | 15  | 8  |
| 12 | 47  | 2  | 8  | 8  | 67  | 6  |
| 0  | 0   | 0  | 0  | 0  | 0   | 0  |
| 8  | 14  | 11 | 7  | 6  | 20  | 22 |
| 24 | 12  | 13 | 8  | 16 | 16  | 7  |
| 11 | 8   | 11 | 4  | 4  | 16  | 14 |
| 56 | 1   | 15 | 2  | 16 | 10  | 3  |
| 15 | 12  | 14 | 5  | 1  | 16  | 5  |
| 54 | 0   | 11 | 3  | 3  | 6   | 1  |
| 21 | 21  | 11 | 4  | 3  | 17  | 7  |
| 13 | 1   | 13 | 10 | 3  | 3   | 17 |
| 15 | 1   | 12 | 7  | 1  | 3   | 9  |
| 12 | 36  | 2  | 7  | 8  | 49  | 6  |
| 39 | 3   | 7  | 0  | 2  | 5   | 4  |
| 2  | 88  | 0  | 2  | 1  | 183 | 3  |
| 6  | 62  | 8  | 6  | 5  | 100 | 4  |
| 20 | 14  | 8  | 7  | 3  | 33  | 0  |
| 12 | 12  | 7  | 7  | 2  | 6   | 9  |
| 11 | 29  | 0  | 4  | 2  | 36  | 6  |
| 8  | 11  | 11 | 4  | 0  | 4   | 5  |
| 37 | 4   | 6  | 2  | 4  | 3   | 1  |
| 10 | 25  | 1  | 13 | 4  | 29  | 1  |
| 12 | 9   | 3  | 8  | 3  | 17  | 10 |
| 7  | 28  | 7  | 3  | 1  | 23  | 4  |
| 8  | 13  | 3  | 1  | 0  | 8   | 7  |
| 29 | 6   | 7  | 1  | 1  | 8   | 0  |
| 56 | 1   | 8  | 1  | 11 | 18  | 8  |
| 9  | 7   | 13 | 4  | 1  | 1   | 3  |
| 7  | 6   | 11 | 5  | 4  | 10  | 10 |
| 18 | 8   | 6  | 1  | 2  | 15  | 16 |
| 6  | 15  | 3  | 7  | 2  | 19  | 1  |
| 3  | 10  | 7  | 0  | 1  | 24  | 15 |
| 13 | 8   | 2  | 5  | 3  | 5   | 5  |
| 15 | 3   | 5  | 2  | 2  | 6   | 4  |
| 7  | 3   | 15 | 3  | 1  | 4   | 11 |
| 11 | 10  | 0  | 4  | 4  | 18  | 2  |
| 16 | 5   | 7  | 3  | 3  | 19  | 12 |
| 0  | 24  | 0  | 2  | 1  | 54  | 0  |
| 0  | 41  | 0  | 4  | 4  | 54  | 0  |

|    |     |    |    |   |    |    |
|----|-----|----|----|---|----|----|
| 9  | 20  | 4  | 2  | 2 | 50 | 9  |
| 6  | 10  | 7  | 2  | 3 | 25 | 3  |
| 17 | 6   | 7  | 2  | 0 | 6  | 6  |
| 7  | 7   | 15 | 8  | 2 | 8  | 1  |
| 2  | 14  | 7  | 0  | 1 | 2  | 10 |
| 9  | 7   | 6  | 10 | 7 | 16 | 11 |
| 3  | 1   | 1  | 3  | 1 | 2  | 6  |
| 8  | 24  | 0  | 2  | 3 | 17 | 0  |
| 7  | 5   | 4  | 6  | 0 | 7  | 5  |
| 29 | 4   | 8  | 1  | 0 | 3  | 3  |
| 14 | 1   | 5  | 2  | 6 | 7  | 2  |
| 34 | 2   | 4  | 0  | 1 | 4  | 1  |
| 7  | 0   | 8  | 2  | 0 | 3  | 3  |
| 7  | 7   | 2  | 2  | 0 | 10 | 2  |
| 22 | 9   | 4  | 3  | 2 | 15 | 2  |
| 7  | 4   | 5  | 0  | 2 | 6  | 7  |
| 6  | 8   | 5  | 4  | 4 | 4  | 4  |
| 6  | 5   | 4  | 6  | 3 | 4  | 4  |
| 0  | 101 | 1  | 2  | 1 | 63 | 0  |
| 13 | 4   | 9  | 9  | 5 | 7  | 6  |
| 4  | 25  | 5  | 5  | 2 | 31 | 2  |
| 18 | 9   | 7  | 7  | 0 | 18 | 6  |
| 8  | 3   | 1  | 2  | 1 | 1  | 3  |
| 8  | 4   | 7  | 0  | 1 | 5  | 5  |
| 16 | 27  | 1  | 1  | 0 | 46 | 27 |
| 3  | 4   | 1  | 4  | 0 | 23 | 6  |
| 8  | 2   | 0  | 0  | 0 | 6  | 1  |
| 11 | 3   | 0  | 0  | 0 | 0  | 1  |
| 6  | 2   | 0  | 1  | 1 | 3  | 1  |
| 8  | 3   | 9  | 6  | 1 | 7  | 2  |
| 3  | 2   | 7  | 1  | 0 | 7  | 11 |
| 4  | 6   | 4  | 3  | 0 | 4  | 6  |
| 8  | 3   | 2  | 0  | 1 | 12 | 5  |
| 8  | 20  | 2  | 1  | 3 | 51 | 0  |
| 7  | 6   | 0  | 0  | 3 | 21 | 2  |
| 7  | 7   | 2  | 1  | 2 | 6  | 2  |
| 4  | 2   | 5  | 2  | 0 | 3  | 4  |
| 7  | 12  | 3  | 1  | 0 | 10 | 5  |
| 10 | 7   | 0  | 2  | 0 | 2  | 2  |
| 1  | 39  | 1  | 3  | 2 | 53 | 0  |
| 2  | 30  | 4  | 0  | 2 | 3  | 7  |
| 3  | 7   | 0  | 1  | 0 | 9  | 0  |
| 1  | 23  | 3  | 3  | 1 | 9  | 6  |
| 5  | 3   | 8  | 4  | 3 | 3  | 4  |
| 0  | 20  | 2  | 2  | 1 | 17 | 0  |
| 2  | 6   | 1  | 2  | 0 | 12 | 3  |
| 0  | 6   | 3  | 0  | 3 | 6  | 1  |
| 2  | 10  | 4  | 2  | 0 | 8  | 5  |
| 3  | 17  | 4  | 11 | 0 | 4  | 2  |
| 5  | 3   | 2  | 0  | 0 | 8  | 6  |
| 11 | 3   | 3  | 1  | 0 | 9  | 2  |
| 14 | 5   | 3  | 2  | 1 | 3  | 3  |
| 2  | 17  | 0  | 0  | 1 | 26 | 1  |
| 1  | 32  | 0  | 2  | 1 | 31 | 2  |
| 4  | 2   | 6  | 0  | 0 | 3  | 8  |
| 1  | 2   | 7  | 1  | 1 | 6  | 4  |
| 9  | 5   | 4  | 1  | 2 | 8  | 28 |
| 5  | 2   | 0  | 2  | 0 | 3  | 4  |
| 3  | 14  | 0  | 0  | 0 | 11 | 0  |

|    |    |   |   |   |    |   |
|----|----|---|---|---|----|---|
| 13 | 3  | 2 | 1 | 0 | 0  | 1 |
| 1  | 27 | 0 | 0 | 1 | 41 | 0 |
| 15 | 1  | 7 | 1 | 3 | 3  | 2 |
| 3  | 1  | 5 | 3 | 0 | 7  | 1 |
| 6  | 5  | 1 | 0 | 1 | 5  | 4 |
| 5  | 3  | 3 | 1 | 3 | 3  | 4 |
| 5  | 0  | 1 | 0 | 2 | 5  | 8 |
| 2  | 2  | 0 | 1 | 1 | 7  | 3 |
| 7  | 14 | 1 | 3 | 1 | 7  | 0 |
| 13 | 1  | 2 | 0 | 0 | 5  | 1 |
| 2  | 1  | 5 | 3 | 2 | 7  | 2 |
| 7  | 5  | 3 | 0 | 0 | 3  | 6 |
| 1  | 1  | 5 | 2 | 0 | 1  | 0 |
| 6  | 7  | 1 | 2 | 0 | 8  | 3 |
| 4  | 4  | 4 | 1 | 1 | 2  | 5 |
| 1  | 9  | 4 | 6 | 1 | 13 | 1 |
| 3  | 9  | 0 | 0 | 0 | 4  | 0 |
| 1  | 3  | 4 | 1 | 1 | 4  | 4 |
| 23 | 0  | 2 | 1 | 0 | 8  | 2 |
| 2  | 10 | 0 | 0 | 2 | 16 | 0 |
| 2  | 0  | 1 | 0 | 4 | 0  | 1 |
| 2  | 1  | 1 | 0 | 1 | 3  | 2 |
| 1  | 33 | 0 | 0 | 2 | 16 | 0 |
| 3  | 2  | 3 | 1 | 0 | 7  | 2 |
| 3  | 5  | 1 | 0 | 2 | 1  | 1 |
| 0  | 1  | 7 | 0 | 3 | 11 | 1 |
| 5  | 7  | 5 | 2 | 1 | 18 | 1 |
| 3  | 1  | 0 | 0 | 0 | 1  | 3 |
| 0  | 6  | 2 | 0 | 1 | 6  | 0 |
| 0  | 69 | 1 | 0 | 0 | 9  | 0 |
| 3  | 6  | 5 | 1 | 2 | 6  | 4 |
| 4  | 0  | 1 | 1 | 0 | 4  | 6 |
| 4  | 0  | 0 | 0 | 0 | 0  | 0 |
| 3  | 10 | 0 | 3 | 0 | 10 | 3 |
| 3  | 2  | 3 | 3 | 0 | 8  | 1 |
| 0  | 3  | 1 | 0 | 0 | 5  | 0 |
| 1  | 11 | 0 | 3 | 0 | 13 | 0 |
| 1  | 33 | 1 | 1 | 0 | 58 | 1 |
| 0  | 33 | 0 | 0 | 0 | 43 | 0 |
| 2  | 7  | 1 | 0 | 0 | 6  | 1 |
| 2  | 1  | 2 | 0 | 0 | 1  | 2 |
| 2  | 2  | 1 | 2 | 1 | 7  | 0 |
| 3  | 2  | 2 | 0 | 0 | 1  | 2 |
| 6  | 3  | 3 | 5 | 5 | 6  | 3 |
| 1  | 32 | 0 | 0 | 0 | 40 | 0 |
| 11 | 3  | 1 | 0 | 1 | 7  | 1 |
| 11 | 1  | 2 | 1 | 2 | 9  | 0 |
| 0  | 8  | 0 | 1 | 0 | 2  | 1 |
| 4  | 2  | 3 | 3 | 0 | 1  | 0 |
| 0  | 2  | 1 | 2 | 1 | 2  | 0 |
| 6  | 5  | 2 | 0 | 0 | 4  | 5 |
| 0  | 24 | 0 | 0 | 0 | 24 | 0 |
| 0  | 4  | 0 | 0 | 0 | 2  | 0 |
| 5  | 3  | 1 | 2 | 1 | 10 | 1 |
| 1  | 2  | 3 | 0 | 2 | 8  | 3 |
| 2  | 4  | 0 | 1 | 0 | 6  | 1 |
| 0  | 14 | 1 | 1 | 1 | 19 | 0 |
| 3  | 2  | 2 | 0 | 1 | 4  | 0 |
| 2  | 2  | 1 | 1 | 0 | 2  | 1 |

|    |    |   |   |   |    |   |
|----|----|---|---|---|----|---|
| 2  | 2  | 3 | 0 | 0 | 1  | 2 |
| 0  | 6  | 8 | 1 | 1 | 4  | 1 |
| 3  | 4  | 3 | 1 | 0 | 4  | 2 |
| 1  | 8  | 1 | 1 | 0 | 4  | 4 |
| 7  | 3  | 0 | 1 | 0 | 8  | 1 |
| 0  | 1  | 1 | 1 | 0 | 2  | 0 |
| 8  | 0  | 3 | 0 | 3 | 0  | 0 |
| 4  | 4  | 1 | 1 | 0 | 12 | 0 |
| 5  | 8  | 1 | 1 | 1 | 2  | 0 |
| 0  | 1  | 3 | 1 | 2 | 1  | 1 |
| 4  | 2  | 2 | 0 | 0 | 3  | 0 |
| 1  | 2  | 3 | 1 | 1 | 5  | 0 |
| 14 | 1  | 0 | 0 | 2 | 14 | 0 |
| 3  | 12 | 0 | 1 | 0 | 22 | 0 |
| 0  | 2  | 0 | 0 | 0 | 2  | 0 |
| 1  | 3  | 1 | 4 | 0 | 4  | 1 |
| 4  | 3  | 3 | 1 | 1 | 1  | 1 |
| 3  | 2  | 3 | 0 | 1 | 2  | 1 |
| 2  | 15 | 1 | 0 | 0 | 16 | 1 |
| 2  | 0  | 7 | 1 | 0 | 5  | 1 |
| 1  | 2  | 2 | 0 | 2 | 3  | 1 |
| 0  | 2  | 1 | 1 | 1 | 4  | 1 |
| 2  | 3  | 1 | 1 | 2 | 9  | 2 |
| 0  | 1  | 1 | 0 | 1 | 5  | 2 |
| 2  | 0  | 4 | 0 | 0 | 2  | 1 |
| 1  | 0  | 1 | 0 | 1 | 1  | 1 |
| 3  | 3  | 1 | 1 | 0 | 1  | 1 |
| 0  | 5  | 2 | 1 | 0 | 2  | 0 |
| 4  | 1  | 2 | 1 | 0 | 3  | 0 |
| 4  | 0  | 1 | 0 | 0 | 2  | 3 |
| 2  | 2  | 0 | 1 | 0 | 8  | 2 |
| 0  | 15 | 0 | 1 | 0 | 18 | 1 |
| 1  | 3  | 1 | 0 | 0 | 2  | 1 |
| 3  | 6  | 1 | 0 | 0 | 11 | 0 |
| 0  | 2  | 2 | 0 | 1 | 4  | 1 |
| 4  | 0  | 1 | 1 | 0 | 6  | 1 |
| 0  | 1  | 0 | 0 | 0 | 1  | 0 |
| 1  | 2  | 0 | 0 | 0 | 5  | 2 |
| 1  | 18 | 0 | 1 | 2 | 14 | 0 |
| 1  | 5  | 1 | 0 | 0 | 6  | 2 |
| 1  | 6  | 1 | 1 | 0 | 9  | 3 |
| 3  | 1  | 1 | 1 | 0 | 4  | 1 |
| 1  | 0  | 2 | 2 | 0 | 1  | 3 |
| 11 | 1  | 0 | 0 | 0 | 19 | 3 |
| 0  | 4  | 0 | 0 | 0 | 14 | 0 |
| 2  | 0  | 7 | 0 | 2 | 2  | 2 |
| 0  | 5  | 1 | 0 | 0 | 8  | 0 |
| 0  | 11 | 0 | 0 | 0 | 17 | 0 |
| 1  | 6  | 0 | 1 | 0 | 10 | 0 |
| 1  | 0  | 1 | 0 | 1 | 0  | 1 |
| 2  | 0  | 1 | 2 | 0 | 0  | 0 |
| 0  | 0  | 3 | 3 | 1 | 3  | 0 |
| 1  | 0  | 2 | 1 | 0 | 0  | 0 |
| 0  | 0  | 2 | 1 | 0 | 0  | 1 |
| 0  | 16 | 0 | 0 | 0 | 12 | 0 |
| 1  | 5  | 0 | 0 | 0 | 18 | 1 |
| 5  | 2  | 0 | 1 | 5 | 11 | 0 |
| 1  | 1  | 4 | 0 | 1 | 2  | 2 |
| 1  | 2  | 1 | 1 | 1 | 4  | 2 |

|   |    |   |   |   |    |   |
|---|----|---|---|---|----|---|
| 0 | 0  | 1 | 0 | 0 | 2  | 1 |
| 0 | 1  | 0 | 2 | 1 | 1  | 1 |
| 1 | 0  | 3 | 0 | 1 | 3  | 0 |
| 0 | 2  | 3 | 0 | 1 | 1  | 2 |
| 0 | 3  | 1 | 0 | 0 | 3  | 1 |
| 5 | 1  | 0 | 1 | 0 | 2  | 1 |
| 2 | 2  | 1 | 2 | 0 | 0  | 1 |
| 1 | 4  | 0 | 0 | 0 | 7  | 0 |
| 1 | 2  | 1 | 2 | 0 | 0  | 0 |
| 2 | 0  | 2 | 1 | 0 | 1  | 0 |
| 0 | 1  | 1 | 0 | 0 | 2  | 4 |
| 0 | 1  | 2 | 0 | 0 | 4  | 1 |
| 2 | 1  | 1 | 0 | 2 | 4  | 2 |
| 1 | 3  | 3 | 0 | 1 | 2  | 1 |
| 5 | 1  | 0 | 0 | 0 | 1  | 0 |
| 1 | 2  | 3 | 1 | 0 | 1  | 0 |
| 1 | 2  | 0 | 1 | 0 | 2  | 1 |
| 1 | 1  | 0 | 1 | 1 | 0  | 0 |
| 1 | 5  | 0 | 1 | 0 | 10 | 0 |
| 3 | 3  | 0 | 0 | 0 | 6  | 1 |
| 1 | 2  | 1 | 0 | 0 | 2  | 0 |
| 3 | 0  | 0 | 1 | 0 | 5  | 2 |
| 2 | 2  | 1 | 1 | 0 | 2  | 2 |
| 5 | 2  | 0 | 0 | 0 | 1  | 2 |
| 0 | 1  | 1 | 0 | 0 | 0  | 1 |
| 1 | 4  | 0 | 0 | 0 | 1  | 0 |
| 1 | 1  | 0 | 1 | 1 | 2  | 0 |
| 0 | 1  | 1 | 1 | 0 | 0  | 1 |
| 1 | 2  | 1 | 0 | 0 | 4  | 0 |
| 1 | 2  | 0 | 0 | 0 | 3  | 1 |
| 2 | 1  | 1 | 0 | 0 | 3  | 0 |
| 2 | 12 | 2 | 4 | 1 | 6  | 1 |
| 2 | 1  | 0 | 1 | 0 | 1  | 0 |
| 0 | 0  | 0 | 0 | 0 | 3  | 1 |
| 3 | 1  | 0 | 0 | 0 | 2  | 0 |
| 1 | 0  | 0 | 1 | 0 | 0  | 4 |
| 0 | 0  | 0 | 1 | 3 | 1  | 0 |
| 4 | 0  | 0 | 0 | 0 | 2  | 2 |

|      |      |      |      |      |      |      |
|------|------|------|------|------|------|------|
| 0.95 | 0.06 | 0.63 | 0.98 | 0.62 | 0.98 | 0.76 |
| 3    | 33   | 16   | 1    | 17   | 2    | 14   |
| 1    | 1    | 1    | 1    | 1    | 1    | 1    |

|         |         |        |        |        |         |         |
|---------|---------|--------|--------|--------|---------|---------|
| 57      | 58      | 59     | 60     | 61     | 62      | 63      |
| 30      | 31      | 32     | 33     | 34     | 35      | 36      |
| F_39    | G_3     | G_30   | G_31   | G_32   | G_4     | G_5     |
| CHR_NP  | CHR_NP  | CHR_NP | CHR_NP | CHR_NP | CHR_NP  | CHR_NP  |
| 1856730 | 2304707 | 924323 | 555209 | 358914 | 3926455 | 1257195 |
| CHR_NP  | CHR_NP  | CHR_NP | CHR_NP | CHR_NP | CHR_NP  | CHR_NP  |
| 806882  | 330186  | 233445 | 60054  | 27156  | 715360  | 584807  |
| 135146  | 80730   | 89825  | 81885  | 50732  | 166580  | 98444   |
| 110065  | 70536   | 115590 | 43191  | 49624  | 78461   | 70682   |
| 125806  | 117238  | 76499  | 63556  | 41067  | 197923  | 106696  |
| 81711   | 112000  | 127053 | 57366  | 33951  | 151060  | 106970  |

|       |        |       |       |       |        |       |
|-------|--------|-------|-------|-------|--------|-------|
| 74839 | 337970 | 10312 | 24074 | 19272 | 669358 | 14568 |
| 63278 | 146448 | 43235 | 48602 | 33276 | 252380 | 37877 |
| 3826  | 255607 | 1558  | 3955  | 3195  | 304888 | 3580  |
| 46674 | 132537 | 13936 | 10556 | 3738  | 214919 | 10351 |
| 38110 | 54366  | 18696 | 10050 | 4479  | 125897 | 19095 |
| 41760 | 36692  | 9162  | 8857  | 2892  | 58207  | 8865  |
| 29721 | 24843  | 16347 | 12921 | 6828  | 42738  | 20501 |
| 28155 | 59508  | 17309 | 14640 | 9224  | 80893  | 8750  |
| 20767 | 17432  | 13921 | 7451  | 4023  | 33867  | 26210 |
| 10166 | 52787  | 2598  | 6652  | 3420  | 83123  | 1659  |
| 15521 | 4803   | 4535  | 1400  | 588   | 7967   | 7460  |
| 6990  | 46001  | 2812  | 6284  | 4297  | 65216  | 2153  |
| 11550 | 10033  | 3807  | 4796  | 2853  | 18322  | 2596  |
| 8434  | 36055  | 5974  | 5219  | 3205  | 69159  | 4040  |
| 8110  | 10606  | 9427  | 5029  | 2619  | 17863  | 4956  |
| 6725  | 6812   | 4791  | 2626  | 1310  | 9992   | 3862  |
| 7740  | 10373  | 4887  | 2776  | 1160  | 22460  | 5937  |
| 8362  | 9213   | 3233  | 1742  | 613   | 21293  | 3969  |
| 2613  | 14634  | 5704  | 5429  | 4673  | 17203  | 3609  |
| 2730  | 21942  | 3822  | 2457  | 2791  | 25787  | 1081  |
| 8563  | 5931   | 2074  | 704   | 418   | 7579   | 3527  |
| 8258  | 5835   | 7276  | 3489  | 2027  | 9094   | 7577  |
| 4240  | 17088  | 905   | 1307  | 1126  | 41338  | 2796  |
| 8869  | 5601   | 1955  | 2292  | 1628  | 13657  | 2219  |
| 9835  | 4533   | 4091  | 2173  | 827   | 8205   | 4514  |
| 5727  | 7641   | 2978  | 4003  | 2313  | 11523  | 2645  |
| 4902  | 7556   | 4750  | 2719  | 1774  | 11574  | 6496  |
| 2358  | 24953  | 888   | 1704  | 969   | 38405  | 1508  |
| 1062  | 29276  | 428   | 1210  | 558   | 25718  | 253   |
| 8196  | 4940   | 1840  | 2158  | 1509  | 12423  | 2036  |
| 5392  | 3475   | 3209  | 2703  | 3005  | 9914   | 6992  |
| 4191  | 4920   | 1965  | 2524  | 1494  | 11445  | 1205  |
| 4112  | 6314   | 1628  | 1408  | 2015  | 6517   | 1049  |
| 2147  | 1471   | 3720  | 2049  | 920   | 4721   | 4100  |
| 1231  | 3845   | 4246  | 974   | 466   | 7388   | 6950  |
| 1878  | 754    | 2685  | 1538  | 1136  | 1409   | 1880  |
| 2415  | 4776   | 3557  | 2218  | 1235  | 3723   | 2467  |
| 3437  | 1907   | 1814  | 1232  | 915   | 3808   | 2879  |
| 602   | 12193  | 165   | 563   | 382   | 30204  | 243   |
| 1550  | 2408   | 1799  | 868   | 896   | 2494   | 1098  |
| 3330  | 2052   | 1851  | 1477  | 605   | 2644   | 1214  |
| 3312  | 4089   | 912   | 1093  | 458   | 5914   | 1492  |
| 2395  | 1343   | 2003  | 842   | 276   | 3222   | 2347  |
| 417   | 14936  | 82    | 187   | 88    | 21157  | 350   |
| 468   | 4329   | 205   | 184   | 51    | 8480   | 243   |
| 6902  | 192    | 1441  | 228   | 186   | 444    | 406   |
| 1175  | 1566   | 789   | 1067  | 777   | 1933   | 385   |
| 2076  | 1458   | 1106  | 856   | 476   | 1923   | 1624  |
| 1007  | 1047   | 484   | 310   | 95    | 2091   | 325   |
| 1036  | 3036   | 98    | 18    | 4     | 4507   | 859   |
| 182   | 15017  | 37    | 55    | 19    | 17962  | 108   |
| 1500  | 1967   | 888   | 872   | 667   | 3703   | 1109  |
| 576   | 2395   | 874   | 791   | 386   | 2376   | 683   |
| 1803  | 2163   | 1338  | 1052  | 576   | 1430   | 869   |
| 2782  | 756    | 1465  | 1276  | 911   | 1024   | 1720  |
| 1315  | 841    | 728   | 977   | 534   | 1021   | 605   |
| 548   | 1838   | 569   | 399   | 172   | 1929   | 663   |
| 361   | 10590  | 42    | 94    | 50    | 14472  | 107   |
| 68    | 7637   | 30    | 39    | 55    | 9973   | 52    |

|      |      |     |     |     |      |      |
|------|------|-----|-----|-----|------|------|
| 2237 | 529  | 501 | 368 | 143 | 1498 | 1372 |
| 711  | 2897 | 425 | 447 | 361 | 5759 | 343  |
| 642  | 3817 | 206 | 352 | 185 | 4518 | 217  |
| 352  | 5979 | 146 | 249 | 220 | 7899 | 207  |
| 431  | 1258 | 273 | 255 | 301 | 731  | 172  |
| 1460 | 822  | 128 | 98  | 77  | 2021 | 730  |
| 934  | 276  | 482 | 474 | 288 | 343  | 551  |
| 1169 | 301  | 413 | 130 | 80  | 483  | 436  |
| 330  | 3638 | 101 | 223 | 122 | 5449 | 73   |
| 875  | 1171 | 252 | 108 | 47  | 2458 | 498  |
| 654  | 1941 | 485 | 669 | 604 | 2152 | 311  |
| 3828 | 158  | 929 | 143 | 469 | 1176 | 209  |
| 674  | 826  | 218 | 36  | 21  | 1775 | 853  |
| 1943 | 744  | 374 | 213 | 217 | 1197 | 1260 |
| 594  | 510  | 643 | 428 | 234 | 653  | 605  |
| 636  | 333  | 244 | 341 | 219 | 299  | 147  |
| 683  | 901  | 175 | 216 | 144 | 1996 | 315  |
| 535  | 321  | 329 | 55  | 20  | 436  | 401  |
| 579  | 162  | 352 | 283 | 141 | 790  | 627  |
| 261  | 1138 | 52  | 197 | 37  | 1224 | 50   |
| 339  | 1474 | 121 | 238 | 113 | 1906 | 299  |
| 278  | 359  | 223 | 80  | 50  | 339  | 258  |
| 750  | 243  | 411 | 253 | 151 | 470  | 427  |
| 269  | 2775 | 93  | 191 | 152 | 3382 | 92   |
| 558  | 533  | 309 | 323 | 199 | 855  | 176  |
| 764  | 421  | 581 | 292 | 173 | 403  | 334  |
| 472  | 413  | 257 | 128 | 66  | 613  | 346  |
| 22   | 3259 | 5   | 7   | 7   | 5354 | 54   |
| 189  | 359  | 249 | 68  | 37  | 351  | 200  |
| 476  | 810  | 123 | 135 | 87  | 1133 | 106  |
| 145  | 1231 | 12  | 36  | 29  | 2426 | 37   |
| 235  | 580  | 112 | 190 | 154 | 674  | 44   |
| 395  | 143  | 294 | 220 | 93  | 200  | 187  |
| 342  | 168  | 221 | 157 | 50  | 353  | 290  |
| 321  | 200  | 569 | 221 | 162 | 244  | 250  |
| 176  | 1834 | 26  | 84  | 47  | 3797 | 30   |
| 143  | 156  | 132 | 69  | 67  | 250  | 153  |
| 261  | 414  | 215 | 171 | 62  | 833  | 205  |
| 352  | 326  | 422 | 220 | 153 | 318  | 212  |
| 286  | 1161 | 160 | 142 | 169 | 1119 | 143  |
| 297  | 721  | 38  | 103 | 39  | 1575 | 41   |
| 92   | 1600 | 45  | 57  | 37  | 2189 | 69   |
| 260  | 212  | 140 | 137 | 80  | 153  | 106  |
| 298  | 248  | 223 | 208 | 190 | 385  | 142  |
| 205  | 1242 | 39  | 112 | 77  | 1598 | 66   |
| 136  | 1682 | 111 | 99  | 81  | 2438 | 85   |
| 122  | 556  | 176 | 141 | 75  | 574  | 33   |
| 233  | 223  | 224 | 90  | 68  | 236  | 132  |
| 112  | 114  | 258 | 131 | 94  | 236  | 268  |
| 132  | 821  | 55  | 65  | 43  | 2178 | 73   |
| 225  | 417  | 293 | 127 | 75  | 450  | 106  |
| 337  | 147  | 246 | 142 | 64  | 222  | 95   |
| 125  | 683  | 58  | 50  | 18  | 351  | 51   |
| 264  | 531  | 65  | 153 | 105 | 633  | 39   |
| 264  | 531  | 65  | 153 | 105 | 633  | 39   |
| 97   | 228  | 101 | 107 | 120 | 125  | 81   |
| 229  | 152  | 72  | 37  | 10  | 173  | 170  |
| 202  | 58   | 60  | 23  | 16  | 44   | 70   |
| 384  | 101  | 86  | 10  | 19  | 742  | 17   |



|     |      |     |     |    |      |     |
|-----|------|-----|-----|----|------|-----|
| 135 | 99   | 50  | 50  | 22 | 270  | 55  |
| 23  | 2202 | 7   | 11  | 6  | 2055 | 17  |
| 207 | 101  | 87  | 111 | 54 | 162  | 87  |
| 175 | 140  | 108 | 58  | 51 | 174  | 118 |
| 204 | 101  | 77  | 35  | 12 | 116  | 49  |
| 80  | 29   | 63  | 29  | 13 | 38   | 61  |
| 150 | 104  | 236 | 134 | 68 | 65   | 72  |
| 184 | 272  | 14  | 2   | 0  | 753  | 547 |
| 122 | 132  | 82  | 101 | 49 | 165  | 79  |
| 160 | 211  | 73  | 74  | 29 | 336  | 48  |
| 111 | 33   | 45  | 32  | 27 | 79   | 73  |
| 74  | 500  | 23  | 19  | 6  | 555  | 36  |
| 126 | 173  | 71  | 53  | 26 | 152  | 46  |
| 106 | 166  | 71  | 11  | 3  | 320  | 62  |
| 129 | 159  | 35  | 18  | 14 | 257  | 60  |
| 129 | 165  | 22  | 35  | 31 | 392  | 47  |
| 77  | 93   | 93  | 26  | 40 | 76   | 86  |
| 77  | 109  | 36  | 13  | 9  | 161  | 94  |
| 158 | 52   | 38  | 32  | 23 | 129  | 69  |
| 32  | 87   | 94  | 32  | 24 | 108  | 96  |
| 79  | 132  | 65  | 82  | 56 | 223  | 69  |
| 19  | 1255 | 3   | 14  | 7  | 1503 | 8   |
| 120 | 55   | 47  | 22  | 19 | 225  | 103 |
| 55  | 39   | 85  | 51  | 27 | 46   | 66  |
| 83  | 104  | 79  | 79  | 46 | 239  | 42  |
| 180 | 68   | 45  | 41  | 31 | 260  | 128 |
| 70  | 87   | 78  | 32  | 45 | 118  | 116 |
| 55  | 266  | 43  | 26  | 28 | 337  | 26  |
| 55  | 286  | 33  | 24  | 25 | 619  | 36  |
| 150 | 48   | 17  | 2   | 4  | 138  | 5   |
| 50  | 46   | 103 | 50  | 18 | 105  | 94  |
| 14  | 208  | 119 | 35  | 4  | 186  | 44  |
| 142 | 63   | 34  | 24  | 30 | 79   | 84  |
| 40  | 100  | 65  | 53  | 36 | 152  | 71  |
| 99  | 16   | 38  | 17  | 41 | 39   | 41  |
| 86  | 74   | 47  | 22  | 18 | 62   | 33  |
| 116 | 67   | 21  | 4   | 2  | 119  | 110 |
| 6   | 701  | 4   | 13  | 9  | 1268 | 1   |
| 28  | 53   | 50  | 43  | 31 | 65   | 57  |
| 83  | 41   | 48  | 33  | 42 | 83   | 70  |
| 30  | 248  | 24  | 15  | 10 | 300  | 19  |
| 22  | 168  | 45  | 33  | 36 | 193  | 18  |
| 101 | 48   | 44  | 18  | 6  | 99   | 69  |
| 62  | 36   | 50  | 29  | 34 | 39   | 50  |
| 27  | 80   | 23  | 16  | 16 | 15   | 33  |
| 15  | 641  | 6   | 22  | 21 | 572  | 11  |
| 97  | 21   | 12  | 9   | 3  | 144  | 45  |
| 49  | 72   | 56  | 52  | 13 | 89   | 32  |
| 108 | 117  | 17  | 15  | 7  | 189  | 19  |
| 96  | 34   | 56  | 40  | 19 | 78   | 36  |
| 65  | 93   | 29  | 26  | 13 | 148  | 26  |
| 19  | 182  | 25  | 43  | 10 | 347  | 13  |
| 6   | 38   | 62  | 54  | 31 | 45   | 49  |
| 441 | 5    | 32  | 20  | 81 | 50   | 8   |
| 78  | 159  | 17  | 45  | 22 | 117  | 17  |
| 31  | 21   | 19  | 7   | 11 | 30   | 20  |
| 304 | 5    | 35  | 7   | 56 | 45   | 9   |
| 51  | 56   | 39  | 8   | 7  | 89   | 95  |
| 36  | 266  | 9   | 20  | 13 | 451  | 13  |

|     |     |    |    |     |     |    |
|-----|-----|----|----|-----|-----|----|
| 302 | 5   | 43 | 10 | 8   | 12  | 6  |
| 28  | 146 | 19 | 36 | 22  | 338 | 16 |
| 119 | 16  | 47 | 33 | 8   | 27  | 20 |
| 35  | 36  | 51 | 18 | 15  | 64  | 54 |
| 35  | 255 | 9  | 17 | 12  | 423 | 13 |
| 207 | 3   | 23 | 1  | 5   | 6   | 2  |
| 93  | 39  | 47 | 43 | 14  | 112 | 16 |
| 60  | 79  | 18 | 13 | 12  | 138 | 38 |
| 6   | 338 | 2  | 0  | 222 | 2   | 23 |
| 15  | 215 | 11 | 23 | 24  | 217 | 1  |
| 40  | 20  | 20 | 26 | 13  | 31  | 8  |
| 62  | 14  | 46 | 53 | 15  | 38  | 55 |
| 86  | 41  | 15 | 2  | 3   | 98  | 37 |
| 70  | 67  | 63 | 51 | 39  | 100 | 40 |
| 1   | 51  | 3  | 1  | 0   | 225 | 3  |
| 41  | 66  | 24 | 14 | 7   | 183 | 40 |
| 31  | 35  | 13 | 24 | 14  | 33  | 10 |
| 88  | 48  | 20 | 8  | 7   | 130 | 10 |
| 14  | 70  | 73 | 13 | 5   | 51  | 88 |
| 42  | 22  | 40 | 10 | 7   | 61  | 9  |
| 22  | 48  | 50 | 22 | 17  | 53  | 35 |
| 76  | 24  | 42 | 9  | 5   | 26  | 20 |
| 19  | 206 | 9  | 15 | 8   | 237 | 6  |
| 134 | 11  | 26 | 3  | 1   | 15  | 16 |
| 23  | 35  | 35 | 14 | 10  | 164 | 77 |
| 44  | 43  | 49 | 17 | 12  | 66  | 40 |
| 27  | 26  | 30 | 15 | 23  | 27  | 11 |
| 54  | 47  | 20 | 9  | 6   | 77  | 49 |
| 21  | 24  | 38 | 18 | 11  | 15  | 16 |
| 40  | 28  | 34 | 17 | 14  | 32  | 35 |
| 46  | 27  | 9  | 0  | 9   | 114 | 1  |
| 48  | 27  | 18 | 13 | 8   | 36  | 38 |
| 54  | 49  | 8  | 9  | 4   | 111 | 8  |
| 32  | 22  | 25 | 28 | 13  | 63  | 21 |
| 43  | 54  | 8  | 3  | 3   | 85  | 23 |
| 22  | 110 | 19 | 14 | 2   | 94  | 16 |
| 3   | 233 | 0  | 0  | 0   | 360 | 1  |
| 18  | 63  | 25 | 8  | 17  | 77  | 28 |
| 11  | 222 | 2  | 22 | 9   | 420 | 69 |
| 40  | 17  | 11 | 7  | 3   | 63  | 39 |
| 15  | 39  | 4  | 5  | 3   | 54  | 5  |
| 26  | 30  | 22 | 8  | 7   | 51  | 17 |
| 111 | 10  | 21 | 13 | 3   | 20  | 2  |
| 42  | 24  | 33 | 14 | 13  | 22  | 17 |
| 29  | 32  | 33 | 28 | 11  | 34  | 27 |
| 29  | 25  | 24 | 7  | 1   | 54  | 44 |
| 30  | 12  | 8  | 6  | 8   | 20  | 20 |
| 31  | 33  | 13 | 7  | 9   | 39  | 9  |
| 29  | 69  | 9  | 18 | 11  | 77  | 1  |
| 37  | 15  | 14 | 9  | 5   | 31  | 16 |
| 2   | 251 | 0  | 3  | 3   | 325 | 2  |
| 20  | 7   | 15 | 8  | 1   | 11  | 23 |
| 22  | 63  | 1  | 3  | 0   | 106 | 9  |
| 16  | 32  | 12 | 4  | 6   | 40  | 38 |
| 15  | 14  | 14 | 4  | 3   | 13  | 16 |
| 4   | 29  | 10 | 11 | 10  | 102 | 11 |
| 23  | 67  | 9  | 13 | 11  | 67  | 2  |
| 22  | 23  | 19 | 5  | 1   | 58  | 20 |
| 132 | 8   | 5  | 7  | 6   | 29  | 6  |

|    |     |    |    |    |     |    |
|----|-----|----|----|----|-----|----|
| 16 | 18  | 2  | 1  | 0  | 25  | 3  |
| 2  | 74  | 5  | 10 | 9  | 132 | 0  |
| 19 | 15  | 17 | 22 | 10 | 42  | 10 |
| 19 | 15  | 17 | 22 | 10 | 42  | 10 |
| 73 | 2   | 17 | 3  | 3  | 2   | 3  |
| 27 | 11  | 20 | 14 | 6  | 25  | 30 |
| 29 | 55  | 7  | 14 | 5  | 127 | 31 |
| 86 | 3   | 7  | 7  | 5  | 21  | 3  |
| 15 | 26  | 6  | 14 | 13 | 53  | 12 |
| 8  | 19  | 4  | 8  | 2  | 23  | 12 |
| 32 | 15  | 1  | 6  | 2  | 22  | 4  |
| 29 | 39  | 12 | 7  | 9  | 93  | 24 |
| 10 | 31  | 11 | 2  | 1  | 22  | 9  |
| 4  | 20  | 14 | 7  | 14 | 21  | 4  |
| 2  | 56  | 8  | 6  | 4  | 69  | 15 |
| 12 | 30  | 22 | 5  | 2  | 32  | 12 |
| 21 | 26  | 5  | 5  | 9  | 25  | 7  |
| 2  | 269 | 1  | 0  | 1  | 342 | 0  |
| 16 | 17  | 11 | 7  | 4  | 24  | 18 |
| 8  | 35  | 14 | 23 | 8  | 58  | 4  |
| 10 | 16  | 25 | 8  | 10 | 12  | 22 |
| 23 | 19  | 5  | 5  | 7  | 28  | 23 |
| 8  | 28  | 13 | 21 | 8  | 53  | 4  |
| 40 | 9   | 13 | 9  | 0  | 9   | 8  |
| 5  | 5   | 13 | 8  | 5  | 3   | 8  |
| 21 | 37  | 1  | 2  | 1  | 50  | 10 |
| 18 | 12  | 13 | 6  | 5  | 19  | 10 |
| 0  | 145 | 0  | 1  | 0  | 212 | 1  |
| 4  | 19  | 16 | 8  | 5  | 10  | 12 |
| 18 | 17  | 9  | 1  | 3  | 22  | 27 |
| 8  | 19  | 10 | 4  | 2  | 20  | 28 |
| 60 | 3   | 12 | 0  | 5  | 9   | 3  |
| 14 | 44  | 7  | 13 | 7  | 64  | 7  |
| 0  | 120 | 3  | 1  | 1  | 167 | 1  |
| 5  | 18  | 4  | 3  | 5  | 15  | 8  |
| 12 | 47  | 2  | 8  | 8  | 67  | 6  |
| 0  | 0   | 0  | 0  | 0  | 0   | 0  |
| 8  | 14  | 11 | 7  | 6  | 20  | 22 |
| 24 | 12  | 13 | 8  | 16 | 16  | 7  |
| 11 | 8   | 11 | 4  | 4  | 16  | 14 |
| 56 | 1   | 15 | 2  | 16 | 10  | 3  |
| 15 | 12  | 14 | 5  | 1  | 16  | 5  |
| 54 | 0   | 11 | 3  | 3  | 6   | 1  |
| 21 | 21  | 11 | 4  | 3  | 17  | 7  |
| 13 | 1   | 13 | 10 | 3  | 3   | 17 |
| 15 | 1   | 12 | 7  | 1  | 3   | 9  |
| 12 | 36  | 2  | 7  | 8  | 49  | 6  |
| 39 | 3   | 7  | 0  | 2  | 5   | 4  |
| 2  | 88  | 0  | 2  | 1  | 183 | 3  |
| 6  | 62  | 8  | 6  | 5  | 100 | 4  |
| 20 | 14  | 8  | 7  | 3  | 33  | 0  |
| 12 | 12  | 7  | 7  | 2  | 6   | 9  |
| 11 | 29  | 0  | 4  | 2  | 36  | 6  |
| 8  | 11  | 11 | 4  | 0  | 4   | 5  |
| 37 | 4   | 6  | 2  | 4  | 3   | 1  |
| 10 | 25  | 1  | 13 | 4  | 29  | 1  |
| 12 | 9   | 3  | 8  | 3  | 17  | 10 |
| 7  | 28  | 7  | 3  | 1  | 23  | 4  |
| 8  | 13  | 3  | 1  | 0  | 8   | 7  |

|    |     |    |    |    |    |    |
|----|-----|----|----|----|----|----|
| 29 | 6   | 7  | 1  | 1  | 8  | 0  |
| 56 | 1   | 8  | 1  | 11 | 18 | 8  |
| 9  | 7   | 13 | 4  | 1  | 1  | 3  |
| 7  | 6   | 11 | 5  | 4  | 10 | 10 |
| 18 | 8   | 6  | 1  | 2  | 15 | 16 |
| 6  | 15  | 3  | 7  | 2  | 19 | 1  |
| 3  | 10  | 7  | 0  | 1  | 24 | 15 |
| 13 | 8   | 2  | 5  | 3  | 5  | 5  |
| 15 | 3   | 5  | 2  | 2  | 6  | 4  |
| 7  | 3   | 15 | 3  | 1  | 4  | 11 |
| 11 | 10  | 0  | 4  | 4  | 18 | 2  |
| 16 | 5   | 7  | 3  | 3  | 19 | 12 |
| 0  | 24  | 0  | 2  | 1  | 54 | 0  |
| 0  | 41  | 0  | 4  | 4  | 54 | 0  |
| 9  | 20  | 4  | 2  | 2  | 50 | 9  |
| 6  | 10  | 7  | 2  | 3  | 25 | 3  |
| 17 | 6   | 7  | 2  | 0  | 6  | 6  |
| 7  | 7   | 15 | 8  | 2  | 8  | 1  |
| 2  | 14  | 7  | 0  | 1  | 2  | 10 |
| 9  | 7   | 6  | 10 | 7  | 16 | 11 |
| 3  | 1   | 1  | 3  | 1  | 2  | 6  |
| 8  | 24  | 0  | 2  | 3  | 17 | 0  |
| 7  | 5   | 4  | 6  | 0  | 7  | 5  |
| 29 | 4   | 8  | 1  | 0  | 3  | 3  |
| 14 | 1   | 5  | 2  | 6  | 7  | 2  |
| 34 | 2   | 4  | 0  | 1  | 4  | 1  |
| 7  | 0   | 8  | 2  | 0  | 3  | 3  |
| 7  | 7   | 2  | 2  | 0  | 10 | 2  |
| 22 | 9   | 4  | 3  | 2  | 15 | 2  |
| 7  | 4   | 5  | 0  | 2  | 6  | 7  |
| 6  | 8   | 5  | 4  | 4  | 4  | 4  |
| 6  | 5   | 4  | 6  | 3  | 4  | 4  |
| 0  | 101 | 1  | 2  | 1  | 63 | 0  |
| 13 | 4   | 9  | 9  | 5  | 7  | 6  |
| 4  | 25  | 5  | 5  | 2  | 31 | 2  |
| 18 | 9   | 7  | 7  | 0  | 18 | 6  |
| 8  | 3   | 1  | 2  | 1  | 1  | 3  |
| 8  | 4   | 7  | 0  | 1  | 5  | 5  |
| 16 | 27  | 1  | 1  | 0  | 46 | 27 |
| 3  | 4   | 1  | 4  | 0  | 23 | 6  |
| 8  | 2   | 0  | 0  | 0  | 6  | 1  |
| 11 | 3   | 0  | 0  | 0  | 0  | 1  |
| 6  | 2   | 0  | 1  | 1  | 3  | 1  |
| 8  | 3   | 9  | 6  | 1  | 7  | 2  |
| 3  | 2   | 7  | 1  | 0  | 7  | 11 |
| 4  | 6   | 4  | 3  | 0  | 4  | 6  |
| 8  | 3   | 2  | 0  | 1  | 12 | 5  |
| 8  | 20  | 2  | 1  | 3  | 51 | 0  |
| 7  | 6   | 0  | 0  | 3  | 21 | 2  |
| 7  | 7   | 2  | 1  | 2  | 6  | 2  |
| 4  | 2   | 5  | 2  | 0  | 3  | 4  |
| 7  | 12  | 3  | 1  | 0  | 10 | 5  |
| 10 | 7   | 0  | 2  | 0  | 2  | 2  |
| 1  | 39  | 1  | 3  | 2  | 53 | 0  |
| 2  | 30  | 4  | 0  | 2  | 3  | 7  |
| 3  | 7   | 0  | 1  | 0  | 9  | 0  |
| 1  | 23  | 3  | 3  | 1  | 9  | 6  |
| 5  | 3   | 8  | 4  | 3  | 3  | 4  |
| 0  | 20  | 2  | 2  | 1  | 17 | 0  |

|    |    |   |    |   |    |    |
|----|----|---|----|---|----|----|
| 2  | 6  | 1 | 2  | 0 | 12 | 3  |
| 0  | 6  | 3 | 0  | 3 | 6  | 1  |
| 2  | 10 | 4 | 2  | 0 | 8  | 5  |
| 3  | 17 | 4 | 11 | 0 | 4  | 2  |
| 5  | 3  | 2 | 0  | 0 | 8  | 6  |
| 11 | 3  | 3 | 1  | 0 | 9  | 2  |
| 14 | 5  | 3 | 2  | 1 | 3  | 3  |
| 2  | 17 | 0 | 0  | 1 | 26 | 1  |
| 1  | 32 | 0 | 2  | 1 | 31 | 2  |
| 4  | 2  | 6 | 0  | 0 | 3  | 8  |
| 1  | 2  | 7 | 1  | 1 | 6  | 4  |
| 9  | 5  | 4 | 1  | 2 | 8  | 28 |
| 5  | 2  | 0 | 2  | 0 | 3  | 4  |
| 3  | 14 | 0 | 0  | 0 | 11 | 0  |
| 13 | 3  | 2 | 1  | 0 | 0  | 1  |
| 1  | 27 | 0 | 0  | 1 | 41 | 0  |
| 15 | 1  | 7 | 1  | 3 | 3  | 2  |
| 3  | 1  | 5 | 3  | 0 | 7  | 1  |
| 6  | 5  | 1 | 0  | 1 | 5  | 4  |
| 5  | 3  | 3 | 1  | 3 | 3  | 4  |
| 5  | 0  | 1 | 0  | 2 | 5  | 8  |
| 2  | 2  | 0 | 1  | 1 | 7  | 3  |
| 7  | 14 | 1 | 3  | 1 | 7  | 0  |
| 13 | 1  | 2 | 0  | 0 | 5  | 1  |
| 2  | 1  | 5 | 3  | 2 | 7  | 2  |
| 7  | 5  | 3 | 0  | 0 | 3  | 6  |
| 1  | 1  | 5 | 2  | 0 | 1  | 0  |
| 6  | 7  | 1 | 2  | 0 | 8  | 3  |
| 4  | 4  | 4 | 1  | 1 | 2  | 5  |
| 1  | 9  | 4 | 6  | 1 | 13 | 1  |
| 3  | 9  | 0 | 0  | 0 | 4  | 0  |
| 1  | 3  | 4 | 1  | 1 | 4  | 4  |
| 23 | 0  | 2 | 1  | 0 | 8  | 2  |
| 2  | 10 | 0 | 0  | 2 | 16 | 0  |
| 2  | 0  | 1 | 0  | 4 | 0  | 1  |
| 2  | 1  | 1 | 0  | 1 | 3  | 2  |
| 1  | 33 | 0 | 0  | 2 | 16 | 0  |
| 3  | 2  | 3 | 1  | 0 | 7  | 2  |
| 3  | 5  | 1 | 0  | 2 | 1  | 1  |
| 0  | 1  | 7 | 0  | 3 | 11 | 1  |
| 5  | 7  | 5 | 2  | 1 | 18 | 1  |
| 3  | 1  | 0 | 0  | 0 | 1  | 3  |
| 0  | 6  | 2 | 0  | 1 | 6  | 0  |
| 0  | 69 | 1 | 0  | 0 | 9  | 0  |
| 3  | 6  | 5 | 1  | 2 | 6  | 4  |
| 4  | 0  | 1 | 1  | 0 | 4  | 6  |
| 4  | 0  | 0 | 0  | 0 | 0  | 0  |
| 3  | 10 | 0 | 3  | 0 | 10 | 3  |
| 3  | 2  | 3 | 3  | 0 | 8  | 1  |
| 0  | 3  | 1 | 0  | 0 | 5  | 0  |
| 1  | 11 | 0 | 3  | 0 | 13 | 0  |
| 1  | 33 | 1 | 1  | 0 | 58 | 1  |
| 0  | 33 | 0 | 0  | 0 | 43 | 0  |
| 2  | 7  | 1 | 0  | 0 | 6  | 1  |
| 2  | 1  | 2 | 0  | 0 | 1  | 2  |
| 2  | 2  | 1 | 2  | 1 | 7  | 0  |
| 3  | 2  | 2 | 0  | 0 | 1  | 2  |
| 6  | 3  | 3 | 5  | 5 | 6  | 3  |
| 1  | 32 | 0 | 0  | 0 | 40 | 0  |

|    |    |   |   |   |    |   |
|----|----|---|---|---|----|---|
| 11 | 3  | 1 | 0 | 1 | 7  | 1 |
| 11 | 1  | 2 | 1 | 2 | 9  | 0 |
| 0  | 8  | 0 | 1 | 0 | 2  | 1 |
| 4  | 2  | 3 | 3 | 0 | 1  | 0 |
| 0  | 2  | 1 | 2 | 1 | 2  | 0 |
| 6  | 5  | 2 | 0 | 0 | 4  | 5 |
| 0  | 24 | 0 | 0 | 0 | 24 | 0 |
| 0  | 4  | 0 | 0 | 0 | 2  | 0 |
| 5  | 3  | 1 | 2 | 1 | 10 | 1 |
| 1  | 2  | 3 | 0 | 2 | 8  | 3 |
| 2  | 4  | 0 | 1 | 0 | 6  | 1 |
| 0  | 14 | 1 | 1 | 1 | 19 | 0 |
| 3  | 2  | 2 | 0 | 1 | 4  | 0 |
| 2  | 2  | 1 | 1 | 0 | 2  | 1 |
| 2  | 2  | 3 | 0 | 0 | 1  | 2 |
| 0  | 6  | 8 | 1 | 1 | 4  | 1 |
| 3  | 4  | 3 | 1 | 0 | 4  | 2 |
| 1  | 8  | 1 | 1 | 0 | 4  | 4 |
| 7  | 3  | 0 | 1 | 0 | 8  | 1 |
| 0  | 1  | 1 | 1 | 0 | 2  | 0 |
| 8  | 0  | 3 | 0 | 3 | 0  | 0 |
| 4  | 4  | 1 | 1 | 0 | 12 | 0 |
| 5  | 8  | 1 | 1 | 1 | 2  | 0 |
| 0  | 1  | 3 | 1 | 2 | 1  | 1 |
| 4  | 2  | 2 | 0 | 0 | 3  | 0 |
| 1  | 2  | 3 | 1 | 1 | 5  | 0 |
| 14 | 1  | 0 | 0 | 2 | 14 | 0 |
| 3  | 12 | 0 | 1 | 0 | 22 | 0 |
| 0  | 2  | 0 | 0 | 0 | 2  | 0 |
| 1  | 3  | 1 | 4 | 0 | 4  | 1 |
| 4  | 3  | 3 | 1 | 1 | 1  | 1 |
| 3  | 2  | 3 | 0 | 1 | 2  | 1 |
| 2  | 15 | 1 | 0 | 0 | 16 | 1 |
| 2  | 0  | 7 | 1 | 0 | 5  | 1 |
| 1  | 2  | 2 | 0 | 2 | 3  | 1 |
| 0  | 2  | 1 | 1 | 1 | 4  | 1 |
| 2  | 3  | 1 | 1 | 2 | 9  | 2 |
| 0  | 1  | 1 | 0 | 1 | 5  | 2 |
| 2  | 0  | 4 | 0 | 0 | 2  | 1 |
| 1  | 0  | 1 | 0 | 1 | 1  | 1 |
| 3  | 3  | 1 | 1 | 0 | 1  | 1 |
| 0  | 5  | 2 | 1 | 0 | 2  | 0 |
| 4  | 1  | 2 | 1 | 0 | 3  | 0 |
| 4  | 0  | 1 | 0 | 0 | 2  | 3 |
| 2  | 2  | 0 | 1 | 0 | 8  | 2 |
| 0  | 15 | 0 | 1 | 0 | 18 | 1 |
| 1  | 3  | 1 | 0 | 0 | 2  | 1 |
| 3  | 6  | 1 | 0 | 0 | 11 | 0 |
| 0  | 2  | 2 | 0 | 1 | 4  | 1 |
| 4  | 0  | 1 | 1 | 0 | 6  | 1 |
| 0  | 1  | 0 | 0 | 0 | 1  | 0 |
| 1  | 2  | 0 | 0 | 0 | 5  | 2 |
| 1  | 18 | 0 | 1 | 2 | 14 | 0 |
| 1  | 5  | 1 | 0 | 0 | 6  | 2 |
| 1  | 6  | 1 | 1 | 0 | 9  | 3 |
| 3  | 1  | 1 | 1 | 0 | 4  | 1 |
| 1  | 0  | 2 | 2 | 0 | 1  | 3 |
| 11 | 1  | 0 | 0 | 0 | 19 | 3 |
| 0  | 4  | 0 | 0 | 0 | 14 | 0 |



|         |         |        |        |        |         |         |
|---------|---------|--------|--------|--------|---------|---------|
| 57      | 58      | 59     | 60     | 61     | 62      | 63      |
| 30      | 31      | 32     | 33     | 34     | 35      | 36      |
| CHR_NP  | CHR_NP  | CHR_NP | CHR_NP | CHR_NP | CHR_NP  | CHR_NP  |
| F_39    | G_3     | G_30   | G_31   | G_32   | G_4     | G_5     |
| 1856730 | 2304707 | 924323 | 555209 | 358914 | 3926455 | 1257195 |
| CHR_NP  | CHR_NP  | CHR_NP | CHR_NP | CHR_NP | CHR_NP  | CHR_NP  |
| 13.95   | 4.86    | 8.19   | 3.59   | 2.52   | 6.08    | 14.88   |
| 2.34    | 1.19    | 3.15   | 4.90   | 4.71   | 1.42    | 2.50    |
| 1.90    | 1.04    | 4.06   | 2.58   | 4.61   | 0.67    | 1.80    |
| 2.17    | 1.73    | 2.68   | 3.80   | 3.81   | 1.68    | 2.71    |
| 1.41    | 1.65    | 4.46   | 3.43   | 3.15   | 1.28    | 2.72    |
| 1.29    | 4.97    | 0.36   | 1.44   | 1.79   | 5.69    | 0.37    |
| 1.09    | 2.16    | 1.52   | 2.91   | 3.09   | 2.14    | 0.96    |
| 0.07    | 3.76    | 0.05   | 0.24   | 0.30   | 2.59    | 0.09    |
| 0.81    | 1.95    | 0.49   | 0.63   | 0.35   | 1.83    | 0.26    |
| 0.66    | 0.80    | 0.66   | 0.60   | 0.42   | 1.07    | 0.49    |
| 0.72    | 0.54    | 0.32   | 0.53   | 0.27   | 0.49    | 0.23    |
| 0.51    | 0.37    | 0.57   | 0.77   | 0.63   | 0.36    | 0.52    |
| 0.49    | 0.88    | 0.61   | 0.88   | 0.86   | 0.69    | 0.22    |
| 0.36    | 0.26    | 0.49   | 0.45   | 0.37   | 0.29    | 0.67    |
| 0.18    | 0.78    | 0.09   | 0.40   | 0.32   | 0.71    | 0.04    |
| 0.27    | 0.07    | 0.16   | 0.08   | 0.05   | 0.07    | 0.19    |
| 0.12    | 0.68    | 0.10   | 0.38   | 0.40   | 0.55    | 0.05    |
| 0.20    | 0.15    | 0.13   | 0.29   | 0.26   | 0.16    | 0.07    |
| 0.15    | 0.53    | 0.21   | 0.31   | 0.30   | 0.59    | 0.10    |
| 0.14    | 0.16    | 0.33   | 0.30   | 0.24   | 0.15    | 0.13    |
| 0.12    | 0.10    | 0.17   | 0.16   | 0.12   | 0.08    | 0.10    |
| 0.13    | 0.15    | 0.17   | 0.17   | 0.11   | 0.19    | 0.15    |
| 0.14    | 0.14    | 0.11   | 0.10   | 0.06   | 0.18    | 0.10    |
| 0.05    | 0.22    | 0.20   | 0.32   | 0.43   | 0.15    | 0.09    |
| 0.05    | 0.32    | 0.13   | 0.15   | 0.26   | 0.22    | 0.03    |
| 0.15    | 0.09    | 0.07   | 0.04   | 0.04   | 0.06    | 0.09    |
| 0.14    | 0.09    | 0.26   | 0.21   | 0.19   | 0.08    | 0.19    |
| 0.07    | 0.25    | 0.03   | 0.08   | 0.10   | 0.35    | 0.07    |
| 0.15    | 0.08    | 0.07   | 0.14   | 0.15   | 0.12    | 0.06    |
| 0.17    | 0.07    | 0.14   | 0.13   | 0.08   | 0.07    | 0.11    |
| 0.10    | 0.11    | 0.10   | 0.24   | 0.21   | 0.10    | 0.07    |
| 0.08    | 0.11    | 0.17   | 0.16   | 0.16   | 0.10    | 0.17    |
| 0.04    | 0.37    | 0.03   | 0.10   | 0.09   | 0.33    | 0.04    |
| 0.02    | 0.43    | 0.02   | 0.07   | 0.05   | 0.22    | 0.01    |
| 0.14    | 0.07    | 0.06   | 0.13   | 0.14   | 0.11    | 0.05    |
| 0.09    | 0.05    | 0.11   | 0.16   | 0.28   | 0.08    | 0.18    |
| 0.07    | 0.07    | 0.07   | 0.15   | 0.14   | 0.10    | 0.03    |
| 0.07    | 0.09    | 0.06   | 0.08   | 0.19   | 0.06    | 0.03    |
| 0.04    | 0.02    | 0.13   | 0.12   | 0.09   | 0.04    | 0.10    |
| 0.02    | 0.06    | 0.15   | 0.06   | 0.04   | 0.06    | 0.18    |
| 0.03    | 0.01    | 0.09   | 0.09   | 0.11   | 0.01    | 0.05    |
| 0.04    | 0.07    | 0.12   | 0.13   | 0.11   | 0.03    | 0.06    |
| 0.06    | 0.03    | 0.06   | 0.07   | 0.08   | 0.03    | 0.07    |
| 0.01    | 0.18    | 0.01   | 0.03   | 0.04   | 0.26    | 0.01    |
| 0.03    | 0.04    | 0.06   | 0.05   | 0.08   | 0.02    | 0.03    |
| 0.06    | 0.03    | 0.06   | 0.09   | 0.06   | 0.02    | 0.03    |
| 0.06    | 0.06    | 0.03   | 0.07   | 0.04   | 0.05    | 0.04    |
| 0.04    | 0.02    | 0.07   | 0.05   | 0.03   | 0.03    | 0.06    |
| 0.01    | 0.22    | 0.00   | 0.01   | 0.01   | 0.18    | 0.01    |
| 0.01    | 0.06    | 0.01   | 0.01   | 0.00   | 0.07    | 0.01    |
| 0.12    | 0.00    | 0.05   | 0.01   | 0.02   | 0.00    | 0.01    |
| 0.02    | 0.02    | 0.03   | 0.06   | 0.07   | 0.02    | 0.01    |



|      |      |      |      |      |      |      |
|------|------|------|------|------|------|------|
| 0.04 | 0.02 | 0.04 | 0.05 | 0.04 | 0.02 | 0.04 |
| 0.02 | 0.02 | 0.02 | 0.02 | 0.01 | 0.02 | 0.01 |
| 0.02 | 0.04 | 0.00 | 0.00 | 0.00 | 0.04 | 0.02 |
| 0.00 | 0.22 | 0.00 | 0.00 | 0.00 | 0.15 | 0.00 |
| 0.03 | 0.03 | 0.03 | 0.05 | 0.06 | 0.03 | 0.03 |
| 0.01 | 0.04 | 0.03 | 0.05 | 0.04 | 0.02 | 0.02 |
| 0.03 | 0.03 | 0.05 | 0.06 | 0.05 | 0.01 | 0.02 |
| 0.05 | 0.01 | 0.05 | 0.08 | 0.08 | 0.01 | 0.04 |
| 0.02 | 0.01 | 0.03 | 0.06 | 0.05 | 0.01 | 0.02 |
| 0.01 | 0.03 | 0.02 | 0.02 | 0.02 | 0.02 | 0.02 |
| 0.01 | 0.16 | 0.00 | 0.01 | 0.00 | 0.12 | 0.00 |
| 0.00 | 0.11 | 0.00 | 0.00 | 0.01 | 0.08 | 0.00 |
| 0.04 | 0.01 | 0.02 | 0.02 | 0.01 | 0.01 | 0.03 |
| 0.01 | 0.04 | 0.01 | 0.03 | 0.03 | 0.05 | 0.01 |
| 0.01 | 0.06 | 0.01 | 0.02 | 0.02 | 0.04 | 0.01 |
| 0.01 | 0.09 | 0.01 | 0.01 | 0.02 | 0.07 | 0.01 |
| 0.01 | 0.02 | 0.01 | 0.02 | 0.03 | 0.01 | 0.00 |
| 0.03 | 0.01 | 0.00 | 0.01 | 0.01 | 0.02 | 0.02 |
| 0.02 | 0.00 | 0.02 | 0.03 | 0.03 | 0.00 | 0.01 |
| 0.02 | 0.00 | 0.01 | 0.01 | 0.01 | 0.00 | 0.01 |
| 0.01 | 0.05 | 0.00 | 0.01 | 0.01 | 0.05 | 0.00 |
| 0.02 | 0.02 | 0.01 | 0.01 | 0.00 | 0.02 | 0.01 |
| 0.01 | 0.03 | 0.02 | 0.04 | 0.06 | 0.02 | 0.01 |
| 0.07 | 0.00 | 0.03 | 0.01 | 0.04 | 0.01 | 0.01 |
| 0.01 | 0.01 | 0.01 | 0.00 | 0.00 | 0.02 | 0.02 |
| 0.03 | 0.01 | 0.01 | 0.01 | 0.02 | 0.01 | 0.03 |
| 0.01 | 0.01 | 0.02 | 0.03 | 0.02 | 0.01 | 0.02 |
| 0.01 | 0.00 | 0.01 | 0.02 | 0.02 | 0.00 | 0.00 |
| 0.01 | 0.01 | 0.01 | 0.01 | 0.01 | 0.02 | 0.01 |
| 0.01 | 0.00 | 0.01 | 0.00 | 0.00 | 0.00 | 0.01 |
| 0.01 | 0.00 | 0.01 | 0.02 | 0.01 | 0.01 | 0.02 |
| 0.00 | 0.02 | 0.00 | 0.01 | 0.00 | 0.01 | 0.00 |
| 0.01 | 0.02 | 0.00 | 0.01 | 0.01 | 0.02 | 0.01 |
| 0.00 | 0.01 | 0.01 | 0.00 | 0.00 | 0.00 | 0.01 |
| 0.01 | 0.00 | 0.01 | 0.02 | 0.01 | 0.00 | 0.01 |
| 0.00 | 0.04 | 0.00 | 0.01 | 0.01 | 0.03 | 0.00 |
| 0.01 | 0.01 | 0.01 | 0.02 | 0.02 | 0.01 | 0.00 |
| 0.01 | 0.01 | 0.02 | 0.02 | 0.02 | 0.00 | 0.01 |
| 0.01 | 0.01 | 0.01 | 0.01 | 0.01 | 0.01 | 0.01 |
| 0.00 | 0.05 | 0.00 | 0.00 | 0.00 | 0.05 | 0.00 |
| 0.00 | 0.01 | 0.01 | 0.00 | 0.00 | 0.00 | 0.01 |
| 0.01 | 0.01 | 0.00 | 0.01 | 0.01 | 0.01 | 0.00 |
| 0.00 | 0.02 | 0.00 | 0.00 | 0.00 | 0.02 | 0.00 |
| 0.00 | 0.01 | 0.00 | 0.01 | 0.01 | 0.01 | 0.00 |
| 0.01 | 0.00 | 0.01 | 0.01 | 0.01 | 0.00 | 0.00 |
| 0.01 | 0.00 | 0.02 | 0.01 | 0.02 | 0.00 | 0.01 |
| 0.00 | 0.03 | 0.00 | 0.01 | 0.00 | 0.03 | 0.00 |
| 0.00 | 0.00 | 0.00 | 0.00 | 0.01 | 0.00 | 0.00 |
| 0.00 | 0.01 | 0.01 | 0.01 | 0.01 | 0.01 | 0.01 |
| 0.01 | 0.00 | 0.01 | 0.01 | 0.01 | 0.00 | 0.01 |
| 0.00 | 0.02 | 0.01 | 0.01 | 0.02 | 0.01 | 0.00 |
| 0.01 | 0.01 | 0.00 | 0.01 | 0.00 | 0.01 | 0.00 |
| 0.00 | 0.02 | 0.00 | 0.00 | 0.00 | 0.02 | 0.00 |
| 0.00 | 0.00 | 0.00 | 0.01 | 0.01 | 0.00 | 0.00 |
| 0.01 | 0.00 | 0.01 | 0.01 | 0.02 | 0.00 | 0.00 |
| 0.00 | 0.02 | 0.00 | 0.01 | 0.01 | 0.01 | 0.00 |
| 0.00 | 0.02 | 0.00 | 0.01 | 0.01 | 0.02 | 0.00 |
| 0.00 | 0.01 | 0.01 | 0.01 | 0.01 | 0.00 | 0.00 |







|       |       |       |       |       |       |       |
|-------|-------|-------|-------|-------|-------|-------|
| 0.43  | 2.70  | -0.20 | 0.08  | -0.48 | 2.45  | -0.65 |
| -0.26 | 0.10  | -0.27 | -0.41 | -0.88 | 0.80  | -0.70 |
| 0.94  | 0.26  | -0.56 | 0.22  | -0.76 | 0.09  | -0.92 |
| 0.20  | -1.13 | 0.73  | 2.52  | 1.27  | -1.15 | 0.27  |
| 0.74  | 2.98  | 1.44  | 2.98  | 2.87  | 1.90  | -0.78 |
| -0.62 | -1.21 | 0.12  | -0.12 | -0.54 | -1.03 | 1.15  |
| -0.20 | 2.56  | -0.59 | 0.82  | 0.45  | 2.24  | -0.81 |
| -0.12 | -0.98 | -0.60 | -0.93 | -1.05 | -1.00 | -0.46 |
| -0.23 | 3.28  | -0.37 | 1.38  | 1.52  | 2.50  | -0.65 |
| -0.15 | -0.66 | -0.80 | 0.71  | 0.50  | -0.58 | -1.46 |
| -0.32 | 3.12  | 0.25  | 1.17  | 1.04  | 3.62  | -0.70 |
| -0.90 | -0.74 | 1.00  | 0.70  | 0.13  | -0.78 | -1.04 |
| -0.66 | -0.92 | 0.18  | 0.00  | -0.57 | -1.16 | -0.95 |
| -0.27 | 0.02  | 0.31  | 0.22  | -0.67 | 0.60  | -0.01 |
| 0.32  | 0.21  | -0.07 | -0.18 | -0.77 | 0.77  | -0.22 |
| -0.70 | 0.91  | 0.76  | 1.94  | 2.97  | 0.25  | -0.26 |
| -0.49 | 1.14  | 0.02  | 0.10  | 0.77  | 0.53  | -0.61 |
| 0.62  | -0.52 | -0.79 | -1.37 | -1.43 | -0.95 | -0.48 |
| 0.07  | -0.83 | 1.87  | 1.12  | 0.80  | -0.97 | 0.87  |
| -0.38 | 1.33  | -0.78 | -0.33 | -0.08 | 2.29  | -0.40 |
| 0.90  | -0.48 | -0.75 | 0.58  | 0.86  | 0.17  | -0.99 |
| 1.59  | -0.83 | 0.97  | 0.65  | -0.59 | -0.76 | 0.30  |
| 0.20  | 0.51  | 0.33  | 3.47  | 2.90  | 0.17  | -0.54 |
| -0.72 | -0.21 | 0.87  | 0.79  | 0.83  | -0.46 | 0.84  |
| -0.28 | 4.64  | -0.43 | 0.64  | 0.46  | 4.03  | -0.32 |
| -0.30 | 1.96  | -0.32 | 0.00  | -0.12 | 0.79  | -0.36 |
| 1.06  | -0.49 | -0.67 | 0.77  | 1.02  | 0.25  | -0.96 |
| -0.31 | -0.56 | -0.19 | 0.11  | 0.83  | -0.36 | 0.21  |
| -0.48 | -0.48 | -0.52 | 0.45  | 0.30  | -0.19 | -0.98 |
| -0.22 | 0.00  | -0.36 | -0.08 | 0.97  | -0.38 | -0.68 |
| -0.75 | -0.93 | 0.37  | 0.28  | -0.17 | -0.71 | 0.06  |
| -0.63 | -0.35 | 0.40  | -0.33 | -0.45 | -0.30 | 0.62  |
| -0.89 | -1.33 | 0.37  | 0.33  | 0.60  | -1.31 | -0.58 |
| -0.81 | 0.05  | 1.69  | 1.93  | 1.39  | -1.11 | -0.18 |
| -0.20 | -1.47 | -0.03 | 0.38  | 0.84  | -1.29 | 0.36  |
| -0.67 | 3.52  | -0.79 | -0.09 | -0.05 | 5.44  | -0.78 |
| -0.76 | -0.58 | 0.01  | -0.23 | 0.44  | -0.88 | -0.74 |
| 0.81  | -1.18 | 1.34  | 3.04  | 0.71  | -1.74 | -1.13 |
| 0.66  | 0.78  | -0.35 | 0.99  | 0.07  | 0.38  | -0.11 |
| -0.27 | -0.99 | 0.69  | 0.02  | -0.80 | -0.74 | 0.33  |
| -0.15 | 7.33  | -0.30 | -0.01 | -0.11 | 5.92  | -0.09 |
| -0.51 | 0.77  | -0.53 | -0.44 | -0.58 | 0.96  | -0.55 |
| 4.53  | -1.76 | 0.82  | -1.17 | -0.98 | -1.71 | -1.35 |
| -0.41 | -0.33 | -0.19 | 0.86  | 1.11  | -0.52 | -0.72 |
| 0.02  | -1.10 | 0.24  | 1.20  | 0.66  | -1.50 | 0.44  |
| -0.61 | -0.72 | -0.64 | -0.56 | -1.07 | -0.60 | -1.10 |
| -0.39 | 1.09  | -1.19 | -1.32 | -1.36 | 0.74  | -0.17 |

|       |       |       |       |       |       |       |
|-------|-------|-------|-------|-------|-------|-------|
| -0.25 | 8.65  | -0.33 | -0.25 | -0.31 | 5.85  | -0.27 |
| -0.17 | 0.07  | 0.25  | 1.94  | 2.73  | 0.27  | 0.01  |
| -1.17 | 0.93  | 0.55  | 1.93  | 0.98  | -0.32 | -0.55 |
| 0.04  | 0.09  | 1.22  | 2.41  | 1.71  | -1.37 | -0.63 |
| 0.19  | -0.78 | 0.28  | 0.93  | 1.15  | -0.85 | 0.08  |
| -0.15 | -0.98 | 0.08  | 2.72  | 2.01  | -1.28 | -0.74 |
| -1.04 | 0.42  | -0.17 | 0.15  | -0.50 | -0.47 | -0.43 |
| -0.24 | 11.46 | -0.61 | -0.29 | -0.36 | 8.89  | -0.51 |
| -0.24 | 4.81  | -0.25 | -0.19 | -0.06 | 3.55  | -0.24 |
| 0.53  | -1.25 | -0.68 | -0.43 | -0.93 | -0.96 | 0.32  |
| -0.41 | 2.52  | -0.15 | 0.98  | 1.64  | 3.12  | -0.75 |
| -0.07 | 3.23  | -0.36 | 0.66  | 0.37  | 1.93  | -0.48 |
| -0.43 | 7.69  | -0.52 | 0.44  | 0.99  | 5.62  | -0.51 |
| -0.60 | 0.66  | -0.36 | 0.29  | 1.73  | -0.75 | -0.96 |
| -0.10 | -0.27 | -0.37 | -0.35 | -0.34 | -0.21 | -0.19 |
| -0.38 | -1.23 | -0.33 | 0.48  | 0.37  | -1.31 | -0.53 |
| -0.02 | -1.58 | -0.58 | -1.25 | -1.28 | -1.61 | -0.92 |
| -0.41 | 4.07  | -0.61 | 0.31  | 0.12  | 3.39  | -0.77 |
| 0.17  | 0.44  | -0.66 | -0.97 | -1.25 | 0.92  | -0.16 |
| 0.03  | 2.18  | 0.74  | 3.60  | 5.59  | 0.90  | -0.39 |
| 4.04  | -1.23 | 1.27  | -0.71 | 2.18  | -0.59 | -0.98 |
| -0.34 | -0.28 | -0.83 | -1.50 | -1.52 | 0.07  | 0.87  |
| 0.32  | -0.27 | -0.21 | -0.22 | -0.03 | -0.29 | 0.28  |
| -0.67 | -0.92 | 0.46  | 0.74  | 0.38  | -1.10 | -0.20 |
| -0.35 | -0.92 | -0.58 | 0.53  | 0.52  | -1.15 | -1.03 |
| 0.15  | 0.44  | -0.96 | 0.37  | 0.46  | 1.17  | -0.59 |
| -0.44 | -1.08 | -0.11 | -1.29 | -1.49 | -1.23 | -0.30 |
| -0.60 | -1.31 | -0.39 | 0.04  | -0.32 | -0.91 | -0.06 |
| -0.30 | 0.27  | -0.43 | 0.04  | -0.35 | -0.03 | -0.45 |
| -0.35 | 2.32  | -0.62 | 1.06  | 0.43  | 1.39  | -0.05 |
| -0.70 | -0.62 | -0.17 | -0.71 | -0.73 | -1.04 | -0.39 |
| -0.04 | -1.92 | 0.25  | 0.39  | 0.17  | -1.83 | -0.46 |
| -0.24 | 5.73  | -0.47 | 0.88  | 1.32  | 3.73  | -0.62 |
| 0.34  | -0.14 | 0.66  | 2.90  | 2.68  | -0.29 | -1.03 |
| 0.17  | -0.70 | 1.06  | 0.70  | 0.52  | -1.04 | -0.42 |
| 0.06  | -0.48 | 0.28  | -0.07 | -0.46 | -0.70 | 0.22  |
| -0.24 | 8.69  | -0.28 | -0.24 | -0.19 | 8.22  | -0.06 |
| -0.90 | -0.36 | 0.56  | -0.68 | -0.85 | -0.97 | -0.41 |
| 0.50  | 1.25  | -0.29 | 0.47  | 0.47  | 0.78  | -0.62 |
| -0.22 | 2.75  | -0.62 | -0.29 | -0.19 | 3.23  | -0.52 |
| -0.38 | 0.51  | -0.41 | 1.07  | 1.65  | -0.05 | -0.97 |
| -0.26 | -1.38 | 0.58  | 1.25  | 0.18  | -1.48 | -0.75 |
| -0.39 | -1.70 | 0.32  | 0.94  | -0.87 | -1.50 | 0.17  |
| -0.43 | -1.05 | 3.02  | 1.40  | 1.84  | -1.26 | -0.24 |
| -0.11 | 5.38  | -0.60 | 0.34  | 0.19  | 6.59  | -0.64 |
| -0.59 | -0.62 | -0.21 | -0.30 | 0.07  | -0.65 | -0.34 |
| -0.19 | 0.44  | 1.03  | 2.11  | 0.31  | 0.84  | 0.09  |
| -0.31 | -0.59 | 1.55  | 1.19  | 1.42  | -1.03 | -0.46 |

|       |       |       |       |       |       |       |
|-------|-------|-------|-------|-------|-------|-------|
| -0.28 | 0.72  | -0.23 | 0.01  | 0.61  | 0.09  | -0.39 |
| 0.17  | 1.99  | -1.09 | 0.51  | -0.33 | 2.90  | -1.18 |
| -0.52 | 5.80  | -0.52 | 0.00  | 0.01  | 4.37  | -0.47 |
| -0.28 | -0.69 | -0.15 | 0.84  | 0.61  | -1.24 | -0.82 |
| -0.22 | -0.44 | 0.17  | 0.85  | 1.61  | -0.49 | -0.44 |
| -0.07 | 4.61  | -0.76 | 0.93  | 1.08  | 3.12  | -0.66 |
| -0.45 | 8.04  | 0.14  | 0.90  | 1.51  | 6.51  | -0.52 |
| -0.75 | 1.39  | 0.68  | 1.48  | 0.96  | 0.22  | -1.20 |
| -0.34 | -0.72 | 1.59  | 0.34  | 0.81  | -1.36 | -0.68 |
| -0.72 | -0.81 | 1.63  | 1.23  | 1.52  | -0.70 | 0.89  |
| -0.41 | 3.54  | -0.55 | 0.24  | 0.28  | 6.13  | -0.58 |
| -0.03 | 0.81  | 2.36  | 1.36  | 1.12  | -0.05 | -0.47 |
| 0.43  | -1.15 | 1.64  | 1.58  | 0.48  | -1.27 | -1.04 |
| -0.66 | 4.39  | -0.74 | -0.13 | -0.97 | -0.13 | -1.21 |
| 0.58  | 1.95  | -0.39 | 2.51  | 2.77  | 0.92  | -0.93 |
| 0.58  | 1.95  | -0.39 | 2.51  | 2.77  | 0.92  | -0.93 |
| -0.74 | -0.28 | -0.22 | 0.57  | 1.88  | -0.91 | -0.64 |
| 0.14  | -0.48 | -0.37 | -0.48 | -0.95 | -0.75 | 0.27  |
| 0.08  | -1.54 | -0.77 | -1.22 | -1.15 | -1.83 | -0.97 |
| 1.44  | -0.43 | 0.13  | -0.75 | -0.32 | 1.32  | -0.81 |
| -0.16 | -0.56 | -0.42 | 0.13  | -0.29 | -0.18 | -0.58 |
| -0.25 | 11.42 | -0.30 | -0.15 | -0.19 | 5.97  | -0.23 |
| -0.12 | -1.02 | -0.35 | 1.20  | 0.50  | -1.07 | -0.71 |
| 0.11  | -0.37 | 0.49  | 0.33  | 0.96  | -0.66 | 0.10  |
| 0.30  | -0.75 | -0.12 | -0.44 | -0.94 | -1.01 | -0.88 |
| -0.67 | -1.00 | -0.38 | -0.54 | -0.73 | -1.04 | -0.61 |
| -0.23 | -0.47 | 1.06  | 1.00  | 0.61  | -0.69 | -0.40 |
| 0.58  | 0.92  | -0.55 | -0.71 | -0.76 | 1.92  | 5.07  |
| -0.08 | -0.20 | 0.52  | 2.99  | 1.83  | -0.63 | -0.15 |
| 0.42  | 0.66  | 0.28  | 1.59  | 0.37  | 0.48  | -0.67 |
| -0.35 | -0.92 | -0.48 | -0.35 | -0.12 | -0.84 | -0.38 |
| -0.13 | 3.36  | -0.40 | -0.21 | -0.54 | 1.84  | -0.34 |
| -0.11 | 0.22  | 0.17  | 0.76  | 0.10  | -0.88 | -0.99 |

| 20                                                                                          | 21        | 22         | 23         | 24          | 25         | 26          |
|---------------------------------------------------------------------------------------------|-----------|------------|------------|-------------|------------|-------------|
| 56                                                                                          | 57        | 58         | 59         | 60          | 61         | 62          |
| CTTTCAGTCGGAT CAACACCAGTCG TACAGTACTGT (AATGACACGAT AACATTCAACCT (TTAATGCTAATCC TCCTGAGACCC |           |            |            |             |            |             |
| miR-30e-3p                                                                                  | miR-21-3p | miR-101-3p | miR-425-5p | miR-181c-5p | miR-155-5p | miR-125a-5p |
| 138740                                                                                      | 137573    | 134502     | 127210     | 125038      | 122415     | 115160      |
| -0.84                                                                                       | 0.08      | -0.13      | -0.26      | -0.50       | 1.04       | -0.59       |
| -0.78                                                                                       | -1.38     | -0.38      | 0.03       | -1.47       | 0.07       | 2.00        |
| 0.98                                                                                        | -0.98     | -0.16      | 1.92       | -0.55       | -0.49      | -0.45       |
| -0.11                                                                                       | -0.29     | -0.22      | -0.63      | -0.98       | -0.60      | -0.58       |
| -0.71                                                                                       | -1.36     | -0.32      | 2.63       | 0.26        | 2.92       | 2.75        |
| -0.26                                                                                       | 0.30      | -0.29      | -0.62      | -0.88       | 1.53       | -0.48       |
| -0.23                                                                                       | 0.40      | -0.22      | -1.13      | -0.27       | 0.89       | -0.33       |
| -0.11                                                                                       | -1.03     | -0.32      | -0.89      | 0.06        | -1.16      | -0.47       |
| -0.63                                                                                       | -0.83     | -0.34      | 0.01       | -1.04       | -1.52      | -0.55       |
| -0.81                                                                                       | -0.82     | -0.23      | -0.20      | -1.47       | -0.63      | -0.75       |
| 1.28                                                                                        | 0.16      | -0.21      | 0.29       | 0.04        | -0.39      | 0.22        |
| 0.01                                                                                        | -0.39     | -0.33      | -1.51      | 0.05        | 0.37       | 0.34        |
| 1.70                                                                                        | 0.73      | 0.81       | 0.92       | 2.83        | 0.30       | -0.47       |
| -0.45                                                                                       | -0.89     | -0.34      | -1.00      | -0.52       | -0.73      | -0.28       |
| 0.33                                                                                        | 0.25      | -0.24      | 1.11       | -0.10       | -0.20      | -0.34       |
| 0.87                                                                                        | 0.74      | -0.03      | 1.17       | 1.24        | 0.31       | -0.55       |
| -0.73                                                                                       | 2.00      | -0.32      | 0.70       | 0.00        | -0.36      | -0.09       |
| -0.44                                                                                       | -0.26     | 0.04       | 0.16       | 0.46        | -0.07      | -0.66       |
| 3.16                                                                                        | 0.37      | -0.23      | -0.43      | 0.62        | 0.33       | -0.70       |
| 1.62                                                                                        | 1.61      | 4.85       | 0.05       | 1.60        | -0.63      | -0.73       |

|       |       |       |       |       |       |       |
|-------|-------|-------|-------|-------|-------|-------|
| -0.02 | -0.83 | -0.19 | -1.06 | -1.20 | 0.53  | -0.59 |
| -0.26 | 0.55  | -0.32 | -1.06 | 1.50  | -0.54 | 0.63  |
| -0.44 | 0.90  | -0.25 | -0.72 | 0.66  | -0.13 | 0.11  |
| -1.03 | 0.46  | -0.25 | -1.10 | -0.36 | -0.04 | -0.42 |
| -1.02 | -1.37 | -0.34 | 0.54  | -0.69 | -1.33 | 2.90  |
| -0.81 | -0.46 | -0.32 | 0.82  | 0.64  | 1.75  | 0.52  |
| -0.28 | 2.35  | 0.27  | 0.23  | 0.09  | -1.24 | -0.43 |
| 1.10  | 0.80  | 6.29  | 0.53  | -0.39 | -1.08 | -0.82 |
| 5.47  | 1.52  | -0.05 | -0.31 | -0.81 | -0.07 | -0.10 |
| 2.51  | -1.07 | -0.23 | -1.03 | -1.31 | -0.17 | -0.31 |
| -0.58 | -1.37 | -0.33 | -0.97 | -1.85 | -1.06 | 0.66  |
| 3.78  | -1.37 | -0.07 | -0.42 | -1.36 | -0.69 | -0.23 |
| -0.43 | -1.34 | -0.33 | 4.83  | 0.51  | -0.93 | 10.28 |
| 0.68  | 1.20  | -0.30 | 0.16  | 3.03  | -0.74 | -0.91 |
| -0.35 | -0.49 | -0.26 | 1.49  | 0.77  | -0.75 | -0.87 |
| 0.15  | -0.04 | -0.29 | -0.51 | 0.44  | 1.14  | -0.64 |
| -1.32 | -1.18 | -0.36 | -1.51 | -1.63 | -1.83 | -0.76 |
| 1.26  | 0.41  | 0.13  | -0.80 | 0.01  | 0.87  | -0.83 |
| 0.81  | -0.19 | 1.06  | 1.79  | 1.78  | 1.45  | -0.78 |
| 0.56  | -0.31 | -0.31 | -0.28 | 1.51  | 0.70  | -0.11 |
| -1.32 | 3.05  | -0.23 | 0.22  | -1.56 | -1.51 | -0.27 |
| -1.18 | 5.66  | -0.17 | 3.05  | -1.01 | -1.30 | 0.65  |
| -0.63 | 0.15  | -0.31 | 0.14  | -0.49 | -0.60 | 0.22  |
| 1.23  | 1.96  | 0.25  | 1.17  | 0.39  | 0.06  | -0.25 |
| 0.95  | -0.83 | -0.35 | -0.77 | -0.49 | -0.16 | -0.08 |
| -1.41 | 2.24  | -0.31 | -0.98 | -1.50 | -1.45 | -0.47 |
| 1.22  | 1.52  | -0.21 | 1.83  | 3.44  | -0.04 | -0.11 |
| 0.38  | 1.39  | -0.26 | -0.49 | 2.39  | -0.34 | -0.62 |
| -0.62 | -0.50 | -0.16 | 0.75  | 0.87  | -1.19 | -0.18 |
| -0.45 | 1.24  | -0.26 | 0.57  | 2.72  | 0.94  | -0.55 |
| -0.57 | -0.07 | -0.14 | 0.13  | 0.56  | 0.05  | -0.51 |
| -0.40 | 0.61  | -0.30 | -0.04 | -0.70 | 0.79  | 0.23  |
| -0.87 | -0.17 | -0.30 | -0.40 | -1.22 | -1.17 | -0.23 |
| -0.12 | -0.09 | -0.24 | 1.67  | 0.24  | 1.04  | 0.10  |
| 0.10  | -0.39 | -0.30 | -0.86 | -0.80 | -0.22 | -0.59 |
| -0.37 | 0.16  | -0.32 | 0.15  | -0.76 | -0.44 | 0.94  |
| -0.61 | -0.39 | -0.25 | -0.17 | -1.17 | 0.04  | 0.19  |
| -0.72 | 1.09  | 8.65  | 0.07  | 0.93  | 0.09  | -0.78 |
| -0.64 | -1.19 | -0.33 | 0.25  | 0.55  | 1.22  | 0.28  |
| -0.56 | -1.32 | -0.25 | 1.94  | 1.93  | 2.41  | 0.93  |
| -1.07 | -1.36 | -0.31 | 2.73  | 0.98  | 1.71  | 1.15  |
| -0.60 | 0.74  | 5.85  | 0.27  | -0.32 | -1.37 | -0.85 |
| -1.10 | -0.17 | -0.27 | 0.01  | -0.55 | -0.63 | 0.08  |
| -1.16 | 1.03  | -0.27 | -0.09 | -1.02 | -0.43 | -0.08 |
| -0.93 | 1.13  | -0.24 | 0.87  | -0.54 | -0.98 | -0.75 |
| 5.98  | -0.44 | 0.58  | -1.72 | -0.60 | -0.21 | -0.53 |
| -0.63 | -0.44 | 0.08  | 0.94  | -1.08 | -0.92 | -0.90 |
| 1.81  | -1.38 | -0.23 | 0.10  | -1.28 | 1.08  | 1.04  |
| -0.39 | -1.36 | -0.31 | 0.88  | -0.73 | 0.26  | -0.07 |
| 2.28  | -1.30 | -0.20 | 1.67  | 1.85  | 1.59  | 0.14  |
| 0.65  | -0.49 | -0.19 | -1.09 | -0.67 | -0.31 | -0.21 |
| 5.13  | -1.00 | 0.85  | 0.47  | -0.96 | -1.09 | -0.82 |
| -0.17 | -0.77 | -0.24 | -0.34 | -0.67 | -0.63 | -0.73 |
| 0.11  | -0.90 | -0.01 | 0.28  | 0.92  | 0.63  | -0.49 |
| -1.28 | -0.43 | -0.31 | -0.39 | -1.84 | -1.36 | -0.23 |
| 0.05  | -0.25 | 0.02  | -0.40 | 0.47  | 0.56  | -0.45 |
| 2.62  | -0.60 | -0.26 | -0.34 | -0.13 | 0.93  | -0.60 |
| 3.69  | -0.99 | -0.27 | -1.32 | -0.71 | 0.30  | -0.48 |
| -0.11 | 2.80  | 0.17  | 1.33  | 2.33  | 0.19  | -0.82 |



|       |       |       |       |       |       |       |
|-------|-------|-------|-------|-------|-------|-------|
| 0.80  | 1.46  | -0.28 | 1.98  | 2.48  | -0.16 | -0.33 |
| -0.82 | -0.38 | -0.31 | 1.68  | 1.12  | -1.42 | 0.26  |
| 0.08  | -0.89 | -0.24 | 0.21  | 0.81  | 0.91  | -0.18 |
| -1.03 | 0.01  | -0.22 | -0.99 | 1.16  | -0.04 | 0.13  |
| 0.12  | 1.27  | 7.00  | -0.29 | 2.75  | 0.21  | -0.69 |
| -0.27 | 2.29  | 9.36  | -0.40 | 0.03  | -1.29 | -0.97 |
| -0.05 | 0.03  | -0.28 | 0.59  | 1.59  | -0.94 | 0.46  |
| 0.26  | 1.07  | -0.25 | 0.09  | 2.45  | 0.30  | -0.61 |
| -0.43 | -0.17 | -0.26 | 0.21  | -0.01 | 0.25  | -0.35 |
| 2.31  | 0.79  | -0.08 | -0.41 | 0.77  | 0.16  | -0.91 |
| 0.20  | -0.66 | -0.30 | 0.42  | 0.39  | 0.31  | 0.16  |
| 1.71  | 0.03  | 0.32  | -1.21 | 2.24  | -0.19 | -0.63 |
| 0.67  | -0.46 | -0.28 | -1.52 | -0.87 | 0.38  | -0.53 |
| -0.19 | 1.95  | -0.28 | -0.48 | 1.01  | -0.30 | -0.11 |
| -0.01 | 0.30  | -0.26 | -0.23 | -0.12 | -0.89 | -0.24 |
| -1.20 | 0.51  | -0.04 | -0.39 | -0.95 | 0.16  | -0.77 |

|      |      |      |      |      |      |      |
|------|------|------|------|------|------|------|
| 0    | 1    | -2   | 1    | 1    | 1    | 1    |
| 0.00 | 0.00 | 0.00 | 0.00 | 0.00 | 0.00 | 0.00 |
| 1.00 | 1.00 | 1.00 | 1.00 | 1.00 | 1.00 | 1.00 |
| 0.07 | 0.27 | 0.86 | 0.15 | 0.30 | 0.59 | 0.18 |

| 54            | 55           | 56          | 57           | 58           | 59             | 60          |
|---------------|--------------|-------------|--------------|--------------|----------------|-------------|
| CTTTCAGTCGGAT | CAACACCAGTCG | TACAGTACTGT | (AATGACACGAT | AACATTCAACCT | (TTAATGCTAATCC | TCCTTGAGACC |
| miR-30e-3p    | miR-21-3p    | miR-101-3p  | miR-425-5p   | miR-181c-5p  | miR-155-5p     | miR-125a-5p |
| 138740        | 137573       | 134502      | 127210       | 125038       | 122415         | 115160      |
| -0.84         | 0.08         | -0.13       | -0.26        | -0.50        | 1.04           | -0.59       |
| -0.78         | -1.38        | -0.38       | 0.03         | -1.47        | 0.07           | 2.00        |
| 0.98          | -0.98        | -0.16       | 1.92         | -0.55        | -0.49          | -0.45       |
| -0.11         | -0.29        | -0.22       | -0.63        | -0.98        | -0.60          | -0.58       |
| -0.71         | -1.36        | -0.32       | 2.63         | 0.26         | 2.92           | 2.75        |
| -0.26         | 0.30         | -0.29       | -0.62        | -0.88        | 1.53           | -0.48       |
| -0.23         | 0.40         | -0.22       | -1.13        | -0.27        | 0.89           | -0.33       |
| -0.11         | -1.03        | -0.32       | -0.89        | 0.06         | -1.16          | -0.47       |
| -0.63         | -0.83        | -0.34       | 0.01         | -1.04        | -1.52          | -0.55       |
| -0.81         | -0.82        | -0.23       | -0.20        | -1.47        | -0.63          | -0.75       |
| 1.28          | 0.16         | -0.21       | 0.29         | 0.04         | -0.39          | 0.22        |
| 0.01          | -0.39        | -0.33       | -1.51        | 0.05         | 0.37           | 0.34        |
| 1.70          | 0.73         | 0.81        | 0.92         | 2.83         | 0.30           | -0.47       |
| -0.45         | -0.89        | -0.34       | -1.00        | -0.52        | -0.73          | -0.28       |
| 0.33          | 0.25         | -0.24       | 1.11         | -0.10        | -0.20          | -0.34       |
| 0.87          | 0.74         | -0.03       | 1.17         | 1.24         | 0.31           | -0.55       |
| -0.73         | 2.00         | -0.32       | 0.70         | 0.00         | -0.36          | -0.09       |
| -0.44         | -0.26        | 0.04        | 0.16         | 0.46         | -0.07          | -0.66       |
| 3.16          | 0.37         | -0.23       | -0.43        | 0.62         | 0.33           | -0.70       |
| 1.62          | 1.61         | 4.85        | 0.05         | 1.60         | -0.63          | -0.73       |
| -0.02         | -0.83        | -0.19       | -1.06        | -1.20        | 0.53           | -0.59       |
| -0.26         | 0.55         | -0.32       | -1.06        | 1.50         | -0.54          | 0.63        |
| -0.44         | 0.90         | -0.25       | -0.72        | 0.66         | -0.13          | 0.11        |
| -1.03         | 0.46         | -0.25       | -1.10        | -0.36        | -0.04          | -0.42       |
| -1.02         | -1.37        | -0.34       | 0.54         | -0.69        | -1.33          | 2.90        |
| -0.81         | -0.46        | -0.32       | 0.82         | 0.64         | 1.75           | 0.52        |
| -0.28         | 2.35         | 0.27        | 0.23         | 0.09         | -1.24          | -0.43       |
| 1.10          | 0.80         | 6.29        | 0.53         | -0.39        | -1.08          | -0.82       |

|       |       |       |       |       |       |       |
|-------|-------|-------|-------|-------|-------|-------|
| 5.47  | 1.52  | -0.05 | -0.31 | -0.81 | -0.07 | -0.10 |
| 2.51  | -1.07 | -0.23 | -1.03 | -1.31 | -0.17 | -0.31 |
| -0.58 | -1.37 | -0.33 | -0.97 | -1.85 | -1.06 | 0.66  |
| 3.78  | -1.37 | -0.07 | -0.42 | -1.36 | -0.69 | -0.23 |
| -0.43 | -1.34 | -0.33 | 4.83  | 0.51  | -0.93 | 10.28 |
| 0.68  | 1.20  | -0.30 | 0.16  | 3.03  | -0.74 | -0.91 |
| -0.35 | -0.49 | -0.26 | 1.49  | 0.77  | -0.75 | -0.87 |
| 0.15  | -0.04 | -0.29 | -0.51 | 0.44  | 1.14  | -0.64 |
| -1.32 | -1.18 | -0.36 | -1.51 | -1.63 | -1.83 | -0.76 |
| 1.26  | 0.41  | 0.13  | -0.80 | 0.01  | 0.87  | -0.83 |
| 0.81  | -0.19 | 1.06  | 1.79  | 1.78  | 1.45  | -0.78 |
| 0.56  | -0.31 | -0.31 | -0.28 | 1.51  | 0.70  | -0.11 |
| -1.32 | 3.05  | -0.23 | 0.22  | -1.56 | -1.51 | -0.27 |
| -1.18 | 5.66  | -0.17 | 3.05  | -1.01 | -1.30 | 0.65  |
| -0.63 | 0.15  | -0.31 | 0.14  | -0.49 | -0.60 | 0.22  |
| 1.23  | 1.96  | 0.25  | 1.17  | 0.39  | 0.06  | -0.25 |
| 0.95  | -0.83 | -0.35 | -0.77 | -0.49 | -0.16 | -0.08 |
| -1.41 | 2.24  | -0.31 | -0.98 | -1.50 | -1.45 | -0.47 |
| 1.22  | 1.52  | -0.21 | 1.83  | 3.44  | -0.04 | -0.11 |
| 0.38  | 1.39  | -0.26 | -0.49 | 2.39  | -0.34 | -0.62 |
| -0.62 | -0.50 | -0.16 | 0.75  | 0.87  | -1.19 | -0.18 |
| -0.45 | 1.24  | -0.26 | 0.57  | 2.72  | 0.94  | -0.55 |
| -0.57 | -0.07 | -0.14 | 0.13  | 0.56  | 0.05  | -0.51 |
| -0.40 | 0.61  | -0.30 | -0.04 | -0.70 | 0.79  | 0.23  |
| -0.87 | -0.17 | -0.30 | -0.40 | -1.22 | -1.17 | -0.23 |
| -0.12 | -0.09 | -0.24 | 1.67  | 0.24  | 1.04  | 0.10  |
| 0.10  | -0.39 | -0.30 | -0.86 | -0.80 | -0.22 | -0.59 |
| -0.37 | 0.16  | -0.32 | 0.15  | -0.76 | -0.44 | 0.94  |
| -0.61 | -0.39 | -0.25 | -0.17 | -1.17 | 0.04  | 0.19  |
| -0.72 | 1.09  | 8.65  | 0.07  | 0.93  | 0.09  | -0.78 |
| -0.64 | -1.19 | -0.33 | 0.25  | 0.55  | 1.22  | 0.28  |
| -0.56 | -1.32 | -0.25 | 1.94  | 1.93  | 2.41  | 0.93  |
| -1.07 | -1.36 | -0.31 | 2.73  | 0.98  | 1.71  | 1.15  |
| -0.60 | 0.74  | 5.85  | 0.27  | -0.32 | -1.37 | -0.85 |
| -1.10 | -0.17 | -0.27 | 0.01  | -0.55 | -0.63 | 0.08  |
| -1.16 | 1.03  | -0.27 | -0.09 | -1.02 | -0.43 | -0.08 |
| -0.93 | 1.13  | -0.24 | 0.87  | -0.54 | -0.98 | -0.75 |
| 5.98  | -0.44 | 0.58  | -1.72 | -0.60 | -0.21 | -0.53 |
| -0.63 | -0.44 | 0.08  | 0.94  | -1.08 | -0.92 | -0.90 |
| 1.81  | -1.38 | -0.23 | 0.10  | -1.28 | 1.08  | 1.04  |
| -0.39 | -1.36 | -0.31 | 0.88  | -0.73 | 0.26  | -0.07 |
| 2.28  | -1.30 | -0.20 | 1.67  | 1.85  | 1.59  | 0.14  |
| 0.65  | -0.49 | -0.19 | -1.09 | -0.67 | -0.31 | -0.21 |
| 5.13  | -1.00 | 0.85  | 0.47  | -0.96 | -1.09 | -0.82 |
| -0.17 | -0.77 | -0.24 | -0.34 | -0.67 | -0.63 | -0.73 |
| 0.11  | -0.90 | -0.01 | 0.28  | 0.92  | 0.63  | -0.49 |
| -1.28 | -0.43 | -0.31 | -0.39 | -1.84 | -1.36 | -0.23 |
| 0.05  | -0.25 | 0.02  | -0.40 | 0.47  | 0.56  | -0.45 |
| 2.62  | -0.60 | -0.26 | -0.34 | -0.13 | 0.93  | -0.60 |
| 3.69  | -0.99 | -0.27 | -1.32 | -0.71 | 0.30  | -0.48 |
| -0.11 | 2.80  | 0.17  | 1.33  | 2.33  | 0.19  | -0.82 |
| 0.80  | 1.46  | -0.28 | 1.98  | 2.48  | -0.16 | -0.33 |
| -0.82 | -0.38 | -0.31 | 1.68  | 1.12  | -1.42 | 0.26  |
| 0.08  | -0.89 | -0.24 | 0.21  | 0.81  | 0.91  | -0.18 |
| -1.03 | 0.01  | -0.22 | -0.99 | 1.16  | -0.04 | 0.13  |
| 0.12  | 1.27  | 7.00  | -0.29 | 2.75  | 0.21  | -0.69 |
| -0.27 | 2.29  | 9.36  | -0.40 | 0.03  | -1.29 | -0.97 |
| -0.05 | 0.03  | -0.28 | 0.59  | 1.59  | -0.94 | 0.46  |
| 0.26  | 1.07  | -0.25 | 0.09  | 2.45  | 0.30  | -0.61 |

|       |       |       |       |       |       |       |
|-------|-------|-------|-------|-------|-------|-------|
| -0.43 | -0.17 | -0.26 | 0.21  | -0.01 | 0.25  | -0.35 |
| 2.31  | 0.79  | -0.08 | -0.41 | 0.77  | 0.16  | -0.91 |
| 0.20  | -0.66 | -0.30 | 0.42  | 0.39  | 0.31  | 0.16  |
| 1.71  | 0.03  | 0.32  | -1.21 | 2.24  | -0.19 | -0.63 |
| 0.67  | -0.46 | -0.28 | -1.52 | -0.87 | 0.38  | -0.53 |
| -0.19 | 1.95  | -0.28 | -0.48 | 1.01  | -0.30 | -0.11 |
| -0.01 | 0.30  | -0.26 | -0.23 | -0.12 | -0.89 | -0.24 |
| -1    | 1     | 0     | 0     | -1    | 0     | -1    |

---

| 54            | 55            | 56          | 57          | 58            | 59           | 60         |
|---------------|---------------|-------------|-------------|---------------|--------------|------------|
| 63            | 42            | 129         | 43          | 47            | 106          | 117        |
| CATTATTACTTTT | AACATTCATTGCT | ACTCCAGCCCC | TCAGGCTCAGT | (TTCACAGTGGCT | TACCCATTGCAT | TGTAACATCC |
| miR-126-5p    | miR-181b-5p   | miR-766-3p  | miR-484     | miR-27b-3p    | miR-660-5p   | miR-30a-5p |
| 96743         | 270366        | 12195.00    | 261666      | 209441        | 23949        | 16585      |
| -0.60         | -0.55         | -0.44       | 0.57        | -0.04         | -0.51        | 0.81       |
| -0.11         | -1.07         | 0.51        | 1.61        | -1.33         | -0.07        | -2.04      |
| -0.29         | -1.03         | -0.56       | 0.17        | -0.14         | 0.33         | -0.73      |
| -0.52         | -1.07         | -0.77       | -0.40       | -0.64         | 0.13         | -1.10      |
| -0.31         | 0.47          | 1.23        | 3.70        | -0.53         | -0.56        | -1.73      |
| -0.50         | 0.32          | -1.00       | -0.57       | 0.59          | -0.70        | -0.61      |
| -0.60         | 0.88          | -0.48       | -0.28       | -0.01         | -0.55        | 0.33       |
| -0.56         | 0.03          | 0.13        | -0.23       | -1.03         | -0.65        | -0.27      |
| -0.40         | -1.58         | -0.24       | -0.29       | -0.88         | -0.56        | -0.07      |
| 0.18          | -1.31         | -0.47       | -0.04       | -0.82         | -0.50        | -1.41      |
| 1.28          | -0.92         | 0.12        | 0.18        | 1.17          | -0.19        | 0.21       |
| -0.60         | 2.09          | -1.03       | -1.14       | -1.04         | -0.64        | -0.32      |
| 1.97          | -0.13         | -0.56       | -0.87       | 0.87          | 2.94         | 1.06       |
| -0.59         | 0.77          | 0.98        | 0.19        | -0.98         | -0.77        | 1.66       |
| -0.28         | -0.70         | -0.19       | -0.05       | -0.30         | 0.19         | 0.53       |
| 1.18          | 0.40          | -0.13       | -0.80       | 3.48          | 0.72         | 0.27       |
| -0.62         | 1.79          | 0.31        | 0.64        | 0.32          | -0.53        | 1.58       |
| -0.25         | -0.59         | -0.31       | -0.58       | -0.39         | 2.16         | 0.35       |
| -0.25         | 0.68          | 0.04        | -1.06       | 0.07          | 0.36         | 0.95       |
| 2.98          | -0.57         | -0.39       | -0.23       | 0.04          | 1.97         | 1.77       |
| -0.48         | 0.22          | -0.70       | -0.77       | -0.21         | -0.61        | -0.79      |
| -0.68         | 0.75          | 0.33        | -0.23       | 0.26          | -0.79        | 0.19       |
| -0.64         | 0.69          | 0.37        | -0.32       | -0.05         | -0.51        | 0.65       |
| -0.67         | 1.22          | 0.36        | 0.12        | -0.47         | -0.73        | -0.93      |
| -0.39         | -0.65         | 4.15        | 1.60        | -0.49         | -0.67        | -0.83      |
| -0.49         | 1.18          | -0.58       | -0.13       | 1.62          | -0.57        | 0.02       |
| 2.24          | -1.33         | -0.70       | -0.78       | 0.93          | 1.32         | 0.47       |
| 19.45         | -1.59         | -0.69       | -1.00       | 1.01          | 5.07         | 5.68       |
| 0.31          | -1.15         | 0.10        | -0.40       | 0.88          | 0.23         | -0.22      |
| -0.05         | -1.50         | 0.29        | -0.48       | -0.33         | 0.16         | -0.89      |
| -0.50         | -1.58         | 2.23        | 2.88        | -0.97         | -0.39        | -0.17      |
| 2.09          | -1.12         | 2.03        | -0.38       | 0.89          | 2.14         | 2.08       |
| 0.71          | -1.61         | 1.16        | 3.19        | -0.37         | -0.03        | -1.44      |
| -0.59         | -0.80         | -0.13       | 0.82        | -0.71         | -0.37        | -0.52      |
| -0.38         | -0.59         | 0.09        | 0.58        | -0.96         | -0.12        | -0.26      |
| -0.50         | 0.68          | -0.02       | -0.07       | -0.31         | -0.66        | -0.37      |
| -0.65         | -1.28         | -1.01       | -1.19       | -1.36         | -0.93        | -1.11      |
| -0.22         | 0.01          | -0.92       | -1.73       | -0.49         | -0.16        | 0.33       |
| 2.40          | -0.08         | -0.34       | -1.21       | 1.20          | 4.48         | 3.52       |

|       |       |       |       |       |       |       |
|-------|-------|-------|-------|-------|-------|-------|
| -0.54 | 1.90  | -0.46 | -0.78 | -0.38 | -0.50 | 1.24  |
| -0.70 | 2.31  | 3.48  | 3.64  | 0.63  | -0.63 | -1.11 |
| -0.51 | 3.41  | 14.49 | 2.87  | 7.95  | -0.24 | 0.29  |
| -0.32 | 0.12  | 0.41  | 0.24  | 0.87  | -0.75 | 0.15  |
| 0.13  | -0.18 | -0.39 | -0.33 | 0.98  | 0.45  | 2.85  |
| -0.52 | 0.44  | 0.52  | -1.21 | -0.88 | -0.54 | -1.20 |
| -0.61 | 1.67  | 1.69  | 2.06  | -0.30 | -0.90 | -1.25 |
| -0.19 | -0.16 | 0.12  | 0.89  | 1.61  | -0.31 | 0.94  |
| -0.63 | 0.50  | -0.18 | 0.03  | 0.33  | -0.59 | 0.20  |
| -0.20 | -0.56 | -0.38 | 0.52  | -0.30 | -0.29 | -0.05 |
| -0.62 | 1.05  | -0.40 | 0.45  | -0.21 | -0.50 | -0.17 |
| -0.07 | 0.83  | -0.08 | -0.24 | 1.15  | -0.18 | 0.93  |
| -0.54 | -0.56 | 1.62  | 0.83  | 2.06  | -0.73 | -1.08 |
| -0.54 | -1.15 | 0.85  | 0.84  | 0.84  | -0.72 | -0.87 |
| -0.54 | -0.45 | -0.05 | 0.70  | 1.46  | -0.50 | -0.47 |
| -0.60 | 0.08  | -0.60 | -0.62 | 0.23  | -0.72 | -0.85 |
| -0.52 | -0.46 | 0.04  | 1.00  | 0.29  | -0.70 | -1.08 |
| -0.24 | -0.81 | -0.67 | -0.20 | 0.66  | -0.52 | -0.66 |
| 11.46 | 0.05  | -1.00 | -1.47 | 0.78  | 5.80  | 4.39  |
| -0.61 | 1.69  | -0.38 | -0.03 | -0.35 | -0.52 | -0.74 |
| -0.29 | 1.93  | -0.54 | 0.38  | 0.99  | 0.00  | -0.13 |
| -0.36 | 1.39  | -0.73 | 0.84  | 0.07  | 0.01  | -0.97 |
| 8.89  | -1.11 | -1.04 | -1.29 | 0.38  | 4.37  | -0.13 |
| -0.51 | -0.18 | -0.61 | 0.36  | -0.11 | -0.47 | -1.21 |
| -0.52 | -0.23 | -0.92 | -0.49 | 0.84  | -0.52 | -0.82 |
| -0.07 | -0.73 | -0.98 | -0.17 | 0.13  | 0.22  | 4.46  |
| -0.57 | 2.04  | -0.65 | -0.99 | -1.11 | 4.09  | 4.44  |
| 2.04  | -1.60 | -0.65 | -0.77 | 0.16  | 2.19  | -0.61 |
| 0.13  | -1.70 | 0.99  | 0.51  | -0.86 | 0.08  | 0.30  |
| -0.42 | 0.20  | 1.32  | 3.77  | -0.21 | 0.48  | 0.11  |
| -0.17 | 0.98  | 0.81  | 2.80  | 0.68  | 0.67  | 1.46  |
| -0.51 | -0.83 | -0.27 | -0.01 | -0.30 | -0.19 | -0.71 |
| -0.07 | -0.94 | -1.10 | -0.67 | -1.05 | -0.59 | -0.12 |
| -0.15 | -0.99 | -0.80 | -0.85 | -0.61 | -0.13 | -1.13 |
| 0.17  | 0.23  | -0.57 | -0.73 | -0.71 | 0.92  | -0.20 |
| -0.60 | 3.15  | 17.98 | 7.94  | -0.38 | -0.82 | -1.56 |
| -0.02 | 0.54  | -0.82 | -1.14 | 0.14  | 0.49  | 1.81  |
| -0.23 | -0.52 | 0.05  | -1.35 | -0.43 | 0.14  | 0.29  |
| 0.18  | 0.94  | -0.89 | -1.76 | -0.28 | -0.40 | -1.39 |
| 0.75  | -0.28 | 0.30  | 1.72  | 1.39  | 1.57  | 0.79  |
| 0.03  | -0.65 | 0.21  | 0.68  | 2.31  | -0.09 | 1.89  |
| -0.42 | -0.85 | 1.56  | 2.17  | 0.70  | -0.66 | 2.55  |
| -0.32 | -0.32 | -0.03 | 0.81  | 0.94  | -0.36 | -0.70 |
| -0.64 | 0.76  | -0.54 | 0.28  | -0.19 | -0.73 | 0.51  |
| 4.01  | 0.11  | -0.71 | -0.14 | 0.45  | 3.40  | 0.62  |
| 6.09  | -1.13 | -0.90 | -1.27 | -0.13 | 4.13  | -0.14 |
| -0.51 | -0.32 | 0.16  | 1.37  | 0.38  | -0.32 | 1.18  |
| -0.48 | 0.13  | -0.23 | 0.08  | 0.80  | -0.38 | 0.13  |
| -0.50 | -0.35 | -0.50 | 0.35  | 0.25  | -0.54 | -0.27 |
| -0.18 | -0.05 | -0.55 | -1.26 | 0.29  | 1.17  | -0.47 |
| -0.48 | -0.26 | 0.30  | 0.86  | 0.74  | -0.52 | 1.35  |
| -0.21 | 0.02  | -0.68 | -1.51 | -0.02 | 1.63  | 5.62  |
| -0.58 | -0.10 | -0.31 | -1.07 | -0.32 | -0.53 | -0.82 |
| -0.63 | 1.75  | 0.32  | -0.18 | 0.49  | -0.63 | -0.77 |
| -0.09 | -0.88 | -0.28 | -1.18 | 1.91  | -0.15 | 4.11  |
| 0.29  | -0.12 | -0.61 | -0.62 | 3.44  | -0.23 | -0.74 |
| 0.21  | 0.21  | 0.22  | 0.24  | 0.24  | 0.25  | 0.26  |
| 0.22  | 0.15  | 1.00  | 0.17  | 0.15  | 0.50  | 0.33  |













































































































































































|         |        |          |         |         |         |         |
|---------|--------|----------|---------|---------|---------|---------|
| 555209  | 358914 | 3926455  | 1257195 | 488065  | 1421920 | 492624  |
| 64      | 65     | 66       | 67      | 68      | 69      | 70      |
| 34      | 35     | 36       | 37      | 38      | 39      | 1       |
| G_31    | G_32   | G_4      | G_5     | G_6     | G_7     | A_10    |
| CHR_NP  | CHR_NP | CHR_NP   | CHR_NP  | CHR_NP  | CHR_NP  | CHR_P   |
| 1166964 | 863736 | 11268615 | 6409791 | 1457364 | 6651247 | 3902181 |
| 0.71    | 0.28   | 0.55     | 0.76    | 0.94    | 0.73    | 0.12    |
| G_31    | G_32   | G_4      | G_5     | G_6     | G_7     | A_10    |
| 611755  | 504822 | 7342160  | 5152596 | 969299  | 5229327 | 3409557 |
| 60054   | 27156  | 715360   | 584807  | 196834  | 399578  | 190797  |
| 81885   | 50732  | 166580   | 98444   | 33091   | 131009  | 7668    |
| 43191   | 49624  | 78461    | 70682   | 30921   | 36819   | 10054   |
| 63556   | 41067  | 197923   | 106696  | 48784   | 152679  | 37879   |
| 57366   | 33951  | 151060   | 106970  | 30262   | 81663   | 47947   |
| 24074   | 19272  | 669358   | 14568   | 10574   | 100931  | 5499    |
| 48602   | 33276  | 252380   | 37877   | 29185   | 86225   | 4865    |
| 3955    | 3195   | 304888   | 3580    | 1738    | 15269   | 4480    |
| 10556   | 3738   | 214919   | 10351   | 8204    | 87617   | 5810    |
| 10050   | 4479   | 125897   | 19095   | 7982    | 44347   | 28115   |
| 8857    | 2892   | 58207    | 8865    | 9832    | 27797   | 31440   |
| 12921   | 6828   | 42738    | 20501   | 6971    | 19045   | 8308    |
| 14640   | 9224   | 80893    | 8750    | 7614    | 28174   | 9824    |
| 7451    | 4023   | 33867    | 26210   | 7585    | 22198   | 7741    |
| 6652    | 3420   | 83123    | 1659    | 1801    | 11236   | 11411   |
| 1400    | 588    | 7967     | 7460    | 3840    | 4218    | 5821    |
| 6284    | 4297   | 65216    | 2153    | 932     | 9345    | 1238    |
| 4796    | 2853   | 18322    | 2596    | 1264    | 4671    | 5981    |
| 5219    | 3205   | 69159    | 4040    | 2901    | 11037   | 1600    |
| 5029    | 2619   | 17863    | 4956    | 2305    | 6613    | 3207    |
| 2626    | 1310   | 9992     | 3862    | 1506    | 4148    | 2184    |
| 2776    | 1160   | 22460    | 5937    | 2124    | 7540    | 5042    |
| 1742    | 613    | 21293    | 3969    | 1093    | 4874    | 1341    |
| 5429    | 4673   | 17203    | 3609    | 655     | 4418    | 858     |
| 2457    | 2791   | 25787    | 1081    | 999     | 10956   | 1605    |
| 704     | 418    | 7579     | 3527    | 997     | 4583    | 1511    |
| 3489    | 2027   | 9094     | 7577    | 1962    | 5290    | 5431    |
| 1307    | 1126   | 41338    | 2796    | 1329    | 1938    | 6034    |
| 2292    | 1628   | 13657    | 2219    | 1244    | 5804    | 1572    |
| 2173    | 827    | 8205     | 4514    | 1864    | 4373    | 1013    |
| 4003    | 2313   | 11523    | 2645    | 1624    | 4144    | 838     |
| 2719    | 1774   | 11574    | 6496    | 2848    | 6975    | 2236    |
| 1704    | 969    | 38405    | 1508    | 789     | 3611    | 544     |
| 1210    | 558    | 25718    | 253     | 342     | 591     | 715     |
| 2158    | 1509   | 12423    | 2036    | 1134    | 5192    | 1112    |
| 2703    | 3005   | 9914     | 6992    | 1422    | 4545    | 796     |
| 2524    | 1494   | 11445    | 1205    | 686     | 4225    | 1073    |
| 1408    | 2015   | 6517     | 1049    | 942     | 4989    | 1075    |
| 2049    | 920    | 4721     | 4100    | 1021    | 1788    | 178     |
| 974     | 466    | 7388     | 6950    | 2366    | 3556    | 2757    |
| 1538    | 1136   | 1409     | 1880    | 348     | 817     | 563     |
| 2218    | 1235   | 3723     | 2467    | 928     | 1980    | 2074    |
| 1232    | 915    | 3808     | 2879    | 794     | 2672    | 607     |
| 563     | 382    | 30204    | 243     | 210     | 1372    | 613     |
| 868     | 896    | 2494     | 1098    | 514     | 1473    | 974     |

|      |     |       |      |     |      |      |
|------|-----|-------|------|-----|------|------|
| 1477 | 605 | 2644  | 1214 | 731 | 1358 | 637  |
| 1093 | 458 | 5914  | 1492 | 937 | 1954 | 201  |
| 842  | 276 | 3222  | 2347 | 687 | 1241 | 1701 |
| 187  | 88  | 21157 | 350  | 187 | 702  | 277  |
| 184  | 51  | 8480  | 243  | 124 | 447  | 1549 |
| 228  | 186 | 444   | 406  | 477 | 270  | 91   |
| 1067 | 777 | 1933  | 385  | 203 | 826  | 167  |
| 856  | 476 | 1923  | 1624 | 394 | 1111 | 255  |
| 310  | 95  | 2091  | 325  | 107 | 509  | 2169 |
| 18   | 4   | 4507  | 859  | 663 | 2020 | 258  |
| 55   | 19  | 17962 | 108  | 42  | 155  | 358  |
| 872  | 667 | 3703  | 1109 | 409 | 1731 | 103  |
| 791  | 386 | 2376  | 683  | 179 | 781  | 256  |
| 1052 | 576 | 1430  | 869  | 378 | 776  | 421  |
| 1276 | 911 | 1024  | 1720 | 576 | 556  | 317  |
| 977  | 534 | 1021  | 605  | 295 | 481  | 231  |
| 399  | 172 | 1929  | 663  | 176 | 567  | 569  |
| 94   | 50  | 14472 | 107  | 40  | 372  | 31   |
| 39   | 55  | 9973  | 52   | 14  | 80   | 5    |
| 368  | 143 | 1498  | 1372 | 498 | 875  | 1075 |
| 447  | 361 | 5759  | 343  | 222 | 1097 | 173  |
| 352  | 185 | 4518  | 217  | 167 | 346  | 118  |
| 249  | 220 | 7899  | 207  | 107 | 752  | 287  |
| 255  | 301 | 731   | 172  | 70  | 433  | 155  |
| 98   | 77  | 2021  | 730  | 208 | 634  | 130  |
| 474  | 288 | 343   | 551  | 275 | 313  | 86   |
| 130  | 80  | 483   | 436  | 156 | 327  | 426  |
| 223  | 122 | 5449  | 73   | 98  | 531  | 270  |
| 108  | 47  | 2458  | 498  | 175 | 827  | 407  |
| 669  | 604 | 2152  | 311  | 196 | 495  | 60   |
| 143  | 469 | 1176  | 209  | 225 | 116  | 206  |
| 36   | 21  | 1775  | 853  | 373 | 1134 | 187  |
| 213  | 217 | 1197  | 1260 | 417 | 650  | 41   |
| 428  | 234 | 653   | 605  | 252 | 356  | 432  |
| 341  | 219 | 299   | 147  | 80  | 141  | 23   |
| 216  | 144 | 1996  | 315  | 122 | 698  | 120  |
| 55   | 20  | 436   | 401  | 108 | 173  | 352  |
| 283  | 141 | 790   | 627  | 218 | 310  | 57   |
| 197  | 37  | 1224  | 50   | 61  | 54   | 45   |
| 238  | 113 | 1906  | 299  | 101 | 502  | 63   |
| 80   | 50  | 339   | 258  | 75  | 150  | 92   |
| 253  | 151 | 470   | 427  | 160 | 189  | 70   |
| 191  | 152 | 3382  | 92   | 44  | 574  | 148  |
| 323  | 199 | 855   | 176  | 78  | 328  | 71   |
| 292  | 173 | 403   | 334  | 171 | 260  | 183  |
| 128  | 66  | 613   | 346  | 78  | 253  | 282  |
| 7    | 7   | 5354  | 54   | 10  | 41   | 6    |
| 68   | 37  | 351   | 200  | 99  | 174  | 89   |
| 135  | 87  | 1133  | 106  | 67  | 331  | 40   |
| 36   | 29  | 2426  | 37   | 25  | 121  | 36   |
| 190  | 154 | 674   | 44   | 31  | 121  | 90   |
| 220  | 93  | 200   | 187  | 102 | 123  | 92   |
| 157  | 50  | 353   | 290  | 95  | 138  | 241  |
| 221  | 162 | 244   | 250  | 115 | 210  | 120  |
| 84   | 47  | 3797  | 30   | 22  | 199  | 19   |
| 69   | 67  | 250   | 153  | 32  | 99   | 36   |
| 171  | 62  | 833   | 205  | 89  | 352  | 8    |
| 220  | 153 | 318   | 212  | 170 | 165  | 85   |
| 142  | 169 | 1119  | 143  | 80  | 228  | 108  |

|     |     |      |     |     |     |     |
|-----|-----|------|-----|-----|-----|-----|
| 103 | 39  | 1575 | 41  | 45  | 225 | 27  |
| 57  | 37  | 2189 | 69  | 24  | 185 | 268 |
| 137 | 80  | 153  | 106 | 58  | 71  | 18  |
| 208 | 190 | 385  | 142 | 45  | 201 | 12  |
| 112 | 77  | 1598 | 66  | 43  | 182 | 31  |
| 99  | 81  | 2438 | 85  | 65  | 341 | 80  |
| 141 | 75  | 574  | 33  | 29  | 154 | 126 |
| 90  | 68  | 236  | 132 | 51  | 102 | 98  |
| 131 | 94  | 236  | 268 | 40  | 98  | 46  |
| 65  | 43  | 2178 | 73  | 38  | 314 | 42  |
| 127 | 75  | 450  | 106 | 62  | 64  | 21  |
| 142 | 64  | 222  | 95  | 76  | 195 | 101 |
| 50  | 18  | 351  | 51  | 29  | 452 | 154 |
| 153 | 105 | 633  | 39  | 55  | 104 | 29  |
| 153 | 105 | 633  | 39  | 55  | 104 | 29  |
| 107 | 120 | 125  | 81  | 45  | 87  | 37  |
| 37  | 10  | 173  | 170 | 35  | 136 | 49  |
| 23  | 16  | 44   | 70  | 18  | 66  | 95  |
| 10  | 19  | 742  | 17  | 42  | 32  | 22  |
| 50  | 22  | 270  | 55  | 15  | 69  | 101 |
| 11  | 6   | 2055 | 17  | 9   | 19  | 1   |
| 111 | 54  | 162  | 87  | 66  | 62  | 19  |
| 58  | 51  | 174  | 118 | 51  | 124 | 6   |
| 35  | 12  | 116  | 49  | 34  | 39  | 30  |
| 29  | 13  | 38   | 61  | 10  | 22  | 22  |
| 134 | 68  | 65   | 72  | 29  | 88  | 65  |
| 2   | 0   | 753  | 547 | 137 | 304 | 3   |
| 101 | 49  | 165  | 79  | 42  | 51  | 78  |
| 74  | 29  | 336  | 48  | 25  | 86  | 23  |
| 32  | 27  | 79   | 73  | 8   | 30  | 11  |
| 19  | 6   | 555  | 36  | 25  | 67  | 16  |
| 53  | 26  | 152  | 46  | 13  | 61  | 54  |
| 11  | 3   | 320  | 62  | 26  | 161 | 126 |
| 18  | 14  | 257  | 60  | 25  | 65  | 31  |
| 35  | 31  | 392  | 47  | 27  | 68  | 21  |
| 26  | 40  | 76   | 86  | 26  | 86  | 13  |
| 13  | 9   | 161  | 94  | 38  | 97  | 50  |
| 32  | 23  | 129  | 69  | 23  | 58  | 11  |
| 32  | 24  | 108  | 96  | 32  | 46  | 122 |
| 82  | 56  | 223  | 69  | 46  | 60  | 21  |
| 14  | 7   | 1503 | 8   | 4   | 23  | 1   |
| 22  | 19  | 225  | 103 | 50  | 73  | 18  |
| 51  | 27  | 46   | 66  | 22  | 38  | 23  |
| 79  | 46  | 239  | 42  | 28  | 76  | 10  |
| 41  | 31  | 260  | 128 | 40  | 104 | 23  |
| 32  | 45  | 118  | 116 | 22  | 56  | 17  |
| 26  | 28  | 337  | 26  | 13  | 39  | 37  |
| 24  | 25  | 619  | 36  | 23  | 117 | 27  |
| 2   | 4   | 138  | 5   | 10  | 9   | 44  |
| 50  | 18  | 105  | 94  | 19  | 43  | 15  |
| 35  | 4   | 186  | 44  | 20  | 15  | 142 |
| 24  | 30  | 79   | 84  | 27  | 56  | 8   |
| 53  | 36  | 152  | 71  | 21  | 94  | 23  |
| 17  | 41  | 39   | 41  | 9   | 10  | 13  |
| 22  | 18  | 62   | 33  | 10  | 36  | 12  |
| 4   | 2   | 119  | 110 | 25  | 107 | 44  |
| 13  | 9   | 1268 | 1   | 2   | 8   | 1   |
| 43  | 31  | 65   | 57  | 16  | 20  | 5   |
| 33  | 42  | 83   | 70  | 25  | 62  | 15  |

|    |     |     |    |    |     |    |
|----|-----|-----|----|----|-----|----|
| 15 | 10  | 300 | 19 | 9  | 16  | 11 |
| 33 | 36  | 193 | 18 | 8  | 22  | 12 |
| 18 | 6   | 99  | 69 | 41 | 47  | 30 |
| 29 | 34  | 39  | 50 | 8  | 34  | 10 |
| 16 | 16  | 15  | 33 | 64 | 25  | 6  |
| 22 | 21  | 572 | 11 | 10 | 21  | 5  |
| 9  | 3   | 144 | 45 | 13 | 33  | 45 |
| 52 | 13  | 89  | 32 | 13 | 18  | 8  |
| 15 | 7   | 189 | 19 | 24 | 65  | 61 |
| 40 | 19  | 78  | 36 | 19 | 29  | 21 |
| 26 | 13  | 148 | 26 | 4  | 39  | 13 |
| 43 | 10  | 347 | 13 | 7  | 20  | 6  |
| 54 | 31  | 45  | 49 | 19 | 30  | 16 |
| 20 | 81  | 50  | 8  | 10 | 11  | 4  |
| 45 | 22  | 117 | 17 | 13 | 42  | 16 |
| 7  | 11  | 30  | 20 | 5  | 16  | 6  |
| 7  | 56  | 45  | 9  | 21 | 8   | 1  |
| 8  | 7   | 89  | 95 | 30 | 1   | 14 |
| 20 | 13  | 451 | 13 | 10 | 41  | 11 |
| 10 | 8   | 12  | 6  | 15 | 4   | 14 |
| 36 | 22  | 338 | 16 | 10 | 52  | 11 |
| 33 | 8   | 27  | 20 | 13 | 10  | 50 |
| 18 | 15  | 64  | 54 | 20 | 27  | 27 |
| 17 | 12  | 423 | 13 | 10 | 41  | 9  |
| 1  | 5   | 6   | 2  | 4  | 4   | 14 |
| 43 | 14  | 112 | 16 | 20 | 26  | 10 |
| 13 | 12  | 138 | 38 | 14 | 46  | 6  |
| 0  | 222 | 2   | 23 | 91 | 120 | 0  |
| 23 | 24  | 217 | 1  | 2  | 28  | 10 |
| 26 | 13  | 31  | 8  | 2  | 7   | 9  |
| 53 | 15  | 38  | 55 | 23 | 29  | 29 |
| 2  | 3   | 98  | 37 | 16 | 49  | 7  |
| 51 | 39  | 100 | 40 | 27 | 68  | 4  |
| 1  | 0   | 225 | 3  | 0  | 6   | 36 |
| 14 | 7   | 183 | 40 | 17 | 59  | 27 |
| 24 | 14  | 33  | 10 | 3  | 15  | 5  |
| 8  | 7   | 130 | 10 | 23 | 30  | 4  |
| 13 | 5   | 51  | 88 | 20 | 34  | 5  |
| 10 | 7   | 61  | 9  | 32 | 75  | 29 |
| 22 | 17  | 53  | 35 | 9  | 27  | 17 |
| 9  | 5   | 26  | 20 | 9  | 14  | 12 |
| 15 | 8   | 237 | 6  | 6  | 29  | 8  |
| 3  | 1   | 15  | 16 | 24 | 6   | 4  |
| 14 | 10  | 164 | 77 | 31 | 43  | 4  |
| 17 | 12  | 66  | 40 | 9  | 22  | 11 |
| 15 | 23  | 27  | 11 | 5  | 9   | 11 |
| 9  | 6   | 77  | 49 | 10 | 39  | 61 |
| 18 | 11  | 15  | 16 | 5  | 12  | 8  |
| 17 | 14  | 32  | 35 | 6  | 17  | 1  |
| 0  | 9   | 114 | 1  | 4  | 7   | 3  |
| 13 | 8   | 36  | 38 | 12 | 19  | 20 |
| 9  | 4   | 111 | 8  | 5  | 25  | 24 |
| 28 | 13  | 63  | 21 | 12 | 21  | 2  |
| 3  | 3   | 85  | 23 | 13 | 31  | 2  |
| 14 | 2   | 94  | 16 | 7  | 30  | 13 |
| 0  | 0   | 360 | 1  | 0  | 2   | 2  |
| 8  | 17  | 77  | 28 | 4  | 49  | 1  |
| 22 | 9   | 420 | 69 | 32 | 143 | 0  |
| 7  | 3   | 63  | 39 | 10 | 20  | 4  |

|    |    |     |    |    |    |    |
|----|----|-----|----|----|----|----|
| 5  | 3  | 54  | 5  | 5  | 16 | 2  |
| 8  | 7  | 51  | 17 | 8  | 17 | 14 |
| 13 | 3  | 20  | 2  | 10 | 6  | 2  |
| 14 | 13 | 22  | 17 | 11 | 14 | 5  |
| 28 | 11 | 34  | 27 | 13 | 32 | 13 |
| 7  | 1  | 54  | 44 | 8  | 40 | 14 |
| 6  | 8  | 20  | 20 | 9  | 11 | 6  |
| 7  | 9  | 39  | 9  | 4  | 19 | 3  |
| 18 | 11 | 77  | 1  | 2  | 9  | 2  |
| 9  | 5  | 31  | 16 | 4  | 17 | 6  |
| 3  | 3  | 325 | 2  | 0  | 4  | 0  |
| 8  | 1  | 11  | 23 | 9  | 5  | 6  |
| 3  | 0  | 106 | 9  | 7  | 28 | 5  |
| 4  | 6  | 40  | 38 | 10 | 16 | 5  |
| 4  | 3  | 13  | 16 | 5  | 5  | 3  |
| 11 | 10 | 102 | 11 | 2  | 6  | 7  |
| 13 | 11 | 67  | 2  | 5  | 14 | 4  |
| 5  | 1  | 58  | 20 | 16 | 17 | 1  |
| 7  | 6  | 29  | 6  | 5  | 4  | 5  |
| 1  | 0  | 25  | 3  | 1  | 9  | 1  |
| 10 | 9  | 132 | 0  | 2  | 20 | 2  |
| 22 | 10 | 42  | 10 | 5  | 13 | 3  |
| 22 | 10 | 42  | 10 | 5  | 13 | 3  |
| 3  | 3  | 2   | 3  | 10 | 1  | 2  |
| 14 | 6  | 25  | 30 | 3  | 18 | 7  |
| 14 | 5  | 127 | 31 | 11 | 19 | 1  |
| 7  | 5  | 21  | 3  | 7  | 2  | 1  |
| 14 | 13 | 53  | 12 | 4  | 13 | 0  |
| 8  | 2  | 23  | 12 | 4  | 10 | 6  |
| 6  | 2  | 22  | 4  | 4  | 12 | 17 |
| 7  | 9  | 93  | 24 | 6  | 34 | 9  |
| 2  | 1  | 22  | 9  | 3  | 9  | 4  |
| 7  | 14 | 21  | 4  | 1  | 10 | 3  |
| 6  | 4  | 69  | 15 | 2  | 24 | 2  |
| 5  | 2  | 32  | 12 | 10 | 11 | 12 |
| 5  | 9  | 25  | 7  | 4  | 13 | 2  |
| 0  | 1  | 342 | 0  | 1  | 2  | 0  |
| 7  | 4  | 24  | 18 | 5  | 9  | 7  |
| 23 | 8  | 58  | 4  | 4  | 17 | 3  |
| 8  | 10 | 12  | 22 | 7  | 13 | 1  |
| 5  | 7  | 28  | 23 | 7  | 7  | 6  |
| 21 | 8  | 53  | 4  | 4  | 17 | 3  |
| 9  | 0  | 9   | 8  | 8  | 5  | 14 |
| 8  | 5  | 3   | 8  | 5  | 7  | 9  |
| 2  | 1  | 50  | 10 | 1  | 9  | 0  |
| 6  | 5  | 19  | 10 | 1  | 10 | 11 |
| 1  | 0  | 212 | 1  | 0  | 0  | 0  |
| 8  | 5  | 10  | 12 | 4  | 6  | 7  |
| 1  | 3  | 22  | 27 | 8  | 8  | 13 |
| 4  | 2  | 20  | 28 | 6  | 11 | 6  |
| 0  | 5  | 9   | 3  | 1  | 1  | 4  |
| 13 | 7  | 64  | 7  | 6  | 23 | 7  |
| 1  | 1  | 167 | 1  | 1  | 0  | 2  |
| 3  | 5  | 15  | 8  | 1  | 9  | 4  |
| 8  | 8  | 67  | 6  | 1  | 13 | 7  |
| 0  | 0  | 0   | 0  | 0  | 0  | 1  |
| 7  | 6  | 20  | 22 | 5  | 13 | 6  |
| 8  | 16 | 16  | 7  | 5  | 6  | 7  |
| 4  | 4  | 16  | 14 | 2  | 8  | 0  |

|    |    |     |    |    |    |    |
|----|----|-----|----|----|----|----|
| 2  | 16 | 10  | 3  | 0  | 1  | 1  |
| 5  | 1  | 16  | 5  | 3  | 11 | 6  |
| 3  | 3  | 6   | 1  | 3  | 0  | 1  |
| 4  | 3  | 17  | 7  | 0  | 13 | 2  |
| 10 | 3  | 3   | 17 | 3  | 5  | 2  |
| 7  | 1  | 3   | 9  | 7  | 8  | 2  |
| 7  | 8  | 49  | 6  | 1  | 13 | 6  |
| 0  | 2  | 5   | 4  | 2  | 1  | 2  |
| 2  | 1  | 183 | 3  | 0  | 8  | 3  |
| 6  | 5  | 100 | 4  | 0  | 2  | 0  |
| 7  | 3  | 33  | 0  | 4  | 24 | 0  |
| 7  | 2  | 6   | 9  | 7  | 4  | 1  |
| 4  | 2  | 36  | 6  | 6  | 6  | 2  |
| 4  | 0  | 4   | 5  | 3  | 1  | 27 |
| 2  | 4  | 3   | 1  | 2  | 1  | 7  |
| 13 | 4  | 29  | 1  | 1  | 7  | 3  |
| 8  | 3  | 17  | 10 | 5  | 14 | 4  |
| 3  | 1  | 23  | 4  | 5  | 5  | 1  |
| 1  | 0  | 8   | 7  | 2  | 5  | 2  |
| 1  | 1  | 8   | 0  | 7  | 1  | 2  |
| 1  | 11 | 18  | 8  | 5  | 1  | 0  |
| 4  | 1  | 1   | 3  | 1  | 7  | 2  |
| 5  | 4  | 10  | 10 | 0  | 2  | 4  |
| 1  | 2  | 15  | 16 | 2  | 4  | 15 |
| 7  | 2  | 19  | 1  | 4  | 6  | 9  |
| 0  | 1  | 24  | 15 | 5  | 3  | 1  |
| 5  | 3  | 5   | 5  | 2  | 0  | 1  |
| 2  | 2  | 6   | 4  | 1  | 2  | 6  |
| 3  | 1  | 4   | 11 | 2  | 4  | 3  |
| 4  | 4  | 18  | 2  | 3  | 5  | 0  |
| 3  | 3  | 19  | 12 | 3  | 12 | 3  |
| 2  | 1  | 54  | 0  | 1  | 0  | 15 |
| 4  | 4  | 54  | 0  | 2  | 4  | 0  |
| 2  | 2  | 50  | 9  | 2  | 10 | 2  |
| 2  | 3  | 25  | 3  | 1  | 7  | 1  |
| 2  | 0  | 6   | 6  | 3  | 9  | 1  |
| 8  | 2  | 8   | 1  | 3  | 1  | 6  |
| 0  | 1  | 2   | 10 | 0  | 5  | 3  |
| 10 | 7  | 16  | 11 | 7  | 5  | 1  |
| 3  | 1  | 2   | 6  | 4  | 2  | 3  |
| 2  | 3  | 17  | 0  | 0  | 1  | 0  |
| 6  | 0  | 7   | 5  | 5  | 1  | 3  |
| 1  | 0  | 3   | 3  | 2  | 0  | 0  |
| 2  | 6  | 7   | 2  | 0  | 2  | 0  |
| 0  | 1  | 4   | 1  | 1  | 1  | 0  |
| 2  | 0  | 3   | 3  | 1  | 3  | 0  |
| 2  | 0  | 10  | 2  | 3  | 2  | 0  |
| 3  | 2  | 15  | 2  | 2  | 10 | 2  |
| 0  | 2  | 6   | 7  | 1  | 5  | 0  |
| 4  | 4  | 4   | 4  | 0  | 3  | 6  |
| 6  | 3  | 4   | 4  | 2  | 3  | 5  |
| 2  | 1  | 63  | 0  | 0  | 1  | 2  |
| 9  | 5  | 7   | 6  | 3  | 2  | 0  |
| 5  | 2  | 31  | 2  | 0  | 4  | 2  |
| 7  | 0  | 18  | 6  | 2  | 10 | 0  |
| 2  | 1  | 1   | 3  | 0  | 2  | 2  |
| 0  | 1  | 5   | 5  | 2  | 3  | 5  |
| 1  | 0  | 46  | 27 | 11 | 14 | 0  |
| 4  | 0  | 23  | 6  | 3  | 9  | 5  |

|    |   |    |    |   |   |    |
|----|---|----|----|---|---|----|
| 0  | 0 | 6  | 1  | 0 | 2 | 19 |
| 0  | 0 | 0  | 1  | 3 | 0 | 1  |
| 1  | 1 | 3  | 1  | 0 | 2 | 1  |
| 6  | 1 | 7  | 2  | 1 | 2 | 0  |
| 1  | 0 | 7  | 11 | 1 | 5 | 4  |
| 3  | 0 | 4  | 6  | 3 | 5 | 0  |
| 0  | 1 | 12 | 5  | 0 | 9 | 0  |
| 1  | 3 | 51 | 0  | 3 | 0 | 3  |
| 0  | 3 | 21 | 2  | 1 | 6 | 1  |
| 1  | 2 | 6  | 2  | 0 | 2 | 0  |
| 2  | 0 | 3  | 4  | 2 | 2 | 0  |
| 1  | 0 | 10 | 5  | 3 | 4 | 1  |
| 2  | 0 | 2  | 2  | 2 | 0 | 8  |
| 3  | 2 | 53 | 0  | 0 | 0 | 0  |
| 0  | 2 | 3  | 7  | 0 | 6 | 4  |
| 1  | 0 | 9  | 0  | 1 | 4 | 1  |
| 3  | 1 | 9  | 6  | 3 | 2 | 2  |
| 4  | 3 | 3  | 4  | 0 | 2 | 0  |
| 2  | 1 | 17 | 0  | 0 | 5 | 2  |
| 2  | 0 | 12 | 3  | 1 | 3 | 0  |
| 0  | 3 | 6  | 1  | 2 | 2 | 1  |
| 2  | 0 | 8  | 5  | 0 | 3 | 0  |
| 11 | 0 | 4  | 2  | 3 | 4 | 2  |
| 0  | 0 | 8  | 6  | 0 | 6 | 4  |
| 1  | 0 | 9  | 2  | 1 | 1 | 6  |
| 2  | 1 | 3  | 3  | 1 | 1 | 0  |
| 0  | 1 | 26 | 1  | 1 | 6 | 2  |
| 2  | 1 | 31 | 2  | 1 | 3 | 0  |
| 0  | 0 | 3  | 8  | 0 | 1 | 7  |
| 1  | 1 | 6  | 4  | 3 | 4 | 0  |
| 1  | 2 | 8  | 28 | 1 | 0 | 1  |
| 2  | 0 | 3  | 4  | 1 | 4 | 5  |
| 0  | 0 | 11 | 0  | 1 | 4 | 0  |
| 1  | 0 | 0  | 1  | 1 | 1 | 1  |
| 0  | 1 | 41 | 0  | 0 | 1 | 1  |
| 1  | 3 | 3  | 2  | 0 | 0 | 0  |
| 3  | 0 | 7  | 1  | 0 | 3 | 0  |
| 0  | 1 | 5  | 4  | 0 | 2 | 1  |
| 1  | 3 | 3  | 4  | 1 | 3 | 2  |
| 0  | 2 | 5  | 8  | 2 | 1 | 3  |
| 1  | 1 | 7  | 3  | 3 | 2 | 2  |
| 3  | 1 | 7  | 0  | 0 | 2 | 4  |
| 0  | 0 | 5  | 1  | 2 | 1 | 0  |
| 3  | 2 | 7  | 2  | 2 | 2 | 2  |
| 0  | 0 | 3  | 6  | 0 | 1 | 0  |
| 2  | 0 | 1  | 0  | 1 | 2 | 2  |
| 2  | 0 | 8  | 3  | 1 | 0 | 0  |
| 1  | 1 | 2  | 5  | 1 | 3 | 4  |
| 6  | 1 | 13 | 1  | 0 | 3 | 0  |
| 0  | 0 | 4  | 0  | 1 | 0 | 0  |
| 1  | 1 | 4  | 4  | 1 | 0 | 0  |
| 1  | 0 | 8  | 2  | 2 | 0 | 0  |
| 0  | 2 | 16 | 0  | 0 | 2 | 0  |
| 0  | 4 | 0  | 1  | 0 | 1 | 1  |
| 0  | 1 | 3  | 2  | 0 | 1 | 1  |
| 0  | 2 | 16 | 0  | 0 | 2 | 3  |
| 1  | 0 | 7  | 2  | 0 | 2 | 0  |
| 0  | 2 | 1  | 1  | 0 | 2 | 1  |
| 0  | 3 | 11 | 1  | 0 | 1 | 0  |

|   |   |    |   |   |   |   |
|---|---|----|---|---|---|---|
| 2 | 1 | 18 | 1 | 0 | 3 | 3 |
| 0 | 0 | 1  | 3 | 3 | 0 | 1 |
| 0 | 1 | 6  | 0 | 0 | 1 | 1 |
| 0 | 0 | 9  | 0 | 1 | 1 | 2 |
| 1 | 2 | 6  | 4 | 4 | 0 | 1 |
| 1 | 0 | 4  | 6 | 0 | 2 | 2 |
| 0 | 0 | 0  | 0 | 0 | 0 | 1 |
| 3 | 0 | 10 | 3 | 1 | 1 | 0 |
| 3 | 0 | 8  | 1 | 2 | 2 | 1 |
| 0 | 0 | 5  | 0 | 1 | 3 | 2 |
| 3 | 0 | 13 | 0 | 0 | 2 | 0 |
| 1 | 0 | 58 | 1 | 0 | 0 | 0 |
| 0 | 0 | 43 | 0 | 0 | 0 | 0 |
| 0 | 0 | 6  | 1 | 0 | 0 | 4 |
| 0 | 0 | 1  | 2 | 0 | 0 | 1 |
| 2 | 1 | 7  | 0 | 0 | 2 | 1 |
| 0 | 0 | 1  | 2 | 0 | 4 | 2 |
| 5 | 5 | 6  | 3 | 1 | 1 | 1 |
| 0 | 0 | 40 | 0 | 0 | 0 | 0 |
| 0 | 1 | 7  | 1 | 0 | 0 | 0 |
| 1 | 2 | 9  | 0 | 0 | 0 | 0 |
| 1 | 0 | 2  | 1 | 0 | 0 | 0 |
| 3 | 0 | 1  | 0 | 0 | 0 | 0 |
| 2 | 1 | 2  | 0 | 1 | 3 | 1 |
| 0 | 0 | 4  | 5 | 2 | 1 | 4 |
| 0 | 0 | 24 | 0 | 0 | 0 | 0 |
| 0 | 0 | 2  | 0 | 1 | 0 | 0 |
| 2 | 1 | 10 | 1 | 0 | 1 | 1 |
| 0 | 2 | 8  | 3 | 0 | 7 | 1 |
| 1 | 0 | 6  | 1 | 1 | 3 | 1 |
| 1 | 1 | 19 | 0 | 0 | 0 | 0 |
| 0 | 1 | 4  | 0 | 0 | 1 | 3 |
| 1 | 0 | 2  | 1 | 1 | 2 | 0 |
| 0 | 0 | 1  | 2 | 0 | 4 | 3 |
| 1 | 1 | 4  | 1 | 0 | 0 | 0 |
| 1 | 0 | 4  | 2 | 0 | 1 | 3 |
| 1 | 0 | 4  | 4 | 3 | 0 | 0 |
| 1 | 0 | 8  | 1 | 0 | 5 | 5 |
| 1 | 0 | 2  | 0 | 0 | 1 | 0 |
| 0 | 3 | 0  | 0 | 0 | 0 | 0 |
| 1 | 0 | 12 | 0 | 0 | 1 | 1 |
| 1 | 1 | 2  | 0 | 0 | 1 | 0 |
| 1 | 2 | 1  | 1 | 1 | 1 | 1 |
| 0 | 0 | 3  | 0 | 0 | 0 | 0 |
| 1 | 1 | 5  | 0 | 0 | 2 | 0 |
| 0 | 2 | 14 | 0 | 2 | 1 | 0 |
| 1 | 0 | 22 | 0 | 0 | 0 | 0 |
| 0 | 0 | 2  | 0 | 0 | 0 | 0 |
| 4 | 0 | 4  | 1 | 2 | 2 | 0 |
| 1 | 1 | 1  | 1 | 0 | 3 | 0 |
| 0 | 1 | 2  | 1 | 1 | 1 | 0 |
| 0 | 0 | 16 | 1 | 1 | 3 | 0 |
| 1 | 0 | 5  | 1 | 0 | 0 | 0 |
| 0 | 2 | 3  | 1 | 0 | 0 | 1 |
| 1 | 1 | 4  | 1 | 0 | 3 | 0 |
| 1 | 2 | 9  | 2 | 0 | 3 | 1 |
| 0 | 1 | 5  | 2 | 0 | 2 | 0 |
| 0 | 0 | 2  | 1 | 0 | 0 | 2 |
| 0 | 1 | 1  | 1 | 1 | 0 | 0 |



|   |   |    |   |   |   |   |
|---|---|----|---|---|---|---|
| 1 | 0 | 1  | 1 | 0 | 0 | 2 |
| 1 | 0 | 2  | 0 | 0 | 0 | 0 |
| 1 | 0 | 3  | 0 | 1 | 0 | 0 |
| 0 | 0 | 2  | 3 | 0 | 1 | 1 |
| 1 | 0 | 8  | 2 | 4 | 1 | 0 |
| 1 | 0 | 18 | 1 | 0 | 0 | 0 |
| 0 | 0 | 2  | 1 | 1 | 0 | 0 |
| 0 | 0 | 11 | 0 | 0 | 0 | 1 |
| 0 | 1 | 4  | 1 | 2 | 0 | 2 |
| 1 | 0 | 6  | 1 | 0 | 0 | 0 |
| 0 | 0 | 1  | 0 | 0 | 0 | 0 |
| 0 | 0 | 5  | 2 | 0 | 3 | 0 |
| 1 | 2 | 14 | 0 | 0 | 0 | 0 |
| 0 | 0 | 6  | 2 | 1 | 0 | 1 |
| 1 | 0 | 9  | 3 | 0 | 5 | 1 |
| 1 | 0 | 4  | 1 | 0 | 3 | 0 |
| 2 | 0 | 1  | 3 | 0 | 0 | 0 |
| 0 | 0 | 19 | 3 | 0 | 0 | 0 |
| 0 | 0 | 14 | 0 | 0 | 1 | 0 |
| 0 | 2 | 2  | 2 | 0 | 1 | 0 |
| 0 | 0 | 8  | 0 | 0 | 2 | 0 |
| 0 | 0 | 17 | 0 | 0 | 0 | 0 |
| 1 | 0 | 10 | 0 | 0 | 0 | 0 |
| 0 | 1 | 0  | 1 | 2 | 1 | 1 |
| 2 | 0 | 0  | 0 | 0 | 0 | 1 |
| 3 | 1 | 3  | 0 | 0 | 0 | 0 |
| 1 | 0 | 0  | 0 | 0 | 0 | 0 |
| 1 | 0 | 0  | 1 | 0 | 0 | 0 |
| 0 | 0 | 12 | 0 | 1 | 0 | 0 |
| 0 | 0 | 18 | 1 | 0 | 4 | 0 |
| 1 | 5 | 11 | 0 | 1 | 0 | 1 |
| 0 | 1 | 2  | 2 | 0 | 1 | 1 |
| 1 | 1 | 4  | 2 | 0 | 3 | 0 |
| 0 | 0 | 2  | 1 | 0 | 1 | 0 |
| 2 | 1 | 1  | 1 | 1 | 0 | 0 |
| 0 | 1 | 3  | 0 | 0 | 0 | 0 |
| 0 | 1 | 1  | 2 | 0 | 0 | 1 |
| 0 | 0 | 3  | 1 | 0 | 2 | 2 |
| 1 | 0 | 2  | 1 | 0 | 0 | 0 |
| 2 | 0 | 0  | 1 | 0 | 0 | 0 |
| 0 | 0 | 7  | 0 | 0 | 1 | 0 |
| 2 | 0 | 0  | 0 | 0 | 0 | 0 |
| 1 | 0 | 1  | 0 | 0 | 0 | 1 |
| 0 | 0 | 2  | 4 | 0 | 1 | 1 |
| 0 | 0 | 4  | 1 | 2 | 0 | 2 |
| 0 | 2 | 4  | 2 | 1 | 2 | 1 |
| 0 | 1 | 2  | 1 | 0 | 1 | 1 |
| 0 | 0 | 1  | 0 | 0 | 2 | 1 |
| 1 | 0 | 1  | 0 | 0 | 1 | 0 |
| 1 | 0 | 2  | 1 | 0 | 0 | 1 |
| 1 | 1 | 0  | 0 | 0 | 0 | 1 |
| 1 | 0 | 10 | 0 | 0 | 0 | 0 |
| 0 | 0 | 6  | 1 | 0 | 0 | 1 |
| 0 | 0 | 2  | 0 | 0 | 2 | 1 |
| 1 | 0 | 5  | 2 | 1 | 3 | 1 |
| 1 | 0 | 2  | 2 | 0 | 2 | 1 |
| 0 | 0 | 1  | 2 | 0 | 0 | 0 |
| 0 | 0 | 0  | 1 | 1 | 0 | 0 |
| 0 | 0 | 1  | 0 | 0 | 0 | 0 |

|        |        |         |         |        |         |         |
|--------|--------|---------|---------|--------|---------|---------|
| 1      | 1      | 2       | 0       | 0      | 1       | 1       |
| 1      | 0      | 0       | 1       | 1      | 1       | 2       |
| 0      | 0      | 4       | 0       | 1      | 0       | 2       |
| 0      | 0      | 3       | 1       | 0      | 1       | 0       |
| 0      | 0      | 3       | 0       | 2      | 1       | 0       |
| 4      | 1      | 6       | 1       | 2      | 0       | 2       |
| 1      | 0      | 1       | 0       | 1      | 0       | 1       |
| 0      | 0      | 3       | 1       | 1      | 2       | 0       |
| 0      | 0      | 2       | 0       | 0      | 0       | 0       |
| 1      | 0      | 0       | 4       | 0      | 0       | 0       |
| 1      | 3      | 1       | 0       | 0      | 1       | 2       |
| 0      | 0      | 2       | 2       | 0      | 0       | 1       |
| 0      | 0      | 0       | 0       | 0      | 0       | 0       |
| G_31   | G_32   | G_4     | G_5     | G_6    | G_7     | A_10    |
| CHR_NP | CHR_NP | CHR_NP  | CHR_NP  | CHR_NP | CHR_NP  | CHR_P   |
| 611755 | 504822 | 7342160 | 5152596 | 969299 | 5229327 | 3409557 |
| 17     | 19     | 21      | 25      | 21     | 25      | 27      |
| -0.91  | -0.51  | -0.09   | 0.82    | -0.06  | 0.70    | 1.26    |



|        |         |        |        |       |        |        |
|--------|---------|--------|--------|-------|--------|--------|
| 0.27   | 0.77    | 0.85   | 0.91   | 0.31  | 0.22   | 0.11   |
| 23     | 13      | 10     | 7      | 16    | 19     | 22     |
| 1      | 1       | 1      | 1      | 1     | 1      | 1      |
| 64     | 65      | 66     | 67     | 68    | 69     | 70     |
| 37     | 38      | 1      | 2      | 3     | 4      | 5      |
| G_6    | G_7     | A_10   | A_12   | A_18  | A_3    | A_5    |
| CHR_NP | CHR_NP  | CHR_P  | CHR_P  | CHR_P | CHR_P  | CHR_P  |
| 488065 | 1421920 | 492624 | 721119 | 27468 | 816795 | 972175 |
| G_6    | G_7     | A_10   | A_12   | A_18  | A_3    | A_5    |
| 196834 | 399578  | 190797 | 261344 | 6469  | 132111 | 198821 |
| 33091  | 131009  | 7668   | 13505  | 8375  | 34328  | 58994  |
| 30921  | 36819   | 10054  | 7691   | 750   | 35614  | 51330  |
| 48784  | 152679  | 37879  | 14227  | 1228  | 168094 | 97543  |
| 30262  | 81663   | 47947  | 12291  | 536   | 64203  | 87260  |
| 10574  | 100931  | 5499   | 86372  | 452   | 20677  | 38724  |
| 29185  | 86225   | 4865   | 15656  | 647   | 22001  | 51972  |
| 1738   | 15269   | 4480   | 24861  | 117   | 4457   | 7468   |
| 8204   | 87617   | 5810   | 49674  | 88    | 6761   | 18115  |
| 7982   | 44347   | 28115  | 80322  | 1803  | 36876  | 40293  |
| 9832   | 27797   | 31440  | 24136  | 674   | 26458  | 23921  |
| 6971   | 19045   | 8308   | 8992   | 204   | 26259  | 32101  |
| 7614   | 28174   | 9824   | 5991   | 139   | 30575  | 25249  |
| 7585   | 22198   | 7741   | 9409   | 238   | 38899  | 20915  |
| 1801   | 11236   | 11411  | 3972   | 189   | 9342   | 9807   |
| 3840   | 4218    | 5821   | 1658   | 7     | 2939   | 3906   |
| 932    | 9345    | 1238   | 4083   | 91    | 5496   | 12964  |
| 1264   | 4671    | 5981   | 3990   | 345   | 13701  | 17197  |
| 2901   | 11037   | 1600   | 9484   | 119   | 2645   | 8526   |

|      |       |      |      |     |       |       |
|------|-------|------|------|-----|-------|-------|
| 2305 | 6613  | 3207 | 4091 | 768 | 2897  | 7001  |
| 1506 | 4148  | 2184 | 2473 | 149 | 3338  | 6047  |
| 2124 | 7540  | 5042 | 5947 | 167 | 10042 | 10806 |
| 1093 | 4874  | 1341 | 3135 | 126 | 869   | 3590  |
| 655  | 4418  | 858  | 3250 | 109 | 2006  | 9031  |
| 999  | 10956 | 1605 | 2971 | 300 | 1547  | 5495  |
| 997  | 4583  | 1511 | 4140 | 22  | 1660  | 3495  |
| 1962 | 5290  | 5431 | 1563 | 58  | 9033  | 4396  |
| 1329 | 1938  | 6034 | 2972 | 204 | 2727  | 3487  |
| 1244 | 5804  | 1572 | 1962 | 124 | 6624  | 5075  |
| 1864 | 4373  | 1013 | 2288 | 86  | 1596  | 2878  |
| 1624 | 4144  | 838  | 1545 | 37  | 2190  | 5104  |
| 2848 | 6975  | 2236 | 513  | 18  | 9944  | 5368  |
| 789  | 3611  | 544  | 3180 | 9   | 1671  | 3742  |
| 342  | 591   | 715  | 2604 | 32  | 547   | 1978  |
| 1134 | 5192  | 1112 | 1315 | 86  | 4632  | 3492  |
| 1422 | 4545  | 796  | 2471 | 193 | 15156 | 5512  |
| 686  | 4225  | 1073 | 3383 | 483 | 2811  | 3748  |
| 942  | 4989  | 1075 | 3737 | 399 | 1795  | 3909  |
| 1021 | 1788  | 178  | 479  | 145 | 911   | 2595  |
| 2366 | 3556  | 2757 | 470  | 12  | 4393  | 2097  |
| 348  | 817   | 563  | 718  | 114 | 3445  | 5257  |
| 928  | 1980  | 2074 | 344  | 10  | 1815  | 2919  |
| 794  | 2672  | 607  | 1017 | 63  | 3797  | 3856  |
| 210  | 1372  | 613  | 909  | 79  | 711   | 712   |
| 514  | 1473  | 974  | 1334 | 103 | 1435  | 2476  |
| 731  | 1358  | 637  | 750  | 34  | 1382  | 3150  |
| 937  | 1954  | 201  | 1003 | 16  | 858   | 1667  |
| 687  | 1241  | 1701 | 515  | 24  | 1322  | 2479  |
| 187  | 702   | 277  | 124  | 1   | 981   | 727   |
| 124  | 447   | 1549 | 350  | 8   | 45    | 410   |
| 477  | 270   | 91   | 664  | 14  | 1172  | 1836  |
| 203  | 826   | 167  | 509  | 31  | 663   | 1584  |
| 394  | 1111  | 255  | 1145 | 63  | 1159  | 1265  |
| 107  | 509   | 2169 | 382  | 52  | 524   | 2087  |
| 663  | 2020  | 258  | 382  | 0   | 12    | 46    |
| 42   | 155   | 358  | 255  | 3   | 43    | 126   |
| 409  | 1731  | 103  | 890  | 24  | 939   | 1409  |
| 179  | 781   | 256  | 247  | 7   | 368   | 1337  |
| 378  | 776   | 421  | 409  | 37  | 823   | 1500  |
| 576  | 556   | 317  | 147  | 66  | 925   | 1334  |
| 295  | 481   | 231  | 578  | 16  | 1649  | 1798  |
| 176  | 567   | 569  | 275  | 6   | 243   | 634   |
| 40   | 372   | 31   | 792  | 9   | 94    | 207   |
| 14   | 80    | 5    | 61   | 1   | 7     | 37    |
| 498  | 875   | 1075 | 198  | 31  | 2408  | 869   |
| 222  | 1097  | 173  | 747  | 19  | 1011  | 1035  |
| 167  | 346   | 118  | 637  | 3   | 199   | 376   |
| 107  | 752   | 287  | 330  | 6   | 544   | 646   |
| 70   | 433   | 155  | 307  | 8   | 420   | 957   |
| 208  | 634   | 130  | 888  | 111 | 387   | 591   |
| 275  | 313   | 86   | 309  | 21  | 537   | 548   |
| 156  | 327   | 426  | 289  | 9   | 1862  | 954   |
| 98   | 531   | 270  | 464  | 16  | 291   | 468   |
| 175  | 827   | 407  | 527  | 8   | 301   | 336   |
| 196  | 495   | 60   | 244  | 7   | 228   | 798   |
| 225  | 116   | 206  | 179  | 5   | 741   | 1033  |
| 373  | 1134  | 187  | 288  | 0   | 16    | 43    |
| 417  | 650   | 41   | 157  | 107 | 109   | 254   |

|     |     |     |     |    |      |     |
|-----|-----|-----|-----|----|------|-----|
| 252 | 356 | 432 | 49  | 2  | 659  | 614 |
| 80  | 141 | 23  | 231 | 15 | 347  | 262 |
| 122 | 698 | 120 | 385 | 4  | 658  | 949 |
| 108 | 173 | 352 | 111 | 0  | 142  | 322 |
| 218 | 310 | 57  | 88  | 28 | 1066 | 638 |
| 61  | 54  | 45  | 423 | 3  | 33   | 138 |
| 101 | 502 | 63  | 239 | 13 | 98   | 367 |
| 75  | 150 | 92  | 162 | 0  | 189  | 346 |
| 160 | 189 | 70  | 116 | 10 | 367  | 406 |
| 44  | 574 | 148 | 402 | 1  | 283  | 467 |
| 78  | 328 | 71  | 273 | 5  | 282  | 579 |
| 171 | 260 | 183 | 38  | 6  | 413  | 439 |
| 78  | 253 | 282 | 43  | 6  | 184  | 232 |
| 10  | 41  | 6   | 17  | 0  | 19   | 9   |
| 99  | 174 | 89  | 111 | 1  | 91   | 322 |
| 67  | 331 | 40  | 269 | 6  | 80   | 215 |
| 25  | 121 | 36  | 159 | 0  | 43   | 107 |
| 31  | 121 | 90  | 97  | 4  | 111  | 350 |
| 102 | 123 | 92  | 26  | 6  | 148  | 215 |
| 95  | 138 | 241 | 58  | 11 | 245  | 323 |
| 115 | 210 | 120 | 48  | 15 | 343  | 406 |
| 22  | 199 | 19  | 93  | 0  | 39   | 66  |
| 32  | 99  | 36  | 238 | 2  | 548  | 373 |
| 89  | 352 | 8   | 104 | 1  | 93   | 182 |
| 170 | 165 | 85  | 79  | 1  | 201  | 227 |
| 80  | 228 | 108 | 65  | 19 | 200  | 306 |
| 45  | 225 | 27  | 287 | 4  | 147  | 300 |
| 24  | 185 | 268 | 247 | 3  | 122  | 165 |
| 58  | 71  | 18  | 66  | 8  | 112  | 234 |
| 45  | 201 | 12  | 86  | 7  | 85   | 159 |
| 43  | 182 | 31  | 144 | 0  | 154  | 203 |
| 65  | 341 | 80  | 93  | 0  | 81   | 133 |
| 29  | 154 | 126 | 57  | 4  | 67   | 237 |
| 51  | 102 | 98  | 48  | 3  | 187  | 260 |
| 40  | 98  | 46  | 80  | 2  | 200  | 293 |
| 38  | 314 | 42  | 126 | 7  | 230  | 314 |
| 62  | 64  | 21  | 14  | 3  | 50   | 146 |
| 76  | 195 | 101 | 42  | 7  | 282  | 229 |
| 29  | 452 | 154 | 50  | 3  | 81   | 158 |
| 55  | 104 | 29  | 101 | 1  | 123  | 220 |
| 55  | 104 | 29  | 101 | 1  | 123  | 220 |
| 45  | 87  | 37  | 116 | 4  | 211  | 195 |
| 35  | 136 | 49  | 271 | 2  | 81   | 98  |
| 18  | 66  | 95  | 71  | 3  | 77   | 185 |
| 42  | 32  | 22  | 69  | 1  | 15   | 72  |
| 15  | 69  | 101 | 55  | 5  | 27   | 111 |
| 9   | 19  | 1   | 3   | 0  | 2    | 5   |
| 66  | 62  | 19  | 30  | 2  | 174  | 222 |
| 51  | 124 | 6   | 72  | 2  | 45   | 71  |
| 34  | 39  | 30  | 34  | 0  | 68   | 115 |
| 10  | 22  | 22  | 32  | 5  | 170  | 162 |
| 29  | 88  | 65  | 4   | 3  | 71   | 160 |
| 137 | 304 | 3   | 20  | 1  | 4    | 5   |
| 42  | 51  | 78  | 48  | 2  | 74   | 221 |
| 25  | 86  | 23  | 60  | 2  | 36   | 85  |
| 8   | 30  | 11  | 46  | 4  | 84   | 115 |
| 25  | 67  | 16  | 150 | 0  | 21   | 129 |
| 13  | 61  | 54  | 22  | 0  | 29   | 98  |
| 26  | 161 | 126 | 43  | 0  | 21   | 29  |

|    |     |     |     |   |     |     |
|----|-----|-----|-----|---|-----|-----|
| 25 | 65  | 31  | 88  | 0 | 89  | 82  |
| 27 | 68  | 21  | 34  | 1 | 54  | 94  |
| 26 | 86  | 13  | 26  | 2 | 66  | 85  |
| 38 | 97  | 50  | 22  | 1 | 12  | 25  |
| 23 | 58  | 11  | 65  | 1 | 42  | 52  |
| 32 | 46  | 122 | 13  | 0 | 187 | 93  |
| 46 | 60  | 21  | 11  | 1 | 59  | 154 |
| 4  | 23  | 1   | 28  | 0 | 9   | 9   |
| 50 | 73  | 18  | 30  | 0 | 220 | 73  |
| 22 | 38  | 23  | 15  | 0 | 82  | 196 |
| 28 | 76  | 10  | 20  | 1 | 21  | 80  |
| 40 | 104 | 23  | 38  | 0 | 128 | 105 |
| 22 | 56  | 17  | 32  | 2 | 273 | 128 |
| 13 | 39  | 37  | 51  | 1 | 5   | 27  |
| 23 | 117 | 27  | 57  | 0 | 96  | 108 |
| 10 | 9   | 44  | 49  | 0 | 4   | 35  |
| 19 | 43  | 15  | 11  | 0 | 33  | 99  |
| 20 | 15  | 142 | 4   | 0 | 13  | 52  |
| 27 | 56  | 8   | 41  | 2 | 120 | 58  |
| 21 | 94  | 23  | 15  | 4 | 77  | 44  |
| 9  | 10  | 13  | 37  | 1 | 75  | 39  |
| 10 | 36  | 12  | 32  | 0 | 48  | 95  |
| 25 | 107 | 44  | 31  | 1 | 23  | 22  |
| 2  | 8   | 1   | 4   | 0 | 4   | 7   |
| 16 | 20  | 5   | 17  | 1 | 43  | 74  |
| 25 | 62  | 15  | 10  | 2 | 63  | 46  |
| 9  | 16  | 11  | 38  | 0 | 17  | 52  |
| 8  | 22  | 12  | 14  | 1 | 11  | 68  |
| 41 | 47  | 30  | 16  | 2 | 82  | 51  |
| 8  | 34  | 10  | 11  | 0 | 48  | 65  |
| 64 | 25  | 6   | 238 | 2 | 14  | 14  |
| 10 | 21  | 5   | 18  | 1 | 2   | 10  |
| 13 | 33  | 45  | 43  | 1 | 65  | 68  |
| 13 | 18  | 8   | 6   | 0 | 17  | 25  |
| 24 | 65  | 61  | 54  | 0 | 8   | 35  |
| 19 | 29  | 21  | 15  | 2 | 28  | 32  |
| 4  | 39  | 13  | 15  | 0 | 16  | 31  |
| 7  | 20  | 6   | 14  | 1 | 2   | 46  |
| 19 | 30  | 16  | 9   | 0 | 53  | 60  |
| 10 | 11  | 4   | 45  | 0 | 83  | 96  |
| 13 | 42  | 16  | 22  | 1 | 23  | 46  |
| 5  | 16  | 6   | 56  | 2 | 24  | 34  |
| 21 | 8   | 1   | 19  | 0 | 58  | 56  |
| 30 | 1   | 14  | 0   | 1 | 41  | 47  |
| 10 | 41  | 11  | 20  | 0 | 13  | 22  |
| 15 | 4   | 14  | 28  | 0 | 30  | 76  |
| 10 | 52  | 11  | 67  | 1 | 30  | 28  |
| 13 | 10  | 50  | 28  | 5 | 48  | 48  |
| 20 | 27  | 27  | 17  | 0 | 49  | 55  |
| 10 | 41  | 9   | 17  | 0 | 13  | 21  |
| 4  | 4   | 14  | 25  | 0 | 106 | 112 |
| 20 | 26  | 10  | 8   | 0 | 23  | 30  |
| 14 | 46  | 6   | 4   | 0 | 2   | 12  |
| 91 | 120 | 0   | 99  | 2 | 16  | 29  |
| 2  | 28  | 10  | 32  | 1 | 5   | 7   |
| 2  | 7   | 9   | 17  | 1 | 52  | 80  |
| 23 | 29  | 29  | 4   | 1 | 36  | 75  |
| 16 | 49  | 7   | 38  | 0 | 17  | 21  |
| 27 | 68  | 4   | 4   | 2 | 25  | 35  |

|    |     |    |    |   |     |    |
|----|-----|----|----|---|-----|----|
| 0  | 6   | 36 | 7  | 0 | 1   | 9  |
| 17 | 59  | 27 | 15 | 0 | 66  | 46 |
| 3  | 15  | 5  | 22 | 1 | 21  | 50 |
| 23 | 30  | 4  | 13 | 0 | 17  | 64 |
| 20 | 34  | 5  | 0  | 0 | 24  | 50 |
| 32 | 75  | 29 | 21 | 0 | 11  | 32 |
| 9  | 27  | 17 | 4  | 1 | 96  | 44 |
| 9  | 14  | 12 | 6  | 0 | 2   | 36 |
| 6  | 29  | 8  | 34 | 1 | 49  | 37 |
| 24 | 6   | 4  | 19 | 0 | 16  | 26 |
| 31 | 43  | 4  | 11 | 0 | 38  | 30 |
| 9  | 22  | 11 | 10 | 0 | 52  | 60 |
| 5  | 9   | 11 | 11 | 0 | 15  | 46 |
| 10 | 39  | 61 | 30 | 0 | 101 | 29 |
| 5  | 12  | 8  | 9  | 1 | 64  | 63 |
| 6  | 17  | 1  | 6  | 0 | 8   | 41 |
| 4  | 7   | 3  | 20 | 0 | 22  | 32 |
| 12 | 19  | 20 | 5  | 0 | 65  | 44 |
| 5  | 25  | 24 | 8  | 0 | 4   | 9  |
| 12 | 21  | 2  | 3  | 1 | 9   | 25 |
| 13 | 31  | 2  | 4  | 0 | 4   | 9  |
| 7  | 30  | 13 | 3  | 2 | 0   | 23 |
| 0  | 2   | 2  | 0  | 0 | 1   | 0  |
| 4  | 49  | 1  | 4  | 0 | 28  | 30 |
| 32 | 143 | 0  | 17 | 1 | 1   | 7  |
| 10 | 20  | 4  | 27 | 0 | 22  | 29 |
| 5  | 16  | 2  | 18 | 0 | 14  | 35 |
| 8  | 17  | 14 | 30 | 1 | 38  | 26 |
| 10 | 6   | 2  | 11 | 0 | 43  | 66 |
| 11 | 14  | 5  | 3  | 0 | 8   | 14 |
| 13 | 32  | 13 | 4  | 0 | 40  | 25 |
| 8  | 40  | 14 | 6  | 0 | 16  | 18 |
| 9  | 11  | 6  | 4  | 0 | 43  | 39 |
| 4  | 19  | 3  | 27 | 3 | 20  | 16 |
| 2  | 9   | 2  | 21 | 0 | 3   | 11 |
| 4  | 17  | 6  | 8  | 2 | 35  | 16 |
| 0  | 4   | 0  | 8  | 0 | 2   | 1  |
| 9  | 5   | 6  | 7  | 0 | 9   | 16 |
| 7  | 28  | 5  | 5  | 0 | 1   | 8  |
| 10 | 16  | 5  | 12 | 0 | 23  | 17 |
| 5  | 5   | 3  | 3  | 0 | 9   | 13 |
| 2  | 6   | 7  | 5  | 0 | 8   | 17 |
| 5  | 14  | 4  | 5  | 0 | 4   | 16 |
| 16 | 17  | 1  | 3  | 0 | 10  | 20 |
| 5  | 4   | 5  | 13 | 1 | 27  | 42 |
| 1  | 9   | 1  | 21 | 0 | 5   | 8  |
| 2  | 20  | 2  | 14 | 0 | 6   | 18 |
| 5  | 13  | 3  | 12 | 0 | 3   | 14 |
| 5  | 13  | 3  | 12 | 0 | 3   | 14 |
| 10 | 1   | 2  | 4  | 0 | 25  | 19 |
| 3  | 18  | 7  | 6  | 0 | 44  | 20 |
| 11 | 19  | 1  | 2  | 0 | 11  | 9  |
| 7  | 2   | 1  | 4  | 0 | 16  | 20 |
| 4  | 13  | 0  | 4  | 0 | 5   | 12 |
| 4  | 10  | 6  | 3  | 0 | 4   | 23 |
| 4  | 12  | 17 | 10 | 0 | 6   | 22 |
| 6  | 34  | 9  | 9  | 0 | 14  | 9  |
| 3  | 9   | 4  | 1  | 0 | 5   | 3  |
| 1  | 10  | 3  | 5  | 1 | 5   | 23 |

|    |    |    |    |   |    |    |
|----|----|----|----|---|----|----|
| 2  | 24 | 2  | 1  | 0 | 2  | 6  |
| 10 | 11 | 12 | 5  | 0 | 15 | 19 |
| 4  | 13 | 2  | 19 | 1 | 14 | 11 |
| 1  | 2  | 0  | 3  | 0 | 0  | 1  |
| 5  | 9  | 7  | 10 | 0 | 27 | 24 |
| 4  | 17 | 3  | 10 | 0 | 7  | 28 |
| 7  | 13 | 1  | 1  | 0 | 10 | 14 |
| 7  | 7  | 6  | 4  | 0 | 43 | 25 |
| 4  | 17 | 3  | 10 | 0 | 4  | 24 |
| 8  | 5  | 14 | 2  | 1 | 7  | 20 |
| 5  | 7  | 9  | 5  | 0 | 17 | 20 |
| 1  | 9  | 0  | 13 | 0 | 7  | 13 |
| 1  | 10 | 11 | 1  | 0 | 17 | 4  |
| 0  | 0  | 0  | 0  | 0 | 0  | 1  |
| 4  | 6  | 7  | 1  | 0 | 3  | 6  |
| 8  | 8  | 13 | 3  | 1 | 39 | 15 |
| 6  | 11 | 6  | 5  | 0 | 51 | 18 |
| 1  | 1  | 4  | 3  | 0 | 20 | 22 |
| 6  | 23 | 7  | 6  | 0 | 11 | 14 |
| 1  | 0  | 2  | 0  | 0 | 2  | 1  |
| 1  | 9  | 4  | 6  | 0 | 51 | 31 |
| 1  | 13 | 7  | 7  | 0 | 3  | 12 |
| 0  | 0  | 1  | 4  | 0 | 69 | 1  |
| 5  | 13 | 6  | 1  | 1 | 49 | 8  |
| 5  | 6  | 7  | 6  | 0 | 9  | 23 |
| 2  | 8  | 0  | 4  | 1 | 15 | 9  |
| 0  | 1  | 1  | 7  | 0 | 15 | 13 |
| 3  | 11 | 6  | 3  | 0 | 16 | 8  |
| 3  | 0  | 1  | 5  | 0 | 16 | 30 |
| 0  | 13 | 2  | 4  | 0 | 1  | 5  |
| 3  | 5  | 2  | 6  | 1 | 20 | 10 |
| 7  | 8  | 2  | 2  | 0 | 5  | 11 |
| 1  | 13 | 6  | 5  | 0 | 2  | 11 |
| 2  | 1  | 2  | 8  | 0 | 12 | 17 |
| 0  | 8  | 3  | 5  | 0 | 0  | 4  |
| 0  | 2  | 0  | 4  | 0 | 9  | 4  |
| 4  | 24 | 0  | 2  | 1 | 1  | 3  |
| 7  | 4  | 1  | 1  | 0 | 20 | 15 |
| 6  | 6  | 2  | 12 | 0 | 5  | 9  |
| 3  | 1  | 27 | 0  | 0 | 2  | 7  |
| 2  | 1  | 7  | 6  | 0 | 8  | 13 |
| 1  | 7  | 3  | 9  | 0 | 7  | 7  |
| 5  | 14 | 4  | 1  | 1 | 15 | 11 |
| 5  | 5  | 1  | 5  | 0 | 4  | 5  |
| 2  | 5  | 2  | 6  | 0 | 1  | 4  |
| 7  | 1  | 2  | 13 | 0 | 9  | 17 |
| 5  | 1  | 0  | 1  | 0 | 3  | 8  |
| 1  | 7  | 2  | 4  | 0 | 17 | 18 |
| 0  | 2  | 4  | 0  | 0 | 1  | 10 |
| 2  | 4  | 15 | 4  | 0 | 17 | 7  |
| 4  | 6  | 9  | 3  | 0 | 8  | 4  |
| 5  | 3  | 1  | 0  | 0 | 11 | 5  |
| 2  | 0  | 1  | 6  | 1 | 14 | 11 |
| 1  | 2  | 6  | 2  | 0 | 4  | 10 |
| 2  | 4  | 3  | 5  | 0 | 4  | 21 |
| 3  | 5  | 0  | 0  | 0 | 3  | 7  |
| 3  | 12 | 3  | 2  | 0 | 6  | 6  |
| 1  | 0  | 15 | 4  | 0 | 2  | 6  |
| 2  | 4  | 0  | 2  | 0 | 0  | 1  |

|    |    |    |    |   |    |    |
|----|----|----|----|---|----|----|
| 2  | 10 | 2  | 4  | 2 | 10 | 12 |
| 1  | 7  | 1  | 4  | 1 | 15 | 9  |
| 3  | 9  | 1  | 8  | 2 | 14 | 9  |
| 3  | 1  | 6  | 2  | 0 | 3  | 7  |
| 0  | 5  | 3  | 2  | 0 | 2  | 5  |
| 7  | 5  | 1  | 1  | 0 | 7  | 6  |
| 4  | 2  | 3  | 1  | 0 | 1  | 3  |
| 0  | 1  | 0  | 6  | 0 | 2  | 7  |
| 5  | 1  | 3  | 1  | 0 | 4  | 11 |
| 2  | 0  | 0  | 2  | 0 | 4  | 6  |
| 0  | 2  | 0  | 0  | 0 | 3  | 7  |
| 1  | 1  | 0  | 4  | 0 | 10 | 16 |
| 1  | 3  | 0  | 11 | 0 | 8  | 7  |
| 3  | 2  | 0  | 5  | 0 | 12 | 6  |
| 2  | 10 | 2  | 10 | 0 | 14 | 9  |
| 1  | 5  | 0  | 3  | 0 | 10 | 7  |
| 0  | 3  | 6  | 0  | 0 | 4  | 16 |
| 2  | 3  | 5  | 0  | 0 | 14 | 6  |
| 0  | 1  | 2  | 6  | 0 | 0  | 1  |
| 3  | 2  | 0  | 1  | 0 | 7  | 9  |
| 0  | 4  | 2  | 7  | 1 | 0  | 5  |
| 2  | 10 | 0  | 2  | 0 | 1  | 3  |
| 0  | 2  | 2  | 1  | 0 | 1  | 3  |
| 2  | 3  | 5  | 0  | 0 | 6  | 6  |
| 11 | 14 | 0  | 1  | 0 | 0  | 0  |
| 3  | 9  | 5  | 2  | 0 | 3  | 4  |
| 0  | 2  | 19 | 4  | 0 | 1  | 6  |
| 3  | 0  | 1  | 2  | 0 | 10 | 8  |
| 0  | 2  | 1  | 1  | 0 | 1  | 3  |
| 1  | 2  | 0  | 1  | 0 | 3  | 4  |
| 1  | 5  | 4  | 2  | 0 | 2  | 4  |
| 3  | 5  | 0  | 0  | 0 | 0  | 1  |
| 0  | 9  | 0  | 7  | 0 | 6  | 6  |
| 3  | 0  | 3  | 3  | 0 | 2  | 7  |
| 1  | 6  | 1  | 8  | 0 | 14 | 8  |
| 0  | 2  | 0  | 3  | 0 | 5  | 8  |
| 2  | 2  | 0  | 1  | 0 | 1  | 5  |
| 3  | 4  | 1  | 3  | 0 | 2  | 7  |
| 2  | 0  | 8  | 2  | 4 | 6  | 13 |
| 0  | 0  | 0  | 1  | 0 | 0  | 0  |
| 0  | 6  | 4  | 0  | 0 | 7  | 26 |
| 1  | 4  | 1  | 9  | 0 | 2  | 8  |
| 3  | 2  | 2  | 0  | 0 | 5  | 14 |
| 0  | 2  | 0  | 5  | 1 | 3  | 4  |
| 0  | 5  | 2  | 2  | 0 | 2  | 3  |
| 1  | 3  | 0  | 2  | 1 | 1  | 11 |
| 2  | 2  | 1  | 0  | 0 | 0  | 4  |
| 0  | 3  | 0  | 0  | 0 | 0  | 5  |
| 3  | 4  | 2  | 2  | 0 | 6  | 7  |
| 0  | 6  | 4  | 3  | 0 | 10 | 7  |
| 1  | 1  | 6  | 0  | 0 | 5  | 9  |
| 1  | 1  | 0  | 0  | 0 | 3  | 9  |
| 1  | 6  | 2  | 1  | 0 | 0  | 5  |
| 1  | 3  | 0  | 1  | 0 | 0  | 2  |
| 0  | 1  | 7  | 1  | 0 | 1  | 4  |
| 3  | 4  | 0  | 1  | 0 | 1  | 3  |
| 1  | 0  | 1  | 2  | 0 | 2  | 2  |
| 1  | 4  | 5  | 2  | 0 | 8  | 5  |
| 1  | 4  | 0  | 1  | 0 | 1  | 3  |



|   |   |   |   |   |    |    |
|---|---|---|---|---|----|----|
| 1 | 1 | 1 | 3 | 0 | 3  | 4  |
| 0 | 1 | 1 | 2 | 0 | 3  | 0  |
| 0 | 0 | 0 | 3 | 0 | 6  | 3  |
| 0 | 3 | 0 | 0 | 0 | 1  | 0  |
| 0 | 2 | 1 | 2 | 0 | 7  | 4  |
| 1 | 3 | 2 | 2 | 0 | 2  | 4  |
| 2 | 1 | 3 | 0 | 1 | 4  | 4  |
| 3 | 2 | 2 | 0 | 0 | 3  | 2  |
| 0 | 2 | 4 | 0 | 0 | 2  | 5  |
| 2 | 1 | 0 | 2 | 0 | 2  | 9  |
| 2 | 2 | 2 | 1 | 0 | 1  | 4  |
| 0 | 1 | 0 | 1 | 0 | 0  | 0  |
| 1 | 2 | 2 | 2 | 0 | 1  | 4  |
| 1 | 0 | 0 | 0 | 0 | 4  | 5  |
| 1 | 3 | 4 | 0 | 0 | 1  | 2  |
| 0 | 3 | 0 | 1 | 0 | 0  | 2  |
| 1 | 0 | 0 | 0 | 0 | 0  | 4  |
| 1 | 0 | 0 | 0 | 0 | 12 | 5  |
| 2 | 0 | 0 | 0 | 0 | 1  | 8  |
| 0 | 2 | 0 | 5 | 0 | 0  | 1  |
| 0 | 1 | 1 | 2 | 0 | 3  | 10 |
| 0 | 1 | 1 | 0 | 0 | 1  | 8  |
| 0 | 2 | 3 | 3 | 0 | 0  | 4  |
| 0 | 2 | 0 | 1 | 0 | 0  | 3  |
| 0 | 2 | 1 | 1 | 1 | 0  | 7  |
| 0 | 1 | 0 | 2 | 0 | 3  | 3  |
| 0 | 3 | 3 | 1 | 0 | 4  | 5  |
| 3 | 0 | 1 | 3 | 0 | 1  | 1  |
| 0 | 1 | 1 | 0 | 0 | 0  | 8  |
| 1 | 1 | 2 | 0 | 0 | 1  | 5  |
| 4 | 0 | 1 | 1 | 0 | 0  | 5  |
| 0 | 2 | 2 | 2 | 0 | 7  | 3  |
| 0 | 0 | 1 | 1 | 0 | 0  | 0  |
| 1 | 1 | 0 | 0 | 0 | 1  | 4  |
| 2 | 2 | 1 | 0 | 0 | 3  | 7  |
| 1 | 3 | 2 | 0 | 0 | 0  | 1  |
| 0 | 2 | 0 | 0 | 0 | 0  | 1  |
| 0 | 0 | 0 | 1 | 0 | 0  | 1  |
| 0 | 0 | 0 | 0 | 0 | 0  | 1  |
| 0 | 0 | 4 | 0 | 0 | 0  | 2  |
| 0 | 0 | 1 | 0 | 0 | 1  | 0  |
| 0 | 2 | 1 | 1 | 0 | 2  | 2  |
| 0 | 4 | 2 | 1 | 1 | 5  | 4  |
| 1 | 1 | 1 | 1 | 0 | 5  | 2  |
| 0 | 0 | 0 | 0 | 0 | 0  | 0  |
| 0 | 0 | 0 | 3 | 0 | 2  | 3  |
| 0 | 0 | 0 | 0 | 0 | 4  | 8  |
| 0 | 0 | 0 | 3 | 0 | 1  | 2  |
| 0 | 0 | 0 | 0 | 0 | 0  | 0  |
| 1 | 3 | 1 | 1 | 0 | 1  | 1  |
| 2 | 1 | 4 | 2 | 0 | 2  | 1  |
| 0 | 0 | 0 | 0 | 0 | 0  | 0  |
| 1 | 0 | 0 | 0 | 0 | 0  | 0  |
| 0 | 1 | 1 | 1 | 1 | 1  | 3  |
| 0 | 7 | 1 | 0 | 0 | 5  | 0  |
| 1 | 3 | 1 | 0 | 0 | 4  | 1  |
| 0 | 0 | 0 | 0 | 0 | 0  | 0  |
| 0 | 1 | 3 | 2 | 0 | 0  | 3  |
| 1 | 2 | 0 | 1 | 0 | 4  | 5  |

|   |   |   |   |   |   |   |
|---|---|---|---|---|---|---|
| 0 | 4 | 3 | 1 | 0 | 5 | 1 |
| 0 | 0 | 0 | 0 | 0 | 2 | 3 |
| 0 | 1 | 3 | 1 | 0 | 2 | 2 |
| 3 | 0 | 0 | 3 | 0 | 5 | 1 |
| 0 | 5 | 5 | 1 | 0 | 0 | 1 |
| 0 | 1 | 0 | 1 | 0 | 0 | 1 |
| 0 | 0 | 0 | 2 | 0 | 3 | 2 |
| 0 | 1 | 1 | 1 | 0 | 0 | 2 |
| 0 | 1 | 0 | 0 | 0 | 0 | 0 |
| 1 | 1 | 1 | 1 | 0 | 1 | 7 |
| 0 | 0 | 0 | 1 | 0 | 0 | 0 |
| 0 | 2 | 0 | 2 | 0 | 2 | 0 |
| 2 | 1 | 0 | 1 | 0 | 0 | 4 |
| 0 | 0 | 0 | 0 | 0 | 2 | 0 |
| 0 | 0 | 0 | 0 | 0 | 2 | 2 |
| 2 | 2 | 0 | 0 | 0 | 2 | 1 |
| 0 | 3 | 0 | 0 | 0 | 0 | 0 |
| 1 | 1 | 0 | 1 | 0 | 0 | 3 |
| 1 | 3 | 0 | 0 | 0 | 2 | 2 |
| 0 | 0 | 0 | 0 | 0 | 2 | 5 |
| 0 | 0 | 1 | 3 | 1 | 0 | 2 |
| 0 | 3 | 0 | 1 | 0 | 2 | 1 |
| 0 | 3 | 1 | 1 | 0 | 0 | 2 |
| 0 | 2 | 0 | 2 | 0 | 0 | 0 |
| 0 | 0 | 2 | 1 | 0 | 4 | 3 |
| 1 | 0 | 0 | 1 | 0 | 2 | 0 |
| 0 | 0 | 2 | 2 | 0 | 0 | 3 |
| 0 | 0 | 0 | 3 | 0 | 0 | 1 |
| 1 | 0 | 0 | 0 | 0 | 1 | 1 |
| 0 | 1 | 1 | 7 | 0 | 1 | 1 |
| 4 | 1 | 0 | 0 | 0 | 1 | 1 |
| 0 | 0 | 0 | 1 | 0 | 0 | 2 |
| 1 | 0 | 0 | 0 | 0 | 0 | 0 |
| 0 | 0 | 1 | 3 | 0 | 0 | 2 |
| 2 | 0 | 2 | 1 | 0 | 0 | 3 |
| 0 | 0 | 0 | 1 | 0 | 3 | 0 |
| 0 | 0 | 0 | 0 | 0 | 1 | 0 |
| 0 | 3 | 0 | 1 | 0 | 1 | 0 |
| 0 | 0 | 0 | 1 | 0 | 0 | 0 |
| 1 | 0 | 1 | 0 | 0 | 1 | 2 |
| 0 | 5 | 1 | 1 | 0 | 1 | 2 |
| 0 | 3 | 0 | 0 | 0 | 1 | 3 |
| 0 | 0 | 0 | 0 | 0 | 2 | 1 |
| 0 | 0 | 0 | 0 | 0 | 1 | 0 |
| 0 | 1 | 0 | 1 | 0 | 0 | 0 |
| 0 | 1 | 0 | 2 | 0 | 2 | 1 |
| 0 | 2 | 0 | 4 | 0 | 0 | 2 |
| 0 | 0 | 0 | 1 | 0 | 0 | 0 |
| 0 | 0 | 0 | 0 | 0 | 0 | 0 |
| 2 | 1 | 1 | 0 | 0 | 1 | 2 |
| 0 | 0 | 1 | 0 | 0 | 0 | 0 |
| 0 | 0 | 0 | 1 | 0 | 1 | 0 |
| 0 | 0 | 0 | 0 | 0 | 0 | 0 |
| 0 | 0 | 0 | 0 | 0 | 2 | 2 |
| 1 | 0 | 0 | 1 | 0 | 0 | 0 |
| 0 | 4 | 0 | 4 | 0 | 3 | 1 |
| 1 | 0 | 1 | 3 | 0 | 1 | 4 |
| 0 | 1 | 1 | 0 | 0 | 3 | 2 |
| 0 | 3 | 0 | 1 | 0 | 1 | 4 |

|   |   |   |   |   |   |   |
|---|---|---|---|---|---|---|
| 0 | 1 | 0 | 2 | 0 | 0 | 3 |
| 1 | 0 | 0 | 1 | 0 | 0 | 1 |
| 0 | 0 | 0 | 4 | 0 | 3 | 2 |
| 0 | 0 | 1 | 2 | 0 | 1 | 0 |
| 0 | 2 | 2 | 0 | 0 | 0 | 1 |
| 0 | 0 | 0 | 0 | 0 | 0 | 0 |
| 0 | 0 | 0 | 0 | 0 | 1 | 0 |
| 0 | 1 | 0 | 2 | 0 | 0 | 0 |
| 0 | 0 | 0 | 0 | 0 | 1 | 2 |
| 0 | 0 | 1 | 0 | 0 | 1 | 1 |
| 0 | 1 | 1 | 0 | 0 | 0 | 0 |
| 2 | 0 | 2 | 1 | 0 | 0 | 2 |
| 1 | 2 | 1 | 0 | 0 | 3 | 1 |
| 0 | 1 | 1 | 1 | 0 | 2 | 1 |
| 0 | 2 | 1 | 0 | 0 | 2 | 0 |
| 0 | 1 | 0 | 0 | 0 | 1 | 4 |
| 0 | 0 | 1 | 0 | 0 | 0 | 0 |
| 0 | 0 | 1 | 0 | 0 | 0 | 1 |
| 0 | 0 | 0 | 0 | 0 | 0 | 2 |
| 0 | 0 | 1 | 1 | 0 | 1 | 1 |
| 0 | 2 | 1 | 0 | 0 | 0 | 0 |
| 1 | 3 | 1 | 0 | 0 | 3 | 1 |
| 0 | 2 | 1 | 1 | 0 | 1 | 2 |
| 0 | 0 | 0 | 0 | 0 | 0 | 1 |
| 1 | 0 | 0 | 0 | 0 | 0 | 0 |
| 0 | 0 | 0 | 1 | 0 | 0 | 0 |
| 1 | 1 | 1 | 0 | 0 | 0 | 2 |
| 1 | 1 | 2 | 0 | 0 | 1 | 0 |
| 1 | 0 | 2 | 1 | 0 | 0 | 1 |
| 0 | 1 | 0 | 0 | 0 | 0 | 0 |
| 2 | 1 | 0 | 0 | 0 | 2 | 0 |
| 2 | 0 | 2 | 0 | 0 | 1 | 2 |
| 1 | 0 | 1 | 0 | 0 | 0 | 0 |
| 1 | 2 | 0 | 1 | 0 | 0 | 0 |
| 0 | 0 | 0 | 3 | 0 | 0 | 0 |
| 0 | 0 | 0 | 0 | 0 | 1 | 0 |
| 0 | 1 | 2 | 0 | 0 | 2 | 3 |
| 0 | 0 | 1 | 0 | 0 | 1 | 1 |

|        |         |        |        |       |        |        |
|--------|---------|--------|--------|-------|--------|--------|
| 0.27   | 0.77    | 0.85   | 0.91   | 0.31  | 0.22   | 0.11   |
| 23     | 13      | 10     | 7      | 16    | 19     | 22     |
| 1      | 1       | 1      | 1      | 1     | 1      | 1      |
| 64     | 65      | 66     | 67     | 68    | 69     | 70     |
| 37     | 38      | 1      | 2      | 3     | 4      | 5      |
| G_6    | G_7     | A_10   | A_12   | A_18  | A_3    | A_5    |
| CHR_NP | CHR_NP  | CHR_P  | CHR_P  | CHR_P | CHR_P  | CHR_P  |
| 488065 | 1421920 | 492624 | 721119 | 27468 | 816795 | 972175 |
| CHR_NP | CHR_NP  | CHR_P  | CHR_P  | CHR_P | CHR_P  | CHR_P  |
| 196834 | 399578  | 190797 | 261344 | 6469  | 132111 | 198821 |
| 33091  | 131009  | 7668   | 13505  | 8375  | 34328  | 58994  |
| 30921  | 36819   | 10054  | 7691   | 750   | 35614  | 51330  |
| 48784  | 152679  | 37879  | 14227  | 1228  | 168094 | 97543  |
| 30262  | 81663   | 47947  | 12291  | 536   | 64203  | 87260  |

|       |        |       |       |      |       |       |
|-------|--------|-------|-------|------|-------|-------|
| 10574 | 100931 | 5499  | 86372 | 452  | 20677 | 38724 |
| 29185 | 86225  | 4865  | 15656 | 647  | 22001 | 51972 |
| 1738  | 15269  | 4480  | 24861 | 117  | 4457  | 7468  |
| 8204  | 87617  | 5810  | 49674 | 88   | 6761  | 18115 |
| 7982  | 44347  | 28115 | 80322 | 1803 | 36876 | 40293 |
| 9832  | 27797  | 31440 | 24136 | 674  | 26458 | 23921 |
| 6971  | 19045  | 8308  | 8992  | 204  | 26259 | 32101 |
| 7614  | 28174  | 9824  | 5991  | 139  | 30575 | 25249 |
| 7585  | 22198  | 7741  | 9409  | 238  | 38899 | 20915 |
| 1801  | 11236  | 11411 | 3972  | 189  | 9342  | 9807  |
| 3840  | 4218   | 5821  | 1658  | 7    | 2939  | 3906  |
| 932   | 9345   | 1238  | 4083  | 91   | 5496  | 12964 |
| 1264  | 4671   | 5981  | 3990  | 345  | 13701 | 17197 |
| 2901  | 11037  | 1600  | 9484  | 119  | 2645  | 8526  |
| 2305  | 6613   | 3207  | 4091  | 768  | 2897  | 7001  |
| 1506  | 4148   | 2184  | 2473  | 149  | 3338  | 6047  |
| 2124  | 7540   | 5042  | 5947  | 167  | 10042 | 10806 |
| 1093  | 4874   | 1341  | 3135  | 126  | 869   | 3590  |
| 655   | 4418   | 858   | 3250  | 109  | 2006  | 9031  |
| 999   | 10956  | 1605  | 2971  | 300  | 1547  | 5495  |
| 997   | 4583   | 1511  | 4140  | 22   | 1660  | 3495  |
| 1962  | 5290   | 5431  | 1563  | 58   | 9033  | 4396  |
| 1329  | 1938   | 6034  | 2972  | 204  | 2727  | 3487  |
| 1244  | 5804   | 1572  | 1962  | 124  | 6624  | 5075  |
| 1864  | 4373   | 1013  | 2288  | 86   | 1596  | 2878  |
| 1624  | 4144   | 838   | 1545  | 37   | 2190  | 5104  |
| 2848  | 6975   | 2236  | 513   | 18   | 9944  | 5368  |
| 789   | 3611   | 544   | 3180  | 9    | 1671  | 3742  |
| 342   | 591    | 715   | 2604  | 32   | 547   | 1978  |
| 1134  | 5192   | 1112  | 1315  | 86   | 4632  | 3492  |
| 1422  | 4545   | 796   | 2471  | 193  | 15156 | 5512  |
| 686   | 4225   | 1073  | 3383  | 483  | 2811  | 3748  |
| 942   | 4989   | 1075  | 3737  | 399  | 1795  | 3909  |
| 1021  | 1788   | 178   | 479   | 145  | 911   | 2595  |
| 2366  | 3556   | 2757  | 470   | 12   | 4393  | 2097  |
| 348   | 817    | 563   | 718   | 114  | 3445  | 5257  |
| 928   | 1980   | 2074  | 344   | 10   | 1815  | 2919  |
| 794   | 2672   | 607   | 1017  | 63   | 3797  | 3856  |
| 210   | 1372   | 613   | 909   | 79   | 711   | 712   |
| 514   | 1473   | 974   | 1334  | 103  | 1435  | 2476  |
| 731   | 1358   | 637   | 750   | 34   | 1382  | 3150  |
| 937   | 1954   | 201   | 1003  | 16   | 858   | 1667  |
| 687   | 1241   | 1701  | 515   | 24   | 1322  | 2479  |
| 187   | 702    | 277   | 124   | 1    | 981   | 727   |
| 124   | 447    | 1549  | 350   | 8    | 45    | 410   |
| 477   | 270    | 91    | 664   | 14   | 1172  | 1836  |
| 203   | 826    | 167   | 509   | 31   | 663   | 1584  |
| 394   | 1111   | 255   | 1145  | 63   | 1159  | 1265  |
| 107   | 509    | 2169  | 382   | 52   | 524   | 2087  |
| 663   | 2020   | 258   | 382   | 0    | 12    | 46    |
| 42    | 155    | 358   | 255   | 3    | 43    | 126   |
| 409   | 1731   | 103   | 890   | 24   | 939   | 1409  |
| 179   | 781    | 256   | 247   | 7    | 368   | 1337  |
| 378   | 776    | 421   | 409   | 37   | 823   | 1500  |
| 576   | 556    | 317   | 147   | 66   | 925   | 1334  |
| 295   | 481    | 231   | 578   | 16   | 1649  | 1798  |
| 176   | 567    | 569   | 275   | 6    | 243   | 634   |
| 40    | 372    | 31    | 792   | 9    | 94    | 207   |
| 14    | 80     | 5     | 61    | 1    | 7     | 37    |

|     |      |      |     |     |      |      |
|-----|------|------|-----|-----|------|------|
| 498 | 875  | 1075 | 198 | 31  | 2408 | 869  |
| 222 | 1097 | 173  | 747 | 19  | 1011 | 1035 |
| 167 | 346  | 118  | 637 | 3   | 199  | 376  |
| 107 | 752  | 287  | 330 | 6   | 544  | 646  |
| 70  | 433  | 155  | 307 | 8   | 420  | 957  |
| 208 | 634  | 130  | 888 | 111 | 387  | 591  |
| 275 | 313  | 86   | 309 | 21  | 537  | 548  |
| 156 | 327  | 426  | 289 | 9   | 1862 | 954  |
| 98  | 531  | 270  | 464 | 16  | 291  | 468  |
| 175 | 827  | 407  | 527 | 8   | 301  | 336  |
| 196 | 495  | 60   | 244 | 7   | 228  | 798  |
| 225 | 116  | 206  | 179 | 5   | 741  | 1033 |
| 373 | 1134 | 187  | 288 | 0   | 16   | 43   |
| 417 | 650  | 41   | 157 | 107 | 109  | 254  |
| 252 | 356  | 432  | 49  | 2   | 659  | 614  |
| 80  | 141  | 23   | 231 | 15  | 347  | 262  |
| 122 | 698  | 120  | 385 | 4   | 658  | 949  |
| 108 | 173  | 352  | 111 | 0   | 142  | 322  |
| 218 | 310  | 57   | 88  | 28  | 1066 | 638  |
| 61  | 54   | 45   | 423 | 3   | 33   | 138  |
| 101 | 502  | 63   | 239 | 13  | 98   | 367  |
| 75  | 150  | 92   | 162 | 0   | 189  | 346  |
| 160 | 189  | 70   | 116 | 10  | 367  | 406  |
| 44  | 574  | 148  | 402 | 1   | 283  | 467  |
| 78  | 328  | 71   | 273 | 5   | 282  | 579  |
| 171 | 260  | 183  | 38  | 6   | 413  | 439  |
| 78  | 253  | 282  | 43  | 6   | 184  | 232  |
| 10  | 41   | 6    | 17  | 0   | 19   | 9    |
| 99  | 174  | 89   | 111 | 1   | 91   | 322  |
| 67  | 331  | 40   | 269 | 6   | 80   | 215  |
| 25  | 121  | 36   | 159 | 0   | 43   | 107  |
| 31  | 121  | 90   | 97  | 4   | 111  | 350  |
| 102 | 123  | 92   | 26  | 6   | 148  | 215  |
| 95  | 138  | 241  | 58  | 11  | 245  | 323  |
| 115 | 210  | 120  | 48  | 15  | 343  | 406  |
| 22  | 199  | 19   | 93  | 0   | 39   | 66   |
| 32  | 99   | 36   | 238 | 2   | 548  | 373  |
| 89  | 352  | 8    | 104 | 1   | 93   | 182  |
| 170 | 165  | 85   | 79  | 1   | 201  | 227  |
| 80  | 228  | 108  | 65  | 19  | 200  | 306  |
| 45  | 225  | 27   | 287 | 4   | 147  | 300  |
| 24  | 185  | 268  | 247 | 3   | 122  | 165  |
| 58  | 71   | 18   | 66  | 8   | 112  | 234  |
| 45  | 201  | 12   | 86  | 7   | 85   | 159  |
| 43  | 182  | 31   | 144 | 0   | 154  | 203  |
| 65  | 341  | 80   | 93  | 0   | 81   | 133  |
| 29  | 154  | 126  | 57  | 4   | 67   | 237  |
| 51  | 102  | 98   | 48  | 3   | 187  | 260  |
| 40  | 98   | 46   | 80  | 2   | 200  | 293  |
| 38  | 314  | 42   | 126 | 7   | 230  | 314  |
| 62  | 64   | 21   | 14  | 3   | 50   | 146  |
| 76  | 195  | 101  | 42  | 7   | 282  | 229  |
| 29  | 452  | 154  | 50  | 3   | 81   | 158  |
| 55  | 104  | 29   | 101 | 1   | 123  | 220  |
| 55  | 104  | 29   | 101 | 1   | 123  | 220  |
| 45  | 87   | 37   | 116 | 4   | 211  | 195  |
| 35  | 136  | 49   | 271 | 2   | 81   | 98   |
| 18  | 66   | 95   | 71  | 3   | 77   | 185  |
| 42  | 32   | 22   | 69  | 1   | 15   | 72   |

|     |     |     |     |   |     |     |
|-----|-----|-----|-----|---|-----|-----|
| 15  | 69  | 101 | 55  | 5 | 27  | 111 |
| 9   | 19  | 1   | 3   | 0 | 2   | 5   |
| 66  | 62  | 19  | 30  | 2 | 174 | 222 |
| 51  | 124 | 6   | 72  | 2 | 45  | 71  |
| 34  | 39  | 30  | 34  | 0 | 68  | 115 |
| 10  | 22  | 22  | 32  | 5 | 170 | 162 |
| 29  | 88  | 65  | 4   | 3 | 71  | 160 |
| 137 | 304 | 3   | 20  | 1 | 4   | 5   |
| 42  | 51  | 78  | 48  | 2 | 74  | 221 |
| 25  | 86  | 23  | 60  | 2 | 36  | 85  |
| 8   | 30  | 11  | 46  | 4 | 84  | 115 |
| 25  | 67  | 16  | 150 | 0 | 21  | 129 |
| 13  | 61  | 54  | 22  | 0 | 29  | 98  |
| 26  | 161 | 126 | 43  | 0 | 21  | 29  |
| 25  | 65  | 31  | 88  | 0 | 89  | 82  |
| 27  | 68  | 21  | 34  | 1 | 54  | 94  |
| 26  | 86  | 13  | 26  | 2 | 66  | 85  |
| 38  | 97  | 50  | 22  | 1 | 12  | 25  |
| 23  | 58  | 11  | 65  | 1 | 42  | 52  |
| 32  | 46  | 122 | 13  | 0 | 187 | 93  |
| 46  | 60  | 21  | 11  | 1 | 59  | 154 |
| 4   | 23  | 1   | 28  | 0 | 9   | 9   |
| 50  | 73  | 18  | 30  | 0 | 220 | 73  |
| 22  | 38  | 23  | 15  | 0 | 82  | 196 |
| 28  | 76  | 10  | 20  | 1 | 21  | 80  |
| 40  | 104 | 23  | 38  | 0 | 128 | 105 |
| 22  | 56  | 17  | 32  | 2 | 273 | 128 |
| 13  | 39  | 37  | 51  | 1 | 5   | 27  |
| 23  | 117 | 27  | 57  | 0 | 96  | 108 |
| 10  | 9   | 44  | 49  | 0 | 4   | 35  |
| 19  | 43  | 15  | 11  | 0 | 33  | 99  |
| 20  | 15  | 142 | 4   | 0 | 13  | 52  |
| 27  | 56  | 8   | 41  | 2 | 120 | 58  |
| 21  | 94  | 23  | 15  | 4 | 77  | 44  |
| 9   | 10  | 13  | 37  | 1 | 75  | 39  |
| 10  | 36  | 12  | 32  | 0 | 48  | 95  |
| 25  | 107 | 44  | 31  | 1 | 23  | 22  |
| 2   | 8   | 1   | 4   | 0 | 4   | 7   |
| 16  | 20  | 5   | 17  | 1 | 43  | 74  |
| 25  | 62  | 15  | 10  | 2 | 63  | 46  |
| 9   | 16  | 11  | 38  | 0 | 17  | 52  |
| 8   | 22  | 12  | 14  | 1 | 11  | 68  |
| 41  | 47  | 30  | 16  | 2 | 82  | 51  |
| 8   | 34  | 10  | 11  | 0 | 48  | 65  |
| 64  | 25  | 6   | 238 | 2 | 14  | 14  |
| 10  | 21  | 5   | 18  | 1 | 2   | 10  |
| 13  | 33  | 45  | 43  | 1 | 65  | 68  |
| 13  | 18  | 8   | 6   | 0 | 17  | 25  |
| 24  | 65  | 61  | 54  | 0 | 8   | 35  |
| 19  | 29  | 21  | 15  | 2 | 28  | 32  |
| 4   | 39  | 13  | 15  | 0 | 16  | 31  |
| 7   | 20  | 6   | 14  | 1 | 2   | 46  |
| 19  | 30  | 16  | 9   | 0 | 53  | 60  |
| 10  | 11  | 4   | 45  | 0 | 83  | 96  |
| 13  | 42  | 16  | 22  | 1 | 23  | 46  |
| 5   | 16  | 6   | 56  | 2 | 24  | 34  |
| 21  | 8   | 1   | 19  | 0 | 58  | 56  |
| 30  | 1   | 14  | 0   | 1 | 41  | 47  |
| 10  | 41  | 11  | 20  | 0 | 13  | 22  |

|    |     |    |    |   |     |     |
|----|-----|----|----|---|-----|-----|
| 15 | 4   | 14 | 28 | 0 | 30  | 76  |
| 10 | 52  | 11 | 67 | 1 | 30  | 28  |
| 13 | 10  | 50 | 28 | 5 | 48  | 48  |
| 20 | 27  | 27 | 17 | 0 | 49  | 55  |
| 10 | 41  | 9  | 17 | 0 | 13  | 21  |
| 4  | 4   | 14 | 25 | 0 | 106 | 112 |
| 20 | 26  | 10 | 8  | 0 | 23  | 30  |
| 14 | 46  | 6  | 4  | 0 | 2   | 12  |
| 91 | 120 | 0  | 99 | 2 | 16  | 29  |
| 2  | 28  | 10 | 32 | 1 | 5   | 7   |
| 2  | 7   | 9  | 17 | 1 | 52  | 80  |
| 23 | 29  | 29 | 4  | 1 | 36  | 75  |
| 16 | 49  | 7  | 38 | 0 | 17  | 21  |
| 27 | 68  | 4  | 4  | 2 | 25  | 35  |
| 0  | 6   | 36 | 7  | 0 | 1   | 9   |
| 17 | 59  | 27 | 15 | 0 | 66  | 46  |
| 3  | 15  | 5  | 22 | 1 | 21  | 50  |
| 23 | 30  | 4  | 13 | 0 | 17  | 64  |
| 20 | 34  | 5  | 0  | 0 | 24  | 50  |
| 32 | 75  | 29 | 21 | 0 | 11  | 32  |
| 9  | 27  | 17 | 4  | 1 | 96  | 44  |
| 9  | 14  | 12 | 6  | 0 | 2   | 36  |
| 6  | 29  | 8  | 34 | 1 | 49  | 37  |
| 24 | 6   | 4  | 19 | 0 | 16  | 26  |
| 31 | 43  | 4  | 11 | 0 | 38  | 30  |
| 9  | 22  | 11 | 10 | 0 | 52  | 60  |
| 5  | 9   | 11 | 11 | 0 | 15  | 46  |
| 10 | 39  | 61 | 30 | 0 | 101 | 29  |
| 5  | 12  | 8  | 9  | 1 | 64  | 63  |
| 6  | 17  | 1  | 6  | 0 | 8   | 41  |
| 4  | 7   | 3  | 20 | 0 | 22  | 32  |
| 12 | 19  | 20 | 5  | 0 | 65  | 44  |
| 5  | 25  | 24 | 8  | 0 | 4   | 9   |
| 12 | 21  | 2  | 3  | 1 | 9   | 25  |
| 13 | 31  | 2  | 4  | 0 | 4   | 9   |
| 7  | 30  | 13 | 3  | 2 | 0   | 23  |
| 0  | 2   | 2  | 0  | 0 | 1   | 0   |
| 4  | 49  | 1  | 4  | 0 | 28  | 30  |
| 32 | 143 | 0  | 17 | 1 | 1   | 7   |
| 10 | 20  | 4  | 27 | 0 | 22  | 29  |
| 5  | 16  | 2  | 18 | 0 | 14  | 35  |
| 8  | 17  | 14 | 30 | 1 | 38  | 26  |
| 10 | 6   | 2  | 11 | 0 | 43  | 66  |
| 11 | 14  | 5  | 3  | 0 | 8   | 14  |
| 13 | 32  | 13 | 4  | 0 | 40  | 25  |
| 8  | 40  | 14 | 6  | 0 | 16  | 18  |
| 9  | 11  | 6  | 4  | 0 | 43  | 39  |
| 4  | 19  | 3  | 27 | 3 | 20  | 16  |
| 2  | 9   | 2  | 21 | 0 | 3   | 11  |
| 4  | 17  | 6  | 8  | 2 | 35  | 16  |
| 0  | 4   | 0  | 8  | 0 | 2   | 1   |
| 9  | 5   | 6  | 7  | 0 | 9   | 16  |
| 7  | 28  | 5  | 5  | 0 | 1   | 8   |
| 10 | 16  | 5  | 12 | 0 | 23  | 17  |
| 5  | 5   | 3  | 3  | 0 | 9   | 13  |
| 2  | 6   | 7  | 5  | 0 | 8   | 17  |
| 5  | 14  | 4  | 5  | 0 | 4   | 16  |
| 16 | 17  | 1  | 3  | 0 | 10  | 20  |
| 5  | 4   | 5  | 13 | 1 | 27  | 42  |

|    |    |    |    |   |    |    |
|----|----|----|----|---|----|----|
| 1  | 9  | 1  | 21 | 0 | 5  | 8  |
| 2  | 20 | 2  | 14 | 0 | 6  | 18 |
| 5  | 13 | 3  | 12 | 0 | 3  | 14 |
| 5  | 13 | 3  | 12 | 0 | 3  | 14 |
| 10 | 1  | 2  | 4  | 0 | 25 | 19 |
| 3  | 18 | 7  | 6  | 0 | 44 | 20 |
| 11 | 19 | 1  | 2  | 0 | 11 | 9  |
| 7  | 2  | 1  | 4  | 0 | 16 | 20 |
| 4  | 13 | 0  | 4  | 0 | 5  | 12 |
| 4  | 10 | 6  | 3  | 0 | 4  | 23 |
| 4  | 12 | 17 | 10 | 0 | 6  | 22 |
| 6  | 34 | 9  | 9  | 0 | 14 | 9  |
| 3  | 9  | 4  | 1  | 0 | 5  | 3  |
| 1  | 10 | 3  | 5  | 1 | 5  | 23 |
| 2  | 24 | 2  | 1  | 0 | 2  | 6  |
| 10 | 11 | 12 | 5  | 0 | 15 | 19 |
| 4  | 13 | 2  | 19 | 1 | 14 | 11 |
| 1  | 2  | 0  | 3  | 0 | 0  | 1  |
| 5  | 9  | 7  | 10 | 0 | 27 | 24 |
| 4  | 17 | 3  | 10 | 0 | 7  | 28 |
| 7  | 13 | 1  | 1  | 0 | 10 | 14 |
| 7  | 7  | 6  | 4  | 0 | 43 | 25 |
| 4  | 17 | 3  | 10 | 0 | 4  | 24 |
| 8  | 5  | 14 | 2  | 1 | 7  | 20 |
| 5  | 7  | 9  | 5  | 0 | 17 | 20 |
| 1  | 9  | 0  | 13 | 0 | 7  | 13 |
| 1  | 10 | 11 | 1  | 0 | 17 | 4  |
| 0  | 0  | 0  | 0  | 0 | 0  | 1  |
| 4  | 6  | 7  | 1  | 0 | 3  | 6  |
| 8  | 8  | 13 | 3  | 1 | 39 | 15 |
| 6  | 11 | 6  | 5  | 0 | 51 | 18 |
| 1  | 1  | 4  | 3  | 0 | 20 | 22 |
| 6  | 23 | 7  | 6  | 0 | 11 | 14 |
| 1  | 0  | 2  | 0  | 0 | 2  | 1  |
| 1  | 9  | 4  | 6  | 0 | 51 | 31 |
| 1  | 13 | 7  | 7  | 0 | 3  | 12 |
| 0  | 0  | 1  | 4  | 0 | 69 | 1  |
| 5  | 13 | 6  | 1  | 1 | 49 | 8  |
| 5  | 6  | 7  | 6  | 0 | 9  | 23 |
| 2  | 8  | 0  | 4  | 1 | 15 | 9  |
| 0  | 1  | 1  | 7  | 0 | 15 | 13 |
| 3  | 11 | 6  | 3  | 0 | 16 | 8  |
| 3  | 0  | 1  | 5  | 0 | 16 | 30 |
| 0  | 13 | 2  | 4  | 0 | 1  | 5  |
| 3  | 5  | 2  | 6  | 1 | 20 | 10 |
| 7  | 8  | 2  | 2  | 0 | 5  | 11 |
| 1  | 13 | 6  | 5  | 0 | 2  | 11 |
| 2  | 1  | 2  | 8  | 0 | 12 | 17 |
| 0  | 8  | 3  | 5  | 0 | 0  | 4  |
| 0  | 2  | 0  | 4  | 0 | 9  | 4  |
| 4  | 24 | 0  | 2  | 1 | 1  | 3  |
| 7  | 4  | 1  | 1  | 0 | 20 | 15 |
| 6  | 6  | 2  | 12 | 0 | 5  | 9  |
| 3  | 1  | 27 | 0  | 0 | 2  | 7  |
| 2  | 1  | 7  | 6  | 0 | 8  | 13 |
| 1  | 7  | 3  | 9  | 0 | 7  | 7  |
| 5  | 14 | 4  | 1  | 1 | 15 | 11 |
| 5  | 5  | 1  | 5  | 0 | 4  | 5  |
| 2  | 5  | 2  | 6  | 0 | 1  | 4  |



|    |    |    |    |   |    |    |
|----|----|----|----|---|----|----|
| 7  | 1  | 2  | 13 | 0 | 9  | 17 |
| 5  | 1  | 0  | 1  | 0 | 3  | 8  |
| 1  | 7  | 2  | 4  | 0 | 17 | 18 |
| 0  | 2  | 4  | 0  | 0 | 1  | 10 |
| 2  | 4  | 15 | 4  | 0 | 17 | 7  |
| 4  | 6  | 9  | 3  | 0 | 8  | 4  |
| 5  | 3  | 1  | 0  | 0 | 11 | 5  |
| 2  | 0  | 1  | 6  | 1 | 14 | 11 |
| 1  | 2  | 6  | 2  | 0 | 4  | 10 |
| 2  | 4  | 3  | 5  | 0 | 4  | 21 |
| 3  | 5  | 0  | 0  | 0 | 3  | 7  |
| 3  | 12 | 3  | 2  | 0 | 6  | 6  |
| 1  | 0  | 15 | 4  | 0 | 2  | 6  |
| 2  | 4  | 0  | 2  | 0 | 0  | 1  |
| 2  | 10 | 2  | 4  | 2 | 10 | 12 |
| 1  | 7  | 1  | 4  | 1 | 15 | 9  |
| 3  | 9  | 1  | 8  | 2 | 14 | 9  |
| 3  | 1  | 6  | 2  | 0 | 3  | 7  |
| 0  | 5  | 3  | 2  | 0 | 2  | 5  |
| 7  | 5  | 1  | 1  | 0 | 7  | 6  |
| 4  | 2  | 3  | 1  | 0 | 1  | 3  |
| 0  | 1  | 0  | 6  | 0 | 2  | 7  |
| 5  | 1  | 3  | 1  | 0 | 4  | 11 |
| 2  | 0  | 0  | 2  | 0 | 4  | 6  |
| 0  | 2  | 0  | 0  | 0 | 3  | 7  |
| 1  | 1  | 0  | 4  | 0 | 10 | 16 |
| 1  | 3  | 0  | 11 | 0 | 8  | 7  |
| 3  | 2  | 0  | 5  | 0 | 12 | 6  |
| 2  | 10 | 2  | 10 | 0 | 14 | 9  |
| 1  | 5  | 0  | 3  | 0 | 10 | 7  |
| 0  | 3  | 6  | 0  | 0 | 4  | 16 |
| 2  | 3  | 5  | 0  | 0 | 14 | 6  |
| 0  | 1  | 2  | 6  | 0 | 0  | 1  |
| 3  | 2  | 0  | 1  | 0 | 7  | 9  |
| 0  | 4  | 2  | 7  | 1 | 0  | 5  |
| 2  | 10 | 0  | 2  | 0 | 1  | 3  |
| 0  | 2  | 2  | 1  | 0 | 1  | 3  |
| 2  | 3  | 5  | 0  | 0 | 6  | 6  |
| 11 | 14 | 0  | 1  | 0 | 0  | 0  |
| 3  | 9  | 5  | 2  | 0 | 3  | 4  |
| 0  | 2  | 19 | 4  | 0 | 1  | 6  |
| 3  | 0  | 1  | 2  | 0 | 10 | 8  |
| 0  | 2  | 1  | 1  | 0 | 1  | 3  |
| 1  | 2  | 0  | 1  | 0 | 3  | 4  |
| 1  | 5  | 4  | 2  | 0 | 2  | 4  |
| 3  | 5  | 0  | 0  | 0 | 0  | 1  |
| 0  | 9  | 0  | 7  | 0 | 6  | 6  |
| 3  | 0  | 3  | 3  | 0 | 2  | 7  |
| 1  | 6  | 1  | 8  | 0 | 14 | 8  |
| 0  | 2  | 0  | 3  | 0 | 5  | 8  |
| 2  | 2  | 0  | 1  | 0 | 1  | 5  |
| 3  | 4  | 1  | 3  | 0 | 2  | 7  |
| 2  | 0  | 8  | 2  | 4 | 6  | 13 |
| 0  | 0  | 0  | 1  | 0 | 0  | 0  |
| 0  | 6  | 4  | 0  | 0 | 7  | 26 |
| 1  | 4  | 1  | 9  | 0 | 2  | 8  |
| 3  | 2  | 2  | 0  | 0 | 5  | 14 |
| 0  | 2  | 0  | 5  | 1 | 3  | 4  |
| 0  | 5  | 2  | 2  | 0 | 2  | 3  |

|   |   |   |   |   |    |    |
|---|---|---|---|---|----|----|
| 1 | 3 | 0 | 2 | 1 | 1  | 11 |
| 2 | 2 | 1 | 0 | 0 | 0  | 4  |
| 0 | 3 | 0 | 0 | 0 | 0  | 5  |
| 3 | 4 | 2 | 2 | 0 | 6  | 7  |
| 0 | 6 | 4 | 3 | 0 | 10 | 7  |
| 1 | 1 | 6 | 0 | 0 | 5  | 9  |
| 1 | 1 | 0 | 0 | 0 | 3  | 9  |
| 1 | 6 | 2 | 1 | 0 | 0  | 5  |
| 1 | 3 | 0 | 1 | 0 | 0  | 2  |
| 0 | 1 | 7 | 1 | 0 | 1  | 4  |
| 3 | 4 | 0 | 1 | 0 | 1  | 3  |
| 1 | 0 | 1 | 2 | 0 | 2  | 2  |
| 1 | 4 | 5 | 2 | 0 | 8  | 5  |
| 1 | 4 | 0 | 1 | 0 | 1  | 3  |
| 1 | 1 | 1 | 3 | 0 | 3  | 4  |
| 0 | 1 | 1 | 2 | 0 | 3  | 0  |
| 0 | 0 | 0 | 3 | 0 | 6  | 3  |
| 0 | 3 | 0 | 0 | 0 | 1  | 0  |
| 0 | 2 | 1 | 2 | 0 | 7  | 4  |
| 1 | 3 | 2 | 2 | 0 | 2  | 4  |
| 2 | 1 | 3 | 0 | 1 | 4  | 4  |
| 3 | 2 | 2 | 0 | 0 | 3  | 2  |
| 0 | 2 | 4 | 0 | 0 | 2  | 5  |
| 2 | 1 | 0 | 2 | 0 | 2  | 9  |
| 2 | 2 | 2 | 1 | 0 | 1  | 4  |
| 0 | 1 | 0 | 1 | 0 | 0  | 0  |
| 1 | 2 | 2 | 2 | 0 | 1  | 4  |
| 1 | 0 | 0 | 0 | 0 | 4  | 5  |
| 1 | 3 | 4 | 0 | 0 | 1  | 2  |
| 0 | 3 | 0 | 1 | 0 | 0  | 2  |
| 1 | 0 | 0 | 0 | 0 | 0  | 4  |
| 1 | 0 | 0 | 0 | 0 | 12 | 5  |
| 2 | 0 | 0 | 0 | 0 | 1  | 8  |
| 0 | 2 | 0 | 5 | 0 | 0  | 1  |
| 0 | 1 | 1 | 2 | 0 | 3  | 10 |
| 0 | 1 | 1 | 0 | 0 | 1  | 8  |
| 0 | 2 | 3 | 3 | 0 | 0  | 4  |
| 0 | 2 | 0 | 1 | 0 | 0  | 3  |
| 0 | 2 | 1 | 1 | 1 | 0  | 7  |
| 0 | 1 | 0 | 2 | 0 | 3  | 3  |
| 0 | 3 | 3 | 1 | 0 | 4  | 5  |
| 3 | 0 | 1 | 3 | 0 | 1  | 1  |
| 0 | 1 | 1 | 0 | 0 | 0  | 8  |
| 1 | 1 | 2 | 0 | 0 | 1  | 5  |
| 4 | 0 | 1 | 1 | 0 | 0  | 5  |
| 0 | 2 | 2 | 2 | 0 | 7  | 3  |
| 0 | 0 | 1 | 1 | 0 | 0  | 0  |
| 1 | 1 | 0 | 0 | 0 | 1  | 4  |
| 2 | 2 | 1 | 0 | 0 | 3  | 7  |
| 1 | 3 | 2 | 0 | 0 | 0  | 1  |
| 0 | 2 | 0 | 0 | 0 | 0  | 1  |
| 0 | 0 | 0 | 1 | 0 | 0  | 1  |
| 0 | 0 | 0 | 0 | 0 | 0  | 1  |
| 0 | 0 | 4 | 0 | 0 | 0  | 2  |
| 0 | 0 | 1 | 0 | 0 | 1  | 0  |
| 0 | 2 | 1 | 1 | 0 | 2  | 2  |
| 0 | 4 | 2 | 1 | 1 | 5  | 4  |
| 1 | 1 | 1 | 1 | 0 | 5  | 2  |
| 0 | 0 | 0 | 0 | 0 | 0  | 0  |

|   |   |   |   |   |   |   |
|---|---|---|---|---|---|---|
| 0 | 0 | 0 | 3 | 0 | 2 | 3 |
| 0 | 0 | 0 | 0 | 0 | 4 | 8 |
| 0 | 0 | 0 | 3 | 0 | 1 | 2 |
| 0 | 0 | 0 | 0 | 0 | 0 | 0 |
| 1 | 3 | 1 | 1 | 0 | 1 | 1 |
| 2 | 1 | 4 | 2 | 0 | 2 | 1 |
| 0 | 0 | 0 | 0 | 0 | 0 | 0 |
| 1 | 0 | 0 | 0 | 0 | 0 | 0 |
| 0 | 1 | 1 | 1 | 1 | 1 | 3 |
| 0 | 7 | 1 | 0 | 0 | 5 | 0 |
| 1 | 3 | 1 | 0 | 0 | 4 | 1 |
| 0 | 0 | 0 | 0 | 0 | 0 | 0 |
| 0 | 1 | 3 | 2 | 0 | 0 | 3 |
| 1 | 2 | 0 | 1 | 0 | 4 | 5 |
| 0 | 4 | 3 | 1 | 0 | 5 | 1 |
| 0 | 0 | 0 | 0 | 0 | 2 | 3 |
| 0 | 1 | 3 | 1 | 0 | 2 | 2 |
| 3 | 0 | 0 | 3 | 0 | 5 | 1 |
| 0 | 5 | 5 | 1 | 0 | 0 | 1 |
| 0 | 1 | 0 | 1 | 0 | 0 | 1 |
| 0 | 0 | 0 | 2 | 0 | 3 | 2 |
| 0 | 1 | 1 | 1 | 0 | 0 | 2 |
| 0 | 1 | 0 | 0 | 0 | 0 | 0 |
| 1 | 1 | 1 | 1 | 0 | 1 | 7 |
| 0 | 0 | 0 | 1 | 0 | 0 | 0 |
| 0 | 2 | 0 | 2 | 0 | 2 | 0 |
| 2 | 1 | 0 | 1 | 0 | 0 | 4 |
| 0 | 0 | 0 | 0 | 0 | 2 | 0 |
| 0 | 0 | 0 | 0 | 0 | 2 | 2 |
| 2 | 2 | 0 | 0 | 0 | 2 | 1 |
| 0 | 3 | 0 | 0 | 0 | 0 | 0 |
| 1 | 1 | 0 | 1 | 0 | 0 | 3 |
| 1 | 3 | 0 | 0 | 0 | 2 | 2 |
| 0 | 0 | 0 | 0 | 0 | 2 | 5 |
| 0 | 0 | 1 | 3 | 1 | 0 | 2 |
| 0 | 3 | 0 | 1 | 0 | 2 | 1 |
| 0 | 3 | 1 | 1 | 0 | 0 | 2 |
| 0 | 2 | 0 | 2 | 0 | 0 | 0 |
| 0 | 0 | 2 | 1 | 0 | 4 | 3 |
| 1 | 0 | 0 | 1 | 0 | 2 | 0 |
| 0 | 0 | 2 | 2 | 0 | 0 | 3 |
| 0 | 0 | 0 | 3 | 0 | 0 | 1 |
| 1 | 0 | 0 | 0 | 0 | 1 | 1 |
| 0 | 1 | 1 | 7 | 0 | 1 | 1 |
| 4 | 1 | 0 | 0 | 0 | 1 | 1 |
| 0 | 0 | 0 | 1 | 0 | 0 | 2 |
| 1 | 0 | 0 | 0 | 0 | 0 | 0 |
| 0 | 0 | 1 | 3 | 0 | 0 | 2 |
| 2 | 0 | 2 | 1 | 0 | 0 | 3 |
| 0 | 0 | 0 | 1 | 0 | 3 | 0 |
| 0 | 0 | 0 | 0 | 0 | 1 | 0 |
| 0 | 3 | 0 | 1 | 0 | 1 | 0 |
| 0 | 0 | 0 | 1 | 0 | 0 | 0 |
| 1 | 0 | 1 | 0 | 0 | 1 | 2 |
| 0 | 5 | 1 | 1 | 0 | 1 | 2 |
| 0 | 3 | 0 | 0 | 0 | 1 | 3 |
| 0 | 0 | 0 | 0 | 0 | 2 | 1 |
| 0 | 0 | 0 | 0 | 0 | 1 | 0 |
| 0 | 1 | 0 | 1 | 0 | 0 | 0 |

|   |   |   |   |   |   |   |
|---|---|---|---|---|---|---|
| 0 | 1 | 0 | 2 | 0 | 2 | 1 |
| 0 | 2 | 0 | 4 | 0 | 0 | 2 |
| 0 | 0 | 0 | 1 | 0 | 0 | 0 |
| 0 | 0 | 0 | 0 | 0 | 0 | 0 |
| 2 | 1 | 1 | 0 | 0 | 1 | 2 |
| 0 | 0 | 1 | 0 | 0 | 0 | 0 |
| 0 | 0 | 0 | 1 | 0 | 1 | 0 |
| 0 | 0 | 0 | 1 | 0 | 0 | 0 |
| 0 | 0 | 0 | 0 | 0 | 2 | 2 |
| 1 | 0 | 0 | 1 | 0 | 0 | 0 |
| 0 | 4 | 0 | 4 | 0 | 3 | 1 |
| 1 | 0 | 1 | 3 | 0 | 1 | 4 |
| 0 | 1 | 1 | 0 | 0 | 3 | 2 |
| 0 | 3 | 0 | 1 | 0 | 1 | 4 |
| 0 | 1 | 0 | 2 | 0 | 0 | 3 |
| 1 | 0 | 0 | 1 | 0 | 0 | 1 |
| 0 | 0 | 0 | 4 | 0 | 3 | 2 |
| 0 | 0 | 1 | 2 | 0 | 1 | 0 |
| 0 | 2 | 2 | 0 | 0 | 0 | 1 |
| 0 | 0 | 0 | 0 | 0 | 0 | 0 |
| 0 | 0 | 0 | 0 | 0 | 1 | 0 |
| 0 | 1 | 0 | 2 | 0 | 0 | 0 |
| 0 | 0 | 0 | 0 | 0 | 1 | 2 |
| 0 | 0 | 1 | 0 | 0 | 1 | 1 |
| 0 | 1 | 1 | 0 | 0 | 0 | 0 |
| 2 | 0 | 2 | 1 | 0 | 0 | 2 |
| 1 | 2 | 1 | 0 | 0 | 3 | 1 |
| 0 | 1 | 1 | 1 | 0 | 2 | 1 |
| 0 | 2 | 1 | 0 | 0 | 2 | 0 |
| 0 | 1 | 0 | 0 | 0 | 1 | 4 |
| 0 | 0 | 1 | 0 | 0 | 0 | 0 |
| 0 | 0 | 1 | 0 | 0 | 0 | 1 |
| 0 | 0 | 0 | 0 | 0 | 0 | 2 |
| 0 | 0 | 1 | 1 | 0 | 1 | 1 |
| 0 | 2 | 1 | 0 | 0 | 0 | 0 |
| 1 | 3 | 1 | 0 | 0 | 3 | 1 |
| 0 | 2 | 1 | 1 | 0 | 1 | 2 |
| 0 | 0 | 0 | 0 | 0 | 0 | 1 |
| 1 | 0 | 0 | 0 | 0 | 0 | 0 |
| 0 | 0 | 0 | 1 | 0 | 0 | 0 |
| 0 | 1 | 1 | 0 | 0 | 0 | 2 |
| 1 | 1 | 2 | 0 | 0 | 1 | 0 |
| 1 | 0 | 2 | 1 | 0 | 0 | 1 |
| 0 | 1 | 0 | 0 | 0 | 0 | 0 |
| 2 | 1 | 0 | 0 | 0 | 2 | 0 |
| 2 | 0 | 2 | 0 | 0 | 1 | 2 |
| 1 | 0 | 1 | 0 | 0 | 0 | 0 |
| 1 | 2 | 0 | 1 | 0 | 0 | 0 |
| 0 | 0 | 0 | 3 | 0 | 0 | 0 |
| 0 | 0 | 0 | 0 | 0 | 1 | 0 |
| 0 | 1 | 2 | 0 | 0 | 2 | 3 |
| 0 | 0 | 1 | 0 | 0 | 1 | 1 |

|       |       |       |       |      |       |       |
|-------|-------|-------|-------|------|-------|-------|
| 15213 | 44480 | 15209 | 22415 | 819  | 24126 | 28880 |
| 36465 | 78672 | 35131 | 49868 | 1854 | 37864 | 40552 |

|        |        |       |       |       |       |       |
|--------|--------|-------|-------|-------|-------|-------|
| 445    | 408    | 440   | 428   | 497   | 419   | 399   |
| CHR_NP | CHR_NP | CHR_P | CHR_P | CHR_P | CHR_P | CHR_P |
| CHR_NP | CHR_NP | CHR_P | CHR_P | CHR_P | CHR_P | CHR_P |

|        |         |        |        |       |        |        |
|--------|---------|--------|--------|-------|--------|--------|
| 64     | 65      | 66     | 67     | 68    | 69     | 70     |
| 37     | 38      | 1      | 2      | 3     | 4      | 5      |
| CHR_NP | CHR_NP  | CHR_P  | CHR_P  | CHR_P | CHR_P  | CHR_P  |
| G_6    | G_7     | A_10   | A_12   | A_18  | A_3    | A_5    |
| 488065 | 1421920 | 492624 | 721119 | 27468 | 816795 | 972175 |
| CHR_NP | CHR_NP  | CHR_P  | CHR_P  | CHR_P | CHR_P  | CHR_P  |
| 12.94  | 8.98    | 12.54  | 11.66  | 7.89  | 5.48   | 6.88   |
| 2.18   | 2.95    | 0.50   | 0.60   | 10.22 | 1.42   | 2.04   |
| 2.03   | 0.83    | 0.66   | 0.34   | 0.92  | 1.48   | 1.78   |
| 3.21   | 3.43    | 2.49   | 0.63   | 1.50  | 6.97   | 3.38   |
| 1.99   | 1.84    | 3.15   | 0.55   | 0.65  | 2.66   | 3.02   |
| 0.70   | 2.27    | 0.36   | 3.85   | 0.55  | 0.86   | 1.34   |
| 1.92   | 1.94    | 0.32   | 0.70   | 0.79  | 0.91   | 1.80   |
| 0.11   | 0.34    | 0.29   | 1.11   | 0.14  | 0.18   | 0.26   |
| 0.54   | 1.97    | 0.38   | 2.22   | 0.11  | 0.28   | 0.63   |
| 0.52   | 1.00    | 1.85   | 3.58   | 2.20  | 1.53   | 1.40   |
| 0.65   | 0.62    | 2.07   | 1.08   | 0.82  | 1.10   | 0.83   |
| 0.46   | 0.43    | 0.55   | 0.40   | 0.25  | 1.09   | 1.11   |
| 0.50   | 0.63    | 0.65   | 0.27   | 0.17  | 1.27   | 0.87   |
| 0.50   | 0.50    | 0.51   | 0.42   | 0.29  | 1.61   | 0.72   |
| 0.12   | 0.25    | 0.75   | 0.18   | 0.23  | 0.39   | 0.34   |
| 0.25   | 0.09    | 0.38   | 0.07   | 0.01  | 0.12   | 0.14   |
| 0.06   | 0.21    | 0.08   | 0.18   | 0.11  | 0.23   | 0.45   |
| 0.08   | 0.11    | 0.39   | 0.18   | 0.42  | 0.57   | 0.60   |
| 0.19   | 0.25    | 0.11   | 0.42   | 0.15  | 0.11   | 0.30   |
| 0.15   | 0.15    | 0.21   | 0.18   | 0.94  | 0.12   | 0.24   |
| 0.10   | 0.09    | 0.14   | 0.11   | 0.18  | 0.14   | 0.21   |
| 0.14   | 0.17    | 0.33   | 0.27   | 0.20  | 0.42   | 0.37   |
| 0.07   | 0.11    | 0.09   | 0.14   | 0.15  | 0.04   | 0.12   |
| 0.04   | 0.10    | 0.06   | 0.14   | 0.13  | 0.08   | 0.31   |
| 0.07   | 0.25    | 0.11   | 0.13   | 0.37  | 0.06   | 0.19   |
| 0.07   | 0.10    | 0.10   | 0.18   | 0.03  | 0.07   | 0.12   |
| 0.13   | 0.12    | 0.36   | 0.07   | 0.07  | 0.37   | 0.15   |
| 0.09   | 0.04    | 0.40   | 0.13   | 0.25  | 0.11   | 0.12   |
| 0.08   | 0.13    | 0.10   | 0.09   | 0.15  | 0.27   | 0.18   |
| 0.12   | 0.10    | 0.07   | 0.10   | 0.10  | 0.07   | 0.10   |
| 0.11   | 0.09    | 0.06   | 0.07   | 0.05  | 0.09   | 0.18   |
| 0.19   | 0.16    | 0.15   | 0.02   | 0.02  | 0.41   | 0.19   |
| 0.05   | 0.08    | 0.04   | 0.14   | 0.01  | 0.07   | 0.13   |
| 0.02   | 0.01    | 0.05   | 0.12   | 0.04  | 0.02   | 0.07   |
| 0.07   | 0.12    | 0.07   | 0.06   | 0.10  | 0.19   | 0.12   |
| 0.09   | 0.10    | 0.05   | 0.11   | 0.24  | 0.63   | 0.19   |
| 0.05   | 0.09    | 0.07   | 0.15   | 0.59  | 0.12   | 0.13   |
| 0.06   | 0.11    | 0.07   | 0.17   | 0.49  | 0.07   | 0.14   |
| 0.07   | 0.04    | 0.01   | 0.02   | 0.18  | 0.04   | 0.09   |
| 0.16   | 0.08    | 0.18   | 0.02   | 0.01  | 0.18   | 0.07   |
| 0.02   | 0.02    | 0.04   | 0.03   | 0.14  | 0.14   | 0.18   |
| 0.06   | 0.04    | 0.14   | 0.02   | 0.01  | 0.08   | 0.10   |
| 0.05   | 0.06    | 0.04   | 0.05   | 0.08  | 0.16   | 0.13   |
| 0.01   | 0.03    | 0.04   | 0.04   | 0.10  | 0.03   | 0.02   |
| 0.03   | 0.03    | 0.06   | 0.06   | 0.13  | 0.06   | 0.09   |
| 0.05   | 0.03    | 0.04   | 0.03   | 0.04  | 0.06   | 0.11   |
| 0.06   | 0.04    | 0.01   | 0.04   | 0.02  | 0.04   | 0.06   |
| 0.05   | 0.03    | 0.11   | 0.02   | 0.03  | 0.05   | 0.09   |
| 0.01   | 0.02    | 0.02   | 0.01   | 0.00  | 0.04   | 0.03   |
| 0.01   | 0.01    | 0.10   | 0.02   | 0.01  | 0.00   | 0.01   |
| 0.03   | 0.01    | 0.01   | 0.03   | 0.02  | 0.05   | 0.06   |
| 0.01   | 0.02    | 0.01   | 0.02   | 0.04  | 0.03   | 0.05   |

|      |      |      |      |      |      |      |
|------|------|------|------|------|------|------|
| 0.03 | 0.02 | 0.02 | 0.05 | 0.08 | 0.05 | 0.04 |
| 0.01 | 0.01 | 0.14 | 0.02 | 0.06 | 0.02 | 0.07 |
| 0.04 | 0.05 | 0.02 | 0.02 | 0.00 | 0.00 | 0.00 |
| 0.00 | 0.00 | 0.02 | 0.01 | 0.00 | 0.00 | 0.00 |
| 0.03 | 0.04 | 0.01 | 0.04 | 0.03 | 0.04 | 0.05 |
| 0.01 | 0.02 | 0.02 | 0.01 | 0.01 | 0.02 | 0.05 |
| 0.02 | 0.02 | 0.03 | 0.02 | 0.05 | 0.03 | 0.05 |
| 0.04 | 0.01 | 0.02 | 0.01 | 0.08 | 0.04 | 0.05 |
| 0.02 | 0.01 | 0.02 | 0.03 | 0.02 | 0.07 | 0.06 |
| 0.01 | 0.01 | 0.04 | 0.01 | 0.01 | 0.01 | 0.02 |
| 0.00 | 0.01 | 0.00 | 0.04 | 0.01 | 0.00 | 0.01 |
| 0.00 | 0.00 | 0.00 | 0.00 | 0.00 | 0.00 | 0.00 |
| 0.03 | 0.02 | 0.07 | 0.01 | 0.04 | 0.10 | 0.03 |
| 0.01 | 0.02 | 0.01 | 0.03 | 0.02 | 0.04 | 0.04 |
| 0.01 | 0.01 | 0.01 | 0.03 | 0.00 | 0.01 | 0.01 |
| 0.01 | 0.02 | 0.02 | 0.01 | 0.01 | 0.02 | 0.02 |
| 0.00 | 0.01 | 0.01 | 0.01 | 0.01 | 0.02 | 0.03 |
| 0.01 | 0.01 | 0.01 | 0.04 | 0.14 | 0.02 | 0.02 |
| 0.02 | 0.01 | 0.01 | 0.01 | 0.03 | 0.02 | 0.02 |
| 0.01 | 0.01 | 0.03 | 0.01 | 0.01 | 0.08 | 0.03 |
| 0.01 | 0.01 | 0.02 | 0.02 | 0.02 | 0.01 | 0.02 |
| 0.01 | 0.02 | 0.03 | 0.02 | 0.01 | 0.01 | 0.01 |
| 0.01 | 0.01 | 0.00 | 0.01 | 0.01 | 0.01 | 0.03 |
| 0.01 | 0.00 | 0.01 | 0.01 | 0.01 | 0.03 | 0.04 |
| 0.02 | 0.03 | 0.01 | 0.01 | 0.00 | 0.00 | 0.00 |
| 0.03 | 0.01 | 0.00 | 0.01 | 0.13 | 0.00 | 0.01 |
| 0.02 | 0.01 | 0.03 | 0.00 | 0.00 | 0.03 | 0.02 |
| 0.01 | 0.00 | 0.00 | 0.01 | 0.02 | 0.01 | 0.01 |
| 0.01 | 0.02 | 0.01 | 0.02 | 0.00 | 0.03 | 0.03 |
| 0.01 | 0.00 | 0.02 | 0.00 | 0.00 | 0.01 | 0.01 |
| 0.01 | 0.01 | 0.00 | 0.00 | 0.03 | 0.04 | 0.02 |
| 0.00 | 0.00 | 0.00 | 0.02 | 0.00 | 0.00 | 0.00 |
| 0.01 | 0.01 | 0.00 | 0.01 | 0.02 | 0.00 | 0.01 |
| 0.00 | 0.00 | 0.01 | 0.01 | 0.00 | 0.01 | 0.01 |
| 0.01 | 0.00 | 0.00 | 0.01 | 0.01 | 0.02 | 0.01 |
| 0.00 | 0.01 | 0.01 | 0.02 | 0.00 | 0.01 | 0.02 |
| 0.01 | 0.01 | 0.00 | 0.01 | 0.01 | 0.01 | 0.02 |
| 0.01 | 0.01 | 0.01 | 0.00 | 0.01 | 0.02 | 0.02 |
| 0.01 | 0.01 | 0.02 | 0.00 | 0.01 | 0.01 | 0.01 |
| 0.00 | 0.00 | 0.00 | 0.00 | 0.00 | 0.00 | 0.00 |
| 0.01 | 0.00 | 0.01 | 0.00 | 0.00 | 0.00 | 0.01 |
| 0.00 | 0.01 | 0.00 | 0.01 | 0.01 | 0.00 | 0.01 |
| 0.00 | 0.00 | 0.00 | 0.01 | 0.00 | 0.00 | 0.00 |
| 0.00 | 0.00 | 0.01 | 0.00 | 0.00 | 0.00 | 0.01 |
| 0.01 | 0.00 | 0.01 | 0.00 | 0.01 | 0.01 | 0.01 |
| 0.01 | 0.00 | 0.02 | 0.00 | 0.01 | 0.01 | 0.01 |
| 0.01 | 0.00 | 0.01 | 0.00 | 0.02 | 0.01 | 0.01 |
| 0.00 | 0.00 | 0.00 | 0.00 | 0.00 | 0.00 | 0.00 |
| 0.00 | 0.00 | 0.00 | 0.01 | 0.00 | 0.02 | 0.01 |
| 0.01 | 0.01 | 0.00 | 0.00 | 0.00 | 0.00 | 0.01 |
| 0.01 | 0.00 | 0.01 | 0.00 | 0.00 | 0.01 | 0.01 |
| 0.01 | 0.01 | 0.01 | 0.00 | 0.02 | 0.01 | 0.01 |
| 0.00 | 0.01 | 0.00 | 0.01 | 0.00 | 0.01 | 0.01 |
| 0.00 | 0.00 | 0.02 | 0.01 | 0.00 | 0.01 | 0.01 |
| 0.00 | 0.00 | 0.00 | 0.00 | 0.01 | 0.00 | 0.01 |
| 0.00 | 0.00 | 0.00 | 0.00 | 0.01 | 0.00 | 0.01 |
| 0.00 | 0.00 | 0.00 | 0.01 | 0.00 | 0.01 | 0.01 |
| 0.00 | 0.01 | 0.01 | 0.00 | 0.00 | 0.00 | 0.00 |
| 0.00 | 0.00 | 0.01 | 0.00 | 0.00 | 0.00 | 0.01 |









|       |       |       |       |       |       |       |
|-------|-------|-------|-------|-------|-------|-------|
| -0.10 | 2.74  | -0.41 | 3.23  | -0.96 | -0.62 | 0.07  |
| -0.60 | 0.61  | 2.79  | 7.24  | 3.69  | 1.97  | 1.63  |
| 0.66  | 0.58  | 6.00  | 2.28  | 1.32  | 2.35  | 1.34  |
| -0.30 | -0.57 | 0.49  | -0.81 | -2.17 | 5.34  | 5.55  |
| 0.82  | 1.59  | 1.66  | -0.52 | -1.08 | 5.24  | 2.97  |
| 0.18  | 0.18  | 0.24  | -0.27 | -1.02 | 6.59  | 1.48  |
| -0.46 | 0.15  | 2.44  | -0.19 | 0.05  | 0.77  | 0.55  |
| -0.19 | -0.88 | 0.38  | -0.97 | -1.25 | -0.76 | -0.70 |
| -0.61 | 0.33  | -0.48 | 0.16  | -0.29 | 0.44  | 1.84  |
| -1.29 | -1.08 | 1.76  | -0.36 | 2.03  | 3.48  | 3.75  |
| 0.08  | 0.59  | -0.68 | 2.16  | -0.32 | -0.64 | 1.01  |
| -0.79 | -0.82 | -0.20 | -0.48 | 7.04  | -1.10 | 0.12  |
| -0.94 | -1.03 | -0.22 | -0.75 | 0.40  | -0.30 | 0.84  |
| -0.18 | 0.28  | 2.75  | 1.74  | 0.80  | 4.05  | 3.41  |
| -0.58 | -0.11 | -0.38 | 0.26  | 0.43  | -1.02 | 0.07  |
| -0.72 | -0.19 | -0.59 | 0.24  | 0.13  | -0.34 | 1.83  |
| -0.38 | 0.69  | -0.14 | 0.02  | 1.40  | -0.39 | 0.36  |
| -0.93 | -0.22 | -0.29 | 1.31  | -1.66 | -0.87 | 0.11  |
| -0.15 | -0.31 | 3.48  | -1.09 | -1.07 | 3.76  | 0.22  |
| -0.24 | -0.66 | 2.73  | 0.19  | 1.31  | 0.00  | 0.08  |
| -0.50 | 0.45  | -0.08 | -0.38 | 0.86  | 3.26  | 1.33  |
| 0.48  | -0.09 | -0.83 | 0.00  | 0.07  | -0.84 | -0.06 |
| 0.38  | 0.06  | -0.83 | -0.50 | -1.06 | 0.01  | 2.01  |
| 1.27  | 0.68  | 0.49  | -1.92 | -1.94 | 5.63  | 1.24  |
| -0.12 | 0.33  | -0.36 | 1.24  | -0.73 | 0.15  | 1.06  |
| -0.28 | -0.33 | -0.14 | 0.24  | -0.19 | -0.28 | -0.02 |
| -0.45 | 0.50  | -0.48 | -0.80 | 0.23  | 2.18  | 0.59  |
| -0.30 | -0.25 | -0.55 | -0.20 | 0.56  | 2.96  | 0.29  |
| -0.81 | -0.22 | -0.51 | 0.44  | 5.63  | 0.04  | 0.19  |
| -0.31 | 0.20  | -0.22 | 0.76  | 4.06  | -0.19 | 0.44  |
| -0.39 | -0.71 | -1.05 | -0.94 | 0.93  | -0.74 | -0.12 |
| 0.45  | -0.16 | 0.66  | -0.63 | -0.69 | 0.67  | -0.22 |
| -1.09 | -1.18 | -0.80 | -0.90 | 1.29  | 1.37  | 2.17  |
| -0.23 | -0.73 | 2.04  | -1.60 | -1.70 | 0.20  | 0.98  |
| -0.49 | -0.17 | -0.99 | -0.77 | 0.51  | 3.77  | 2.80  |
| -0.59 | -0.16 | 0.07  | 0.08  | 1.46  | -0.20 | -0.32 |
| -0.61 | -0.63 | 0.03  | -0.06 | 1.34  | -0.06 | 0.49  |
| 0.12  | -1.15 | -0.33 | -0.94 | -0.36 | 0.79  | 4.54  |
| 0.84  | 0.13  | -1.11 | 0.16  | -0.86 | -0.21 | 0.68  |
| -0.15 | -0.72 | 2.07  | -0.88 | -0.68 | 0.17  | 1.20  |
| 0.03  | 0.15  | 0.24  | -0.21 | -0.36 | 1.03  | 0.48  |
| -0.50 | -0.46 | 1.64  | -0.33 | -0.47 | -0.65 | -0.37 |
| -0.22 | -1.58 | -1.59 | -0.31 | -0.99 | 0.71  | 1.52  |
| -0.61 | -0.46 | -0.68 | -0.34 | 0.10  | -0.20 | 0.60  |
| -0.76 | -0.83 | -1.46 | 1.19  | 3.19  | 0.96  | 0.63  |
| -1.16 | -0.93 | 5.98  | -0.63 | 1.81  | -0.39 | 2.28  |
| 1.03  | 1.13  | -0.44 | -0.44 | -1.38 | -1.36 | -1.30 |

|       |       |       |       |       |       |       |
|-------|-------|-------|-------|-------|-------|-------|
| -0.27 | -0.24 | 0.58  | 0.08  | -0.23 | -0.31 | -0.20 |
| -0.09 | 0.87  | -1.72 | 0.94  | 0.10  | 0.88  | 1.67  |
| -1.02 | -0.54 | -0.60 | -1.08 | -1.28 | -0.73 | 1.85  |
| -0.43 | -0.98 | -0.21 | -0.92 | 1.08  | 0.26  | 1.59  |
| -0.08 | -0.75 | -0.53 | -0.90 | 1.04  | -0.07 | 0.14  |
| -0.42 | -1.11 | -0.76 | 0.10  | -0.41 | 3.52  | 3.03  |
| -0.87 | -0.77 | 1.27  | -0.81 | -1.22 | -0.99 | -0.01 |
| -0.52 | -0.07 | -0.57 | 2.04  | 0.13  | -0.42 | -0.17 |
| -0.25 | -0.21 | -0.28 | -0.17 | -0.24 | -0.28 | -0.24 |
| 0.19  | -0.56 | 2.38  | -1.19 | 0.48  | 4.06  | 0.04  |
| -0.19 | 0.78  | -0.50 | 1.62  | 0.64  | 2.45  | 1.86  |
| -0.08 | -0.32 | -0.32 | 1.20  | -0.62 | -0.28 | 0.07  |
| -0.33 | 0.64  | 0.84  | 0.43  | -0.31 | 1.20  | 1.19  |
| -0.93 | -0.34 | -0.29 | 0.11  | -0.34 | 0.53  | 2.33  |
| -0.25 | -0.24 | -0.32 | 0.08  | 1.32  | -0.22 | -0.16 |
| -0.25 | -1.02 | -1.12 | -0.55 | 0.29  | 0.05  | -0.18 |
| -1.00 | -1.29 | 0.75  | -0.74 | -0.93 | 5.61  | 1.25  |
| -0.34 | 0.17  | 0.72  | 0.99  | 0.88  | 0.19  | 0.57  |
| -0.31 | 0.62  | 1.70  | 1.27  | -0.54 | -0.18 | -0.29 |
| 0.23  | 0.01  | -0.88 | -0.02 | -0.31 | -0.20 | 2.06  |
| -0.20 | -1.20 | -0.30 | -0.76 | -0.92 | 1.12  | 1.53  |
| 1.22  | 1.34  | -0.27 | -0.20 | -1.76 | -1.68 | -1.58 |
| 0.16  | -0.18 | -0.49 | -0.38 | 2.88  | -0.44 | -0.33 |
| -0.09 | -0.88 | 0.99  | -1.41 | -1.39 | 0.89  | 0.34  |
| -0.89 | -1.09 | -1.24 | -0.42 | 0.33  | -0.04 | -0.53 |
| -0.59 | 0.92  | -0.61 | 1.21  | -1.21 | 3.19  | 4.29  |
| -0.74 | -1.20 | 1.55  | -1.05 | -1.76 | -0.92 | -0.17 |
| -0.20 | -0.88 | -1.18 | -1.17 | 1.63  | 2.55  | 0.51  |
| -0.32 | -0.45 | -0.37 | 0.37  | -0.34 | -0.45 | -0.29 |
| -0.22 | 0.57  | -0.64 | 0.46  | 1.34  | -0.65 | 0.81  |
| -0.68 | -0.96 | -0.48 | -0.27 | -1.55 | -0.17 | 0.57  |
| -0.53 | -1.78 | -1.71 | -1.60 | -0.19 | 0.41  | 0.18  |
| -0.53 | 1.12  | 0.60  | 1.95  | -0.81 | 0.93  | 1.66  |
| -0.86 | -0.26 | -0.98 | 1.01  | -0.60 | 0.88  | 3.09  |
| -0.08 | -0.74 | 0.02  | -1.26 | -0.56 | 0.65  | 0.41  |
| -0.72 | -0.58 | 2.73  | -1.55 | -0.16 | -0.08 | 0.03  |
| -0.19 | -0.14 | -0.24 | -0.17 | -0.32 | -0.17 | -0.26 |
| -0.04 | -0.73 | -0.21 | -0.45 | -1.44 | -0.76 | 1.20  |
| -0.27 | 0.34  | -0.63 | 1.26  | 0.32  | -0.49 | 0.34  |
| -0.39 | -0.18 | -0.25 | 0.65  | -0.70 | -0.36 | 0.01  |
| -0.79 | -0.65 | -0.01 | -0.33 | -0.22 | -0.28 | 1.22  |
| -0.29 | -1.23 | -0.44 | -1.61 | -0.14 | -0.42 | -0.11 |
| -0.26 | -1.46 | 3.41  | -1.66 | 2.48  | 1.23  | 1.63  |
| 0.05  | -0.63 | 0.13  | -1.24 | 2.62  | 1.64  | 1.60  |
| -0.48 | 0.21  | -0.53 | 0.14  | -0.81 | -0.44 | -0.29 |
| -0.65 | -0.63 | -0.61 | 0.83  | -0.59 | 2.93  | 1.23  |
| 0.35  | 1.18  | -1.80 | -0.14 | -1.52 | -0.46 | 0.53  |
| 0.77  | -0.82 | -0.42 | -0.86 | -1.35 | 0.17  | 0.06  |

|       |       |       |       |       |       |       |
|-------|-------|-------|-------|-------|-------|-------|
| -0.26 | -0.27 | -0.11 | -0.45 | 1.23  | -0.01 | 0.18  |
| -0.55 | 0.15  | -0.94 | 2.71  | 0.09  | 0.49  | 1.91  |
| -0.52 | 0.22  | 4.09  | 2.19  | 0.08  | 0.48  | 0.67  |
| -0.48 | -1.15 | -1.28 | -0.75 | 1.31  | -0.23 | 0.81  |
| -0.54 | -0.31 | -0.85 | -0.41 | 0.28  | -0.46 | -0.17 |
| -0.30 | 0.11  | -0.55 | 0.85  | -1.19 | 0.83  | 1.04  |
| 0.28  | 1.56  | 0.65  | 0.23  | -1.34 | -0.07 | 0.40  |
| -0.82 | -0.28 | 1.43  | -0.60 | 0.23  | -0.52 | 1.40  |
| -0.68 | -1.21 | 0.88  | -1.29 | -0.52 | 1.54  | 2.17  |
| -0.49 | -0.63 | -0.36 | -0.18 | -0.55 | 1.38  | 1.99  |
| -0.32 | 1.52  | -0.21 | 0.94  | 2.11  | 2.51  | 3.05  |
| 0.04  | -0.94 | -0.96 | -1.25 | -0.11 | -0.71 | 0.41  |
| 0.07  | -0.19 | 0.78  | -1.28 | 1.60  | 2.96  | 1.34  |
| -0.82 | 4.46  | 4.44  | -0.61 | 0.30  | 0.11  | 1.46  |
| 0.18  | -0.36 | -0.55 | 0.55  | -0.84 | 0.80  | 1.87  |
| 0.18  | -0.36 | -0.55 | 0.55  | -0.84 | 0.80  | 1.87  |
| -0.39 | -0.66 | -0.53 | 0.23  | 0.15  | 1.22  | 0.67  |
| -0.45 | -0.18 | -0.12 | 3.06  | -0.40 | -0.07 | -0.06 |
| -1.33 | -1.15 | 1.76  | -0.12 | 0.18  | -0.11 | 1.86  |
| 0.04  | -0.70 | -0.44 | 0.15  | -0.52 | -0.74 | -0.06 |
| -0.77 | -0.51 | 1.76  | -0.11 | 1.52  | -0.71 | 0.51  |
| -0.18 | -0.24 | -0.37 | -0.34 | -0.39 | -0.36 | -0.33 |
| 0.21  | -1.06 | -1.13 | -1.09 | -0.61 | 1.45  | 1.66  |
| 0.27  | -0.01 | -1.20 | 0.20  | -0.18 | -0.47 | -0.17 |
| -0.37 | -1.07 | -0.50 | -0.74 | -1.52 | -0.06 | 0.54  |
| -0.92 | -0.98 | -0.65 | -0.65 | 0.99  | 1.32  | 0.81  |
| -0.38 | -0.37 | 0.15  | -0.77 | 0.01  | -0.15 | 0.44  |
| 3.01  | 2.10  | -0.67 | -0.38 | -0.25 | -0.69 | -0.68 |
| 0.43  | -0.83 | 2.28  | -0.05 | 0.18  | 0.67  | 4.25  |
| -0.37 | -0.17 | -0.46 | 0.36  | 0.19  | -0.48 | 0.55  |
| -0.90 | -0.84 | -0.82 | -0.30 | 0.82  | 0.27  | 0.46  |
| 0.08  | 0.00  | -0.26 | 2.98  | -0.86 | -0.36 | 1.70  |
| -1.26 | -0.81 | 1.10  | -1.15 | -2.01 | -0.96 | 0.96  |

| 27                                                                                          | 28         | 29         | 30         | 31          | 32        | 33         |
|---------------------------------------------------------------------------------------------|------------|------------|------------|-------------|-----------|------------|
| 63                                                                                          | 64         | 65         | 66         | 67          | 68        | 69         |
| AGCTACATTGTC TGAGACCTCTGGC CATTATTACTTT CATAAAGTAGAA GCCCTGACCTGT CAAAGTGCTTAC TGTA AACATCC |            |            |            |             |           |            |
| miR-221-3p                                                                                  | miR-769-5p | miR-126-5p | miR-142-5p | miR-4732-3p | miR-17-5p | miR-30b-5p |
| 106297                                                                                      | 102201     | 96743      | 94911      | 93386       | 87898     | 82798      |
| 1.65                                                                                        | 0.08       | -0.60      | -0.26      | -0.14       | -0.65     | 0.64       |
| 0.31                                                                                        | -0.65      | -0.11      | -0.08      | -0.42       | -0.98     | -0.89      |
| -0.84                                                                                       | -0.69      | -0.29      | -0.26      | -0.06       | 1.93      | -0.45      |
| -0.94                                                                                       | -1.15      | -0.52      | -0.27      | 0.11        | -0.36     | -0.52      |
| 0.52                                                                                        | -0.42      | -0.31      | -0.21      | -1.30       | 1.12      | -0.18      |
| -0.54                                                                                       | -0.62      | -0.50      | -0.24      | 1.41        | -1.04     | -0.72      |
| 1.79                                                                                        | -0.13      | -0.60      | -0.26      | -0.02       | -0.73     | -0.47      |
| -0.56                                                                                       | 0.09       | -0.56      | -0.17      | 2.11        | -0.97     | -0.61      |
| -1.23                                                                                       | -1.16      | -0.40      | -0.26      | 1.34        | -0.55     | -0.71      |
| -0.55                                                                                       | -0.45      | 0.18       | -0.22      | 0.03        | 0.48      | 0.46       |
| -0.30                                                                                       | 0.18       | 1.28       | -0.16      | -0.98       | 0.08      | -0.11      |
| -0.94                                                                                       | 0.09       | -0.60      | -0.28      | 1.69        | -1.29     | -0.47      |
| 3.07                                                                                        | 2.44       | 1.97       | 0.10       | -1.19       | 1.55      | 3.84       |
| -0.68                                                                                       | -0.22      | -0.59      | -0.25      | 0.59        | -0.96     | -0.66      |
| -0.54                                                                                       | -0.04      | -0.28      | -0.08      | -0.39       | 0.96      | -0.42      |
| 0.93                                                                                        | 0.74       | 1.18       | -0.06      | -0.45       | 1.19      | 0.82       |
| -0.19                                                                                       | 0.39       | -0.62      | -0.21      | -0.80       | -0.45     | -0.28      |
| 0.02                                                                                        | 0.12       | -0.25      | -0.22      | 0.05        | 1.49      | -0.07      |
| -0.90                                                                                       | 3.16       | -0.25      | -0.23      | -1.28       | -0.30     | -0.06      |
| -0.57                                                                                       | 1.19       | 2.98       | 4.98       | -0.66       | 1.17      | 2.06       |

|       |       |       |       |       |       |       |
|-------|-------|-------|-------|-------|-------|-------|
| -0.30 | -0.94 | -0.48 | -0.23 | 1.94  | -0.47 | -0.40 |
| 0.08  | 0.33  | -0.68 | -0.27 | -0.25 | -0.99 | -0.53 |
| 0.06  | -0.12 | -0.64 | -0.24 | 0.23  | -0.61 | -0.29 |
| -0.45 | -0.40 | -0.67 | -0.23 | 0.88  | -0.88 | -0.41 |
| 0.26  | -1.44 | -0.39 | -0.21 | -0.36 | -0.52 | -0.63 |
| 1.36  | 0.10  | -0.49 | -0.21 | -1.42 | 0.19  | 0.17  |
| -0.50 | -0.47 | 2.24  | 0.03  | -0.64 | 1.59  | 0.87  |
| -0.64 | -0.76 | 19.45 | 7.70  | -1.17 | 2.58  | 0.85  |
| -0.67 | 0.07  | 0.31  | -0.16 | -0.95 | 0.06  | -0.31 |
| -1.18 | -0.53 | -0.05 | -0.25 | -0.05 | -0.07 | -0.67 |
| -1.04 | -1.44 | -0.50 | -0.24 | 7.78  | 0.18  | -0.80 |
| -0.42 | 0.31  | 2.09  | -0.20 | -0.09 | 0.63  | -0.05 |
| 1.37  | -0.67 | 0.71  | -0.11 | -1.13 | 2.62  | 0.13  |
| 0.55  | 0.43  | -0.59 | -0.23 | -0.09 | -0.55 | -0.38 |
| 0.88  | 0.95  | -0.38 | -0.17 | -0.58 | -0.28 | 1.87  |
| 0.82  | 0.53  | -0.50 | -0.08 | -1.24 | -0.91 | -0.45 |
| -1.51 | -1.57 | -0.65 | -0.25 | 4.89  | -1.42 | -0.81 |
| 1.56  | 1.14  | -0.22 | -0.13 | -1.26 | -0.27 | 2.90  |
| 4.18  | 2.86  | 2.40  | -0.06 | -1.41 | 1.75  | 4.35  |
| -0.23 | 1.21  | -0.54 | -0.22 | -1.23 | -0.76 | -0.04 |
| 2.33  | 1.32  | -0.70 | -0.24 | -1.06 | -0.81 | -0.28 |
| 13.01 | 8.27  | -0.51 | -0.19 | -0.73 | -0.85 | 0.25  |
| 1.12  | -0.57 | -0.32 | -0.16 | -0.71 | -0.59 | -0.60 |
| 0.00  | 1.53  | 0.13  | -0.19 | -0.78 | 0.82  | 0.95  |
| -0.76 | 0.09  | -0.52 | -0.22 | 0.04  | -0.95 | -0.57 |
| -0.23 | -0.27 | -0.61 | -0.16 | -0.45 | -1.02 | -0.70 |
| -0.19 | 0.95  | -0.19 | 0.07  | -1.32 | 0.36  | 0.35  |
| 0.68  | 0.98  | -0.63 | -0.20 | -0.19 | -0.69 | -0.02 |
| -0.15 | 0.07  | -0.20 | -0.17 | 0.17  | 0.02  | 0.42  |
| -0.54 | 1.14  | -0.62 | -0.13 | -0.62 | -0.34 | 0.03  |
| 0.79  | 0.41  | -0.07 | -0.14 | -0.73 | 0.59  | 1.25  |
| 1.99  | -0.89 | -0.54 | -0.20 | -1.05 | -0.65 | -0.43 |
| 0.82  | -1.00 | -0.54 | -0.24 | -0.28 | -0.30 | -0.61 |
| 1.13  | -0.07 | -0.54 | -0.24 | -1.16 | 0.61  | 0.11  |
| -0.32 | -1.02 | -0.60 | -0.24 | 0.47  | -1.04 | -0.57 |
| -0.34 | -0.80 | -0.52 | -0.25 | -0.70 | -0.77 | -0.61 |
| -0.15 | -1.04 | -0.24 | -0.24 | 0.53  | -0.41 | -0.07 |
| -0.98 | 0.42  | 11.46 | 4.81  | -1.25 | 2.52  | 3.23  |
| 0.08  | -0.17 | -0.61 | -0.25 | -0.68 | -0.15 | -0.36 |
| 2.72  | 0.15  | -0.29 | -0.19 | -0.43 | 0.98  | 0.66  |
| 2.01  | -0.50 | -0.36 | -0.06 | -0.93 | 1.64  | 0.37  |
| -1.28 | -0.47 | 8.89  | 3.55  | -0.96 | 3.12  | 1.93  |
| -0.74 | -0.43 | -0.51 | -0.24 | 0.32  | -0.75 | -0.48 |
| -0.42 | -0.87 | -0.52 | -0.25 | 0.19  | -0.19 | -0.08 |
| -1.11 | -0.77 | -0.07 | -0.21 | -0.56 | 0.78  | -0.32 |
| -0.76 | 1.27  | -0.57 | -0.28 | 2.38  | -0.50 | -0.32 |
| 0.10  | -0.81 | 2.04  | -0.17 | -1.19 | 1.62  | 1.20  |
| -0.41 | -1.22 | 0.13  | -0.24 | 0.48  | 0.64  | -0.62 |
| 3.52  | -0.99 | -0.42 | -0.28 | 4.06  | 2.45  | -0.28 |
| 3.03  | -0.01 | -0.17 | -0.24 | 0.04  | 1.86  | 0.07  |
| 0.21  | -0.84 | -0.51 | -0.26 | 1.30  | -0.29 | -0.52 |
| -1.21 | -0.68 | -0.07 | -0.01 | 0.30  | 0.21  | 1.79  |
| -0.72 | -1.01 | -0.15 | -0.24 | -0.10 | 0.02  | -0.01 |
| 0.42  | 0.80  | 0.17  | -0.24 | 0.01  | 0.45  | 1.35  |
| 3.88  | 2.31  | -0.60 | -0.25 | -0.21 | -1.55 | -0.72 |
| -0.54 | 0.22  | -0.02 | -0.22 | -0.25 | 0.34  | 0.19  |
| -0.99 | 1.40  | -0.23 | -0.24 | -1.25 | -0.02 | -0.02 |
| -1.31 | -0.11 | 0.18  | -0.24 | -0.24 | -1.13 | -0.59 |
| 0.51  | 0.88  | 0.75  | 0.12  | -1.36 | 2.84  | 1.60  |

|       |       |       |       |       |       |       |
|-------|-------|-------|-------|-------|-------|-------|
| -0.38 | 0.65  | 0.03  | -0.04 | -1.38 | 0.39  | 0.18  |
| -0.86 | -0.20 | -0.42 | -0.13 | -0.68 | -0.62 | -0.58 |
| -0.25 | -0.18 | -0.32 | -0.06 | -0.92 | -0.06 | 0.03  |
| -0.95 | 0.59  | -0.64 | -0.18 | -0.47 | -0.81 | 0.58  |
| -0.03 | 1.82  | 4.01  | 6.06  | -1.30 | 0.80  | 5.08  |
| -1.29 | -0.22 | 6.09  | 8.26  | -1.03 | 2.14  | 3.34  |
| 0.03  | 0.52  | -0.51 | -0.19 | -0.37 | -0.49 | 0.03  |
| -0.08 | 0.53  | -0.48 | -0.18 | -1.06 | -0.18 | 0.30  |
| -0.44 | -0.77 | -0.50 | -0.20 | -0.09 | -0.53 | -0.09 |
| -0.52 | 1.02  | -0.18 | -0.23 | -0.96 | 0.73  | 0.61  |
| -0.15 | -0.11 | -0.48 | -0.21 | -0.83 | -0.18 | -0.15 |
| -1.14 | 0.80  | -0.21 | -0.19 | -0.30 | 0.12  | -0.30 |
| -0.89 | -0.90 | -0.58 | -0.25 | -0.03 | -1.01 | -0.58 |
| -0.26 | -0.05 | -0.63 | -0.21 | -0.46 | -0.82 | -0.30 |
| -0.49 | 0.09  | -0.09 | -0.24 | -0.70 | 0.19  | -0.45 |
| 0.47  | -0.61 | 0.29  | -0.22 | -0.83 | 0.20  | 2.50  |

|      |      |      |      |      |      |      |
|------|------|------|------|------|------|------|
| 1    | 0    | 1    | -1   | 1    | 0    | -1   |
| 0.00 | 0.00 | 0.00 | 0.00 | 0.00 | 0.00 | 0.00 |
| 1.00 | 1.00 | 1.00 | 1.00 | 1.00 | 1.00 | 1.00 |
| 0.15 | 0.82 | 0.35 | 0.88 | 0.96 | 0.76 | 0.75 |

| 61          | 62            | 63            | 64           | 65            | 66           | 67           |
|-------------|---------------|---------------|--------------|---------------|--------------|--------------|
| AGTACATTGTC | TGAGACCTCTGGC | CATTATTACTTTT | CATAAAGTAGAA | GCCCTGACCTGTC | CAAAGTGCTTAC | TGTA AACATCC |
| miR-221-3p  | miR-769-5p    | miR-126-5p    | miR-142-5p   | miR-4732-3p   | miR-17-5p    | miR-30b-5p   |
| 106297      | 102201        | 96743         | 94911        | 93386         | 87898        | 82798        |
| 1.65        | 0.08          | -0.60         | -0.26        | -0.14         | -0.65        | 0.64         |
| 0.31        | -0.65         | -0.11         | -0.08        | -0.42         | -0.98        | -0.89        |
| -0.84       | -0.69         | -0.29         | -0.26        | -0.06         | 1.93         | -0.45        |
| -0.94       | -1.15         | -0.52         | -0.27        | 0.11          | -0.36        | -0.52        |
| 0.52        | -0.42         | -0.31         | -0.21        | -1.30         | 1.12         | -0.18        |
| -0.54       | -0.62         | -0.50         | -0.24        | 1.41          | -1.04        | -0.72        |
| 1.79        | -0.13         | -0.60         | -0.26        | -0.02         | -0.73        | -0.47        |
| -0.56       | 0.09          | -0.56         | -0.17        | 2.11          | -0.97        | -0.61        |
| -1.23       | -1.16         | -0.40         | -0.26        | 1.34          | -0.55        | -0.71        |
| -0.55       | -0.45         | 0.18          | -0.22        | 0.03          | 0.48         | 0.46         |
| -0.30       | 0.18          | 1.28          | -0.16        | -0.98         | 0.08         | -0.11        |
| -0.94       | 0.09          | -0.60         | -0.28        | 1.69          | -1.29        | -0.47        |
| 3.07        | 2.44          | 1.97          | 0.10         | -1.19         | 1.55         | 3.84         |
| -0.68       | -0.22         | -0.59         | -0.25        | 0.59          | -0.96        | -0.66        |
| -0.54       | -0.04         | -0.28         | -0.08        | -0.39         | 0.96         | -0.42        |
| 0.93        | 0.74          | 1.18          | -0.06        | -0.45         | 1.19         | 0.82         |
| -0.19       | 0.39          | -0.62         | -0.21        | -0.80         | -0.45        | -0.28        |
| 0.02        | 0.12          | -0.25         | -0.22        | 0.05          | 1.49         | -0.07        |
| -0.90       | 3.16          | -0.25         | -0.23        | -1.28         | -0.30        | -0.06        |
| -0.57       | 1.19          | 2.98          | 4.98         | -0.66         | 1.17         | 2.06         |
| -0.30       | -0.94         | -0.48         | -0.23        | 1.94          | -0.47        | -0.40        |
| 0.08        | 0.33          | -0.68         | -0.27        | -0.25         | -0.99        | -0.53        |
| 0.06        | -0.12         | -0.64         | -0.24        | 0.23          | -0.61        | -0.29        |
| -0.45       | -0.40         | -0.67         | -0.23        | 0.88          | -0.88        | -0.41        |
| 0.26        | -1.44         | -0.39         | -0.21        | -0.36         | -0.52        | -0.63        |
| 1.36        | 0.10          | -0.49         | -0.21        | -1.42         | 0.19         | 0.17         |
| -0.50       | -0.47         | 2.24          | 0.03         | -0.64         | 1.59         | 0.87         |
| -0.64       | -0.76         | 19.45         | 7.70         | -1.17         | 2.58         | 0.85         |

|       |       |       |       |       |       |       |
|-------|-------|-------|-------|-------|-------|-------|
| -0.67 | 0.07  | 0.31  | -0.16 | -0.95 | 0.06  | -0.31 |
| -1.18 | -0.53 | -0.05 | -0.25 | -0.05 | -0.07 | -0.67 |
| -1.04 | -1.44 | -0.50 | -0.24 | 7.78  | 0.18  | -0.80 |
| -0.42 | 0.31  | 2.09  | -0.20 | -0.09 | 0.63  | -0.05 |
| 1.37  | -0.67 | 0.71  | -0.11 | -1.13 | 2.62  | 0.13  |
| 0.55  | 0.43  | -0.59 | -0.23 | -0.09 | -0.55 | -0.38 |
| 0.88  | 0.95  | -0.38 | -0.17 | -0.58 | -0.28 | 1.87  |
| 0.82  | 0.53  | -0.50 | -0.08 | -1.24 | -0.91 | -0.45 |
| -1.51 | -1.57 | -0.65 | -0.25 | 4.89  | -1.42 | -0.81 |
| 1.56  | 1.14  | -0.22 | -0.13 | -1.26 | -0.27 | 2.90  |
| 4.18  | 2.86  | 2.40  | -0.06 | -1.41 | 1.75  | 4.35  |
| -0.23 | 1.21  | -0.54 | -0.22 | -1.23 | -0.76 | -0.04 |
| 2.33  | 1.32  | -0.70 | -0.24 | -1.06 | -0.81 | -0.28 |
| 13.01 | 8.27  | -0.51 | -0.19 | -0.73 | -0.85 | 0.25  |
| 1.12  | -0.57 | -0.32 | -0.16 | -0.71 | -0.59 | -0.60 |
| 0.00  | 1.53  | 0.13  | -0.19 | -0.78 | 0.82  | 0.95  |
| -0.76 | 0.09  | -0.52 | -0.22 | 0.04  | -0.95 | -0.57 |
| -0.23 | -0.27 | -0.61 | -0.16 | -0.45 | -1.02 | -0.70 |
| -0.19 | 0.95  | -0.19 | 0.07  | -1.32 | 0.36  | 0.35  |
| 0.68  | 0.98  | -0.63 | -0.20 | -0.19 | -0.69 | -0.02 |
| -0.15 | 0.07  | -0.20 | -0.17 | 0.17  | 0.02  | 0.42  |
| -0.54 | 1.14  | -0.62 | -0.13 | -0.62 | -0.34 | 0.03  |
| 0.79  | 0.41  | -0.07 | -0.14 | -0.73 | 0.59  | 1.25  |
| 1.99  | -0.89 | -0.54 | -0.20 | -1.05 | -0.65 | -0.43 |
| 0.82  | -1.00 | -0.54 | -0.24 | -0.28 | -0.30 | -0.61 |
| 1.13  | -0.07 | -0.54 | -0.24 | -1.16 | 0.61  | 0.11  |
| -0.32 | -1.02 | -0.60 | -0.24 | 0.47  | -1.04 | -0.57 |
| -0.34 | -0.80 | -0.52 | -0.25 | -0.70 | -0.77 | -0.61 |
| -0.15 | -1.04 | -0.24 | -0.24 | 0.53  | -0.41 | -0.07 |
| -0.98 | 0.42  | 11.46 | 4.81  | -1.25 | 2.52  | 3.23  |
| 0.08  | -0.17 | -0.61 | -0.25 | -0.68 | -0.15 | -0.36 |
| 2.72  | 0.15  | -0.29 | -0.19 | -0.43 | 0.98  | 0.66  |
| 2.01  | -0.50 | -0.36 | -0.06 | -0.93 | 1.64  | 0.37  |
| -1.28 | -0.47 | 8.89  | 3.55  | -0.96 | 3.12  | 1.93  |
| -0.74 | -0.43 | -0.51 | -0.24 | 0.32  | -0.75 | -0.48 |
| -0.42 | -0.87 | -0.52 | -0.25 | 0.19  | -0.19 | -0.08 |
| -1.11 | -0.77 | -0.07 | -0.21 | -0.56 | 0.78  | -0.32 |
| -0.76 | 1.27  | -0.57 | -0.28 | 2.38  | -0.50 | -0.32 |
| 0.10  | -0.81 | 2.04  | -0.17 | -1.19 | 1.62  | 1.20  |
| -0.41 | -1.22 | 0.13  | -0.24 | 0.48  | 0.64  | -0.62 |
| 3.52  | -0.99 | -0.42 | -0.28 | 4.06  | 2.45  | -0.28 |
| 3.03  | -0.01 | -0.17 | -0.24 | 0.04  | 1.86  | 0.07  |
| 0.21  | -0.84 | -0.51 | -0.26 | 1.30  | -0.29 | -0.52 |
| -1.21 | -0.68 | -0.07 | -0.01 | 0.30  | 0.21  | 1.79  |
| -0.72 | -1.01 | -0.15 | -0.24 | -0.10 | 0.02  | -0.01 |
| 0.42  | 0.80  | 0.17  | -0.24 | 0.01  | 0.45  | 1.35  |
| 3.88  | 2.31  | -0.60 | -0.25 | -0.21 | -1.55 | -0.72 |
| -0.54 | 0.22  | -0.02 | -0.22 | -0.25 | 0.34  | 0.19  |
| -0.99 | 1.40  | -0.23 | -0.24 | -1.25 | -0.02 | -0.02 |
| -1.31 | -0.11 | 0.18  | -0.24 | -0.24 | -1.13 | -0.59 |
| 0.51  | 0.88  | 0.75  | 0.12  | -1.36 | 2.84  | 1.60  |
| -0.38 | 0.65  | 0.03  | -0.04 | -1.38 | 0.39  | 0.18  |
| -0.86 | -0.20 | -0.42 | -0.13 | -0.68 | -0.62 | -0.58 |
| -0.25 | -0.18 | -0.32 | -0.06 | -0.92 | -0.06 | 0.03  |
| -0.95 | 0.59  | -0.64 | -0.18 | -0.47 | -0.81 | 0.58  |
| -0.03 | 1.82  | 4.01  | 6.06  | -1.30 | 0.80  | 5.08  |
| -1.29 | -0.22 | 6.09  | 8.26  | -1.03 | 2.14  | 3.34  |
| 0.03  | 0.52  | -0.51 | -0.19 | -0.37 | -0.49 | 0.03  |
| -0.08 | 0.53  | -0.48 | -0.18 | -1.06 | -0.18 | 0.30  |

|       |       |       |       |       |       |       |
|-------|-------|-------|-------|-------|-------|-------|
| -0.44 | -0.77 | -0.50 | -0.20 | -0.09 | -0.53 | -0.09 |
| -0.52 | 1.02  | -0.18 | -0.23 | -0.96 | 0.73  | 0.61  |
| -0.15 | -0.11 | -0.48 | -0.21 | -0.83 | -0.18 | -0.15 |
| -1.14 | 0.80  | -0.21 | -0.19 | -0.30 | 0.12  | -0.30 |
| -0.89 | -0.90 | -0.58 | -0.25 | -0.03 | -1.01 | -0.58 |
| -0.26 | -0.05 | -0.63 | -0.21 | -0.46 | -0.82 | -0.30 |
| -0.49 | 0.09  | -0.09 | -0.24 | -0.70 | 0.19  | -0.45 |
| 0     | -1    | 0     | 0     | -1    | 0     | 3     |

---

| 61            | 62           | 63           | 64            | 65           | 66           | 67          |
|---------------|--------------|--------------|---------------|--------------|--------------|-------------|
| 91            | 90           | 19           | 82            | 66           | 11           | 114         |
| ACCACTGACCGT  | TGAGGTAGGAGG | CAAAGAATTCTC | ACTCGGCGTGGCC | CAAAGTGCTTAC | TGAGGTAGTAGT | CAAAGTGCTCA |
| miR-181a-2-3p | let-7e-5p    | miR-186-5p   | miR-1307-3p   | miR-17-5p    | let-7i-5p    | miR-20b-5p  |
| 36605         | 37943        | 979581       | 51847         | 87898        | 2186845      | 19721       |
| -0.46         | -0.64        | 0.09         | 0.64          | -0.65        | 1.45         | -0.65       |
| -1.63         | -0.49        | 0.03         | -1.76         | -0.98        | -0.89        | -1.33       |
| -0.70         | -0.64        | 0.71         | -0.83         | 1.93         | 0.90         | 2.10        |
| -1.06         | -0.60        | -0.64        | -0.60         | -0.36        | 1.29         | 0.65        |
| -0.67         | 1.06         | -0.43        | -1.62         | 1.12         | -0.75        | 0.43        |
| -0.61         | -0.07        | -1.04        | -0.56         | -1.04        | 2.33         | -0.97       |
| 0.20          | 1.44         | -1.09        | 0.99          | -0.73        | 1.19         | -0.90       |
| -0.28         | -0.46        | -0.87        | 0.81          | -0.97        | -0.93        | -1.06       |
| -1.27         | -0.92        | -0.22        | -0.82         | -0.55        | -0.55        | 0.14        |
| -0.45         | -1.03        | 0.51         | -0.93         | 0.48         | 0.07         | 0.25        |
| -0.50         | 0.12         | 1.40         | -0.37         | 0.08         | -0.98        | 0.86        |
| 0.70          | 0.88         | -0.81        | 0.50          | -1.29        | 0.17         | -1.20       |
| -0.40         | -0.64        | 2.54         | 0.10          | 1.55         | 1.92         | 0.32        |
| 0.25          | 0.17         | -0.92        | 1.12          | -0.96        | -1.09        | -0.91       |
| -0.65         | -0.40        | 0.42         | -0.55         | 0.96         | -0.14        | 1.15        |
| -0.11         | -0.45        | 1.89         | 0.50          | 1.19         | 0.07         | 0.59        |
| 1.91          | -0.52        | -0.30        | 0.57          | -0.45        | -0.50        | -0.20       |
| 0.91          | 0.02         | -0.46        | 1.25          | 1.49         | -0.25        | 0.93        |
| 0.81          | -0.87        | 0.75         | -0.43         | -0.30        | -0.64        | -0.28       |
| 0.54          | -0.89        | 1.09         | -0.16         | 1.17         | -0.75        | 1.59        |
| 1.52          | -0.54        | -0.79        | 0.05          | -0.47        | 1.39         | -0.46       |
| 2.31          | 2.21         | -0.70        | 1.82          | -0.99        | -0.65        | -0.92       |
| 1.45          | 0.45         | -0.68        | 1.08          | -0.61        | -0.30        | -0.55       |
| 0.47          | -0.30        | -1.05        | 1.85          | -0.88        | -0.51        | -0.74       |
| -0.65         | 3.11         | -0.94        | -1.41         | -0.52        | -1.42        | -0.78       |
| -0.45         | 0.59         | -0.01        | -0.21         | 0.19         | -0.36        | -0.29       |
| -1.18         | -0.56        | 1.52         | -1.03         | 1.59         | -0.07        | 2.22        |
| -1.35         | -0.61        | 2.29         | -1.23         | 2.58         | 0.27         | 4.25        |
| -0.71         | -0.37        | 1.37         | -0.75         | 0.06         | 0.10         | 0.11        |
| 0.63          | -1.21        | -0.14        | -1.36         | -0.07        | 0.12         | 0.59        |
| -0.99         | -0.78        | -1.00        | -1.51         | 0.18         | 0.76         | 0.91        |
| 3.75          | 0.02         | 1.28         | -1.63         | 0.63         | 0.97         | 3.39        |
| -1.49         | 3.63         | 0.34         | -1.59         | 2.62         | -0.85        | 3.13        |
| -1.23         | -0.99        | -0.63        | 1.04          | -0.55        | -0.58        | -0.72       |
| -0.97         | -1.25        | -0.36        | 0.77          | -0.28        | -0.29        | -0.44       |
| 0.85          | -0.45        | -0.10        | 0.75          | -0.91        | -0.44        | -1.07       |
| -1.48         | -0.79        | -1.40        | -0.54         | -1.42        | -0.94        | -1.22       |
| -0.30         | -1.01        | 0.17         | -0.48         | -0.27        | 3.02         | -0.54       |
| 0.06          | -1.09        | 2.29         | -0.28         | 1.75         | 2.96         | 0.85        |



|       |       |       |       |       |       |       |
|-------|-------|-------|-------|-------|-------|-------|
| 1.39  | -0.60 | 0.28  | 0.10  | -0.76 | -1.02 | -0.79 |
| 2.14  | 0.30  | -1.37 | 3.97  | -0.81 | 2.41  | -0.80 |
| 5.08  | 1.80  | -1.42 | 11.09 | -0.85 | 11.30 | -0.89 |
| 0.60  | -0.19 | -0.52 | 0.77  | -0.59 | -0.23 | -0.59 |
| -0.51 | -0.99 | 1.34  | 0.07  | 0.82  | 1.88  | 0.18  |
| 2.08  | 0.02  | -0.53 | -0.04 | -0.95 | -1.29 | -1.07 |
| 0.08  | -0.33 | -1.41 | 2.72  | -1.02 | 0.47  | -1.00 |
| 0.89  | -0.01 | 1.57  | -0.14 | 0.36  | -0.81 | -0.02 |
| 1.10  | -0.41 | -0.49 | 1.23  | -0.69 | -0.60 | -0.90 |
| -0.50 | -0.94 | 0.40  | 0.47  | 0.02  | -0.72 | -0.29 |
| -0.05 | -0.94 | -0.09 | 0.72  | -0.34 | -0.87 | -0.49 |
| 2.81  | -0.93 | 0.40  | 0.27  | 0.59  | -0.49 | 0.15  |
| 0.21  | 0.21  | -0.69 | 1.56  | -0.65 | 0.00  | -0.85 |
| -0.12 | 0.62  | -0.98 | 0.13  | -0.30 | 0.22  | -0.30 |
| 0.14  | -0.26 | 0.23  | 0.59  | 0.61  | 0.48  | -0.25 |
| 1.71  | 0.59  | -0.82 | 0.14  | -1.04 | -0.06 | -0.98 |
| 1.11  | 0.25  | -0.74 | -0.21 | -0.77 | -0.74 | -0.39 |
| 0.06  | 0.17  | -0.32 | -0.44 | -0.41 | 0.94  | -0.41 |
| -0.48 | -0.70 | 3.12  | -1.08 | 2.52  | 0.26  | 3.54  |
| 0.28  | 1.06  | 0.25  | -0.11 | -0.15 | -0.56 | -0.55 |
| -0.07 | 0.70  | 1.17  | -1.29 | 0.98  | 0.22  | 0.24  |
| -0.46 | 0.52  | 1.04  | -1.49 | 1.64  | -0.76 | 0.28  |
| -0.70 | -1.04 | 3.62  | -1.23 | 3.12  | 0.09  | 6.13  |
| 0.22  | -0.42 | -0.70 | -0.30 | -0.75 | -0.92 | -0.58 |
| -0.72 | -0.08 | 0.08  | -0.74 | -0.19 | 0.66  | -0.32 |
| -0.58 | -0.74 | 0.59  | -1.20 | 0.78  | 0.58  | 1.52  |
| 2.73  | 0.02  | -0.68 | 1.55  | -0.50 | 6.00  | -0.21 |
| -1.55 | -1.26 | 2.16  | -1.05 | 1.62  | 2.28  | 0.94  |
| -0.16 | -0.56 | -0.32 | -1.76 | 0.64  | 1.32  | 2.11  |
| -0.08 | 0.65  | -0.64 | -0.92 | 2.45  | 2.35  | 2.51  |
| 0.03  | 0.41  | 1.01  | -0.17 | 1.86  | 1.34  | 3.05  |
| -0.16 | 0.04  | -0.59 | -0.13 | -0.29 | 1.24  | -0.43 |
| 2.38  | -1.12 | 0.22  | -1.53 | 0.21  | 2.54  | -0.56 |
| -0.41 | -0.72 | 0.08  | -0.82 | 0.02  | 1.56  | -0.37 |
| 0.21  | -0.53 | 1.05  | 0.11  | 0.45  | 0.06  | -0.07 |
| 1.49  | -0.59 | -1.42 | 9.10  | -1.55 | 1.47  | -1.33 |
| -0.27 | 0.19  | 0.30  | -0.03 | 0.34  | 1.23  | 0.04  |
| -0.60 | -0.63 | 0.15  | -1.08 | -0.02 | -0.49 | 0.59  |
| 1.47  | 0.72  | -0.21 | -1.47 | -1.13 | -0.28 | -1.02 |
| 0.15  | -0.93 | 1.07  | 0.19  | 2.84  | 0.44  | 3.65  |
| 0.33  | -0.18 | 1.18  | -0.47 | 0.39  | -0.71 | -0.04 |
| -0.65 | -0.23 | -0.51 | 0.26  | -0.62 | -1.18 | 0.02  |
| 0.45  | -0.42 | 0.15  | -0.13 | -0.06 | -0.03 | -0.16 |
| 0.03  | -0.57 | -0.74 | 1.59  | -0.81 | -0.97 | -0.78 |
| 0.42  | -0.93 | 1.32  | -0.49 | 0.80  | -0.08 | 0.64  |
| -1.12 | -1.14 | 0.86  | -1.20 | 2.14  | -0.12 | 3.00  |
| 0.84  | -0.39 | 0.40  | 0.65  | -0.49 | -1.08 | -0.56 |
| 0.17  | -0.53 | 0.23  | 0.05  | -0.18 | -0.44 | -0.42 |
| -2.04 | -0.80 | -0.26 | -0.40 | -0.53 | 0.13  | -0.41 |
| 0.99  | -0.92 | 1.24  | -0.19 | 0.73  | -0.15 | 0.45  |
| 0.62  | 0.37  | 0.09  | 0.13  | -0.18 | -0.73 | -0.29 |
| 1.24  | 0.80  | 0.14  | -1.00 | 0.12  | 1.26  | 0.77  |
| 2.90  | -0.86 | -0.79 | 0.00  | -1.01 | 0.58  | -0.83 |
| 3.08  | 1.34  | -0.57 | 0.86  | -0.82 | -0.27 | -0.77 |
| -0.08 | -0.43 | 0.58  | -0.81 | 0.19  | -0.07 | 1.39  |
| 0.05  | -1.18 | 2.62  | -0.55 | 0.20  | 2.97  | -0.16 |
| 0.27  | 0.27  | 0.27  | 0.27  | 0.28  | 0.28  | 0.28  |
| 0.12  | 0.12  | 0.27  | 0.15  | 0.33  | 0.32  | 0.24  |











































































































































































|         |        |         |         |         |       |       |
|---------|--------|---------|---------|---------|-------|-------|
| 721119  | 27468  | 816795  | 972175  | 1468719 | 887   | 19904 |
|         |        |         |         |         | 1     | 1     |
|         |        |         |         |         |       |       |
|         |        |         |         |         | 1     | 1     |
|         |        |         |         |         |       |       |
| 71      | 72     | 73      | 74      | 75      | 76    | 77    |
| 2       | 3      | 4       | 5       | 6       | 7     | 8     |
| A_12    | A_18   | A_3     | A_5     | A_6     | A_8   | A_9   |
| CHR_P   | CHR_P  | CHR_P   | CHR_P   | CHR_P   | CHR_P | CHR_P |
| 2271250 | 356761 | 5807356 | 3122435 | 4486274 | 3080  | 82291 |
| 0.07    | 0.24   | 0.03    | 0.85    | 0.97    | 0.24  | 0.12  |
| A_12    | A_18   | A_3     | A_5     | A_6     | A_8   | A_9   |
| 1550131 | 329293 | 4990561 | 2150260 | 3017555 | 2193  | 62387 |
| 261344  | 6469   | 132111  | 198821  | 807275  | 155   | 7754  |
| 13505   | 8375   | 34328   | 58994   | 36332   | 44    | 431   |
| 7691    | 750    | 35614   | 51330   | 51941   | 53    | 2064  |
| 14227   | 1228   | 168094  | 97543   | 91415   | 92    | 1547  |
| 12291   | 536    | 64203   | 87260   | 63497   | 60    | 1310  |
| 86372   | 452    | 20677   | 38724   | 17647   | 43    | 10    |
| 15656   | 647    | 22001   | 51972   | 34873   | 51    | 94    |
| 24861   | 117    | 4457    | 7468    | 4352    | 11    | 10    |
| 49674   | 88     | 6761    | 18115   | 20373   | 13    | 17    |
| 80322   | 1803   | 36876   | 40293   | 52728   | 42    | 934   |
| 24136   | 674    | 26458   | 23921   | 36895   | 23    | 288   |
| 8992    | 204    | 26259   | 32101   | 21912   | 27    | 178   |
| 5991    | 139    | 30575   | 25249   | 21818   | 23    | 63    |
| 9409    | 238    | 38899   | 20915   | 21332   | 15    | 609   |
| 3972    | 189    | 9342    | 9807    | 6502    | 13    | 17    |
| 1658    | 7      | 2939    | 3906    | 12372   | 2     | 380   |
| 4083    | 91     | 5496    | 12964   | 5382    | 10    | 8     |
| 3990    | 345    | 13701   | 17197   | 10384   | 13    | 54    |
| 9484    | 119    | 2645    | 8526    | 5314    | 9     | 17    |
| 4091    | 768    | 2897    | 7001    | 9014    | 6     | 152   |
| 2473    | 149    | 3338    | 6047    | 4666    | 7     | 62    |
| 5947    | 167    | 10042   | 10806   | 10705   | 11    | 50    |
| 3135    | 126    | 869     | 3590    | 6023    | 3     | 226   |
| 3250    | 109    | 2006    | 9031    | 3612    | 4     | 92    |
| 2971    | 300    | 1547    | 5495    | 2202    | 6     | 42    |
| 4140    | 22     | 1660    | 3495    | 8134    | 7     | 459   |
| 1563    | 58     | 9033    | 4396    | 5415    | 2     | 229   |
| 2972    | 204    | 2727    | 3487    | 1953    | 26    | 265   |
| 1962    | 124    | 6624    | 5075    | 2833    | 4     | 46    |
| 2288    | 86     | 1596    | 2878    | 5088    | 3     | 14    |
| 1545    | 37     | 2190    | 5104    | 3250    | 4     | 20    |
| 513     | 18     | 9944    | 5368    | 4663    | 8     | 47    |
| 3180    | 9      | 1671    | 3742    | 2217    | 6     | 0     |
| 2604    | 32     | 547     | 1978    | 1123    | 4     | 2     |
| 1315    | 86     | 4632    | 3492    | 1949    | 1     | 33    |
| 2471    | 193    | 15156   | 5512    | 4119    | 4     | 48    |
| 3383    | 483    | 2811    | 3748    | 2187    | 5     | 11    |
| 3737    | 399    | 1795    | 3909    | 2191    | 1     | 38    |
| 479     | 145    | 911     | 2595    | 3401    | 2     | 6     |
| 470     | 12     | 4393    | 2097    | 3374    | 5     | 346   |
| 718     | 114    | 3445    | 5257    | 3705    | 4     | 94    |
| 344     | 10     | 1815    | 2919    | 1895    | 1     | 70    |
| 1017    | 63     | 3797    | 3856    | 2949    | 4     | 23    |
| 909     | 79     | 711     | 712     | 491     | 0     | 3     |
| 1334    | 103    | 1435    | 2476    | 1914    | 5     | 161   |

|      |     |      |      |      |   |     |
|------|-----|------|------|------|---|-----|
| 750  | 34  | 1382 | 3150 | 2764 | 2 | 20  |
| 1003 | 16  | 858  | 1667 | 1540 | 0 | 1   |
| 515  | 24  | 1322 | 2479 | 3433 | 3 | 63  |
| 124  | 1   | 981  | 727  | 791  | 0 | 1   |
| 350  | 8   | 45   | 410  | 628  | 0 | 113 |
| 664  | 14  | 1172 | 1836 | 1881 | 6 | 4   |
| 509  | 31  | 663  | 1584 | 478  | 1 | 6   |
| 1145 | 63  | 1159 | 1265 | 966  | 1 | 8   |
| 382  | 52  | 524  | 2087 | 1910 | 6 | 526 |
| 382  | 0   | 12   | 46   | 747  | 0 | 36  |
| 255  | 3   | 43   | 126  | 213  | 0 | 3   |
| 890  | 24  | 939  | 1409 | 670  | 1 | 4   |
| 247  | 7   | 368  | 1337 | 733  | 2 | 1   |
| 409  | 37  | 823  | 1500 | 1214 | 0 | 12  |
| 147  | 66  | 925  | 1334 | 1512 | 1 | 30  |
| 578  | 16  | 1649 | 1798 | 1255 | 0 | 1   |
| 275  | 6   | 243  | 634  | 550  | 2 | 14  |
| 792  | 9   | 94   | 207  | 129  | 0 | 2   |
| 61   | 1   | 7    | 37   | 41   | 0 | 0   |
| 198  | 31  | 2408 | 869  | 2392 | 0 | 19  |
| 747  | 19  | 1011 | 1035 | 622  | 3 | 0   |
| 637  | 3   | 199  | 376  | 232  | 0 | 0   |
| 330  | 6   | 544  | 646  | 372  | 0 | 0   |
| 307  | 8   | 420  | 957  | 366  | 2 | 8   |
| 888  | 111 | 387  | 591  | 411  | 0 | 2   |
| 309  | 21  | 537  | 548  | 538  | 0 | 15  |
| 289  | 9   | 1862 | 954  | 1361 | 3 | 1   |
| 464  | 16  | 291  | 468  | 257  | 0 | 1   |
| 527  | 8   | 301  | 336  | 718  | 2 | 14  |
| 244  | 7   | 228  | 798  | 314  | 1 | 0   |
| 179  | 5   | 741  | 1033 | 816  | 0 | 49  |
| 288  | 0   | 16   | 43   | 409  | 0 | 18  |
| 157  | 107 | 109  | 254  | 256  | 0 | 11  |
| 49   | 2   | 659  | 614  | 566  | 1 | 15  |
| 231  | 15  | 347  | 262  | 158  | 0 | 3   |
| 385  | 4   | 658  | 949  | 398  | 2 | 1   |
| 111  | 0   | 142  | 322  | 526  | 0 | 53  |
| 88   | 28  | 1066 | 638  | 675  | 0 | 3   |
| 423  | 3   | 33   | 138  | 113  | 0 | 1   |
| 239  | 13  | 98   | 367  | 177  | 0 | 3   |
| 162  | 0   | 189  | 346  | 384  | 2 | 10  |
| 116  | 10  | 367  | 406  | 416  | 0 | 9   |
| 402  | 1   | 283  | 467  | 199  | 0 | 0   |
| 273  | 5   | 282  | 579  | 312  | 0 | 0   |
| 38   | 6   | 413  | 439  | 560  | 0 | 5   |
| 43   | 6   | 184  | 232  | 337  | 2 | 75  |
| 17   | 0   | 19   | 9    | 22   | 0 | 0   |
| 111  | 1   | 91   | 322  | 382  | 0 | 7   |
| 269  | 6   | 80   | 215  | 192  | 0 | 0   |
| 159  | 0   | 43   | 107  | 72   | 0 | 1   |
| 97   | 4   | 111  | 350  | 122  | 0 | 1   |
| 26   | 6   | 148  | 215  | 265  | 0 | 5   |
| 58   | 11  | 245  | 323  | 352  | 0 | 29  |
| 48   | 15  | 343  | 406  | 296  | 0 | 27  |
| 93   | 0   | 39   | 66   | 31   | 0 | 0   |
| 238  | 2   | 548  | 373  | 221  | 0 | 0   |
| 104  | 1   | 93   | 182  | 124  | 0 | 1   |
| 79   | 1   | 201  | 227  | 212  | 0 | 36  |
| 65   | 19  | 200  | 306  | 162  | 0 | 5   |

|     |   |     |     |     |   |    |
|-----|---|-----|-----|-----|---|----|
| 287 | 4 | 147 | 300 | 198 | 0 | 0  |
| 247 | 3 | 122 | 165 | 126 | 0 | 0  |
| 66  | 8 | 112 | 234 | 170 | 0 | 4  |
| 86  | 7 | 85  | 159 | 91  | 0 | 0  |
| 144 | 0 | 154 | 203 | 124 | 0 | 0  |
| 93  | 0 | 81  | 133 | 106 | 0 | 0  |
| 57  | 4 | 67  | 237 | 82  | 1 | 1  |
| 48  | 3 | 187 | 260 | 209 | 1 | 3  |
| 80  | 2 | 200 | 293 | 186 | 1 | 9  |
| 126 | 7 | 230 | 314 | 102 | 0 | 0  |
| 14  | 3 | 50  | 146 | 94  | 1 | 3  |
| 42  | 7 | 282 | 229 | 237 | 0 | 9  |
| 50  | 3 | 81  | 158 | 96  | 0 | 1  |
| 101 | 1 | 123 | 220 | 98  | 1 | 2  |
| 101 | 1 | 123 | 220 | 98  | 1 | 2  |
| 116 | 4 | 211 | 195 | 87  | 0 | 6  |
| 271 | 2 | 81  | 98  | 161 | 0 | 3  |
| 71  | 3 | 77  | 185 | 266 | 0 | 10 |
| 69  | 1 | 15  | 72  | 99  | 0 | 0  |
| 55  | 5 | 27  | 111 | 109 | 0 | 3  |
| 3   | 0 | 2   | 5   | 14  | 0 | 0  |
| 30  | 2 | 174 | 222 | 165 | 0 | 1  |
| 72  | 2 | 45  | 71  | 50  | 0 | 1  |
| 34  | 0 | 68  | 115 | 153 | 0 | 1  |
| 32  | 5 | 170 | 162 | 116 | 0 | 9  |
| 4   | 3 | 71  | 160 | 113 | 0 | 0  |
| 20  | 1 | 4   | 5   | 26  | 0 | 0  |
| 48  | 2 | 74  | 221 | 151 | 0 | 16 |
| 60  | 2 | 36  | 85  | 53  | 0 | 3  |
| 46  | 4 | 84  | 115 | 84  | 0 | 2  |
| 150 | 0 | 21  | 129 | 51  | 0 | 0  |
| 22  | 0 | 29  | 98  | 83  | 0 | 4  |
| 43  | 0 | 21  | 29  | 64  | 0 | 11 |
| 88  | 0 | 89  | 82  | 152 | 1 | 1  |
| 34  | 1 | 54  | 94  | 78  | 0 | 0  |
| 26  | 2 | 66  | 85  | 74  | 1 | 0  |
| 22  | 1 | 12  | 25  | 124 | 0 | 7  |
| 65  | 1 | 42  | 52  | 43  | 0 | 0  |
| 13  | 0 | 187 | 93  | 132 | 0 | 21 |
| 11  | 1 | 59  | 154 | 86  | 0 | 1  |
| 28  | 0 | 9   | 9   | 4   | 0 | 0  |
| 30  | 0 | 220 | 73  | 148 | 0 | 1  |
| 15  | 0 | 82  | 196 | 93  | 0 | 1  |
| 20  | 1 | 21  | 80  | 50  | 0 | 0  |
| 38  | 0 | 128 | 105 | 109 | 0 | 0  |
| 32  | 2 | 273 | 128 | 104 | 0 | 2  |
| 51  | 1 | 5   | 27  | 26  | 0 | 1  |
| 57  | 0 | 96  | 108 | 31  | 0 | 0  |
| 49  | 0 | 4   | 35  | 68  | 0 | 2  |
| 11  | 0 | 33  | 99  | 80  | 0 | 2  |
| 4   | 0 | 13  | 52  | 38  | 0 | 23 |
| 41  | 2 | 120 | 58  | 54  | 0 | 0  |
| 15  | 4 | 77  | 44  | 33  | 0 | 0  |
| 37  | 1 | 75  | 39  | 27  | 0 | 2  |
| 32  | 0 | 48  | 95  | 66  | 0 | 3  |
| 31  | 1 | 23  | 22  | 102 | 0 | 6  |
| 4   | 0 | 4   | 7   | 12  | 0 | 0  |
| 17  | 1 | 43  | 74  | 43  | 0 | 1  |
| 10  | 2 | 63  | 46  | 34  | 0 | 1  |



|     |   |     |     |     |   |    |
|-----|---|-----|-----|-----|---|----|
| 38  | 0 | 17  | 52  | 43  | 0 | 0  |
| 14  | 1 | 11  | 68  | 18  | 0 | 0  |
| 16  | 2 | 82  | 51  | 112 | 0 | 1  |
| 11  | 0 | 48  | 65  | 45  | 0 | 1  |
| 238 | 2 | 14  | 14  | 29  | 0 | 1  |
| 18  | 1 | 2   | 10  | 5   | 0 | 0  |
| 43  | 1 | 65  | 68  | 109 | 0 | 0  |
| 6   | 0 | 17  | 25  | 13  | 0 | 1  |
| 54  | 0 | 8   | 35  | 49  | 0 | 2  |
| 15  | 2 | 28  | 32  | 50  | 0 | 5  |
| 15  | 0 | 16  | 31  | 22  | 0 | 0  |
| 14  | 1 | 2   | 46  | 35  | 0 | 0  |
| 9   | 0 | 53  | 60  | 63  | 1 | 0  |
| 45  | 0 | 83  | 96  | 63  | 0 | 1  |
| 22  | 1 | 23  | 46  | 16  | 0 | 0  |
| 56  | 2 | 24  | 34  | 19  | 0 | 0  |
| 19  | 0 | 58  | 56  | 44  | 0 | 2  |
| 0   | 1 | 41  | 47  | 31  | 0 | 1  |
| 20  | 0 | 13  | 22  | 15  | 0 | 0  |
| 28  | 0 | 30  | 76  | 54  | 0 | 6  |
| 67  | 1 | 30  | 28  | 12  | 0 | 0  |
| 28  | 5 | 48  | 48  | 36  | 0 | 10 |
| 17  | 0 | 49  | 55  | 45  | 0 | 4  |
| 17  | 0 | 13  | 21  | 13  | 0 | 0  |
| 25  | 0 | 106 | 112 | 88  | 0 | 4  |
| 8   | 0 | 23  | 30  | 23  | 0 | 0  |
| 4   | 0 | 2   | 12  | 17  | 0 | 0  |
| 99  | 2 | 16  | 29  | 62  | 0 | 1  |
| 32  | 1 | 5   | 7   | 1   | 0 | 0  |
| 17  | 1 | 52  | 80  | 20  | 0 | 0  |
| 4   | 1 | 36  | 75  | 48  | 0 | 0  |
| 38  | 0 | 17  | 21  | 58  | 0 | 0  |
| 4   | 2 | 25  | 35  | 23  | 0 | 0  |
| 7   | 0 | 1   | 9   | 11  | 0 | 2  |
| 15  | 0 | 66  | 46  | 38  | 0 | 0  |
| 22  | 1 | 21  | 50  | 21  | 0 | 1  |
| 13  | 0 | 17  | 64  | 27  | 0 | 0  |
| 0   | 0 | 24  | 50  | 23  | 0 | 0  |
| 21  | 0 | 11  | 32  | 32  | 0 | 0  |
| 4   | 1 | 96  | 44  | 64  | 0 | 2  |
| 6   | 0 | 2   | 36  | 24  | 0 | 17 |
| 34  | 1 | 49  | 37  | 11  | 0 | 0  |
| 19  | 0 | 16  | 26  | 80  | 0 | 1  |
| 11  | 0 | 38  | 30  | 26  | 0 | 0  |
| 10  | 0 | 52  | 60  | 43  | 0 | 0  |
| 11  | 0 | 15  | 46  | 20  | 0 | 0  |
| 30  | 0 | 101 | 29  | 60  | 0 | 4  |
| 9   | 1 | 64  | 63  | 65  | 0 | 3  |
| 6   | 0 | 8   | 41  | 15  | 0 | 0  |
| 20  | 0 | 22  | 32  | 24  | 0 | 0  |
| 5   | 0 | 65  | 44  | 35  | 0 | 2  |
| 8   | 0 | 4   | 9   | 13  | 0 | 0  |
| 3   | 1 | 9   | 25  | 23  | 0 | 0  |
| 4   | 0 | 4   | 9   | 16  | 0 | 0  |
| 3   | 2 | 0   | 23  | 21  | 0 | 1  |
| 0   | 0 | 1   | 0   | 0   | 0 | 0  |
| 4   | 0 | 28  | 30  | 32  | 0 | 0  |
| 17  | 1 | 1   | 7   | 11  | 0 | 0  |
| 27  | 0 | 22  | 29  | 35  | 0 | 0  |

|    |   |    |    |    |   |   |
|----|---|----|----|----|---|---|
| 18 | 0 | 14 | 35 | 14 | 0 | 1 |
| 30 | 1 | 38 | 26 | 25 | 0 | 0 |
| 11 | 0 | 43 | 66 | 44 | 0 | 0 |
| 3  | 0 | 8  | 14 | 21 | 1 | 1 |
| 4  | 0 | 40 | 25 | 20 | 0 | 2 |
| 6  | 0 | 16 | 18 | 37 | 0 | 1 |
| 4  | 0 | 43 | 39 | 29 | 0 | 0 |
| 27 | 3 | 20 | 16 | 17 | 0 | 0 |
| 21 | 0 | 3  | 11 | 2  | 0 | 0 |
| 8  | 2 | 35 | 16 | 26 | 0 | 0 |
| 8  | 0 | 2  | 1  | 2  | 0 | 0 |
| 7  | 0 | 9  | 16 | 24 | 0 | 0 |
| 5  | 0 | 1  | 8  | 20 | 0 | 0 |
| 12 | 0 | 23 | 17 | 30 | 0 | 1 |
| 3  | 0 | 9  | 13 | 8  | 0 | 0 |
| 5  | 0 | 8  | 17 | 10 | 0 | 1 |
| 5  | 0 | 4  | 16 | 8  | 0 | 0 |
| 3  | 0 | 10 | 20 | 25 | 0 | 0 |
| 13 | 1 | 27 | 42 | 35 | 0 | 3 |
| 21 | 0 | 5  | 8  | 16 | 0 | 0 |
| 14 | 0 | 6  | 18 | 5  | 0 | 0 |
| 12 | 0 | 3  | 14 | 10 | 0 | 0 |
| 12 | 0 | 3  | 14 | 10 | 0 | 0 |
| 4  | 0 | 25 | 19 | 22 | 0 | 0 |
| 6  | 0 | 44 | 20 | 10 | 0 | 1 |
| 2  | 0 | 11 | 9  | 5  | 0 | 1 |
| 4  | 0 | 16 | 20 | 18 | 0 | 0 |
| 4  | 0 | 5  | 12 | 9  | 0 | 0 |
| 3  | 0 | 4  | 23 | 11 | 0 | 0 |
| 10 | 0 | 6  | 22 | 15 | 0 | 1 |
| 9  | 0 | 14 | 9  | 13 | 0 | 0 |
| 1  | 0 | 5  | 3  | 21 | 0 | 0 |
| 5  | 1 | 5  | 23 | 5  | 0 | 0 |
| 1  | 0 | 2  | 6  | 13 | 0 | 0 |
| 5  | 0 | 15 | 19 | 11 | 0 | 1 |
| 19 | 1 | 14 | 11 | 11 | 0 | 0 |
| 3  | 0 | 0  | 1  | 1  | 0 | 0 |
| 10 | 0 | 27 | 24 | 20 | 0 | 0 |
| 10 | 0 | 7  | 28 | 8  | 0 | 0 |
| 1  | 0 | 10 | 14 | 6  | 0 | 0 |
| 4  | 0 | 43 | 25 | 16 | 0 | 0 |
| 10 | 0 | 4  | 24 | 8  | 0 | 0 |
| 2  | 1 | 7  | 20 | 18 | 0 | 5 |
| 5  | 0 | 17 | 20 | 7  | 0 | 0 |
| 13 | 0 | 7  | 13 | 15 | 0 | 0 |
| 1  | 0 | 17 | 4  | 15 | 0 | 0 |
| 0  | 0 | 0  | 1  | 0  | 0 | 0 |
| 1  | 0 | 3  | 6  | 8  | 0 | 3 |
| 3  | 1 | 39 | 15 | 20 | 0 | 0 |
| 5  | 0 | 51 | 18 | 18 | 0 | 0 |
| 3  | 0 | 20 | 22 | 30 | 0 | 0 |
| 6  | 0 | 11 | 14 | 10 | 0 | 0 |
| 0  | 0 | 2  | 1  | 1  | 0 | 0 |
| 6  | 0 | 51 | 31 | 13 | 0 | 0 |
| 7  | 0 | 3  | 12 | 16 | 0 | 0 |
| 4  | 0 | 69 | 1  | 4  | 0 | 3 |
| 1  | 1 | 49 | 8  | 14 | 0 | 0 |
| 6  | 0 | 9  | 23 | 5  | 0 | 1 |
| 4  | 1 | 15 | 9  | 7  | 0 | 0 |

|    |   |    |    |    |   |   |
|----|---|----|----|----|---|---|
| 7  | 0 | 15 | 13 | 7  | 0 | 0 |
| 3  | 0 | 16 | 8  | 13 | 0 | 1 |
| 5  | 0 | 16 | 30 | 30 | 0 | 0 |
| 4  | 0 | 1  | 5  | 10 | 0 | 0 |
| 6  | 1 | 20 | 10 | 13 | 0 | 0 |
| 2  | 0 | 5  | 11 | 11 | 0 | 1 |
| 5  | 0 | 2  | 11 | 15 | 0 | 0 |
| 8  | 0 | 12 | 17 | 17 | 0 | 0 |
| 5  | 0 | 0  | 4  | 0  | 0 | 0 |
| 4  | 0 | 9  | 4  | 5  | 0 | 0 |
| 2  | 1 | 1  | 3  | 0  | 0 | 0 |
| 1  | 0 | 20 | 15 | 14 | 0 | 0 |
| 12 | 0 | 5  | 9  | 5  | 0 | 0 |
| 0  | 0 | 2  | 7  | 18 | 1 | 1 |
| 6  | 0 | 8  | 13 | 14 | 0 | 5 |
| 9  | 0 | 7  | 7  | 1  | 0 | 0 |
| 1  | 1 | 15 | 11 | 20 | 0 | 0 |
| 5  | 0 | 4  | 5  | 6  | 0 | 0 |
| 6  | 0 | 1  | 4  | 13 | 0 | 0 |
| 13 | 0 | 9  | 17 | 7  | 0 | 0 |
| 1  | 0 | 3  | 8  | 10 | 0 | 0 |
| 4  | 0 | 17 | 18 | 9  | 0 | 0 |
| 0  | 0 | 1  | 10 | 11 | 0 | 0 |
| 4  | 0 | 17 | 7  | 11 | 0 | 0 |
| 3  | 0 | 8  | 4  | 11 | 0 | 0 |
| 0  | 0 | 11 | 5  | 5  | 0 | 0 |
| 6  | 1 | 14 | 11 | 20 | 0 | 0 |
| 2  | 0 | 4  | 10 | 5  | 0 | 0 |
| 5  | 0 | 4  | 21 | 8  | 0 | 0 |
| 0  | 0 | 3  | 7  | 7  | 0 | 0 |
| 2  | 0 | 6  | 6  | 7  | 0 | 1 |
| 4  | 0 | 2  | 6  | 1  | 0 | 0 |
| 2  | 0 | 0  | 1  | 2  | 0 | 0 |
| 4  | 2 | 10 | 12 | 10 | 0 | 0 |
| 4  | 1 | 15 | 9  | 3  | 0 | 1 |
| 8  | 2 | 14 | 9  | 16 | 0 | 0 |
| 2  | 0 | 3  | 7  | 6  | 0 | 1 |
| 2  | 0 | 2  | 5  | 8  | 0 | 0 |
| 1  | 0 | 7  | 6  | 6  | 0 | 0 |
| 1  | 0 | 1  | 3  | 9  | 0 | 0 |
| 6  | 0 | 2  | 7  | 6  | 0 | 0 |
| 1  | 0 | 4  | 11 | 7  | 0 | 0 |
| 2  | 0 | 4  | 6  | 12 | 0 | 0 |
| 0  | 0 | 3  | 7  | 12 | 0 | 0 |
| 4  | 0 | 10 | 16 | 12 | 0 | 0 |
| 11 | 0 | 8  | 7  | 0  | 0 | 1 |
| 5  | 0 | 12 | 6  | 4  | 0 | 0 |
| 10 | 0 | 14 | 9  | 10 | 0 | 1 |
| 3  | 0 | 10 | 7  | 4  | 0 | 0 |
| 0  | 0 | 4  | 16 | 9  | 0 | 0 |
| 0  | 0 | 14 | 6  | 10 | 0 | 0 |
| 6  | 0 | 0  | 1  | 2  | 0 | 0 |
| 1  | 0 | 7  | 9  | 7  | 0 | 0 |
| 7  | 1 | 0  | 5  | 2  | 0 | 0 |
| 2  | 0 | 1  | 3  | 3  | 0 | 0 |
| 1  | 0 | 1  | 3  | 1  | 0 | 0 |
| 0  | 0 | 6  | 6  | 7  | 0 | 0 |
| 1  | 0 | 0  | 0  | 0  | 0 | 0 |
| 2  | 0 | 3  | 4  | 17 | 0 | 3 |

|   |   |    |    |   |   |   |
|---|---|----|----|---|---|---|
| 4 | 0 | 1  | 6  | 6 | 0 | 0 |
| 2 | 0 | 10 | 8  | 5 | 0 | 0 |
| 1 | 0 | 1  | 3  | 3 | 0 | 0 |
| 1 | 0 | 3  | 4  | 3 | 0 | 0 |
| 2 | 0 | 2  | 4  | 6 | 0 | 0 |
| 0 | 0 | 0  | 1  | 5 | 0 | 0 |
| 7 | 0 | 6  | 6  | 5 | 0 | 0 |
| 3 | 0 | 2  | 7  | 3 | 0 | 0 |
| 8 | 0 | 14 | 8  | 6 | 0 | 1 |
| 3 | 0 | 5  | 8  | 6 | 0 | 0 |
| 1 | 0 | 1  | 5  | 5 | 0 | 0 |
| 3 | 0 | 2  | 7  | 2 | 0 | 0 |
| 2 | 4 | 6  | 13 | 1 | 0 | 0 |
| 1 | 0 | 0  | 0  | 0 | 0 | 0 |
| 0 | 0 | 7  | 26 | 2 | 0 | 0 |
| 9 | 0 | 2  | 8  | 7 | 0 | 1 |
| 0 | 0 | 5  | 14 | 4 | 0 | 0 |
| 5 | 1 | 3  | 4  | 5 | 0 | 0 |
| 2 | 0 | 2  | 3  | 3 | 0 | 0 |
| 2 | 1 | 1  | 11 | 6 | 0 | 0 |
| 0 | 0 | 0  | 4  | 3 | 0 | 0 |
| 0 | 0 | 0  | 5  | 3 | 0 | 0 |
| 2 | 0 | 6  | 7  | 1 | 0 | 0 |
| 3 | 0 | 10 | 7  | 2 | 0 | 0 |
| 0 | 0 | 5  | 9  | 5 | 0 | 0 |
| 0 | 0 | 3  | 9  | 6 | 0 | 0 |
| 1 | 0 | 0  | 5  | 0 | 0 | 0 |
| 1 | 0 | 0  | 2  | 1 | 0 | 0 |
| 1 | 0 | 1  | 4  | 5 | 0 | 4 |
| 1 | 0 | 1  | 3  | 2 | 0 | 0 |
| 2 | 0 | 2  | 2  | 3 | 0 | 0 |
| 2 | 0 | 8  | 5  | 4 | 0 | 0 |
| 1 | 0 | 1  | 3  | 2 | 0 | 0 |
| 3 | 0 | 3  | 4  | 4 | 0 | 0 |
| 2 | 0 | 3  | 0  | 1 | 0 | 0 |
| 3 | 0 | 6  | 3  | 7 | 0 | 0 |
| 0 | 0 | 1  | 0  | 1 | 0 | 0 |
| 2 | 0 | 7  | 4  | 7 | 0 | 0 |
| 2 | 0 | 2  | 4  | 6 | 0 | 0 |
| 0 | 1 | 4  | 4  | 6 | 0 | 0 |
| 0 | 0 | 3  | 2  | 1 | 0 | 0 |
| 0 | 0 | 2  | 5  | 5 | 1 | 0 |
| 2 | 0 | 2  | 9  | 5 | 0 | 0 |
| 1 | 0 | 1  | 4  | 4 | 0 | 0 |
| 1 | 0 | 0  | 0  | 2 | 0 | 0 |
| 2 | 0 | 1  | 4  | 0 | 0 | 0 |
| 0 | 0 | 4  | 5  | 3 | 0 | 0 |
| 0 | 0 | 1  | 2  | 2 | 0 | 0 |
| 1 | 0 | 0  | 2  | 1 | 0 | 0 |
| 0 | 0 | 0  | 4  | 3 | 0 | 0 |
| 0 | 0 | 12 | 5  | 8 | 0 | 0 |
| 0 | 0 | 1  | 8  | 2 | 0 | 0 |
| 5 | 0 | 0  | 1  | 1 | 0 | 0 |
| 2 | 0 | 3  | 10 | 7 | 0 | 0 |
| 0 | 0 | 1  | 8  | 3 | 0 | 0 |
| 3 | 0 | 0  | 4  | 0 | 0 | 2 |
| 1 | 0 | 0  | 3  | 0 | 0 | 0 |
| 1 | 1 | 0  | 7  | 5 | 0 | 0 |
| 2 | 0 | 3  | 3  | 0 | 0 | 0 |

|   |   |   |   |   |   |   |
|---|---|---|---|---|---|---|
| 1 | 0 | 4 | 5 | 4 | 0 | 0 |
| 3 | 0 | 1 | 1 | 1 | 0 | 1 |
| 0 | 0 | 0 | 8 | 0 | 0 | 0 |
| 0 | 0 | 1 | 5 | 1 | 0 | 0 |
| 1 | 0 | 0 | 5 | 4 | 0 | 0 |
| 2 | 0 | 7 | 3 | 3 | 0 | 0 |
| 1 | 0 | 0 | 0 | 1 | 0 | 0 |
| 0 | 0 | 1 | 4 | 1 | 0 | 0 |
| 0 | 0 | 3 | 7 | 0 | 0 | 0 |
| 0 | 0 | 0 | 1 | 5 | 0 | 0 |
| 0 | 0 | 0 | 1 | 4 | 0 | 0 |
| 1 | 0 | 0 | 1 | 1 | 0 | 0 |
| 0 | 0 | 0 | 1 | 2 | 0 | 0 |
| 0 | 0 | 0 | 2 | 3 | 0 | 0 |
| 0 | 0 | 1 | 0 | 3 | 0 | 0 |
| 1 | 0 | 2 | 2 | 3 | 0 | 0 |
| 1 | 1 | 5 | 4 | 1 | 0 | 0 |
| 1 | 0 | 5 | 2 | 1 | 0 | 0 |
| 0 | 0 | 0 | 0 | 0 | 0 | 0 |
| 3 | 0 | 2 | 3 | 0 | 0 | 0 |
| 0 | 0 | 4 | 8 | 0 | 0 | 0 |
| 3 | 0 | 1 | 2 | 0 | 0 | 0 |
| 0 | 0 | 0 | 0 | 6 | 0 | 0 |
| 1 | 0 | 1 | 1 | 2 | 0 | 0 |
| 2 | 0 | 2 | 1 | 6 | 0 | 0 |
| 0 | 0 | 0 | 0 | 0 | 0 | 0 |
| 0 | 0 | 0 | 0 | 1 | 0 | 0 |
| 1 | 1 | 1 | 3 | 2 | 0 | 0 |
| 0 | 0 | 5 | 0 | 1 | 0 | 0 |
| 0 | 0 | 4 | 1 | 2 | 0 | 0 |
| 0 | 0 | 0 | 0 | 0 | 0 | 0 |
| 2 | 0 | 0 | 3 | 4 | 0 | 0 |
| 1 | 0 | 4 | 5 | 2 | 0 | 0 |
| 1 | 0 | 5 | 1 | 4 | 0 | 0 |
| 0 | 0 | 2 | 3 | 5 | 0 | 0 |
| 1 | 0 | 2 | 2 | 0 | 0 | 1 |
| 3 | 0 | 5 | 1 | 6 | 0 | 0 |
| 1 | 0 | 0 | 1 | 4 | 0 | 0 |
| 1 | 0 | 0 | 1 | 3 | 0 | 0 |
| 2 | 0 | 3 | 2 | 7 | 0 | 0 |
| 1 | 0 | 0 | 2 | 1 | 0 | 0 |
| 0 | 0 | 0 | 0 | 4 | 0 | 0 |
| 1 | 0 | 1 | 7 | 0 | 0 | 1 |
| 1 | 0 | 0 | 0 | 0 | 0 | 0 |
| 2 | 0 | 2 | 0 | 5 | 0 | 0 |
| 1 | 0 | 0 | 4 | 2 | 0 | 0 |
| 0 | 0 | 2 | 0 | 2 | 0 | 0 |
| 0 | 0 | 2 | 2 | 0 | 0 | 0 |
| 0 | 0 | 2 | 1 | 4 | 0 | 0 |
| 0 | 0 | 0 | 0 | 2 | 0 | 0 |
| 1 | 0 | 0 | 3 | 1 | 0 | 0 |
| 0 | 0 | 2 | 2 | 0 | 0 | 0 |
| 0 | 0 | 2 | 5 | 3 | 0 | 0 |
| 3 | 1 | 0 | 2 | 3 | 0 | 0 |
| 1 | 0 | 2 | 1 | 1 | 0 | 0 |
| 1 | 0 | 0 | 2 | 0 | 0 | 0 |
| 2 | 0 | 0 | 0 | 1 | 0 | 0 |
| 1 | 0 | 4 | 3 | 3 | 0 | 0 |
| 1 | 0 | 2 | 0 | 2 | 0 | 0 |

|   |   |   |   |   |   |   |
|---|---|---|---|---|---|---|
| 2 | 0 | 0 | 3 | 1 | 0 | 0 |
| 3 | 0 | 0 | 1 | 1 | 0 | 1 |
| 0 | 0 | 1 | 1 | 2 | 0 | 0 |
| 7 | 0 | 1 | 1 | 3 | 0 | 0 |
| 0 | 0 | 1 | 1 | 0 | 0 | 0 |
| 1 | 0 | 0 | 2 | 1 | 0 | 0 |
| 0 | 0 | 0 | 0 | 2 | 0 | 0 |
| 3 | 0 | 0 | 2 | 0 | 0 | 0 |
| 1 | 0 | 0 | 3 | 1 | 0 | 0 |
| 1 | 0 | 3 | 0 | 0 | 0 | 0 |
| 0 | 0 | 1 | 0 | 7 | 0 | 0 |
| 1 | 0 | 1 | 0 | 2 | 0 | 0 |
| 1 | 0 | 0 | 0 | 0 | 0 | 0 |
| 0 | 0 | 1 | 2 | 1 | 0 | 0 |
| 1 | 0 | 1 | 2 | 3 | 0 | 0 |
| 0 | 0 | 1 | 3 | 1 | 0 | 0 |
| 0 | 0 | 2 | 1 | 1 | 0 | 0 |
| 0 | 0 | 1 | 0 | 0 | 0 | 1 |
| 1 | 0 | 0 | 0 | 0 | 0 | 0 |
| 2 | 0 | 2 | 1 | 1 | 0 | 0 |
| 4 | 0 | 0 | 2 | 2 | 0 | 0 |
| 1 | 0 | 0 | 0 | 0 | 0 | 0 |
| 0 | 0 | 0 | 0 | 0 | 0 | 0 |
| 0 | 0 | 1 | 2 | 0 | 0 | 0 |
| 0 | 0 | 0 | 0 | 1 | 0 | 0 |
| 1 | 0 | 1 | 0 | 0 | 0 | 0 |
| 1 | 0 | 0 | 0 | 1 | 0 | 0 |
| 0 | 0 | 2 | 2 | 0 | 0 | 0 |
| 1 | 0 | 0 | 0 | 0 | 0 | 0 |
| 4 | 0 | 3 | 1 | 0 | 0 | 0 |
| 3 | 0 | 1 | 4 | 0 | 0 | 0 |
| 0 | 0 | 3 | 2 | 2 | 0 | 0 |
| 1 | 0 | 1 | 4 | 1 | 0 | 0 |
| 2 | 0 | 0 | 3 | 2 | 0 | 0 |
| 1 | 0 | 0 | 1 | 0 | 0 | 0 |
| 4 | 0 | 3 | 2 | 1 | 0 | 0 |
| 2 | 0 | 1 | 0 | 0 | 0 | 0 |
| 0 | 0 | 0 | 1 | 1 | 0 | 0 |
| 0 | 0 | 0 | 0 | 0 | 0 | 0 |
| 0 | 0 | 1 | 0 | 1 | 0 | 0 |
| 2 | 0 | 0 | 0 | 1 | 0 | 0 |
| 0 | 0 | 1 | 2 | 1 | 0 | 0 |
| 0 | 0 | 1 | 1 | 1 | 0 | 0 |
| 1 | 0 | 0 | 0 | 2 | 0 | 0 |
| 0 | 0 | 3 | 1 | 1 | 0 | 0 |
| 1 | 0 | 2 | 1 | 2 | 0 | 0 |
| 0 | 0 | 2 | 0 | 1 | 0 | 0 |
| 0 | 0 | 1 | 4 | 1 | 0 | 0 |
| 0 | 0 | 0 | 0 | 3 | 0 | 0 |
| 0 | 0 | 0 | 1 | 4 | 0 | 0 |
| 0 | 0 | 0 | 2 | 0 | 0 | 0 |
| 1 | 0 | 1 | 1 | 2 | 0 | 0 |
| 0 | 0 | 0 | 0 | 6 | 0 | 0 |
| 0 | 0 | 3 | 1 | 0 | 0 | 0 |
| 1 | 0 | 1 | 2 | 0 | 0 | 0 |
| 0 | 0 | 0 | 1 | 3 | 0 | 0 |
| 0 | 0 | 0 | 0 | 2 | 0 | 0 |
| 1 | 0 | 0 | 0 | 1 | 0 | 0 |

|         |        |         |         |         |       |       |
|---------|--------|---------|---------|---------|-------|-------|
| 0       | 0      | 0       | 2       | 0       | 0     | 0     |
| 0       | 0      | 1       | 0       | 0       | 0     | 0     |
| 1       | 0      | 0       | 1       | 1       | 0     | 0     |
| 0       | 0      | 0       | 0       | 3       | 0     | 0     |
| 0       | 0      | 2       | 0       | 2       | 0     | 0     |
| 0       | 0      | 1       | 2       | 1       | 0     | 0     |
| 0       | 0      | 0       | 0       | 0       | 0     | 0     |
| 1       | 0      | 0       | 0       | 0       | 0     | 0     |
| 3       | 0      | 0       | 0       | 3       | 0     | 0     |
| 0       | 0      | 1       | 0       | 0       | 0     | 0     |
| 0       | 0      | 2       | 3       | 0       | 0     | 0     |
| 0       | 0      | 1       | 1       | 3       | 0     | 0     |
| 0       | 5      | 0       | 0       | 0       | 28    | 14    |
| A_12    | A_18   | A_3     | A_5     | A_6     | A_8   | A_9   |
| CHR_P   | CHR_P  | CHR_P   | CHR_P   | CHR_P   | CHR_P | CHR_P |
| 1550131 | 329293 | 4990561 | 2150260 | 3017555 | 2193  | 62387 |
| 22      | 29     | 27      | 22      | 21      | 23    | 24    |
| 0.06    | 1.58   | 1.20    | 0.16    | -0.02   | 0.32  | 0.61  |



|         |        |         |         |        |         |        |
|---------|--------|---------|---------|--------|---------|--------|
| 0.85    | 0.30   | 0.51    | 0.48    | 0.05   | 0.43    | 0.20   |
| 6       | 17     | 11      | 12      | 25     | 13      | 20     |
| 1       | 1      | 1       | 1       | 1      | 1       | 1      |
| 71      | 72     | 73      | 74      | 75     | 76      | 77     |
| 6       | 7      | 8       | 9       | 10     | 11      | 12     |
| A_6     | B_31   | C_4     | C_45    | D_11   | D_35    | D_5    |
| CHR_P   | CHR_P  | CHR_P   | CHR_P   | CHR_P  | CHR_P   | CHR_P  |
| 1468719 | 409595 | 1862148 | 4820581 | 198165 | 2718285 | 905697 |
| A_6     | B_31   | C_4     | C_45    | D_11   | D_35    | D_5    |
| 807275  | 57543  | 839593  | 1485363 | 66104  | 922039  | 250879 |
| 36332   | 782    | 62135   | 149104  | 2808   | 110593  | 187485 |
| 51941   | 116387 | 66190   | 519025  | 27131  | 288601  | 83289  |
| 91415   | 8068   | 137605  | 290995  | 2601   | 177243  | 39675  |
| 63497   | 12377  | 74324   | 311607  | 21738  | 157984  | 41080  |
| 17647   | 76530  | 110612  | 290912  | 76     | 148973  | 33455  |
| 34873   | 17767  | 60894   | 195271  | 1079   | 87662   | 37482  |
| 4352    | 3301   | 13437   | 142980  | 751    | 19838   | 9389   |
| 20373   | 1786   | 45753   | 137089  | 680    | 116931  | 10484  |
| 52728   | 9961   | 80032   | 105854  | 790    | 50422   | 31476  |
| 36895   | 14513  | 52008   | 71950   | 4647   | 67416   | 9519   |
| 21912   | 4756   | 23945   | 89230   | 1976   | 38096   | 8959   |
| 21818   | 10040  | 31706   | 64809   | 394    | 62420   | 7016   |
| 21332   | 1245   | 29523   | 91349   | 10147  | 28410   | 5598   |
| 6502    | 16498  | 20456   | 76934   | 42     | 49422   | 5698   |
| 12372   | 391    | 12155   | 36167   | 4096   | 34739   | 976    |
| 5382    | 2884   | 9723    | 47570   | 42     | 23519   | 5442   |
| 10384   | 1475   | 9271    | 47481   | 1230   | 22958   | 8395   |
| 5314    | 2600   | 11194   | 44142   | 118    | 18192   | 5563   |

|       |      |      |       |      |       |       |
|-------|------|------|-------|------|-------|-------|
| 9014  | 4618 | 6833 | 23589 | 858  | 12258 | 13575 |
| 4666  | 1685 | 9605 | 29496 | 2819 | 13803 | 6319  |
| 10705 | 834  | 9464 | 27925 | 164  | 12294 | 3499  |
| 6023  | 3021 | 4524 | 7791  | 39   | 10145 | 5295  |
| 3612  | 673  | 2563 | 23854 | 103  | 5539  | 5107  |
| 2202  | 2687 | 4476 | 44370 | 52   | 6827  | 8514  |
| 8134  | 1409 | 6167 | 16802 | 977  | 8451  | 3533  |
| 5415  | 197  | 5688 | 14709 | 9351 | 15189 | 1765  |
| 1953  | 4048 | 8002 | 20128 | 78   | 5939  | 5604  |
| 2833  | 284  | 5632 | 14766 | 278  | 8474  | 2631  |
| 5088  | 948  | 4409 | 6685  | 418  | 8789  | 2520  |
| 3250  | 2002 | 5124 | 25164 | 59   | 9530  | 3332  |
| 4663  | 433  | 7383 | 20268 | 385  | 8809  | 1435  |
| 2217  | 1549 | 3256 | 13895 | 86   | 6943  | 1007  |
| 1123  | 1700 | 1982 | 10549 | 18   | 6747  | 794   |
| 1949  | 239  | 5156 | 13744 | 257  | 7733  | 2413  |
| 4119  | 458  | 6282 | 13928 | 136  | 4661  | 2640  |
| 2187  | 2186 | 3772 | 15343 | 153  | 5402  | 6796  |
| 2191  | 1609 | 4793 | 19198 | 132  | 3571  | 4428  |
| 3401  | 167  | 2424 | 7797  | 1014 | 2545  | 4355  |
| 3374  | 825  | 2996 | 7643  | 4999 | 4253  | 645   |
| 3705  | 78   | 1428 | 11190 | 4456 | 2903  | 1173  |
| 1895  | 471  | 2099 | 11262 | 934  | 7323  | 1439  |
| 2949  | 602  | 2529 | 6823  | 1404 | 3054  | 868   |
| 491   | 1521 | 2832 | 9459  | 19   | 3067  | 1973  |
| 1914  | 595  | 1373 | 9487  | 1047 | 3258  | 1950  |
| 2764  | 424  | 1740 | 6714  | 471  | 3847  | 975   |
| 1540  | 186  | 1506 | 3436  | 169  | 3733  | 841   |
| 3433  | 549  | 2982 | 6373  | 1287 | 4733  | 865   |
| 791   | 212  | 959  | 1740  | 4    | 1212  | 28    |
| 628   | 2941 | 539  | 9094  | 31   | 2585  | 920   |
| 1881  | 14   | 728  | 3394  | 682  | 4094  | 865   |
| 478   | 172  | 1546 | 8012  | 189  | 2108  | 1343  |
| 966   | 138  | 1472 | 4898  | 2738 | 2224  | 1314  |
| 1910  | 1599 | 1514 | 4602  | 26   | 2533  | 2209  |
| 747   | 88   | 651  | 1278  | 93   | 1729  | 394   |
| 213   | 382  | 207  | 1338  | 10   | 837   | 81    |
| 670   | 428  | 1397 | 4655  | 125  | 1954  | 667   |
| 733   | 157  | 936  | 5182  | 10   | 2506  | 630   |
| 1214  | 202  | 1298 | 5766  | 66   | 3213  | 1208  |
| 1512  | 123  | 765  | 3285  | 174  | 2007  | 507   |
| 1255  | 120  | 918  | 4397  | 392  | 1512  | 344   |
| 550   | 175  | 579  | 4681  | 269  | 2088  | 1090  |
| 129   | 106  | 433  | 1690  | 9    | 767   | 178   |
| 41    | 79   | 66   | 195   | 6    | 144   | 36    |
| 2392  | 438  | 1622 | 4366  | 139  | 2114  | 216   |
| 622   | 236  | 979  | 3131  | 2    | 1689  | 458   |
| 232   | 461  | 698  | 4507  | 12   | 1244  | 331   |
| 372   | 103  | 311  | 2696  | 1    | 1333  | 271   |
| 366   | 131  | 598  | 7405  | 81   | 781   | 465   |
| 411   | 29   | 1410 | 1546  | 20   | 395   | 1464  |
| 538   | 442  | 640  | 2261  | 346  | 1351  | 322   |
| 1361  | 140  | 1117 | 1937  | 218  | 1738  | 245   |
| 257   | 73   | 558  | 2504  | 4    | 1489  | 291   |
| 718   | 314  | 1035 | 2168  | 35   | 1279  | 349   |
| 314   | 175  | 376  | 1387  | 27   | 1345  | 357   |
| 816   | 146  | 433  | 3090  | 170  | 2575  | 217   |
| 409   | 38   | 665  | 1039  | 206  | 1059  | 340   |
| 256   | 9    | 366  | 703   | 87   | 482   | 428   |



|     |     |      |      |      |      |     |
|-----|-----|------|------|------|------|-----|
| 566 | 56  | 559  | 2219 | 331  | 1650 | 185 |
| 158 | 30  | 634  | 2223 | 119  | 849  | 231 |
| 398 | 28  | 1130 | 1364 | 27   | 1025 | 146 |
| 526 | 20  | 383  | 1929 | 409  | 1023 | 133 |
| 675 | 36  | 695  | 1086 | 22   | 756  | 296 |
| 113 | 69  | 163  | 712  | 1    | 1101 | 87  |
| 177 | 50  | 251  | 656  | 18   | 464  | 305 |
| 384 | 2   | 260  | 1491 | 2711 | 571  | 138 |
| 416 | 160 | 450  | 947  | 1111 | 995  | 260 |
| 199 | 149 | 486  | 2576 | 7    | 980  | 121 |
| 312 | 319 | 474  | 1826 | 2    | 1036 | 142 |
| 560 | 36  | 356  | 1112 | 38   | 1129 | 190 |
| 337 | 217 | 370  | 1293 | 74   | 581  | 157 |
| 22  | 7   | 61   | 126  | 11   | 84   | 3   |
| 382 | 26  | 361  | 1762 | 96   | 710  | 97  |
| 192 | 58  | 236  | 982  | 7    | 959  | 86  |
| 72  | 245 | 249  | 1371 | 1    | 647  | 45  |
| 122 | 262 | 322  | 2157 | 1    | 996  | 165 |
| 265 | 25  | 197  | 628  | 139  | 612  | 227 |
| 352 | 160 | 312  | 944  | 212  | 510  | 189 |
| 296 | 81  | 185  | 818  | 165  | 368  | 332 |
| 31  | 66  | 176  | 1483 | 3    | 651  | 104 |
| 221 | 6   | 125  | 584  | 526  | 170  | 224 |
| 124 | 131 | 317  | 427  | 3    | 391  | 114 |
| 212 | 34  | 288  | 921  | 275  | 827  | 125 |
| 162 | 54  | 247  | 971  | 0    | 285  | 129 |
| 198 | 244 | 362  | 2134 | 0    | 396  | 165 |
| 126 | 17  | 173  | 973  | 3    | 430  | 109 |
| 170 | 48  | 135  | 921  | 694  | 331  | 117 |
| 91  | 61  | 165  | 676  | 9    | 235  | 206 |
| 124 | 68  | 187  | 919  | 1    | 501  | 39  |
| 106 | 26  | 179  | 1203 | 14   | 513  | 61  |
| 82  | 108 | 156  | 1025 | 6    | 450  | 256 |
| 209 | 24  | 80   | 588  | 111  | 440  | 123 |
| 186 | 32  | 85   | 978  | 413  | 192  | 183 |
| 102 | 24  | 139  | 459  | 0    | 286  | 133 |
| 94  | 20  | 137  | 753  | 20   | 598  | 144 |
| 237 | 9   | 170  | 525  | 35   | 436  | 66  |
| 96  | 38  | 83   | 424  | 4    | 508  | 102 |
| 98  | 105 | 142  | 472  | 3    | 425  | 48  |
| 98  | 105 | 142  | 472  | 3    | 425  | 48  |
| 87  | 14  | 184  | 1078 | 7    | 177  | 136 |
| 161 | 30  | 205  | 911  | 345  | 247  | 28  |
| 266 | 43  | 248  | 1072 | 4    | 336  | 87  |
| 99  | 22  | 63   | 492  | 0    | 491  | 66  |
| 109 | 59  | 87   | 391  | 8    | 241  | 219 |
| 14  | 5   | 19   | 131  | 4    | 94   | 8   |
| 165 | 23  | 173  | 453  | 28   | 275  | 32  |
| 50  | 13  | 70   | 132  | 663  | 112  | 64  |
| 153 | 36  | 121  | 518  | 30   | 157  | 53  |
| 116 | 2   | 59   | 244  | 294  | 79   | 96  |
| 113 | 3   | 63   | 307  | 45   | 220  | 69  |
| 26  | 2   | 98   | 106  | 63   | 36   | 25  |
| 151 | 115 | 106  | 657  | 27   | 328  | 79  |
| 53  | 5   | 72   | 222  | 13   | 160  | 64  |
| 84  | 16  | 81   | 230  | 128  | 129  | 25  |
| 51  | 11  | 56   | 185  | 126  | 198  | 16  |
| 83  | 2   | 89   | 335  | 30   | 271  | 96  |
| 64  | 4   | 209  | 327  | 10   | 250  | 29  |

|     |    |     |     |     |     |    |
|-----|----|-----|-----|-----|-----|----|
| 152 | 6  | 83  | 331 | 45  | 355 | 35 |
| 78  | 19 | 86  | 246 | 0   | 174 | 26 |
| 74  | 14 | 93  | 759 | 107 | 120 | 36 |
| 124 | 5  | 72  | 219 | 20  | 75  | 30 |
| 43  | 19 | 128 | 359 | 19  | 156 | 30 |
| 132 | 11 | 108 | 661 | 83  | 257 | 22 |
| 86  | 22 | 41  | 198 | 1   | 127 | 37 |
| 4   | 11 | 33  | 200 | 4   | 62  | 2  |
| 148 | 40 | 193 | 453 | 51  | 145 | 22 |
| 93  | 7  | 45  | 250 | 0   | 169 | 32 |
| 50  | 37 | 51  | 286 | 0   | 130 | 44 |
| 109 | 66 | 215 | 314 | 3   | 195 | 25 |
| 104 | 2  | 50  | 168 | 109 | 87  | 35 |
| 26  | 25 | 70  | 227 | 2   | 159 | 65 |
| 31  | 18 | 81  | 269 | 3   | 152 | 29 |
| 68  | 6  | 32  | 427 | 0   | 519 | 31 |
| 80  | 1  | 39  | 226 | 13  | 71  | 19 |
| 38  | 14 | 17  | 782 | 2   | 215 | 6  |
| 54  | 21 | 99  | 180 | 74  | 81  | 19 |
| 33  | 1  | 33  | 86  | 9   | 69  | 44 |
| 27  | 7  | 33  | 226 | 50  | 84  | 19 |
| 66  | 23 | 54  | 297 | 90  | 84  | 31 |
| 102 | 3  | 89  | 85  | 103 | 182 | 16 |
| 12  | 3  | 8   | 50  | 1   | 34  | 11 |
| 43  | 8  | 33  | 241 | 95  | 74  | 42 |
| 34  | 10 | 71  | 269 | 83  | 94  | 23 |
| 43  | 16 | 32  | 421 | 1   | 134 | 39 |
| 18  | 4  | 27  | 182 | 0   | 121 | 40 |
| 112 | 17 | 97  | 210 | 65  | 195 | 12 |
| 45  | 3  | 45  | 176 | 2   | 51  | 35 |
| 29  | 5  | 33  | 280 | 265 | 27  | 33 |
| 5   | 37 | 5   | 101 | 0   | 56  | 8  |
| 109 | 16 | 217 | 254 | 11  | 176 | 12 |
| 13  | 32 | 34  | 234 | 12  | 25  | 28 |
| 49  | 3  | 111 | 153 | 3   | 160 | 21 |
| 50  | 3  | 62  | 150 | 2   | 124 | 71 |
| 22  | 7  | 61  | 271 | 2   | 134 | 61 |
| 35  | 7  | 25  | 277 | 1   | 80  | 26 |
| 63  | 5  | 45  | 76  | 186 | 138 | 19 |
| 63  | 5  | 31  | 178 | 12  | 208 | 16 |
| 16  | 38 | 44  | 219 | 2   | 116 | 36 |
| 19  | 4  | 55  | 227 | 47  | 44  | 22 |
| 44  | 19 | 33  | 236 | 19  | 181 | 19 |
| 31  | 2  | 97  | 131 | 16  | 123 | 28 |
| 15  | 8  | 45  | 186 | 0   | 100 | 19 |
| 54  | 0  | 15  | 158 | 27  | 117 | 9  |
| 12  | 12 | 61  | 225 | 0   | 98  | 24 |
| 36  | 4  | 25  | 91  | 21  | 78  | 27 |
| 45  | 5  | 56  | 172 | 107 | 91  | 7  |
| 13  | 7  | 41  | 172 | 0   | 98  | 17 |
| 88  | 22 | 25  | 228 | 2   | 204 | 11 |
| 23  | 13 | 16  | 168 | 23  | 108 | 3  |
| 17  | 4  | 33  | 169 | 5   | 55  | 18 |
| 62  | 2  | 20  | 48  | 179 | 2   | 1  |
| 1   | 17 | 29  | 359 | 0   | 90  | 16 |
| 20  | 1  | 21  | 177 | 6   | 78  | 47 |
| 48  | 12 | 24  | 100 | 4   | 113 | 21 |
| 58  | 5  | 62  | 99  | 14  | 65  | 31 |
| 23  | 4  | 16  | 29  | 13  | 44  | 13 |

|    |    |    |     |     |     |    |
|----|----|----|-----|-----|-----|----|
| 11 | 19 | 10 | 81  | 0   | 31  | 8  |
| 38 | 11 | 95 | 171 | 4   | 80  | 21 |
| 21 | 1  | 20 | 186 | 90  | 55  | 9  |
| 27 | 14 | 63 | 119 | 18  | 53  | 34 |
| 23 | 0  | 16 | 85  | 3   | 50  | 20 |
| 32 | 10 | 13 | 301 | 1   | 113 | 49 |
| 64 | 0  | 46 | 104 | 55  | 28  | 14 |
| 24 | 5  | 28 | 49  | 32  | 61  | 36 |
| 11 | 1  | 34 | 106 | 0   | 54  | 8  |
| 80 | 2  | 15 | 123 | 22  | 144 | 3  |
| 26 | 3  | 61 | 118 | 30  | 56  | 17 |
| 43 | 29 | 35 | 142 | 0   | 62  | 31 |
| 20 | 1  | 18 | 140 | 4   | 134 | 1  |
| 60 | 3  | 54 | 204 | 21  | 35  | 5  |
| 65 | 4  | 16 | 57  | 52  | 35  | 22 |
| 15 | 8  | 30 | 138 | 2   | 74  | 21 |
| 24 | 22 | 18 | 123 | 0   | 142 | 21 |
| 35 | 1  | 53 | 124 | 63  | 73  | 17 |
| 13 | 9  | 35 | 108 | 5   | 122 | 11 |
| 23 | 28 | 32 | 84  | 26  | 47  | 30 |
| 16 | 8  | 30 | 74  | 5   | 52  | 12 |
| 21 | 4  | 25 | 138 | 5   | 73  | 15 |
| 0  | 0  | 2  | 16  | 0   | 13  | 0  |
| 32 | 0  | 41 | 68  | 0   | 51  | 4  |
| 11 | 1  | 2  | 11  | 0   | 34  | 0  |
| 35 | 5  | 61 | 116 | 22  | 58  | 9  |
| 14 | 3  | 12 | 59  | 7   | 24  | 12 |
| 25 | 3  | 33 | 125 | 24  | 42  | 8  |
| 44 | 6  | 20 | 152 | 0   | 129 | 8  |
| 21 | 0  | 16 | 77  | 22  | 58  | 13 |
| 20 | 2  | 21 | 43  | 32  | 59  | 10 |
| 37 | 2  | 42 | 41  | 24  | 83  | 3  |
| 29 | 2  | 22 | 58  | 13  | 27  | 9  |
| 17 | 2  | 25 | 77  | 0   | 22  | 10 |
| 2  | 7  | 23 | 71  | 0   | 43  | 15 |
| 26 | 4  | 27 | 34  | 15  | 44  | 18 |
| 2  | 9  | 8  | 44  | 0   | 21  | 2  |
| 24 | 2  | 16 | 65  | 40  | 39  | 4  |
| 20 | 3  | 22 | 69  | 0   | 40  | 2  |
| 30 | 5  | 22 | 49  | 97  | 29  | 7  |
| 8  | 2  | 4  | 35  | 102 | 24  | 11 |
| 10 | 1  | 4  | 54  | 0   | 12  | 13 |
| 8  | 27 | 9  | 117 | 1   | 43  | 14 |
| 25 | 4  | 22 | 89  | 3   | 24  | 1  |
| 35 | 2  | 21 | 140 | 1   | 82  | 8  |
| 16 | 4  | 23 | 36  | 5   | 31  | 1  |
| 5  | 2  | 20 | 71  | 0   | 24  | 8  |
| 10 | 4  | 2  | 45  | 0   | 22  | 15 |
| 10 | 4  | 2  | 45  | 0   | 22  | 15 |
| 22 | 0  | 6  | 74  | 3   | 69  | 5  |
| 10 | 0  | 18 | 70  | 26  | 31  | 8  |
| 5  | 2  | 10 | 38  | 11  | 20  | 10 |
| 18 | 6  | 14 | 94  | 2   | 115 | 4  |
| 9  | 5  | 16 | 98  | 0   | 25  | 9  |
| 11 | 3  | 11 | 78  | 3   | 36  | 6  |
| 15 | 6  | 14 | 36  | 3   | 23  | 4  |
| 13 | 0  | 75 | 106 | 1   | 56  | 0  |
| 21 | 0  | 11 | 32  | 78  | 12  | 2  |
| 5  | 10 | 11 | 102 | 0   | 23  | 11 |

|    |    |    |     |    |    |    |
|----|----|----|-----|----|----|----|
| 13 | 0  | 21 | 13  | 5  | 10 | 8  |
| 11 | 5  | 5  | 63  | 2  | 39 | 0  |
| 11 | 0  | 19 | 56  | 0  | 17 | 7  |
| 1  | 2  | 4  | 11  | 2  | 9  | 0  |
| 20 | 2  | 23 | 113 | 5  | 15 | 8  |
| 8  | 6  | 22 | 36  | 0  | 24 | 12 |
| 6  | 1  | 12 | 32  | 11 | 36 | 8  |
| 16 | 1  | 35 | 48  | 18 | 41 | 3  |
| 8  | 5  | 20 | 34  | 0  | 23 | 11 |
| 18 | 0  | 14 | 32  | 4  | 49 | 8  |
| 7  | 0  | 8  | 31  | 23 | 41 | 2  |
| 15 | 5  | 16 | 68  | 1  | 52 | 4  |
| 15 | 1  | 14 | 77  | 14 | 32 | 4  |
| 0  | 0  | 0  | 0   | 0  | 2  | 1  |
| 8  | 1  | 2  | 25  | 73 | 23 | 5  |
| 20 | 2  | 24 | 48  | 16 | 22 | 5  |
| 18 | 0  | 8  | 27  | 32 | 29 | 5  |
| 30 | 1  | 11 | 112 | 1  | 49 | 0  |
| 10 | 2  | 13 | 24  | 0  | 15 | 7  |
| 1  | 0  | 1  | 32  | 0  | 11 | 0  |
| 13 | 1  | 3  | 40  | 3  | 11 | 10 |
| 16 | 0  | 14 | 91  | 0  | 31 | 5  |
| 4  | 1  | 14 | 46  | 0  | 0  | 0  |
| 14 | 0  | 19 | 30  | 12 | 22 | 1  |
| 5  | 1  | 30 | 83  | 2  | 36 | 1  |
| 7  | 1  | 6  | 24  | 20 | 7  | 7  |
| 7  | 0  | 3  | 55  | 5  | 27 | 2  |
| 13 | 0  | 22 | 52  | 4  | 29 | 5  |
| 30 | 8  | 11 | 46  | 1  | 63 | 3  |
| 10 | 0  | 13 | 29  | 20 | 21 | 2  |
| 13 | 0  | 6  | 31  | 14 | 24 | 3  |
| 11 | 1  | 19 | 22  | 4  | 20 | 8  |
| 15 | 0  | 11 | 81  | 0  | 28 | 4  |
| 17 | 1  | 10 | 145 | 1  | 51 | 0  |
| 0  | 2  | 19 | 76  | 0  | 2  | 4  |
| 5  | 13 | 4  | 24  | 0  | 28 | 2  |
| 0  | 2  | 5  | 10  | 1  | 20 | 25 |
| 14 | 0  | 4  | 20  | 17 | 14 | 1  |
| 5  | 2  | 8  | 33  | 0  | 20 | 8  |
| 18 | 5  | 1  | 71  | 3  | 69 | 0  |
| 14 | 3  | 10 | 33  | 9  | 41 | 4  |
| 1  | 6  | 12 | 75  | 0  | 20 | 3  |
| 20 | 2  | 12 | 39  | 2  | 12 | 7  |
| 6  | 1  | 9  | 28  | 10 | 25 | 2  |
| 13 | 3  | 5  | 31  | 46 | 6  | 3  |
| 7  | 18 | 5  | 242 | 0  | 76 | 2  |
| 10 | 0  | 2  | 41  | 2  | 49 | 1  |
| 9  | 0  | 6  | 28  | 1  | 14 | 5  |
| 11 | 0  | 8  | 22  | 33 | 22 | 2  |
| 11 | 3  | 13 | 40  | 18 | 52 | 3  |
| 11 | 6  | 11 | 48  | 1  | 19 | 7  |
| 5  | 2  | 12 | 48  | 5  | 9  | 2  |
| 20 | 4  | 7  | 39  | 17 | 24 | 1  |
| 5  | 0  | 5  | 28  | 33 | 17 | 5  |
| 8  | 0  | 5  | 35  | 26 | 9  | 2  |
| 7  | 9  | 15 | 37  | 0  | 27 | 7  |
| 7  | 0  | 9  | 27  | 5  | 13 | 5  |
| 1  | 3  | 1  | 18  | 0  | 15 | 2  |
| 2  | 1  | 6  | 13  | 0  | 14 | 6  |

|    |    |    |    |    |    |   |
|----|----|----|----|----|----|---|
| 10 | 13 | 18 | 37 | 1  | 22 | 5 |
| 3  | 6  | 19 | 31 | 0  | 15 | 5 |
| 16 | 0  | 10 | 53 | 17 | 13 | 4 |
| 6  | 2  | 7  | 25 | 0  | 9  | 5 |
| 8  | 0  | 5  | 48 | 15 | 12 | 7 |
| 6  | 14 | 4  | 21 | 1  | 19 | 2 |
| 9  | 0  | 8  | 32 | 6  | 18 | 1 |
| 6  | 1  | 8  | 16 | 0  | 12 | 2 |
| 7  | 4  | 12 | 17 | 2  | 18 | 5 |
| 12 | 0  | 2  | 21 | 2  | 23 | 0 |
| 12 | 0  | 6  | 16 | 3  | 17 | 3 |
| 12 | 0  | 6  | 37 | 1  | 19 | 2 |
| 0  | 2  | 7  | 49 | 13 | 28 | 0 |
| 4  | 0  | 6  | 15 | 5  | 9  | 1 |
| 10 | 1  | 9  | 34 | 0  | 8  | 3 |
| 4  | 0  | 8  | 42 | 19 | 5  | 2 |
| 9  | 0  | 2  | 32 | 1  | 24 | 9 |
| 10 | 1  | 7  | 26 | 9  | 5  | 2 |
| 2  | 1  | 0  | 4  | 1  | 5  | 2 |
| 7  | 5  | 7  | 9  | 10 | 14 | 2 |
| 2  | 3  | 2  | 15 | 0  | 15 | 2 |
| 3  | 1  | 11 | 17 | 2  | 15 | 3 |
| 1  | 1  | 10 | 27 | 0  | 9  | 1 |
| 7  | 3  | 4  | 20 | 2  | 13 | 1 |
| 0  | 0  | 5  | 4  | 0  | 2  | 1 |
| 17 | 0  | 8  | 17 | 2  | 19 | 3 |
| 6  | 4  | 13 | 14 | 0  | 11 | 1 |
| 5  | 4  | 5  | 31 | 2  | 14 | 2 |
| 3  | 0  | 15 | 14 | 3  | 5  | 3 |
| 3  | 1  | 8  | 33 | 1  | 17 | 3 |
| 6  | 1  | 7  | 10 | 6  | 2  | 5 |
| 5  | 1  | 1  | 15 | 1  | 11 | 3 |
| 5  | 1  | 4  | 37 | 7  | 14 | 2 |
| 3  | 2  | 4  | 10 | 0  | 24 | 3 |
| 6  | 0  | 12 | 23 | 0  | 8  | 2 |
| 6  | 2  | 6  | 20 | 1  | 15 | 4 |
| 5  | 2  | 7  | 28 | 14 | 5  | 4 |
| 2  | 0  | 10 | 38 | 0  | 5  | 0 |
| 1  | 1  | 7  | 23 | 0  | 11 | 3 |
| 0  | 1  | 0  | 7  | 0  | 6  | 1 |
| 2  | 2  | 5  | 20 | 2  | 9  | 0 |
| 7  | 0  | 4  | 36 | 3  | 10 | 2 |
| 4  | 0  | 3  | 40 | 0  | 19 | 2 |
| 5  | 0  | 0  | 12 | 5  | 10 | 0 |
| 3  | 1  | 0  | 19 | 0  | 4  | 1 |
| 6  | 0  | 5  | 12 | 4  | 5  | 2 |
| 3  | 0  | 2  | 12 | 0  | 10 | 9 |
| 3  | 0  | 2  | 17 | 3  | 4  | 8 |
| 1  | 1  | 3  | 8  | 1  | 10 | 1 |
| 2  | 2  | 6  | 21 | 1  | 13 | 0 |
| 5  | 0  | 5  | 9  | 11 | 8  | 7 |
| 6  | 1  | 6  | 12 | 4  | 9  | 2 |
| 0  | 3  | 4  | 58 | 0  | 9  | 0 |
| 1  | 0  | 3  | 17 | 0  | 5  | 1 |
| 5  | 0  | 2  | 15 | 5  | 10 | 4 |
| 2  | 0  | 5  | 9  | 0  | 6  | 4 |
| 3  | 1  | 6  | 16 | 1  | 2  | 1 |
| 4  | 1  | 2  | 21 | 0  | 4  | 5 |
| 2  | 0  | 1  | 12 | 1  | 6  | 0 |

|   |   |    |    |    |    |   |
|---|---|----|----|----|----|---|
| 4 | 1 | 4  | 10 | 2  | 21 | 1 |
| 1 | 5 | 1  | 14 | 0  | 6  | 2 |
| 7 | 1 | 2  | 15 | 0  | 7  | 0 |
| 1 | 0 | 1  | 14 | 1  | 8  | 9 |
| 7 | 0 | 2  | 5  | 10 | 10 | 0 |
| 6 | 0 | 2  | 12 | 4  | 9  | 0 |
| 6 | 1 | 2  | 6  | 0  | 8  | 2 |
| 1 | 1 | 1  | 8  | 2  | 4  | 2 |
| 5 | 0 | 0  | 11 | 2  | 23 | 3 |
| 5 | 1 | 3  | 11 | 0  | 14 | 2 |
| 4 | 0 | 8  | 9  | 1  | 12 | 0 |
| 2 | 1 | 2  | 10 | 7  | 2  | 3 |
| 0 | 0 | 3  | 28 | 1  | 3  | 6 |
| 3 | 0 | 4  | 13 | 3  | 8  | 0 |
| 2 | 1 | 1  | 16 | 7  | 8  | 0 |
| 1 | 1 | 5  | 31 | 0  | 5  | 1 |
| 3 | 0 | 0  | 1  | 0  | 2  | 0 |
| 8 | 1 | 2  | 11 | 8  | 8  | 0 |
| 2 | 0 | 1  | 23 | 1  | 17 | 0 |
| 1 | 5 | 0  | 10 | 0  | 6  | 1 |
| 7 | 0 | 0  | 8  | 15 | 1  | 3 |
| 3 | 2 | 4  | 13 | 0  | 9  | 2 |
| 0 | 2 | 4  | 7  | 0  | 3  | 2 |
| 0 | 0 | 3  | 7  | 3  | 7  | 4 |
| 5 | 0 | 4  | 10 | 2  | 6  | 3 |
| 0 | 0 | 0  | 8  | 4  | 5  | 1 |
| 4 | 1 | 12 | 17 | 0  | 12 | 1 |
| 1 | 0 | 5  | 10 | 1  | 8  | 0 |
| 0 | 2 | 3  | 3  | 0  | 8  | 4 |
| 1 | 3 | 2  | 11 | 0  | 5  | 0 |
| 4 | 1 | 3  | 3  | 5  | 6  | 1 |
| 3 | 0 | 0  | 5  | 5  | 6  | 2 |
| 1 | 0 | 3  | 16 | 3  | 9  | 1 |
| 1 | 1 | 0  | 11 | 0  | 8  | 0 |
| 0 | 1 | 2  | 4  | 1  | 6  | 0 |
| 5 | 1 | 4  | 8  | 0  | 4  | 1 |
| 4 | 5 | 1  | 4  | 0  | 11 | 1 |
| 1 | 0 | 0  | 3  | 0  | 1  | 0 |
| 2 | 0 | 0  | 0  | 0  | 0  | 0 |
| 3 | 1 | 1  | 12 | 0  | 5  | 1 |
| 3 | 0 | 4  | 9  | 23 | 3  | 2 |
| 3 | 0 | 3  | 8  | 5  | 2  | 0 |
| 1 | 2 | 5  | 7  | 7  | 3  | 1 |
| 1 | 0 | 2  | 4  | 0  | 7  | 0 |
| 0 | 1 | 0  | 2  | 0  | 0  | 0 |
| 0 | 0 | 2  | 26 | 0  | 8  | 2 |
| 0 | 0 | 3  | 11 | 1  | 11 | 1 |
| 0 | 0 | 1  | 13 | 0  | 1  | 1 |
| 6 | 0 | 1  | 5  | 1  | 9  | 1 |
| 2 | 0 | 3  | 11 | 2  | 7  | 0 |
| 6 | 0 | 4  | 7  | 4  | 8  | 1 |
| 0 | 2 | 0  | 6  | 0  | 2  | 0 |
| 1 | 0 | 1  | 8  | 0  | 4  | 0 |
| 2 | 2 | 1  | 20 | 0  | 6  | 0 |
| 1 | 0 | 3  | 8  | 1  | 5  | 1 |
| 2 | 0 | 0  | 11 | 0  | 3  | 2 |
| 0 | 2 | 0  | 4  | 0  | 2  | 0 |
| 4 | 1 | 0  | 8  | 0  | 5  | 2 |
| 2 | 0 | 4  | 4  | 1  | 5  | 3 |

|   |   |   |    |   |    |   |
|---|---|---|----|---|----|---|
| 4 | 0 | 1 | 6  | 2 | 9  | 0 |
| 5 | 1 | 5 | 8  | 0 | 3  | 1 |
| 0 | 0 | 1 | 5  | 1 | 3  | 1 |
| 6 | 0 | 2 | 6  | 5 | 3  | 0 |
| 4 | 0 | 6 | 6  | 2 | 9  | 0 |
| 3 | 0 | 0 | 12 | 0 | 2  | 2 |
| 7 | 1 | 0 | 19 | 0 | 19 | 2 |
| 1 | 0 | 0 | 3  | 0 | 7  | 0 |
| 4 | 2 | 2 | 7  | 0 | 6  | 1 |
| 0 | 0 | 2 | 4  | 0 | 7  | 3 |
| 0 | 0 | 3 | 4  | 0 | 7  | 1 |
| 5 | 0 | 2 | 9  | 1 | 5  | 0 |
| 2 | 0 | 2 | 10 | 0 | 2  | 0 |
| 2 | 0 | 7 | 2  | 0 | 1  | 2 |
| 0 | 0 | 1 | 7  | 5 | 2  | 3 |
| 4 | 0 | 2 | 3  | 2 | 0  | 0 |
| 2 | 0 | 2 | 10 | 2 | 5  | 0 |
| 1 | 0 | 1 | 8  | 0 | 4  | 3 |
| 0 | 0 | 8 | 6  | 0 | 6  | 0 |
| 3 | 0 | 0 | 18 | 5 | 2  | 0 |
| 3 | 0 | 3 | 9  | 0 | 3  | 1 |
| 1 | 0 | 0 | 5  | 0 | 3  | 2 |
| 0 | 0 | 2 | 6  | 0 | 0  | 0 |
| 1 | 0 | 2 | 6  | 2 | 4  | 2 |
| 3 | 0 | 1 | 4  | 3 | 7  | 1 |
| 2 | 0 | 0 | 4  | 2 | 1  | 0 |
| 1 | 1 | 0 | 9  | 0 | 1  | 0 |
| 1 | 0 | 2 | 8  | 0 | 2  | 0 |
| 2 | 0 | 1 | 2  | 0 | 4  | 1 |
| 3 | 0 | 2 | 8  | 2 | 1  | 0 |
| 0 | 0 | 0 | 3  | 0 | 2  | 0 |
| 1 | 0 | 3 | 10 | 0 | 6  | 0 |
| 2 | 1 | 1 | 4  | 3 | 3  | 0 |
| 0 | 0 | 0 | 3  | 0 | 0  | 0 |
| 1 | 0 | 1 | 3  | 0 | 3  | 1 |
| 0 | 0 | 1 | 19 | 0 | 5  | 1 |
| 7 | 0 | 6 | 9  | 1 | 14 | 0 |
| 2 | 1 | 1 | 15 | 1 | 1  | 1 |
| 0 | 1 | 1 | 5  | 0 | 6  | 0 |
| 1 | 0 | 2 | 0  | 8 | 3  | 0 |
| 3 | 0 | 2 | 7  | 0 | 7  | 0 |
| 1 | 0 | 4 | 5  | 0 | 2  | 3 |
| 1 | 0 | 0 | 2  | 0 | 1  | 0 |
| 0 | 0 | 0 | 2  | 0 | 2  | 0 |
| 0 | 0 | 3 | 1  | 0 | 2  | 0 |
| 1 | 0 | 4 | 7  | 1 | 0  | 2 |
| 2 | 0 | 0 | 10 | 0 | 2  | 0 |
| 0 | 1 | 1 | 3  | 0 | 2  | 1 |
| 0 | 3 | 2 | 4  | 0 | 2  | 1 |
| 0 | 0 | 1 | 7  | 3 | 4  | 1 |
| 1 | 1 | 1 | 2  | 2 | 3  | 1 |
| 0 | 0 | 1 | 12 | 0 | 6  | 1 |
| 1 | 2 | 0 | 2  | 3 | 3  | 1 |
| 0 | 0 | 1 | 2  | 3 | 3  | 1 |
| 0 | 0 | 0 | 1  | 0 | 0  | 0 |
| 0 | 0 | 3 | 2  | 0 | 0  | 1 |
| 0 | 0 | 1 | 15 | 0 | 7  | 2 |
| 2 | 0 | 1 | 4  | 1 | 0  | 0 |
| 1 | 0 | 4 | 8  | 0 | 3  | 0 |

|   |   |   |    |   |   |   |
|---|---|---|----|---|---|---|
| 2 | 0 | 0 | 1  | 2 | 2 | 0 |
| 0 | 0 | 1 | 10 | 1 | 2 | 1 |
| 1 | 0 | 1 | 7  | 1 | 0 | 0 |
| 0 | 0 | 2 | 3  | 6 | 2 | 0 |
| 1 | 1 | 0 | 7  | 0 | 3 | 1 |
| 0 | 0 | 3 | 4  | 1 | 0 | 1 |
| 1 | 0 | 0 | 4  | 6 | 1 | 0 |
| 1 | 3 | 2 | 7  | 0 | 4 | 1 |
| 1 | 0 | 0 | 6  | 3 | 0 | 0 |
| 1 | 0 | 1 | 2  | 0 | 3 | 0 |
| 2 | 0 | 1 | 1  | 0 | 2 | 0 |
| 0 | 0 | 1 | 2  | 0 | 3 | 1 |
| 1 | 0 | 4 | 5  | 0 | 2 | 0 |
| 2 | 1 | 0 | 1  | 0 | 1 | 0 |
| 1 | 0 | 4 | 6  | 0 | 3 | 2 |
| 1 | 0 | 0 | 5  | 1 | 5 | 1 |
| 3 | 0 | 0 | 6  | 0 | 3 | 1 |
| 4 | 0 | 1 | 3  | 1 | 3 | 0 |
| 0 | 0 | 0 | 15 | 0 | 2 | 1 |
| 2 | 0 | 0 | 12 | 0 | 1 | 0 |
| 6 | 1 | 0 | 0  | 0 | 1 | 0 |
| 0 | 3 | 3 | 7  | 1 | 3 | 0 |
| 0 | 3 | 3 | 7  | 0 | 5 | 2 |
| 3 | 0 | 0 | 0  | 0 | 2 | 0 |
| 2 | 0 | 1 | 1  | 1 | 1 | 0 |
| 1 | 0 | 2 | 2  | 0 | 1 | 0 |
| 0 | 1 | 1 | 5  | 0 | 1 | 0 |
| 0 | 1 | 0 | 4  | 2 | 2 | 0 |
| 1 | 0 | 0 | 1  | 0 | 2 | 0 |
| 3 | 0 | 0 | 1  | 1 | 5 | 1 |
| 2 | 0 | 0 | 0  | 0 | 3 | 0 |
| 1 | 0 | 0 | 6  | 0 | 3 | 0 |
| 0 | 1 | 0 | 2  | 4 | 0 | 1 |
| 0 | 0 | 1 | 1  | 8 | 2 | 0 |
| 3 | 0 | 0 | 1  | 0 | 2 | 0 |
| 0 | 0 | 0 | 0  | 0 | 9 | 0 |
| 0 | 0 | 1 | 2  | 0 | 1 | 0 |
| 3 | 0 | 5 | 2  | 1 | 3 | 0 |

|         |        |         |         |        |         |        |
|---------|--------|---------|---------|--------|---------|--------|
| 0.85    | 0.30   | 0.51    | 0.48    | 0.05   | 0.43    | 0.20   |
| 6       | 17     | 11      | 12      | 25     | 13      | 20     |
| 1       | 1      | 1       | 1       | 1      | 1       | 1      |
| 71      | 72     | 73      | 74      | 75     | 76      | 77     |
| 6       | 7      | 8       | 9       | 10     | 11      | 12     |
| A_6     | B_31   | C_4     | C_45    | D_11   | D_35    | D_5    |
| CHR_P   | CHR_P  | CHR_P   | CHR_P   | CHR_P  | CHR_P   | CHR_P  |
| 1468719 | 409595 | 1862148 | 4820581 | 198165 | 2718285 | 905697 |
| CHR_P   | CHR_P  | CHR_P   | CHR_P   | CHR_P  | CHR_P   | CHR_P  |
| 807275  | 57543  | 839593  | 1485363 | 66104  | 922039  | 250879 |
| 36332   | 782    | 62135   | 149104  | 2808   | 110593  | 187485 |
| 51941   | 116387 | 66190   | 519025  | 27131  | 288601  | 83289  |
| 91415   | 8068   | 137605  | 290995  | 2601   | 177243  | 39675  |
| 63497   | 12377  | 74324   | 311607  | 21738  | 157984  | 41080  |



|       |       |        |        |       |        |       |
|-------|-------|--------|--------|-------|--------|-------|
| 17647 | 76530 | 110612 | 290912 | 76    | 148973 | 33455 |
| 34873 | 17767 | 60894  | 195271 | 1079  | 87662  | 37482 |
| 4352  | 3301  | 13437  | 142980 | 751   | 19838  | 9389  |
| 20373 | 1786  | 45753  | 137089 | 680   | 116931 | 10484 |
| 52728 | 9961  | 80032  | 105854 | 790   | 50422  | 31476 |
| 36895 | 14513 | 52008  | 71950  | 4647  | 67416  | 9519  |
| 21912 | 4756  | 23945  | 89230  | 1976  | 38096  | 8959  |
| 21818 | 10040 | 31706  | 64809  | 394   | 62420  | 7016  |
| 21332 | 1245  | 29523  | 91349  | 10147 | 28410  | 5598  |
| 6502  | 16498 | 20456  | 76934  | 42    | 49422  | 5698  |
| 12372 | 391   | 12155  | 36167  | 4096  | 34739  | 976   |
| 5382  | 2884  | 9723   | 47570  | 42    | 23519  | 5442  |
| 10384 | 1475  | 9271   | 47481  | 1230  | 22958  | 8395  |
| 5314  | 2600  | 11194  | 44142  | 118   | 18192  | 5563  |
| 9014  | 4618  | 6833   | 23589  | 858   | 12258  | 13575 |
| 4666  | 1685  | 9605   | 29496  | 2819  | 13803  | 6319  |
| 10705 | 834   | 9464   | 27925  | 164   | 12294  | 3499  |
| 6023  | 3021  | 4524   | 7791   | 39    | 10145  | 5295  |
| 3612  | 673   | 2563   | 23854  | 103   | 5539   | 5107  |
| 2202  | 2687  | 4476   | 44370  | 52    | 6827   | 8514  |
| 8134  | 1409  | 6167   | 16802  | 977   | 8451   | 3533  |
| 5415  | 197   | 5688   | 14709  | 9351  | 15189  | 1765  |
| 1953  | 4048  | 8002   | 20128  | 78    | 5939   | 5604  |
| 2833  | 284   | 5632   | 14766  | 278   | 8474   | 2631  |
| 5088  | 948   | 4409   | 6685   | 418   | 8789   | 2520  |
| 3250  | 2002  | 5124   | 25164  | 59    | 9530   | 3332  |
| 4663  | 433   | 7383   | 20268  | 385   | 8809   | 1435  |
| 2217  | 1549  | 3256   | 13895  | 86    | 6943   | 1007  |
| 1123  | 1700  | 1982   | 10549  | 18    | 6747   | 794   |
| 1949  | 239   | 5156   | 13744  | 257   | 7733   | 2413  |
| 4119  | 458   | 6282   | 13928  | 136   | 4661   | 2640  |
| 2187  | 2186  | 3772   | 15343  | 153   | 5402   | 6796  |
| 2191  | 1609  | 4793   | 19198  | 132   | 3571   | 4428  |
| 3401  | 167   | 2424   | 7797   | 1014  | 2545   | 4355  |
| 3374  | 825   | 2996   | 7643   | 4999  | 4253   | 645   |
| 3705  | 78    | 1428   | 11190  | 4456  | 2903   | 1173  |
| 1895  | 471   | 2099   | 11262  | 934   | 7323   | 1439  |
| 2949  | 602   | 2529   | 6823   | 1404  | 3054   | 868   |
| 491   | 1521  | 2832   | 9459   | 19    | 3067   | 1973  |
| 1914  | 595   | 1373   | 9487   | 1047  | 3258   | 1950  |
| 2764  | 424   | 1740   | 6714   | 471   | 3847   | 975   |
| 1540  | 186   | 1506   | 3436   | 169   | 3733   | 841   |
| 3433  | 549   | 2982   | 6373   | 1287  | 4733   | 865   |
| 791   | 212   | 959    | 1740   | 4     | 1212   | 28    |
| 628   | 2941  | 539    | 9094   | 31    | 2585   | 920   |
| 1881  | 14    | 728    | 3394   | 682   | 4094   | 865   |
| 478   | 172   | 1546   | 8012   | 189   | 2108   | 1343  |
| 966   | 138   | 1472   | 4898   | 2738  | 2224   | 1314  |
| 1910  | 1599  | 1514   | 4602   | 26    | 2533   | 2209  |
| 747   | 88    | 651    | 1278   | 93    | 1729   | 394   |
| 213   | 382   | 207    | 1338   | 10    | 837    | 81    |
| 670   | 428   | 1397   | 4655   | 125   | 1954   | 667   |
| 733   | 157   | 936    | 5182   | 10    | 2506   | 630   |
| 1214  | 202   | 1298   | 5766   | 66    | 3213   | 1208  |
| 1512  | 123   | 765    | 3285   | 174   | 2007   | 507   |
| 1255  | 120   | 918    | 4397   | 392   | 1512   | 344   |
| 550   | 175   | 579    | 4681   | 269   | 2088   | 1090  |
| 129   | 106   | 433    | 1690   | 9     | 767    | 178   |
| 41    | 79    | 66     | 195    | 6     | 144    | 36    |

|      |     |      |      |      |      |      |
|------|-----|------|------|------|------|------|
| 2392 | 438 | 1622 | 4366 | 139  | 2114 | 216  |
| 622  | 236 | 979  | 3131 | 2    | 1689 | 458  |
| 232  | 461 | 698  | 4507 | 12   | 1244 | 331  |
| 372  | 103 | 311  | 2696 | 1    | 1333 | 271  |
| 366  | 131 | 598  | 7405 | 81   | 781  | 465  |
| 411  | 29  | 1410 | 1546 | 20   | 395  | 1464 |
| 538  | 442 | 640  | 2261 | 346  | 1351 | 322  |
| 1361 | 140 | 1117 | 1937 | 218  | 1738 | 245  |
| 257  | 73  | 558  | 2504 | 4    | 1489 | 291  |
| 718  | 314 | 1035 | 2168 | 35   | 1279 | 349  |
| 314  | 175 | 376  | 1387 | 27   | 1345 | 357  |
| 816  | 146 | 433  | 3090 | 170  | 2575 | 217  |
| 409  | 38  | 665  | 1039 | 206  | 1059 | 340  |
| 256  | 9   | 366  | 703  | 87   | 482  | 428  |
| 566  | 56  | 559  | 2219 | 331  | 1650 | 185  |
| 158  | 30  | 634  | 2223 | 119  | 849  | 231  |
| 398  | 28  | 1130 | 1364 | 27   | 1025 | 146  |
| 526  | 20  | 383  | 1929 | 409  | 1023 | 133  |
| 675  | 36  | 695  | 1086 | 22   | 756  | 296  |
| 113  | 69  | 163  | 712  | 1    | 1101 | 87   |
| 177  | 50  | 251  | 656  | 18   | 464  | 305  |
| 384  | 2   | 260  | 1491 | 2711 | 571  | 138  |
| 416  | 160 | 450  | 947  | 1111 | 995  | 260  |
| 199  | 149 | 486  | 2576 | 7    | 980  | 121  |
| 312  | 319 | 474  | 1826 | 2    | 1036 | 142  |
| 560  | 36  | 356  | 1112 | 38   | 1129 | 190  |
| 337  | 217 | 370  | 1293 | 74   | 581  | 157  |
| 22   | 7   | 61   | 126  | 11   | 84   | 3    |
| 382  | 26  | 361  | 1762 | 96   | 710  | 97   |
| 192  | 58  | 236  | 982  | 7    | 959  | 86   |
| 72   | 245 | 249  | 1371 | 1    | 647  | 45   |
| 122  | 262 | 322  | 2157 | 1    | 996  | 165  |
| 265  | 25  | 197  | 628  | 139  | 612  | 227  |
| 352  | 160 | 312  | 944  | 212  | 510  | 189  |
| 296  | 81  | 185  | 818  | 165  | 368  | 332  |
| 31   | 66  | 176  | 1483 | 3    | 651  | 104  |
| 221  | 6   | 125  | 584  | 526  | 170  | 224  |
| 124  | 131 | 317  | 427  | 3    | 391  | 114  |
| 212  | 34  | 288  | 921  | 275  | 827  | 125  |
| 162  | 54  | 247  | 971  | 0    | 285  | 129  |
| 198  | 244 | 362  | 2134 | 0    | 396  | 165  |
| 126  | 17  | 173  | 973  | 3    | 430  | 109  |
| 170  | 48  | 135  | 921  | 694  | 331  | 117  |
| 91   | 61  | 165  | 676  | 9    | 235  | 206  |
| 124  | 68  | 187  | 919  | 1    | 501  | 39   |
| 106  | 26  | 179  | 1203 | 14   | 513  | 61   |
| 82   | 108 | 156  | 1025 | 6    | 450  | 256  |
| 209  | 24  | 80   | 588  | 111  | 440  | 123  |
| 186  | 32  | 85   | 978  | 413  | 192  | 183  |
| 102  | 24  | 139  | 459  | 0    | 286  | 133  |
| 94   | 20  | 137  | 753  | 20   | 598  | 144  |
| 237  | 9   | 170  | 525  | 35   | 436  | 66   |
| 96   | 38  | 83   | 424  | 4    | 508  | 102  |
| 98   | 105 | 142  | 472  | 3    | 425  | 48   |
| 98   | 105 | 142  | 472  | 3    | 425  | 48   |
| 87   | 14  | 184  | 1078 | 7    | 177  | 136  |
| 161  | 30  | 205  | 911  | 345  | 247  | 28   |
| 266  | 43  | 248  | 1072 | 4    | 336  | 87   |
| 99   | 22  | 63   | 492  | 0    | 491  | 66   |

|     |     |     |     |     |     |     |
|-----|-----|-----|-----|-----|-----|-----|
| 109 | 59  | 87  | 391 | 8   | 241 | 219 |
| 14  | 5   | 19  | 131 | 4   | 94  | 8   |
| 165 | 23  | 173 | 453 | 28  | 275 | 32  |
| 50  | 13  | 70  | 132 | 663 | 112 | 64  |
| 153 | 36  | 121 | 518 | 30  | 157 | 53  |
| 116 | 2   | 59  | 244 | 294 | 79  | 96  |
| 113 | 3   | 63  | 307 | 45  | 220 | 69  |
| 26  | 2   | 98  | 106 | 63  | 36  | 25  |
| 151 | 115 | 106 | 657 | 27  | 328 | 79  |
| 53  | 5   | 72  | 222 | 13  | 160 | 64  |
| 84  | 16  | 81  | 230 | 128 | 129 | 25  |
| 51  | 11  | 56  | 185 | 126 | 198 | 16  |
| 83  | 2   | 89  | 335 | 30  | 271 | 96  |
| 64  | 4   | 209 | 327 | 10  | 250 | 29  |
| 152 | 6   | 83  | 331 | 45  | 355 | 35  |
| 78  | 19  | 86  | 246 | 0   | 174 | 26  |
| 74  | 14  | 93  | 759 | 107 | 120 | 36  |
| 124 | 5   | 72  | 219 | 20  | 75  | 30  |
| 43  | 19  | 128 | 359 | 19  | 156 | 30  |
| 132 | 11  | 108 | 661 | 83  | 257 | 22  |
| 86  | 22  | 41  | 198 | 1   | 127 | 37  |
| 4   | 11  | 33  | 200 | 4   | 62  | 2   |
| 148 | 40  | 193 | 453 | 51  | 145 | 22  |
| 93  | 7   | 45  | 250 | 0   | 169 | 32  |
| 50  | 37  | 51  | 286 | 0   | 130 | 44  |
| 109 | 66  | 215 | 314 | 3   | 195 | 25  |
| 104 | 2   | 50  | 168 | 109 | 87  | 35  |
| 26  | 25  | 70  | 227 | 2   | 159 | 65  |
| 31  | 18  | 81  | 269 | 3   | 152 | 29  |
| 68  | 6   | 32  | 427 | 0   | 519 | 31  |
| 80  | 1   | 39  | 226 | 13  | 71  | 19  |
| 38  | 14  | 17  | 782 | 2   | 215 | 6   |
| 54  | 21  | 99  | 180 | 74  | 81  | 19  |
| 33  | 1   | 33  | 86  | 9   | 69  | 44  |
| 27  | 7   | 33  | 226 | 50  | 84  | 19  |
| 66  | 23  | 54  | 297 | 90  | 84  | 31  |
| 102 | 3   | 89  | 85  | 103 | 182 | 16  |
| 12  | 3   | 8   | 50  | 1   | 34  | 11  |
| 43  | 8   | 33  | 241 | 95  | 74  | 42  |
| 34  | 10  | 71  | 269 | 83  | 94  | 23  |
| 43  | 16  | 32  | 421 | 1   | 134 | 39  |
| 18  | 4   | 27  | 182 | 0   | 121 | 40  |
| 112 | 17  | 97  | 210 | 65  | 195 | 12  |
| 45  | 3   | 45  | 176 | 2   | 51  | 35  |
| 29  | 5   | 33  | 280 | 265 | 27  | 33  |
| 5   | 37  | 5   | 101 | 0   | 56  | 8   |
| 109 | 16  | 217 | 254 | 11  | 176 | 12  |
| 13  | 32  | 34  | 234 | 12  | 25  | 28  |
| 49  | 3   | 111 | 153 | 3   | 160 | 21  |
| 50  | 3   | 62  | 150 | 2   | 124 | 71  |
| 22  | 7   | 61  | 271 | 2   | 134 | 61  |
| 35  | 7   | 25  | 277 | 1   | 80  | 26  |
| 63  | 5   | 45  | 76  | 186 | 138 | 19  |
| 63  | 5   | 31  | 178 | 12  | 208 | 16  |
| 16  | 38  | 44  | 219 | 2   | 116 | 36  |
| 19  | 4   | 55  | 227 | 47  | 44  | 22  |
| 44  | 19  | 33  | 236 | 19  | 181 | 19  |
| 31  | 2   | 97  | 131 | 16  | 123 | 28  |
| 15  | 8   | 45  | 186 | 0   | 100 | 19  |

|    |    |    |     |     |     |    |
|----|----|----|-----|-----|-----|----|
| 54 | 0  | 15 | 158 | 27  | 117 | 9  |
| 12 | 12 | 61 | 225 | 0   | 98  | 24 |
| 36 | 4  | 25 | 91  | 21  | 78  | 27 |
| 45 | 5  | 56 | 172 | 107 | 91  | 7  |
| 13 | 7  | 41 | 172 | 0   | 98  | 17 |
| 88 | 22 | 25 | 228 | 2   | 204 | 11 |
| 23 | 13 | 16 | 168 | 23  | 108 | 3  |
| 17 | 4  | 33 | 169 | 5   | 55  | 18 |
| 62 | 2  | 20 | 48  | 179 | 2   | 1  |
| 1  | 17 | 29 | 359 | 0   | 90  | 16 |
| 20 | 1  | 21 | 177 | 6   | 78  | 47 |
| 48 | 12 | 24 | 100 | 4   | 113 | 21 |
| 58 | 5  | 62 | 99  | 14  | 65  | 31 |
| 23 | 4  | 16 | 29  | 13  | 44  | 13 |
| 11 | 19 | 10 | 81  | 0   | 31  | 8  |
| 38 | 11 | 95 | 171 | 4   | 80  | 21 |
| 21 | 1  | 20 | 186 | 90  | 55  | 9  |
| 27 | 14 | 63 | 119 | 18  | 53  | 34 |
| 23 | 0  | 16 | 85  | 3   | 50  | 20 |
| 32 | 10 | 13 | 301 | 1   | 113 | 49 |
| 64 | 0  | 46 | 104 | 55  | 28  | 14 |
| 24 | 5  | 28 | 49  | 32  | 61  | 36 |
| 11 | 1  | 34 | 106 | 0   | 54  | 8  |
| 80 | 2  | 15 | 123 | 22  | 144 | 3  |
| 26 | 3  | 61 | 118 | 30  | 56  | 17 |
| 43 | 29 | 35 | 142 | 0   | 62  | 31 |
| 20 | 1  | 18 | 140 | 4   | 134 | 1  |
| 60 | 3  | 54 | 204 | 21  | 35  | 5  |
| 65 | 4  | 16 | 57  | 52  | 35  | 22 |
| 15 | 8  | 30 | 138 | 2   | 74  | 21 |
| 24 | 22 | 18 | 123 | 0   | 142 | 21 |
| 35 | 1  | 53 | 124 | 63  | 73  | 17 |
| 13 | 9  | 35 | 108 | 5   | 122 | 11 |
| 23 | 28 | 32 | 84  | 26  | 47  | 30 |
| 16 | 8  | 30 | 74  | 5   | 52  | 12 |
| 21 | 4  | 25 | 138 | 5   | 73  | 15 |
| 0  | 0  | 2  | 16  | 0   | 13  | 0  |
| 32 | 0  | 41 | 68  | 0   | 51  | 4  |
| 11 | 1  | 2  | 11  | 0   | 34  | 0  |
| 35 | 5  | 61 | 116 | 22  | 58  | 9  |
| 14 | 3  | 12 | 59  | 7   | 24  | 12 |
| 25 | 3  | 33 | 125 | 24  | 42  | 8  |
| 44 | 6  | 20 | 152 | 0   | 129 | 8  |
| 21 | 0  | 16 | 77  | 22  | 58  | 13 |
| 20 | 2  | 21 | 43  | 32  | 59  | 10 |
| 37 | 2  | 42 | 41  | 24  | 83  | 3  |
| 29 | 2  | 22 | 58  | 13  | 27  | 9  |
| 17 | 2  | 25 | 77  | 0   | 22  | 10 |
| 2  | 7  | 23 | 71  | 0   | 43  | 15 |
| 26 | 4  | 27 | 34  | 15  | 44  | 18 |
| 2  | 9  | 8  | 44  | 0   | 21  | 2  |
| 24 | 2  | 16 | 65  | 40  | 39  | 4  |
| 20 | 3  | 22 | 69  | 0   | 40  | 2  |
| 30 | 5  | 22 | 49  | 97  | 29  | 7  |
| 8  | 2  | 4  | 35  | 102 | 24  | 11 |
| 10 | 1  | 4  | 54  | 0   | 12  | 13 |
| 8  | 27 | 9  | 117 | 1   | 43  | 14 |
| 25 | 4  | 22 | 89  | 3   | 24  | 1  |
| 35 | 2  | 21 | 140 | 1   | 82  | 8  |

|    |    |    |     |    |     |    |
|----|----|----|-----|----|-----|----|
| 16 | 4  | 23 | 36  | 5  | 31  | 1  |
| 5  | 2  | 20 | 71  | 0  | 24  | 8  |
| 10 | 4  | 2  | 45  | 0  | 22  | 15 |
| 10 | 4  | 2  | 45  | 0  | 22  | 15 |
| 22 | 0  | 6  | 74  | 3  | 69  | 5  |
| 10 | 0  | 18 | 70  | 26 | 31  | 8  |
| 5  | 2  | 10 | 38  | 11 | 20  | 10 |
| 18 | 6  | 14 | 94  | 2  | 115 | 4  |
| 9  | 5  | 16 | 98  | 0  | 25  | 9  |
| 11 | 3  | 11 | 78  | 3  | 36  | 6  |
| 15 | 6  | 14 | 36  | 3  | 23  | 4  |
| 13 | 0  | 75 | 106 | 1  | 56  | 0  |
| 21 | 0  | 11 | 32  | 78 | 12  | 2  |
| 5  | 10 | 11 | 102 | 0  | 23  | 11 |
| 13 | 0  | 21 | 13  | 5  | 10  | 8  |
| 11 | 5  | 5  | 63  | 2  | 39  | 0  |
| 11 | 0  | 19 | 56  | 0  | 17  | 7  |
| 1  | 2  | 4  | 11  | 2  | 9   | 0  |
| 20 | 2  | 23 | 113 | 5  | 15  | 8  |
| 8  | 6  | 22 | 36  | 0  | 24  | 12 |
| 6  | 1  | 12 | 32  | 11 | 36  | 8  |
| 16 | 1  | 35 | 48  | 18 | 41  | 3  |
| 8  | 5  | 20 | 34  | 0  | 23  | 11 |
| 18 | 0  | 14 | 32  | 4  | 49  | 8  |
| 7  | 0  | 8  | 31  | 23 | 41  | 2  |
| 15 | 5  | 16 | 68  | 1  | 52  | 4  |
| 15 | 1  | 14 | 77  | 14 | 32  | 4  |
| 0  | 0  | 0  | 0   | 0  | 2   | 1  |
| 8  | 1  | 2  | 25  | 73 | 23  | 5  |
| 20 | 2  | 24 | 48  | 16 | 22  | 5  |
| 18 | 0  | 8  | 27  | 32 | 29  | 5  |
| 30 | 1  | 11 | 112 | 1  | 49  | 0  |
| 10 | 2  | 13 | 24  | 0  | 15  | 7  |
| 1  | 0  | 1  | 32  | 0  | 11  | 0  |
| 13 | 1  | 3  | 40  | 3  | 11  | 10 |
| 16 | 0  | 14 | 91  | 0  | 31  | 5  |
| 4  | 1  | 14 | 46  | 0  | 0   | 0  |
| 14 | 0  | 19 | 30  | 12 | 22  | 1  |
| 5  | 1  | 30 | 83  | 2  | 36  | 1  |
| 7  | 1  | 6  | 24  | 20 | 7   | 7  |
| 7  | 0  | 3  | 55  | 5  | 27  | 2  |
| 13 | 0  | 22 | 52  | 4  | 29  | 5  |
| 30 | 8  | 11 | 46  | 1  | 63  | 3  |
| 10 | 0  | 13 | 29  | 20 | 21  | 2  |
| 13 | 0  | 6  | 31  | 14 | 24  | 3  |
| 11 | 1  | 19 | 22  | 4  | 20  | 8  |
| 15 | 0  | 11 | 81  | 0  | 28  | 4  |
| 17 | 1  | 10 | 145 | 1  | 51  | 0  |
| 0  | 2  | 19 | 76  | 0  | 2   | 4  |
| 5  | 13 | 4  | 24  | 0  | 28  | 2  |
| 0  | 2  | 5  | 10  | 1  | 20  | 25 |
| 14 | 0  | 4  | 20  | 17 | 14  | 1  |
| 5  | 2  | 8  | 33  | 0  | 20  | 8  |
| 18 | 5  | 1  | 71  | 3  | 69  | 0  |
| 14 | 3  | 10 | 33  | 9  | 41  | 4  |
| 1  | 6  | 12 | 75  | 0  | 20  | 3  |
| 20 | 2  | 12 | 39  | 2  | 12  | 7  |
| 6  | 1  | 9  | 28  | 10 | 25  | 2  |
| 13 | 3  | 5  | 31  | 46 | 6   | 3  |

|    |    |    |     |    |    |   |
|----|----|----|-----|----|----|---|
| 7  | 18 | 5  | 242 | 0  | 76 | 2 |
| 10 | 0  | 2  | 41  | 2  | 49 | 1 |
| 9  | 0  | 6  | 28  | 1  | 14 | 5 |
| 11 | 0  | 8  | 22  | 33 | 22 | 2 |
| 11 | 3  | 13 | 40  | 18 | 52 | 3 |
| 11 | 6  | 11 | 48  | 1  | 19 | 7 |
| 5  | 2  | 12 | 48  | 5  | 9  | 2 |
| 20 | 4  | 7  | 39  | 17 | 24 | 1 |
| 5  | 0  | 5  | 28  | 33 | 17 | 5 |
| 8  | 0  | 5  | 35  | 26 | 9  | 2 |
| 7  | 9  | 15 | 37  | 0  | 27 | 7 |
| 7  | 0  | 9  | 27  | 5  | 13 | 5 |
| 1  | 3  | 1  | 18  | 0  | 15 | 2 |
| 2  | 1  | 6  | 13  | 0  | 14 | 6 |
| 10 | 13 | 18 | 37  | 1  | 22 | 5 |
| 3  | 6  | 19 | 31  | 0  | 15 | 5 |
| 16 | 0  | 10 | 53  | 17 | 13 | 4 |
| 6  | 2  | 7  | 25  | 0  | 9  | 5 |
| 8  | 0  | 5  | 48  | 15 | 12 | 7 |
| 6  | 14 | 4  | 21  | 1  | 19 | 2 |
| 9  | 0  | 8  | 32  | 6  | 18 | 1 |
| 6  | 1  | 8  | 16  | 0  | 12 | 2 |
| 7  | 4  | 12 | 17  | 2  | 18 | 5 |
| 12 | 0  | 2  | 21  | 2  | 23 | 0 |
| 12 | 0  | 6  | 16  | 3  | 17 | 3 |
| 12 | 0  | 6  | 37  | 1  | 19 | 2 |
| 0  | 2  | 7  | 49  | 13 | 28 | 0 |
| 4  | 0  | 6  | 15  | 5  | 9  | 1 |
| 10 | 1  | 9  | 34  | 0  | 8  | 3 |
| 4  | 0  | 8  | 42  | 19 | 5  | 2 |
| 9  | 0  | 2  | 32  | 1  | 24 | 9 |
| 10 | 1  | 7  | 26  | 9  | 5  | 2 |
| 2  | 1  | 0  | 4   | 1  | 5  | 2 |
| 7  | 5  | 7  | 9   | 10 | 14 | 2 |
| 2  | 3  | 2  | 15  | 0  | 15 | 2 |
| 3  | 1  | 11 | 17  | 2  | 15 | 3 |
| 1  | 1  | 10 | 27  | 0  | 9  | 1 |
| 7  | 3  | 4  | 20  | 2  | 13 | 1 |
| 0  | 0  | 5  | 4   | 0  | 2  | 1 |
| 17 | 0  | 8  | 17  | 2  | 19 | 3 |
| 6  | 4  | 13 | 14  | 0  | 11 | 1 |
| 5  | 4  | 5  | 31  | 2  | 14 | 2 |
| 3  | 0  | 15 | 14  | 3  | 5  | 3 |
| 3  | 1  | 8  | 33  | 1  | 17 | 3 |
| 6  | 1  | 7  | 10  | 6  | 2  | 5 |
| 5  | 1  | 1  | 15  | 1  | 11 | 3 |
| 5  | 1  | 4  | 37  | 7  | 14 | 2 |
| 3  | 2  | 4  | 10  | 0  | 24 | 3 |
| 6  | 0  | 12 | 23  | 0  | 8  | 2 |
| 6  | 2  | 6  | 20  | 1  | 15 | 4 |
| 5  | 2  | 7  | 28  | 14 | 5  | 4 |
| 2  | 0  | 10 | 38  | 0  | 5  | 0 |
| 1  | 1  | 7  | 23  | 0  | 11 | 3 |
| 0  | 1  | 0  | 7   | 0  | 6  | 1 |
| 2  | 2  | 5  | 20  | 2  | 9  | 0 |
| 7  | 0  | 4  | 36  | 3  | 10 | 2 |
| 4  | 0  | 3  | 40  | 0  | 19 | 2 |
| 5  | 0  | 0  | 12  | 5  | 10 | 0 |
| 3  | 1  | 0  | 19  | 0  | 4  | 1 |

|   |   |    |    |    |    |   |
|---|---|----|----|----|----|---|
| 6 | 0 | 5  | 12 | 4  | 5  | 2 |
| 3 | 0 | 2  | 12 | 0  | 10 | 9 |
| 3 | 0 | 2  | 17 | 3  | 4  | 8 |
| 1 | 1 | 3  | 8  | 1  | 10 | 1 |
| 2 | 2 | 6  | 21 | 1  | 13 | 0 |
| 5 | 0 | 5  | 9  | 11 | 8  | 7 |
| 6 | 1 | 6  | 12 | 4  | 9  | 2 |
| 0 | 3 | 4  | 58 | 0  | 9  | 0 |
| 1 | 0 | 3  | 17 | 0  | 5  | 1 |
| 5 | 0 | 2  | 15 | 5  | 10 | 4 |
| 2 | 0 | 5  | 9  | 0  | 6  | 4 |
| 3 | 1 | 6  | 16 | 1  | 2  | 1 |
| 4 | 1 | 2  | 21 | 0  | 4  | 5 |
| 2 | 0 | 1  | 12 | 1  | 6  | 0 |
| 4 | 1 | 4  | 10 | 2  | 21 | 1 |
| 1 | 5 | 1  | 14 | 0  | 6  | 2 |
| 7 | 1 | 2  | 15 | 0  | 7  | 0 |
| 1 | 0 | 1  | 14 | 1  | 8  | 9 |
| 7 | 0 | 2  | 5  | 10 | 10 | 0 |
| 6 | 0 | 2  | 12 | 4  | 9  | 0 |
| 6 | 1 | 2  | 6  | 0  | 8  | 2 |
| 1 | 1 | 1  | 8  | 2  | 4  | 2 |
| 5 | 0 | 0  | 11 | 2  | 23 | 3 |
| 5 | 1 | 3  | 11 | 0  | 14 | 2 |
| 4 | 0 | 8  | 9  | 1  | 12 | 0 |
| 2 | 1 | 2  | 10 | 7  | 2  | 3 |
| 0 | 0 | 3  | 28 | 1  | 3  | 6 |
| 3 | 0 | 4  | 13 | 3  | 8  | 0 |
| 2 | 1 | 1  | 16 | 7  | 8  | 0 |
| 1 | 1 | 5  | 31 | 0  | 5  | 1 |
| 3 | 0 | 0  | 1  | 0  | 2  | 0 |
| 8 | 1 | 2  | 11 | 8  | 8  | 0 |
| 2 | 0 | 1  | 23 | 1  | 17 | 0 |
| 1 | 5 | 0  | 10 | 0  | 6  | 1 |
| 7 | 0 | 0  | 8  | 15 | 1  | 3 |
| 3 | 2 | 4  | 13 | 0  | 9  | 2 |
| 0 | 2 | 4  | 7  | 0  | 3  | 2 |
| 0 | 0 | 3  | 7  | 3  | 7  | 4 |
| 5 | 0 | 4  | 10 | 2  | 6  | 3 |
| 0 | 0 | 0  | 8  | 4  | 5  | 1 |
| 4 | 1 | 12 | 17 | 0  | 12 | 1 |
| 1 | 0 | 5  | 10 | 1  | 8  | 0 |
| 0 | 2 | 3  | 3  | 0  | 8  | 4 |
| 1 | 3 | 2  | 11 | 0  | 5  | 0 |
| 4 | 1 | 3  | 3  | 5  | 6  | 1 |
| 3 | 0 | 0  | 5  | 5  | 6  | 2 |
| 1 | 0 | 3  | 16 | 3  | 9  | 1 |
| 1 | 1 | 0  | 11 | 0  | 8  | 0 |
| 0 | 1 | 2  | 4  | 1  | 6  | 0 |
| 5 | 1 | 4  | 8  | 0  | 4  | 1 |
| 4 | 5 | 1  | 4  | 0  | 11 | 1 |
| 1 | 0 | 0  | 3  | 0  | 1  | 0 |
| 2 | 0 | 0  | 0  | 0  | 0  | 0 |
| 3 | 1 | 1  | 12 | 0  | 5  | 1 |
| 3 | 0 | 4  | 9  | 23 | 3  | 2 |
| 3 | 0 | 3  | 8  | 5  | 2  | 0 |
| 1 | 2 | 5  | 7  | 7  | 3  | 1 |
| 1 | 0 | 2  | 4  | 0  | 7  | 0 |
| 0 | 1 | 0  | 2  | 0  | 0  | 0 |

|   |   |   |    |   |    |   |
|---|---|---|----|---|----|---|
| 0 | 0 | 2 | 26 | 0 | 8  | 2 |
| 0 | 0 | 3 | 11 | 1 | 11 | 1 |
| 0 | 0 | 1 | 13 | 0 | 1  | 1 |
| 6 | 0 | 1 | 5  | 1 | 9  | 1 |
| 2 | 0 | 3 | 11 | 2 | 7  | 0 |
| 6 | 0 | 4 | 7  | 4 | 8  | 1 |
| 0 | 2 | 0 | 6  | 0 | 2  | 0 |
| 1 | 0 | 1 | 8  | 0 | 4  | 0 |
| 2 | 2 | 1 | 20 | 0 | 6  | 0 |
| 1 | 0 | 3 | 8  | 1 | 5  | 1 |
| 2 | 0 | 0 | 11 | 0 | 3  | 2 |
| 0 | 2 | 0 | 4  | 0 | 2  | 0 |
| 4 | 1 | 0 | 8  | 0 | 5  | 2 |
| 2 | 0 | 4 | 4  | 1 | 5  | 3 |
| 4 | 0 | 1 | 6  | 2 | 9  | 0 |
| 5 | 1 | 5 | 8  | 0 | 3  | 1 |
| 0 | 0 | 1 | 5  | 1 | 3  | 1 |
| 6 | 0 | 2 | 6  | 5 | 3  | 0 |
| 4 | 0 | 6 | 6  | 2 | 9  | 0 |
| 3 | 0 | 0 | 12 | 0 | 2  | 2 |
| 7 | 1 | 0 | 19 | 0 | 19 | 2 |
| 1 | 0 | 0 | 3  | 0 | 7  | 0 |
| 4 | 2 | 2 | 7  | 0 | 6  | 1 |
| 0 | 0 | 2 | 4  | 0 | 7  | 3 |
| 0 | 0 | 3 | 4  | 0 | 7  | 1 |
| 5 | 0 | 2 | 9  | 1 | 5  | 0 |
| 2 | 0 | 2 | 10 | 0 | 2  | 0 |
| 2 | 0 | 7 | 2  | 0 | 1  | 2 |
| 0 | 0 | 1 | 7  | 5 | 2  | 3 |
| 4 | 0 | 2 | 3  | 2 | 0  | 0 |
| 2 | 0 | 2 | 10 | 2 | 5  | 0 |
| 1 | 0 | 1 | 8  | 0 | 4  | 3 |
| 0 | 0 | 8 | 6  | 0 | 6  | 0 |
| 3 | 0 | 0 | 18 | 5 | 2  | 0 |
| 3 | 0 | 3 | 9  | 0 | 3  | 1 |
| 1 | 0 | 0 | 5  | 0 | 3  | 2 |
| 0 | 0 | 2 | 6  | 0 | 0  | 0 |
| 1 | 0 | 2 | 6  | 2 | 4  | 2 |
| 3 | 0 | 1 | 4  | 3 | 7  | 1 |
| 2 | 0 | 0 | 4  | 2 | 1  | 0 |
| 1 | 1 | 0 | 9  | 0 | 1  | 0 |
| 1 | 0 | 2 | 8  | 0 | 2  | 0 |
| 2 | 0 | 1 | 2  | 0 | 4  | 1 |
| 3 | 0 | 2 | 8  | 2 | 1  | 0 |
| 0 | 0 | 0 | 3  | 0 | 2  | 0 |
| 1 | 0 | 3 | 10 | 0 | 6  | 0 |
| 2 | 1 | 1 | 4  | 3 | 3  | 0 |
| 0 | 0 | 0 | 3  | 0 | 0  | 0 |
| 1 | 0 | 1 | 3  | 0 | 3  | 1 |
| 0 | 0 | 1 | 19 | 0 | 5  | 1 |
| 7 | 0 | 6 | 9  | 1 | 14 | 0 |
| 2 | 1 | 1 | 15 | 1 | 1  | 1 |
| 0 | 1 | 1 | 5  | 0 | 6  | 0 |
| 1 | 0 | 2 | 0  | 8 | 3  | 0 |
| 3 | 0 | 2 | 7  | 0 | 7  | 0 |
| 1 | 0 | 4 | 5  | 0 | 2  | 3 |
| 1 | 0 | 0 | 2  | 0 | 1  | 0 |
| 0 | 0 | 0 | 2  | 0 | 2  | 0 |
| 0 | 0 | 3 | 1  | 0 | 2  | 0 |





|         |        |         |         |        |         |        |
|---------|--------|---------|---------|--------|---------|--------|
| 71      | 72     | 73      | 74      | 75     | 76      | 77     |
| 6       | 7      | 8       | 9       | 10     | 11      | 12     |
| CHR_P   | CHR_P  | CHR_P   | CHR_P   | CHR_P  | CHR_P   | CHR_P  |
| A_6     | B_31   | C_4     | C_45    | D_11   | D_35    | D_5    |
| 1468719 | 409595 | 1862148 | 4820581 | 198165 | 2718285 | 905697 |
| CHR_P   | CHR_P  | CHR_P   | CHR_P   | CHR_P  | CHR_P   | CHR_P  |
| 17.52   | 4.55   | 14.33   | 10.06   | 12.27  | 10.92   | 8.96   |
| 0.79    | 0.06   | 1.06    | 1.01    | 0.52   | 1.31    | 6.69   |
| 1.13    | 9.21   | 1.13    | 3.52    | 5.04   | 3.42    | 2.97   |
| 1.98    | 0.64   | 2.35    | 1.97    | 0.48   | 2.10    | 1.42   |
| 1.38    | 0.98   | 1.27    | 2.11    | 4.04   | 1.87    | 1.47   |
| 0.38    | 6.05   | 1.89    | 1.97    | 0.01   | 1.76    | 1.19   |
| 0.76    | 1.41   | 1.04    | 1.32    | 0.20   | 1.04    | 1.34   |
| 0.09    | 0.26   | 0.23    | 0.97    | 0.14   | 0.23    | 0.34   |
| 0.44    | 0.14   | 0.78    | 0.93    | 0.13   | 1.38    | 0.37   |
| 1.14    | 0.79   | 1.37    | 0.72    | 0.15   | 0.60    | 1.12   |
| 0.80    | 1.15   | 0.89    | 0.49    | 0.86   | 0.80    | 0.34   |
| 0.48    | 0.38   | 0.41    | 0.60    | 0.37   | 0.45    | 0.32   |
| 0.47    | 0.79   | 0.54    | 0.44    | 0.07   | 0.74    | 0.25   |
| 0.46    | 0.10   | 0.50    | 0.62    | 1.88   | 0.34    | 0.20   |
| 0.14    | 1.30   | 0.35    | 0.52    | 0.01   | 0.59    | 0.20   |
| 0.27    | 0.03   | 0.21    | 0.25    | 0.76   | 0.41    | 0.03   |
| 0.12    | 0.23   | 0.17    | 0.32    | 0.01   | 0.28    | 0.19   |
| 0.23    | 0.12   | 0.16    | 0.32    | 0.23   | 0.27    | 0.30   |
| 0.12    | 0.21   | 0.19    | 0.30    | 0.02   | 0.22    | 0.20   |
| 0.20    | 0.37   | 0.12    | 0.16    | 0.16   | 0.15    | 0.48   |
| 0.10    | 0.13   | 0.16    | 0.20    | 0.52   | 0.16    | 0.23   |
| 0.23    | 0.07   | 0.16    | 0.19    | 0.03   | 0.15    | 0.12   |
| 0.13    | 0.24   | 0.08    | 0.05    | 0.01   | 0.12    | 0.19   |
| 0.08    | 0.05   | 0.04    | 0.16    | 0.02   | 0.07    | 0.18   |
| 0.05    | 0.21   | 0.08    | 0.30    | 0.01   | 0.08    | 0.30   |
| 0.18    | 0.11   | 0.11    | 0.11    | 0.18   | 0.10    | 0.13   |
| 0.12    | 0.02   | 0.10    | 0.10    | 1.74   | 0.18    | 0.06   |
| 0.04    | 0.32   | 0.14    | 0.14    | 0.01   | 0.07    | 0.20   |
| 0.06    | 0.02   | 0.10    | 0.10    | 0.05   | 0.10    | 0.09   |
| 0.11    | 0.07   | 0.08    | 0.05    | 0.08   | 0.10    | 0.09   |
| 0.07    | 0.16   | 0.09    | 0.17    | 0.01   | 0.11    | 0.12   |
| 0.10    | 0.03   | 0.13    | 0.14    | 0.07   | 0.10    | 0.05   |
| 0.05    | 0.12   | 0.06    | 0.09    | 0.02   | 0.08    | 0.04   |
| 0.02    | 0.13   | 0.03    | 0.07    | 0.00   | 0.08    | 0.03   |
| 0.04    | 0.02   | 0.09    | 0.09    | 0.05   | 0.09    | 0.09   |
| 0.09    | 0.04   | 0.11    | 0.09    | 0.03   | 0.06    | 0.09   |
| 0.05    | 0.17   | 0.06    | 0.10    | 0.03   | 0.06    | 0.24   |
| 0.05    | 0.13   | 0.08    | 0.13    | 0.02   | 0.04    | 0.16   |
| 0.07    | 0.01   | 0.04    | 0.05    | 0.19   | 0.03    | 0.16   |
| 0.07    | 0.07   | 0.05    | 0.05    | 0.93   | 0.05    | 0.02   |
| 0.08    | 0.01   | 0.02    | 0.08    | 0.83   | 0.03    | 0.04   |
| 0.04    | 0.04   | 0.04    | 0.08    | 0.17   | 0.09    | 0.05   |
| 0.06    | 0.05   | 0.04    | 0.05    | 0.26   | 0.04    | 0.03   |
| 0.01    | 0.12   | 0.05    | 0.06    | 0.00   | 0.04    | 0.07   |
| 0.04    | 0.05   | 0.02    | 0.06    | 0.19   | 0.04    | 0.07   |
| 0.06    | 0.03   | 0.03    | 0.05    | 0.09   | 0.05    | 0.03   |
| 0.03    | 0.01   | 0.03    | 0.02    | 0.03   | 0.04    | 0.03   |
| 0.07    | 0.04   | 0.05    | 0.04    | 0.24   | 0.06    | 0.03   |
| 0.02    | 0.02   | 0.02    | 0.01    | 0.00   | 0.01    | 0.00   |
| 0.01    | 0.23   | 0.01    | 0.06    | 0.01   | 0.03    | 0.03   |
| 0.04    | 0.00   | 0.01    | 0.02    | 0.13   | 0.05    | 0.03   |
| 0.01    | 0.01   | 0.03    | 0.05    | 0.04   | 0.02    | 0.05   |

|      |      |      |      |      |      |      |
|------|------|------|------|------|------|------|
| 0.02 | 0.01 | 0.03 | 0.03 | 0.51 | 0.03 | 0.05 |
| 0.04 | 0.13 | 0.03 | 0.03 | 0.00 | 0.03 | 0.08 |
| 0.02 | 0.01 | 0.01 | 0.01 | 0.02 | 0.02 | 0.01 |
| 0.00 | 0.03 | 0.00 | 0.01 | 0.00 | 0.01 | 0.00 |
| 0.01 | 0.03 | 0.02 | 0.03 | 0.02 | 0.02 | 0.02 |
| 0.02 | 0.01 | 0.02 | 0.04 | 0.00 | 0.03 | 0.02 |
| 0.03 | 0.02 | 0.02 | 0.04 | 0.01 | 0.04 | 0.04 |
| 0.03 | 0.01 | 0.01 | 0.02 | 0.03 | 0.02 | 0.02 |
| 0.03 | 0.01 | 0.02 | 0.03 | 0.07 | 0.02 | 0.01 |
| 0.01 | 0.01 | 0.01 | 0.03 | 0.05 | 0.02 | 0.04 |
| 0.00 | 0.01 | 0.01 | 0.01 | 0.00 | 0.01 | 0.01 |
| 0.00 | 0.01 | 0.00 | 0.00 | 0.00 | 0.00 | 0.00 |
| 0.05 | 0.03 | 0.03 | 0.03 | 0.03 | 0.03 | 0.01 |
| 0.01 | 0.02 | 0.02 | 0.02 | 0.00 | 0.02 | 0.02 |
| 0.01 | 0.04 | 0.01 | 0.03 | 0.00 | 0.01 | 0.01 |
| 0.01 | 0.01 | 0.01 | 0.02 | 0.00 | 0.02 | 0.01 |
| 0.01 | 0.01 | 0.01 | 0.05 | 0.02 | 0.01 | 0.02 |
| 0.01 | 0.00 | 0.02 | 0.01 | 0.00 | 0.00 | 0.05 |
| 0.01 | 0.03 | 0.01 | 0.02 | 0.06 | 0.02 | 0.01 |
| 0.03 | 0.01 | 0.02 | 0.01 | 0.04 | 0.02 | 0.01 |
| 0.01 | 0.01 | 0.01 | 0.02 | 0.00 | 0.02 | 0.01 |
| 0.02 | 0.02 | 0.02 | 0.01 | 0.01 | 0.02 | 0.01 |
| 0.01 | 0.01 | 0.01 | 0.01 | 0.01 | 0.02 | 0.01 |
| 0.02 | 0.01 | 0.01 | 0.02 | 0.03 | 0.03 | 0.01 |
| 0.01 | 0.00 | 0.01 | 0.01 | 0.04 | 0.01 | 0.01 |
| 0.01 | 0.00 | 0.01 | 0.00 | 0.02 | 0.01 | 0.02 |
| 0.01 | 0.00 | 0.01 | 0.02 | 0.06 | 0.02 | 0.01 |
| 0.00 | 0.00 | 0.01 | 0.02 | 0.02 | 0.01 | 0.01 |
| 0.01 | 0.00 | 0.02 | 0.01 | 0.01 | 0.01 | 0.01 |
| 0.01 | 0.00 | 0.01 | 0.01 | 0.08 | 0.01 | 0.00 |
| 0.01 | 0.00 | 0.01 | 0.01 | 0.00 | 0.01 | 0.01 |
| 0.00 | 0.01 | 0.00 | 0.00 | 0.00 | 0.01 | 0.00 |
| 0.00 | 0.00 | 0.00 | 0.00 | 0.00 | 0.01 | 0.01 |
| 0.01 | 0.00 | 0.00 | 0.01 | 0.50 | 0.01 | 0.00 |
| 0.01 | 0.01 | 0.01 | 0.01 | 0.21 | 0.01 | 0.01 |
| 0.00 | 0.01 | 0.01 | 0.02 | 0.00 | 0.01 | 0.00 |
| 0.01 | 0.03 | 0.01 | 0.01 | 0.00 | 0.01 | 0.01 |
| 0.01 | 0.00 | 0.01 | 0.01 | 0.01 | 0.01 | 0.01 |
| 0.01 | 0.02 | 0.01 | 0.01 | 0.01 | 0.01 | 0.01 |
| 0.00 | 0.00 | 0.00 | 0.00 | 0.00 | 0.00 | 0.00 |
| 0.01 | 0.00 | 0.01 | 0.01 | 0.02 | 0.01 | 0.00 |
| 0.00 | 0.00 | 0.00 | 0.01 | 0.00 | 0.01 | 0.00 |
| 0.00 | 0.02 | 0.00 | 0.01 | 0.00 | 0.01 | 0.00 |
| 0.00 | 0.02 | 0.01 | 0.01 | 0.00 | 0.01 | 0.01 |
| 0.01 | 0.00 | 0.00 | 0.00 | 0.03 | 0.01 | 0.01 |
| 0.01 | 0.01 | 0.01 | 0.01 | 0.04 | 0.01 | 0.01 |
| 0.01 | 0.01 | 0.00 | 0.01 | 0.03 | 0.00 | 0.01 |
| 0.00 | 0.01 | 0.00 | 0.01 | 0.00 | 0.01 | 0.00 |
| 0.00 | 0.00 | 0.00 | 0.00 | 0.10 | 0.00 | 0.01 |
| 0.00 | 0.01 | 0.01 | 0.00 | 0.00 | 0.00 | 0.00 |
| 0.00 | 0.00 | 0.00 | 0.01 | 0.05 | 0.01 | 0.00 |
| 0.00 | 0.00 | 0.00 | 0.01 | 0.00 | 0.00 | 0.00 |
| 0.00 | 0.02 | 0.01 | 0.01 | 0.00 | 0.00 | 0.01 |
| 0.00 | 0.00 | 0.00 | 0.01 | 0.00 | 0.01 | 0.00 |
| 0.00 | 0.00 | 0.00 | 0.01 | 0.13 | 0.00 | 0.00 |
| 0.00 | 0.00 | 0.00 | 0.00 | 0.00 | 0.00 | 0.01 |
| 0.00 | 0.01 | 0.00 | 0.01 | 0.00 | 0.01 | 0.00 |
| 0.00 | 0.00 | 0.00 | 0.01 | 0.00 | 0.01 | 0.00 |
| 0.00 | 0.01 | 0.00 | 0.01 | 0.00 | 0.01 | 0.00 |







|       |       |       |       |       |       |       |
|-------|-------|-------|-------|-------|-------|-------|
| -0.29 | -0.89 | 0.38  | 0.67  | -0.92 | 1.58  | -0.43 |
| 0.99  | 0.07  | 1.55  | -0.11 | -1.57 | -0.42 | 0.93  |
| 1.24  | 2.54  | 1.56  | 0.06  | 1.47  | 1.23  | -0.49 |
| -0.14 | -1.03 | -0.74 | 1.01  | -1.12 | -0.36 | -1.54 |
| 0.67  | 2.51  | 1.06  | 0.47  | -1.64 | 2.20  | -0.62 |
| -0.02 | -2.12 | 0.21  | 0.87  | 8.15  | -0.75 | -1.54 |
| -0.36 | 4.99  | 0.60  | 1.39  | -0.97 | 1.68  | -0.07 |
| -0.12 | -1.16 | -0.39 | -0.22 | 2.03  | 0.50  | -1.14 |
| -0.26 | 0.45  | 0.05  | 1.04  | -0.95 | 0.76  | 0.23  |
| 0.11  | -0.96 | -0.55 | 1.06  | 0.14  | 0.57  | 0.84  |
| -0.59 | 0.22  | 0.08  | 1.05  | -1.42 | 0.30  | 0.15  |
| -0.35 | 1.34  | -1.13 | -0.70 | -0.71 | -0.85 | 2.53  |
| -0.90 | -0.39 | 0.11  | 0.69  | 5.89  | 0.10  | 1.10  |
| 1.24  | -1.31 | 0.15  | 0.58  | -1.85 | -0.09 | -0.41 |
| 0.15  | 1.49  | -0.51 | -0.82 | -1.38 | 0.02  | 0.87  |
| -0.39 | -0.62 | -0.71 | 0.40  | -0.94 | -0.51 | 0.60  |
| -0.49 | 0.49  | -0.32 | 1.01  | -0.71 | -0.29 | 1.03  |
| 1.16  | -0.07 | -0.18 | -0.02 | 1.25  | -0.28 | 0.21  |
| -0.33 | -1.95 | -0.66 | -0.61 | 25.44 | 0.66  | -1.20 |
| -0.68 | 1.99  | 0.23  | 0.23  | -0.94 | -0.41 | 0.84  |
| -0.89 | -1.65 | -0.22 | -0.14 | -1.08 | -0.13 | -0.26 |
| 0.19  | -0.63 | -0.63 | -1.33 | -0.57 | 0.05  | -0.28 |
| -0.47 | 1.58  | -0.07 | 1.86  | -1.86 | 0.52  | 0.66  |
| -0.40 | -1.70 | 0.08  | 0.30  | -0.98 | -0.34 | -1.37 |
| -0.17 | 0.95  | -0.06 | 0.52  | -0.66 | 0.34  | -0.36 |
| -0.27 | 0.34  | -0.21 | -0.01 | -0.38 | 0.04  | -0.24 |
| -1.17 | -1.69 | -0.15 | -0.03 | -1.05 | -0.07 | -0.19 |
| -0.33 | -0.65 | -0.22 | -0.30 | -0.72 | -0.54 | -0.30 |
| -0.78 | 0.70  | -0.58 | -0.11 | -1.00 | -0.58 | 1.53  |
| -0.46 | 0.36  | -0.11 | 0.39  | -0.70 | -0.52 | 0.68  |
| -0.31 | -1.03 | -0.70 | -0.56 | 1.07  | -0.83 | 0.67  |
| -0.21 | -0.28 | -0.39 | -0.39 | 6.68  | -0.40 | -0.62 |
| 0.09  | -1.43 | -1.05 | 0.00  | 15.37 | -0.85 | -0.70 |
| -0.83 | -0.94 | -0.99 | 0.23  | 3.15  | 0.54  | -0.52 |
| -0.01 | -0.67 | -0.85 | -0.73 | 7.94  | -1.14 | -1.35 |
| -0.67 | 2.05  | 0.27  | 0.66  | -0.84 | -0.03 | 0.82  |
| -0.45 | -0.33 | -0.83 | 0.04  | 2.81  | -0.51 | 0.15  |
| 0.98  | -0.94 | -1.21 | -0.07 | 2.97  | -0.06 | -0.84 |
| -0.30 | -1.05 | -0.61 | -0.71 | -0.38 | 0.14  | -0.43 |
| 0.83  | -0.21 | 0.04  | -0.21 | 6.29  | 0.21  | -0.62 |
| 0.20  | 0.19  | 0.18  | 0.01  | -0.37 | 0.10  | -0.37 |
| -0.38 | 4.63  | -0.48 | 0.72  | -0.56 | 0.01  | 0.06  |
| 0.29  | -1.85 | -1.24 | -0.67 | 4.92  | 0.71  | -0.24 |
| -0.70 | -0.61 | -0.23 | 0.58  | 0.02  | -0.27 | 0.40  |
| -1.14 | -1.92 | -0.82 | -0.19 | 36.59 | -0.72 | 0.87  |
| 0.65  | 5.13  | -0.17 | 0.11  | -1.28 | 0.05  | 2.62  |
| -0.49 | -1.00 | -0.77 | -0.90 | -0.43 | -0.25 | -0.60 |

|       |       |       |       |       |       |       |
|-------|-------|-------|-------|-------|-------|-------|
| -0.19 | 0.85  | -0.24 | -0.01 | -0.31 | 0.02  | -0.26 |
| -1.09 | 0.47  | -0.34 | 0.28  | -0.39 | -0.40 | -0.34 |
| -0.67 | -0.96 | -0.67 | 0.92  | -1.84 | 0.47  | -0.13 |
| -0.31 | -1.09 | -0.63 | 0.63  | -1.36 | 0.56  | 0.93  |
| -0.21 | -0.82 | -0.73 | -0.49 | -0.23 | -0.45 | -0.60 |
| 0.21  | -1.21 | -0.72 | 0.42  | 3.88  | -0.54 | -0.99 |
| -0.84 | -0.68 | -1.01 | 0.80  | 2.31  | 0.22  | 1.40  |
| -0.51 | -0.07 | -0.15 | 0.17  | -0.60 | -0.02 | -0.23 |
| -0.26 | -0.01 | -0.24 | -0.24 | -0.25 | -0.22 | -0.24 |
| 1.30  | 0.30  | -0.10 | 0.01  | -0.21 | -0.25 | -1.25 |
| -0.29 | 0.21  | 0.02  | 0.45  | -1.55 | 0.34  | -0.02 |
| -0.52 | 1.79  | -0.01 | 1.35  | -0.72 | 0.19  | -0.02 |
| -0.23 | -0.22 | -0.51 | 0.78  | -1.01 | 0.53  | -0.07 |
| -0.55 | -0.27 | -0.29 | 4.27  | 0.26  | -0.40 | 0.44  |
| -0.31 | -0.40 | -0.12 | -0.29 | -0.38 | -0.37 | 0.25  |
| -0.70 | 0.94  | -0.75 | -0.44 | 3.01  | -0.39 | -0.71 |
| 0.90  | -0.92 | -0.13 | -0.72 | 1.98  | 0.02  | -1.15 |
| -0.42 | -0.40 | -0.05 | 0.64  | -0.87 | 0.71  | 0.03  |
| 0.23  | 1.44  | 0.50  | 0.11  | -0.97 | 0.17  | -0.19 |
| -0.52 | 0.35  | -0.57 | -0.20 | -0.75 | 0.61  | 0.21  |
| 0.04  | -0.47 | -0.81 | 0.31  | 1.19  | 1.10  | -0.78 |
| -0.68 | -1.39 | -0.38 | -0.90 | 2.88  | -0.24 | -0.29 |
| -0.41 | -0.54 | -0.40 | -0.43 | -0.14 | -0.41 | -0.16 |
| -0.49 | -1.21 | -0.74 | -0.23 | 4.02  | 0.18  | -1.01 |
| -1.06 | -1.16 | -0.37 | 0.03  | 0.68  | -0.44 | -0.61 |
| -0.47 | -1.73 | 1.62  | -0.35 | -1.18 | 0.22  | -1.14 |
| -0.13 | -1.53 | -0.82 | 0.11  | 9.10  | -0.03 | -1.08 |
| -0.17 | -1.26 | -0.43 | -0.85 | -1.15 | -0.70 | -0.55 |
| -0.40 | -0.26 | -0.38 | -0.29 | -0.50 | 0.10  | -0.37 |
| -0.69 | -0.67 | -0.61 | -0.59 | -0.77 | -0.41 | 0.50  |
| -0.08 | -1.53 | -0.77 | 0.24  | 87.60 | -0.36 | -0.68 |
| -0.83 | -0.10 | -1.10 | -1.35 | 38.57 | -0.28 | -0.78 |
| -0.30 | 0.94  | 0.36  | 1.87  | -0.79 | 0.91  | -0.30 |
| -0.42 | 4.46  | -0.07 | 1.06  | -2.12 | 1.03  | -0.87 |
| 0.04  | -1.12 | -0.72 | -0.53 | -0.59 | 0.19  | -0.63 |
| -0.16 | 2.38  | -0.41 | 0.21  | 1.49  | -0.27 | -0.60 |
| -0.23 | -0.21 | -0.12 | -0.16 | 0.07  | -0.13 | -0.30 |
| 0.44  | -1.22 | -0.13 | 1.41  | 2.97  | 0.47  | -0.85 |
| -0.32 | -0.24 | -0.35 | 0.18  | -0.90 | 1.13  | -0.54 |
| -0.40 | 2.99  | 0.11  | 1.07  | -0.66 | 0.76  | -0.39 |
| -0.66 | 2.93  | -0.10 | 1.72  | -1.15 | 1.15  | -0.02 |
| -0.51 | -1.41 | -1.08 | -0.87 | 4.27  | -0.16 | 0.05  |
| 0.27  | 2.19  | -0.61 | -0.20 | 12.40 | -0.34 | -0.07 |
| -0.22 | -0.22 | -1.00 | -0.43 | 5.57  | -0.71 | 1.08  |
| -0.66 | 0.38  | -0.12 | 1.49  | -0.69 | 0.96  | 0.04  |
| -0.18 | -0.93 | -0.65 | -0.33 | 15.97 | -0.67 | 0.37  |
| -0.93 | 2.17  | 0.17  | -0.85 | -1.79 | -0.15 | -0.37 |
| -0.63 | -1.04 | -0.56 | -0.28 | 9.27  | 0.48  | -0.66 |



|       |       |       |       |       |       |       |
|-------|-------|-------|-------|-------|-------|-------|
| -0.40 | -0.34 | -0.35 | -0.15 | -0.70 | -0.42 | -0.31 |
| -0.10 | 4.86  | 0.52  | 3.26  | -1.53 | 0.03  | 0.42  |
| -0.19 | -0.59 | -0.13 | 0.92  | -0.82 | 0.49  | 0.14  |
| -0.52 | -0.49 | -0.94 | 0.25  | 37.19 | -0.45 | -0.37 |
| -0.68 | -0.27 | -0.56 | -0.30 | -0.73 | -0.56 | 0.10  |
| -0.34 | 0.51  | -0.18 | 0.78  | -1.13 | 0.69  | -0.75 |
| -0.47 | -0.56 | -0.18 | 1.75  | -0.36 | 0.96  | -0.52 |
| -0.87 | 1.52  | -0.56 | 0.95  | -1.10 | 0.38  | 1.73  |
| -0.08 | -1.41 | -1.68 | -0.36 | 8.02  | 0.26  | -0.16 |
| -0.03 | -0.52 | -0.88 | 0.83  | 23.97 | -0.61 | 0.80  |
| -0.43 | -0.56 | -0.37 | -0.07 | -1.33 | 0.04  | 0.59  |
| -0.72 | -0.89 | -0.61 | 0.43  | -0.09 | 1.16  | 0.44  |
| 0.14  | -1.78 | -0.83 | -0.55 | 0.72  | 0.14  | -1.07 |
| -0.71 | -0.12 | -1.13 | -0.20 | -1.56 | 1.81  | 0.29  |
| -0.45 | 2.16  | -0.33 | 0.00  | -1.12 | 0.77  | -0.63 |
| -0.45 | 2.16  | -0.33 | 0.00  | -1.12 | 0.77  | -0.63 |
| -0.68 | -0.90 | -0.34 | 0.82  | -0.85 | -0.63 | 0.14  |
| -0.02 | -0.43 | -0.02 | 0.94  | 21.70 | -0.23 | -0.92 |
| 1.47  | 0.02  | 0.53  | 2.38  | -1.60 | 0.37  | -0.16 |
| -0.18 | -0.33 | -0.57 | 0.24  | -0.96 | 1.14  | -0.11 |
| -0.15 | 0.88  | -0.54 | -0.02 | -0.54 | 0.07  | 2.29  |
| -0.28 | -0.25 | -0.27 | -0.07 | -0.12 | 0.01  | -0.29 |
| -0.12 | -0.88 | -0.39 | -0.34 | 0.58  | -0.26 | -1.17 |
| -0.85 | -0.88 | -0.80 | -0.95 | 59.63 | -0.73 | -0.26 |
| 0.20  | -0.05 | -0.45 | 0.29  | 1.36  | -0.56 | -0.54 |
| -0.27 | -1.10 | -0.80 | -0.57 | 17.98 | -0.82 | 0.05  |
| -0.26 | -0.76 | -0.57 | -0.34 | 1.07  | -0.22 | -0.26 |
| -0.52 | -0.69 | -0.06 | -0.46 | 4.14  | -0.58 | -0.38 |
| 0.84  | 5.37  | -0.31 | 1.75  | 2.19  | 1.31  | 0.48  |
| -0.72 | -1.25 | -0.66 | -0.47 | 0.17  | -0.19 | 0.08  |
| -0.39 | -0.61 | -0.56 | -0.49 | 8.27  | -0.51 | -0.76 |
| -0.23 | -0.36 | -0.31 | -0.14 | 12.56 | 0.48  | -0.53 |
| -0.43 | -1.87 | -0.68 | -0.02 | 2.86  | 0.80  | 0.99  |

| 34           | 1            | 2            | 3             | 4            | 5           | 6            |
|--------------|--------------|--------------|---------------|--------------|-------------|--------------|
| 70           | 72           | 73           | 74            | 75           | 76          | 77           |
| TAAAGTGCTTAT | TGGCTCAGTTCA | TATGGCACTGGT | CTATACGACCTGC | CGGGGCAGCTCA | TGAGGTAGTAA | CATGCCTTGAGT |
| miR-20a-5p   | miR-24-3p    | miR-183-5p   | let-7d-3p     | miR-486-3p   | miR-98-5p   | miR-532-5p   |
| 79678        | 78156        | 75744        | 71988         | 70256        | 69114       | 68018        |
| -0.66        | 0.04         | -0.38        | 2.00          | 0.34         | -0.69       | 0.47         |
| 0.38         | 0.17         | 4.86         | -0.96         | 1.41         | 0.68        | -0.58        |
| 1.06         | -0.36        | 0.04         | -1.06         | 0.18         | 0.20        | 0.97         |
| -0.16        | -0.38        | -0.03        | -1.08         | 1.09         | -0.42       | 0.55         |
| -0.02        | 1.53         | -0.18        | 1.76          | -0.48        | -0.04       | -1.82        |
| -0.80        | -1.10        | -0.40        | 2.96          | 0.43         | -0.48       | -0.91        |
| -0.51        | -0.71        | -0.40        | 1.52          | -0.21        | -0.64       | -0.54        |
| -0.90        | -0.94        | -0.37        | 0.51          | 1.71         | -0.81       | -1.00        |
| -0.74        | -1.07        | 0.14         | -0.69         | -0.52        | -0.37       | 0.74         |
| -0.23        | -0.09        | 0.41         | -0.60         | -0.69        | -0.22       | 1.18         |
| -0.26        | -0.03        | 0.32         | -0.34         | -0.98        | 0.18        | 0.10         |
| -0.83        | -0.96        | -0.40        | -0.40         | 0.73         | -0.56       | -0.87        |
| 1.81         | 3.38         | -0.36        | -0.14         | -1.18        | 3.58        | 0.81         |
| -0.77        | -0.73        | -0.29        | -0.45         | 1.84         | -0.77       | -0.96        |
| 0.29         | 0.21         | -0.13        | -0.39         | -0.43        | 0.08        | 1.51         |
| 0.61         | 0.40         | -0.19        | 0.00          | -0.92        | 1.25        | 0.48         |
| -0.49        | 0.11         | -0.27        | 0.45          | -0.33        | -0.80       | -0.06        |
| -0.06        | 0.28         | -0.37        | -0.47         | 0.27         | 0.00        | 2.70         |
| -0.43        | 0.76         | 0.07         | -0.61         | -1.30        | -0.10       | 0.35         |
| 2.88         | 2.03         | -0.29        | -0.72         | -0.85        | 1.50        | 0.67         |

|       |       |       |       |       |       |       |
|-------|-------|-------|-------|-------|-------|-------|
| -0.40 | -0.57 | -0.19 | -0.43 | 0.68  | -0.23 | -0.08 |
| -0.67 | -0.22 | -0.36 | 0.11  | 0.36  | -0.79 | -0.21 |
| -0.40 | -0.34 | -0.37 | 0.04  | 0.67  | -0.63 | -0.38 |
| -0.62 | -0.44 | -0.39 | -0.19 | 1.76  | -0.83 | -0.75 |
| -0.47 | -0.65 | -0.33 | 0.40  | -0.82 | -0.13 | -1.54 |
| -0.20 | 0.39  | -0.30 | -0.16 | -1.30 | -0.66 | -1.00 |
| 2.60  | -0.69 | 0.20  | -1.04 | -1.47 | 1.70  | 0.18  |
| 5.46  | -0.10 | -0.05 | -1.28 | -1.05 | 7.47  | 0.35  |
| -0.23 | -0.30 | -0.13 | -0.73 | -0.93 | 1.54  | 0.59  |
| -0.61 | -0.30 | 1.30  | -0.94 | 0.04  | 0.41  | 1.88  |
| -0.48 | -1.09 | 2.34  | -0.76 | 2.34  | -0.51 | -0.44 |
| 1.46  | 0.01  | 1.93  | -0.98 | -0.57 | 3.02  | 0.10  |
| 1.67  | 1.63  | -0.33 | 0.55  | -0.02 | 0.99  | -1.48 |
| -0.58 | 0.33  | -0.35 | 1.63  | 0.02  | -0.78 | -0.17 |
| -0.53 | 3.37  | -0.20 | 0.28  | 0.12  | -0.70 | -0.19 |
| -0.71 | -0.04 | -0.39 | 0.33  | -0.35 | -0.73 | 0.09  |
| -1.00 | -1.41 | -0.40 | -0.01 | 4.26  | -0.86 | -1.29 |
| -0.30 | 0.73  | -0.39 | 0.55  | -0.77 | 0.44  | 0.90  |
| 1.38  | 2.86  | -0.26 | -0.02 | -1.19 | 2.47  | 2.80  |
| -0.67 | 0.14  | -0.36 | -0.33 | -1.38 | -0.56 | -0.77 |
| -0.49 | 4.04  | -0.34 | 1.22  | 1.65  | -0.68 | -0.44 |
| -0.65 | 9.21  | -0.40 | 0.55  | 1.80  | -0.12 | 0.00  |
| -0.54 | 0.42  | -0.32 | 0.23  | -0.84 | -0.62 | -0.96 |
| 0.34  | 2.26  | -0.21 | -0.07 | -1.21 | 0.54  | 1.33  |
| -0.85 | -0.96 | -0.35 | 0.24  | -0.34 | -0.55 | -0.82 |
| -0.71 | 0.38  | -0.37 | 1.15  | 0.83  | -0.88 | -1.26 |
| -0.14 | 2.15  | -0.20 | -0.23 | -1.36 | -0.12 | -0.37 |
| -0.67 | 0.20  | -0.37 | 0.47  | -0.63 | -0.55 | -0.53 |
| -0.10 | 0.64  | -0.21 | 0.02  | 0.04  | -0.48 | 0.00  |
| -0.49 | 0.68  | -0.28 | -0.31 | -0.51 | -0.77 | -0.01 |
| 0.16  | 0.94  | -0.28 | -0.21 | -0.61 | -0.31 | 0.13  |
| -0.63 | 0.19  | -0.25 | 0.31  | -0.57 | -0.75 | -0.21 |
| -0.36 | 0.13  | -0.14 | 0.12  | 0.43  | -0.63 | -0.09 |
| -0.02 | 2.62  | -0.33 | 0.24  | -0.60 | -0.26 | 0.03  |
| -0.77 | -0.87 | -0.19 | 0.32  | 1.69  | -0.59 | -0.38 |
| -0.66 | -0.15 | -0.31 | -0.19 | 0.44  | -0.80 | -0.19 |
| -0.43 | -0.60 | -0.10 | -0.38 | -0.02 | -0.41 | 0.17  |
| 7.69  | 0.66  | -0.27 | -1.23 | -1.58 | 4.07  | 0.44  |
| -0.52 | -0.36 | -0.37 | -0.33 | -0.58 | -0.61 | -0.66 |
| 0.44  | 0.29  | -0.35 | 0.48  | -1.25 | 0.31  | -0.97 |
| 0.99  | 1.73  | -0.34 | 0.37  | -1.28 | 0.12  | -1.25 |
| 5.62  | -0.75 | -0.21 | -1.31 | -1.61 | 3.39  | 0.92  |
| -0.51 | -0.96 | -0.19 | -0.53 | -0.92 | -0.77 | -0.16 |
| -0.33 | -0.93 | -0.25 | -0.25 | -1.00 | -0.34 | -0.31 |
| 0.64  | -0.34 | -0.24 | -1.02 | -1.29 | 0.17  | 0.62  |
| 0.84  | -0.29 | -0.32 | -1.12 | 0.75  | 0.72  | 1.70  |
| 0.43  | 0.11  | 0.08  | -0.55 | -0.74 | 0.99  | 1.27  |
| -0.31 | -0.34 | 1.32  | 0.29  | -0.93 | 0.88  | -0.54 |
| 1.20  | 0.53  | -0.22 | 0.05  | 5.61  | 0.19  | -0.18 |
| 1.19  | 2.33  | -0.16 | -0.18 | 1.25  | 0.57  | -0.29 |
| -0.23 | -0.55 | -0.31 | -0.70 | 0.90  | -0.42 | 0.23  |
| -0.22 | -0.27 | -0.40 | 0.94  | -0.92 | -0.40 | 1.44  |
| -0.51 | -0.29 | -0.12 | -0.75 | -0.13 | -0.05 | 0.50  |
| 0.78  | 4.27  | -0.29 | -0.44 | -0.72 | 0.64  | 0.11  |
| -1.01 | 0.26  | -0.38 | 3.01  | 1.98  | -0.87 | -0.97 |
| 0.53  | -0.40 | -0.37 | -0.39 | 0.02  | 0.71  | 0.17  |
| -0.07 | 0.44  | 0.25  | -0.71 | -1.15 | 0.03  | -0.19 |
| -0.78 | -1.22 | 0.09  | 0.03  | -0.59 | 0.81  | -1.09 |
| 2.54  | 2.70  | 0.01  | -0.95 | -0.68 | 1.50  | 1.84  |

|       |       |       |       |       |       |       |
|-------|-------|-------|-------|-------|-------|-------|
| -0.08 | 1.54  | 0.00  | -0.64 | -1.16 | 0.42  | 0.00  |
| -0.54 | -0.27 | 0.25  | -0.36 | -0.24 | -0.72 | -0.93 |
| -0.33 | 0.54  | -0.19 | -0.72 | -0.97 | 0.35  | -0.38 |
| -0.64 | -0.31 | -0.40 | 2.09  | 0.20  | -0.72 | -1.02 |
| 2.21  | 2.41  | -0.31 | -0.63 | -1.08 | 2.76  | 0.71  |
| 6.90  | 0.95  | -0.28 | -1.22 | -1.23 | 3.98  | 0.35  |
| -0.52 | 0.53  | -0.38 | 0.02  | -0.42 | -0.68 | -0.44 |
| -0.29 | 1.32  | -0.29 | -0.36 | -1.05 | -0.47 | -0.24 |
| -0.51 | 0.13  | -0.03 | -0.56 | -0.10 | -0.63 | -0.52 |
| 0.37  | 1.14  | -0.13 | -0.64 | -0.49 | 0.66  | 2.45  |
| -0.38 | 1.19  | -0.20 | -0.36 | -0.10 | -0.62 | 0.50  |
| 2.20  | 0.11  | -0.26 | -1.24 | -0.41 | 3.61  | 1.02  |
| -0.71 | -0.67 | -0.25 | -0.50 | -0.22 | -0.62 | 0.20  |
| -0.50 | 0.23  | -0.37 | 0.04  | 0.44  | -0.72 | -0.39 |
| 0.19  | -0.64 | 0.23  | -0.91 | -1.53 | 1.54  | -0.23 |
| -0.39 | -0.57 | 0.14  | 0.11  | -1.33 | 0.16  | 0.38  |
| 0     | 0     | -1    | -1    | 1     | 0     | 0     |
| 0.00  | 0.00  | 0.00  | 0.00  | 0.00  | 0.00  | 0.00  |
| 1.00  | 1.00  | 1.00  | 1.00  | 1.00  | 1.00  | 1.00  |
| 0.83  | 0.67  | 0.94  | 0.32  | 0.75  | 0.61  | 0.27  |

| 68           | 69           | 70           | 71            | 72           | 73          | 74           |
|--------------|--------------|--------------|---------------|--------------|-------------|--------------|
| TAAAGTGCTTAT | TGGCTCAGTTCA | TATGGCACTGGT | CTATACGACCTGC | CGGGGCAGCTCA | TGAGGTAGTAA | CATGCCTTGAGT |
| miR-20a-5p   | miR-24-3p    | miR-183-5p   | let-7d-3p     | miR-486-3p   | miR-98-5p   | miR-532-5p   |
| 79678        | 78156        | 75744        | 71988         | 70256        | 69114       | 68018        |
| -0.66        | 0.04         | -0.38        | 2.00          | 0.34         | -0.69       | 0.47         |
| 0.38         | 0.17         | 4.86         | -0.96         | 1.41         | 0.68        | -0.58        |
| 1.06         | -0.36        | 0.04         | -1.06         | 0.18         | 0.20        | 0.97         |
| -0.16        | -0.38        | -0.03        | -1.08         | 1.09         | -0.42       | 0.55         |
| -0.02        | 1.53         | -0.18        | 1.76          | -0.48        | -0.04       | -1.82        |
| -0.80        | -1.10        | -0.40        | 2.96          | 0.43         | -0.48       | -0.91        |
| -0.51        | -0.71        | -0.40        | 1.52          | -0.21        | -0.64       | -0.54        |
| -0.90        | -0.94        | -0.37        | 0.51          | 1.71         | -0.81       | -1.00        |
| -0.74        | -1.07        | 0.14         | -0.69         | -0.52        | -0.37       | 0.74         |
| -0.23        | -0.09        | 0.41         | -0.60         | -0.69        | -0.22       | 1.18         |
| -0.26        | -0.03        | 0.32         | -0.34         | -0.98        | 0.18        | 0.10         |
| -0.83        | -0.96        | -0.40        | -0.40         | 0.73         | -0.56       | -0.87        |
| 1.81         | 3.38         | -0.36        | -0.14         | -1.18        | 3.58        | 0.81         |
| -0.77        | -0.73        | -0.29        | -0.45         | 1.84         | -0.77       | -0.96        |
| 0.29         | 0.21         | -0.13        | -0.39         | -0.43        | 0.08        | 1.51         |
| 0.61         | 0.40         | -0.19        | 0.00          | -0.92        | 1.25        | 0.48         |
| -0.49        | 0.11         | -0.27        | 0.45          | -0.33        | -0.80       | -0.06        |
| -0.06        | 0.28         | -0.37        | -0.47         | 0.27         | 0.00        | 2.70         |
| -0.43        | 0.76         | 0.07         | -0.61         | -1.30        | -0.10       | 0.35         |
| 2.88         | 2.03         | -0.29        | -0.72         | -0.85        | 1.50        | 0.67         |
| -0.40        | -0.57        | -0.19        | -0.43         | 0.68         | -0.23       | -0.08        |
| -0.67        | -0.22        | -0.36        | 0.11          | 0.36         | -0.79       | -0.21        |
| -0.40        | -0.34        | -0.37        | 0.04          | 0.67         | -0.63       | -0.38        |
| -0.62        | -0.44        | -0.39        | -0.19         | 1.76         | -0.83       | -0.75        |
| -0.47        | -0.65        | -0.33        | 0.40          | -0.82        | -0.13       | -1.54        |
| -0.20        | 0.39         | -0.30        | -0.16         | -1.30        | -0.66       | -1.00        |
| 2.60         | -0.69        | 0.20         | -1.04         | -1.47        | 1.70        | 0.18         |
| 5.46         | -0.10        | -0.05        | -1.28         | -1.05        | 7.47        | 0.35         |

|       |       |       |       |       |       |       |
|-------|-------|-------|-------|-------|-------|-------|
| -0.23 | -0.30 | -0.13 | -0.73 | -0.93 | 1.54  | 0.59  |
| -0.61 | -0.30 | 1.30  | -0.94 | 0.04  | 0.41  | 1.88  |
| -0.48 | -1.09 | 2.34  | -0.76 | 2.34  | -0.51 | -0.44 |
| 1.46  | 0.01  | 1.93  | -0.98 | -0.57 | 3.02  | 0.10  |
| 1.67  | 1.63  | -0.33 | 0.55  | -0.02 | 0.99  | -1.48 |
| -0.58 | 0.33  | -0.35 | 1.63  | 0.02  | -0.78 | -0.17 |
| -0.53 | 3.37  | -0.20 | 0.28  | 0.12  | -0.70 | -0.19 |
| -0.71 | -0.04 | -0.39 | 0.33  | -0.35 | -0.73 | 0.09  |
| -1.00 | -1.41 | -0.40 | -0.01 | 4.26  | -0.86 | -1.29 |
| -0.30 | 0.73  | -0.39 | 0.55  | -0.77 | 0.44  | 0.90  |
| 1.38  | 2.86  | -0.26 | -0.02 | -1.19 | 2.47  | 2.80  |
| -0.67 | 0.14  | -0.36 | -0.33 | -1.38 | -0.56 | -0.77 |
| -0.49 | 4.04  | -0.34 | 1.22  | 1.65  | -0.68 | -0.44 |
| -0.65 | 9.21  | -0.40 | 0.55  | 1.80  | -0.12 | 0.00  |
| -0.54 | 0.42  | -0.32 | 0.23  | -0.84 | -0.62 | -0.96 |
| 0.34  | 2.26  | -0.21 | -0.07 | -1.21 | 0.54  | 1.33  |
| -0.85 | -0.96 | -0.35 | 0.24  | -0.34 | -0.55 | -0.82 |
| -0.71 | 0.38  | -0.37 | 1.15  | 0.83  | -0.88 | -1.26 |
| -0.14 | 2.15  | -0.20 | -0.23 | -1.36 | -0.12 | -0.37 |
| -0.67 | 0.20  | -0.37 | 0.47  | -0.63 | -0.55 | -0.53 |
| -0.10 | 0.64  | -0.21 | 0.02  | 0.04  | -0.48 | 0.00  |
| -0.49 | 0.68  | -0.28 | -0.31 | -0.51 | -0.77 | -0.01 |
| 0.16  | 0.94  | -0.28 | -0.21 | -0.61 | -0.31 | 0.13  |
| -0.63 | 0.19  | -0.25 | 0.31  | -0.57 | -0.75 | -0.21 |
| -0.36 | 0.13  | -0.14 | 0.12  | 0.43  | -0.63 | -0.09 |
| -0.02 | 2.62  | -0.33 | 0.24  | -0.60 | -0.26 | 0.03  |
| -0.77 | -0.87 | -0.19 | 0.32  | 1.69  | -0.59 | -0.38 |
| -0.66 | -0.15 | -0.31 | -0.19 | 0.44  | -0.80 | -0.19 |
| -0.43 | -0.60 | -0.10 | -0.38 | -0.02 | -0.41 | 0.17  |
| 7.69  | 0.66  | -0.27 | -1.23 | -1.58 | 4.07  | 0.44  |
| -0.52 | -0.36 | -0.37 | -0.33 | -0.58 | -0.61 | -0.66 |
| 0.44  | 0.29  | -0.35 | 0.48  | -1.25 | 0.31  | -0.97 |
| 0.99  | 1.73  | -0.34 | 0.37  | -1.28 | 0.12  | -1.25 |
| 5.62  | -0.75 | -0.21 | -1.31 | -1.61 | 3.39  | 0.92  |
| -0.51 | -0.96 | -0.19 | -0.53 | -0.92 | -0.77 | -0.16 |
| -0.33 | -0.93 | -0.25 | -0.25 | -1.00 | -0.34 | -0.31 |
| 0.64  | -0.34 | -0.24 | -1.02 | -1.29 | 0.17  | 0.62  |
| 0.84  | -0.29 | -0.32 | -1.12 | 0.75  | 0.72  | 1.70  |
| 0.43  | 0.11  | 0.08  | -0.55 | -0.74 | 0.99  | 1.27  |
| -0.31 | -0.34 | 1.32  | 0.29  | -0.93 | 0.88  | -0.54 |
| 1.20  | 0.53  | -0.22 | 0.05  | 5.61  | 0.19  | -0.18 |
| 1.19  | 2.33  | -0.16 | -0.18 | 1.25  | 0.57  | -0.29 |
| -0.23 | -0.55 | -0.31 | -0.70 | 0.90  | -0.42 | 0.23  |
| -0.22 | -0.27 | -0.40 | 0.94  | -0.92 | -0.40 | 1.44  |
| -0.51 | -0.29 | -0.12 | -0.75 | -0.13 | -0.05 | 0.50  |
| 0.78  | 4.27  | -0.29 | -0.44 | -0.72 | 0.64  | 0.11  |
| -1.01 | 0.26  | -0.38 | 3.01  | 1.98  | -0.87 | -0.97 |
| 0.53  | -0.40 | -0.37 | -0.39 | 0.02  | 0.71  | 0.17  |
| -0.07 | 0.44  | 0.25  | -0.71 | -1.15 | 0.03  | -0.19 |
| -0.78 | -1.22 | 0.09  | 0.03  | -0.59 | 0.81  | -1.09 |
| 2.54  | 2.70  | 0.01  | -0.95 | -0.68 | 1.50  | 1.84  |
| -0.08 | 1.54  | 0.00  | -0.64 | -1.16 | 0.42  | 0.00  |
| -0.54 | -0.27 | 0.25  | -0.36 | -0.24 | -0.72 | -0.93 |
| -0.33 | 0.54  | -0.19 | -0.72 | -0.97 | 0.35  | -0.38 |
| -0.64 | -0.31 | -0.40 | 2.09  | 0.20  | -0.72 | -1.02 |
| 2.21  | 2.41  | -0.31 | -0.63 | -1.08 | 2.76  | 0.71  |
| 6.90  | 0.95  | -0.28 | -1.22 | -1.23 | 3.98  | 0.35  |
| -0.52 | 0.53  | -0.38 | 0.02  | -0.42 | -0.68 | -0.44 |
| -0.29 | 1.32  | -0.29 | -0.36 | -1.05 | -0.47 | -0.24 |

|       |       |       |       |       |       |       |
|-------|-------|-------|-------|-------|-------|-------|
| -0.51 | 0.13  | -0.03 | -0.56 | -0.10 | -0.63 | -0.52 |
| 0.37  | 1.14  | -0.13 | -0.64 | -0.49 | 0.66  | 2.45  |
| -0.38 | 1.19  | -0.20 | -0.36 | -0.10 | -0.62 | 0.50  |
| 2.20  | 0.11  | -0.26 | -1.24 | -0.41 | 3.61  | 1.02  |
| -0.71 | -0.67 | -0.25 | -0.50 | -0.22 | -0.62 | 0.20  |
| -0.50 | 0.23  | -0.37 | 0.04  | 0.44  | -0.72 | -0.39 |
| 0.19  | -0.64 | 0.23  | -0.91 | -1.53 | 1.54  | -0.23 |
| 0     | -1    | 0     | 0     | -1    | 0     | 0     |

---

| 68           | 69          | 70           | 71          | 72           | 73          | 74             |
|--------------|-------------|--------------|-------------|--------------|-------------|----------------|
| 4            | 3           | 7            | 6           | 1            | 76          | 61             |
| TGAGGTAGTAGG | TCTCCCAACCC | TTCAAGTAATCC | TAGCAGCACGT | TATTGCACTTGT | GAATGTTGCTC | (AGCTACATTGTC) |
| let-7a-5p    | miR-150-5p  | miR-26a-5p   | miR-16-5p   | miR-92a-3p   | miR-409-3p  | miR-221-3p     |
| 8839402      | 8994745     | 5953261      | 7939871     | 46389442     | 67182       | 106297         |
| -0.72        | -0.63       | -1.13        | -0.85       | 1.23         | 1.96        | 1.65           |
| -0.61        | -0.49       | -0.25        | 0.11        | -1.76        | -1.03       | 0.31           |
| 0.67         | -1.27       | 0.00         | 0.75        | 0.00         | -0.56       | -0.84          |
| -0.13        | -0.99       | -0.93        | -0.57       | 1.30         | -0.95       | -0.94          |
| 2.76         | 2.40        | 2.65         | 0.55        | -2.19        | -0.18       | 0.52           |
| 0.91         | -0.83       | 0.47         | -0.54       | 0.72         | 0.24        | -0.54          |
| 0.38         | 0.28        | -0.62        | -0.92       | 0.63         | 2.38        | 1.79           |
| -0.68        | 0.32        | -0.99        | -0.89       | 1.28         | 0.06        | -0.56          |
| -0.12        | -1.21       | -0.79        | -0.17       | 1.11         | -0.21       | -1.23          |
| -0.53        | -0.67       | -0.58        | -0.12       | 0.95         | -0.70       | -0.55          |
| -0.86        | -0.36       | 1.13         | 0.38        | -0.09        | -0.74       | -0.30          |
| -0.32        | 3.01        | -0.99        | -0.95       | 0.50         | -0.74       | -0.94          |
| -0.44        | -0.41       | 1.56         | 1.63        | -1.08        | -1.19       | 3.07           |
| -0.21        | 0.47        | -1.11        | -0.87       | 1.05         | 0.34        | -0.68          |
| -0.39        | -0.71       | -0.63        | 0.62        | 0.13         | -0.46       | -0.54          |
| -0.71        | 0.03        | 0.67         | 1.34        | -0.52        | 0.03        | 0.93           |
| 0.37         | 0.22        | 0.13         | -0.72       | -0.04        | -0.29       | -0.19          |
| -1.16        | 0.35        | -0.49        | 1.14        | -0.01        | 1.15        | 0.02           |
| -1.28        | -0.09       | 0.28         | 0.06        | -0.50        | -0.76       | -0.90          |
| -1.12        | -0.49       | 1.35         | 2.80        | -0.90        | -1.14       | -0.57          |
| -0.29        | -0.62       | -0.72        | -0.30       | 0.82         | -0.75       | -0.30          |
| 0.24         | 1.20        | -0.32        | -0.93       | 0.08         | 2.50        | 0.08           |
| 0.49         | 0.60        | -0.47        | -0.82       | 0.16         | 0.18        | 0.06           |
| 0.22         | 0.35        | -1.09        | -0.86       | 0.71         | -0.12       | -0.45          |
| 2.92         | -0.41       | 0.34         | -0.78       | -1.88        | 0.76        | 0.26           |
| 0.43         | 0.78        | 1.32         | -0.64       | -1.11        | 0.06        | 1.36           |
| 0.19         | -0.82       | 1.21         | 1.56        | -0.60        | 0.13        | -0.50          |
| -0.39        | -1.39       | 0.90         | 4.09        | -1.04        | -0.73       | -0.64          |
| -1.01        | -0.78       | 0.95         | -0.21       | 0.35         | 0.01        | -0.67          |
| -1.33        | -1.14       | -0.88        | -0.58       | 0.96         | -0.81       | -1.18          |
| -0.29        | -1.30       | -1.42        | -0.90       | 0.86         | 0.08        | -1.04          |
| -0.71        | -1.18       | -0.20        | -0.12       | -1.14        | 0.39        | -0.42          |
| 2.11         | -0.42       | 3.89         | 3.49        | -2.35        | -0.66       | 1.37           |
| -0.67        | -0.91       | -0.71        | -0.74       | 1.20         | -0.02       | 0.55           |
| -0.96        | -0.62       | -1.02        | -0.43       | 0.88         | -0.34       | 0.88           |
| -0.39        | 2.79        | -0.19        | -0.85       | 0.16         | -1.09       | 0.82           |
| -1.16        | -1.13       | -1.64        | -0.96       | 2.69         | -0.78       | -1.51          |
| -1.01        | 0.68        | 0.45         | -0.44       | 0.15         | 0.85        | 1.56           |
| -1.38        | -0.62       | 0.57         | 0.39        | -1.17        | -0.17       | 4.18           |

|       |       |       |       |       |       |       |
|-------|-------|-------|-------|-------|-------|-------|
| -0.65 | 2.94  | 0.75  | -0.69 | -0.53 | -0.62 | -0.23 |
| -1.87 | 0.64  | -0.21 | -0.96 | 0.64  | 0.48  | 2.33  |
| -2.05 | 1.75  | 0.12  | -1.02 | -1.46 | 2.56  | 13.01 |
| -0.61 | 0.42  | -0.25 | -0.63 | 0.61  | 0.10  | 1.12  |
| -1.31 | -0.64 | 0.63  | 0.37  | 0.02  | -0.81 | 0.00  |
| -1.60 | 1.22  | -0.83 | -0.64 | 0.61  | -0.15 | -0.76 |
| -2.14 | -0.31 | -0.51 | -0.92 | 1.17  | -0.40 | -0.23 |
| -0.89 | 0.20  | 3.42  | 1.12  | -1.08 | -0.81 | -0.19 |
| -0.25 | 0.48  | 0.48  | -0.62 | -0.05 | 0.72  | 0.68  |
| -1.33 | 0.19  | 0.12  | 0.55  | 0.21  | -1.14 | -0.15 |
| -1.09 | 2.45  | 0.64  | -0.29 | -0.15 | -0.19 | -0.54 |
| -1.29 | 1.54  | 0.60  | 0.81  | -0.52 | 0.64  | 0.79  |
| -0.01 | 0.46  | -0.04 | -0.82 | 0.27  | 3.15  | 1.99  |
| 0.61  | -1.06 | -0.56 | -0.62 | 0.95  | 2.14  | 0.82  |
| 0.11  | 0.27  | 1.23  | -0.18 | -0.39 | -0.22 | 1.13  |
| 0.00  | -0.33 | -0.46 | -0.64 | 0.87  | -0.61 | -0.32 |
| -0.02 | -0.23 | -0.32 | -0.54 | 0.59  | 1.11  | -0.34 |
| -0.27 | -0.15 | -0.11 | 0.09  | 0.52  | 4.04  | -0.15 |
| -0.71 | -0.81 | 1.57  | 3.42  | -1.52 | -1.23 | -0.98 |
| 0.23  | 1.47  | 0.56  | -0.75 | -0.77 | 1.27  | 0.08  |
| 1.34  | 0.36  | 2.77  | 0.22  | -1.80 | -0.71 | 2.72  |
| 1.35  | 1.88  | 3.06  | 0.54  | -2.04 | 2.18  | 2.01  |
| -0.76 | -1.08 | 1.56  | 4.07  | -1.24 | -0.59 | -1.28 |
| 0.26  | -0.23 | -0.32 | -0.74 | 0.73  | -0.98 | -0.74 |
| 0.75  | -0.06 | 1.20  | -0.45 | 0.30  | -0.20 | -0.42 |
| 0.97  | -0.96 | 1.23  | 0.97  | -0.59 | -1.20 | -1.11 |
| 0.04  | -1.09 | -1.35 | -0.75 | 0.21  | -0.30 | -0.76 |
| -1.79 | -1.33 | -0.74 | 2.41  | 0.01  | -0.76 | 0.10  |
| -0.94 | -0.90 | -0.60 | -0.58 | -0.84 | -0.92 | -0.41 |
| 4.47  | -0.48 | -0.40 | -0.30 | -1.38 | 1.12  | 3.52  |
| 0.92  | -0.25 | 1.01  | 0.13  | -1.06 | 1.53  | 3.03  |
| -0.46 | -0.74 | -0.65 | -0.73 | 1.33  | 0.04  | 0.21  |
| -1.79 | 5.34  | 0.38  | 4.40  | -1.59 | -0.47 | -1.21 |
| -0.10 | -0.74 | -0.20 | 0.63  | 0.61  | -0.81 | -0.72 |
| -0.47 | 1.06  | 0.25  | 0.70  | -0.35 | 0.31  | 0.42  |
| -1.94 | 2.20  | -1.54 | -1.07 | 0.15  | 1.19  | 3.88  |
| -0.35 | 0.99  | -0.20 | 0.52  | -0.16 | 1.10  | -0.54 |
| -1.02 | 0.65  | 0.27  | 0.00  | -0.60 | -0.78 | -0.99 |
| -0.40 | -0.39 | -0.27 | 0.10  | -0.32 | 1.67  | -1.31 |
| 0.12  | -0.71 | 0.87  | 1.38  | -0.87 | -0.74 | 0.51  |
| -0.62 | -0.81 | 2.86  | 2.46  | -1.20 | -1.04 | -0.38 |
| -0.23 | -0.78 | 0.71  | -0.25 | 0.04  | -1.27 | -0.86 |
| 0.00  | 0.59  | 1.99  | 0.36  | -0.75 | -0.40 | -0.25 |
| -1.32 | 3.40  | -0.11 | -0.78 | 0.11  | -0.37 | -0.95 |
| -1.33 | -0.28 | 1.73  | 2.10  | -1.40 | -0.45 | -0.03 |
| -0.83 | -1.11 | 0.68  | 4.85  | -1.59 | -0.90 | -1.29 |
| -1.58 | 1.55  | 1.24  | -0.11 | 0.10  | -1.01 | 0.03  |
| -0.69 | 1.55  | 2.17  | 0.04  | -0.64 | -0.59 | -0.08 |
| -0.53 | 1.16  | 1.26  | -0.08 | 0.04  | -1.22 | -0.44 |
| -0.86 | -0.60 | 0.38  | 1.10  | -0.33 | -0.94 | -0.52 |
| -0.65 | 1.32  | 0.78  | -0.14 | -0.22 | -0.96 | -0.15 |
| 1.62  | -1.27 | 0.17  | 0.45  | -1.06 | 0.35  | -1.14 |
| -0.66 | -0.25 | -0.80 | -0.81 | 1.05  | -0.31 | -0.89 |
| 0.91  | 0.12  | -0.43 | -0.78 | 0.04  | 1.29  | -0.26 |
| 0.57  | -1.24 | 1.11  | -0.12 | -0.64 | -0.97 | -0.49 |
| -0.84 | -0.70 | 1.04  | 0.08  | -0.22 | -0.17 | 0.47  |
| 0.29  | 0.29  | 0.31  | 0.31  | 0.32  | 0.32  | 0.33  |
| 0.18  | 0.19  | 0.18  | 0.27  | 0.15  | 0.88  | 0.23  |













































































































































































|         |         |          |         |         |         |        |
|---------|---------|----------|---------|---------|---------|--------|
| 409595  | 1862148 | 4820581  | 198165  | 2718285 | 905697  | 128375 |
| 78      | 79      | 80       | 81      | 82      | 83      | 84     |
| 9       | 10      | 11       | 12      | 13      | 14      | 15     |
| B_31    | C_4     | C_45     | D_11    | D_35    | D_5     | D_6    |
| CHR_P   | CHR_P   | CHR_P    | CHR_P   | CHR_P   | CHR_P   | CHR_P  |
| 1100319 | 5438511 | 11385676 | 1530796 | 5410445 | 2500630 | 376992 |
| 0.83    | 0.34    | 0.56     | 0.53    | 0.43    | 0.71    | 0.12   |
| B_31    | C_4     | C_45     | D_11    | D_35    | D_5     | D_6    |
| 690724  | 3576363 | 6565095  | 1332631 | 2692160 | 1594933 | 248617 |
| 57543   | 839593  | 1485363  | 66104   | 922039  | 250879  | 40263  |
| 782     | 62135   | 149104   | 2808    | 110593  | 187485  | 28011  |
| 116387  | 66190   | 519025   | 27131   | 288601  | 83289   | 6316   |
| 8068    | 137605  | 290995   | 2601    | 177243  | 39675   | 8077   |
| 12377   | 74324   | 311607   | 21738   | 157984  | 41080   | 5640   |
| 76530   | 110612  | 290912   | 76      | 148973  | 33455   | 5133   |
| 17767   | 60894   | 195271   | 1079    | 87662   | 37482   | 3941   |
| 3301    | 13437   | 142980   | 751     | 19838   | 9389    | 239    |
| 1786    | 45753   | 137089   | 680     | 116931  | 10484   | 1718   |
| 9961    | 80032   | 105854   | 790     | 50422   | 31476   | 4480   |
| 14513   | 52008   | 71950    | 4647    | 67416   | 9519    | 1574   |
| 4756    | 23945   | 89230    | 1976    | 38096   | 8959    | 1123   |
| 10040   | 31706   | 64809    | 394     | 62420   | 7016    | 608    |
| 1245    | 29523   | 91349    | 10147   | 28410   | 5598    | 1187   |
| 16498   | 20456   | 76934    | 42      | 49422   | 5698    | 1306   |
| 391     | 12155   | 36167    | 4096    | 34739   | 976     | 241    |
| 2884    | 9723    | 47570    | 42      | 23519   | 5442    | 359    |
| 1475    | 9271    | 47481    | 1230    | 22958   | 8395    | 799    |
| 2600    | 11194   | 44142    | 118     | 18192   | 5563    | 624    |
| 4618    | 6833    | 23589    | 858     | 12258   | 13575   | 2164   |
| 1685    | 9605    | 29496    | 2819    | 13803   | 6319    | 502    |
| 834     | 9464    | 27925    | 164     | 12294   | 3499    | 282    |
| 3021    | 4524    | 7791     | 39      | 10145   | 5295    | 728    |
| 673     | 2563    | 23854    | 103     | 5539    | 5107    | 230    |
| 2687    | 4476    | 44370    | 52      | 6827    | 8514    | 1096   |
| 1409    | 6167    | 16802    | 977     | 8451    | 3533    | 240    |
| 197     | 5688    | 14709    | 9351    | 15189   | 1765    | 246    |
| 4048    | 8002    | 20128    | 78      | 5939    | 5604    | 908    |
| 284     | 5632    | 14766    | 278     | 8474    | 2631    | 288    |
| 948     | 4409    | 6685     | 418     | 8789    | 2520    | 375    |
| 2002    | 5124    | 25164    | 59      | 9530    | 3332    | 292    |
| 433     | 7383    | 20268    | 385     | 8809    | 1435    | 387    |
| 1549    | 3256    | 13895    | 86      | 6943    | 1007    | 90     |
| 1700    | 1982    | 10549    | 18      | 6747    | 794     | 107    |
| 239     | 5156    | 13744    | 257     | 7733    | 2413    | 267    |
| 458     | 6282    | 13928    | 136     | 4661    | 2640    | 158    |
| 2186    | 3772    | 15343    | 153     | 5402    | 6796    | 1211   |
| 1609    | 4793    | 19198    | 132     | 3571    | 4428    | 721    |
| 167     | 2424    | 7797     | 1014    | 2545    | 4355    | 280    |
| 825     | 2996    | 7643     | 4999    | 4253    | 645     | 994    |
| 78      | 1428    | 11190    | 4456    | 2903    | 1173    | 106    |
| 471     | 2099    | 11262    | 934     | 7323    | 1439    | 395    |
| 602     | 2529    | 6823     | 1404    | 3054    | 868     | 82     |
| 1521    | 2832    | 9459     | 19      | 3067    | 1973    | 303    |
| 595     | 1373    | 9487     | 1047    | 3258    | 1950    | 124    |

|      |      |      |      |      |      |     |
|------|------|------|------|------|------|-----|
| 424  | 1740 | 6714 | 471  | 3847 | 975  | 127 |
| 186  | 1506 | 3436 | 169  | 3733 | 841  | 134 |
| 549  | 2982 | 6373 | 1287 | 4733 | 865  | 155 |
| 212  | 959  | 1740 | 4    | 1212 | 28   | 1   |
| 2941 | 539  | 9094 | 31   | 2585 | 920  | 105 |
| 14   | 728  | 3394 | 682  | 4094 | 865  | 286 |
| 172  | 1546 | 8012 | 189  | 2108 | 1343 | 79  |
| 138  | 1472 | 4898 | 2738 | 2224 | 1314 | 65  |
| 1599 | 1514 | 4602 | 26   | 2533 | 2209 | 392 |
| 88   | 651  | 1278 | 93   | 1729 | 394  | 28  |
| 382  | 207  | 1338 | 10   | 837  | 81   | 11  |
| 428  | 1397 | 4655 | 125  | 1954 | 667  | 46  |
| 157  | 936  | 5182 | 10   | 2506 | 630  | 61  |
| 202  | 1298 | 5766 | 66   | 3213 | 1208 | 137 |
| 123  | 765  | 3285 | 174  | 2007 | 507  | 89  |
| 120  | 918  | 4397 | 392  | 1512 | 344  | 33  |
| 175  | 579  | 4681 | 269  | 2088 | 1090 | 82  |
| 106  | 433  | 1690 | 9    | 767  | 178  | 46  |
| 79   | 66   | 195  | 6    | 144  | 36   | 5   |
| 438  | 1622 | 4366 | 139  | 2114 | 216  | 100 |
| 236  | 979  | 3131 | 2    | 1689 | 458  | 19  |
| 461  | 698  | 4507 | 12   | 1244 | 331  | 16  |
| 103  | 311  | 2696 | 1    | 1333 | 271  | 10  |
| 131  | 598  | 7405 | 81   | 781  | 465  | 8   |
| 29   | 1410 | 1546 | 20   | 395  | 1464 | 158 |
| 442  | 640  | 2261 | 346  | 1351 | 322  | 87  |
| 140  | 1117 | 1937 | 218  | 1738 | 245  | 57  |
| 73   | 558  | 2504 | 4    | 1489 | 291  | 74  |
| 314  | 1035 | 2168 | 35   | 1279 | 349  | 22  |
| 175  | 376  | 1387 | 27   | 1345 | 357  | 19  |
| 146  | 433  | 3090 | 170  | 2575 | 217  | 148 |
| 38   | 665  | 1039 | 206  | 1059 | 340  | 39  |
| 9    | 366  | 703  | 87   | 482  | 428  | 58  |
| 56   | 559  | 2219 | 331  | 1650 | 185  | 33  |
| 30   | 634  | 2223 | 119  | 849  | 231  | 27  |
| 28   | 1130 | 1364 | 27   | 1025 | 146  | 10  |
| 20   | 383  | 1929 | 409  | 1023 | 133  | 8   |
| 36   | 695  | 1086 | 22   | 756  | 296  | 91  |
| 69   | 163  | 712  | 1    | 1101 | 87   | 4   |
| 50   | 251  | 656  | 18   | 464  | 305  | 20  |
| 2    | 260  | 1491 | 2711 | 571  | 138  | 6   |
| 160  | 450  | 947  | 1111 | 995  | 260  | 55  |
| 149  | 486  | 2576 | 7    | 980  | 121  | 22  |
| 319  | 474  | 1826 | 2    | 1036 | 142  | 18  |
| 36   | 356  | 1112 | 38   | 1129 | 190  | 70  |
| 217  | 370  | 1293 | 74   | 581  | 157  | 54  |
| 7    | 61   | 126  | 11   | 84   | 3    | 1   |
| 26   | 361  | 1762 | 96   | 710  | 97   | 5   |
| 58   | 236  | 982  | 7    | 959  | 86   | 11  |
| 245  | 249  | 1371 | 1    | 647  | 45   | 4   |
| 262  | 322  | 2157 | 1    | 996  | 165  | 15  |
| 25   | 197  | 628  | 139  | 612  | 227  | 74  |
| 160  | 312  | 944  | 212  | 510  | 189  | 49  |
| 81   | 185  | 818  | 165  | 368  | 332  | 39  |
| 66   | 176  | 1483 | 3    | 651  | 104  | 7   |
| 6    | 125  | 584  | 526  | 170  | 224  | 1   |
| 131  | 317  | 427  | 3    | 391  | 114  | 29  |
| 34   | 288  | 921  | 275  | 827  | 125  | 40  |
| 54   | 247  | 971  | 0    | 285  | 129  | 25  |

|     |     |      |     |     |     |    |
|-----|-----|------|-----|-----|-----|----|
| 244 | 362 | 2134 | 0   | 396 | 165 | 33 |
| 17  | 173 | 973  | 3   | 430 | 109 | 8  |
| 48  | 135 | 921  | 694 | 331 | 117 | 13 |
| 61  | 165 | 676  | 9   | 235 | 206 | 17 |
| 68  | 187 | 919  | 1   | 501 | 39  | 2  |
| 26  | 179 | 1203 | 14  | 513 | 61  | 6  |
| 108 | 156 | 1025 | 6   | 450 | 256 | 21 |
| 24  | 80  | 588  | 111 | 440 | 123 | 14 |
| 32  | 85  | 978  | 413 | 192 | 183 | 4  |
| 24  | 139 | 459  | 0   | 286 | 133 | 3  |
| 20  | 137 | 753  | 20  | 598 | 144 | 2  |
| 9   | 170 | 525  | 35  | 436 | 66  | 25 |
| 38  | 83  | 424  | 4   | 508 | 102 | 4  |
| 105 | 142 | 472  | 3   | 425 | 48  | 13 |
| 105 | 142 | 472  | 3   | 425 | 48  | 13 |
| 14  | 184 | 1078 | 7   | 177 | 136 | 7  |
| 30  | 205 | 911  | 345 | 247 | 28  | 0  |
| 43  | 248 | 1072 | 4   | 336 | 87  | 8  |
| 22  | 63  | 492  | 0   | 491 | 66  | 41 |
| 59  | 87  | 391  | 8   | 241 | 219 | 17 |
| 5   | 19  | 131  | 4   | 94  | 8   | 2  |
| 23  | 173 | 453  | 28  | 275 | 32  | 7  |
| 13  | 70  | 132  | 663 | 112 | 64  | 6  |
| 36  | 121 | 518  | 30  | 157 | 53  | 16 |
| 2   | 59  | 244  | 294 | 79  | 96  | 3  |
| 3   | 63  | 307  | 45  | 220 | 69  | 8  |
| 2   | 98  | 106  | 63  | 36  | 25  | 5  |
| 115 | 106 | 657  | 27  | 328 | 79  | 21 |
| 5   | 72  | 222  | 13  | 160 | 64  | 3  |
| 16  | 81  | 230  | 128 | 129 | 25  | 4  |
| 11  | 56  | 185  | 126 | 198 | 16  | 1  |
| 2   | 89  | 335  | 30  | 271 | 96  | 8  |
| 4   | 209 | 327  | 10  | 250 | 29  | 3  |
| 6   | 83  | 331  | 45  | 355 | 35  | 2  |
| 19  | 86  | 246  | 0   | 174 | 26  | 7  |
| 14  | 93  | 759  | 107 | 120 | 36  | 2  |
| 5   | 72  | 219  | 20  | 75  | 30  | 2  |
| 19  | 128 | 359  | 19  | 156 | 30  | 3  |
| 11  | 108 | 661  | 83  | 257 | 22  | 8  |
| 22  | 41  | 198  | 1   | 127 | 37  | 3  |
| 11  | 33  | 200  | 4   | 62  | 2   | 0  |
| 40  | 193 | 453  | 51  | 145 | 22  | 7  |
| 7   | 45  | 250  | 0   | 169 | 32  | 2  |
| 37  | 51  | 286  | 0   | 130 | 44  | 6  |
| 66  | 215 | 314  | 3   | 195 | 25  | 8  |
| 2   | 50  | 168  | 109 | 87  | 35  | 1  |
| 25  | 70  | 227  | 2   | 159 | 65  | 10 |
| 18  | 81  | 269  | 3   | 152 | 29  | 0  |
| 6   | 32  | 427  | 0   | 519 | 31  | 13 |
| 1   | 39  | 226  | 13  | 71  | 19  | 0  |
| 14  | 17  | 782  | 2   | 215 | 6   | 0  |
| 21  | 99  | 180  | 74  | 81  | 19  | 3  |
| 1   | 33  | 86   | 9   | 69  | 44  | 0  |
| 7   | 33  | 226  | 50  | 84  | 19  | 1  |
| 23  | 54  | 297  | 90  | 84  | 31  | 2  |
| 3   | 89  | 85   | 103 | 182 | 16  | 4  |
| 3   | 8   | 50   | 1   | 34  | 11  | 0  |
| 8   | 33  | 241  | 95  | 74  | 42  | 1  |
| 10  | 71  | 269  | 83  | 94  | 23  | 0  |

|    |     |     |     |     |    |    |
|----|-----|-----|-----|-----|----|----|
| 16 | 32  | 421 | 1   | 134 | 39 | 0  |
| 4  | 27  | 182 | 0   | 121 | 40 | 2  |
| 17 | 97  | 210 | 65  | 195 | 12 | 2  |
| 3  | 45  | 176 | 2   | 51  | 35 | 1  |
| 5  | 33  | 280 | 265 | 27  | 33 | 13 |
| 37 | 5   | 101 | 0   | 56  | 8  | 3  |
| 16 | 217 | 254 | 11  | 176 | 12 | 2  |
| 32 | 34  | 234 | 12  | 25  | 28 | 1  |
| 3  | 111 | 153 | 3   | 160 | 21 | 1  |
| 3  | 62  | 150 | 2   | 124 | 71 | 14 |
| 7  | 61  | 271 | 2   | 134 | 61 | 6  |
| 7  | 25  | 277 | 1   | 80  | 26 | 0  |
| 5  | 45  | 76  | 186 | 138 | 19 | 1  |
| 5  | 31  | 178 | 12  | 208 | 16 | 5  |
| 38 | 44  | 219 | 2   | 116 | 36 | 8  |
| 4  | 55  | 227 | 47  | 44  | 22 | 0  |
| 19 | 33  | 236 | 19  | 181 | 19 | 6  |
| 2  | 97  | 131 | 16  | 123 | 28 | 4  |
| 8  | 45  | 186 | 0   | 100 | 19 | 5  |
| 0  | 15  | 158 | 27  | 117 | 9  | 8  |
| 12 | 61  | 225 | 0   | 98  | 24 | 3  |
| 4  | 25  | 91  | 21  | 78  | 27 | 5  |
| 5  | 56  | 172 | 107 | 91  | 7  | 4  |
| 7  | 41  | 172 | 0   | 98  | 17 | 5  |
| 22 | 25  | 228 | 2   | 204 | 11 | 5  |
| 13 | 16  | 168 | 23  | 108 | 3  | 1  |
| 4  | 33  | 169 | 5   | 55  | 18 | 2  |
| 2  | 20  | 48  | 179 | 2   | 1  | 0  |
| 17 | 29  | 359 | 0   | 90  | 16 | 0  |
| 1  | 21  | 177 | 6   | 78  | 47 | 1  |
| 12 | 24  | 100 | 4   | 113 | 21 | 11 |
| 5  | 62  | 99  | 14  | 65  | 31 | 8  |
| 4  | 16  | 29  | 13  | 44  | 13 | 2  |
| 19 | 10  | 81  | 0   | 31  | 8  | 2  |
| 11 | 95  | 171 | 4   | 80  | 21 | 1  |
| 1  | 20  | 186 | 90  | 55  | 9  | 2  |
| 14 | 63  | 119 | 18  | 53  | 34 | 1  |
| 0  | 16  | 85  | 3   | 50  | 20 | 4  |
| 10 | 13  | 301 | 1   | 113 | 49 | 6  |
| 0  | 46  | 104 | 55  | 28  | 14 | 7  |
| 5  | 28  | 49  | 32  | 61  | 36 | 1  |
| 1  | 34  | 106 | 0   | 54  | 8  | 0  |
| 2  | 15  | 123 | 22  | 144 | 3  | 1  |
| 3  | 61  | 118 | 30  | 56  | 17 | 2  |
| 29 | 35  | 142 | 0   | 62  | 31 | 3  |
| 1  | 18  | 140 | 4   | 134 | 1  | 1  |
| 3  | 54  | 204 | 21  | 35  | 5  | 1  |
| 4  | 16  | 57  | 52  | 35  | 22 | 1  |
| 8  | 30  | 138 | 2   | 74  | 21 | 5  |
| 22 | 18  | 123 | 0   | 142 | 21 | 15 |
| 1  | 53  | 124 | 63  | 73  | 17 | 3  |
| 9  | 35  | 108 | 5   | 122 | 11 | 0  |
| 28 | 32  | 84  | 26  | 47  | 30 | 13 |
| 8  | 30  | 74  | 5   | 52  | 12 | 5  |
| 4  | 25  | 138 | 5   | 73  | 15 | 1  |
| 0  | 2   | 16  | 0   | 13  | 0  | 0  |
| 0  | 41  | 68  | 0   | 51  | 4  | 0  |
| 1  | 2   | 11  | 0   | 34  | 0  | 6  |
| 5  | 61  | 116 | 22  | 58  | 9  | 0  |

|    |    |     |     |     |    |   |
|----|----|-----|-----|-----|----|---|
| 3  | 12 | 59  | 7   | 24  | 12 | 0 |
| 3  | 33 | 125 | 24  | 42  | 8  | 1 |
| 6  | 20 | 152 | 0   | 129 | 8  | 2 |
| 0  | 16 | 77  | 22  | 58  | 13 | 1 |
| 2  | 21 | 43  | 32  | 59  | 10 | 0 |
| 2  | 42 | 41  | 24  | 83  | 3  | 0 |
| 2  | 22 | 58  | 13  | 27  | 9  | 0 |
| 2  | 25 | 77  | 0   | 22  | 10 | 0 |
| 7  | 23 | 71  | 0   | 43  | 15 | 1 |
| 4  | 27 | 34  | 15  | 44  | 18 | 3 |
| 9  | 8  | 44  | 0   | 21  | 2  | 0 |
| 2  | 16 | 65  | 40  | 39  | 4  | 0 |
| 3  | 22 | 69  | 0   | 40  | 2  | 1 |
| 5  | 22 | 49  | 97  | 29  | 7  | 1 |
| 2  | 4  | 35  | 102 | 24  | 11 | 1 |
| 1  | 4  | 54  | 0   | 12  | 13 | 1 |
| 27 | 9  | 117 | 1   | 43  | 14 | 1 |
| 4  | 22 | 89  | 3   | 24  | 1  | 1 |
| 2  | 21 | 140 | 1   | 82  | 8  | 2 |
| 4  | 23 | 36  | 5   | 31  | 1  | 0 |
| 2  | 20 | 71  | 0   | 24  | 8  | 0 |
| 4  | 2  | 45  | 0   | 22  | 15 | 1 |
| 4  | 2  | 45  | 0   | 22  | 15 | 1 |
| 0  | 6  | 74  | 3   | 69  | 5  | 2 |
| 0  | 18 | 70  | 26  | 31  | 8  | 0 |
| 2  | 10 | 38  | 11  | 20  | 10 | 0 |
| 6  | 14 | 94  | 2   | 115 | 4  | 1 |
| 5  | 16 | 98  | 0   | 25  | 9  | 0 |
| 3  | 11 | 78  | 3   | 36  | 6  | 1 |
| 6  | 14 | 36  | 3   | 23  | 4  | 1 |
| 0  | 75 | 106 | 1   | 56  | 0  | 1 |
| 0  | 11 | 32  | 78  | 12  | 2  | 0 |
| 10 | 11 | 102 | 0   | 23  | 11 | 5 |
| 0  | 21 | 13  | 5   | 10  | 8  | 0 |
| 5  | 5  | 63  | 2   | 39  | 0  | 0 |
| 0  | 19 | 56  | 0   | 17  | 7  | 0 |
| 2  | 4  | 11  | 2   | 9   | 0  | 0 |
| 2  | 23 | 113 | 5   | 15  | 8  | 1 |
| 6  | 22 | 36  | 0   | 24  | 12 | 1 |
| 1  | 12 | 32  | 11  | 36  | 8  | 1 |
| 1  | 35 | 48  | 18  | 41  | 3  | 2 |
| 5  | 20 | 34  | 0   | 23  | 11 | 1 |
| 0  | 14 | 32  | 4   | 49  | 8  | 2 |
| 0  | 8  | 31  | 23  | 41  | 2  | 0 |
| 5  | 16 | 68  | 1   | 52  | 4  | 0 |
| 1  | 14 | 77  | 14  | 32  | 4  | 0 |
| 0  | 0  | 0   | 0   | 2   | 1  | 0 |
| 1  | 2  | 25  | 73  | 23  | 5  | 1 |
| 2  | 24 | 48  | 16  | 22  | 5  | 0 |
| 0  | 8  | 27  | 32  | 29  | 5  | 0 |
| 1  | 11 | 112 | 1   | 49  | 0  | 0 |
| 2  | 13 | 24  | 0   | 15  | 7  | 6 |
| 0  | 1  | 32  | 0   | 11  | 0  | 0 |
| 1  | 3  | 40  | 3   | 11  | 10 | 0 |
| 0  | 14 | 91  | 0   | 31  | 5  | 1 |
| 1  | 14 | 46  | 0   | 0   | 0  | 0 |
| 0  | 19 | 30  | 12  | 22  | 1  | 2 |
| 1  | 30 | 83  | 2   | 36  | 1  | 1 |
| 1  | 6  | 24  | 20  | 7   | 7  | 0 |

|    |    |     |    |    |    |   |
|----|----|-----|----|----|----|---|
| 0  | 3  | 55  | 5  | 27 | 2  | 1 |
| 0  | 22 | 52  | 4  | 29 | 5  | 1 |
| 8  | 11 | 46  | 1  | 63 | 3  | 2 |
| 0  | 13 | 29  | 20 | 21 | 2  | 0 |
| 0  | 6  | 31  | 14 | 24 | 3  | 0 |
| 1  | 19 | 22  | 4  | 20 | 8  | 1 |
| 0  | 11 | 81  | 0  | 28 | 4  | 1 |
| 1  | 10 | 145 | 1  | 51 | 0  | 2 |
| 2  | 19 | 76  | 0  | 2  | 4  | 0 |
| 13 | 4  | 24  | 0  | 28 | 2  | 0 |
| 2  | 5  | 10  | 1  | 20 | 25 | 0 |
| 0  | 4  | 20  | 17 | 14 | 1  | 0 |
| 2  | 8  | 33  | 0  | 20 | 8  | 1 |
| 5  | 1  | 71  | 3  | 69 | 0  | 0 |
| 3  | 10 | 33  | 9  | 41 | 4  | 5 |
| 6  | 12 | 75  | 0  | 20 | 3  | 0 |
| 2  | 12 | 39  | 2  | 12 | 7  | 3 |
| 1  | 9  | 28  | 10 | 25 | 2  | 0 |
| 3  | 5  | 31  | 46 | 6  | 3  | 0 |
| 18 | 5  | 242 | 0  | 76 | 2  | 3 |
| 0  | 2  | 41  | 2  | 49 | 1  | 3 |
| 0  | 6  | 28  | 1  | 14 | 5  | 0 |
| 0  | 8  | 22  | 33 | 22 | 2  | 0 |
| 3  | 13 | 40  | 18 | 52 | 3  | 2 |
| 6  | 11 | 48  | 1  | 19 | 7  | 3 |
| 2  | 12 | 48  | 5  | 9  | 2  | 0 |
| 4  | 7  | 39  | 17 | 24 | 1  | 0 |
| 0  | 5  | 28  | 33 | 17 | 5  | 1 |
| 0  | 5  | 35  | 26 | 9  | 2  | 0 |
| 9  | 15 | 37  | 0  | 27 | 7  | 0 |
| 0  | 9  | 27  | 5  | 13 | 5  | 2 |
| 3  | 1  | 18  | 0  | 15 | 2  | 0 |
| 1  | 6  | 13  | 0  | 14 | 6  | 0 |
| 13 | 18 | 37  | 1  | 22 | 5  | 0 |
| 6  | 19 | 31  | 0  | 15 | 5  | 2 |
| 0  | 10 | 53  | 17 | 13 | 4  | 0 |
| 2  | 7  | 25  | 0  | 9  | 5  | 0 |
| 0  | 5  | 48  | 15 | 12 | 7  | 0 |
| 14 | 4  | 21  | 1  | 19 | 2  | 0 |
| 0  | 8  | 32  | 6  | 18 | 1  | 0 |
| 1  | 8  | 16  | 0  | 12 | 2  | 0 |
| 4  | 12 | 17  | 2  | 18 | 5  | 0 |
| 0  | 2  | 21  | 2  | 23 | 0  | 0 |
| 0  | 6  | 16  | 3  | 17 | 3  | 0 |
| 0  | 6  | 37  | 1  | 19 | 2  | 0 |
| 2  | 7  | 49  | 13 | 28 | 0  | 0 |
| 0  | 6  | 15  | 5  | 9  | 1  | 0 |
| 1  | 9  | 34  | 0  | 8  | 3  | 0 |
| 0  | 8  | 42  | 19 | 5  | 2  | 2 |
| 0  | 2  | 32  | 1  | 24 | 9  | 0 |
| 1  | 7  | 26  | 9  | 5  | 2  | 0 |
| 1  | 0  | 4   | 1  | 5  | 2  | 0 |
| 5  | 7  | 9   | 10 | 14 | 2  | 0 |
| 3  | 2  | 15  | 0  | 15 | 2  | 1 |
| 1  | 11 | 17  | 2  | 15 | 3  | 0 |
| 1  | 10 | 27  | 0  | 9  | 1  | 0 |
| 3  | 4  | 20  | 2  | 13 | 1  | 1 |
| 0  | 5  | 4   | 0  | 2  | 1  | 0 |
| 0  | 8  | 17  | 2  | 19 | 3  | 0 |



|   |    |    |    |    |   |   |
|---|----|----|----|----|---|---|
| 4 | 13 | 14 | 0  | 11 | 1 | 0 |
| 4 | 5  | 31 | 2  | 14 | 2 | 0 |
| 0 | 15 | 14 | 3  | 5  | 3 | 0 |
| 1 | 8  | 33 | 1  | 17 | 3 | 1 |
| 1 | 7  | 10 | 6  | 2  | 5 | 2 |
| 1 | 1  | 15 | 1  | 11 | 3 | 0 |
| 1 | 4  | 37 | 7  | 14 | 2 | 0 |
| 2 | 4  | 10 | 0  | 24 | 3 | 0 |
| 0 | 12 | 23 | 0  | 8  | 2 | 0 |
| 2 | 6  | 20 | 1  | 15 | 4 | 1 |
| 2 | 7  | 28 | 14 | 5  | 4 | 0 |
| 0 | 10 | 38 | 0  | 5  | 0 | 1 |
| 1 | 7  | 23 | 0  | 11 | 3 | 0 |
| 1 | 0  | 7  | 0  | 6  | 1 | 0 |
| 2 | 5  | 20 | 2  | 9  | 0 | 0 |
| 0 | 4  | 36 | 3  | 10 | 2 | 0 |
| 0 | 3  | 40 | 0  | 19 | 2 | 0 |
| 0 | 0  | 12 | 5  | 10 | 0 | 0 |
| 1 | 0  | 19 | 0  | 4  | 1 | 0 |
| 0 | 5  | 12 | 4  | 5  | 2 | 0 |
| 0 | 2  | 12 | 0  | 10 | 9 | 0 |
| 0 | 2  | 17 | 3  | 4  | 8 | 0 |
| 1 | 3  | 8  | 1  | 10 | 1 | 0 |
| 2 | 6  | 21 | 1  | 13 | 0 | 1 |
| 0 | 5  | 9  | 11 | 8  | 7 | 1 |
| 1 | 6  | 12 | 4  | 9  | 2 | 0 |
| 3 | 4  | 58 | 0  | 9  | 0 | 0 |
| 0 | 3  | 17 | 0  | 5  | 1 | 0 |
| 0 | 2  | 15 | 5  | 10 | 4 | 0 |
| 0 | 5  | 9  | 0  | 6  | 4 | 1 |
| 1 | 6  | 16 | 1  | 2  | 1 | 0 |
| 1 | 2  | 21 | 0  | 4  | 5 | 0 |
| 0 | 1  | 12 | 1  | 6  | 0 | 0 |
| 1 | 4  | 10 | 2  | 21 | 1 | 0 |
| 5 | 1  | 14 | 0  | 6  | 2 | 0 |
| 1 | 2  | 15 | 0  | 7  | 0 | 0 |
| 0 | 1  | 14 | 1  | 8  | 9 | 0 |
| 0 | 2  | 5  | 10 | 10 | 0 | 0 |
| 0 | 2  | 12 | 4  | 9  | 0 | 0 |
| 1 | 2  | 6  | 0  | 8  | 2 | 1 |
| 1 | 1  | 8  | 2  | 4  | 2 | 3 |
| 0 | 0  | 11 | 2  | 23 | 3 | 0 |
| 1 | 3  | 11 | 0  | 14 | 2 | 0 |
| 0 | 8  | 9  | 1  | 12 | 0 | 0 |
| 1 | 2  | 10 | 7  | 2  | 3 | 0 |
| 0 | 3  | 28 | 1  | 3  | 6 | 0 |
| 0 | 4  | 13 | 3  | 8  | 0 | 0 |
| 1 | 1  | 16 | 7  | 8  | 0 | 0 |
| 1 | 5  | 31 | 0  | 5  | 1 | 0 |
| 0 | 0  | 1  | 0  | 2  | 0 | 0 |
| 1 | 2  | 11 | 8  | 8  | 0 | 0 |
| 0 | 1  | 23 | 1  | 17 | 0 | 0 |
| 5 | 0  | 10 | 0  | 6  | 1 | 0 |
| 0 | 0  | 8  | 15 | 1  | 3 | 0 |
| 2 | 4  | 13 | 0  | 9  | 2 | 0 |
| 2 | 4  | 7  | 0  | 3  | 2 | 0 |
| 0 | 3  | 7  | 3  | 7  | 4 | 0 |
| 0 | 4  | 10 | 2  | 6  | 3 | 0 |
| 0 | 0  | 8  | 4  | 5  | 1 | 0 |

|   |    |    |    |    |   |   |
|---|----|----|----|----|---|---|
| 1 | 12 | 17 | 0  | 12 | 1 | 0 |
| 0 | 5  | 10 | 1  | 8  | 0 | 0 |
| 2 | 3  | 3  | 0  | 8  | 4 | 0 |
| 3 | 2  | 11 | 0  | 5  | 0 | 0 |
| 1 | 3  | 3  | 5  | 6  | 1 | 1 |
| 0 | 0  | 5  | 5  | 6  | 2 | 0 |
| 0 | 3  | 16 | 3  | 9  | 1 | 1 |
| 1 | 0  | 11 | 0  | 8  | 0 | 0 |
| 1 | 2  | 4  | 1  | 6  | 0 | 0 |
| 1 | 4  | 8  | 0  | 4  | 1 | 0 |
| 5 | 1  | 4  | 0  | 11 | 1 | 0 |
| 0 | 0  | 3  | 0  | 1  | 0 | 0 |
| 0 | 0  | 0  | 0  | 0  | 0 | 0 |
| 1 | 1  | 12 | 0  | 5  | 1 | 0 |
| 0 | 4  | 9  | 23 | 3  | 2 | 0 |
| 0 | 3  | 8  | 5  | 2  | 0 | 0 |
| 2 | 5  | 7  | 7  | 3  | 1 | 0 |
| 0 | 2  | 4  | 0  | 7  | 0 | 0 |
| 1 | 0  | 2  | 0  | 0  | 0 | 0 |
| 0 | 2  | 26 | 0  | 8  | 2 | 0 |
| 0 | 3  | 11 | 1  | 11 | 1 | 0 |
| 0 | 1  | 13 | 0  | 1  | 1 | 0 |
| 0 | 1  | 5  | 1  | 9  | 1 | 0 |
| 0 | 3  | 11 | 2  | 7  | 0 | 0 |
| 0 | 4  | 7  | 4  | 8  | 1 | 1 |
| 2 | 0  | 6  | 0  | 2  | 0 | 0 |
| 0 | 1  | 8  | 0  | 4  | 0 | 0 |
| 2 | 1  | 20 | 0  | 6  | 0 | 0 |
| 0 | 3  | 8  | 1  | 5  | 1 | 0 |
| 0 | 0  | 11 | 0  | 3  | 2 | 0 |
| 2 | 0  | 4  | 0  | 2  | 0 | 0 |
| 1 | 0  | 8  | 0  | 5  | 2 | 0 |
| 0 | 4  | 4  | 1  | 5  | 3 | 0 |
| 0 | 1  | 6  | 2  | 9  | 0 | 0 |
| 1 | 5  | 8  | 0  | 3  | 1 | 0 |
| 0 | 1  | 5  | 1  | 3  | 1 | 0 |
| 0 | 2  | 6  | 5  | 3  | 0 | 0 |
| 0 | 6  | 6  | 2  | 9  | 0 | 0 |
| 0 | 0  | 12 | 0  | 2  | 2 | 0 |
| 1 | 0  | 19 | 0  | 19 | 2 | 1 |
| 0 | 0  | 3  | 0  | 7  | 0 | 0 |
| 2 | 2  | 7  | 0  | 6  | 1 | 0 |
| 0 | 2  | 4  | 0  | 7  | 3 | 0 |
| 0 | 3  | 4  | 0  | 7  | 1 | 0 |
| 0 | 2  | 9  | 1  | 5  | 0 | 0 |
| 0 | 2  | 10 | 0  | 2  | 0 | 0 |
| 0 | 7  | 2  | 0  | 1  | 2 | 0 |
| 0 | 1  | 7  | 5  | 2  | 3 | 0 |
| 0 | 2  | 3  | 2  | 0  | 0 | 0 |
| 0 | 2  | 10 | 2  | 5  | 0 | 0 |
| 0 | 1  | 8  | 0  | 4  | 3 | 0 |
| 0 | 8  | 6  | 0  | 6  | 0 | 0 |
| 0 | 0  | 18 | 5  | 2  | 0 | 2 |
| 0 | 3  | 9  | 0  | 3  | 1 | 1 |
| 0 | 0  | 5  | 0  | 3  | 2 | 0 |
| 0 | 2  | 6  | 0  | 0  | 0 | 0 |
| 0 | 2  | 6  | 2  | 4  | 2 | 0 |
| 0 | 1  | 4  | 3  | 7  | 1 | 0 |
| 0 | 0  | 4  | 2  | 1  | 0 | 0 |

|   |   |    |   |    |   |   |
|---|---|----|---|----|---|---|
| 1 | 0 | 9  | 0 | 1  | 0 | 0 |
| 0 | 2 | 8  | 0 | 2  | 0 | 0 |
| 0 | 1 | 2  | 0 | 4  | 1 | 1 |
| 0 | 2 | 8  | 2 | 1  | 0 | 0 |
| 0 | 0 | 3  | 0 | 2  | 0 | 0 |
| 0 | 3 | 10 | 0 | 6  | 0 | 0 |
| 1 | 1 | 4  | 3 | 3  | 0 | 0 |
| 0 | 0 | 3  | 0 | 0  | 0 | 0 |
| 0 | 1 | 3  | 0 | 3  | 1 | 0 |
| 0 | 1 | 19 | 0 | 5  | 1 | 0 |
| 0 | 6 | 9  | 1 | 14 | 0 | 1 |
| 1 | 1 | 15 | 1 | 1  | 1 | 0 |
| 1 | 1 | 5  | 0 | 6  | 0 | 0 |
| 0 | 2 | 0  | 8 | 3  | 0 | 0 |
| 0 | 2 | 7  | 0 | 7  | 0 | 0 |
| 0 | 4 | 5  | 0 | 2  | 3 | 1 |
| 0 | 0 | 2  | 0 | 1  | 0 | 0 |
| 0 | 0 | 2  | 0 | 2  | 0 | 0 |
| 0 | 3 | 1  | 0 | 2  | 0 | 0 |
| 0 | 4 | 7  | 1 | 0  | 2 | 0 |
| 0 | 0 | 10 | 0 | 2  | 0 | 0 |
| 1 | 1 | 3  | 0 | 2  | 1 | 0 |
| 3 | 2 | 4  | 0 | 2  | 1 | 0 |
| 0 | 1 | 7  | 3 | 4  | 1 | 1 |
| 1 | 1 | 2  | 2 | 3  | 1 | 0 |
| 0 | 1 | 12 | 0 | 6  | 1 | 0 |
| 2 | 0 | 2  | 3 | 3  | 1 | 1 |
| 0 | 1 | 2  | 3 | 3  | 1 | 0 |
| 0 | 0 | 1  | 0 | 0  | 0 | 0 |
| 0 | 3 | 2  | 0 | 0  | 1 | 0 |
| 0 | 1 | 15 | 0 | 7  | 2 | 0 |
| 0 | 1 | 4  | 1 | 0  | 0 | 0 |
| 0 | 4 | 8  | 0 | 3  | 0 | 0 |
| 0 | 0 | 1  | 2 | 2  | 0 | 0 |
| 0 | 1 | 10 | 1 | 2  | 1 | 0 |
| 0 | 1 | 7  | 1 | 0  | 0 | 0 |
| 0 | 2 | 3  | 6 | 2  | 0 | 0 |
| 1 | 0 | 7  | 0 | 3  | 1 | 0 |
| 0 | 3 | 4  | 1 | 0  | 1 | 0 |
| 0 | 0 | 4  | 6 | 1  | 0 | 0 |
| 3 | 2 | 7  | 0 | 4  | 1 | 0 |
| 0 | 0 | 6  | 3 | 0  | 0 | 1 |
| 0 | 1 | 2  | 0 | 3  | 0 | 0 |
| 0 | 1 | 1  | 0 | 2  | 0 | 0 |
| 0 | 1 | 2  | 0 | 3  | 1 | 0 |
| 0 | 4 | 5  | 0 | 2  | 0 | 0 |
| 1 | 0 | 1  | 0 | 1  | 0 | 0 |
| 0 | 4 | 6  | 0 | 3  | 2 | 0 |
| 0 | 0 | 5  | 1 | 5  | 1 | 0 |
| 0 | 0 | 6  | 0 | 3  | 1 | 0 |
| 0 | 1 | 3  | 1 | 3  | 0 | 0 |
| 0 | 0 | 15 | 0 | 2  | 1 | 0 |
| 0 | 0 | 12 | 0 | 1  | 0 | 0 |
| 1 | 0 | 0  | 0 | 1  | 0 | 0 |
| 3 | 3 | 7  | 1 | 3  | 0 | 0 |
| 3 | 3 | 7  | 0 | 5  | 2 | 0 |
| 0 | 0 | 0  | 0 | 2  | 0 | 0 |
| 0 | 1 | 1  | 1 | 1  | 0 | 0 |
| 0 | 2 | 2  | 0 | 1  | 0 | 0 |

|        |         |         |         |         |         |        |
|--------|---------|---------|---------|---------|---------|--------|
| 1      | 1       | 5       | 0       | 1       | 0       | 0      |
| 1      | 0       | 4       | 2       | 2       | 0       | 0      |
| 0      | 0       | 1       | 0       | 2       | 0       | 2      |
| 0      | 0       | 1       | 1       | 5       | 1       | 0      |
| 0      | 0       | 0       | 0       | 3       | 0       | 0      |
| 0      | 0       | 6       | 0       | 3       | 0       | 0      |
| 1      | 0       | 2       | 4       | 0       | 1       | 0      |
| 0      | 1       | 1       | 8       | 2       | 0       | 0      |
| 0      | 0       | 1       | 0       | 2       | 0       | 0      |
| 0      | 0       | 0       | 0       | 9       | 0       | 0      |
| 0      | 1       | 2       | 0       | 1       | 0       | 0      |
| 0      | 5       | 2       | 1       | 3       | 0       | 0      |
| 0      | 0       | 0       | 6       | 0       | 0       | 0      |
| B_31   | C_4     | C_45    | D_11    | D_35    | D_5     | D_6    |
| CHR_P  | CHR_P   | CHR_P   | CHR_P   | CHR_P   | CHR_P   | CHR_P  |
| 690724 | 3576363 | 6565095 | 1332631 | 2692160 | 1594933 | 248617 |
| 20     | 21      | 19      | 28      | 16      | 20      | 21     |
| -0.28  | -0.12   | -0.60   | 1.32    | -1.13   | -0.22   | -0.08  |



|        |         |         |         |         |        |         |
|--------|---------|---------|---------|---------|--------|---------|
| 0.18   | 0.09    | 0.04    | 0.53    | 0.35    | 0.75   | 0.63    |
| 21     | 24      | 28      | 10      | 15      | 7      | 9       |
| 1      | 1       | 1       | 1       | 1       | 1      | 1       |
| 78     | 79      | 80      | 81      | 82      | 83     | 84      |
| 13     | 14      | 15      | 16      | 17      | 18     | 19      |
| D_6    | E_19    | E_21    | E_22    | E_23    | E_3    | E_46    |
| CHR_P  | CHR_P   | CHR_P   | CHR_P   | CHR_P   | CHR_P  | CHR_P   |
| 128375 | 4686947 | 1336672 | 1032612 | 1495548 | 331698 | 1653485 |
| D_6    | E_19    | E_21    | E_22    | E_23    | E_3    | E_46    |
| 40263  | 1091684 | 255189  | 377862  | 379984  | 124977 | 258293  |
| 28011  | 502157  | 213241  | 199130  | 172634  | 19968  | 62806   |
| 6316   | 164902  | 42264   | 34304   | 133004  | 68294  | 83643   |
| 8077   | 363634  | 74226   | 71113   | 112232  | 11484  | 53131   |
| 5640   | 168227  | 60585   | 62714   | 91720   | 29872  | 116972  |
| 5133   | 384358  | 159415  | 29437   | 72873   | 3409   | 169046  |
| 3941   | 241542  | 120763  | 51665   | 110884  | 11308  | 108609  |
| 239    | 170486  | 19447   | 3984    | 11486   | 855    | 206272  |
| 1718   | 160818  | 59440   | 15638   | 37107   | 4040   | 72117   |
| 4480   | 146719  | 27738   | 16747   | 34871   | 1335   | 30042   |
| 1574   | 83057   | 11529   | 5049    | 21295   | 2197   | 21733   |
| 1123   | 78420   | 23046   | 18190   | 18821   | 6539   | 29913   |
| 608    | 67728   | 14380   | 3469    | 31235   | 1127   | 21234   |
| 1187   | 47756   | 9645    | 16109   | 15141   | 2620   | 11470   |
| 1306   | 49746   | 11428   | 1692    | 13245   | 723    | 32632   |
| 241    | 15960   | 7283    | 7002    | 9764    | 7497   | 11053   |
| 359    | 68639   | 12706   | 1450    | 14569   | 432    | 21244   |
| 799    | 68787   | 9163    | 4133    | 9311    | 1693   | 17088   |
| 624    | 42508   | 12757   | 4006    | 9113    | 1012   | 15857   |

|      |       |       |      |       |      |       |
|------|-------|-------|------|-------|------|-------|
| 2164 | 22498 | 10337 | 5460 | 11379 | 1634 | 10414 |
| 502  | 37407 | 8453  | 3170 | 8471  | 1321 | 11161 |
| 282  | 37223 | 4087  | 3436 | 5650  | 671  | 5481  |
| 728  | 26441 | 6142  | 2757 | 6541  | 768  | 9153  |
| 230  | 43123 | 13258 | 2801 | 8605  | 361  | 15787 |
| 1096 | 41338 | 8570  | 1361 | 7492  | 350  | 19954 |
| 240  | 35378 | 5537  | 4177 | 5771  | 1090 | 7670  |
| 246  | 13570 | 2631  | 4416 | 4918  | 1441 | 4771  |
| 908  | 12615 | 4758  | 2076 | 2971  | 210  | 8490  |
| 288  | 28349 | 8096  | 4620 | 8607  | 1001 | 6149  |
| 375  | 21739 | 5854  | 4227 | 7817  | 878  | 2975  |
| 292  | 24465 | 8071  | 2430 | 5991  | 2016 | 9244  |
| 387  | 13614 | 3701  | 3365 | 5191  | 787  | 3153  |
| 90   | 22482 | 4396  | 1462 | 3296  | 542  | 16316 |
| 107  | 9431  | 1539  | 315  | 1303  | 187  | 21344 |
| 267  | 26556 | 7663  | 4366 | 8052  | 962  | 5712  |
| 158  | 17481 | 3592  | 5270 | 4749  | 375  | 2813  |
| 1211 | 20296 | 4581  | 2089 | 2878  | 410  | 4251  |
| 721  | 19821 | 8938  | 1413 | 7464  | 263  | 2794  |
| 280  | 9234  | 1750  | 4360 | 5035  | 303  | 2132  |
| 994  | 2083  | 1343  | 1343 | 1802  | 1161 | 1533  |
| 106  | 6288  | 2100  | 2021 | 2809  | 461  | 2590  |
| 395  | 8362  | 1914  | 1295 | 2664  | 966  | 3483  |
| 82   | 15094 | 3308  | 3782 | 3872  | 735  | 2936  |
| 303  | 7445  | 1250  | 307  | 1006  | 77   | 8899  |
| 124  | 12184 | 3381  | 2185 | 4911  | 922  | 7026  |
| 127  | 8964  | 2412  | 1302 | 3118  | 517  | 2193  |
| 134  | 10643 | 3997  | 1868 | 2942  | 373  | 2509  |
| 155  | 2285  | 887   | 1727 | 1377  | 1089 | 2514  |
| 1    | 3209  | 249   | 142  | 737   | 55   | 7014  |
| 105  | 3186  | 1092  | 221  | 537   | 337  | 9277  |
| 286  | 6693  | 940   | 226  | 3241  | 320  | 843   |
| 79   | 9428  | 2710  | 646  | 2436  | 221  | 3106  |
| 65   | 5262  | 1015  | 1432 | 1345  | 139  | 1216  |
| 392  | 3803  | 1802  | 434  | 1409  | 98   | 1507  |
| 28   | 10682 | 2089  | 583  | 406   | 260  | 2310  |
| 11   | 1912  | 105   | 56   | 159   | 42   | 8704  |
| 46   | 6295  | 2142  | 1567 | 1409  | 163  | 1180  |
| 61   | 7356  | 2196  | 1203 | 1553  | 392  | 2756  |
| 137  | 4687  | 1156  | 368  | 1965  | 310  | 1606  |
| 89   | 1394  | 1149  | 1634 | 1572  | 472  | 712   |
| 33   | 4365  | 807   | 446  | 987   | 131  | 1164  |
| 82   | 4609  | 1215  | 630  | 910   | 301  | 2118  |
| 46   | 2675  | 394   | 128  | 238   | 12   | 2919  |
| 5    | 1293  | 226   | 118  | 235   | 27   | 6738  |
| 100  | 832   | 225   | 565  | 622   | 220  | 332   |
| 19   | 6500  | 838   | 323  | 732   | 83   | 1197  |
| 16   | 4792  | 595   | 134  | 572   | 206  | 3920  |
| 10   | 5083  | 392   | 158  | 326   | 41   | 1577  |
| 8    | 5139  | 1069  | 333  | 801   | 103  | 1631  |
| 158  | 4768  | 1358  | 1688 | 855   | 25   | 450   |
| 87   | 1148  | 508   | 530  | 523   | 528  | 610   |
| 57   | 1909  | 353   | 577  | 485   | 231  | 456   |
| 74   | 3695  | 594   | 77   | 635   | 25   | 1907  |
| 22   | 3930  | 566   | 218  | 505   | 63   | 929   |
| 19   | 4700  | 1642  | 406  | 1573  | 107  | 1008  |
| 148  | 1158  | 185   | 57   | 566   | 131  | 563   |
| 39   | 3160  | 1065  | 650  | 596   | 139  | 735   |
| 58   | 1282  | 676   | 901  | 513   | 93   | 1403  |

|    |      |      |     |     |     |      |
|----|------|------|-----|-----|-----|------|
| 33 | 936  | 263  | 315 | 385 | 279 | 374  |
| 27 | 3055 | 613  | 391 | 500 | 116 | 987  |
| 10 | 3718 | 680  | 546 | 745 | 76  | 665  |
| 8  | 1928 | 367  | 453 | 524 | 241 | 428  |
| 91 | 1251 | 391  | 610 | 539 | 141 | 204  |
| 4  | 1104 | 241  | 54  | 164 | 162 | 2150 |
| 20 | 6239 | 1194 | 447 | 866 | 40  | 965  |
| 6  | 3066 | 404  | 328 | 350 | 90  | 715  |
| 55 | 818  | 275  | 419 | 448 | 245 | 261  |
| 22 | 1568 | 529  | 74  | 245 | 27  | 1080 |
| 18 | 1279 | 438  | 117 | 537 | 77  | 618  |
| 70 | 608  | 424  | 321 | 389 | 75  | 209  |
| 54 | 1204 | 375  | 173 | 445 | 83  | 460  |
| 1  | 460  | 25   | 16  | 54  | 6   | 1799 |
| 5  | 1169 | 347  | 303 | 654 | 106 | 437  |
| 11 | 2372 | 686  | 176 | 341 | 68  | 450  |
| 4  | 1641 | 240  | 69  | 207 | 20  | 892  |
| 15 | 649  | 453  | 68  | 278 | 85  | 668  |
| 74 | 364  | 206  | 198 | 274 | 104 | 151  |
| 49 | 518  | 141  | 188 | 202 | 121 | 229  |
| 39 | 534  | 162  | 201 | 292 | 122 | 296  |
| 7  | 916  | 152  | 23  | 88  | 11  | 540  |
| 1  | 2445 | 174  | 178 | 181 | 7   | 259  |
| 29 | 931  | 611  | 323 | 496 | 72  | 318  |
| 40 | 394  | 130  | 87  | 294 | 127 | 309  |
| 25 | 1789 | 440  | 152 | 296 | 19  | 395  |
| 33 | 876  | 229  | 97  | 144 | 30  | 436  |
| 8  | 1251 | 126  | 35  | 98  | 9   | 733  |
| 13 | 726  | 176  | 126 | 218 | 88  | 274  |
| 17 | 1460 | 525  | 192 | 478 | 47  | 341  |
| 2  | 1264 | 154  | 58  | 124 | 34  | 596  |
| 6  | 1129 | 126  | 75  | 120 | 20  | 559  |
| 21 | 1499 | 285  | 70  | 249 | 28  | 595  |
| 14 | 601  | 168  | 131 | 213 | 59  | 251  |
| 4  | 425  | 102  | 50  | 110 | 49  | 203  |
| 3  | 1745 | 130  | 107 | 133 | 14  | 235  |
| 2  | 620  | 114  | 124 | 160 | 60  | 427  |
| 25 | 579  | 108  | 85  | 134 | 17  | 188  |
| 4  | 625  | 250  | 230 | 96  | 41  | 200  |
| 13 | 666  | 197  | 26  | 185 | 25  | 341  |
| 13 | 666  | 197  | 26  | 185 | 25  | 341  |
| 7  | 853  | 134  | 88  | 111 | 14  | 309  |
| 0  | 569  | 99   | 137 | 140 | 53  | 191  |
| 8  | 387  | 62   | 72  | 129 | 65  | 114  |
| 41 | 936  | 99   | 10  | 188 | 25  | 313  |
| 17 | 441  | 169  | 68  | 116 | 33  | 316  |
| 2  | 137  | 21   | 5   | 28  | 6   | 913  |
| 7  | 171  | 93   | 84  | 115 | 52  | 117  |
| 6  | 605  | 140  | 171 | 228 | 23  | 133  |
| 16 | 310  | 87   | 50  | 143 | 49  | 121  |
| 3  | 585  | 158  | 248 | 147 | 18  | 61   |
| 8  | 385  | 71   | 148 | 84  | 7   | 31   |
| 5  | 309  | 86   | 91  | 70  | 11  | 466  |
| 21 | 245  | 92   | 31  | 127 | 46  | 174  |
| 3  | 757  | 261  | 84  | 127 | 18  | 127  |
| 4  | 522  | 124  | 139 | 128 | 15  | 118  |
| 1  | 885  | 101  | 30  | 85  | 14  | 171  |
| 8  | 481  | 126  | 60  | 116 | 23  | 129  |
| 3  | 627  | 96   | 70  | 142 | 7   | 143  |

|    |     |     |     |     |     |     |
|----|-----|-----|-----|-----|-----|-----|
| 2  | 653 | 58  | 68  | 54  | 22  | 195 |
| 7  | 635 | 128 | 59  | 131 | 12  | 140 |
| 2  | 318 | 99  | 57  | 112 | 20  | 106 |
| 2  | 353 | 141 | 100 | 94  | 28  | 135 |
| 3  | 370 | 103 | 102 | 119 | 27  | 128 |
| 8  | 81  | 31  | 21  | 39  | 46  | 66  |
| 3  | 318 | 130 | 66  | 99  | 24  | 122 |
| 0  | 130 | 8   | 5   | 21  | 1   | 319 |
| 7  | 221 | 26  | 60  | 59  | 25  | 37  |
| 2  | 115 | 50  | 49  | 74  | 42  | 87  |
| 6  | 341 | 216 | 38  | 133 | 29  | 161 |
| 8  | 97  | 60  | 46  | 55  | 24  | 37  |
| 1  | 422 | 68  | 60  | 91  | 18  | 91  |
| 10 | 241 | 95  | 29  | 81  | 3   | 309 |
| 0  | 456 | 38  | 28  | 42  | 11  | 135 |
| 13 | 324 | 39  | 2   | 59  | 13  | 379 |
| 0  | 127 | 66  | 68  | 105 | 31  | 55  |
| 0  | 97  | 14  | 13  | 42  | 38  | 269 |
| 3  | 255 | 35  | 84  | 66  | 16  | 26  |
| 0  | 594 | 82  | 85  | 70  | 2   | 36  |
| 1  | 239 | 35  | 52  | 29  | 5   | 85  |
| 2  | 273 | 40  | 20  | 67  | 6   | 84  |
| 4  | 151 | 36  | 42  | 80  | 8   | 54  |
| 0  | 71  | 10  | 4   | 8   | 0   | 373 |
| 1  | 209 | 61  | 39  | 62  | 16  | 79  |
| 0  | 193 | 39  | 68  | 77  | 18  | 47  |
| 0  | 209 | 41  | 8   | 46  | 3   | 139 |
| 2  | 419 | 108 | 31  | 94  | 5   | 108 |
| 2  | 83  | 34  | 50  | 53  | 35  | 46  |
| 1  | 415 | 59  | 69  | 93  | 11  | 53  |
| 13 | 31  | 10  | 12  | 10  | 25  | 266 |
| 3  | 178 | 47  | 12  | 37  | 5   | 307 |
| 2  | 275 | 47  | 40  | 44  | 6   | 34  |
| 1  | 159 | 85  | 68  | 34  | 12  | 60  |
| 1  | 139 | 30  | 22  | 27  | 13  | 72  |
| 14 | 59  | 48  | 43  | 65  | 19  | 31  |
| 6  | 143 | 91  | 33  | 49  | 8   | 89  |
| 0  | 140 | 77  | 5   | 46  | 7   | 180 |
| 1  | 151 | 46  | 23  | 72  | 8   | 50  |
| 5  | 224 | 10  | 9   | 74  | 12  | 55  |
| 8  | 309 | 94  | 21  | 57  | 11  | 108 |
| 0  | 611 | 40  | 77  | 45  | 4   | 114 |
| 6  | 111 | 15  | 7   | 57  | 22  | 65  |
| 4  | 179 | 25  | 0   | 60  | 19  | 49  |
| 5  | 221 | 59  | 12  | 50  | 4   | 135 |
| 8  | 118 | 10  | 0   | 75  | 7   | 43  |
| 3  | 165 | 63  | 10  | 39  | 6   | 120 |
| 5  | 205 | 27  | 36  | 42  | 15  | 27  |
| 4  | 83  | 24  | 30  | 48  | 22  | 44  |
| 5  | 208 | 53  | 12  | 50  | 4   | 130 |
| 5  | 156 | 18  | 3   | 53  | 9   | 46  |
| 1  | 153 | 34  | 13  | 34  | 33  | 88  |
| 2  | 231 | 63  | 28  | 38  | 5   | 88  |
| 0  | 20  | 0   | 0   | 12  | 103 | 16  |
| 0  | 207 | 43  | 3   | 18  | 1   | 133 |
| 1  | 322 | 49  | 15  | 45  | 4   | 67  |
| 11 | 29  | 15  | 29  | 40  | 39  | 21  |
| 8  | 124 | 17  | 23  | 26  | 4   | 16  |
| 2  | 131 | 39  | 38  | 39  | 9   | 137 |

|    |     |    |    |    |    |     |
|----|-----|----|----|----|----|-----|
| 2  | 107 | 11 | 7  | 10 | 3  | 382 |
| 1  | 124 | 25 | 25 | 20 | 8  | 45  |
| 2  | 268 | 30 | 14 | 33 | 4  | 60  |
| 1  | 39  | 21 | 17 | 40 | 2  | 38  |
| 4  | 114 | 66 | 70 | 64 | 4  | 19  |
| 6  | 63  | 93 | 17 | 24 | 9  | 31  |
| 7  | 93  | 22 | 31 | 51 | 2  | 17  |
| 1  | 144 | 17 | 25 | 53 | 6  | 13  |
| 0  | 314 | 16 | 11 | 22 | 2  | 114 |
| 1  | 94  | 19 | 0  | 57 | 10 | 31  |
| 2  | 83  | 31 | 43 | 34 | 12 | 26  |
| 3  | 116 | 37 | 16 | 36 | 9  | 35  |
| 1  | 136 | 17 | 23 | 50 | 19 | 7   |
| 1  | 88  | 8  | 26 | 28 | 9  | 40  |
| 1  | 91  | 37 | 41 | 40 | 5  | 26  |
| 5  | 91  | 66 | 34 | 19 | 10 | 34  |
| 15 | 173 | 26 | 0  | 50 | 3  | 185 |
| 3  | 102 | 17 | 25 | 17 | 5  | 16  |
| 0  | 95  | 15 | 4  | 11 | 21 | 55  |
| 13 | 49  | 47 | 20 | 29 | 11 | 29  |
| 5  | 149 | 61 | 27 | 44 | 4  | 26  |
| 1  | 100 | 33 | 12 | 38 | 2  | 62  |
| 0  | 45  | 3  | 0  | 2  | 2  | 64  |
| 0  | 282 | 27 | 16 | 36 | 2  | 22  |
| 6  | 28  | 45 | 18 | 11 | 4  | 83  |
| 0  | 90  | 8  | 21 | 29 | 8  | 17  |
| 0  | 168 | 46 | 30 | 27 | 10 | 57  |
| 1  | 96  | 7  | 19 | 10 | 4  | 38  |
| 2  | 45  | 11 | 0  | 37 | 5  | 33  |
| 1  | 49  | 7  | 15 | 33 | 7  | 35  |
| 0  | 46  | 9  | 9  | 25 | 10 | 17  |
| 0  | 39  | 6  | 22 | 11 | 19 | 27  |
| 0  | 70  | 26 | 25 | 21 | 3  | 16  |
| 0  | 191 | 26 | 29 | 29 | 4  | 24  |
| 1  | 121 | 20 | 7  | 15 | 2  | 47  |
| 3  | 90  | 13 | 31 | 24 | 10 | 15  |
| 0  | 66  | 11 | 3  | 11 | 0  | 53  |
| 0  | 46  | 17 | 10 | 18 | 7  | 14  |
| 1  | 121 | 23 | 9  | 16 | 8  | 23  |
| 1  | 78  | 16 | 28 | 28 | 2  | 20  |
| 1  | 126 | 6  | 21 | 27 | 7  | 68  |
| 1  | 89  | 10 | 4  | 28 | 1  | 73  |
| 1  | 64  | 35 | 6  | 16 | 4  | 30  |
| 1  | 44  | 17 | 10 | 21 | 6  | 29  |
| 2  | 77  | 7  | 1  | 22 | 2  | 25  |
| 0  | 237 | 33 | 16 | 17 | 3  | 31  |
| 0  | 112 | 29 | 4  | 16 | 0  | 48  |
| 1  | 173 | 57 | 26 | 17 | 4  | 26  |
| 1  | 173 | 57 | 26 | 17 | 4  | 26  |
| 2  | 47  | 8  | 0  | 24 | 6  | 11  |
| 0  | 33  | 9  | 11 | 11 | 2  | 6   |
| 0  | 94  | 15 | 16 | 20 | 5  | 42  |
| 1  | 68  | 13 | 2  | 41 | 6  | 42  |
| 0  | 82  | 29 | 11 | 48 | 6  | 40  |
| 1  | 47  | 14 | 12 | 23 | 7  | 12  |
| 1  | 125 | 10 | 3  | 20 | 4  | 25  |
| 1  | 52  | 15 | 19 | 15 | 2  | 1   |
| 0  | 54  | 19 | 10 | 27 | 2  | 26  |
| 5  | 30  | 34 | 4  | 11 | 3  | 20  |



|   |     |    |    |    |    |     |
|---|-----|----|----|----|----|-----|
| 0 | 18  | 8  | 17 | 3  | 0  | 10  |
| 0 | 74  | 12 | 4  | 6  | 7  | 70  |
| 0 | 135 | 21 | 22 | 24 | 3  | 18  |
| 0 | 20  | 0  | 0  | 2  | 0  | 68  |
| 1 | 102 | 15 | 9  | 21 | 6  | 12  |
| 1 | 85  | 31 | 2  | 35 | 1  | 12  |
| 1 | 31  | 7  | 15 | 20 | 6  | 11  |
| 2 | 29  | 13 | 7  | 20 | 5  | 10  |
| 1 | 81  | 30 | 2  | 34 | 1  | 11  |
| 2 | 23  | 11 | 9  | 10 | 5  | 6   |
| 0 | 73  | 26 | 28 | 11 | 1  | 8   |
| 0 | 82  | 8  | 5  | 9  | 5  | 23  |
| 0 | 51  | 14 | 9  | 15 | 4  | 13  |
| 0 | 5   | 0  | 2  | 0  | 0  | 100 |
| 1 | 17  | 5  | 10 | 20 | 3  | 12  |
| 0 | 44  | 8  | 10 | 11 | 5  | 6   |
| 0 | 34  | 3  | 6  | 18 | 4  | 16  |
| 0 | 20  | 2  | 3  | 20 | 5  | 15  |
| 6 | 33  | 9  | 11 | 12 | 1  | 16  |
| 0 | 18  | 0  | 0  | 2  | 0  | 53  |
| 0 | 151 | 14 | 14 | 21 | 2  | 11  |
| 1 | 52  | 11 | 0  | 16 | 0  | 18  |
| 0 | 0   | 0  | 0  | 0  | 0  | 0   |
| 2 | 34  | 7  | 4  | 11 | 2  | 6   |
| 1 | 21  | 11 | 9  | 18 | 8  | 10  |
| 0 | 65  | 11 | 9  | 12 | 0  | 6   |
| 1 | 34  | 2  | 1  | 11 | 1  | 6   |
| 1 | 34  | 14 | 3  | 18 | 3  | 21  |
| 2 | 22  | 6  | 2  | 15 | 4  | 14  |
| 0 | 36  | 8  | 12 | 10 | 1  | 11  |
| 0 | 27  | 13 | 22 | 15 | 4  | 10  |
| 1 | 15  | 20 | 6  | 13 | 5  | 10  |
| 1 | 44  | 11 | 0  | 16 | 0  | 14  |
| 2 | 28  | 5  | 1  | 16 | 5  | 16  |
| 0 | 40  | 7  | 1  | 3  | 0  | 31  |
| 0 | 21  | 11 | 1  | 10 | 2  | 39  |
| 0 | 75  | 19 | 9  | 14 | 0  | 37  |
| 0 | 49  | 2  | 10 | 13 | 4  | 11  |
| 1 | 40  | 14 | 6  | 11 | 0  | 28  |
| 0 | 7   | 1  | 4  | 5  | 10 | 21  |
| 5 | 22  | 3  | 3  | 11 | 9  | 14  |
| 0 | 22  | 8  | 1  | 6  | 0  | 32  |
| 3 | 16  | 8  | 9  | 8  | 0  | 3   |
| 0 | 49  | 5  | 3  | 7  | 2  | 26  |
| 0 | 38  | 6  | 11 | 6  | 1  | 20  |
| 3 | 19  | 4  | 0  | 8  | 6  | 32  |
| 3 | 14  | 3  | 2  | 13 | 0  | 8   |
| 0 | 36  | 9  | 11 | 26 | 0  | 9   |
| 0 | 20  | 6  | 3  | 19 | 7  | 7   |
| 2 | 34  | 4  | 9  | 2  | 0  | 6   |
| 3 | 29  | 8  | 2  | 16 | 1  | 17  |
| 0 | 13  | 7  | 8  | 6  | 1  | 17  |
| 0 | 7   | 5  | 4  | 8  | 7  | 5   |
| 1 | 25  | 5  | 6  | 13 | 1  | 7   |
| 0 | 21  | 8  | 12 | 8  | 0  | 5   |
| 0 | 36  | 15 | 5  | 13 | 4  | 6   |
| 2 | 25  | 4  | 4  | 6  | 3  | 11  |
| 0 | 26  | 3  | 2  | 3  | 0  | 54  |
| 0 | 66  | 21 | 1  | 9  | 0  | 26  |

|   |    |    |    |    |    |    |
|---|----|----|----|----|----|----|
| 0 | 24 | 2  | 4  | 2  | 0  | 9  |
| 2 | 32 | 9  | 6  | 15 | 0  | 5  |
| 0 | 21 | 5  | 6  | 3  | 8  | 6  |
| 0 | 54 | 7  | 4  | 10 | 0  | 7  |
| 0 | 22 | 4  | 7  | 7  | 10 | 12 |
| 0 | 27 | 10 | 3  | 17 | 3  | 22 |
| 0 | 10 | 6  | 6  | 9  | 1  | 9  |
| 0 | 41 | 10 | 0  | 7  | 0  | 19 |
| 0 | 24 | 10 | 4  | 5  | 2  | 8  |
| 0 | 36 | 4  | 1  | 9  | 3  | 7  |
| 0 | 16 | 4  | 7  | 5  | 4  | 8  |
| 0 | 31 | 4  | 0  | 17 | 0  | 10 |
| 0 | 20 | 0  | 6  | 2  | 8  | 42 |
| 0 | 13 | 5  | 14 | 11 | 0  | 10 |
| 0 | 35 | 7  | 3  | 6  | 0  | 12 |
| 2 | 18 | 2  | 9  | 6  | 0  | 8  |
| 0 | 14 | 5  | 5  | 9  | 2  | 2  |
| 0 | 27 | 5  | 12 | 5  | 2  | 5  |
| 0 | 30 | 0  | 0  | 1  | 2  | 44 |
| 0 | 13 | 5  | 1  | 3  | 1  | 12 |
| 1 | 43 | 13 | 1  | 6  | 0  | 18 |
| 0 | 24 | 6  | 8  | 6  | 2  | 3  |
| 0 | 37 | 6  | 1  | 7  | 2  | 5  |
| 1 | 1  | 2  | 3  | 10 | 1  | 4  |
| 0 | 11 | 0  | 0  | 1  | 0  | 41 |
| 0 | 20 | 1  | 2  | 4  | 0  | 5  |
| 0 | 18 | 8  | 9  | 12 | 1  | 7  |
| 0 | 4  | 3  | 4  | 12 | 4  | 7  |
| 0 | 29 | 4  | 3  | 8  | 1  | 6  |
| 1 | 16 | 6  | 11 | 6  | 6  | 3  |
| 2 | 5  | 6  | 6  | 9  | 3  | 8  |
| 0 | 9  | 1  | 5  | 10 | 1  | 7  |
| 0 | 27 | 4  | 2  | 2  | 2  | 1  |
| 0 | 13 | 2  | 1  | 1  | 0  | 34 |
| 0 | 33 | 9  | 0  | 9  | 0  | 3  |
| 1 | 23 | 8  | 3  | 8  | 0  | 10 |
| 0 | 16 | 4  | 5  | 3  | 2  | 2  |
| 1 | 18 | 8  | 3  | 8  | 1  | 9  |
| 0 | 15 | 3  | 4  | 11 | 0  | 1  |
| 0 | 14 | 0  | 2  | 1  | 1  | 66 |
| 0 | 26 | 15 | 12 | 0  | 2  | 6  |
| 0 | 42 | 4  | 1  | 2  | 0  | 10 |
| 0 | 20 | 3  | 2  | 5  | 0  | 15 |
| 0 | 14 | 3  | 3  | 7  | 0  | 5  |
| 0 | 29 | 3  | 2  | 6  | 0  | 19 |
| 0 | 36 | 2  | 5  | 4  | 1  | 4  |
| 0 | 29 | 4  | 1  | 5  | 1  | 12 |
| 0 | 8  | 7  | 3  | 3  | 1  | 4  |
| 0 | 27 | 6  | 3  | 9  | 0  | 9  |
| 1 | 7  | 4  | 3  | 7  | 1  | 1  |
| 1 | 26 | 3  | 4  | 7  | 0  | 2  |
| 0 | 24 | 1  | 3  | 5  | 2  | 4  |
| 0 | 15 | 0  | 0  | 3  | 1  | 19 |
| 0 | 10 | 3  | 0  | 5  | 1  | 16 |
| 0 | 7  | 2  | 2  | 5  | 1  | 1  |
| 1 | 30 | 9  | 2  | 5  | 2  | 5  |
| 0 | 7  | 1  | 1  | 10 | 0  | 4  |
| 0 | 9  | 3  | 0  | 4  | 1  | 4  |
| 0 | 20 | 2  | 0  | 13 | 0  | 13 |

|   |    |    |   |    |   |    |
|---|----|----|---|----|---|----|
| 0 | 4  | 1  | 1 | 5  | 0 | 5  |
| 0 | 3  | 3  | 1 | 2  | 0 | 30 |
| 0 | 8  | 0  | 1 | 6  | 2 | 2  |
| 0 | 22 | 0  | 3 | 3  | 2 | 7  |
| 0 | 5  | 0  | 5 | 4  | 1 | 6  |
| 0 | 9  | 0  | 1 | 5  | 1 | 5  |
| 1 | 3  | 4  | 2 | 8  | 1 | 3  |
| 3 | 1  | 4  | 0 | 2  | 1 | 4  |
| 0 | 14 | 1  | 1 | 10 | 3 | 6  |
| 0 | 14 | 3  | 1 | 6  | 2 | 3  |
| 0 | 22 | 3  | 2 | 0  | 0 | 3  |
| 0 | 9  | 0  | 0 | 2  | 1 | 5  |
| 0 | 20 | 1  | 2 | 0  | 0 | 2  |
| 0 | 21 | 4  | 3 | 6  | 0 | 5  |
| 0 | 4  | 2  | 0 | 5  | 0 | 2  |
| 0 | 8  | 4  | 0 | 2  | 4 | 10 |
| 0 | 68 | 0  | 3 | 2  | 0 | 0  |
| 0 | 7  | 2  | 4 | 2  | 1 | 2  |
| 0 | 14 | 1  | 0 | 6  | 0 | 4  |
| 0 | 14 | 4  | 0 | 4  | 0 | 10 |
| 0 | 13 | 2  | 4 | 1  | 0 | 4  |
| 0 | 12 | 5  | 2 | 3  | 1 | 10 |
| 0 | 6  | 1  | 0 | 1  | 0 | 9  |
| 0 | 19 | 4  | 1 | 1  | 1 | 12 |
| 0 | 5  | 4  | 2 | 2  | 0 | 3  |
| 0 | 6  | 6  | 5 | 2  | 2 | 5  |
| 0 | 15 | 0  | 0 | 1  | 1 | 0  |
| 0 | 11 | 5  | 3 | 5  | 0 | 12 |
| 0 | 17 | 10 | 2 | 4  | 1 | 7  |
| 0 | 18 | 4  | 0 | 1  | 0 | 14 |
| 1 | 7  | 5  | 3 | 4  | 0 | 3  |
| 0 | 16 | 2  | 2 | 2  | 0 | 1  |
| 1 | 6  | 1  | 0 | 1  | 0 | 2  |
| 0 | 4  | 2  | 4 | 6  | 0 | 7  |
| 0 | 11 | 3  | 7 | 6  | 1 | 1  |
| 0 | 5  | 0  | 1 | 4  | 0 | 5  |
| 0 | 5  | 10 | 0 | 3  | 0 | 8  |
| 0 | 1  | 0  | 0 | 0  | 0 | 19 |
| 0 | 0  | 0  | 0 | 1  | 0 | 27 |
| 0 | 19 | 2  | 0 | 3  | 1 | 16 |
| 0 | 6  | 1  | 2 | 4  | 1 | 5  |
| 0 | 2  | 4  | 1 | 4  | 1 | 2  |
| 0 | 5  | 0  | 2 | 4  | 2 | 1  |
| 0 | 8  | 1  | 0 | 1  | 3 | 1  |
| 0 | 1  | 2  | 1 | 0  | 0 | 23 |
| 0 | 14 | 0  | 0 | 7  | 0 | 16 |
| 0 | 12 | 0  | 0 | 5  | 0 | 5  |
| 0 | 10 | 1  | 2 | 4  | 0 | 10 |
| 0 | 1  | 3  | 1 | 4  | 1 | 3  |
| 0 | 7  | 2  | 1 | 3  | 1 | 2  |
| 1 | 6  | 0  | 0 | 2  | 0 | 6  |
| 0 | 5  | 0  | 2 | 0  | 0 | 27 |
| 0 | 9  | 3  | 1 | 2  | 3 | 6  |
| 0 | 4  | 2  | 1 | 1  | 0 | 4  |
| 0 | 9  | 1  | 4 | 3  | 0 | 2  |
| 0 | 8  | 9  | 2 | 2  | 1 | 6  |
| 0 | 0  | 1  | 0 | 2  | 1 | 23 |
| 0 | 3  | 2  | 2 | 3  | 0 | 1  |
| 0 | 7  | 0  | 2 | 1  | 0 | 2  |

|   |    |   |   |   |   |    |
|---|----|---|---|---|---|----|
| 0 | 0  | 4 | 2 | 0 | 1 | 2  |
| 0 | 3  | 1 | 2 | 5 | 0 | 4  |
| 0 | 4  | 2 | 0 | 2 | 0 | 2  |
| 0 | 4  | 1 | 1 | 7 | 3 | 2  |
| 0 | 7  | 2 | 0 | 1 | 1 | 2  |
| 0 | 7  | 2 | 3 | 3 | 1 | 6  |
| 1 | 9  | 1 | 0 | 4 | 2 | 1  |
| 0 | 7  | 0 | 1 | 2 | 0 | 42 |
| 0 | 16 | 2 | 0 | 1 | 0 | 1  |
| 0 | 4  | 0 | 0 | 3 | 0 | 0  |
| 0 | 11 | 0 | 1 | 1 | 0 | 4  |
| 0 | 4  | 0 | 1 | 1 | 0 | 0  |
| 0 | 9  | 1 | 0 | 4 | 0 | 7  |
| 0 | 4  | 5 | 0 | 3 | 0 | 9  |
| 0 | 7  | 2 | 9 | 2 | 1 | 1  |
| 0 | 1  | 3 | 1 | 3 | 0 | 2  |
| 0 | 8  | 5 | 4 | 7 | 0 | 2  |
| 0 | 8  | 1 | 0 | 2 | 0 | 1  |
| 0 | 3  | 4 | 0 | 6 | 1 | 5  |
| 2 | 3  | 2 | 5 | 0 | 0 | 1  |
| 1 | 8  | 0 | 0 | 4 | 1 | 3  |
| 0 | 11 | 4 | 2 | 2 | 1 | 2  |
| 0 | 11 | 3 | 1 | 2 | 0 | 1  |
| 0 | 13 | 2 | 2 | 5 | 0 | 5  |
| 0 | 5  | 1 | 2 | 2 | 0 | 0  |
| 0 | 6  | 2 | 1 | 0 | 0 | 0  |
| 0 | 5  | 1 | 0 | 1 | 0 | 3  |
| 0 | 6  | 2 | 1 | 3 | 0 | 2  |
| 1 | 5  | 5 | 2 | 2 | 0 | 3  |
| 0 | 7  | 2 | 2 | 1 | 0 | 1  |
| 0 | 5  | 3 | 2 | 2 | 0 | 0  |
| 0 | 2  | 0 | 0 | 0 | 0 | 9  |
| 0 | 5  | 2 | 0 | 2 | 0 | 4  |
| 0 | 10 | 3 | 0 | 1 | 0 | 7  |
| 0 | 5  | 1 | 3 | 1 | 0 | 1  |
| 0 | 9  | 0 | 0 | 2 | 0 | 8  |
| 1 | 2  | 4 | 0 | 0 | 2 | 0  |
| 0 | 7  | 0 | 0 | 0 | 1 | 2  |
| 0 | 1  | 1 | 0 | 1 | 0 | 2  |
| 0 | 12 | 0 | 1 | 1 | 0 | 5  |
| 0 | 4  | 0 | 0 | 0 | 0 | 2  |
| 1 | 9  | 5 | 1 | 2 | 0 | 3  |
| 0 | 3  | 1 | 2 | 1 | 0 | 0  |
| 0 | 3  | 1 | 0 | 1 | 0 | 9  |
| 0 | 4  | 0 | 0 | 0 | 0 | 10 |
| 0 | 13 | 1 | 0 | 6 | 0 | 2  |
| 0 | 13 | 3 | 2 | 2 | 0 | 5  |
| 0 | 1  | 1 | 0 | 0 | 0 | 6  |
| 0 | 6  | 1 | 0 | 1 | 0 | 6  |
| 1 | 0  | 1 | 2 | 1 | 2 | 1  |
| 0 | 0  | 0 | 2 | 2 | 0 | 2  |
| 0 | 3  | 1 | 3 | 0 | 0 | 3  |
| 1 | 2  | 0 | 0 | 1 | 1 | 0  |
| 0 | 3  | 0 | 3 | 3 | 0 | 4  |
| 0 | 1  | 0 | 0 | 0 | 0 | 27 |
| 0 | 13 | 0 | 2 | 0 | 0 | 2  |
| 0 | 11 | 1 | 0 | 4 | 0 | 2  |
| 0 | 3  | 0 | 2 | 0 | 0 | 2  |
| 0 | 5  | 3 | 0 | 3 | 0 | 1  |

|   |    |   |   |   |   |   |
|---|----|---|---|---|---|---|
| 0 | 4  | 1 | 1 | 0 | 0 | 2 |
| 0 | 11 | 0 | 2 | 1 | 0 | 4 |
| 0 | 8  | 1 | 0 | 3 | 0 | 0 |
| 0 | 3  | 1 | 1 | 1 | 0 | 2 |
| 0 | 9  | 0 | 0 | 2 | 1 | 4 |
| 0 | 7  | 4 | 5 | 1 | 0 | 3 |
| 0 | 5  | 0 | 2 | 2 | 0 | 0 |
| 0 | 7  | 0 | 0 | 0 | 0 | 3 |
| 1 | 3  | 0 | 0 | 3 | 0 | 1 |
| 0 | 1  | 0 | 0 | 3 | 1 | 3 |
| 0 | 2  | 1 | 3 | 2 | 0 | 1 |
| 0 | 3  | 0 | 2 | 1 | 0 | 1 |
| 0 | 2  | 0 | 0 | 1 | 0 | 2 |
| 0 | 2  | 4 | 0 | 0 | 0 | 1 |
| 0 | 3  | 0 | 1 | 0 | 0 | 1 |
| 0 | 8  | 1 | 1 | 0 | 0 | 2 |
| 0 | 3  | 0 | 3 | 1 | 0 | 1 |
| 0 | 3  | 0 | 0 | 1 | 0 | 2 |
| 0 | 0  | 0 | 0 | 0 | 0 | 8 |
| 0 | 8  | 1 | 0 | 0 | 0 | 6 |
| 0 | 2  | 5 | 1 | 4 | 0 | 1 |
| 0 | 3  | 1 | 0 | 1 | 0 | 2 |
| 0 | 4  | 1 | 1 | 1 | 2 | 1 |
| 0 | 2  | 1 | 0 | 1 | 1 | 0 |
| 0 | 4  | 1 | 2 | 1 | 0 | 1 |
| 0 | 1  | 0 | 0 | 0 | 0 | 2 |
| 0 | 3  | 1 | 1 | 3 | 0 | 0 |
| 0 | 4  | 0 | 1 | 0 | 0 | 4 |
| 2 | 5  | 3 | 0 | 1 | 0 | 5 |
| 0 | 15 | 5 | 1 | 1 | 0 | 1 |
| 0 | 8  | 1 | 1 | 1 | 0 | 5 |
| 0 | 0  | 0 | 0 | 0 | 0 | 0 |
| 0 | 1  | 0 | 1 | 1 | 1 | 1 |
| 0 | 2  | 0 | 2 | 0 | 0 | 0 |
| 0 | 2  | 1 | 0 | 1 | 0 | 1 |
| 0 | 1  | 1 | 0 | 0 | 1 | 0 |
| 0 | 4  | 1 | 0 | 0 | 1 | 1 |
| 0 | 4  | 0 | 0 | 0 | 0 | 0 |

|      |      |      |      |      |      |      |
|------|------|------|------|------|------|------|
| 0.18 | 0.09 | 0.04 | 0.53 | 0.35 | 0.75 | 0.63 |
| 21   | 24   | 28   | 10   | 15   | 7    | 9    |
| 1    | 1    | 1    | 1    | 1    | 1    | 1    |

|        |         |         |         |         |        |         |
|--------|---------|---------|---------|---------|--------|---------|
| 78     | 79      | 80      | 81      | 82      | 83     | 84      |
| 13     | 14      | 15      | 16      | 17      | 18     | 19      |
| D_6    | E_19    | E_21    | E_22    | E_23    | E_3    | E_46    |
| CHR_P  | CHR_P   | CHR_P   | CHR_P   | CHR_P   | CHR_P  | CHR_P   |
| 128375 | 4686947 | 1336672 | 1032612 | 1495548 | 331698 | 1653485 |
| CHR_P  | CHR_P   | CHR_P   | CHR_P   | CHR_P   | CHR_P  | CHR_P   |
| 40263  | 1091684 | 255189  | 377862  | 379984  | 124977 | 258293  |
| 28011  | 502157  | 213241  | 199130  | 172634  | 19968  | 62806   |
| 6316   | 164902  | 42264   | 34304   | 133004  | 68294  | 83643   |
| 8077   | 363634  | 74226   | 71113   | 112232  | 11484  | 53131   |
| 5640   | 168227  | 60585   | 62714   | 91720   | 29872  | 116972  |

|      |        |        |       |        |       |        |
|------|--------|--------|-------|--------|-------|--------|
| 5133 | 384358 | 159415 | 29437 | 72873  | 3409  | 169046 |
| 3941 | 241542 | 120763 | 51665 | 110884 | 11308 | 108609 |
| 239  | 170486 | 19447  | 3984  | 11486  | 855   | 206272 |
| 1718 | 160818 | 59440  | 15638 | 37107  | 4040  | 72117  |
| 4480 | 146719 | 27738  | 16747 | 34871  | 1335  | 30042  |
| 1574 | 83057  | 11529  | 5049  | 21295  | 2197  | 21733  |
| 1123 | 78420  | 23046  | 18190 | 18821  | 6539  | 29913  |
| 608  | 67728  | 14380  | 3469  | 31235  | 1127  | 21234  |
| 1187 | 47756  | 9645   | 16109 | 15141  | 2620  | 11470  |
| 1306 | 49746  | 11428  | 1692  | 13245  | 723   | 32632  |
| 241  | 15960  | 7283   | 7002  | 9764   | 7497  | 11053  |
| 359  | 68639  | 12706  | 1450  | 14569  | 432   | 21244  |
| 799  | 68787  | 9163   | 4133  | 9311   | 1693  | 17088  |
| 624  | 42508  | 12757  | 4006  | 9113   | 1012  | 15857  |
| 2164 | 22498  | 10337  | 5460  | 11379  | 1634  | 10414  |
| 502  | 37407  | 8453   | 3170  | 8471   | 1321  | 11161  |
| 282  | 37223  | 4087   | 3436  | 5650   | 671   | 5481   |
| 728  | 26441  | 6142   | 2757  | 6541   | 768   | 9153   |
| 230  | 43123  | 13258  | 2801  | 8605   | 361   | 15787  |
| 1096 | 41338  | 8570   | 1361  | 7492   | 350   | 19954  |
| 240  | 35378  | 5537   | 4177  | 5771   | 1090  | 7670   |
| 246  | 13570  | 2631   | 4416  | 4918   | 1441  | 4771   |
| 908  | 12615  | 4758   | 2076  | 2971   | 210   | 8490   |
| 288  | 28349  | 8096   | 4620  | 8607   | 1001  | 6149   |
| 375  | 21739  | 5854   | 4227  | 7817   | 878   | 2975   |
| 292  | 24465  | 8071   | 2430  | 5991   | 2016  | 9244   |
| 387  | 13614  | 3701   | 3365  | 5191   | 787   | 3153   |
| 90   | 22482  | 4396   | 1462  | 3296   | 542   | 16316  |
| 107  | 9431   | 1539   | 315   | 1303   | 187   | 21344  |
| 267  | 26556  | 7663   | 4366  | 8052   | 962   | 5712   |
| 158  | 17481  | 3592   | 5270  | 4749   | 375   | 2813   |
| 1211 | 20296  | 4581   | 2089  | 2878   | 410   | 4251   |
| 721  | 19821  | 8938   | 1413  | 7464   | 263   | 2794   |
| 280  | 9234   | 1750   | 4360  | 5035   | 303   | 2132   |
| 994  | 2083   | 1343   | 1343  | 1802   | 1161  | 1533   |
| 106  | 6288   | 2100   | 2021  | 2809   | 461   | 2590   |
| 395  | 8362   | 1914   | 1295  | 2664   | 966   | 3483   |
| 82   | 15094  | 3308   | 3782  | 3872   | 735   | 2936   |
| 303  | 7445   | 1250   | 307   | 1006   | 77    | 8899   |
| 124  | 12184  | 3381   | 2185  | 4911   | 922   | 7026   |
| 127  | 8964   | 2412   | 1302  | 3118   | 517   | 2193   |
| 134  | 10643  | 3997   | 1868  | 2942   | 373   | 2509   |
| 155  | 2285   | 887    | 1727  | 1377   | 1089  | 2514   |
| 1    | 3209   | 249    | 142   | 737    | 55    | 7014   |
| 105  | 3186   | 1092   | 221   | 537    | 337   | 9277   |
| 286  | 6693   | 940    | 226   | 3241   | 320   | 843    |
| 79   | 9428   | 2710   | 646   | 2436   | 221   | 3106   |
| 65   | 5262   | 1015   | 1432  | 1345   | 139   | 1216   |
| 392  | 3803   | 1802   | 434   | 1409   | 98    | 1507   |
| 28   | 10682  | 2089   | 583   | 406    | 260   | 2310   |
| 11   | 1912   | 105    | 56    | 159    | 42    | 8704   |
| 46   | 6295   | 2142   | 1567  | 1409   | 163   | 1180   |
| 61   | 7356   | 2196   | 1203  | 1553   | 392   | 2756   |
| 137  | 4687   | 1156   | 368   | 1965   | 310   | 1606   |
| 89   | 1394   | 1149   | 1634  | 1572   | 472   | 712    |
| 33   | 4365   | 807    | 446   | 987    | 131   | 1164   |
| 82   | 4609   | 1215   | 630   | 910    | 301   | 2118   |
| 46   | 2675   | 394    | 128   | 238    | 12    | 2919   |
| 5    | 1293   | 226    | 118   | 235    | 27    | 6738   |

|     |      |      |      |      |     |      |
|-----|------|------|------|------|-----|------|
| 100 | 832  | 225  | 565  | 622  | 220 | 332  |
| 19  | 6500 | 838  | 323  | 732  | 83  | 1197 |
| 16  | 4792 | 595  | 134  | 572  | 206 | 3920 |
| 10  | 5083 | 392  | 158  | 326  | 41  | 1577 |
| 8   | 5139 | 1069 | 333  | 801  | 103 | 1631 |
| 158 | 4768 | 1358 | 1688 | 855  | 25  | 450  |
| 87  | 1148 | 508  | 530  | 523  | 528 | 610  |
| 57  | 1909 | 353  | 577  | 485  | 231 | 456  |
| 74  | 3695 | 594  | 77   | 635  | 25  | 1907 |
| 22  | 3930 | 566  | 218  | 505  | 63  | 929  |
| 19  | 4700 | 1642 | 406  | 1573 | 107 | 1008 |
| 148 | 1158 | 185  | 57   | 566  | 131 | 563  |
| 39  | 3160 | 1065 | 650  | 596  | 139 | 735  |
| 58  | 1282 | 676  | 901  | 513  | 93  | 1403 |
| 33  | 936  | 263  | 315  | 385  | 279 | 374  |
| 27  | 3055 | 613  | 391  | 500  | 116 | 987  |
| 10  | 3718 | 680  | 546  | 745  | 76  | 665  |
| 8   | 1928 | 367  | 453  | 524  | 241 | 428  |
| 91  | 1251 | 391  | 610  | 539  | 141 | 204  |
| 4   | 1104 | 241  | 54   | 164  | 162 | 2150 |
| 20  | 6239 | 1194 | 447  | 866  | 40  | 965  |
| 6   | 3066 | 404  | 328  | 350  | 90  | 715  |
| 55  | 818  | 275  | 419  | 448  | 245 | 261  |
| 22  | 1568 | 529  | 74   | 245  | 27  | 1080 |
| 18  | 1279 | 438  | 117  | 537  | 77  | 618  |
| 70  | 608  | 424  | 321  | 389  | 75  | 209  |
| 54  | 1204 | 375  | 173  | 445  | 83  | 460  |
| 1   | 460  | 25   | 16   | 54   | 6   | 1799 |
| 5   | 1169 | 347  | 303  | 654  | 106 | 437  |
| 11  | 2372 | 686  | 176  | 341  | 68  | 450  |
| 4   | 1641 | 240  | 69   | 207  | 20  | 892  |
| 15  | 649  | 453  | 68   | 278  | 85  | 668  |
| 74  | 364  | 206  | 198  | 274  | 104 | 151  |
| 49  | 518  | 141  | 188  | 202  | 121 | 229  |
| 39  | 534  | 162  | 201  | 292  | 122 | 296  |
| 7   | 916  | 152  | 23   | 88   | 11  | 540  |
| 1   | 2445 | 174  | 178  | 181  | 7   | 259  |
| 29  | 931  | 611  | 323  | 496  | 72  | 318  |
| 40  | 394  | 130  | 87   | 294  | 127 | 309  |
| 25  | 1789 | 440  | 152  | 296  | 19  | 395  |
| 33  | 876  | 229  | 97   | 144  | 30  | 436  |
| 8   | 1251 | 126  | 35   | 98   | 9   | 733  |
| 13  | 726  | 176  | 126  | 218  | 88  | 274  |
| 17  | 1460 | 525  | 192  | 478  | 47  | 341  |
| 2   | 1264 | 154  | 58   | 124  | 34  | 596  |
| 6   | 1129 | 126  | 75   | 120  | 20  | 559  |
| 21  | 1499 | 285  | 70   | 249  | 28  | 595  |
| 14  | 601  | 168  | 131  | 213  | 59  | 251  |
| 4   | 425  | 102  | 50   | 110  | 49  | 203  |
| 3   | 1745 | 130  | 107  | 133  | 14  | 235  |
| 2   | 620  | 114  | 124  | 160  | 60  | 427  |
| 25  | 579  | 108  | 85   | 134  | 17  | 188  |
| 4   | 625  | 250  | 230  | 96   | 41  | 200  |
| 13  | 666  | 197  | 26   | 185  | 25  | 341  |
| 13  | 666  | 197  | 26   | 185  | 25  | 341  |
| 7   | 853  | 134  | 88   | 111  | 14  | 309  |
| 0   | 569  | 99   | 137  | 140  | 53  | 191  |
| 8   | 387  | 62   | 72   | 129  | 65  | 114  |
| 41  | 936  | 99   | 10   | 188  | 25  | 313  |

|    |     |     |     |     |    |     |
|----|-----|-----|-----|-----|----|-----|
| 17 | 441 | 169 | 68  | 116 | 33 | 316 |
| 2  | 137 | 21  | 5   | 28  | 6  | 913 |
| 7  | 171 | 93  | 84  | 115 | 52 | 117 |
| 6  | 605 | 140 | 171 | 228 | 23 | 133 |
| 16 | 310 | 87  | 50  | 143 | 49 | 121 |
| 3  | 585 | 158 | 248 | 147 | 18 | 61  |
| 8  | 385 | 71  | 148 | 84  | 7  | 31  |
| 5  | 309 | 86  | 91  | 70  | 11 | 466 |
| 21 | 245 | 92  | 31  | 127 | 46 | 174 |
| 3  | 757 | 261 | 84  | 127 | 18 | 127 |
| 4  | 522 | 124 | 139 | 128 | 15 | 118 |
| 1  | 885 | 101 | 30  | 85  | 14 | 171 |
| 8  | 481 | 126 | 60  | 116 | 23 | 129 |
| 3  | 627 | 96  | 70  | 142 | 7  | 143 |
| 2  | 653 | 58  | 68  | 54  | 22 | 195 |
| 7  | 635 | 128 | 59  | 131 | 12 | 140 |
| 2  | 318 | 99  | 57  | 112 | 20 | 106 |
| 2  | 353 | 141 | 100 | 94  | 28 | 135 |
| 3  | 370 | 103 | 102 | 119 | 27 | 128 |
| 8  | 81  | 31  | 21  | 39  | 46 | 66  |
| 3  | 318 | 130 | 66  | 99  | 24 | 122 |
| 0  | 130 | 8   | 5   | 21  | 1  | 319 |
| 7  | 221 | 26  | 60  | 59  | 25 | 37  |
| 2  | 115 | 50  | 49  | 74  | 42 | 87  |
| 6  | 341 | 216 | 38  | 133 | 29 | 161 |
| 8  | 97  | 60  | 46  | 55  | 24 | 37  |
| 1  | 422 | 68  | 60  | 91  | 18 | 91  |
| 10 | 241 | 95  | 29  | 81  | 3  | 309 |
| 0  | 456 | 38  | 28  | 42  | 11 | 135 |
| 13 | 324 | 39  | 2   | 59  | 13 | 379 |
| 0  | 127 | 66  | 68  | 105 | 31 | 55  |
| 0  | 97  | 14  | 13  | 42  | 38 | 269 |
| 3  | 255 | 35  | 84  | 66  | 16 | 26  |
| 0  | 594 | 82  | 85  | 70  | 2  | 36  |
| 1  | 239 | 35  | 52  | 29  | 5  | 85  |
| 2  | 273 | 40  | 20  | 67  | 6  | 84  |
| 4  | 151 | 36  | 42  | 80  | 8  | 54  |
| 0  | 71  | 10  | 4   | 8   | 0  | 373 |
| 1  | 209 | 61  | 39  | 62  | 16 | 79  |
| 0  | 193 | 39  | 68  | 77  | 18 | 47  |
| 0  | 209 | 41  | 8   | 46  | 3  | 139 |
| 2  | 419 | 108 | 31  | 94  | 5  | 108 |
| 2  | 83  | 34  | 50  | 53  | 35 | 46  |
| 1  | 415 | 59  | 69  | 93  | 11 | 53  |
| 13 | 31  | 10  | 12  | 10  | 25 | 266 |
| 3  | 178 | 47  | 12  | 37  | 5  | 307 |
| 2  | 275 | 47  | 40  | 44  | 6  | 34  |
| 1  | 159 | 85  | 68  | 34  | 12 | 60  |
| 1  | 139 | 30  | 22  | 27  | 13 | 72  |
| 14 | 59  | 48  | 43  | 65  | 19 | 31  |
| 6  | 143 | 91  | 33  | 49  | 8  | 89  |
| 0  | 140 | 77  | 5   | 46  | 7  | 180 |
| 1  | 151 | 46  | 23  | 72  | 8  | 50  |
| 5  | 224 | 10  | 9   | 74  | 12 | 55  |
| 8  | 309 | 94  | 21  | 57  | 11 | 108 |
| 0  | 611 | 40  | 77  | 45  | 4  | 114 |
| 6  | 111 | 15  | 7   | 57  | 22 | 65  |
| 4  | 179 | 25  | 0   | 60  | 19 | 49  |
| 5  | 221 | 59  | 12  | 50  | 4  | 135 |



|    |     |    |    |    |     |     |
|----|-----|----|----|----|-----|-----|
| 8  | 118 | 10 | 0  | 75 | 7   | 43  |
| 3  | 165 | 63 | 10 | 39 | 6   | 120 |
| 5  | 205 | 27 | 36 | 42 | 15  | 27  |
| 4  | 83  | 24 | 30 | 48 | 22  | 44  |
| 5  | 208 | 53 | 12 | 50 | 4   | 130 |
| 5  | 156 | 18 | 3  | 53 | 9   | 46  |
| 1  | 153 | 34 | 13 | 34 | 33  | 88  |
| 2  | 231 | 63 | 28 | 38 | 5   | 88  |
| 0  | 20  | 0  | 0  | 12 | 103 | 16  |
| 0  | 207 | 43 | 3  | 18 | 1   | 133 |
| 1  | 322 | 49 | 15 | 45 | 4   | 67  |
| 11 | 29  | 15 | 29 | 40 | 39  | 21  |
| 8  | 124 | 17 | 23 | 26 | 4   | 16  |
| 2  | 131 | 39 | 38 | 39 | 9   | 137 |
| 2  | 107 | 11 | 7  | 10 | 3   | 382 |
| 1  | 124 | 25 | 25 | 20 | 8   | 45  |
| 2  | 268 | 30 | 14 | 33 | 4   | 60  |
| 1  | 39  | 21 | 17 | 40 | 2   | 38  |
| 4  | 114 | 66 | 70 | 64 | 4   | 19  |
| 6  | 63  | 93 | 17 | 24 | 9   | 31  |
| 7  | 93  | 22 | 31 | 51 | 2   | 17  |
| 1  | 144 | 17 | 25 | 53 | 6   | 13  |
| 0  | 314 | 16 | 11 | 22 | 2   | 114 |
| 1  | 94  | 19 | 0  | 57 | 10  | 31  |
| 2  | 83  | 31 | 43 | 34 | 12  | 26  |
| 3  | 116 | 37 | 16 | 36 | 9   | 35  |
| 1  | 136 | 17 | 23 | 50 | 19  | 7   |
| 1  | 88  | 8  | 26 | 28 | 9   | 40  |
| 1  | 91  | 37 | 41 | 40 | 5   | 26  |
| 5  | 91  | 66 | 34 | 19 | 10  | 34  |
| 15 | 173 | 26 | 0  | 50 | 3   | 185 |
| 3  | 102 | 17 | 25 | 17 | 5   | 16  |
| 0  | 95  | 15 | 4  | 11 | 21  | 55  |
| 13 | 49  | 47 | 20 | 29 | 11  | 29  |
| 5  | 149 | 61 | 27 | 44 | 4   | 26  |
| 1  | 100 | 33 | 12 | 38 | 2   | 62  |
| 0  | 45  | 3  | 0  | 2  | 2   | 64  |
| 0  | 282 | 27 | 16 | 36 | 2   | 22  |
| 6  | 28  | 45 | 18 | 11 | 4   | 83  |
| 0  | 90  | 8  | 21 | 29 | 8   | 17  |
| 0  | 168 | 46 | 30 | 27 | 10  | 57  |
| 1  | 96  | 7  | 19 | 10 | 4   | 38  |
| 2  | 45  | 11 | 0  | 37 | 5   | 33  |
| 1  | 49  | 7  | 15 | 33 | 7   | 35  |
| 0  | 46  | 9  | 9  | 25 | 10  | 17  |
| 0  | 39  | 6  | 22 | 11 | 19  | 27  |
| 0  | 70  | 26 | 25 | 21 | 3   | 16  |
| 0  | 191 | 26 | 29 | 29 | 4   | 24  |
| 1  | 121 | 20 | 7  | 15 | 2   | 47  |
| 3  | 90  | 13 | 31 | 24 | 10  | 15  |
| 0  | 66  | 11 | 3  | 11 | 0   | 53  |
| 0  | 46  | 17 | 10 | 18 | 7   | 14  |
| 1  | 121 | 23 | 9  | 16 | 8   | 23  |
| 1  | 78  | 16 | 28 | 28 | 2   | 20  |
| 1  | 126 | 6  | 21 | 27 | 7   | 68  |
| 1  | 89  | 10 | 4  | 28 | 1   | 73  |
| 1  | 64  | 35 | 6  | 16 | 4   | 30  |
| 1  | 44  | 17 | 10 | 21 | 6   | 29  |
| 2  | 77  | 7  | 1  | 22 | 2   | 25  |

|   |     |    |    |    |    |     |
|---|-----|----|----|----|----|-----|
| 0 | 237 | 33 | 16 | 17 | 3  | 31  |
| 0 | 112 | 29 | 4  | 16 | 0  | 48  |
| 1 | 173 | 57 | 26 | 17 | 4  | 26  |
| 1 | 173 | 57 | 26 | 17 | 4  | 26  |
| 2 | 47  | 8  | 0  | 24 | 6  | 11  |
| 0 | 33  | 9  | 11 | 11 | 2  | 6   |
| 0 | 94  | 15 | 16 | 20 | 5  | 42  |
| 1 | 68  | 13 | 2  | 41 | 6  | 42  |
| 0 | 82  | 29 | 11 | 48 | 6  | 40  |
| 1 | 47  | 14 | 12 | 23 | 7  | 12  |
| 1 | 125 | 10 | 3  | 20 | 4  | 25  |
| 1 | 52  | 15 | 19 | 15 | 2  | 1   |
| 0 | 54  | 19 | 10 | 27 | 2  | 26  |
| 5 | 30  | 34 | 4  | 11 | 3  | 20  |
| 0 | 18  | 8  | 17 | 3  | 0  | 10  |
| 0 | 74  | 12 | 4  | 6  | 7  | 70  |
| 0 | 135 | 21 | 22 | 24 | 3  | 18  |
| 0 | 20  | 0  | 0  | 2  | 0  | 68  |
| 1 | 102 | 15 | 9  | 21 | 6  | 12  |
| 1 | 85  | 31 | 2  | 35 | 1  | 12  |
| 1 | 31  | 7  | 15 | 20 | 6  | 11  |
| 2 | 29  | 13 | 7  | 20 | 5  | 10  |
| 1 | 81  | 30 | 2  | 34 | 1  | 11  |
| 2 | 23  | 11 | 9  | 10 | 5  | 6   |
| 0 | 73  | 26 | 28 | 11 | 1  | 8   |
| 0 | 82  | 8  | 5  | 9  | 5  | 23  |
| 0 | 51  | 14 | 9  | 15 | 4  | 13  |
| 0 | 5   | 0  | 2  | 0  | 0  | 100 |
| 1 | 17  | 5  | 10 | 20 | 3  | 12  |
| 0 | 44  | 8  | 10 | 11 | 5  | 6   |
| 0 | 34  | 3  | 6  | 18 | 4  | 16  |
| 0 | 20  | 2  | 3  | 20 | 5  | 15  |
| 6 | 33  | 9  | 11 | 12 | 1  | 16  |
| 0 | 18  | 0  | 0  | 2  | 0  | 53  |
| 0 | 151 | 14 | 14 | 21 | 2  | 11  |
| 1 | 52  | 11 | 0  | 16 | 0  | 18  |
| 0 | 0   | 0  | 0  | 0  | 0  | 0   |
| 2 | 34  | 7  | 4  | 11 | 2  | 6   |
| 1 | 21  | 11 | 9  | 18 | 8  | 10  |
| 0 | 65  | 11 | 9  | 12 | 0  | 6   |
| 1 | 34  | 2  | 1  | 11 | 1  | 6   |
| 1 | 34  | 14 | 3  | 18 | 3  | 21  |
| 2 | 22  | 6  | 2  | 15 | 4  | 14  |
| 0 | 36  | 8  | 12 | 10 | 1  | 11  |
| 0 | 27  | 13 | 22 | 15 | 4  | 10  |
| 1 | 15  | 20 | 6  | 13 | 5  | 10  |
| 1 | 44  | 11 | 0  | 16 | 0  | 14  |
| 2 | 28  | 5  | 1  | 16 | 5  | 16  |
| 0 | 40  | 7  | 1  | 3  | 0  | 31  |
| 0 | 21  | 11 | 1  | 10 | 2  | 39  |
| 0 | 75  | 19 | 9  | 14 | 0  | 37  |
| 0 | 49  | 2  | 10 | 13 | 4  | 11  |
| 1 | 40  | 14 | 6  | 11 | 0  | 28  |
| 0 | 7   | 1  | 4  | 5  | 10 | 21  |
| 5 | 22  | 3  | 3  | 11 | 9  | 14  |
| 0 | 22  | 8  | 1  | 6  | 0  | 32  |
| 3 | 16  | 8  | 9  | 8  | 0  | 3   |
| 0 | 49  | 5  | 3  | 7  | 2  | 26  |
| 0 | 38  | 6  | 11 | 6  | 1  | 20  |

|   |    |    |    |    |    |    |
|---|----|----|----|----|----|----|
| 3 | 19 | 4  | 0  | 8  | 6  | 32 |
| 3 | 14 | 3  | 2  | 13 | 0  | 8  |
| 0 | 36 | 9  | 11 | 26 | 0  | 9  |
| 0 | 20 | 6  | 3  | 19 | 7  | 7  |
| 2 | 34 | 4  | 9  | 2  | 0  | 6  |
| 3 | 29 | 8  | 2  | 16 | 1  | 17 |
| 0 | 13 | 7  | 8  | 6  | 1  | 17 |
| 0 | 7  | 5  | 4  | 8  | 7  | 5  |
| 1 | 25 | 5  | 6  | 13 | 1  | 7  |
| 0 | 21 | 8  | 12 | 8  | 0  | 5  |
| 0 | 36 | 15 | 5  | 13 | 4  | 6  |
| 2 | 25 | 4  | 4  | 6  | 3  | 11 |
| 0 | 26 | 3  | 2  | 3  | 0  | 54 |
| 0 | 66 | 21 | 1  | 9  | 0  | 26 |
| 0 | 24 | 2  | 4  | 2  | 0  | 9  |
| 2 | 32 | 9  | 6  | 15 | 0  | 5  |
| 0 | 21 | 5  | 6  | 3  | 8  | 6  |
| 0 | 54 | 7  | 4  | 10 | 0  | 7  |
| 0 | 22 | 4  | 7  | 7  | 10 | 12 |
| 0 | 27 | 10 | 3  | 17 | 3  | 22 |
| 0 | 10 | 6  | 6  | 9  | 1  | 9  |
| 0 | 41 | 10 | 0  | 7  | 0  | 19 |
| 0 | 24 | 10 | 4  | 5  | 2  | 8  |
| 0 | 36 | 4  | 1  | 9  | 3  | 7  |
| 0 | 16 | 4  | 7  | 5  | 4  | 8  |
| 0 | 31 | 4  | 0  | 17 | 0  | 10 |
| 0 | 20 | 0  | 6  | 2  | 8  | 42 |
| 0 | 13 | 5  | 14 | 11 | 0  | 10 |
| 0 | 35 | 7  | 3  | 6  | 0  | 12 |
| 2 | 18 | 2  | 9  | 6  | 0  | 8  |
| 0 | 14 | 5  | 5  | 9  | 2  | 2  |
| 0 | 27 | 5  | 12 | 5  | 2  | 5  |
| 0 | 30 | 0  | 0  | 1  | 2  | 44 |
| 0 | 13 | 5  | 1  | 3  | 1  | 12 |
| 1 | 43 | 13 | 1  | 6  | 0  | 18 |
| 0 | 24 | 6  | 8  | 6  | 2  | 3  |
| 0 | 37 | 6  | 1  | 7  | 2  | 5  |
| 1 | 1  | 2  | 3  | 10 | 1  | 4  |
| 0 | 11 | 0  | 0  | 1  | 0  | 41 |
| 0 | 20 | 1  | 2  | 4  | 0  | 5  |
| 0 | 18 | 8  | 9  | 12 | 1  | 7  |
| 0 | 4  | 3  | 4  | 12 | 4  | 7  |
| 0 | 29 | 4  | 3  | 8  | 1  | 6  |
| 1 | 16 | 6  | 11 | 6  | 6  | 3  |
| 2 | 5  | 6  | 6  | 9  | 3  | 8  |
| 0 | 9  | 1  | 5  | 10 | 1  | 7  |
| 0 | 27 | 4  | 2  | 2  | 2  | 1  |
| 0 | 13 | 2  | 1  | 1  | 0  | 34 |
| 0 | 33 | 9  | 0  | 9  | 0  | 3  |
| 1 | 23 | 8  | 3  | 8  | 0  | 10 |
| 0 | 16 | 4  | 5  | 3  | 2  | 2  |
| 1 | 18 | 8  | 3  | 8  | 1  | 9  |
| 0 | 15 | 3  | 4  | 11 | 0  | 1  |
| 0 | 14 | 0  | 2  | 1  | 1  | 66 |
| 0 | 26 | 15 | 12 | 0  | 2  | 6  |
| 0 | 42 | 4  | 1  | 2  | 0  | 10 |
| 0 | 20 | 3  | 2  | 5  | 0  | 15 |
| 0 | 14 | 3  | 3  | 7  | 0  | 5  |
| 0 | 29 | 3  | 2  | 6  | 0  | 19 |

|   |    |    |   |    |   |    |
|---|----|----|---|----|---|----|
| 0 | 36 | 2  | 5 | 4  | 1 | 4  |
| 0 | 29 | 4  | 1 | 5  | 1 | 12 |
| 0 | 8  | 7  | 3 | 3  | 1 | 4  |
| 0 | 27 | 6  | 3 | 9  | 0 | 9  |
| 1 | 7  | 4  | 3 | 7  | 1 | 1  |
| 1 | 26 | 3  | 4 | 7  | 0 | 2  |
| 0 | 24 | 1  | 3 | 5  | 2 | 4  |
| 0 | 15 | 0  | 0 | 3  | 1 | 19 |
| 0 | 10 | 3  | 0 | 5  | 1 | 16 |
| 0 | 7  | 2  | 2 | 5  | 1 | 1  |
| 1 | 30 | 9  | 2 | 5  | 2 | 5  |
| 0 | 7  | 1  | 1 | 10 | 0 | 4  |
| 0 | 9  | 3  | 0 | 4  | 1 | 4  |
| 0 | 20 | 2  | 0 | 13 | 0 | 13 |
| 0 | 4  | 1  | 1 | 5  | 0 | 5  |
| 0 | 3  | 3  | 1 | 2  | 0 | 30 |
| 0 | 8  | 0  | 1 | 6  | 2 | 2  |
| 0 | 22 | 0  | 3 | 3  | 2 | 7  |
| 0 | 5  | 0  | 5 | 4  | 1 | 6  |
| 0 | 9  | 0  | 1 | 5  | 1 | 5  |
| 1 | 3  | 4  | 2 | 8  | 1 | 3  |
| 3 | 1  | 4  | 0 | 2  | 1 | 4  |
| 0 | 14 | 1  | 1 | 10 | 3 | 6  |
| 0 | 14 | 3  | 1 | 6  | 2 | 3  |
| 0 | 22 | 3  | 2 | 0  | 0 | 3  |
| 0 | 9  | 0  | 0 | 2  | 1 | 5  |
| 0 | 20 | 1  | 2 | 0  | 0 | 2  |
| 0 | 21 | 4  | 3 | 6  | 0 | 5  |
| 0 | 4  | 2  | 0 | 5  | 0 | 2  |
| 0 | 8  | 4  | 0 | 2  | 4 | 10 |
| 0 | 68 | 0  | 3 | 2  | 0 | 0  |
| 0 | 7  | 2  | 4 | 2  | 1 | 2  |
| 0 | 14 | 1  | 0 | 6  | 0 | 4  |
| 0 | 14 | 4  | 0 | 4  | 0 | 10 |
| 0 | 13 | 2  | 4 | 1  | 0 | 4  |
| 0 | 12 | 5  | 2 | 3  | 1 | 10 |
| 0 | 6  | 1  | 0 | 1  | 0 | 9  |
| 0 | 19 | 4  | 1 | 1  | 1 | 12 |
| 0 | 5  | 4  | 2 | 2  | 0 | 3  |
| 0 | 6  | 6  | 5 | 2  | 2 | 5  |
| 0 | 15 | 0  | 0 | 1  | 1 | 0  |
| 0 | 11 | 5  | 3 | 5  | 0 | 12 |
| 0 | 17 | 10 | 2 | 4  | 1 | 7  |
| 0 | 18 | 4  | 0 | 1  | 0 | 14 |
| 1 | 7  | 5  | 3 | 4  | 0 | 3  |
| 0 | 16 | 2  | 2 | 2  | 0 | 1  |
| 1 | 6  | 1  | 0 | 1  | 0 | 2  |
| 0 | 4  | 2  | 4 | 6  | 0 | 7  |
| 0 | 11 | 3  | 7 | 6  | 1 | 1  |
| 0 | 5  | 0  | 1 | 4  | 0 | 5  |
| 0 | 5  | 10 | 0 | 3  | 0 | 8  |
| 0 | 1  | 0  | 0 | 0  | 0 | 19 |
| 0 | 0  | 0  | 0 | 1  | 0 | 27 |
| 0 | 19 | 2  | 0 | 3  | 1 | 16 |
| 0 | 6  | 1  | 2 | 4  | 1 | 5  |
| 0 | 2  | 4  | 1 | 4  | 1 | 2  |
| 0 | 5  | 0  | 2 | 4  | 2 | 1  |
| 0 | 8  | 1  | 0 | 1  | 3 | 1  |
| 0 | 1  | 2  | 1 | 0  | 0 | 23 |

|   |    |   |   |   |   |    |
|---|----|---|---|---|---|----|
| 0 | 14 | 0 | 0 | 7 | 0 | 16 |
| 0 | 12 | 0 | 0 | 5 | 0 | 5  |
| 0 | 10 | 1 | 2 | 4 | 0 | 10 |
| 0 | 1  | 3 | 1 | 4 | 1 | 3  |
| 0 | 7  | 2 | 1 | 3 | 1 | 2  |
| 1 | 6  | 0 | 0 | 2 | 0 | 6  |
| 0 | 5  | 0 | 2 | 0 | 0 | 27 |
| 0 | 9  | 3 | 1 | 2 | 3 | 6  |
| 0 | 4  | 2 | 1 | 1 | 0 | 4  |
| 0 | 9  | 1 | 4 | 3 | 0 | 2  |
| 0 | 8  | 9 | 2 | 2 | 1 | 6  |
| 0 | 0  | 1 | 0 | 2 | 1 | 23 |
| 0 | 3  | 2 | 2 | 3 | 0 | 1  |
| 0 | 7  | 0 | 2 | 1 | 0 | 2  |
| 0 | 0  | 4 | 2 | 0 | 1 | 2  |
| 0 | 3  | 1 | 2 | 5 | 0 | 4  |
| 0 | 4  | 2 | 0 | 2 | 0 | 2  |
| 0 | 4  | 1 | 1 | 7 | 3 | 2  |
| 0 | 7  | 2 | 0 | 1 | 1 | 2  |
| 0 | 7  | 2 | 3 | 3 | 1 | 6  |
| 1 | 9  | 1 | 0 | 4 | 2 | 1  |
| 0 | 7  | 0 | 1 | 2 | 0 | 42 |
| 0 | 16 | 2 | 0 | 1 | 0 | 1  |
| 0 | 4  | 0 | 0 | 3 | 0 | 0  |
| 0 | 11 | 0 | 1 | 1 | 0 | 4  |
| 0 | 4  | 0 | 1 | 1 | 0 | 0  |
| 0 | 9  | 1 | 0 | 4 | 0 | 7  |
| 0 | 4  | 5 | 0 | 3 | 0 | 9  |
| 0 | 7  | 2 | 9 | 2 | 1 | 1  |
| 0 | 1  | 3 | 1 | 3 | 0 | 2  |
| 0 | 8  | 5 | 4 | 7 | 0 | 2  |
| 0 | 8  | 1 | 0 | 2 | 0 | 1  |
| 0 | 3  | 4 | 0 | 6 | 1 | 5  |
| 2 | 3  | 2 | 5 | 0 | 0 | 1  |
| 1 | 8  | 0 | 0 | 4 | 1 | 3  |
| 0 | 11 | 4 | 2 | 2 | 1 | 2  |
| 0 | 11 | 3 | 1 | 2 | 0 | 1  |
| 0 | 13 | 2 | 2 | 5 | 0 | 5  |
| 0 | 5  | 1 | 2 | 2 | 0 | 0  |
| 0 | 6  | 2 | 1 | 0 | 0 | 0  |
| 0 | 5  | 1 | 0 | 1 | 0 | 3  |
| 0 | 6  | 2 | 1 | 3 | 0 | 2  |
| 1 | 5  | 5 | 2 | 2 | 0 | 3  |
| 0 | 7  | 2 | 2 | 1 | 0 | 1  |
| 0 | 5  | 3 | 2 | 2 | 0 | 0  |
| 0 | 2  | 0 | 0 | 0 | 0 | 9  |
| 0 | 5  | 2 | 0 | 2 | 0 | 4  |
| 0 | 10 | 3 | 0 | 1 | 0 | 7  |
| 0 | 5  | 1 | 3 | 1 | 0 | 1  |
| 0 | 9  | 0 | 0 | 2 | 0 | 8  |
| 1 | 2  | 4 | 0 | 0 | 2 | 0  |
| 0 | 7  | 0 | 0 | 0 | 1 | 2  |
| 0 | 1  | 1 | 0 | 1 | 0 | 2  |
| 0 | 12 | 0 | 1 | 1 | 0 | 5  |
| 0 | 4  | 0 | 0 | 0 | 0 | 2  |
| 1 | 9  | 5 | 1 | 2 | 0 | 3  |
| 0 | 3  | 1 | 2 | 1 | 0 | 0  |
| 0 | 3  | 1 | 0 | 1 | 0 | 9  |
| 0 | 4  | 0 | 0 | 0 | 0 | 10 |



|        |         |         |         |         |        |         |
|--------|---------|---------|---------|---------|--------|---------|
| 78     | 79      | 80      | 81      | 82      | 83     | 84      |
| 13     | 14      | 15      | 16      | 17      | 18     | 19      |
| CHR_P  | CHR_P   | CHR_P   | CHR_P   | CHR_P   | CHR_P  | CHR_P   |
| D_6    | E_19    | E_21    | E_22    | E_23    | E_3    | E_46    |
| 128375 | 4686947 | 1336672 | 1032612 | 1495548 | 331698 | 1653485 |
| CHR_P  | CHR_P   | CHR_P   | CHR_P   | CHR_P   | CHR_P  | CHR_P   |
| 10.18  | 7.73    | 6.27    | 11.78   | 8.28    | 12.13  | 5.36    |
| 7.08   | 3.56    | 5.24    | 6.21    | 3.76    | 1.94   | 1.30    |
| 1.60   | 1.17    | 1.04    | 1.07    | 2.90    | 6.63   | 1.74    |
| 2.04   | 2.57    | 1.82    | 2.22    | 2.44    | 1.11   | 1.10    |
| 1.43   | 1.19    | 1.49    | 1.96    | 2.00    | 2.90   | 2.43    |
| 1.30   | 2.72    | 3.91    | 0.92    | 1.59    | 0.33   | 3.51    |
| 1.00   | 1.71    | 2.96    | 1.61    | 2.41    | 1.10   | 2.25    |
| 0.06   | 1.21    | 0.48    | 0.12    | 0.25    | 0.08   | 4.28    |
| 0.43   | 1.14    | 1.46    | 0.49    | 0.81    | 0.39   | 1.50    |
| 1.13   | 1.04    | 0.68    | 0.52    | 0.76    | 0.13   | 0.62    |
| 0.40   | 0.59    | 0.28    | 0.16    | 0.46    | 0.21   | 0.45    |
| 0.28   | 0.56    | 0.57    | 0.57    | 0.41    | 0.63   | 0.62    |
| 0.15   | 0.48    | 0.35    | 0.11    | 0.68    | 0.11   | 0.44    |
| 0.30   | 0.34    | 0.24    | 0.50    | 0.33    | 0.25   | 0.24    |
| 0.33   | 0.35    | 0.28    | 0.05    | 0.29    | 0.07   | 0.68    |
| 0.06   | 0.11    | 0.18    | 0.22    | 0.21    | 0.73   | 0.23    |
| 0.09   | 0.49    | 0.31    | 0.05    | 0.32    | 0.04   | 0.44    |
| 0.20   | 0.49    | 0.22    | 0.13    | 0.20    | 0.16   | 0.35    |
| 0.16   | 0.30    | 0.31    | 0.12    | 0.20    | 0.10   | 0.33    |
| 0.55   | 0.16    | 0.25    | 0.17    | 0.25    | 0.16   | 0.22    |
| 0.13   | 0.26    | 0.21    | 0.10    | 0.18    | 0.13   | 0.23    |
| 0.07   | 0.26    | 0.10    | 0.11    | 0.12    | 0.07   | 0.11    |
| 0.18   | 0.19    | 0.15    | 0.09    | 0.14    | 0.07   | 0.19    |
| 0.06   | 0.31    | 0.33    | 0.09    | 0.19    | 0.04   | 0.33    |
| 0.28   | 0.29    | 0.21    | 0.04    | 0.16    | 0.03   | 0.41    |
| 0.06   | 0.25    | 0.14    | 0.13    | 0.13    | 0.11   | 0.16    |
| 0.06   | 0.10    | 0.06    | 0.14    | 0.11    | 0.14   | 0.10    |
| 0.23   | 0.09    | 0.12    | 0.06    | 0.06    | 0.02   | 0.18    |
| 0.07   | 0.20    | 0.20    | 0.14    | 0.19    | 0.10   | 0.13    |
| 0.09   | 0.15    | 0.14    | 0.13    | 0.17    | 0.09   | 0.06    |
| 0.07   | 0.17    | 0.20    | 0.08    | 0.13    | 0.20   | 0.19    |
| 0.10   | 0.10    | 0.09    | 0.10    | 0.11    | 0.08   | 0.07    |
| 0.02   | 0.16    | 0.11    | 0.05    | 0.07    | 0.05   | 0.34    |
| 0.03   | 0.07    | 0.04    | 0.01    | 0.03    | 0.02   | 0.44    |
| 0.07   | 0.19    | 0.19    | 0.14    | 0.18    | 0.09   | 0.12    |
| 0.04   | 0.12    | 0.09    | 0.16    | 0.10    | 0.04   | 0.06    |
| 0.31   | 0.14    | 0.11    | 0.07    | 0.06    | 0.04   | 0.09    |
| 0.18   | 0.14    | 0.22    | 0.04    | 0.16    | 0.03   | 0.06    |
| 0.07   | 0.07    | 0.04    | 0.14    | 0.11    | 0.03   | 0.04    |
| 0.25   | 0.01    | 0.03    | 0.04    | 0.04    | 0.11   | 0.03    |
| 0.03   | 0.04    | 0.05    | 0.06    | 0.06    | 0.04   | 0.05    |
| 0.10   | 0.06    | 0.05    | 0.04    | 0.06    | 0.09   | 0.07    |
| 0.02   | 0.11    | 0.08    | 0.12    | 0.08    | 0.07   | 0.06    |
| 0.08   | 0.05    | 0.03    | 0.01    | 0.02    | 0.01   | 0.18    |
| 0.03   | 0.09    | 0.08    | 0.07    | 0.11    | 0.09   | 0.15    |
| 0.03   | 0.06    | 0.06    | 0.04    | 0.07    | 0.05   | 0.05    |
| 0.03   | 0.08    | 0.10    | 0.06    | 0.06    | 0.04   | 0.05    |
| 0.04   | 0.02    | 0.02    | 0.05    | 0.03    | 0.11   | 0.05    |
| 0.00   | 0.02    | 0.01    | 0.00    | 0.02    | 0.01   | 0.15    |
| 0.03   | 0.02    | 0.03    | 0.01    | 0.01    | 0.03   | 0.19    |
| 0.07   | 0.05    | 0.02    | 0.01    | 0.07    | 0.03   | 0.02    |
| 0.02   | 0.07    | 0.07    | 0.02    | 0.05    | 0.02   | 0.06    |

|      |      |      |      |      |      |      |
|------|------|------|------|------|------|------|
| 0.02 | 0.04 | 0.02 | 0.04 | 0.03 | 0.01 | 0.03 |
| 0.10 | 0.03 | 0.04 | 0.01 | 0.03 | 0.01 | 0.03 |
| 0.01 | 0.08 | 0.05 | 0.02 | 0.01 | 0.03 | 0.05 |
| 0.00 | 0.01 | 0.00 | 0.00 | 0.00 | 0.00 | 0.18 |
| 0.01 | 0.04 | 0.05 | 0.05 | 0.03 | 0.02 | 0.02 |
| 0.02 | 0.05 | 0.05 | 0.04 | 0.03 | 0.04 | 0.06 |
| 0.03 | 0.03 | 0.03 | 0.01 | 0.04 | 0.03 | 0.03 |
| 0.02 | 0.01 | 0.03 | 0.05 | 0.03 | 0.05 | 0.01 |
| 0.01 | 0.03 | 0.02 | 0.01 | 0.02 | 0.01 | 0.02 |
| 0.02 | 0.03 | 0.03 | 0.02 | 0.02 | 0.03 | 0.04 |
| 0.01 | 0.02 | 0.01 | 0.00 | 0.01 | 0.00 | 0.06 |
| 0.00 | 0.01 | 0.01 | 0.00 | 0.01 | 0.00 | 0.14 |
| 0.03 | 0.01 | 0.01 | 0.02 | 0.01 | 0.02 | 0.01 |
| 0.00 | 0.05 | 0.02 | 0.01 | 0.02 | 0.01 | 0.02 |
| 0.00 | 0.03 | 0.01 | 0.00 | 0.01 | 0.02 | 0.08 |
| 0.00 | 0.04 | 0.01 | 0.00 | 0.01 | 0.00 | 0.03 |
| 0.00 | 0.04 | 0.03 | 0.01 | 0.02 | 0.01 | 0.03 |
| 0.04 | 0.03 | 0.03 | 0.05 | 0.02 | 0.00 | 0.01 |
| 0.02 | 0.01 | 0.01 | 0.02 | 0.01 | 0.05 | 0.01 |
| 0.01 | 0.01 | 0.01 | 0.02 | 0.01 | 0.02 | 0.01 |
| 0.02 | 0.03 | 0.01 | 0.00 | 0.01 | 0.00 | 0.04 |
| 0.01 | 0.03 | 0.01 | 0.01 | 0.01 | 0.01 | 0.02 |
| 0.00 | 0.03 | 0.04 | 0.01 | 0.03 | 0.01 | 0.02 |
| 0.04 | 0.01 | 0.00 | 0.00 | 0.01 | 0.01 | 0.01 |
| 0.01 | 0.02 | 0.03 | 0.02 | 0.01 | 0.01 | 0.02 |
| 0.01 | 0.01 | 0.02 | 0.03 | 0.01 | 0.01 | 0.03 |
| 0.01 | 0.01 | 0.01 | 0.01 | 0.01 | 0.03 | 0.01 |
| 0.01 | 0.02 | 0.02 | 0.01 | 0.01 | 0.01 | 0.02 |
| 0.00 | 0.03 | 0.02 | 0.02 | 0.02 | 0.01 | 0.01 |
| 0.00 | 0.01 | 0.01 | 0.01 | 0.01 | 0.02 | 0.01 |
| 0.02 | 0.01 | 0.01 | 0.02 | 0.01 | 0.01 | 0.00 |
| 0.00 | 0.01 | 0.01 | 0.00 | 0.00 | 0.02 | 0.04 |
| 0.01 | 0.04 | 0.03 | 0.01 | 0.02 | 0.00 | 0.02 |
| 0.00 | 0.02 | 0.01 | 0.01 | 0.01 | 0.01 | 0.01 |
| 0.01 | 0.01 | 0.01 | 0.01 | 0.01 | 0.02 | 0.01 |
| 0.01 | 0.01 | 0.01 | 0.00 | 0.01 | 0.00 | 0.02 |
| 0.00 | 0.01 | 0.01 | 0.00 | 0.01 | 0.01 | 0.01 |
| 0.02 | 0.00 | 0.01 | 0.01 | 0.01 | 0.01 | 0.00 |
| 0.01 | 0.01 | 0.01 | 0.01 | 0.01 | 0.01 | 0.01 |
| 0.00 | 0.00 | 0.00 | 0.00 | 0.00 | 0.00 | 0.04 |
| 0.00 | 0.01 | 0.01 | 0.01 | 0.01 | 0.01 | 0.01 |
| 0.00 | 0.02 | 0.02 | 0.01 | 0.01 | 0.01 | 0.01 |
| 0.00 | 0.01 | 0.01 | 0.00 | 0.00 | 0.00 | 0.02 |
| 0.00 | 0.00 | 0.01 | 0.00 | 0.01 | 0.01 | 0.01 |
| 0.02 | 0.00 | 0.01 | 0.01 | 0.01 | 0.01 | 0.00 |
| 0.01 | 0.00 | 0.00 | 0.01 | 0.00 | 0.01 | 0.00 |
| 0.01 | 0.00 | 0.00 | 0.01 | 0.01 | 0.01 | 0.01 |
| 0.00 | 0.01 | 0.00 | 0.00 | 0.00 | 0.00 | 0.01 |
| 0.00 | 0.02 | 0.00 | 0.01 | 0.00 | 0.00 | 0.01 |
| 0.01 | 0.01 | 0.02 | 0.01 | 0.01 | 0.01 | 0.01 |
| 0.01 | 0.00 | 0.00 | 0.00 | 0.01 | 0.01 | 0.01 |
| 0.01 | 0.01 | 0.01 | 0.00 | 0.01 | 0.00 | 0.01 |
| 0.01 | 0.01 | 0.01 | 0.00 | 0.00 | 0.00 | 0.01 |
| 0.00 | 0.01 | 0.00 | 0.00 | 0.00 | 0.00 | 0.02 |
| 0.00 | 0.01 | 0.00 | 0.00 | 0.00 | 0.01 | 0.01 |
| 0.00 | 0.01 | 0.01 | 0.01 | 0.01 | 0.00 | 0.01 |
| 0.00 | 0.01 | 0.00 | 0.00 | 0.00 | 0.00 | 0.01 |
| 0.00 | 0.01 | 0.00 | 0.00 | 0.00 | 0.00 | 0.01 |
| 0.01 | 0.01 | 0.01 | 0.00 | 0.01 | 0.00 | 0.01 |









|       |       |       |       |       |       |       |
|-------|-------|-------|-------|-------|-------|-------|
| -0.31 | 1.09  | 1.73  | -0.20 | 0.43  | -0.39 | 1.80  |
| 0.96  | 0.72  | -0.20 | -0.61 | 0.00  | -1.62 | -0.35 |
| -0.28 | 0.44  | -0.71 | -1.18 | -0.03 | -0.97 | -0.08 |
| -1.86 | 0.57  | 0.66  | 0.67  | -0.73 | 1.28  | 1.16  |
| -1.17 | 0.70  | -0.03 | -1.44 | 1.86  | -1.43 | 0.48  |
| -0.96 | -0.74 | -1.32 | 0.20  | -0.79 | -1.22 | -1.32 |
| 0.51  | 0.61  | 0.28  | -0.77 | 0.32  | -0.69 | 2.11  |
| -1.03 | -0.80 | -0.51 | -0.34 | -0.36 | 1.88  | -0.29 |
| -0.42 | 2.07  | 0.97  | -0.71 | 1.01  | -0.73 | 1.79  |
| -0.12 | 2.68  | 0.10  | -0.84 | -0.11 | -0.49 | 1.38  |
| -0.21 | 1.07  | 1.18  | -0.51 | 0.15  | -0.74 | 1.32  |
| 3.15  | -0.71 | 0.23  | -0.60 | 0.17  | -0.72 | -0.14 |
| -0.49 | 1.73  | 0.81  | -0.94 | 0.44  | -0.47 | 1.20  |
| -1.23 | 1.72  | -0.78 | -0.68 | -0.43 | -1.32 | -0.58 |
| 0.81  | 0.85  | 0.40  | -0.41 | 0.29  | -0.55 | 0.88  |
| -0.58 | 1.76  | 1.95  | -0.30 | 0.64  | -0.79 | 1.97  |
| 0.87  | 0.96  | 0.48  | -0.52 | 0.20  | -0.57 | 1.68  |
| -1.02 | 2.55  | 0.40  | 0.29  | 0.20  | -0.17 | 0.83  |
| -1.21 | -0.67 | -1.17 | -0.01 | -0.50 | 0.03  | -0.62 |
| 1.12  | -0.22 | 0.04  | -0.46 | -0.46 | -0.89 | 0.61  |
| -0.67 | 1.82  | 1.78  | 0.72  | 1.56  | -0.20 | 0.40  |
| -0.17 | 1.21  | 0.97  | 0.69  | 1.59  | -0.40 | -0.94 |
| -0.39 | 1.93  | 2.51  | -0.34 | 0.93  | 2.45  | 2.36  |
| -0.47 | -0.49 | -0.60 | -0.33 | -0.17 | -0.88 | -1.09 |
| -0.56 | 1.50  | 0.73  | -0.21 | 0.18  | -0.11 | 4.21  |
| -0.25 | -0.03 | -0.19 | -0.35 | -0.24 | -0.30 | 2.02  |
| -0.61 | 2.09  | 2.10  | 0.93  | 1.81  | -0.03 | 0.54  |
| -0.63 | -0.12 | -0.34 | 0.13  | -0.24 | -0.65 | -0.52 |
| 2.28  | 0.36  | -0.01 | -0.57 | -0.60 | -0.87 | -0.30 |
| 0.92  | 0.49  | 1.31  | -0.50 | 0.72  | -0.69 | -0.35 |
| -0.34 | -0.41 | -0.68 | 0.44  | 0.12  | -0.84 | -0.66 |
| 1.22  | -0.68 | -0.54 | -0.47 | -0.49 | 0.11  | -0.55 |
| -1.01 | -0.64 | -0.50 | -0.26 | -0.30 | -0.64 | -0.45 |
| 0.94  | -0.28 | -0.65 | -0.85 | -0.32 | 0.76  | 0.11  |
| -1.76 | 1.72  | 0.68  | 2.17  | 0.81  | 0.28  | -0.14 |
| 0.97  | 0.38  | -0.17 | -0.69 | -0.39 | -0.74 | 3.65  |
| -0.66 | 0.51  | 0.44  | 0.12  | 0.95  | 0.57  | 1.77  |
| -1.04 | 1.23  | 0.93  | -0.42 | 1.56  | 0.27  | -0.07 |
| -0.28 | 1.39  | 2.31  | 0.70  | 0.94  | -0.19 | 0.45  |
| -0.35 | -1.11 | -0.92 | 0.14  | -0.65 | 1.86  | 0.09  |
| -0.39 | 0.40  | -0.19 | -0.24 | 0.16  | -0.21 | 4.72  |
| -0.08 | -0.17 | -0.08 | -0.53 | -0.42 | 0.06  | 3.71  |
| 1.99  | 0.65  | -0.66 | -1.53 | 1.90  | -0.23 | -0.97 |
| -0.42 | 0.95  | 0.94  | -0.42 | 0.55  | -0.38 | 0.88  |
| -1.49 | 0.12  | -0.83 | 0.69  | -0.49 | -1.72 | -0.81 |
| 3.69  | -0.11 | 0.80  | -0.82 | 0.08  | -1.03 | 0.12  |
| -0.99 | 2.80  | 1.46  | -0.38 | -0.89 | 0.01  | 1.27  |

|       |       |       |       |       |       |       |
|-------|-------|-------|-------|-------|-------|-------|
| -0.27 | 0.17  | -0.28 | -0.31 | -0.24 | -0.22 | 7.00  |
| -1.32 | 1.33  | 1.98  | 1.68  | 0.21  | -0.99 | -0.29 |
| -0.71 | 2.33  | 2.48  | 1.12  | 0.81  | 1.16  | 2.75  |
| 0.30  | 0.19  | -0.16 | -1.42 | 0.91  | -0.04 | 0.21  |
| -0.48 | -0.82 | -0.33 | 0.26  | -0.18 | 0.13  | -0.69 |
| -1.31 | 0.51  | -0.38 | -0.86 | -0.25 | -0.95 | -0.03 |
| -0.11 | 0.88  | 0.65  | -0.20 | -0.18 | 0.59  | 1.82  |
| 0.18  | 0.75  | 0.03  | -0.42 | -0.32 | -0.64 | 4.01  |
| -0.24 | 0.12  | -0.04 | -0.13 | -0.06 | -0.18 | 6.06  |
| -0.24 | -1.36 | -1.38 | -0.68 | -0.92 | -0.47 | -1.30 |
| -1.13 | 2.84  | 0.39  | -0.62 | -0.06 | -0.81 | 0.80  |
| -0.59 | 1.60  | 0.18  | -0.58 | 0.03  | 0.58  | 5.08  |
| -0.78 | 2.54  | -0.08 | -0.54 | -0.33 | -0.64 | 2.21  |
| -1.22 | 2.70  | 1.54  | -0.27 | 0.54  | -0.31 | 2.41  |
| 0.09  | 0.01  | 0.00  | 0.25  | -0.19 | -0.40 | -0.31 |
| 0.03  | -0.95 | -0.64 | -0.36 | -0.72 | 2.09  | -0.63 |
| -0.59 | -0.68 | -1.16 | -0.24 | -0.97 | 0.20  | -1.08 |
| 0.81  | 1.50  | 0.42  | -0.72 | 0.35  | -0.72 | 2.76  |
| -1.09 | 1.84  | 0.00  | -0.93 | -0.38 | -1.02 | 0.71  |
| -0.77 | 2.76  | 3.63  | 0.20  | 2.88  | -0.08 | 1.23  |
| 1.67  | -0.74 | -1.04 | -1.27 | -0.40 | -0.37 | -0.45 |
| -0.56 | 0.96  | 1.41  | 0.70  | -0.18 | -0.12 | 0.09  |
| -0.17 | -0.32 | -0.12 | 0.18  | -0.27 | -0.32 | 0.21  |
| -0.85 | -1.00 | -1.02 | -0.71 | -0.84 | 0.87  | -0.90 |
| -0.74 | 0.64  | 0.02  | -0.24 | -0.36 | -0.33 | 0.53  |
| -1.67 | 3.01  | 1.12  | 1.18  | 1.02  | -0.72 | 0.55  |
| -1.47 | 0.19  | -0.47 | 0.26  | -0.13 | 1.59  | -0.49 |
| 0.60  | -0.71 | -0.64 | 0.23  | -0.44 | -0.26 | -1.14 |
| -0.46 | -0.15 | -0.24 | -0.43 | -0.35 | 0.22  | 1.57  |
| -0.48 | 6.11  | 3.61  | 1.01  | 1.84  | -0.68 | 2.04  |
| -1.28 | 2.29  | 0.20  | 0.26  | -0.20 | -0.01 | 1.08  |
| 0.14  | -1.47 | -1.28 | -0.02 | -0.68 | 2.12  | -1.55 |
| -0.09 | 0.82  | 1.13  | -0.63 | -0.13 | -0.58 | 2.69  |
| -1.01 | 0.18  | 0.63  | -1.25 | 0.88  | -0.24 | 1.18  |
| 0.72  | -0.93 | -0.18 | -0.23 | -0.42 | -0.57 | -0.93 |
| 1.47  | 0.15  | 0.33  | -0.65 | 0.45  | 0.03  | 0.42  |
| -0.27 | 0.30  | -0.20 | -0.22 | -0.10 | -0.21 | 6.69  |
| -1.43 | 0.43  | 0.50  | 0.74  | 2.02  | 0.97  | 0.64  |
| -0.60 | 2.24  | 2.25  | -0.05 | 0.34  | 0.17  | 0.73  |
| -0.51 | 1.52  | 0.42  | -0.29 | 0.16  | -0.33 | 2.83  |
| -0.44 | -0.28 | 1.02  | -0.77 | 0.01  | 0.45  | 1.57  |
| 2.58  | -1.27 | -0.68 | -0.41 | -0.46 | 0.52  | -1.14 |
| 2.09  | -1.25 | -1.32 | -0.41 | -0.97 | 1.84  | -0.83 |
| 0.60  | -0.85 | -0.80 | -0.26 | -0.24 | 1.07  | -0.29 |
| -0.41 | 0.68  | 0.04  | -0.65 | -0.37 | -0.57 | 1.76  |
| -0.97 | 1.99  | -0.27 | -0.05 | -0.33 | -0.90 | -0.08 |
| 0.94  | 0.65  | 4.04  | 2.05  | 2.34  | 0.81  | 0.65  |
| 0.54  | -1.02 | -0.93 | -1.03 | -0.25 | 1.02  | -0.24 |

|       |       |       |       |       |       |       |
|-------|-------|-------|-------|-------|-------|-------|
| -0.17 | 0.36  | 0.20  | -0.30 | -0.16 | -0.54 | -0.01 |
| 1.24  | 0.53  | 0.33  | -0.53 | -0.49 | -0.56 | 1.47  |
| -0.40 | 1.57  | -0.09 | -0.66 | -0.36 | -0.73 | 3.40  |
| -0.64 | -0.08 | -0.33 | -0.45 | -0.20 | 0.94  | 0.08  |
| -0.34 | 0.54  | 0.91  | -0.10 | 0.55  | -0.30 | 0.06  |
| -1.03 | 1.65  | 0.01  | -0.62 | -0.34 | -0.15 | 2.73  |
| -0.77 | 1.69  | -0.17 | -0.45 | -0.35 | -0.61 | 3.05  |
| 0.38  | 2.25  | 0.97  | -0.73 | 0.42  | -0.54 | 2.86  |
| -0.59 | -0.22 | -0.29 | -0.31 | -0.03 | 0.52  | 0.26  |
| -1.03 | -0.37 | -0.53 | -0.85 | -0.57 | 0.21  | 0.03  |
| -1.02 | 3.65  | -0.04 | 0.02  | -0.16 | -0.78 | 0.64  |
| -1.29 | 0.16  | -0.43 | -0.04 | -0.18 | 0.69  | 1.83  |
| 0.64  | -0.32 | -0.94 | -0.94 | -0.83 | -1.38 | -0.40 |
| -1.39 | 0.79  | 1.89  | 2.55  | -0.70 | 0.51  | 0.62  |
| 0.04  | 0.64  | 0.69  | -1.01 | 0.35  | -0.33 | 1.64  |
| 0.04  | 0.64  | 0.69  | -1.01 | 0.35  | -0.33 | 1.64  |
| -0.72 | 0.47  | -0.29 | -0.45 | -0.54 | -0.83 | 0.57  |
| -1.28 | 0.17  | -0.41 | 0.25  | -0.18 | 0.57  | 0.14  |
| -0.82 | -0.38 | -1.13 | -0.69 | -0.34 | 1.80  | -0.61 |
| 2.79  | 1.44  | -0.08 | -0.85 | 0.52  | -0.08 | 1.39  |
| 0.71  | 0.19  | 0.65  | -0.26 | -0.08 | 0.22  | 1.72  |
| -0.21 | -0.04 | -0.20 | -0.34 | -0.17 | -0.18 | 6.52  |
| -0.90 | -1.14 | -0.68 | -0.53 | -0.58 | 0.51  | -0.62 |
| -0.64 | 0.73  | 0.31  | 1.25  | 1.07  | -0.28 | -0.02 |
| 0.57  | -0.39 | -0.42 | -0.71 | 0.09  | 0.94  | -0.22 |
| -0.89 | 0.30  | 0.21  | 1.56  | -0.03 | -0.54 | -0.71 |
| -0.36 | -0.20 | -0.42 | 0.23  | -0.40 | -0.66 | -0.67 |
| -0.23 | 0.16  | 0.13  | 0.43  | -0.12 | -0.31 | 3.29  |
| 2.42  | -0.37 | 0.04  | -0.97 | 0.44  | 1.76  | 1.10  |
| -0.99 | 2.25  | 2.99  | 0.32  | 0.42  | -0.30 | 0.33  |
| -0.71 | 0.35  | 0.09  | 0.60  | -0.01 | -0.53 | -0.14 |
| -0.72 | 2.73  | 0.56  | -0.32 | 0.20  | -0.08 | 1.18  |
| -0.24 | 0.97  | 0.70  | -0.37 | 0.20  | -0.06 | 0.33  |

| 7           | 8            | 9            | 10          | 11          | 12           | 13           |
|-------------|--------------|--------------|-------------|-------------|--------------|--------------|
| 78          | 79           | 80           | 81          | 82          | 83           | 84           |
| TAGCACCATCT | GAATGTTGCTCG | ATGCACCTGGGC | CACCCGTAGAA | TGCGGGGCTAG | ATCACATTGCCA | AATTGCACGGTA |
| miR-29a-3p  | miR-409-3p   | miR-500a-3p  | miR-99b-5p  | miR-744-5p  | miR-23b-3p   | miR-363-3p   |
| 67482       | 67182        | 65049        | 56245       | 56410       | 53026        | 52323        |
| -0.31       | 1.96         | 0.19         | -0.29       | -0.65       | 0.09         | -0.38        |
| -0.98       | -1.03        | -1.38        | 4.80        | -1.18       | -0.50        | 0.32         |
| -0.02       | -0.56        | -0.24        | -0.35       | -1.00       | -1.08        | 2.78         |
| -0.65       | -0.95        | -0.46        | -0.46       | -0.95       | -1.12        | 1.35         |
| 2.85        | -0.18        | -1.70        | 0.21        | 1.81        | 2.84         | 0.79         |
| -0.78       | 0.24         | -0.54        | -0.42       | 0.20        | -0.09        | -0.86        |
| -0.85       | 2.38         | -0.83        | -0.42       | 1.91        | 0.59         | -1.21        |
| -0.83       | 0.06         | -0.71        | -0.40       | 0.69        | -0.77        | -0.90        |
| -1.06       | -0.21        | 0.46         | -0.28       | -1.00       | -0.80        | 1.71         |
| -0.90       | -0.70        | -0.03        | -0.10       | -1.21       | 0.17         | -0.28        |
| 0.15        | -0.74        | 0.84         | 0.49        | -0.98       | 1.04         | 0.74         |
| -0.87       | -0.74        | -0.82        | -0.41       | 1.97        | -1.08        | -1.29        |
| 0.89        | -1.19        | -0.43        | -0.43       | -0.38       | 1.46         | 0.27         |
| -0.94       | 0.34         | -0.66        | -0.19       | 0.36        | -0.46        | -0.96        |
| -0.19       | -0.46        | 1.68         | -0.26       | -0.34       | -0.59        | 0.26         |
| 1.67        | 0.03         | 0.81         | -0.25       | -0.28       | 2.25         | 0.68         |
| 0.05        | -0.29        | 2.72         | -0.19       | -0.15       | 0.04         | 0.36         |
| 0.35        | 1.15         | 0.37         | -0.34       | 1.42        | 1.06         | 0.82         |
| 0.53        | -0.76        | 1.04         | -0.31       | -0.88       | -0.57        | -1.07        |
| 1.56        | -1.14        | 0.09         | -0.19       | -0.79       | -0.85        | 0.90         |

|       |       |       |       |       |       |       |
|-------|-------|-------|-------|-------|-------|-------|
| -0.42 | -0.75 | -0.77 | -0.31 | -0.75 | -0.28 | -0.60 |
| -0.14 | 2.50  | 0.36  | -0.11 | 1.07  | -0.56 | -0.83 |
| -0.16 | 0.18  | 0.33  | -0.27 | 0.67  | -0.03 | -0.34 |
| -0.79 | -0.12 | 0.07  | -0.33 | 0.57  | -0.11 | -0.98 |
| 0.00  | 0.76  | -1.63 | 0.78  | 0.10  | -0.22 | -0.84 |
| 1.88  | 0.06  | -0.04 | -0.03 | 0.62  | 0.45  | -0.50 |
| -0.02 | 0.13  | 1.27  | 0.07  | -0.86 | -0.90 | 0.09  |
| 0.53  | -0.73 | -0.61 | -0.43 | -1.22 | -1.07 | 2.43  |
| 1.60  | 0.01  | 1.06  | -0.11 | -1.10 | -0.73 | -0.36 |
| -0.40 | -0.81 | 0.22  | -0.07 | -1.14 | -1.05 | -0.79 |
| -1.23 | 0.08  | -1.37 | 1.65  | -1.10 | -0.81 | -0.67 |
| -0.68 | 0.39  | -1.44 | 0.59  | -1.26 | -1.08 | -0.27 |
| 3.83  | -0.66 | -1.73 | 2.03  | 0.42  | 1.72  | 4.17  |
| -0.48 | -0.02 | -0.75 | -0.51 | 0.45  | -0.49 | -0.84 |
| -0.41 | -0.34 | -0.96 | -0.45 | -0.20 | 0.51  | -0.40 |
| 0.51  | -1.09 | -0.58 | -0.44 | -0.06 | 0.03  | -0.52 |
| -1.29 | -0.78 | -1.24 | -0.48 | 0.37  | -1.06 | -1.15 |
| -0.50 | 0.85  | -0.67 | -0.43 | -1.13 | 2.57  | -1.35 |
| 0.80  | -0.17 | -0.71 | -0.28 | -1.07 | 2.06  | -0.10 |
| 0.79  | -0.62 | -0.34 | -0.39 | -0.29 | -0.17 | 0.33  |
| -0.82 | 0.48  | 2.99  | -0.07 | 1.74  | -0.47 | -1.18 |
| -0.92 | 2.56  | 5.49  | 1.30  | 3.41  | 0.73  | -0.05 |
| -0.09 | 0.10  | 0.07  | -0.09 | 0.19  | 0.17  | -0.55 |
| 0.79  | -0.81 | 1.14  | -0.20 | -0.68 | 0.30  | -0.62 |
| -0.65 | -0.15 | -0.17 | -0.21 | 0.48  | -0.58 | -1.57 |
| -1.11 | -0.40 | 2.21  | -0.32 | 1.62  | -0.96 | -1.57 |
| 5.19  | -0.81 | 0.78  | -0.14 | -0.90 | -0.37 | 1.61  |
| 0.73  | 0.72  | 0.13  | -0.39 | 0.18  | 0.33  | -0.53 |
| 0.53  | -1.14 | -0.12 | -0.30 | -0.50 | -0.26 | 0.10  |
| 2.18  | -0.19 | 0.15  | -0.41 | -0.63 | -0.58 | 0.30  |
| 1.43  | 0.64  | -0.15 | -0.37 | -0.65 | 0.52  | 0.43  |
| 0.38  | 3.15  | 0.53  | 0.21  | 0.09  | 1.11  | -0.98 |
| -0.70 | 2.14  | -0.02 | 0.42  | -0.23 | 0.63  | -0.84 |
| 1.66  | -0.22 | 0.52  | -0.02 | 0.40  | 0.65  | -0.12 |
| -0.36 | -0.61 | -0.44 | -0.20 | -0.02 | -0.66 | -0.88 |
| 0.14  | 1.11  | 0.68  | 0.53  | -0.53 | -0.05 | -0.37 |
| 0.03  | 4.04  | -0.34 | 0.32  | -0.67 | -0.35 | 0.15  |
| 2.18  | -1.23 | -0.28 | -0.27 | -0.92 | -0.92 | 0.44  |
| 0.74  | 1.27  | -0.83 | -0.21 | 0.46  | -0.58 | -0.96 |
| 3.60  | -0.71 | -1.50 | -0.22 | 0.74  | 0.53  | 0.37  |
| 5.59  | 2.18  | -1.52 | -0.03 | 0.38  | 0.52  | 0.46  |
| 0.90  | -0.59 | 0.07  | -0.29 | -1.10 | -1.15 | 1.17  |
| -0.39 | -0.98 | 0.87  | 0.28  | -0.20 | -1.03 | -0.59 |
| 0.23  | -0.20 | 1.22  | 0.16  | -0.09 | -0.89 | -0.59 |
| 0.01  | -1.20 | 1.34  | -0.18 | -0.88 | -1.09 | 0.92  |
| -0.88 | -0.30 | -0.27 | -0.49 | 0.99  | -1.24 | -0.61 |
| -0.02 | -0.76 | -0.20 | -0.38 | -1.41 | -0.42 | 1.21  |
| -0.31 | -0.92 | -1.76 | 2.88  | -1.39 | 0.33  | -1.21 |
| -0.20 | 1.12  | -1.68 | -0.44 | 0.89  | -0.04 | 3.19  |
| 2.06  | 1.53  | -1.58 | -0.33 | 0.34  | -0.53 | 4.29  |
| -0.52 | 0.04  | -0.68 | -0.41 | -0.49 | -1.06 | -0.47 |
| 0.35  | -0.47 | -1.39 | -0.54 | -1.21 | -1.16 | -1.73 |
| -0.57 | -0.81 | -0.38 | -0.40 | -0.74 | -0.37 | 1.62  |
| -0.20 | 0.31  | -0.90 | -0.43 | -0.23 | 0.03  | -0.35 |
| -0.75 | 1.19  | 2.88  | -0.14 | 4.02  | 0.68  | -1.18 |
| 0.61  | 1.10  | -0.24 | -0.41 | 0.18  | -0.44 | 0.22  |
| 0.21  | -0.78 | -0.29 | -0.16 | -1.01 | -0.61 | -1.14 |
| -0.77 | 1.67  | -0.56 | -0.17 | -0.85 | -0.74 | -1.67 |
| 2.76  | -0.74 | 0.96  | -0.32 | -1.00 | 0.64  | 3.01  |

|       |       |       |       |       |       |       |
|-------|-------|-------|-------|-------|-------|-------|
| 3.63  | -1.04 | 1.41  | -0.12 | -1.02 | 0.02  | 1.12  |
| 0.20  | -1.27 | 0.70  | 0.18  | -0.71 | -0.24 | 1.18  |
| 2.88  | -0.40 | -0.18 | -0.27 | -0.84 | -0.36 | 1.02  |
| -0.08 | -0.37 | -0.12 | -0.32 | 0.87  | -0.33 | -0.72 |
| 1.23  | -0.45 | 0.09  | 0.21  | -0.90 | 0.53  | 0.55  |
| 0.49  | -0.90 | -0.38 | -0.42 | -1.28 | -1.10 | 0.99  |
| 1.27  | -1.01 | 0.28  | -0.01 | -0.48 | -0.09 | 0.42  |
| 2.79  | -0.59 | 0.25  | -0.36 | -0.64 | -0.33 | 0.25  |
| 0.99  | -1.22 | -0.30 | -0.36 | -0.99 | -0.55 | 1.41  |
| 0.92  | -0.94 | 0.40  | -0.40 | -0.73 | -0.55 | -0.56 |
| 2.22  | -0.96 | -0.11 | 0.19  | -0.32 | -0.17 | 0.81  |
| 0.16  | 0.35  | -0.12 | -0.35 | -0.62 | -1.14 | -0.04 |
| -0.28 | -0.31 | -0.57 | -0.33 | -1.01 | -0.74 | -1.21 |
| 0.04  | 1.29  | 0.53  | -0.20 | 0.54  | -0.60 | -0.01 |
| -0.03 | -0.97 | 1.73  | 0.03  | -1.06 | -0.53 | -0.68 |
| 0.32  | -0.17 | 2.33  | -0.03 | -1.04 | 0.31  | -0.27 |

|      |      |      |      |      |      |      |
|------|------|------|------|------|------|------|
| 1    | -2   | -1   | -1   | -1   | 0    | 1    |
| 0.00 | 0.00 | 0.00 | 0.00 | 0.00 | 0.00 | 0.00 |
| 1.00 | 1.00 | 1.00 | 1.00 | 1.00 | 1.00 | 1.00 |
| 0.97 | 0.17 | 0.53 | 0.33 | 0.36 | 0.12 | 0.16 |

| 75          | 76           | 77           | 78          | 79          | 80           | 81           |
|-------------|--------------|--------------|-------------|-------------|--------------|--------------|
| TAGCACCATCT | GAATGTTGCTCG | ATGCACCTGGGC | CACCCGTAGAA | TGCGGGGCTAG | ATCACATTGCCA | AATTGCACGGTA |
| miR-29a-3p  | miR-409-3p   | miR-500a-3p  | miR-99b-5p  | miR-744-5p  | miR-23b-3p   | miR-363-3p   |
| 67482       | 67182        | 65049        | 56245       | 56410       | 53026        | 52323        |
| -0.31       | 1.96         | 0.19         | -0.29       | -0.65       | 0.09         | -0.38        |
| -0.98       | -1.03        | -1.38        | 4.80        | -1.18       | -0.50        | 0.32         |
| -0.02       | -0.56        | -0.24        | -0.35       | -1.00       | -1.08        | 2.78         |
| -0.65       | -0.95        | -0.46        | -0.46       | -0.95       | -1.12        | 1.35         |
| 2.85        | -0.18        | -1.70        | 0.21        | 1.81        | 2.84         | 0.79         |
| -0.78       | 0.24         | -0.54        | -0.42       | 0.20        | -0.09        | -0.86        |
| -0.85       | 2.38         | -0.83        | -0.42       | 1.91        | 0.59         | -1.21        |
| -0.83       | 0.06         | -0.71        | -0.40       | 0.69        | -0.77        | -0.90        |
| -1.06       | -0.21        | 0.46         | -0.28       | -1.00       | -0.80        | 1.71         |
| -0.90       | -0.70        | -0.03        | -0.10       | -1.21       | 0.17         | -0.28        |
| 0.15        | -0.74        | 0.84         | 0.49        | -0.98       | 1.04         | 0.74         |
| -0.87       | -0.74        | -0.82        | -0.41       | 1.97        | -1.08        | -1.29        |
| 0.89        | -1.19        | -0.43        | -0.43       | -0.38       | 1.46         | 0.27         |
| -0.94       | 0.34         | -0.66        | -0.19       | 0.36        | -0.46        | -0.96        |
| -0.19       | -0.46        | 1.68         | -0.26       | -0.34       | -0.59        | 0.26         |
| 1.67        | 0.03         | 0.81         | -0.25       | -0.28       | 2.25         | 0.68         |
| 0.05        | -0.29        | 2.72         | -0.19       | -0.15       | 0.04         | 0.36         |
| 0.35        | 1.15         | 0.37         | -0.34       | 1.42        | 1.06         | 0.82         |
| 0.53        | -0.76        | 1.04         | -0.31       | -0.88       | -0.57        | -1.07        |
| 1.56        | -1.14        | 0.09         | -0.19       | -0.79       | -0.85        | 0.90         |
| -0.42       | -0.75        | -0.77        | -0.31       | -0.75       | -0.28        | -0.60        |
| -0.14       | 2.50         | 0.36         | -0.11       | 1.07        | -0.56        | -0.83        |
| -0.16       | 0.18         | 0.33         | -0.27       | 0.67        | -0.03        | -0.34        |
| -0.79       | -0.12        | 0.07         | -0.33       | 0.57        | -0.11        | -0.98        |
| 0.00        | 0.76         | -1.63        | 0.78        | 0.10        | -0.22        | -0.84        |
| 1.88        | 0.06         | -0.04        | -0.03       | 0.62        | 0.45         | -0.50        |
| -0.02       | 0.13         | 1.27         | 0.07        | -0.86       | -0.90        | 0.09         |
| 0.53        | -0.73        | -0.61        | -0.43       | -1.22       | -1.07        | 2.43         |



|       |       |       |       |       |       |       |
|-------|-------|-------|-------|-------|-------|-------|
| 1.60  | 0.01  | 1.06  | -0.11 | -1.10 | -0.73 | -0.36 |
| -0.40 | -0.81 | 0.22  | -0.07 | -1.14 | -1.05 | -0.79 |
| -1.23 | 0.08  | -1.37 | 1.65  | -1.10 | -0.81 | -0.67 |
| -0.68 | 0.39  | -1.44 | 0.59  | -1.26 | -1.08 | -0.27 |
| 3.83  | -0.66 | -1.73 | 2.03  | 0.42  | 1.72  | 4.17  |
| -0.48 | -0.02 | -0.75 | -0.51 | 0.45  | -0.49 | -0.84 |
| -0.41 | -0.34 | -0.96 | -0.45 | -0.20 | 0.51  | -0.40 |
| 0.51  | -1.09 | -0.58 | -0.44 | -0.06 | 0.03  | -0.52 |
| -1.29 | -0.78 | -1.24 | -0.48 | 0.37  | -1.06 | -1.15 |
| -0.50 | 0.85  | -0.67 | -0.43 | -1.13 | 2.57  | -1.35 |
| 0.80  | -0.17 | -0.71 | -0.28 | -1.07 | 2.06  | -0.10 |
| 0.79  | -0.62 | -0.34 | -0.39 | -0.29 | -0.17 | 0.33  |
| -0.82 | 0.48  | 2.99  | -0.07 | 1.74  | -0.47 | -1.18 |
| -0.92 | 2.56  | 5.49  | 1.30  | 3.41  | 0.73  | -0.05 |
| -0.09 | 0.10  | 0.07  | -0.09 | 0.19  | 0.17  | -0.55 |
| 0.79  | -0.81 | 1.14  | -0.20 | -0.68 | 0.30  | -0.62 |
| -0.65 | -0.15 | -0.17 | -0.21 | 0.48  | -0.58 | -1.57 |
| -1.11 | -0.40 | 2.21  | -0.32 | 1.62  | -0.96 | -1.57 |
| 5.19  | -0.81 | 0.78  | -0.14 | -0.90 | -0.37 | 1.61  |
| 0.73  | 0.72  | 0.13  | -0.39 | 0.18  | 0.33  | -0.53 |
| 0.53  | -1.14 | -0.12 | -0.30 | -0.50 | -0.26 | 0.10  |
| 2.18  | -0.19 | 0.15  | -0.41 | -0.63 | -0.58 | 0.30  |
| 1.43  | 0.64  | -0.15 | -0.37 | -0.65 | 0.52  | 0.43  |
| 0.38  | 3.15  | 0.53  | 0.21  | 0.09  | 1.11  | -0.98 |
| -0.70 | 2.14  | -0.02 | 0.42  | -0.23 | 0.63  | -0.84 |
| 1.66  | -0.22 | 0.52  | -0.02 | 0.40  | 0.65  | -0.12 |
| -0.36 | -0.61 | -0.44 | -0.20 | -0.02 | -0.66 | -0.88 |
| 0.14  | 1.11  | 0.68  | 0.53  | -0.53 | -0.05 | -0.37 |
| 0.03  | 4.04  | -0.34 | 0.32  | -0.67 | -0.35 | 0.15  |
| 2.18  | -1.23 | -0.28 | -0.27 | -0.92 | -0.92 | 0.44  |
| 0.74  | 1.27  | -0.83 | -0.21 | 0.46  | -0.58 | -0.96 |
| 3.60  | -0.71 | -1.50 | -0.22 | 0.74  | 0.53  | 0.37  |
| 5.59  | 2.18  | -1.52 | -0.03 | 0.38  | 0.52  | 0.46  |
| 0.90  | -0.59 | 0.07  | -0.29 | -1.10 | -1.15 | 1.17  |
| -0.39 | -0.98 | 0.87  | 0.28  | -0.20 | -1.03 | -0.59 |
| 0.23  | -0.20 | 1.22  | 0.16  | -0.09 | -0.89 | -0.59 |
| 0.01  | -1.20 | 1.34  | -0.18 | -0.88 | -1.09 | 0.92  |
| -0.88 | -0.30 | -0.27 | -0.49 | 0.99  | -1.24 | -0.61 |
| -0.02 | -0.76 | -0.20 | -0.38 | -1.41 | -0.42 | 1.21  |
| -0.31 | -0.92 | -1.76 | 2.88  | -1.39 | 0.33  | -1.21 |
| -0.20 | 1.12  | -1.68 | -0.44 | 0.89  | -0.04 | 3.19  |
| 2.06  | 1.53  | -1.58 | -0.33 | 0.34  | -0.53 | 4.29  |
| -0.52 | 0.04  | -0.68 | -0.41 | -0.49 | -1.06 | -0.47 |
| 0.35  | -0.47 | -1.39 | -0.54 | -1.21 | -1.16 | -1.73 |
| -0.57 | -0.81 | -0.38 | -0.40 | -0.74 | -0.37 | 1.62  |
| -0.20 | 0.31  | -0.90 | -0.43 | -0.23 | 0.03  | -0.35 |
| -0.75 | 1.19  | 2.88  | -0.14 | 4.02  | 0.68  | -1.18 |
| 0.61  | 1.10  | -0.24 | -0.41 | 0.18  | -0.44 | 0.22  |
| 0.21  | -0.78 | -0.29 | -0.16 | -1.01 | -0.61 | -1.14 |
| -0.77 | 1.67  | -0.56 | -0.17 | -0.85 | -0.74 | -1.67 |
| 2.76  | -0.74 | 0.96  | -0.32 | -1.00 | 0.64  | 3.01  |
| 3.63  | -1.04 | 1.41  | -0.12 | -1.02 | 0.02  | 1.12  |
| 0.20  | -1.27 | 0.70  | 0.18  | -0.71 | -0.24 | 1.18  |
| 2.88  | -0.40 | -0.18 | -0.27 | -0.84 | -0.36 | 1.02  |
| -0.08 | -0.37 | -0.12 | -0.32 | 0.87  | -0.33 | -0.72 |
| 1.23  | -0.45 | 0.09  | 0.21  | -0.90 | 0.53  | 0.55  |
| 0.49  | -0.90 | -0.38 | -0.42 | -1.28 | -1.10 | 0.99  |
| 1.27  | -1.01 | 0.28  | -0.01 | -0.48 | -0.09 | 0.42  |
| 2.79  | -0.59 | 0.25  | -0.36 | -0.64 | -0.33 | 0.25  |

|       |       |       |       |       |       |       |
|-------|-------|-------|-------|-------|-------|-------|
| 0.99  | -1.22 | -0.30 | -0.36 | -0.99 | -0.55 | 1.41  |
| 0.92  | -0.94 | 0.40  | -0.40 | -0.73 | -0.55 | -0.56 |
| 2.22  | -0.96 | -0.11 | 0.19  | -0.32 | -0.17 | 0.81  |
| 0.16  | 0.35  | -0.12 | -0.35 | -0.62 | -1.14 | -0.04 |
| -0.28 | -0.31 | -0.57 | -0.33 | -1.01 | -0.74 | -1.21 |
| 0.04  | 1.29  | 0.53  | -0.20 | 0.54  | -0.60 | -0.01 |
| -0.03 | -0.97 | 1.73  | 0.03  | -1.06 | -0.53 | -0.68 |
| 0     | 0     | 2     | 0     | -1    | 0     | 0     |

---

| 75          | 76           | 77           | 78          | 79          | 80           | 81            |
|-------------|--------------|--------------|-------------|-------------|--------------|---------------|
| 32          | 99           | 2            | 87          | 132         | 44           | 128           |
| AGAGGTAGTAG | TGCCCTGTGGAC | CAACGGAATCCC | CTGGCCCTCTC | CCTGTTCTCCA | CTGACCTATGAA | TGAGCGCCTCGAC |
| let-7d-5p   | miR-146b-3p  | miR-191-5p   | miR-328     | miR-26b-3p  | miR-192-5p   | miR-339-3p    |
| 463804      | 27199        | 10497180     | 48416       | 11100       | 248983       | 12315.00      |
| -0.85       | -0.05        | -0.77        | -0.41       | -0.35       | -0.83        | 0.88          |
| -1.63       | 2.39         | 3.44         | 0.21        | -1.72       | 1.81         | -1.52         |
| 0.95        | -0.05        | -0.58        | -1.05       | -0.62       | 0.07         | -0.69         |
| 0.18        | -0.45        | -0.72        | -1.30       | -0.69       | -0.61        | -0.69         |
| 1.13        | 1.49         | 0.71         | 1.15        | -0.58       | -0.23        | -1.02         |
| -0.56       | -1.03        | -0.50        | 0.60        | 0.02        | -0.70        | -0.78         |
| -0.06       | -0.60        | -0.74        | 1.82        | -0.64       | -0.79        | 0.66          |
| -0.05       | -0.43        | -0.53        | 2.04        | 0.34        | -0.79        | 0.73          |
| -0.90       | -1.26        | -0.06        | 0.12        | -1.16       | 0.01         | -1.17         |
| -1.10       | -1.14        | -0.19        | -1.15       | -1.32       | 1.07         | -1.20         |
| -0.72       | 0.08         | 0.29         | -0.32       | -0.95       | 1.19         | -1.17         |
| 0.89        | -0.45        | -0.81        | 0.75        | 0.86        | -0.72        | -0.11         |
| -0.36       | -1.03        | -0.57        | -1.36       | 2.27        | 1.93         | 1.27          |
| 0.57        | 0.04         | -0.55        | 0.66        | -0.78       | -0.73        | 0.43          |
| -0.64       | -0.85        | 0.07         | -1.10       | 0.14        | -0.32        | 0.01          |
| -0.85       | -0.77        | -0.14        | 0.56        | 1.20        | 0.13         | 0.44          |
| 0.45        | 0.98         | -0.02        | 0.21        | 0.27        | -0.76        | 0.68          |
| -0.56       | -0.80        | -0.53        | -0.40       | 1.60        | 0.19         | 2.47          |
| -1.27       | 0.03         | 0.88         | -0.55       | 0.73        | 0.00         | -0.04         |
| -0.49       | -0.75        | -0.49        | -1.30       | 0.91        | 2.41         | -0.29         |
| -0.99       | 0.13         | -0.47        | 0.69        | -0.73       | -0.56        | -0.16         |
| 2.08        | 1.01         | -0.34        | 0.26        | 1.83        | -0.83        | 1.08          |
| 1.72        | 1.26         | -0.34        | 0.43        | 0.06        | -0.70        | 1.28          |
| 0.64        | 0.74         | -0.55        | 1.54        | -1.05       | -0.76        | 1.08          |
| 1.86        | 0.24         | 2.64         | 0.01        | -0.25       | -0.55        | -1.52         |
| 0.79        | 2.14         | 0.82         | -0.52       | 0.23        | -0.69        | -0.35         |
| -0.24       | -0.86        | 0.06         | -1.57       | 0.38        | 1.77         | -0.33         |
| -0.53       | -1.28        | -0.73        | -1.88       | -0.88       | 4.11         | -0.78         |
| -1.63       | 1.91         | -0.02        | -0.87       | 1.54        | 0.22         | -0.78         |
| -1.96       | 0.47         | 0.40         | -0.30       | -1.02       | 0.63         | -0.82         |
| -1.42       | -0.50        | 0.80         | 2.91        | -1.49       | -0.21        | -1.07         |
| -1.43       | 1.46         | 1.55         | -0.94       | 0.10        | 5.41         | -0.91         |
| 0.82        | -1.02        | 0.91         | -0.38       | 1.95        | 2.62         | -1.40         |
| -0.47       | -1.10        | -0.55        | 0.67        | 0.32        | -0.69        | -0.44         |
| -0.80       | -0.75        | -0.20        | 1.05        | 0.71        | -0.30        | -0.04         |
| -0.13       | 0.43         | -0.61        | -0.18       | -0.27       | -0.75        | 0.23          |
| -0.21       | -1.20        | -0.85        | 0.89        | -1.64       | -0.87        | -1.15         |
| -1.57       | 0.07         | -0.66        | -1.33       | -0.36       | 0.17         | -0.06         |
| -1.47       | -0.83        | -0.72        | -1.54       | 1.08        | 1.53         | -0.32         |

|       |       |       |       |       |       |       |
|-------|-------|-------|-------|-------|-------|-------|
| -0.21 | 1.32  | -0.26 | -0.88 | 1.10  | -0.48 | 0.57  |
| -1.15 | 3.26  | -0.64 | 8.00  | 1.35  | -0.67 | -0.12 |
| -0.81 | 3.64  | -0.61 | 35.18 | 4.10  | -0.52 | 1.11  |
| -0.61 | 0.34  | -0.28 | 1.26  | -0.14 | -0.80 | 0.44  |
| -1.62 | -0.84 | -0.14 | -0.62 | 1.29  | 0.01  | -0.15 |
| -1.22 | 1.95  | 0.28  | 2.34  | 2.78  | -0.61 | 0.95  |
| -1.54 | 2.12  | -0.78 | 8.03  | -0.33 | -0.83 | -0.67 |
| -0.61 | -0.07 | 0.36  | -0.96 | 0.87  | -0.31 | 0.34  |
| 0.24  | 0.49  | -0.28 | 0.88  | 0.78  | -0.71 | 0.82  |
| -1.08 | -0.59 | -0.29 | 0.41  | 0.55  | -0.46 | 0.46  |
| -0.67 | 0.32  | -0.37 | -0.35 | 0.17  | -0.71 | 1.06  |
| -1.13 | -0.04 | -0.31 | -0.37 | 1.61  | -0.34 | 1.25  |
| -0.18 | 0.43  | 0.20  | 1.29  | -0.19 | -0.82 | 0.50  |
| 0.68  | -0.62 | -0.06 | 0.08  | -0.94 | -0.82 | 0.00  |
| 0.07  | -0.38 | 0.14  | 0.25  | 1.43  | -0.65 | 0.88  |
| -0.03 | -0.36 | -0.21 | 1.79  | 0.22  | -0.76 | -0.24 |
| -0.02 | 0.29  | 0.14  | -0.46 | -0.84 | -0.80 | 0.18  |
| -0.72 | -0.43 | -0.27 | -0.04 | -0.08 | -0.67 | 0.30  |
| -0.21 | -1.05 | -0.61 | -1.92 | -0.20 | 3.52  | -0.75 |
| 0.87  | 3.02  | -0.03 | 0.25  | 0.52  | -0.79 | -0.12 |
| 0.79  | 1.40  | 0.48  | 0.39  | 2.99  | -0.09 | -0.44 |
| 0.83  | 1.84  | 0.42  | 0.17  | 1.83  | -0.05 | -0.94 |
| -0.46 | -1.26 | -0.54 | -1.83 | -0.63 | 5.44  | -1.01 |
| 0.84  | -0.24 | -0.22 | -0.46 | -0.15 | -0.78 | -0.88 |
| 1.27  | 0.05  | -0.32 | -0.53 | 0.43  | -0.59 | -0.37 |
| 0.68  | -0.63 | -0.10 | -1.78 | -0.83 | -0.16 | -1.07 |
| 0.49  | 0.13  | -0.81 | -1.71 | 2.28  | 0.07  | -0.50 |
| -1.92 | -1.24 | -0.78 | -1.60 | -0.05 | 0.08  | -0.74 |
| -1.94 | 2.62  | 2.04  | -0.19 | 0.18  | 1.46  | -1.52 |
| 5.63  | 1.64  | -0.54 | 0.41  | 0.67  | -0.20 | -0.06 |
| 1.24  | 1.60  | -0.36 | 0.18  | 4.25  | -0.32 | 0.54  |
| -0.40 | -0.22 | -0.73 | -0.83 | 0.84  | -0.67 | 0.20  |
| -1.70 | -0.22 | -0.94 | -0.10 | 5.37  | 2.05  | -0.05 |
| 0.08  | -1.00 | -0.65 | -1.10 | -0.31 | 0.27  | -0.45 |
| 0.30  | -0.43 | -0.66 | -1.35 | 1.75  | 0.66  | 0.29  |
| -0.98 | 5.57  | -0.81 | 38.57 | 2.19  | -0.84 | 1.36  |
| -0.34 | -0.71 | -0.57 | -0.28 | 1.31  | -0.03 | -0.56 |
| -1.37 | 1.08  | 1.00  | -0.78 | 0.48  | 0.82  | -0.54 |
| -0.47 | 0.60  | 1.12  | 0.14  | 2.42  | 0.97  | 0.57  |
| -0.49 | -0.85 | 0.08  | -1.47 | -0.37 | 0.38  | -0.39 |
| -0.60 | -0.80 | 0.58  | -1.28 | 0.04  | -0.17 | -0.42 |
| -0.33 | -0.26 | 0.86  | -0.02 | -0.97 | -0.69 | -0.71 |
| -0.17 | -0.24 | 0.14  | -0.68 | 0.44  | -0.39 | 0.09  |
| -0.88 | 1.07  | -0.39 | 2.12  | 1.76  | -0.74 | 0.94  |
| -1.09 | -0.29 | -0.58 | -1.55 | 1.10  | 3.65  | -0.22 |
| -0.54 | -1.37 | -0.68 | -2.01 | -0.68 | 6.22  | -0.87 |
| -1.18 | 0.08  | -0.19 | -0.19 | 1.31  | -0.61 | 0.89  |
| -0.31 | -0.03 | -0.07 | -1.15 | 1.18  | -0.63 | 0.82  |
| -0.66 | -0.46 | -0.30 | -0.90 | 0.60  | -0.67 | -0.16 |
| -0.97 | -0.05 | 0.03  | -1.40 | 0.40  | 0.24  | 0.14  |
| -0.22 | 0.30  | 0.18  | -0.16 | 0.73  | -0.64 | 0.16  |
| 1.14  | -0.15 | -0.16 | -1.97 | -1.23 | 5.00  | -1.22 |
| -1.55 | 0.11  | -0.17 | 0.08  | -0.18 | -0.68 | -0.22 |
| 2.16  | 0.78  | -0.31 | 0.52  | 0.69  | -0.77 | 0.89  |
| -0.42 | -0.64 | 1.06  | -1.03 | -0.77 | -0.18 | -1.15 |
| -1.26 | 0.60  | -0.22 | -1.21 | 0.24  | -0.15 | -0.92 |
| 0.34  | 0.35  | 0.35  | 0.37  | 0.39  | 0.40  | 0.40  |
| 0.26  | 0.19  | 0.46  | 0.22  | 0.38  | 0.40  | 0.85  |











































































































































































4686947 1336672 1032612 1495548 331698 1653485 7479891

|          |         |         |         |        |         |          |
|----------|---------|---------|---------|--------|---------|----------|
| 85       | 86      | 87      | 88      | 89     | 90      | 91       |
| 16       | 17      | 18      | 19      | 20     | 21      | 22       |
| E_19     | E_21    | E_22    | E_23    | E_3    | E_46    | E_48     |
| CHR_P    | CHR_P   | CHR_P   | CHR_P   | CHR_P  | CHR_P   | CHR_P    |
| 11896438 | 2298032 | 4000500 | 2560098 | 527532 | 2489824 | 12852326 |
| 0.88     | 0.37    | 0.10    | 0.84    | 0.42   | 0.19    | 0.96     |
| E_19     | E_21    | E_22    | E_23    | E_3    | E_46    | E_48     |
| 7209491  | 961360  | 2967888 | 1064550 | 195834 | 836339  | 5372435  |
| 1091684  | 255189  | 377862  | 379984  | 124977 | 258293  | 997282   |
| 502157   | 213241  | 199130  | 172634  | 19968  | 62806   | 209441   |
| 164902   | 42264   | 34304   | 133004  | 68294  | 83643   | 138640   |
| 363634   | 74226   | 71113   | 112232  | 11484  | 53131   | 352710   |
| 168227   | 60585   | 62714   | 91720   | 29872  | 116972  | 246250   |
| 384358   | 159415  | 29437   | 72873   | 3409   | 169046  | 1441458  |
| 241542   | 120763  | 51665   | 110884  | 11308  | 108609  | 350839   |
| 170486   | 19447   | 3984    | 11486   | 855    | 206272  | 1126803  |
| 160818   | 59440   | 15638   | 37107   | 4040   | 72117   | 268023   |
| 146719   | 27738   | 16747   | 34871   | 1335   | 30042   | 179239   |
| 83057    | 11529   | 5049    | 21295   | 2197   | 21733   | 96561    |
| 78420    | 23046   | 18190   | 18821   | 6539   | 29913   | 90006    |
| 67728    | 14380   | 3469    | 31235   | 1127   | 21234   | 151565   |
| 47756    | 9645    | 16109   | 15141   | 2620   | 11470   | 56920    |
| 49746    | 11428   | 1692    | 13245   | 723    | 32632   | 240590   |
| 15960    | 7283    | 7002    | 9764    | 7497   | 11053   | 21272    |
| 68639    | 12706   | 1450    | 14569   | 432    | 21244   | 140819   |
| 68787    | 9163    | 4133    | 9311    | 1693   | 17088   | 56091    |
| 42508    | 12757   | 4006    | 9113    | 1012   | 15857   | 60966    |
| 22498    | 10337   | 5460    | 11379   | 1634   | 10414   | 23674    |
| 37407    | 8453    | 3170    | 8471    | 1321   | 11161   | 35615    |
| 37223    | 4087    | 3436    | 5650    | 671    | 5481    | 27571    |
| 26441    | 6142    | 2757    | 6541    | 768    | 9153    | 41399    |
| 43123    | 13258   | 2801    | 8605    | 361    | 15787   | 30680    |
| 41338    | 8570    | 1361    | 7492    | 350    | 19954   | 59425    |
| 35378    | 5537    | 4177    | 5771    | 1090   | 7670    | 26419    |
| 13570    | 2631    | 4416    | 4918    | 1441   | 4771    | 15113    |
| 12615    | 4758    | 2076    | 2971    | 210    | 8490    | 58871    |
| 28349    | 8096    | 4620    | 8607    | 1001   | 6149    | 36799    |
| 21739    | 5854    | 4227    | 7817    | 878    | 2975    | 12463    |
| 24465    | 8071    | 2430    | 5991    | 2016   | 9244    | 18471    |
| 13614    | 3701    | 3365    | 5191    | 787    | 3153    | 20715    |
| 22482    | 4396    | 1462    | 3296    | 542    | 16316   | 88289    |
| 9431     | 1539    | 315     | 1303    | 187    | 21344   | 86977    |
| 26556    | 7663    | 4366    | 8052    | 962    | 5712    | 33597    |
| 17481    | 3592    | 5270    | 4749    | 375    | 2813    | 12579    |
| 20296    | 4581    | 2089    | 2878    | 410    | 4251    | 16360    |
| 19821    | 8938    | 1413    | 7464    | 263    | 2794    | 14919    |
| 9234     | 1750    | 4360    | 5035    | 303    | 2132    | 5546     |
| 2083     | 1343    | 1343    | 1802    | 1161   | 1533    | 7478     |
| 6288     | 2100    | 2021    | 2809    | 461    | 2590    | 3516     |
| 8362     | 1914    | 1295    | 2664    | 966    | 3483    | 6831     |
| 15094    | 3308    | 3782    | 3872    | 735    | 2936    | 7229     |
| 7445     | 1250    | 307     | 1006    | 77     | 8899    | 63328    |
| 12184    | 3381    | 2185    | 4911    | 922    | 7026    | 7620     |



|       |      |      |      |      |      |       |
|-------|------|------|------|------|------|-------|
| 8964  | 2412 | 1302 | 3118 | 517  | 2193 | 5820  |
| 10643 | 3997 | 1868 | 2942 | 373  | 2509 | 8264  |
| 2285  | 887  | 1727 | 1377 | 1089 | 2514 | 4060  |
| 3209  | 249  | 142  | 737  | 55   | 7014 | 81989 |
| 3186  | 1092 | 221  | 537  | 337  | 9277 | 20102 |
| 6693  | 940  | 226  | 3241 | 320  | 843  | 1234  |
| 9428  | 2710 | 646  | 2436 | 221  | 3106 | 4450  |
| 5262  | 1015 | 1432 | 1345 | 139  | 1216 | 2965  |
| 3803  | 1802 | 434  | 1409 | 98   | 1507 | 5283  |
| 10682 | 2089 | 583  | 406  | 260  | 2310 | 14583 |
| 1912  | 105  | 56   | 159  | 42   | 8704 | 52418 |
| 6295  | 2142 | 1567 | 1409 | 163  | 1180 | 5085  |
| 7356  | 2196 | 1203 | 1553 | 392  | 2756 | 5368  |
| 4687  | 1156 | 368  | 1965 | 310  | 1606 | 2898  |
| 1394  | 1149 | 1634 | 1572 | 472  | 712  | 866   |
| 4365  | 807  | 446  | 987  | 131  | 1164 | 1891  |
| 4609  | 1215 | 630  | 910  | 301  | 2118 | 4266  |
| 2675  | 394  | 128  | 238  | 12   | 2919 | 19160 |
| 1293  | 226  | 118  | 235  | 27   | 6738 | 41406 |
| 832   | 225  | 565  | 622  | 220  | 332  | 2546  |
| 6500  | 838  | 323  | 732  | 83   | 1197 | 8508  |
| 4792  | 595  | 134  | 572  | 206  | 3920 | 12660 |
| 5083  | 392  | 158  | 326  | 41   | 1577 | 17584 |
| 5139  | 1069 | 333  | 801  | 103  | 1631 | 4640  |
| 4768  | 1358 | 1688 | 855  | 25   | 450  | 2545  |
| 1148  | 508  | 530  | 523  | 528  | 610  | 930   |
| 1909  | 353  | 577  | 485  | 231  | 456  | 1742  |
| 3695  | 594  | 77   | 635  | 25   | 1907 | 11559 |
| 3930  | 566  | 218  | 505  | 63   | 929  | 3626  |
| 4700  | 1642 | 406  | 1573 | 107  | 1008 | 3297  |
| 1158  | 185  | 57   | 566  | 131  | 563  | 1374  |
| 3160  | 1065 | 650  | 596  | 139  | 735  | 2498  |
| 1282  | 676  | 901  | 513  | 93   | 1403 | 1156  |
| 936   | 263  | 315  | 385  | 279  | 374  | 789   |
| 3055  | 613  | 391  | 500  | 116  | 987  | 660   |
| 3718  | 680  | 546  | 745  | 76   | 665  | 3532  |
| 1928  | 367  | 453  | 524  | 241  | 428  | 864   |
| 1251  | 391  | 610  | 539  | 141  | 204  | 1466  |
| 1104  | 241  | 54   | 164  | 162  | 2150 | 5159  |
| 6239  | 1194 | 447  | 866  | 40   | 965  | 3665  |
| 3066  | 404  | 328  | 350  | 90   | 715  | 827   |
| 818   | 275  | 419  | 448  | 245  | 261  | 684   |
| 1568  | 529  | 74   | 245  | 27   | 1080 | 5400  |
| 1279  | 438  | 117  | 537  | 77   | 618  | 1873  |
| 608   | 424  | 321  | 389  | 75   | 209  | 579   |
| 1204  | 375  | 173  | 445  | 83   | 460  | 784   |
| 460   | 25   | 16   | 54   | 6    | 1799 | 17637 |
| 1169  | 347  | 303  | 654  | 106  | 437  | 1639  |
| 2372  | 686  | 176  | 341  | 68   | 450  | 1658  |
| 1641  | 240  | 69   | 207  | 20   | 892  | 6124  |
| 649   | 453  | 68   | 278  | 85   | 668  | 1795  |
| 364   | 206  | 198  | 274  | 104  | 151  | 343   |
| 518   | 141  | 188  | 202  | 121  | 229  | 661   |
| 534   | 162  | 201  | 292  | 122  | 296  | 358   |
| 916   | 152  | 23   | 88   | 11   | 540  | 4941  |
| 2445  | 174  | 178  | 181  | 7    | 259  | 414   |
| 931   | 611  | 323  | 496  | 72   | 318  | 1011  |
| 394   | 130  | 87   | 294  | 127  | 309  | 423   |
| 1789  | 440  | 152  | 296  | 19   | 395  | 1224  |

|      |     |     |     |    |     |      |
|------|-----|-----|-----|----|-----|------|
| 876  | 229 | 97  | 144 | 30 | 436 | 2474 |
| 1251 | 126 | 35  | 98  | 9  | 733 | 3901 |
| 726  | 176 | 126 | 218 | 88 | 274 | 292  |
| 1460 | 525 | 192 | 478 | 47 | 341 | 677  |
| 1264 | 154 | 58  | 124 | 34 | 596 | 3702 |
| 1129 | 126 | 75  | 120 | 20 | 559 | 2947 |
| 1499 | 285 | 70  | 249 | 28 | 595 | 1928 |
| 601  | 168 | 131 | 213 | 59 | 251 | 447  |
| 425  | 102 | 50  | 110 | 49 | 203 | 140  |
| 1745 | 130 | 107 | 133 | 14 | 235 | 2359 |
| 620  | 114 | 124 | 160 | 60 | 427 | 1010 |
| 579  | 108 | 85  | 134 | 17 | 188 | 376  |
| 625  | 250 | 230 | 96  | 41 | 200 | 653  |
| 666  | 197 | 26  | 185 | 25 | 341 | 849  |
| 666  | 197 | 26  | 185 | 25 | 341 | 849  |
| 853  | 134 | 88  | 111 | 14 | 309 | 178  |
| 569  | 99  | 137 | 140 | 53 | 191 | 326  |
| 387  | 62  | 72  | 129 | 65 | 114 | 236  |
| 936  | 99  | 10  | 188 | 25 | 313 | 1198 |
| 441  | 169 | 68  | 116 | 33 | 316 | 625  |
| 137  | 21  | 5   | 28  | 6  | 913 | 3914 |
| 171  | 93  | 84  | 115 | 52 | 117 | 245  |
| 605  | 140 | 171 | 228 | 23 | 133 | 224  |
| 310  | 87  | 50  | 143 | 49 | 121 | 278  |
| 585  | 158 | 248 | 147 | 18 | 61  | 161  |
| 385  | 71  | 148 | 84  | 7  | 31  | 176  |
| 309  | 86  | 91  | 70  | 11 | 466 | 1273 |
| 245  | 92  | 31  | 127 | 46 | 174 | 294  |
| 757  | 261 | 84  | 127 | 18 | 127 | 303  |
| 522  | 124 | 139 | 128 | 15 | 118 | 205  |
| 885  | 101 | 30  | 85  | 14 | 171 | 1564 |
| 481  | 126 | 60  | 116 | 23 | 129 | 216  |
| 627  | 96  | 70  | 142 | 7  | 143 | 860  |
| 653  | 58  | 68  | 54  | 22 | 195 | 642  |
| 635  | 128 | 59  | 131 | 12 | 140 | 1010 |
| 318  | 99  | 57  | 112 | 20 | 106 | 241  |
| 353  | 141 | 100 | 94  | 28 | 135 | 395  |
| 370  | 103 | 102 | 119 | 27 | 128 | 297  |
| 81   | 31  | 21  | 39  | 46 | 66  | 181  |
| 318  | 130 | 66  | 99  | 24 | 122 | 402  |
| 130  | 8   | 5   | 21  | 1  | 319 | 2105 |
| 221  | 26  | 60  | 59  | 25 | 37  | 341  |
| 115  | 50  | 49  | 74  | 42 | 87  | 86   |
| 341  | 216 | 38  | 133 | 29 | 161 | 404  |
| 97   | 60  | 46  | 55  | 24 | 37  | 168  |
| 422  | 68  | 60  | 91  | 18 | 91  | 192  |
| 241  | 95  | 29  | 81  | 3  | 309 | 530  |
| 456  | 38  | 28  | 42  | 11 | 135 | 864  |
| 324  | 39  | 2   | 59  | 13 | 379 | 759  |
| 127  | 66  | 68  | 105 | 31 | 55  | 159  |
| 97   | 14  | 13  | 42  | 38 | 269 | 245  |
| 255  | 35  | 84  | 66  | 16 | 26  | 124  |
| 594  | 82  | 85  | 70  | 2  | 36  | 199  |
| 239  | 35  | 52  | 29  | 5  | 85  | 40   |
| 273  | 40  | 20  | 67  | 6  | 84  | 151  |
| 151  | 36  | 42  | 80  | 8  | 54  | 271  |
| 71   | 10  | 4   | 8   | 0  | 373 | 1934 |
| 209  | 61  | 39  | 62  | 16 | 79  | 74   |
| 193  | 39  | 68  | 77  | 18 | 47  | 161  |

|     |     |    |    |     |     |      |
|-----|-----|----|----|-----|-----|------|
| 209 | 41  | 8  | 46 | 3   | 139 | 640  |
| 419 | 108 | 31 | 94 | 5   | 108 | 284  |
| 83  | 34  | 50 | 53 | 35  | 46  | 116  |
| 415 | 59  | 69 | 93 | 11  | 53  | 147  |
| 31  | 10  | 12 | 10 | 25  | 266 | 33   |
| 178 | 47  | 12 | 37 | 5   | 307 | 1273 |
| 275 | 47  | 40 | 44 | 6   | 34  | 235  |
| 159 | 85  | 68 | 34 | 12  | 60  | 122  |
| 139 | 30  | 22 | 27 | 13  | 72  | 302  |
| 59  | 48  | 43 | 65 | 19  | 31  | 125  |
| 143 | 91  | 33 | 49 | 8   | 89  | 222  |
| 140 | 77  | 5  | 46 | 7   | 180 | 460  |
| 151 | 46  | 23 | 72 | 8   | 50  | 120  |
| 224 | 10  | 9  | 74 | 12  | 55  | 95   |
| 309 | 94  | 21 | 57 | 11  | 108 | 418  |
| 611 | 40  | 77 | 45 | 4   | 114 | 151  |
| 111 | 15  | 7  | 57 | 22  | 65  | 91   |
| 179 | 25  | 0  | 60 | 19  | 49  | 190  |
| 221 | 59  | 12 | 50 | 4   | 135 | 573  |
| 118 | 10  | 0  | 75 | 7   | 43  | 23   |
| 165 | 63  | 10 | 39 | 6   | 120 | 466  |
| 205 | 27  | 36 | 42 | 15  | 27  | 22   |
| 83  | 24  | 30 | 48 | 22  | 44  | 91   |
| 208 | 53  | 12 | 50 | 4   | 130 | 543  |
| 156 | 18  | 3  | 53 | 9   | 46  | 51   |
| 153 | 34  | 13 | 34 | 33  | 88  | 76   |
| 231 | 63  | 28 | 38 | 5   | 88  | 165  |
| 20  | 0   | 0  | 12 | 103 | 16  | 11   |
| 207 | 43  | 3  | 18 | 1   | 133 | 297  |
| 322 | 49  | 15 | 45 | 4   | 67  | 89   |
| 29  | 15  | 29 | 40 | 39  | 21  | 34   |
| 124 | 17  | 23 | 26 | 4   | 16  | 109  |
| 131 | 39  | 38 | 39 | 9   | 137 | 121  |
| 107 | 11  | 7  | 10 | 3   | 382 | 1148 |
| 124 | 25  | 25 | 20 | 8   | 45  | 237  |
| 268 | 30  | 14 | 33 | 4   | 60  | 64   |
| 39  | 21  | 17 | 40 | 2   | 38  | 235  |
| 114 | 66  | 70 | 64 | 4   | 19  | 109  |
| 63  | 93  | 17 | 24 | 9   | 31  | 57   |
| 93  | 22  | 31 | 51 | 2   | 17  | 108  |
| 144 | 17  | 25 | 53 | 6   | 13  | 61   |
| 314 | 16  | 11 | 22 | 2   | 114 | 551  |
| 94  | 19  | 0  | 57 | 10  | 31  | 46   |
| 83  | 31  | 43 | 34 | 12  | 26  | 170  |
| 116 | 37  | 16 | 36 | 9   | 35  | 70   |
| 136 | 17  | 23 | 50 | 19  | 7   | 17   |
| 88  | 8   | 26 | 28 | 9   | 40  | 190  |
| 91  | 37  | 41 | 40 | 5   | 26  | 73   |
| 91  | 66  | 34 | 19 | 10  | 34  | 48   |
| 173 | 26  | 0  | 50 | 3   | 185 | 489  |
| 102 | 17  | 25 | 17 | 5   | 16  | 64   |
| 95  | 15  | 4  | 11 | 21  | 55  | 356  |
| 49  | 47  | 20 | 29 | 11  | 29  | 56   |
| 149 | 61  | 27 | 44 | 4   | 26  | 140  |
| 100 | 33  | 12 | 38 | 2   | 62  | 120  |
| 45  | 3   | 0  | 2  | 2   | 64  | 1485 |
| 282 | 27  | 16 | 36 | 2   | 22  | 110  |
| 28  | 45  | 18 | 11 | 4   | 83  | 84   |
| 90  | 8   | 21 | 29 | 8   | 17  | 52   |

|     |    |    |    |    |     |     |
|-----|----|----|----|----|-----|-----|
| 168 | 46 | 30 | 27 | 10 | 57  | 178 |
| 96  | 7  | 19 | 10 | 4  | 38  | 41  |
| 45  | 11 | 0  | 37 | 5  | 33  | 34  |
| 49  | 7  | 15 | 33 | 7  | 35  | 40  |
| 46  | 9  | 9  | 25 | 10 | 17  | 60  |
| 39  | 6  | 22 | 11 | 19 | 27  | 67  |
| 70  | 26 | 25 | 21 | 3  | 16  | 37  |
| 191 | 26 | 29 | 29 | 4  | 24  | 76  |
| 121 | 20 | 7  | 15 | 2  | 47  | 166 |
| 90  | 13 | 31 | 24 | 10 | 15  | 67  |
| 66  | 11 | 3  | 11 | 0  | 53  | 598 |
| 46  | 17 | 10 | 18 | 7  | 14  | 29  |
| 121 | 23 | 9  | 16 | 8  | 23  | 179 |
| 78  | 16 | 28 | 28 | 2  | 20  | 54  |
| 126 | 6  | 21 | 27 | 7  | 68  | 47  |
| 89  | 10 | 4  | 28 | 1  | 73  | 163 |
| 64  | 35 | 6  | 16 | 4  | 30  | 84  |
| 44  | 17 | 10 | 21 | 6  | 29  | 66  |
| 77  | 7  | 1  | 22 | 2  | 25  | 59  |
| 237 | 33 | 16 | 17 | 3  | 31  | 112 |
| 112 | 29 | 4  | 16 | 0  | 48  | 259 |
| 173 | 57 | 26 | 17 | 4  | 26  | 75  |
| 173 | 57 | 26 | 17 | 4  | 26  | 75  |
| 47  | 8  | 0  | 24 | 6  | 11  | 14  |
| 33  | 9  | 11 | 11 | 2  | 6   | 62  |
| 94  | 15 | 16 | 20 | 5  | 42  | 117 |
| 68  | 13 | 2  | 41 | 6  | 42  | 52  |
| 82  | 29 | 11 | 48 | 6  | 40  | 89  |
| 47  | 14 | 12 | 23 | 7  | 12  | 32  |
| 125 | 10 | 3  | 20 | 4  | 25  | 90  |
| 52  | 15 | 19 | 15 | 2  | 1   | 78  |
| 54  | 19 | 10 | 27 | 2  | 26  | 54  |
| 30  | 34 | 4  | 11 | 3  | 20  | 51  |
| 18  | 8  | 17 | 3  | 0  | 10  | 50  |
| 74  | 12 | 4  | 6  | 7  | 70  | 54  |
| 135 | 21 | 22 | 24 | 3  | 18  | 55  |
| 20  | 0  | 0  | 2  | 0  | 68  | 499 |
| 102 | 15 | 9  | 21 | 6  | 12  | 47  |
| 85  | 31 | 2  | 35 | 1  | 12  | 61  |
| 31  | 7  | 15 | 20 | 6  | 11  | 44  |
| 29  | 13 | 7  | 20 | 5  | 10  | 40  |
| 81  | 30 | 2  | 34 | 1  | 11  | 55  |
| 23  | 11 | 9  | 10 | 5  | 6   | 13  |
| 73  | 26 | 28 | 11 | 1  | 8   | 46  |
| 82  | 8  | 5  | 9  | 5  | 23  | 105 |
| 51  | 14 | 9  | 15 | 4  | 13  | 44  |
| 5   | 0  | 2  | 0  | 0  | 100 | 584 |
| 17  | 5  | 10 | 20 | 3  | 12  | 22  |
| 44  | 8  | 10 | 11 | 5  | 6   | 26  |
| 34  | 3  | 6  | 18 | 4  | 16  | 57  |
| 20  | 2  | 3  | 20 | 5  | 15  | 17  |
| 33  | 9  | 11 | 12 | 1  | 16  | 79  |
| 18  | 0  | 0  | 2  | 0  | 53  | 562 |
| 151 | 14 | 14 | 21 | 2  | 11  | 28  |
| 52  | 11 | 0  | 16 | 0  | 18  | 51  |
| 0   | 0  | 0  | 0  | 0  | 0   | 0   |
| 34  | 7  | 4  | 11 | 2  | 6   | 34  |
| 21  | 11 | 9  | 18 | 8  | 10  | 14  |
| 65  | 11 | 9  | 12 | 0  | 6   | 21  |

|    |    |    |    |    |    |     |
|----|----|----|----|----|----|-----|
| 34 | 2  | 1  | 11 | 1  | 6  | 21  |
| 34 | 14 | 3  | 18 | 3  | 21 | 31  |
| 22 | 6  | 2  | 15 | 4  | 14 | 15  |
| 36 | 8  | 12 | 10 | 1  | 11 | 31  |
| 27 | 13 | 22 | 15 | 4  | 10 | 12  |
| 15 | 20 | 6  | 13 | 5  | 10 | 11  |
| 44 | 11 | 0  | 16 | 0  | 14 | 39  |
| 28 | 5  | 1  | 16 | 5  | 16 | 11  |
| 40 | 7  | 1  | 3  | 0  | 31 | 199 |
| 21 | 11 | 1  | 10 | 2  | 39 | 199 |
| 75 | 19 | 9  | 14 | 0  | 37 | 29  |
| 49 | 2  | 10 | 13 | 4  | 11 | 11  |
| 40 | 14 | 6  | 11 | 0  | 28 | 53  |
| 7  | 1  | 4  | 5  | 10 | 21 | 12  |
| 22 | 3  | 3  | 11 | 9  | 14 | 20  |
| 22 | 8  | 1  | 6  | 0  | 32 | 97  |
| 16 | 8  | 9  | 8  | 0  | 3  | 28  |
| 49 | 5  | 3  | 7  | 2  | 26 | 67  |
| 38 | 6  | 11 | 6  | 1  | 20 | 17  |
| 19 | 4  | 0  | 8  | 6  | 32 | 22  |
| 14 | 3  | 2  | 13 | 0  | 8  | 13  |
| 36 | 9  | 11 | 26 | 0  | 9  | 34  |
| 20 | 6  | 3  | 19 | 7  | 7  | 20  |
| 34 | 4  | 9  | 2  | 0  | 6  | 28  |
| 29 | 8  | 2  | 16 | 1  | 17 | 52  |
| 13 | 7  | 8  | 6  | 1  | 17 | 34  |
| 7  | 5  | 4  | 8  | 7  | 5  | 11  |
| 25 | 5  | 6  | 13 | 1  | 7  | 6   |
| 21 | 8  | 12 | 8  | 0  | 5  | 9   |
| 36 | 15 | 5  | 13 | 4  | 6  | 22  |
| 25 | 4  | 4  | 6  | 3  | 11 | 28  |
| 26 | 3  | 2  | 3  | 0  | 54 | 167 |
| 66 | 21 | 1  | 9  | 0  | 26 | 128 |
| 24 | 2  | 4  | 2  | 0  | 9  | 65  |
| 32 | 9  | 6  | 15 | 0  | 5  | 41  |
| 21 | 5  | 6  | 3  | 8  | 6  | 9   |
| 54 | 7  | 4  | 10 | 0  | 7  | 20  |
| 22 | 4  | 7  | 7  | 10 | 12 | 21  |
| 27 | 10 | 3  | 17 | 3  | 22 | 33  |
| 10 | 6  | 6  | 9  | 1  | 9  | 13  |
| 41 | 10 | 0  | 7  | 0  | 19 | 88  |
| 24 | 10 | 4  | 5  | 2  | 8  | 22  |
| 36 | 4  | 1  | 9  | 3  | 7  | 7   |
| 16 | 4  | 7  | 5  | 4  | 8  | 3   |
| 31 | 4  | 0  | 17 | 0  | 10 | 12  |
| 20 | 0  | 6  | 2  | 8  | 42 | 1   |
| 13 | 5  | 14 | 11 | 0  | 10 | 25  |
| 35 | 7  | 3  | 6  | 0  | 12 | 52  |
| 18 | 2  | 9  | 6  | 0  | 8  | 12  |
| 14 | 5  | 5  | 9  | 2  | 2  | 13  |
| 27 | 5  | 12 | 5  | 2  | 5  | 8   |
| 30 | 0  | 0  | 1  | 2  | 44 | 143 |
| 13 | 5  | 1  | 3  | 1  | 12 | 8   |
| 43 | 13 | 1  | 6  | 0  | 18 | 97  |
| 24 | 6  | 8  | 6  | 2  | 3  | 33  |
| 37 | 6  | 1  | 7  | 2  | 5  | 24  |
| 1  | 2  | 3  | 10 | 1  | 4  | 9   |
| 11 | 0  | 0  | 1  | 0  | 41 | 67  |
| 20 | 1  | 2  | 4  | 0  | 5  | 35  |

|    |    |    |    |   |    |     |
|----|----|----|----|---|----|-----|
| 18 | 8  | 9  | 12 | 1 | 7  | 11  |
| 4  | 3  | 4  | 12 | 4 | 7  | 6   |
| 29 | 4  | 3  | 8  | 1 | 6  | 45  |
| 16 | 6  | 11 | 6  | 6 | 3  | 10  |
| 5  | 6  | 6  | 9  | 3 | 8  | 8   |
| 9  | 1  | 5  | 10 | 1 | 7  | 12  |
| 27 | 4  | 2  | 2  | 2 | 1  | 11  |
| 13 | 2  | 1  | 1  | 0 | 34 | 113 |
| 33 | 9  | 0  | 9  | 0 | 3  | 34  |
| 23 | 8  | 3  | 8  | 0 | 10 | 9   |
| 16 | 4  | 5  | 3  | 2 | 2  | 4   |
| 18 | 8  | 3  | 8  | 1 | 9  | 34  |
| 15 | 3  | 4  | 11 | 0 | 1  | 12  |
| 14 | 0  | 2  | 1  | 1 | 66 | 65  |
| 26 | 15 | 12 | 0  | 2 | 6  | 8   |
| 42 | 4  | 1  | 2  | 0 | 10 | 22  |
| 20 | 3  | 2  | 5  | 0 | 15 | 15  |
| 14 | 3  | 3  | 7  | 0 | 5  | 13  |
| 29 | 3  | 2  | 6  | 0 | 19 | 55  |
| 36 | 2  | 5  | 4  | 1 | 4  | 10  |
| 29 | 4  | 1  | 5  | 1 | 12 | 34  |
| 8  | 7  | 3  | 3  | 1 | 4  | 15  |
| 27 | 6  | 3  | 9  | 0 | 9  | 13  |
| 7  | 4  | 3  | 7  | 1 | 1  | 11  |
| 26 | 3  | 4  | 7  | 0 | 2  | 17  |
| 24 | 1  | 3  | 5  | 2 | 4  | 8   |
| 15 | 0  | 0  | 3  | 1 | 19 | 51  |
| 10 | 3  | 0  | 5  | 1 | 16 | 59  |
| 7  | 2  | 2  | 5  | 1 | 1  | 7   |
| 30 | 9  | 2  | 5  | 2 | 5  | 22  |
| 7  | 1  | 1  | 10 | 0 | 4  | 4   |
| 9  | 3  | 0  | 4  | 1 | 4  | 11  |
| 20 | 2  | 0  | 13 | 0 | 13 | 30  |
| 4  | 1  | 1  | 5  | 0 | 5  | 9   |
| 3  | 3  | 1  | 2  | 0 | 30 | 94  |
| 8  | 0  | 1  | 6  | 2 | 2  | 3   |
| 22 | 0  | 3  | 3  | 2 | 7  | 21  |
| 5  | 0  | 5  | 4  | 1 | 6  | 10  |
| 9  | 0  | 1  | 5  | 1 | 5  | 2   |
| 3  | 4  | 2  | 8  | 1 | 3  | 5   |
| 1  | 4  | 0  | 2  | 1 | 4  | 6   |
| 14 | 1  | 1  | 10 | 3 | 6  | 17  |
| 14 | 3  | 1  | 6  | 2 | 3  | 2   |
| 22 | 3  | 2  | 0  | 0 | 3  | 6   |
| 9  | 0  | 0  | 2  | 1 | 5  | 6   |
| 20 | 1  | 2  | 0  | 0 | 2  | 6   |
| 21 | 4  | 3  | 6  | 0 | 5  | 8   |
| 4  | 2  | 0  | 5  | 0 | 2  | 5   |
| 8  | 4  | 0  | 2  | 4 | 10 | 17  |
| 68 | 0  | 3  | 2  | 0 | 0  | 41  |
| 7  | 2  | 4  | 2  | 1 | 2  | 7   |
| 14 | 1  | 0  | 6  | 0 | 4  | 10  |
| 14 | 4  | 0  | 4  | 0 | 10 | 49  |
| 13 | 2  | 4  | 1  | 0 | 4  | 2   |
| 12 | 5  | 2  | 3  | 1 | 10 | 5   |
| 6  | 1  | 0  | 1  | 0 | 9  | 30  |
| 19 | 4  | 1  | 1  | 1 | 12 | 20  |
| 5  | 4  | 2  | 2  | 0 | 3  | 1   |
| 6  | 6  | 5  | 2  | 2 | 5  | 4   |

|    |    |   |   |   |    |     |
|----|----|---|---|---|----|-----|
| 15 | 0  | 0 | 1 | 1 | 0  | 36  |
| 11 | 5  | 3 | 5 | 0 | 12 | 5   |
| 17 | 10 | 2 | 4 | 1 | 7  | 19  |
| 18 | 4  | 0 | 1 | 0 | 14 | 15  |
| 7  | 5  | 3 | 4 | 0 | 3  | 3   |
| 16 | 2  | 2 | 2 | 0 | 1  | 4   |
| 6  | 1  | 0 | 1 | 0 | 2  | 7   |
| 4  | 2  | 4 | 6 | 0 | 7  | 10  |
| 11 | 3  | 7 | 6 | 1 | 1  | 10  |
| 5  | 0  | 1 | 4 | 0 | 5  | 10  |
| 5  | 10 | 0 | 3 | 0 | 8  | 30  |
| 1  | 0  | 0 | 0 | 0 | 19 | 78  |
| 0  | 0  | 0 | 1 | 0 | 27 | 125 |
| 19 | 2  | 0 | 3 | 1 | 16 | 42  |
| 6  | 1  | 2 | 4 | 1 | 5  | 2   |
| 2  | 4  | 1 | 4 | 1 | 2  | 3   |
| 5  | 0  | 2 | 4 | 2 | 1  | 6   |
| 8  | 1  | 0 | 1 | 3 | 1  | 3   |
| 1  | 2  | 1 | 0 | 0 | 23 | 64  |
| 14 | 0  | 0 | 7 | 0 | 16 | 22  |
| 12 | 0  | 0 | 5 | 0 | 5  | 9   |
| 10 | 1  | 2 | 4 | 0 | 10 | 30  |
| 1  | 3  | 1 | 4 | 1 | 3  | 2   |
| 7  | 2  | 1 | 3 | 1 | 2  | 8   |
| 6  | 0  | 0 | 2 | 0 | 6  | 12  |
| 5  | 0  | 2 | 0 | 0 | 27 | 64  |
| 9  | 3  | 1 | 2 | 3 | 6  | 13  |
| 4  | 2  | 1 | 1 | 0 | 4  | 7   |
| 9  | 1  | 4 | 3 | 0 | 2  | 16  |
| 8  | 9  | 2 | 2 | 1 | 6  | 8   |
| 0  | 1  | 0 | 2 | 1 | 23 | 75  |
| 3  | 2  | 2 | 3 | 0 | 1  | 8   |
| 7  | 0  | 2 | 1 | 0 | 2  | 7   |
| 0  | 4  | 2 | 0 | 1 | 2  | 5   |
| 3  | 1  | 2 | 5 | 0 | 4  | 10  |
| 4  | 2  | 0 | 2 | 0 | 2  | 2   |
| 4  | 1  | 1 | 7 | 3 | 2  | 4   |
| 7  | 2  | 0 | 1 | 1 | 2  | 15  |
| 7  | 2  | 3 | 3 | 1 | 6  | 4   |
| 9  | 1  | 0 | 4 | 2 | 1  | 5   |
| 7  | 0  | 1 | 2 | 0 | 42 | 50  |
| 16 | 2  | 0 | 1 | 0 | 1  | 10  |
| 4  | 0  | 0 | 3 | 0 | 0  | 1   |
| 11 | 0  | 1 | 1 | 0 | 4  | 16  |
| 4  | 0  | 1 | 1 | 0 | 0  | 8   |
| 9  | 1  | 0 | 4 | 0 | 7  | 40  |
| 4  | 5  | 0 | 3 | 0 | 9  | 14  |
| 7  | 2  | 9 | 2 | 1 | 1  | 6   |
| 1  | 3  | 1 | 3 | 0 | 2  | 7   |
| 8  | 5  | 4 | 7 | 0 | 2  | 3   |
| 8  | 1  | 0 | 2 | 0 | 1  | 3   |
| 3  | 4  | 0 | 6 | 1 | 5  | 18  |
| 3  | 2  | 5 | 0 | 0 | 1  | 10  |
| 8  | 0  | 0 | 4 | 1 | 3  | 8   |
| 11 | 4  | 2 | 2 | 1 | 2  | 8   |
| 11 | 3  | 1 | 2 | 0 | 1  | 8   |
| 13 | 2  | 2 | 5 | 0 | 5  | 5   |
| 5  | 1  | 2 | 2 | 0 | 0  | 1   |
| 6  | 2  | 1 | 0 | 0 | 0  | 2   |

|    |   |   |   |   |    |    |
|----|---|---|---|---|----|----|
| 5  | 1 | 0 | 1 | 0 | 3  | 3  |
| 6  | 2 | 1 | 3 | 0 | 2  | 5  |
| 5  | 5 | 2 | 2 | 0 | 3  | 0  |
| 7  | 2 | 2 | 1 | 0 | 1  | 5  |
| 5  | 3 | 2 | 2 | 0 | 0  | 10 |
| 2  | 0 | 0 | 0 | 0 | 9  | 25 |
| 5  | 2 | 0 | 2 | 0 | 4  | 9  |
| 10 | 3 | 0 | 1 | 0 | 7  | 32 |
| 5  | 1 | 3 | 1 | 0 | 1  | 4  |
| 9  | 0 | 0 | 2 | 0 | 8  | 16 |
| 2  | 4 | 0 | 0 | 2 | 0  | 15 |
| 7  | 0 | 0 | 0 | 1 | 2  | 11 |
| 1  | 1 | 0 | 1 | 0 | 2  | 23 |
| 12 | 0 | 1 | 1 | 0 | 5  | 20 |
| 4  | 0 | 0 | 0 | 0 | 2  | 11 |
| 9  | 5 | 1 | 2 | 0 | 3  | 13 |
| 3  | 1 | 2 | 1 | 0 | 0  | 3  |
| 3  | 1 | 0 | 1 | 0 | 9  | 15 |
| 4  | 0 | 0 | 0 | 0 | 10 | 43 |
| 13 | 1 | 0 | 6 | 0 | 2  | 6  |
| 13 | 3 | 2 | 2 | 0 | 5  | 8  |
| 1  | 1 | 0 | 0 | 0 | 6  | 54 |
| 6  | 1 | 0 | 1 | 0 | 6  | 24 |
| 0  | 1 | 2 | 1 | 2 | 1  | 0  |
| 0  | 0 | 2 | 2 | 0 | 2  | 1  |
| 3  | 1 | 3 | 0 | 0 | 3  | 2  |
| 2  | 0 | 0 | 1 | 1 | 0  | 0  |
| 3  | 0 | 3 | 3 | 0 | 4  | 5  |
| 1  | 0 | 0 | 0 | 0 | 27 | 38 |
| 13 | 0 | 2 | 0 | 0 | 2  | 17 |
| 11 | 1 | 0 | 4 | 0 | 2  | 6  |
| 3  | 0 | 2 | 0 | 0 | 2  | 3  |
| 5  | 3 | 0 | 3 | 0 | 1  | 11 |
| 4  | 1 | 1 | 0 | 0 | 2  | 1  |
| 11 | 0 | 2 | 1 | 0 | 4  | 1  |
| 8  | 1 | 0 | 3 | 0 | 0  | 0  |
| 3  | 1 | 1 | 1 | 0 | 2  | 3  |
| 9  | 0 | 0 | 2 | 1 | 4  | 18 |
| 7  | 4 | 5 | 1 | 0 | 3  | 3  |
| 5  | 0 | 2 | 2 | 0 | 0  | 1  |
| 7  | 0 | 0 | 0 | 0 | 3  | 17 |
| 3  | 0 | 0 | 3 | 0 | 1  | 0  |
| 1  | 0 | 0 | 3 | 1 | 3  | 8  |
| 2  | 1 | 3 | 2 | 0 | 1  | 2  |
| 3  | 0 | 2 | 1 | 0 | 1  | 3  |
| 2  | 0 | 0 | 1 | 0 | 2  | 7  |
| 2  | 4 | 0 | 0 | 0 | 1  | 1  |
| 3  | 0 | 1 | 0 | 0 | 1  | 10 |
| 8  | 1 | 1 | 0 | 0 | 2  | 6  |
| 3  | 0 | 3 | 1 | 0 | 1  | 0  |
| 3  | 0 | 0 | 1 | 0 | 2  | 0  |
| 0  | 0 | 0 | 0 | 0 | 8  | 20 |
| 8  | 1 | 0 | 0 | 0 | 6  | 23 |
| 2  | 5 | 1 | 4 | 0 | 1  | 3  |
| 3  | 1 | 0 | 1 | 0 | 2  | 4  |
| 4  | 1 | 1 | 1 | 2 | 1  | 5  |
| 2  | 1 | 0 | 1 | 1 | 0  | 2  |
| 4  | 1 | 2 | 1 | 0 | 1  | 2  |
| 1  | 0 | 0 | 0 | 0 | 2  | 9  |



|         |        |         |         |        |        |         |
|---------|--------|---------|---------|--------|--------|---------|
| 3       | 1      | 1       | 3       | 0      | 0      | 5       |
| 4       | 0      | 1       | 0       | 0      | 4      | 2       |
| 5       | 3      | 0       | 1       | 0      | 5      | 9       |
| 15      | 5      | 1       | 1       | 0      | 1      | 2       |
| 8       | 1      | 1       | 1       | 0      | 5      | 6       |
| 0       | 0      | 0       | 0       | 0      | 0      | 2       |
| 1       | 0      | 1       | 1       | 1      | 1      | 2       |
| 2       | 0      | 2       | 0       | 0      | 0      | 1       |
| 2       | 1      | 0       | 1       | 0      | 1      | 5       |
| 1       | 1      | 0       | 0       | 1      | 0      | 0       |
| 4       | 1      | 0       | 0       | 1      | 1      | 4       |
| 4       | 0      | 0       | 0       | 0      | 0      | 2       |
| 0       | 0      | 0       | 0       | 0      | 0      | 0       |
| E_19    | E_21   | E_22    | E_23    | E_3    | E_46   | E_48    |
| CHR_P   | CHR_P  | CHR_P   | CHR_P   | CHR_P  | CHR_P  | CHR_P   |
| 7209491 | 961360 | 2967888 | 1064550 | 195834 | 836339 | 5372435 |
| 20      | 14     | 23      | 14      | 12     | 11     | 14      |
| -0.38   | -1.62  | 0.43    | -1.65   | -1.96  | -2.10  | -1.56   |

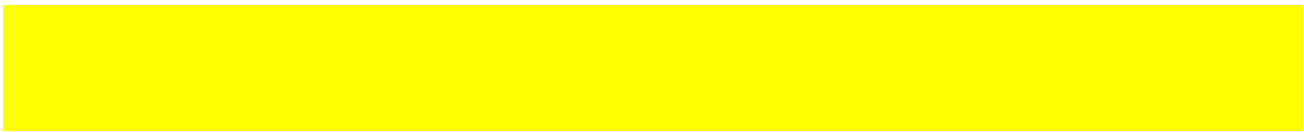

|         |         |         |         |         |         |         |
|---------|---------|---------|---------|---------|---------|---------|
| 0.05    | 0.73    | 0.98    | 0.95    | 0.87    | 0.42    | 0.25    |
| 26      | 8       | 1       | 2       | 4       | 14      | 18      |
| 1       | 1       | 1       | 1       | 1       | 1       | 1       |
| 85      | 86      | 87      | 88      | 89      | 90      | 91      |
| 20      | 21      | 22      | 23      | 24      | 25      | 26      |
| E_48    | E_7     | E_8     | E_9     | F_40    | F_41    | F_42    |
| CHR_P   | CHR_P   | CHR_P   | CHR_P   | CHR_P   | CHR_P   | CHR_P   |
| 7479891 | 1160935 | 2099567 | 1323600 | 3571995 | 3076499 | 1136044 |
| E_48    | E_7     | E_8     | E_9     | F_40    | F_41    | F_42    |
| 997282  | 430892  | 567895  | 487095  | 1116571 | 1013554 | 241383  |
| 209441  | 93617   | 196075  | 92860   | 372466  | 369204  | 95275   |
| 138640  | 148736  | 270305  | 150760  | 144769  | 367770  | 14583   |
| 352710  | 30353   | 113550  | 79014   | 173851  | 170780  | 142685  |
| 246250  | 82596   | 155876  | 85452   | 187609  | 167992  | 65057   |
| 1441458 | 38241   | 80210   | 45678   | 265139  | 98721   | 59034   |
| 350839  | 69449   | 163721  | 80719   | 154960  | 157746  | 44478   |
| 1126803 | 15818   | 9548    | 3869    | 67671   | 13031   | 23608   |
| 268023  | 24670   | 55580   | 23927   | 105923  | 72153   | 21383   |
| 179239  | 17073   | 30178   | 26587   | 104997  | 54674   | 42363   |
| 96561   | 6552    | 22873   | 20929   | 47605   | 26249   | 28124   |
| 90006   | 20378   | 39596   | 18875   | 47949   | 43533   | 16743   |
| 151565  | 4948    | 31680   | 16258   | 45264   | 32383   | 56843   |
| 56920   | 9117    | 18724   | 14550   | 23025   | 27635   | 12557   |
| 240590  | 2835    | 13374   | 4201    | 59787   | 11354   | 52887   |
| 21272   | 10259   | 19506   | 12243   | 13077   | 24806   | 7630    |
| 140819  | 3697    | 21576   | 5753    | 49007   | 14030   | 13898   |
| 56091   | 7747    | 16607   | 7422    | 42871   | 22011   | 11271   |
| 60966   | 8106    | 13417   | 6278    | 35265   | 18210   | 6886    |

|       |      |       |      |       |       |       |
|-------|------|-------|------|-------|-------|-------|
| 23674 | 7861 | 13955 | 6599 | 35791 | 18606 | 4800  |
| 35615 | 5428 | 11601 | 4615 | 30985 | 15512 | 7157  |
| 27571 | 3104 | 8290  | 5474 | 15659 | 11635 | 6148  |
| 41399 | 2483 | 9850  | 5079 | 41393 | 10738 | 7328  |
| 30680 | 5398 | 11011 | 3173 | 22523 | 23870 | 7963  |
| 59425 | 1975 | 7215  | 2028 | 30065 | 8975  | 23658 |
| 26419 | 6156 | 14455 | 7456 | 21998 | 15343 | 2634  |
| 15113 | 5195 | 7325  | 5344 | 8119  | 10887 | 6897  |
| 58871 | 602  | 2808  | 3748 | 16981 | 4214  | 16425 |
| 36799 | 5374 | 8404  | 7902 | 10130 | 15437 | 4288  |
| 12463 | 3316 | 8131  | 4344 | 13042 | 12622 | 3104  |
| 18471 | 6800 | 10459 | 4813 | 20057 | 13608 | 1778  |
| 20715 | 2173 | 6876  | 3633 | 7891  | 10504 | 6304  |
| 88289 | 2238 | 5921  | 2503 | 8198  | 5449  | 4144  |
| 86977 | 400  | 1536  | 507  | 13168 | 1871  | 3973  |
| 33597 | 5072 | 7830  | 7291 | 9354  | 14606 | 3939  |
| 12579 | 2375 | 4735  | 5382 | 6126  | 9559  | 1804  |
| 16360 | 4499 | 3898  | 2305 | 11683 | 5682  | 2563  |
| 14919 | 1807 | 4669  | 2725 | 9688  | 5919  | 3708  |
| 5546  | 1572 | 4467  | 2886 | 9818  | 4133  | 1843  |
| 7478  | 3962 | 3780  | 1108 | 6009  | 7634  | 2383  |
| 3516  | 3040 | 4636  | 2942 | 5063  | 7426  | 563   |
| 6831  | 2074 | 4725  | 2355 | 7359  | 5694  | 2415  |
| 7229  | 3507 | 4286  | 3015 | 3652  | 8135  | 945   |
| 63328 | 462  | 795   | 435  | 5207  | 1104  | 8344  |
| 7620  | 3969 | 6665  | 2790 | 3222  | 6505  | 1015  |
| 5820  | 2660 | 4605  | 2146 | 6160  | 5870  | 861   |
| 8264  | 1795 | 3923  | 1942 | 5275  | 5637  | 1408  |
| 4060  | 1890 | 2452  | 1926 | 4581  | 3481  | 1159  |
| 81989 | 101  | 608   | 528  | 411   | 357   | 1106  |
| 20102 | 1531 | 1660  | 560  | 10454 | 1263  | 3912  |
| 1234  | 577  | 2301  | 353  | 1459  | 1227  | 726   |
| 4450  | 1324 | 2938  | 1110 | 4484  | 4212  | 869   |
| 2965  | 997  | 1626  | 1168 | 2419  | 3051  | 573   |
| 5283  | 1007 | 2207  | 865  | 8034  | 3130  | 2145  |
| 14583 | 910  | 2869  | 901  | 4326  | 1250  | 894   |
| 52418 | 90   | 206   | 122  | 813   | 188   | 596   |
| 5085  | 1265 | 1894  | 1268 | 2534  | 3161  | 456   |
| 5368  | 1543 | 3472  | 985  | 3668  | 2730  | 1781  |
| 2898  | 641  | 2239  | 1399 | 3604  | 3307  | 980   |
| 866   | 2086 | 1142  | 1136 | 695   | 4455  | 592   |
| 1891  | 892  | 1525  | 788  | 1996  | 2164  | 364   |
| 4266  | 1013 | 1840  | 524  | 3786  | 1964  | 1108  |
| 19160 | 99   | 206   | 119  | 777   | 301   | 231   |
| 41406 | 87   | 159   | 86   | 157   | 188   | 82    |
| 2546  | 820  | 711   | 1147 | 1402  | 1428  | 847   |
| 8508  | 410  | 948   | 453  | 2657  | 1395  | 620   |
| 12660 | 445  | 1045  | 449  | 2256  | 962   | 279   |
| 17584 | 183  | 487   | 218  | 1561  | 626   | 1137  |
| 4640  | 623  | 1575  | 572  | 2504  | 2208  | 480   |
| 2545  | 125  | 676   | 1280 | 2557  | 1669  | 449   |
| 930   | 780  | 1069  | 561  | 1379  | 1561  | 138   |
| 1742  | 576  | 636   | 801  | 1705  | 1845  | 568   |
| 11559 | 100  | 330   | 140  | 1884  | 326   | 1700  |
| 3626  | 376  | 782   | 409  | 3583  | 1678  | 754   |
| 3297  | 760  | 2173  | 786  | 2036  | 2754  | 430   |
| 1374  | 177  | 654   | 101  | 642   | 530   | 748   |
| 2498  | 601  | 1074  | 495  | 1963  | 1290  | 471   |
| 1156  | 750  | 499   | 320  | 672   | 2716  | 279   |

|       |     |     |     |      |      |     |
|-------|-----|-----|-----|------|------|-----|
| 789   | 441 | 690 | 278 | 1062 | 1337 | 379 |
| 660   | 494 | 727 | 366 | 980  | 1232 | 90  |
| 3532  | 470 | 797 | 751 | 900  | 1439 | 377 |
| 864   | 601 | 820 | 391 | 1207 | 1255 | 185 |
| 1466  | 481 | 584 | 586 | 1104 | 1268 | 265 |
| 5159  | 37  | 445 | 91  | 692  | 243  | 161 |
| 3665  | 418 | 946 | 336 | 962  | 1254 | 472 |
| 827   | 608 | 604 | 349 | 641  | 988  | 39  |
| 684   | 436 | 482 | 357 | 679  | 1179 | 115 |
| 5400  | 270 | 480 | 154 | 882  | 601  | 373 |
| 1873  | 430 | 823 | 406 | 1734 | 1317 | 320 |
| 579   | 311 | 493 | 223 | 491  | 1415 | 640 |
| 784   | 400 | 556 | 0   | 1298 | 985  | 445 |
| 17637 | 14  | 42  | 35  | 23   | 50   | 8   |
| 1639  | 369 | 883 | 293 | 784  | 656  | 198 |
| 1658  | 319 | 492 | 301 | 769  | 719  | 59  |
| 6124  | 144 | 209 | 122 | 729  | 266  | 118 |
| 1795  | 220 | 539 | 120 | 964  | 600  | 216 |
| 343   | 284 | 379 | 220 | 924  | 686  | 159 |
| 661   | 255 | 377 | 326 | 639  | 474  | 235 |
| 358   | 274 | 467 | 223 | 784  | 816  | 235 |
| 4941  | 51  | 94  | 43  | 997  | 155  | 367 |
| 414   | 261 | 303 | 99  | 547  | 740  | 11  |
| 1011  | 283 | 631 | 254 | 1150 | 929  | 107 |
| 423   | 191 | 358 | 245 | 392  | 625  | 151 |
| 1224  | 124 | 481 | 76  | 384  | 375  | 640 |
| 2474  | 144 | 207 | 166 | 798  | 328  | 71  |
| 3901  | 82  | 134 | 63  | 821  | 151  | 316 |
| 292   | 318 | 354 | 184 | 377  | 500  | 27  |
| 677   | 212 | 458 | 253 | 663  | 825  | 127 |
| 3702  | 102 | 225 | 132 | 358  | 334  | 195 |
| 2947  | 161 | 197 | 99  | 501  | 265  | 339 |
| 1928  | 210 | 442 | 97  | 1018 | 383  | 246 |
| 447   | 221 | 443 | 173 | 610  | 697  | 121 |
| 140   | 324 | 260 | 113 | 422  | 546  | 23  |
| 2359  | 68  | 146 | 94  | 485  | 245  | 182 |
| 1010  | 134 | 410 | 250 | 439  | 587  | 50  |
| 376   | 78  | 235 | 178 | 322  | 315  | 200 |
| 653   | 180 | 220 | 114 | 270  | 504  | 418 |
| 849   | 109 | 251 | 82  | 386  | 268  | 113 |
| 849   | 109 | 251 | 82  | 386  | 268  | 113 |
| 178   | 126 | 148 | 98  | 245  | 281  | 35  |
| 326   | 120 | 235 | 184 | 186  | 266  | 29  |
| 236   | 103 | 264 | 140 | 405  | 465  | 42  |
| 1198  | 32  | 241 | 24  | 248  | 77   | 199 |
| 625   | 120 | 213 | 96  | 806  | 222  | 284 |
| 3914  | 21  | 31  | 19  | 70   | 51   | 14  |
| 245   | 81  | 151 | 115 | 238  | 369  | 89  |
| 224   | 151 | 261 | 162 | 132  | 317  | 66  |
| 278   | 167 | 294 | 109 | 354  | 309  | 20  |
| 161   | 134 | 171 | 77  | 190  | 393  | 47  |
| 176   | 34  | 159 | 115 | 319  | 298  | 107 |
| 1273  | 37  | 72  | 50  | 266  | 357  | 34  |
| 294   | 139 | 241 | 123 | 299  | 299  | 22  |
| 303   | 228 | 130 | 57  | 116  | 357  | 60  |
| 205   | 170 | 162 | 82  | 285  | 406  | 21  |
| 1564  | 57  | 195 | 52  | 224  | 118  | 39  |
| 216   | 94  | 187 | 69  | 306  | 220  | 103 |
| 860   | 47  | 184 | 38  | 211  | 193  | 263 |

|      |     |     |     |     |     |     |
|------|-----|-----|-----|-----|-----|-----|
| 642  | 84  | 134 | 109 | 218 | 127 | 61  |
| 1010 | 102 | 212 | 111 | 144 | 235 | 152 |
| 241  | 109 | 167 | 94  | 131 | 306 | 22  |
| 395  | 77  | 167 | 90  | 161 | 131 | 85  |
| 297  | 131 | 159 | 107 | 213 | 387 | 39  |
| 181  | 77  | 118 | 38  | 112 | 143 | 18  |
| 402  | 78  | 183 | 100 | 111 | 266 | 93  |
| 2105 | 4   | 15  | 6   | 37  | 48  | 38  |
| 341  | 49  | 88  | 123 | 112 | 120 | 30  |
| 86   | 50  | 141 | 87  | 210 | 225 | 55  |
| 404  | 80  | 165 | 70  | 351 | 262 | 33  |
| 168  | 63  | 68  | 89  | 130 | 241 | 40  |
| 192  | 108 | 118 | 67  | 109 | 182 | 11  |
| 530  | 36  | 109 | 15  | 362 | 150 | 117 |
| 864  | 29  | 64  | 42  | 151 | 133 | 58  |
| 759  | 26  | 89  | 7   | 141 | 27  | 107 |
| 159  | 101 | 123 | 68  | 186 | 248 | 60  |
| 245  | 69  | 121 | 25  | 49  | 93  | 27  |
| 124  | 38  | 57  | 76  | 78  | 174 | 18  |
| 199  | 35  | 77  | 15  | 171 | 139 | 62  |
| 40   | 80  | 68  | 32  | 44  | 189 | 4   |
| 151  | 87  | 100 | 52  | 120 | 163 | 22  |
| 271  | 55  | 77  | 29  | 123 | 106 | 35  |
| 1934 | 4   | 10  | 3   | 38  | 13  | 13  |
| 74   | 33  | 90  | 45  | 143 | 181 | 16  |
| 161  | 53  | 91  | 45  | 110 | 150 | 19  |
| 640  | 30  | 84  | 24  | 278 | 102 | 42  |
| 284  | 48  | 113 | 35  | 290 | 207 | 35  |
| 116  | 48  | 77  | 73  | 78  | 100 | 27  |
| 147  | 62  | 128 | 59  | 149 | 192 | 21  |
| 33   | 37  | 50  | 13  | 37  | 52  | 8   |
| 1273 | 28  | 60  | 16  | 89  | 45  | 24  |
| 235  | 52  | 52  | 78  | 77  | 74  | 60  |
| 122  | 36  | 119 | 39  | 79  | 248 | 44  |
| 302  | 13  | 63  | 42  | 122 | 51  | 64  |
| 125  | 44  | 104 | 54  | 164 | 122 | 26  |
| 222  | 60  | 120 | 31  | 164 | 151 | 16  |
| 460  | 48  | 85  | 30  | 319 | 103 | 47  |
| 120  | 56  | 98  | 43  | 76  | 78  | 8   |
| 95   | 12  | 49  | 18  | 14  | 25  | 22  |
| 418  | 38  | 84  | 20  | 259 | 106 | 49  |
| 151  | 70  | 81  | 24  | 127 | 90  | 10  |
| 91   | 21  | 50  | 16  | 29  | 40  | 10  |
| 190  | 5   | 67  | 0   | 79  | 174 | 21  |
| 573  | 18  | 43  | 14  | 203 | 50  | 111 |
| 23   | 10  | 45  | 13  | 16  | 16  | 19  |
| 466  | 28  | 40  | 14  | 235 | 66  | 37  |
| 22   | 22  | 39  | 21  | 57  | 85  | 9   |
| 91   | 32  | 59  | 35  | 70  | 88  | 29  |
| 543  | 17  | 42  | 14  | 192 | 48  | 104 |
| 51   | 12  | 58  | 6   | 38  | 18  | 37  |
| 76   | 94  | 33  | 50  | 49  | 96  | 20  |
| 165  | 22  | 49  | 29  | 154 | 142 | 31  |
| 11   | 48  | 58  | 75  | 2   | 104 | 0   |
| 297  | 21  | 9   | 1   | 116 | 16  | 14  |
| 89   | 47  | 69  | 25  | 139 | 93  | 29  |
| 34   | 39  | 53  | 52  | 87  | 69  | 49  |
| 109  | 27  | 34  | 33  | 96  | 109 | 11  |
| 121  | 108 | 108 | 79  | 48  | 130 | 20  |

|      |    |    |    |     |     |    |
|------|----|----|----|-----|-----|----|
| 1148 | 34 | 54 | 5  | 142 | 20  | 80 |
| 237  | 20 | 17 | 24 | 111 | 33  | 25 |
| 64   | 34 | 46 | 25 | 63  | 53  | 4  |
| 235  | 10 | 53 | 51 | 147 | 94  | 24 |
| 109  | 53 | 88 | 19 | 70  | 114 | 26 |
| 57   | 28 | 12 | 23 | 61  | 87  | 4  |
| 108  | 29 | 45 | 21 | 100 | 73  | 18 |
| 61   | 18 | 43 | 39 | 118 | 73  | 25 |
| 551  | 12 | 28 | 10 | 81  | 30  | 15 |
| 46   | 14 | 80 | 8  | 23  | 35  | 19 |
| 170  | 33 | 42 | 35 | 83  | 107 | 19 |
| 70   | 32 | 75 | 22 | 72  | 80  | 3  |
| 17   | 76 | 18 | 14 | 36  | 78  | 8  |
| 190  | 29 | 43 | 33 | 32  | 51  | 30 |
| 73   | 42 | 68 | 42 | 55  | 124 | 20 |
| 48   | 27 | 71 | 28 | 107 | 114 | 19 |
| 489  | 4  | 40 | 5  | 84  | 17  | 81 |
| 64   | 40 | 26 | 37 | 36  | 37  | 3  |
| 356  | 24 | 46 | 27 | 123 | 38  | 6  |
| 56   | 34 | 46 | 24 | 123 | 88  | 12 |
| 140  | 38 | 45 | 30 | 100 | 97  | 20 |
| 120  | 32 | 56 | 19 | 97  | 57  | 27 |
| 1485 | 0  | 1  | 3  | 13  | 4   | 9  |
| 110  | 22 | 52 | 13 | 72  | 72  | 23 |
| 84   | 46 | 58 | 1  | 65  | 19  | 4  |
| 52   | 22 | 38 | 36 | 30  | 47  | 3  |
| 178  | 26 | 61 | 0  | 50  | 71  | 11 |
| 41   | 11 | 30 | 12 | 52  | 29  | 3  |
| 34   | 9  | 56 | 3  | 25  | 10  | 10 |
| 40   | 29 | 29 | 24 | 32  | 35  | 16 |
| 60   | 15 | 52 | 24 | 45  | 64  | 40 |
| 67   | 10 | 57 | 26 | 18  | 37  | 5  |
| 37   | 22 | 25 | 11 | 21  | 61  | 8  |
| 76   | 16 | 34 | 22 | 37  | 62  | 14 |
| 166  | 11 | 13 | 9  | 81  | 27  | 9  |
| 67   | 20 | 25 | 26 | 59  | 33  | 8  |
| 598  | 2  | 2  | 2  | 21  | 8   | 9  |
| 29   | 20 | 17 | 16 | 30  | 70  | 3  |
| 179  | 24 | 41 | 23 | 43  | 39  | 5  |
| 54   | 13 | 34 | 25 | 24  | 90  | 3  |
| 47   | 31 | 26 | 33 | 34  | 77  | 4  |
| 163  | 8  | 42 | 5  | 70  | 54  | 15 |
| 84   | 21 | 24 | 6  | 55  | 51  | 23 |
| 66   | 21 | 31 | 22 | 61  | 82  | 3  |
| 59   | 1  | 23 | 4  | 12  | 12  | 10 |
| 112  | 14 | 42 | 11 | 55  | 40  | 3  |
| 259  | 3  | 8  | 2  | 117 | 24  | 35 |
| 75   | 23 | 31 | 17 | 64  | 57  | 11 |
| 75   | 23 | 31 | 17 | 64  | 57  | 11 |
| 14   | 2  | 16 | 4  | 8   | 13  | 6  |
| 62   | 13 | 32 | 28 | 29  | 39  | 3  |
| 117  | 21 | 16 | 15 | 32  | 62  | 6  |
| 52   | 7  | 44 | 4  | 14  | 20  | 13 |
| 89   | 18 | 42 | 20 | 57  | 52  | 5  |
| 32   | 13 | 36 | 8  | 48  | 57  | 6  |
| 90   | 3  | 19 | 19 | 51  | 18  | 17 |
| 78   | 10 | 19 | 33 | 19  | 46  | 11 |
| 54   | 11 | 32 | 13 | 30  | 38  | 12 |
| 51   | 14 | 34 | 11 | 100 | 37  | 19 |

|     |    |    |    |    |    |    |
|-----|----|----|----|----|----|----|
| 50  | 6  | 8  | 10 | 19 | 24 | 9  |
| 54  | 37 | 25 | 11 | 10 | 33 | 13 |
| 55  | 12 | 22 | 14 | 28 | 51 | 10 |
| 499 | 0  | 0  | 2  | 4  | 3  | 0  |
| 47  | 14 | 32 | 14 | 28 | 39 | 8  |
| 61  | 10 | 19 | 12 | 69 | 31 | 14 |
| 44  | 15 | 36 | 19 | 38 | 54 | 22 |
| 40  | 10 | 5  | 21 | 17 | 20 | 5  |
| 55  | 10 | 17 | 11 | 63 | 29 | 11 |
| 13  | 16 | 20 | 8  | 13 | 40 | 4  |
| 46  | 16 | 26 | 14 | 6  | 39 | 11 |
| 105 | 9  | 31 | 14 | 46 | 28 | 3  |
| 44  | 8  | 18 | 23 | 19 | 32 | 9  |
| 584 | 1  | 0  | 0  | 1  | 1  | 1  |
| 22  | 16 | 33 | 20 | 12 | 29 | 12 |
| 26  | 16 | 11 | 17 | 13 | 10 | 1  |
| 57  | 12 | 20 | 13 | 16 | 28 | 7  |
| 17  | 6  | 18 | 6  | 8  | 21 | 4  |
| 79  | 6  | 20 | 5  | 54 | 13 | 26 |
| 562 | 1  | 1  | 1  | 5  | 0  | 45 |
| 28  | 9  | 15 | 11 | 12 | 51 | 4  |
| 51  | 7  | 19 | 1  | 41 | 14 | 10 |
| 0   | 53 | 0  | 0  | 0  | 0  | 0  |
| 34  | 23 | 31 | 13 | 14 | 36 | 7  |
| 14  | 7  | 3  | 12 | 48 | 29 | 8  |
| 21  | 9  | 9  | 8  | 25 | 20 | 5  |
| 21  | 2  | 8  | 6  | 4  | 13 | 3  |
| 31  | 5  | 17 | 6  | 23 | 17 | 11 |
| 15  | 3  | 15 | 6  | 11 | 5  | 15 |
| 31  | 10 | 17 | 17 | 24 | 42 | 2  |
| 12  | 15 | 8  | 9  | 16 | 21 | 3  |
| 11  | 10 | 13 | 15 | 20 | 35 | 4  |
| 39  | 7  | 18 | 1  | 36 | 14 | 8  |
| 11  | 2  | 19 | 4  | 13 | 1  | 5  |
| 199 | 1  | 0  | 2  | 5  | 3  | 19 |
| 199 | 8  | 20 | 4  | 19 | 6  | 8  |
| 29  | 8  | 23 | 17 | 44 | 27 | 13 |
| 11  | 12 | 19 | 7  | 24 | 19 | 2  |
| 53  | 3  | 13 | 7  | 30 | 11 | 7  |
| 12  | 14 | 25 | 7  | 18 | 19 | 4  |
| 20  | 2  | 16 | 3  | 5  | 8  | 11 |
| 97  | 7  | 13 | 7  | 41 | 10 | 16 |
| 28  | 12 | 6  | 3  | 23 | 11 | 13 |
| 67  | 12 | 20 | 7  | 22 | 35 | 2  |
| 17  | 12 | 16 | 7  | 15 | 19 | 4  |
| 22  | 4  | 15 | 1  | 11 | 5  | 0  |
| 13  | 3  | 14 | 2  | 4  | 9  | 4  |
| 34  | 4  | 27 | 10 | 20 | 26 | 3  |
| 20  | 6  | 12 | 10 | 22 | 24 | 5  |
| 28  | 8  | 6  | 7  | 4  | 19 | 5  |
| 52  | 7  | 9  | 3  | 51 | 11 | 6  |
| 34  | 8  | 24 | 5  | 24 | 29 | 7  |
| 11  | 11 | 18 | 7  | 8  | 23 | 0  |
| 6   | 4  | 11 | 7  | 9  | 16 | 2  |
| 9   | 4  | 18 | 4  | 13 | 32 | 2  |
| 22  | 11 | 18 | 7  | 24 | 26 | 1  |
| 28  | 6  | 10 | 8  | 28 | 12 | 14 |
| 167 | 3  | 8  | 2  | 29 | 2  | 28 |
| 128 | 1  | 6  | 5  | 38 | 10 | 2  |

|     |    |    |    |    |    |    |
|-----|----|----|----|----|----|----|
| 65  | 6  | 4  | 2  | 24 | 12 | 10 |
| 41  | 5  | 11 | 7  | 21 | 25 | 6  |
| 9   | 5  | 10 | 6  | 8  | 15 | 1  |
| 20  | 11 | 11 | 2  | 17 | 5  | 3  |
| 21  | 7  | 18 | 9  | 25 | 18 | 1  |
| 33  | 7  | 14 | 12 | 7  | 14 | 6  |
| 13  | 5  | 9  | 10 | 13 | 23 | 9  |
| 88  | 5  | 7  | 3  | 28 | 9  | 7  |
| 22  | 6  | 13 | 3  | 32 | 17 | 10 |
| 7   | 0  | 20 | 0  | 4  | 10 | 4  |
| 3   | 15 | 5  | 12 | 20 | 35 | 3  |
| 12  | 4  | 17 | 3  | 9  | 10 | 8  |
| 1   | 4  | 12 | 0  | 15 | 9  | 1  |
| 25  | 5  | 15 | 13 | 10 | 14 | 3  |
| 52  | 3  | 10 | 4  | 9  | 7  | 10 |
| 12  | 5  | 3  | 6  | 6  | 13 | 0  |
| 13  | 2  | 19 | 1  | 14 | 21 | 6  |
| 8   | 5  | 11 | 3  | 3  | 11 | 2  |
| 143 | 3  | 3  | 2  | 0  | 2  | 0  |
| 8   | 9  | 5  | 8  | 6  | 13 | 1  |
| 97  | 3  | 9  | 3  | 20 | 11 | 13 |
| 33  | 8  | 10 | 11 | 5  | 6  | 4  |
| 24  | 7  | 8  | 2  | 37 | 17 | 9  |
| 9   | 4  | 14 | 3  | 22 | 27 | 0  |
| 67  | 5  | 4  | 3  | 27 | 27 | 2  |
| 35  | 3  | 6  | 7  | 21 | 5  | 4  |
| 11  | 5  | 7  | 3  | 12 | 14 | 7  |
| 6   | 11 | 3  | 7  | 8  | 20 | 4  |
| 45  | 4  | 9  | 4  | 42 | 20 | 6  |
| 10  | 7  | 7  | 3  | 12 | 15 | 1  |
| 8   | 1  | 11 | 11 | 20 | 10 | 6  |
| 12  | 11 | 3  | 7  | 8  | 15 | 1  |
| 11  | 6  | 6  | 3  | 10 | 12 | 1  |
| 113 | 1  | 1  | 0  | 6  | 3  | 7  |
| 34  | 4  | 7  | 6  | 15 | 8  | 6  |
| 9   | 2  | 17 | 6  | 13 | 16 | 4  |
| 4   | 8  | 7  | 4  | 15 | 10 | 0  |
| 34  | 8  | 7  | 2  | 18 | 10 | 3  |
| 12  | 2  | 5  | 9  | 8  | 7  | 6  |
| 65  | 1  | 3  | 0  | 19 | 1  | 1  |
| 8   | 7  | 12 | 3  | 14 | 4  | 7  |
| 22  | 3  | 11 | 1  | 14 | 6  | 2  |
| 15  | 7  | 16 | 0  | 13 | 11 | 2  |
| 13  | 4  | 4  | 7  | 12 | 17 | 5  |
| 55  | 3  | 6  | 0  | 17 | 2  | 0  |
| 10  | 2  | 12 | 3  | 8  | 13 | 0  |
| 34  | 4  | 7  | 2  | 22 | 8  | 4  |
| 15  | 6  | 4  | 2  | 20 | 12 | 1  |
| 13  | 4  | 18 | 6  | 6  | 23 | 7  |
| 11  | 4  | 5  | 3  | 10 | 7  | 0  |
| 17  | 5  | 6  | 9  | 4  | 3  | 0  |
| 8   | 1  | 5  | 1  | 9  | 6  | 4  |
| 51  | 4  | 2  | 1  | 38 | 5  | 7  |
| 59  | 2  | 1  | 2  | 18 | 3  | 1  |
| 7   | 7  | 7  | 3  | 5  | 6  | 6  |
| 22  | 3  | 11 | 6  | 10 | 13 | 1  |
| 4   | 1  | 4  | 5  | 8  | 14 | 0  |
| 11  | 2  | 14 | 6  | 12 | 11 | 5  |
| 30  | 2  | 13 | 7  | 11 | 8  | 2  |

|     |    |    |   |    |    |    |
|-----|----|----|---|----|----|----|
| 9   | 5  | 11 | 6 | 6  | 11 | 0  |
| 94  | 2  | 4  | 3 | 12 | 4  | 1  |
| 3   | 0  | 2  | 2 | 0  | 3  | 2  |
| 21  | 4  | 5  | 1 | 18 | 13 | 1  |
| 10  | 4  | 3  | 1 | 8  | 12 | 5  |
| 2   | 6  | 8  | 3 | 7  | 5  | 0  |
| 5   | 2  | 10 | 1 | 9  | 4  | 1  |
| 6   | 3  | 8  | 2 | 10 | 6  | 4  |
| 17  | 5  | 19 | 7 | 6  | 17 | 0  |
| 2   | 1  | 7  | 1 | 4  | 3  | 1  |
| 6   | 14 | 3  | 2 | 10 | 13 | 2  |
| 6   | 5  | 11 | 5 | 7  | 16 | 1  |
| 6   | 3  | 2  | 2 | 13 | 7  | 2  |
| 8   | 5  | 10 | 4 | 9  | 16 | 0  |
| 5   | 3  | 2  | 1 | 8  | 5  | 1  |
| 17  | 2  | 5  | 0 | 9  | 5  | 4  |
| 41  | 5  | 3  | 0 | 41 | 3  | 0  |
| 7   | 1  | 4  | 0 | 3  | 5  | 1  |
| 10  | 2  | 16 | 3 | 2  | 1  | 1  |
| 49  | 2  | 4  | 1 | 12 | 4  | 1  |
| 2   | 4  | 3  | 0 | 7  | 16 | 0  |
| 5   | 4  | 5  | 3 | 5  | 8  | 3  |
| 30  | 0  | 0  | 1 | 8  | 5  | 8  |
| 20  | 4  | 10 | 2 | 8  | 4  | 2  |
| 1   | 5  | 5  | 5 | 8  | 5  | 1  |
| 4   | 7  | 2  | 0 | 5  | 11 | 0  |
| 36  | 2  | 0  | 2 | 8  | 4  | 0  |
| 5   | 4  | 4  | 3 | 5  | 2  | 2  |
| 19  | 2  | 6  | 0 | 19 | 4  | 10 |
| 15  | 0  | 5  | 1 | 8  | 0  | 4  |
| 3   | 4  | 5  | 1 | 3  | 3  | 5  |
| 4   | 2  | 2  | 1 | 2  | 9  | 5  |
| 7   | 1  | 2  | 6 | 5  | 4  | 0  |
| 10  | 2  | 7  | 3 | 6  | 7  | 4  |
| 10  | 4  | 4  | 3 | 2  | 5  | 0  |
| 10  | 0  | 4  | 3 | 6  | 3  | 2  |
| 30  | 3  | 2  | 1 | 19 | 2  | 4  |
| 78  | 0  | 3  | 1 | 2  | 4  | 2  |
| 125 | 0  | 0  | 0 | 1  | 0  | 1  |
| 42  | 2  | 8  | 3 | 9  | 6  | 1  |
| 2   | 1  | 2  | 2 | 3  | 3  | 1  |
| 3   | 0  | 3  | 0 | 6  | 3  | 2  |
| 6   | 1  | 3  | 6 | 2  | 8  | 1  |
| 3   | 3  | 0  | 4 | 3  | 4  | 0  |
| 64  | 0  | 0  | 0 | 0  | 0  | 0  |
| 22  | 0  | 5  | 0 | 1  | 2  | 12 |
| 9   | 0  | 4  | 0 | 2  | 1  | 2  |
| 30  | 0  | 6  | 0 | 11 | 3  | 2  |
| 2   | 7  | 3  | 2 | 7  | 15 | 1  |
| 8   | 4  | 3  | 1 | 1  | 17 | 3  |
| 12  | 0  | 3  | 2 | 2  | 7  | 0  |
| 64  | 0  | 1  | 0 | 8  | 0  | 2  |
| 13  | 3  | 11 | 5 | 2  | 4  | 0  |
| 7   | 2  | 2  | 1 | 22 | 7  | 4  |
| 16  | 5  | 2  | 3 | 3  | 11 | 0  |
| 8   | 3  | 5  | 2 | 10 | 6  | 2  |
| 75  | 2  | 0  | 1 | 3  | 1  | 1  |
| 8   | 4  | 1  | 1 | 12 | 7  | 0  |
| 7   | 1  | 1  | 0 | 8  | 7  | 1  |



|    |    |   |   |    |    |   |
|----|----|---|---|----|----|---|
| 5  | 0  | 4 | 1 | 2  | 8  | 3 |
| 10 | 0  | 4 | 1 | 10 | 5  | 3 |
| 2  | 2  | 3 | 1 | 5  | 5  | 1 |
| 4  | 0  | 7 | 0 | 3  | 5  | 0 |
| 15 | 3  | 1 | 2 | 6  | 1  | 0 |
| 4  | 4  | 7 | 1 | 9  | 4  | 1 |
| 5  | 1  | 3 | 1 | 1  | 0  | 1 |
| 50 | 0  | 0 | 1 | 0  | 0  | 0 |
| 10 | 5  | 4 | 1 | 10 | 6  | 3 |
| 1  | 1  | 3 | 1 | 9  | 3  | 1 |
| 16 | 1  | 7 | 0 | 9  | 7  | 0 |
| 8  | 1  | 4 | 2 | 9  | 6  | 0 |
| 40 | 1  | 5 | 1 | 2  | 0  | 0 |
| 14 | 0  | 1 | 1 | 13 | 3  | 5 |
| 6  | 4  | 2 | 1 | 4  | 9  | 0 |
| 7  | 2  | 5 | 1 | 6  | 5  | 0 |
| 3  | 1  | 2 | 3 | 3  | 7  | 1 |
| 3  | 0  | 1 | 1 | 5  | 5  | 5 |
| 18 | 1  | 2 | 2 | 5  | 4  | 1 |
| 10 | 0  | 1 | 1 | 2  | 1  | 0 |
| 8  | 2  | 1 | 4 | 6  | 3  | 2 |
| 8  | 3  | 5 | 1 | 6  | 7  | 0 |
| 8  | 2  | 1 | 1 | 7  | 5  | 3 |
| 5  | 1  | 1 | 2 | 1  | 3  | 0 |
| 1  | 2  | 1 | 1 | 0  | 2  | 4 |
| 2  | 1  | 1 | 2 | 0  | 2  | 0 |
| 3  | 3  | 1 | 1 | 0  | 3  | 0 |
| 5  | 1  | 2 | 1 | 1  | 4  | 2 |
| 0  | 2  | 3 | 4 | 5  | 4  | 3 |
| 5  | 1  | 4 | 0 | 4  | 2  | 0 |
| 10 | 1  | 2 | 2 | 5  | 10 | 0 |
| 25 | 0  | 0 | 0 | 2  | 1  | 2 |
| 9  | 1  | 4 | 0 | 0  | 3  | 0 |
| 32 | 3  | 3 | 0 | 4  | 2  | 0 |
| 4  | 5  | 4 | 2 | 5  | 7  | 3 |
| 16 | 1  | 2 | 0 | 2  | 1  | 3 |
| 15 | 10 | 3 | 2 | 6  | 2  | 0 |
| 11 | 0  | 2 | 0 | 1  | 3  | 0 |
| 23 | 0  | 0 | 1 | 4  | 0  | 2 |
| 20 | 3  | 0 | 2 | 1  | 5  | 0 |
| 11 | 3  | 2 | 1 | 4  | 4  | 2 |
| 13 | 2  | 2 | 2 | 2  | 3  | 2 |
| 3  | 1  | 3 | 2 | 6  | 8  | 1 |
| 15 | 0  | 1 | 0 | 1  | 1  | 1 |
| 43 | 1  | 0 | 0 | 5  | 1  | 5 |
| 6  | 0  | 0 | 1 | 1  | 1  | 1 |
| 8  | 3  | 1 | 1 | 3  | 0  | 0 |
| 54 | 0  | 0 | 0 | 2  | 0  | 2 |
| 24 | 0  | 0 | 1 | 6  | 0  | 2 |
| 0  | 1  | 1 | 3 | 0  | 5  | 0 |
| 1  | 0  | 1 | 0 | 4  | 7  | 2 |
| 2  | 4  | 2 | 0 | 6  | 2  | 1 |
| 0  | 3  | 1 | 0 | 7  | 4  | 4 |
| 5  | 2  | 1 | 2 | 3  | 9  | 1 |
| 38 | 0  | 0 | 0 | 2  | 0  | 0 |
| 17 | 1  | 0 | 0 | 1  | 0  | 1 |
| 6  | 1  | 2 | 2 | 3  | 0  | 0 |
| 3  | 0  | 2 | 1 | 2  | 4  | 0 |
| 11 | 2  | 3 | 0 | 2  | 4  | 0 |

|    |   |   |   |   |    |    |
|----|---|---|---|---|----|----|
| 1  | 2 | 2 | 0 | 2 | 14 | 0  |
| 1  | 0 | 3 | 1 | 3 | 4  | 2  |
| 0  | 1 | 1 | 1 | 7 | 2  | 1  |
| 3  | 1 | 1 | 1 | 1 | 3  | 0  |
| 18 | 0 | 3 | 0 | 2 | 1  | 3  |
| 3  | 1 | 3 | 1 | 2 | 6  | 1  |
| 1  | 0 | 1 | 0 | 0 | 5  | 0  |
| 17 | 0 | 0 | 0 | 2 | 1  | 0  |
| 0  | 1 | 2 | 1 | 0 | 3  | 0  |
| 8  | 2 | 0 | 2 | 5 | 7  | 0  |
| 2  | 2 | 1 | 0 | 2 | 4  | 0  |
| 3  | 4 | 2 | 1 | 5 | 6  | 2  |
| 7  | 0 | 2 | 1 | 4 | 2  | 2  |
| 1  | 0 | 2 | 1 | 2 | 0  | 2  |
| 10 | 0 | 1 | 4 | 0 | 4  | 3  |
| 6  | 3 | 1 | 1 | 2 | 1  | 0  |
| 0  | 2 | 0 | 1 | 1 | 3  | 0  |
| 0  | 2 | 3 | 1 | 3 | 3  | 0  |
| 20 | 0 | 0 | 0 | 2 | 2  | 13 |
| 23 | 0 | 0 | 1 | 2 | 0  | 0  |
| 3  | 0 | 9 | 3 | 1 | 0  | 1  |
| 4  | 0 | 2 | 2 | 4 | 0  | 0  |
| 5  | 1 | 1 | 1 | 3 | 0  | 1  |
| 2  | 1 | 2 | 1 | 1 | 2  | 0  |
| 2  | 2 | 2 | 1 | 5 | 1  | 2  |
| 9  | 1 | 2 | 0 | 7 | 2  | 0  |
| 5  | 1 | 6 | 2 | 2 | 2  | 0  |
| 2  | 1 | 2 | 0 | 1 | 0  | 0  |
| 9  | 0 | 1 | 1 | 7 | 4  | 1  |
| 2  | 0 | 0 | 1 | 3 | 1  | 0  |
| 6  | 1 | 2 | 2 | 3 | 4  | 1  |
| 2  | 1 | 1 | 0 | 0 | 0  | 1  |
| 2  | 0 | 0 | 1 | 0 | 2  | 1  |
| 1  | 1 | 0 | 1 | 0 | 6  | 0  |
| 5  | 3 | 1 | 1 | 1 | 1  | 0  |
| 0  | 2 | 0 | 0 | 0 | 0  | 1  |
| 4  | 0 | 2 | 1 | 4 | 1  | 1  |
| 2  | 0 | 1 | 0 | 6 | 2  | 0  |

|      |      |      |      |      |      |      |
|------|------|------|------|------|------|------|
| 0.05 | 0.73 | 0.98 | 0.95 | 0.87 | 0.42 | 0.25 |
| 26   | 8    | 1    | 2    | 4    | 14   | 18   |
| 1    | 1    | 1    | 1    | 1    | 1    | 1    |

|         |         |         |         |         |         |         |
|---------|---------|---------|---------|---------|---------|---------|
| 85      | 86      | 87      | 88      | 89      | 90      | 91      |
| 20      | 21      | 22      | 23      | 24      | 25      | 26      |
| E_48    | E_7     | E_8     | E_9     | F_40    | F_41    | F_42    |
| CHR_P   | CHR_P   | CHR_P   | CHR_P   | CHR_P   | CHR_P   | CHR_P   |
| 7479891 | 1160935 | 2099567 | 1323600 | 3571995 | 3076499 | 1136044 |
| CHR_P   | CHR_P   | CHR_P   | CHR_P   | CHR_P   | CHR_P   | CHR_P   |
| 997282  | 430892  | 567895  | 487095  | 1116571 | 1013554 | 241383  |
| 209441  | 93617   | 196075  | 92860   | 372466  | 369204  | 95275   |
| 138640  | 148736  | 270305  | 150760  | 144769  | 367770  | 14583   |
| 352710  | 30353   | 113550  | 79014   | 173851  | 170780  | 142685  |
| 246250  | 82596   | 155876  | 85452   | 187609  | 167992  | 65057   |

|         |       |        |       |        |        |       |
|---------|-------|--------|-------|--------|--------|-------|
| 1441458 | 38241 | 80210  | 45678 | 265139 | 98721  | 59034 |
| 350839  | 69449 | 163721 | 80719 | 154960 | 157746 | 44478 |
| 1126803 | 15818 | 9548   | 3869  | 67671  | 13031  | 23608 |
| 268023  | 24670 | 55580  | 23927 | 105923 | 72153  | 21383 |
| 179239  | 17073 | 30178  | 26587 | 104997 | 54674  | 42363 |
| 96561   | 6552  | 22873  | 20929 | 47605  | 26249  | 28124 |
| 90006   | 20378 | 39596  | 18875 | 47949  | 43533  | 16743 |
| 151565  | 4948  | 31680  | 16258 | 45264  | 32383  | 56843 |
| 56920   | 9117  | 18724  | 14550 | 23025  | 27635  | 12557 |
| 240590  | 2835  | 13374  | 4201  | 59787  | 11354  | 52887 |
| 21272   | 10259 | 19506  | 12243 | 13077  | 24806  | 7630  |
| 140819  | 3697  | 21576  | 5753  | 49007  | 14030  | 13898 |
| 56091   | 7747  | 16607  | 7422  | 42871  | 22011  | 11271 |
| 60966   | 8106  | 13417  | 6278  | 35265  | 18210  | 6886  |
| 23674   | 7861  | 13955  | 6599  | 35791  | 18606  | 4800  |
| 35615   | 5428  | 11601  | 4615  | 30985  | 15512  | 7157  |
| 27571   | 3104  | 8290   | 5474  | 15659  | 11635  | 6148  |
| 41399   | 2483  | 9850   | 5079  | 41393  | 10738  | 7328  |
| 30680   | 5398  | 11011  | 3173  | 22523  | 23870  | 7963  |
| 59425   | 1975  | 7215   | 2028  | 30065  | 8975   | 23658 |
| 26419   | 6156  | 14455  | 7456  | 21998  | 15343  | 2634  |
| 15113   | 5195  | 7325   | 5344  | 8119   | 10887  | 6897  |
| 58871   | 602   | 2808   | 3748  | 16981  | 4214   | 16425 |
| 36799   | 5374  | 8404   | 7902  | 10130  | 15437  | 4288  |
| 12463   | 3316  | 8131   | 4344  | 13042  | 12622  | 3104  |
| 18471   | 6800  | 10459  | 4813  | 20057  | 13608  | 1778  |
| 20715   | 2173  | 6876   | 3633  | 7891   | 10504  | 6304  |
| 88289   | 2238  | 5921   | 2503  | 8198   | 5449   | 4144  |
| 86977   | 400   | 1536   | 507   | 13168  | 1871   | 3973  |
| 33597   | 5072  | 7830   | 7291  | 9354   | 14606  | 3939  |
| 12579   | 2375  | 4735   | 5382  | 6126   | 9559   | 1804  |
| 16360   | 4499  | 3898   | 2305  | 11683  | 5682   | 2563  |
| 14919   | 1807  | 4669   | 2725  | 9688   | 5919   | 3708  |
| 5546    | 1572  | 4467   | 2886  | 9818   | 4133   | 1843  |
| 7478    | 3962  | 3780   | 1108  | 6009   | 7634   | 2383  |
| 3516    | 3040  | 4636   | 2942  | 5063   | 7426   | 563   |
| 6831    | 2074  | 4725   | 2355  | 7359   | 5694   | 2415  |
| 7229    | 3507  | 4286   | 3015  | 3652   | 8135   | 945   |
| 63328   | 462   | 795    | 435   | 5207   | 1104   | 8344  |
| 7620    | 3969  | 6665   | 2790  | 3222   | 6505   | 1015  |
| 5820    | 2660  | 4605   | 2146  | 6160   | 5870   | 861   |
| 8264    | 1795  | 3923   | 1942  | 5275   | 5637   | 1408  |
| 4060    | 1890  | 2452   | 1926  | 4581   | 3481   | 1159  |
| 81989   | 101   | 608    | 528   | 411    | 357    | 1106  |
| 20102   | 1531  | 1660   | 560   | 10454  | 1263   | 3912  |
| 1234    | 577   | 2301   | 353   | 1459   | 1227   | 726   |
| 4450    | 1324  | 2938   | 1110  | 4484   | 4212   | 869   |
| 2965    | 997   | 1626   | 1168  | 2419   | 3051   | 573   |
| 5283    | 1007  | 2207   | 865   | 8034   | 3130   | 2145  |
| 14583   | 910   | 2869   | 901   | 4326   | 1250   | 894   |
| 52418   | 90    | 206    | 122   | 813    | 188    | 596   |
| 5085    | 1265  | 1894   | 1268  | 2534   | 3161   | 456   |
| 5368    | 1543  | 3472   | 985   | 3668   | 2730   | 1781  |
| 2898    | 641   | 2239   | 1399  | 3604   | 3307   | 980   |
| 866     | 2086  | 1142   | 1136  | 695    | 4455   | 592   |
| 1891    | 892   | 1525   | 788   | 1996   | 2164   | 364   |
| 4266    | 1013  | 1840   | 524   | 3786   | 1964   | 1108  |
| 19160   | 99    | 206    | 119   | 777    | 301    | 231   |
| 41406   | 87    | 159    | 86    | 157    | 188    | 82    |

|       |     |      |      |      |      |      |
|-------|-----|------|------|------|------|------|
| 2546  | 820 | 711  | 1147 | 1402 | 1428 | 847  |
| 8508  | 410 | 948  | 453  | 2657 | 1395 | 620  |
| 12660 | 445 | 1045 | 449  | 2256 | 962  | 279  |
| 17584 | 183 | 487  | 218  | 1561 | 626  | 1137 |
| 4640  | 623 | 1575 | 572  | 2504 | 2208 | 480  |
| 2545  | 125 | 676  | 1280 | 2557 | 1669 | 449  |
| 930   | 780 | 1069 | 561  | 1379 | 1561 | 138  |
| 1742  | 576 | 636  | 801  | 1705 | 1845 | 568  |
| 11559 | 100 | 330  | 140  | 1884 | 326  | 1700 |
| 3626  | 376 | 782  | 409  | 3583 | 1678 | 754  |
| 3297  | 760 | 2173 | 786  | 2036 | 2754 | 430  |
| 1374  | 177 | 654  | 101  | 642  | 530  | 748  |
| 2498  | 601 | 1074 | 495  | 1963 | 1290 | 471  |
| 1156  | 750 | 499  | 320  | 672  | 2716 | 279  |
| 789   | 441 | 690  | 278  | 1062 | 1337 | 379  |
| 660   | 494 | 727  | 366  | 980  | 1232 | 90   |
| 3532  | 470 | 797  | 751  | 900  | 1439 | 377  |
| 864   | 601 | 820  | 391  | 1207 | 1255 | 185  |
| 1466  | 481 | 584  | 586  | 1104 | 1268 | 265  |
| 5159  | 37  | 445  | 91   | 692  | 243  | 161  |
| 3665  | 418 | 946  | 336  | 962  | 1254 | 472  |
| 827   | 608 | 604  | 349  | 641  | 988  | 39   |
| 684   | 436 | 482  | 357  | 679  | 1179 | 115  |
| 5400  | 270 | 480  | 154  | 882  | 601  | 373  |
| 1873  | 430 | 823  | 406  | 1734 | 1317 | 320  |
| 579   | 311 | 493  | 223  | 491  | 1415 | 640  |
| 784   | 400 | 556  | 0    | 1298 | 985  | 445  |
| 17637 | 14  | 42   | 35   | 23   | 50   | 8    |
| 1639  | 369 | 883  | 293  | 784  | 656  | 198  |
| 1658  | 319 | 492  | 301  | 769  | 719  | 59   |
| 6124  | 144 | 209  | 122  | 729  | 266  | 118  |
| 1795  | 220 | 539  | 120  | 964  | 600  | 216  |
| 343   | 284 | 379  | 220  | 924  | 686  | 159  |
| 661   | 255 | 377  | 326  | 639  | 474  | 235  |
| 358   | 274 | 467  | 223  | 784  | 816  | 235  |
| 4941  | 51  | 94   | 43   | 997  | 155  | 367  |
| 414   | 261 | 303  | 99   | 547  | 740  | 11   |
| 1011  | 283 | 631  | 254  | 1150 | 929  | 107  |
| 423   | 191 | 358  | 245  | 392  | 625  | 151  |
| 1224  | 124 | 481  | 76   | 384  | 375  | 640  |
| 2474  | 144 | 207  | 166  | 798  | 328  | 71   |
| 3901  | 82  | 134  | 63   | 821  | 151  | 316  |
| 292   | 318 | 354  | 184  | 377  | 500  | 27   |
| 677   | 212 | 458  | 253  | 663  | 825  | 127  |
| 3702  | 102 | 225  | 132  | 358  | 334  | 195  |
| 2947  | 161 | 197  | 99   | 501  | 265  | 339  |
| 1928  | 210 | 442  | 97   | 1018 | 383  | 246  |
| 447   | 221 | 443  | 173  | 610  | 697  | 121  |
| 140   | 324 | 260  | 113  | 422  | 546  | 23   |
| 2359  | 68  | 146  | 94   | 485  | 245  | 182  |
| 1010  | 134 | 410  | 250  | 439  | 587  | 50   |
| 376   | 78  | 235  | 178  | 322  | 315  | 200  |
| 653   | 180 | 220  | 114  | 270  | 504  | 418  |
| 849   | 109 | 251  | 82   | 386  | 268  | 113  |
| 849   | 109 | 251  | 82   | 386  | 268  | 113  |
| 178   | 126 | 148  | 98   | 245  | 281  | 35   |
| 326   | 120 | 235  | 184  | 186  | 266  | 29   |
| 236   | 103 | 264  | 140  | 405  | 465  | 42   |
| 1198  | 32  | 241  | 24   | 248  | 77   | 199  |

|      |     |     |     |     |     |     |
|------|-----|-----|-----|-----|-----|-----|
| 625  | 120 | 213 | 96  | 806 | 222 | 284 |
| 3914 | 21  | 31  | 19  | 70  | 51  | 14  |
| 245  | 81  | 151 | 115 | 238 | 369 | 89  |
| 224  | 151 | 261 | 162 | 132 | 317 | 66  |
| 278  | 167 | 294 | 109 | 354 | 309 | 20  |
| 161  | 134 | 171 | 77  | 190 | 393 | 47  |
| 176  | 34  | 159 | 115 | 319 | 298 | 107 |
| 1273 | 37  | 72  | 50  | 266 | 357 | 34  |
| 294  | 139 | 241 | 123 | 299 | 299 | 22  |
| 303  | 228 | 130 | 57  | 116 | 357 | 60  |
| 205  | 170 | 162 | 82  | 285 | 406 | 21  |
| 1564 | 57  | 195 | 52  | 224 | 118 | 39  |
| 216  | 94  | 187 | 69  | 306 | 220 | 103 |
| 860  | 47  | 184 | 38  | 211 | 193 | 263 |
| 642  | 84  | 134 | 109 | 218 | 127 | 61  |
| 1010 | 102 | 212 | 111 | 144 | 235 | 152 |
| 241  | 109 | 167 | 94  | 131 | 306 | 22  |
| 395  | 77  | 167 | 90  | 161 | 131 | 85  |
| 297  | 131 | 159 | 107 | 213 | 387 | 39  |
| 181  | 77  | 118 | 38  | 112 | 143 | 18  |
| 402  | 78  | 183 | 100 | 111 | 266 | 93  |
| 2105 | 4   | 15  | 6   | 37  | 48  | 38  |
| 341  | 49  | 88  | 123 | 112 | 120 | 30  |
| 86   | 50  | 141 | 87  | 210 | 225 | 55  |
| 404  | 80  | 165 | 70  | 351 | 262 | 33  |
| 168  | 63  | 68  | 89  | 130 | 241 | 40  |
| 192  | 108 | 118 | 67  | 109 | 182 | 11  |
| 530  | 36  | 109 | 15  | 362 | 150 | 117 |
| 864  | 29  | 64  | 42  | 151 | 133 | 58  |
| 759  | 26  | 89  | 7   | 141 | 27  | 107 |
| 159  | 101 | 123 | 68  | 186 | 248 | 60  |
| 245  | 69  | 121 | 25  | 49  | 93  | 27  |
| 124  | 38  | 57  | 76  | 78  | 174 | 18  |
| 199  | 35  | 77  | 15  | 171 | 139 | 62  |
| 40   | 80  | 68  | 32  | 44  | 189 | 4   |
| 151  | 87  | 100 | 52  | 120 | 163 | 22  |
| 271  | 55  | 77  | 29  | 123 | 106 | 35  |
| 1934 | 4   | 10  | 3   | 38  | 13  | 13  |
| 74   | 33  | 90  | 45  | 143 | 181 | 16  |
| 161  | 53  | 91  | 45  | 110 | 150 | 19  |
| 640  | 30  | 84  | 24  | 278 | 102 | 42  |
| 284  | 48  | 113 | 35  | 290 | 207 | 35  |
| 116  | 48  | 77  | 73  | 78  | 100 | 27  |
| 147  | 62  | 128 | 59  | 149 | 192 | 21  |
| 33   | 37  | 50  | 13  | 37  | 52  | 8   |
| 1273 | 28  | 60  | 16  | 89  | 45  | 24  |
| 235  | 52  | 52  | 78  | 77  | 74  | 60  |
| 122  | 36  | 119 | 39  | 79  | 248 | 44  |
| 302  | 13  | 63  | 42  | 122 | 51  | 64  |
| 125  | 44  | 104 | 54  | 164 | 122 | 26  |
| 222  | 60  | 120 | 31  | 164 | 151 | 16  |
| 460  | 48  | 85  | 30  | 319 | 103 | 47  |
| 120  | 56  | 98  | 43  | 76  | 78  | 8   |
| 95   | 12  | 49  | 18  | 14  | 25  | 22  |
| 418  | 38  | 84  | 20  | 259 | 106 | 49  |
| 151  | 70  | 81  | 24  | 127 | 90  | 10  |
| 91   | 21  | 50  | 16  | 29  | 40  | 10  |
| 190  | 5   | 67  | 0   | 79  | 174 | 21  |
| 573  | 18  | 43  | 14  | 203 | 50  | 111 |

|      |     |     |    |     |     |     |
|------|-----|-----|----|-----|-----|-----|
| 23   | 10  | 45  | 13 | 16  | 16  | 19  |
| 466  | 28  | 40  | 14 | 235 | 66  | 37  |
| 22   | 22  | 39  | 21 | 57  | 85  | 9   |
| 91   | 32  | 59  | 35 | 70  | 88  | 29  |
| 543  | 17  | 42  | 14 | 192 | 48  | 104 |
| 51   | 12  | 58  | 6  | 38  | 18  | 37  |
| 76   | 94  | 33  | 50 | 49  | 96  | 20  |
| 165  | 22  | 49  | 29 | 154 | 142 | 31  |
| 11   | 48  | 58  | 75 | 2   | 104 | 0   |
| 297  | 21  | 9   | 1  | 116 | 16  | 14  |
| 89   | 47  | 69  | 25 | 139 | 93  | 29  |
| 34   | 39  | 53  | 52 | 87  | 69  | 49  |
| 109  | 27  | 34  | 33 | 96  | 109 | 11  |
| 121  | 108 | 108 | 79 | 48  | 130 | 20  |
| 1148 | 34  | 54  | 5  | 142 | 20  | 80  |
| 237  | 20  | 17  | 24 | 111 | 33  | 25  |
| 64   | 34  | 46  | 25 | 63  | 53  | 4   |
| 235  | 10  | 53  | 51 | 147 | 94  | 24  |
| 109  | 53  | 88  | 19 | 70  | 114 | 26  |
| 57   | 28  | 12  | 23 | 61  | 87  | 4   |
| 108  | 29  | 45  | 21 | 100 | 73  | 18  |
| 61   | 18  | 43  | 39 | 118 | 73  | 25  |
| 551  | 12  | 28  | 10 | 81  | 30  | 15  |
| 46   | 14  | 80  | 8  | 23  | 35  | 19  |
| 170  | 33  | 42  | 35 | 83  | 107 | 19  |
| 70   | 32  | 75  | 22 | 72  | 80  | 3   |
| 17   | 76  | 18  | 14 | 36  | 78  | 8   |
| 190  | 29  | 43  | 33 | 32  | 51  | 30  |
| 73   | 42  | 68  | 42 | 55  | 124 | 20  |
| 48   | 27  | 71  | 28 | 107 | 114 | 19  |
| 489  | 4   | 40  | 5  | 84  | 17  | 81  |
| 64   | 40  | 26  | 37 | 36  | 37  | 3   |
| 356  | 24  | 46  | 27 | 123 | 38  | 6   |
| 56   | 34  | 46  | 24 | 123 | 88  | 12  |
| 140  | 38  | 45  | 30 | 100 | 97  | 20  |
| 120  | 32  | 56  | 19 | 97  | 57  | 27  |
| 1485 | 0   | 1   | 3  | 13  | 4   | 9   |
| 110  | 22  | 52  | 13 | 72  | 72  | 23  |
| 84   | 46  | 58  | 1  | 65  | 19  | 4   |
| 52   | 22  | 38  | 36 | 30  | 47  | 3   |
| 178  | 26  | 61  | 0  | 50  | 71  | 11  |
| 41   | 11  | 30  | 12 | 52  | 29  | 3   |
| 34   | 9   | 56  | 3  | 25  | 10  | 10  |
| 40   | 29  | 29  | 24 | 32  | 35  | 16  |
| 60   | 15  | 52  | 24 | 45  | 64  | 40  |
| 67   | 10  | 57  | 26 | 18  | 37  | 5   |
| 37   | 22  | 25  | 11 | 21  | 61  | 8   |
| 76   | 16  | 34  | 22 | 37  | 62  | 14  |
| 166  | 11  | 13  | 9  | 81  | 27  | 9   |
| 67   | 20  | 25  | 26 | 59  | 33  | 8   |
| 598  | 2   | 2   | 2  | 21  | 8   | 9   |
| 29   | 20  | 17  | 16 | 30  | 70  | 3   |
| 179  | 24  | 41  | 23 | 43  | 39  | 5   |
| 54   | 13  | 34  | 25 | 24  | 90  | 3   |
| 47   | 31  | 26  | 33 | 34  | 77  | 4   |
| 163  | 8   | 42  | 5  | 70  | 54  | 15  |
| 84   | 21  | 24  | 6  | 55  | 51  | 23  |
| 66   | 21  | 31  | 22 | 61  | 82  | 3   |
| 59   | 1   | 23  | 4  | 12  | 12  | 10  |

|     |    |    |    |     |    |    |
|-----|----|----|----|-----|----|----|
| 112 | 14 | 42 | 11 | 55  | 40 | 3  |
| 259 | 3  | 8  | 2  | 117 | 24 | 35 |
| 75  | 23 | 31 | 17 | 64  | 57 | 11 |
| 75  | 23 | 31 | 17 | 64  | 57 | 11 |
| 14  | 2  | 16 | 4  | 8   | 13 | 6  |
| 62  | 13 | 32 | 28 | 29  | 39 | 3  |
| 117 | 21 | 16 | 15 | 32  | 62 | 6  |
| 52  | 7  | 44 | 4  | 14  | 20 | 13 |
| 89  | 18 | 42 | 20 | 57  | 52 | 5  |
| 32  | 13 | 36 | 8  | 48  | 57 | 6  |
| 90  | 3  | 19 | 19 | 51  | 18 | 17 |
| 78  | 10 | 19 | 33 | 19  | 46 | 11 |
| 54  | 11 | 32 | 13 | 30  | 38 | 12 |
| 51  | 14 | 34 | 11 | 100 | 37 | 19 |
| 50  | 6  | 8  | 10 | 19  | 24 | 9  |
| 54  | 37 | 25 | 11 | 10  | 33 | 13 |
| 55  | 12 | 22 | 14 | 28  | 51 | 10 |
| 499 | 0  | 0  | 2  | 4   | 3  | 0  |
| 47  | 14 | 32 | 14 | 28  | 39 | 8  |
| 61  | 10 | 19 | 12 | 69  | 31 | 14 |
| 44  | 15 | 36 | 19 | 38  | 54 | 22 |
| 40  | 10 | 5  | 21 | 17  | 20 | 5  |
| 55  | 10 | 17 | 11 | 63  | 29 | 11 |
| 13  | 16 | 20 | 8  | 13  | 40 | 4  |
| 46  | 16 | 26 | 14 | 6   | 39 | 11 |
| 105 | 9  | 31 | 14 | 46  | 28 | 3  |
| 44  | 8  | 18 | 23 | 19  | 32 | 9  |
| 584 | 1  | 0  | 0  | 1   | 1  | 1  |
| 22  | 16 | 33 | 20 | 12  | 29 | 12 |
| 26  | 16 | 11 | 17 | 13  | 10 | 1  |
| 57  | 12 | 20 | 13 | 16  | 28 | 7  |
| 17  | 6  | 18 | 6  | 8   | 21 | 4  |
| 79  | 6  | 20 | 5  | 54  | 13 | 26 |
| 562 | 1  | 1  | 1  | 5   | 0  | 45 |
| 28  | 9  | 15 | 11 | 12  | 51 | 4  |
| 51  | 7  | 19 | 1  | 41  | 14 | 10 |
| 0   | 53 | 0  | 0  | 0   | 0  | 0  |
| 34  | 23 | 31 | 13 | 14  | 36 | 7  |
| 14  | 7  | 3  | 12 | 48  | 29 | 8  |
| 21  | 9  | 9  | 8  | 25  | 20 | 5  |
| 21  | 2  | 8  | 6  | 4   | 13 | 3  |
| 31  | 5  | 17 | 6  | 23  | 17 | 11 |
| 15  | 3  | 15 | 6  | 11  | 5  | 15 |
| 31  | 10 | 17 | 17 | 24  | 42 | 2  |
| 12  | 15 | 8  | 9  | 16  | 21 | 3  |
| 11  | 10 | 13 | 15 | 20  | 35 | 4  |
| 39  | 7  | 18 | 1  | 36  | 14 | 8  |
| 11  | 2  | 19 | 4  | 13  | 1  | 5  |
| 199 | 1  | 0  | 2  | 5   | 3  | 19 |
| 199 | 8  | 20 | 4  | 19  | 6  | 8  |
| 29  | 8  | 23 | 17 | 44  | 27 | 13 |
| 11  | 12 | 19 | 7  | 24  | 19 | 2  |
| 53  | 3  | 13 | 7  | 30  | 11 | 7  |
| 12  | 14 | 25 | 7  | 18  | 19 | 4  |
| 20  | 2  | 16 | 3  | 5   | 8  | 11 |
| 97  | 7  | 13 | 7  | 41  | 10 | 16 |
| 28  | 12 | 6  | 3  | 23  | 11 | 13 |
| 67  | 12 | 20 | 7  | 22  | 35 | 2  |
| 17  | 12 | 16 | 7  | 15  | 19 | 4  |

|     |    |    |    |    |    |    |
|-----|----|----|----|----|----|----|
| 22  | 4  | 15 | 1  | 11 | 5  | 0  |
| 13  | 3  | 14 | 2  | 4  | 9  | 4  |
| 34  | 4  | 27 | 10 | 20 | 26 | 3  |
| 20  | 6  | 12 | 10 | 22 | 24 | 5  |
| 28  | 8  | 6  | 7  | 4  | 19 | 5  |
| 52  | 7  | 9  | 3  | 51 | 11 | 6  |
| 34  | 8  | 24 | 5  | 24 | 29 | 7  |
| 11  | 11 | 18 | 7  | 8  | 23 | 0  |
| 6   | 4  | 11 | 7  | 9  | 16 | 2  |
| 9   | 4  | 18 | 4  | 13 | 32 | 2  |
| 22  | 11 | 18 | 7  | 24 | 26 | 1  |
| 28  | 6  | 10 | 8  | 28 | 12 | 14 |
| 167 | 3  | 8  | 2  | 29 | 2  | 28 |
| 128 | 1  | 6  | 5  | 38 | 10 | 2  |
| 65  | 6  | 4  | 2  | 24 | 12 | 10 |
| 41  | 5  | 11 | 7  | 21 | 25 | 6  |
| 9   | 5  | 10 | 6  | 8  | 15 | 1  |
| 20  | 11 | 11 | 2  | 17 | 5  | 3  |
| 21  | 7  | 18 | 9  | 25 | 18 | 1  |
| 33  | 7  | 14 | 12 | 7  | 14 | 6  |
| 13  | 5  | 9  | 10 | 13 | 23 | 9  |
| 88  | 5  | 7  | 3  | 28 | 9  | 7  |
| 22  | 6  | 13 | 3  | 32 | 17 | 10 |
| 7   | 0  | 20 | 0  | 4  | 10 | 4  |
| 3   | 15 | 5  | 12 | 20 | 35 | 3  |
| 12  | 4  | 17 | 3  | 9  | 10 | 8  |
| 1   | 4  | 12 | 0  | 15 | 9  | 1  |
| 25  | 5  | 15 | 13 | 10 | 14 | 3  |
| 52  | 3  | 10 | 4  | 9  | 7  | 10 |
| 12  | 5  | 3  | 6  | 6  | 13 | 0  |
| 13  | 2  | 19 | 1  | 14 | 21 | 6  |
| 8   | 5  | 11 | 3  | 3  | 11 | 2  |
| 143 | 3  | 3  | 2  | 0  | 2  | 0  |
| 8   | 9  | 5  | 8  | 6  | 13 | 1  |
| 97  | 3  | 9  | 3  | 20 | 11 | 13 |
| 33  | 8  | 10 | 11 | 5  | 6  | 4  |
| 24  | 7  | 8  | 2  | 37 | 17 | 9  |
| 9   | 4  | 14 | 3  | 22 | 27 | 0  |
| 67  | 5  | 4  | 3  | 27 | 27 | 2  |
| 35  | 3  | 6  | 7  | 21 | 5  | 4  |
| 11  | 5  | 7  | 3  | 12 | 14 | 7  |
| 6   | 11 | 3  | 7  | 8  | 20 | 4  |
| 45  | 4  | 9  | 4  | 42 | 20 | 6  |
| 10  | 7  | 7  | 3  | 12 | 15 | 1  |
| 8   | 1  | 11 | 11 | 20 | 10 | 6  |
| 12  | 11 | 3  | 7  | 8  | 15 | 1  |
| 11  | 6  | 6  | 3  | 10 | 12 | 1  |
| 113 | 1  | 1  | 0  | 6  | 3  | 7  |
| 34  | 4  | 7  | 6  | 15 | 8  | 6  |
| 9   | 2  | 17 | 6  | 13 | 16 | 4  |
| 4   | 8  | 7  | 4  | 15 | 10 | 0  |
| 34  | 8  | 7  | 2  | 18 | 10 | 3  |
| 12  | 2  | 5  | 9  | 8  | 7  | 6  |
| 65  | 1  | 3  | 0  | 19 | 1  | 1  |
| 8   | 7  | 12 | 3  | 14 | 4  | 7  |
| 22  | 3  | 11 | 1  | 14 | 6  | 2  |
| 15  | 7  | 16 | 0  | 13 | 11 | 2  |
| 13  | 4  | 4  | 7  | 12 | 17 | 5  |
| 55  | 3  | 6  | 0  | 17 | 2  | 0  |



|     |    |    |   |    |    |    |
|-----|----|----|---|----|----|----|
| 10  | 2  | 12 | 3 | 8  | 13 | 0  |
| 34  | 4  | 7  | 2 | 22 | 8  | 4  |
| 15  | 6  | 4  | 2 | 20 | 12 | 1  |
| 13  | 4  | 18 | 6 | 6  | 23 | 7  |
| 11  | 4  | 5  | 3 | 10 | 7  | 0  |
| 17  | 5  | 6  | 9 | 4  | 3  | 0  |
| 8   | 1  | 5  | 1 | 9  | 6  | 4  |
| 51  | 4  | 2  | 1 | 38 | 5  | 7  |
| 59  | 2  | 1  | 2 | 18 | 3  | 1  |
| 7   | 7  | 7  | 3 | 5  | 6  | 6  |
| 22  | 3  | 11 | 6 | 10 | 13 | 1  |
| 4   | 1  | 4  | 5 | 8  | 14 | 0  |
| 11  | 2  | 14 | 6 | 12 | 11 | 5  |
| 30  | 2  | 13 | 7 | 11 | 8  | 2  |
| 9   | 5  | 11 | 6 | 6  | 11 | 0  |
| 94  | 2  | 4  | 3 | 12 | 4  | 1  |
| 3   | 0  | 2  | 2 | 0  | 3  | 2  |
| 21  | 4  | 5  | 1 | 18 | 13 | 1  |
| 10  | 4  | 3  | 1 | 8  | 12 | 5  |
| 2   | 6  | 8  | 3 | 7  | 5  | 0  |
| 5   | 2  | 10 | 1 | 9  | 4  | 1  |
| 6   | 3  | 8  | 2 | 10 | 6  | 4  |
| 17  | 5  | 19 | 7 | 6  | 17 | 0  |
| 2   | 1  | 7  | 1 | 4  | 3  | 1  |
| 6   | 14 | 3  | 2 | 10 | 13 | 2  |
| 6   | 5  | 11 | 5 | 7  | 16 | 1  |
| 6   | 3  | 2  | 2 | 13 | 7  | 2  |
| 8   | 5  | 10 | 4 | 9  | 16 | 0  |
| 5   | 3  | 2  | 1 | 8  | 5  | 1  |
| 17  | 2  | 5  | 0 | 9  | 5  | 4  |
| 41  | 5  | 3  | 0 | 41 | 3  | 0  |
| 7   | 1  | 4  | 0 | 3  | 5  | 1  |
| 10  | 2  | 16 | 3 | 2  | 1  | 1  |
| 49  | 2  | 4  | 1 | 12 | 4  | 1  |
| 2   | 4  | 3  | 0 | 7  | 16 | 0  |
| 5   | 4  | 5  | 3 | 5  | 8  | 3  |
| 30  | 0  | 0  | 1 | 8  | 5  | 8  |
| 20  | 4  | 10 | 2 | 8  | 4  | 2  |
| 1   | 5  | 5  | 5 | 8  | 5  | 1  |
| 4   | 7  | 2  | 0 | 5  | 11 | 0  |
| 36  | 2  | 0  | 2 | 8  | 4  | 0  |
| 5   | 4  | 4  | 3 | 5  | 2  | 2  |
| 19  | 2  | 6  | 0 | 19 | 4  | 10 |
| 15  | 0  | 5  | 1 | 8  | 0  | 4  |
| 3   | 4  | 5  | 1 | 3  | 3  | 5  |
| 4   | 2  | 2  | 1 | 2  | 9  | 5  |
| 7   | 1  | 2  | 6 | 5  | 4  | 0  |
| 10  | 2  | 7  | 3 | 6  | 7  | 4  |
| 10  | 4  | 4  | 3 | 2  | 5  | 0  |
| 10  | 0  | 4  | 3 | 6  | 3  | 2  |
| 30  | 3  | 2  | 1 | 19 | 2  | 4  |
| 78  | 0  | 3  | 1 | 2  | 4  | 2  |
| 125 | 0  | 0  | 0 | 1  | 0  | 1  |
| 42  | 2  | 8  | 3 | 9  | 6  | 1  |
| 2   | 1  | 2  | 2 | 3  | 3  | 1  |
| 3   | 0  | 3  | 0 | 6  | 3  | 2  |
| 6   | 1  | 3  | 6 | 2  | 8  | 1  |
| 3   | 3  | 0  | 4 | 3  | 4  | 0  |
| 64  | 0  | 0  | 0 | 0  | 0  | 0  |

|    |    |    |   |    |    |    |
|----|----|----|---|----|----|----|
| 22 | 0  | 5  | 0 | 1  | 2  | 12 |
| 9  | 0  | 4  | 0 | 2  | 1  | 2  |
| 30 | 0  | 6  | 0 | 11 | 3  | 2  |
| 2  | 7  | 3  | 2 | 7  | 15 | 1  |
| 8  | 4  | 3  | 1 | 1  | 17 | 3  |
| 12 | 0  | 3  | 2 | 2  | 7  | 0  |
| 64 | 0  | 1  | 0 | 8  | 0  | 2  |
| 13 | 3  | 11 | 5 | 2  | 4  | 0  |
| 7  | 2  | 2  | 1 | 22 | 7  | 4  |
| 16 | 5  | 2  | 3 | 3  | 11 | 0  |
| 8  | 3  | 5  | 2 | 10 | 6  | 2  |
| 75 | 2  | 0  | 1 | 3  | 1  | 1  |
| 8  | 4  | 1  | 1 | 12 | 7  | 0  |
| 7  | 1  | 1  | 0 | 8  | 7  | 1  |
| 5  | 0  | 4  | 1 | 2  | 8  | 3  |
| 10 | 0  | 4  | 1 | 10 | 5  | 3  |
| 2  | 2  | 3  | 1 | 5  | 5  | 1  |
| 4  | 0  | 7  | 0 | 3  | 5  | 0  |
| 15 | 3  | 1  | 2 | 6  | 1  | 0  |
| 4  | 4  | 7  | 1 | 9  | 4  | 1  |
| 5  | 1  | 3  | 1 | 1  | 0  | 1  |
| 50 | 0  | 0  | 1 | 0  | 0  | 0  |
| 10 | 5  | 4  | 1 | 10 | 6  | 3  |
| 1  | 1  | 3  | 1 | 9  | 3  | 1  |
| 16 | 1  | 7  | 0 | 9  | 7  | 0  |
| 8  | 1  | 4  | 2 | 9  | 6  | 0  |
| 40 | 1  | 5  | 1 | 2  | 0  | 0  |
| 14 | 0  | 1  | 1 | 13 | 3  | 5  |
| 6  | 4  | 2  | 1 | 4  | 9  | 0  |
| 7  | 2  | 5  | 1 | 6  | 5  | 0  |
| 3  | 1  | 2  | 3 | 3  | 7  | 1  |
| 3  | 0  | 1  | 1 | 5  | 5  | 5  |
| 18 | 1  | 2  | 2 | 5  | 4  | 1  |
| 10 | 0  | 1  | 1 | 2  | 1  | 0  |
| 8  | 2  | 1  | 4 | 6  | 3  | 2  |
| 8  | 3  | 5  | 1 | 6  | 7  | 0  |
| 8  | 2  | 1  | 1 | 7  | 5  | 3  |
| 5  | 1  | 1  | 2 | 1  | 3  | 0  |
| 1  | 2  | 1  | 1 | 0  | 2  | 4  |
| 2  | 1  | 1  | 2 | 0  | 2  | 0  |
| 3  | 3  | 1  | 1 | 0  | 3  | 0  |
| 5  | 1  | 2  | 1 | 1  | 4  | 2  |
| 0  | 2  | 3  | 4 | 5  | 4  | 3  |
| 5  | 1  | 4  | 0 | 4  | 2  | 0  |
| 10 | 1  | 2  | 2 | 5  | 10 | 0  |
| 25 | 0  | 0  | 0 | 2  | 1  | 2  |
| 9  | 1  | 4  | 0 | 0  | 3  | 0  |
| 32 | 3  | 3  | 0 | 4  | 2  | 0  |
| 4  | 5  | 4  | 2 | 5  | 7  | 3  |
| 16 | 1  | 2  | 0 | 2  | 1  | 3  |
| 15 | 10 | 3  | 2 | 6  | 2  | 0  |
| 11 | 0  | 2  | 0 | 1  | 3  | 0  |
| 23 | 0  | 0  | 1 | 4  | 0  | 2  |
| 20 | 3  | 0  | 2 | 1  | 5  | 0  |
| 11 | 3  | 2  | 1 | 4  | 4  | 2  |
| 13 | 2  | 2  | 2 | 2  | 3  | 2  |
| 3  | 1  | 3  | 2 | 6  | 8  | 1  |
| 15 | 0  | 1  | 0 | 1  | 1  | 1  |
| 43 | 1  | 0  | 0 | 5  | 1  | 5  |



|         |         |         |         |         |         |         |
|---------|---------|---------|---------|---------|---------|---------|
| 85      | 86      | 87      | 88      | 89      | 90      | 91      |
| 20      | 21      | 22      | 23      | 24      | 25      | 26      |
| CHR_P   | CHR_P   | CHR_P   | CHR_P   | CHR_P   | CHR_P   | CHR_P   |
| E_48    | E_7     | E_8     | E_9     | F_40    | F_41    | F_42    |
| 7479891 | 1160935 | 2099567 | 1323600 | 3571995 | 3076499 | 1136044 |
| CHR_P   | CHR_P   | CHR_P   | CHR_P   | CHR_P   | CHR_P   | CHR_P   |
| 4.54    | 12.06   | 8.77    | 11.80   | 10.14   | 10.66   | 6.92    |
| 0.95    | 2.62    | 3.03    | 2.25    | 3.38    | 3.88    | 2.73    |
| 0.63    | 4.16    | 4.17    | 3.65    | 1.31    | 3.87    | 0.42    |
| 1.60    | 0.85    | 1.75    | 1.91    | 1.58    | 1.80    | 4.09    |
| 1.12    | 2.31    | 2.41    | 2.07    | 1.70    | 1.77    | 1.86    |
| 6.56    | 1.07    | 1.24    | 1.11    | 2.41    | 1.04    | 1.69    |
| 1.60    | 1.94    | 2.53    | 1.96    | 1.41    | 1.66    | 1.27    |
| 5.13    | 0.44    | 0.15    | 0.09    | 0.61    | 0.14    | 0.68    |
| 1.22    | 0.69    | 0.86    | 0.58    | 0.96    | 0.76    | 0.61    |
| 0.82    | 0.48    | 0.47    | 0.64    | 0.95    | 0.57    | 1.21    |
| 0.44    | 0.18    | 0.35    | 0.51    | 0.43    | 0.28    | 0.81    |
| 0.41    | 0.57    | 0.61    | 0.46    | 0.44    | 0.46    | 0.48    |
| 0.69    | 0.14    | 0.49    | 0.39    | 0.41    | 0.34    | 1.63    |
| 0.26    | 0.26    | 0.29    | 0.35    | 0.21    | 0.29    | 0.36    |
| 1.09    | 0.08    | 0.21    | 0.10    | 0.54    | 0.12    | 1.52    |
| 0.10    | 0.29    | 0.30    | 0.30    | 0.12    | 0.26    | 0.22    |
| 0.64    | 0.10    | 0.33    | 0.14    | 0.44    | 0.15    | 0.40    |
| 0.26    | 0.22    | 0.26    | 0.18    | 0.39    | 0.23    | 0.32    |
| 0.28    | 0.23    | 0.21    | 0.15    | 0.32    | 0.19    | 0.20    |
| 0.11    | 0.22    | 0.22    | 0.16    | 0.32    | 0.20    | 0.14    |
| 0.16    | 0.15    | 0.18    | 0.11    | 0.28    | 0.16    | 0.21    |
| 0.13    | 0.09    | 0.13    | 0.13    | 0.14    | 0.12    | 0.18    |
| 0.19    | 0.07    | 0.15    | 0.12    | 0.38    | 0.11    | 0.21    |
| 0.14    | 0.15    | 0.17    | 0.08    | 0.20    | 0.25    | 0.23    |
| 0.27    | 0.06    | 0.11    | 0.05    | 0.27    | 0.09    | 0.68    |
| 0.12    | 0.17    | 0.22    | 0.18    | 0.20    | 0.16    | 0.08    |
| 0.07    | 0.15    | 0.11    | 0.13    | 0.07    | 0.11    | 0.20    |
| 0.27    | 0.02    | 0.04    | 0.09    | 0.15    | 0.04    | 0.47    |
| 0.17    | 0.15    | 0.13    | 0.19    | 0.09    | 0.16    | 0.12    |
| 0.06    | 0.09    | 0.13    | 0.11    | 0.12    | 0.13    | 0.09    |
| 0.08    | 0.19    | 0.16    | 0.12    | 0.18    | 0.14    | 0.05    |
| 0.09    | 0.06    | 0.11    | 0.09    | 0.07    | 0.11    | 0.18    |
| 0.40    | 0.06    | 0.09    | 0.06    | 0.07    | 0.06    | 0.12    |
| 0.40    | 0.01    | 0.02    | 0.01    | 0.12    | 0.02    | 0.11    |
| 0.15    | 0.14    | 0.12    | 0.18    | 0.08    | 0.15    | 0.11    |
| 0.06    | 0.07    | 0.07    | 0.13    | 0.06    | 0.10    | 0.05    |
| 0.07    | 0.13    | 0.06    | 0.06    | 0.11    | 0.06    | 0.07    |
| 0.07    | 0.05    | 0.07    | 0.07    | 0.09    | 0.06    | 0.11    |
| 0.03    | 0.04    | 0.07    | 0.07    | 0.09    | 0.04    | 0.05    |
| 0.03    | 0.11    | 0.06    | 0.03    | 0.05    | 0.08    | 0.07    |
| 0.02    | 0.09    | 0.07    | 0.07    | 0.05    | 0.08    | 0.02    |
| 0.03    | 0.06    | 0.07    | 0.06    | 0.07    | 0.06    | 0.07    |
| 0.03    | 0.10    | 0.07    | 0.07    | 0.03    | 0.09    | 0.03    |
| 0.29    | 0.01    | 0.01    | 0.01    | 0.05    | 0.01    | 0.24    |
| 0.03    | 0.11    | 0.10    | 0.07    | 0.03    | 0.07    | 0.03    |
| 0.03    | 0.07    | 0.07    | 0.05    | 0.06    | 0.06    | 0.02    |
| 0.04    | 0.05    | 0.06    | 0.05    | 0.05    | 0.06    | 0.04    |
| 0.02    | 0.05    | 0.04    | 0.05    | 0.04    | 0.04    | 0.03    |
| 0.37    | 0.00    | 0.01    | 0.01    | 0.00    | 0.00    | 0.03    |
| 0.09    | 0.04    | 0.03    | 0.01    | 0.09    | 0.01    | 0.11    |
| 0.01    | 0.02    | 0.04    | 0.01    | 0.01    | 0.01    | 0.02    |
| 0.02    | 0.04    | 0.05    | 0.03    | 0.04    | 0.04    | 0.02    |

|      |      |      |      |      |      |      |
|------|------|------|------|------|------|------|
| 0.01 | 0.03 | 0.03 | 0.03 | 0.02 | 0.03 | 0.02 |
| 0.02 | 0.03 | 0.03 | 0.02 | 0.07 | 0.03 | 0.06 |
| 0.07 | 0.03 | 0.04 | 0.02 | 0.04 | 0.01 | 0.03 |
| 0.24 | 0.00 | 0.00 | 0.00 | 0.01 | 0.00 | 0.02 |
| 0.02 | 0.04 | 0.03 | 0.03 | 0.02 | 0.03 | 0.01 |
| 0.02 | 0.04 | 0.05 | 0.02 | 0.03 | 0.03 | 0.05 |
| 0.01 | 0.02 | 0.03 | 0.03 | 0.03 | 0.03 | 0.03 |
| 0.00 | 0.06 | 0.02 | 0.03 | 0.01 | 0.05 | 0.02 |
| 0.01 | 0.02 | 0.02 | 0.02 | 0.02 | 0.02 | 0.01 |
| 0.02 | 0.03 | 0.03 | 0.01 | 0.03 | 0.02 | 0.03 |
| 0.09 | 0.00 | 0.00 | 0.00 | 0.01 | 0.00 | 0.01 |
| 0.19 | 0.00 | 0.00 | 0.00 | 0.00 | 0.00 | 0.00 |
| 0.01 | 0.02 | 0.01 | 0.03 | 0.01 | 0.02 | 0.02 |
| 0.04 | 0.01 | 0.01 | 0.01 | 0.02 | 0.01 | 0.02 |
| 0.06 | 0.01 | 0.02 | 0.01 | 0.02 | 0.01 | 0.01 |
| 0.08 | 0.01 | 0.01 | 0.01 | 0.01 | 0.01 | 0.03 |
| 0.02 | 0.02 | 0.02 | 0.01 | 0.02 | 0.02 | 0.01 |
| 0.01 | 0.00 | 0.01 | 0.03 | 0.02 | 0.02 | 0.01 |
| 0.00 | 0.02 | 0.02 | 0.01 | 0.01 | 0.02 | 0.00 |
| 0.01 | 0.02 | 0.01 | 0.02 | 0.02 | 0.02 | 0.02 |
| 0.05 | 0.00 | 0.01 | 0.00 | 0.02 | 0.00 | 0.05 |
| 0.02 | 0.01 | 0.01 | 0.01 | 0.03 | 0.02 | 0.02 |
| 0.02 | 0.02 | 0.03 | 0.02 | 0.02 | 0.03 | 0.01 |
| 0.01 | 0.00 | 0.01 | 0.00 | 0.01 | 0.01 | 0.02 |
| 0.01 | 0.02 | 0.02 | 0.01 | 0.02 | 0.01 | 0.01 |
| 0.01 | 0.02 | 0.01 | 0.01 | 0.01 | 0.03 | 0.01 |
| 0.00 | 0.01 | 0.01 | 0.01 | 0.01 | 0.01 | 0.01 |
| 0.00 | 0.01 | 0.01 | 0.01 | 0.01 | 0.01 | 0.00 |
| 0.02 | 0.01 | 0.01 | 0.02 | 0.01 | 0.02 | 0.01 |
| 0.00 | 0.02 | 0.01 | 0.01 | 0.01 | 0.01 | 0.01 |
| 0.01 | 0.01 | 0.01 | 0.01 | 0.01 | 0.01 | 0.01 |
| 0.02 | 0.00 | 0.01 | 0.00 | 0.01 | 0.00 | 0.00 |
| 0.02 | 0.01 | 0.01 | 0.01 | 0.01 | 0.01 | 0.01 |
| 0.00 | 0.02 | 0.01 | 0.01 | 0.01 | 0.01 | 0.00 |
| 0.00 | 0.01 | 0.01 | 0.01 | 0.01 | 0.01 | 0.00 |
| 0.02 | 0.01 | 0.01 | 0.00 | 0.01 | 0.01 | 0.01 |
| 0.01 | 0.01 | 0.01 | 0.01 | 0.02 | 0.01 | 0.01 |
| 0.00 | 0.01 | 0.01 | 0.01 | 0.00 | 0.01 | 0.02 |
| 0.00 | 0.01 | 0.01 | 0.00 | 0.01 | 0.01 | 0.01 |
| 0.08 | 0.00 | 0.00 | 0.00 | 0.00 | 0.00 | 0.00 |
| 0.01 | 0.01 | 0.01 | 0.01 | 0.01 | 0.01 | 0.01 |
| 0.01 | 0.01 | 0.01 | 0.01 | 0.01 | 0.01 | 0.00 |
| 0.03 | 0.00 | 0.00 | 0.00 | 0.01 | 0.00 | 0.00 |
| 0.01 | 0.01 | 0.01 | 0.00 | 0.01 | 0.01 | 0.01 |
| 0.00 | 0.01 | 0.01 | 0.01 | 0.01 | 0.01 | 0.00 |
| 0.00 | 0.01 | 0.01 | 0.01 | 0.01 | 0.01 | 0.01 |
| 0.00 | 0.01 | 0.01 | 0.01 | 0.01 | 0.01 | 0.01 |
| 0.02 | 0.00 | 0.00 | 0.00 | 0.01 | 0.00 | 0.01 |
| 0.00 | 0.01 | 0.00 | 0.00 | 0.00 | 0.01 | 0.00 |
| 0.00 | 0.01 | 0.01 | 0.01 | 0.01 | 0.01 | 0.00 |
| 0.00 | 0.01 | 0.01 | 0.01 | 0.00 | 0.01 | 0.00 |
| 0.01 | 0.00 | 0.01 | 0.00 | 0.00 | 0.00 | 0.02 |
| 0.01 | 0.00 | 0.00 | 0.00 | 0.01 | 0.00 | 0.00 |
| 0.02 | 0.00 | 0.00 | 0.00 | 0.01 | 0.00 | 0.01 |
| 0.00 | 0.01 | 0.01 | 0.00 | 0.00 | 0.01 | 0.00 |
| 0.00 | 0.01 | 0.01 | 0.01 | 0.01 | 0.01 | 0.00 |
| 0.02 | 0.00 | 0.00 | 0.00 | 0.00 | 0.00 | 0.01 |
| 0.01 | 0.00 | 0.00 | 0.00 | 0.00 | 0.00 | 0.01 |
| 0.01 | 0.01 | 0.01 | 0.00 | 0.01 | 0.00 | 0.01 |









|       |       |       |       |       |       |       |
|-------|-------|-------|-------|-------|-------|-------|
| 1.25  | 0.20  | 0.53  | -0.02 | 0.74  | 0.33  | 0.04  |
| 0.14  | -0.72 | -0.75 | -0.30 | 0.50  | -0.47 | 1.16  |
| -0.12 | -1.08 | -0.44 | 0.13  | -0.15 | -0.73 | 1.26  |
| -0.74 | 0.70  | 1.07  | -0.31 | -0.50 | -0.30 | -0.11 |
| 1.91  | -1.26 | 0.76  | 0.21  | 0.31  | -0.10 | 7.32  |
| -1.20 | -1.22 | -1.02 | -0.66 | -1.48 | -1.02 | -0.62 |
| 4.03  | -0.64 | -0.06 | -0.54 | 1.49  | -0.46 | 5.96  |
| -0.87 | -0.04 | 0.02  | 0.00  | -0.77 | -0.15 | -0.34 |
| 3.05  | -0.34 | 1.11  | -0.11 | 1.81  | -0.06 | 1.52  |
| 0.40  | 0.02  | 0.41  | -0.34 | 1.72  | 0.17  | 1.07  |
| 0.86  | 0.40  | 0.23  | -0.26 | 1.24  | 0.09  | 0.14  |
| -1.22 | -0.10 | -0.15 | -0.70 | 0.94  | -0.35 | -0.93 |
| 0.08  | -0.09 | 0.35  | -0.73 | 2.00  | 0.09  | 0.77  |
| -0.40 | -0.99 | -0.36 | -0.29 | -0.14 | -0.45 | 0.38  |
| 0.86  | -0.61 | 0.41  | 0.05  | 3.18  | -0.07 | 1.13  |
| 0.19  | 0.30  | 0.48  | -0.40 | 0.80  | 1.24  | 1.03  |
| 0.83  | -0.44 | -0.11 | -0.48 | 0.85  | -0.21 | 3.24  |
| 0.10  | 1.08  | 2.04  | 1.24  | 1.60  | 0.87  | -0.74 |
| -1.11 | 0.11  | -0.40 | -0.14 | -1.03 | -0.38 | 0.95  |
| 1.49  | -0.92 | -0.67 | -0.21 | 0.40  | -0.66 | 3.43  |
| 1.17  | 0.84  | 0.44  | 1.64  | -0.30 | 1.07  | 0.30  |
| -1.06 | -0.22 | 0.55  | 0.07  | 0.38  | 0.71  | -0.31 |
| -0.15 | 2.33  | 1.65  | 0.61  | 2.13  | 1.22  | -0.92 |
| -0.54 | -1.18 | -0.31 | -0.66 | -0.97 | -0.22 | 1.14  |
| 5.16  | 0.05  | 0.48  | 0.02  | 0.22  | -0.03 | 0.89  |
| 1.76  | -0.34 | -0.27 | -0.33 | 0.25  | -0.29 | 0.22  |
| 1.31  | 1.06  | 0.59  | 1.84  | -0.21 | 1.32  | 0.41  |
| -0.52 | -0.47 | -0.43 | -0.08 | -0.53 | -0.26 | -0.56 |
| -0.46 | 0.15  | -0.63 | -0.68 | -0.09 | -0.63 | -0.47 |
| -0.25 | -0.43 | -0.21 | -0.27 | -0.05 | -0.31 | 0.14  |
| -0.89 | -0.67 | -0.37 | -0.35 | -0.12 | -0.67 | -0.56 |
| -0.53 | 0.09  | -0.33 | -0.59 | -0.36 | -0.16 | -0.25 |
| -1.23 | 0.19  | -0.09 | -0.10 | -0.61 | 0.04  | -1.22 |
| -1.13 | -0.32 | 0.13  | -0.35 | -0.05 | -0.26 | 0.02  |
| -1.27 | 1.37  | 0.08  | 0.35  | -1.26 | 0.86  | -1.51 |
| 6.22  | -0.61 | -0.63 | -0.67 | 0.24  | -0.64 | 5.00  |
| -0.59 | 1.03  | 0.86  | 0.11  | -0.71 | 0.13  | -0.71 |
| -1.45 | 2.03  | 1.79  | 0.40  | 0.69  | 1.11  | -1.58 |
| -0.13 | 0.38  | 0.80  | 0.25  | 0.29  | 0.74  | -0.02 |
| -1.03 | 0.11  | -0.39 | -0.10 | -0.27 | -0.43 | -0.55 |
| 12.72 | -0.30 | -0.07 | 0.05  | -0.27 | -0.27 | 0.71  |
| 1.40  | 0.29  | -0.10 | -0.38 | 1.48  | -0.39 | 1.87  |
| -1.61 | -1.04 | 0.01  | -1.45 | -1.20 | -1.21 | -0.79 |
| -0.41 | 0.08  | 0.32  | -0.22 | 0.19  | 0.29  | -0.28 |
| -1.72 | -0.60 | -0.82 | -0.57 | -1.06 | -0.28 | -1.49 |
| -0.27 | -0.05 | 0.26  | -0.43 | 2.31  | 0.20  | 1.71  |
| 2.29  | 0.03  | 1.07  | -0.17 | 0.79  | -0.66 | 0.03  |

|       |       |       |       |       |       |       |
|-------|-------|-------|-------|-------|-------|-------|
| 9.36  | -0.28 | -0.25 | -0.26 | -0.08 | -0.30 | 0.32  |
| -0.40 | 0.59  | 0.09  | 0.21  | -0.41 | 0.42  | -1.21 |
| 0.03  | 1.59  | 2.45  | -0.01 | 0.77  | 0.39  | 2.24  |
| -1.29 | -0.94 | 0.30  | 0.25  | 0.16  | 0.31  | -0.19 |
| -0.97 | 0.46  | -0.61 | -0.35 | -0.91 | 0.16  | -0.63 |
| -1.29 | 0.03  | -0.08 | -0.44 | -0.52 | -0.15 | -1.14 |
| -0.22 | 0.52  | 0.53  | -0.77 | 1.02  | -0.11 | 0.80  |
| 6.09  | -0.51 | -0.48 | -0.50 | -0.18 | -0.48 | -0.21 |
| 8.26  | -0.19 | -0.18 | -0.20 | -0.23 | -0.21 | -0.19 |
| -1.03 | -0.37 | -1.06 | -0.09 | -0.96 | -0.83 | -0.30 |
| 2.14  | -0.49 | -0.18 | -0.53 | 0.73  | -0.18 | 0.12  |
| 3.34  | 0.03  | 0.30  | -0.09 | 0.61  | -0.15 | -0.30 |
| 6.90  | -0.52 | -0.29 | -0.51 | 0.37  | -0.38 | 2.20  |
| 0.95  | 0.53  | 1.32  | 0.13  | 1.14  | 1.19  | 0.11  |
| -0.28 | -0.38 | -0.29 | -0.03 | -0.13 | -0.20 | -0.26 |
| -1.22 | 0.02  | -0.36 | -0.56 | -0.64 | -0.36 | -1.24 |
| -1.23 | -0.42 | -1.05 | -0.10 | -0.49 | -0.10 | -0.41 |
| 3.98  | -0.68 | -0.47 | -0.63 | 0.66  | -0.62 | 3.61  |
| 0.35  | -0.44 | -0.24 | -0.52 | 2.45  | 0.50  | 1.02  |
| 0.49  | 1.27  | 2.79  | 0.99  | 0.92  | 2.22  | 0.16  |
| -0.90 | -1.01 | -0.59 | -1.22 | -0.94 | -0.96 | 0.35  |
| -0.38 | 0.28  | 0.25  | -0.30 | 0.40  | -0.11 | -0.12 |
| -0.42 | -0.01 | -0.36 | -0.36 | -0.40 | 0.19  | -0.35 |
| -1.28 | -0.48 | -0.64 | -0.99 | -0.73 | -0.32 | -0.62 |
| -1.10 | -0.09 | -0.33 | -0.55 | -0.55 | -0.17 | -1.14 |
| 0.99  | 0.42  | 0.25  | 1.41  | -0.56 | 0.81  | -0.04 |
| -1.20 | 0.65  | 0.05  | -0.40 | -0.19 | 0.13  | -1.00 |
| -0.91 | -0.28 | -0.70 | -0.22 | -0.60 | -0.30 | -0.83 |
| 0.58  | -0.46 | -0.19 | -0.41 | -0.22 | -0.39 | -0.30 |
| 1.47  | 0.64  | 1.13  | 0.04  | 0.14  | 0.89  | 0.94  |
| -0.89 | 1.46  | 0.10  | -0.06 | -0.52 | 0.29  | -1.36 |
| -2.01 | -0.19 | -1.15 | -0.90 | -1.40 | -0.16 | -1.97 |
| 3.05  | 0.24  | 0.21  | -0.39 | 0.31  | 0.03  | 0.75  |
| 0.04  | 0.97  | 1.15  | 0.39  | 1.95  | 1.45  | 0.21  |
| -1.14 | -0.39 | -0.53 | -0.80 | -0.92 | 0.37  | 0.80  |
| -1.12 | 0.84  | 0.17  | -2.04 | 0.99  | 0.62  | 1.24  |
| 14.75 | -0.24 | -0.19 | -0.16 | -0.28 | -0.22 | -0.27 |
| 0.22  | 0.98  | 1.86  | 0.12  | 0.13  | 0.07  | -0.26 |
| 0.36  | 0.64  | 0.37  | 0.31  | 0.25  | 0.37  | -0.82 |
| 4.61  | 0.07  | -0.08 | -0.14 | 0.56  | -0.17 | -0.05 |
| 0.43  | 0.03  | 0.46  | -0.61 | 0.55  | 0.06  | 0.04  |
| -1.51 | 0.01  | -0.49 | -0.61 | 0.12  | -0.16 | -0.80 |
| -1.50 | 0.08  | -0.42 | 0.37  | -0.43 | -0.74 | -0.07 |
| -1.37 | 0.08  | -0.03 | -0.46 | -0.05 | 0.30  | -0.15 |
| 4.35  | -0.49 | -0.48 | -0.57 | 1.26  | -0.44 | 1.60  |
| -0.69 | 0.25  | -0.20 | -0.60 | -0.15 | 0.34  | -0.96 |
| -0.16 | 1.18  | 1.92  | 0.47  | 2.20  | 1.93  | -0.78 |
| -1.20 | -0.47 | -0.43 | -0.35 | -0.85 | -0.21 | -0.69 |

|       |       |       |       |       |       |       |
|-------|-------|-------|-------|-------|-------|-------|
| -0.23 | -0.41 | -0.08 | -0.54 | -0.41 | -0.37 | 0.83  |
| 2.20  | -0.19 | -0.47 | -0.20 | 0.87  | -0.39 | -0.85 |
| 4.13  | -0.32 | -0.38 | -0.54 | 1.17  | -0.52 | 1.63  |
| -1.23 | 1.05  | 0.01  | -0.29 | -0.60 | -0.05 | -1.40 |
| -0.52 | -0.10 | 0.06  | -0.08 | -0.09 | 0.30  | -0.44 |
| 4.15  | -0.29 | -0.09 | -0.18 | -0.16 | -0.08 | 0.58  |
| 3.74  | 0.37  | -0.19 | -0.43 | 0.38  | -0.29 | 2.34  |
| 1.60  | 0.58  | 0.91  | -0.67 | 1.77  | -0.08 | 0.99  |
| -1.34 | 0.75  | 1.08  | -0.26 | 0.42  | 1.32  | -0.62 |
| -1.15 | 1.63  | -0.04 | -0.46 | -0.10 | 0.54  | -1.14 |
| 3.00  | -0.56 | -0.42 | -0.41 | 0.45  | -0.29 | 0.77  |
| 0.24  | -0.08 | 0.88  | 0.78  | 0.01  | 0.82  | -0.94 |
| -1.35 | -1.14 | -0.52 | -0.22 | -0.82 | -0.66 | 0.39  |
| -0.14 | 1.18  | 0.13  | -0.27 | -0.47 | 1.35  | 5.62  |
| 0.28  | -0.06 | 0.29  | -0.51 | 0.13  | -0.16 | 0.02  |
| 0.28  | -0.06 | 0.29  | -0.51 | 0.13  | -0.16 | 0.02  |
| -0.98 | -0.23 | -0.57 | -0.55 | -0.59 | -0.39 | -0.93 |
| -0.75 | -0.07 | 0.02  | 0.32  | -0.67 | -0.28 | -0.98 |
| -1.40 | -0.30 | 0.43  | 0.01  | 0.19  | 0.93  | -1.32 |
| 1.01  | -0.64 | 0.39  | -0.75 | -0.15 | -0.67 | 1.10  |
| 0.06  | 0.29  | 0.26  | -0.17 | 2.06  | -0.16 | 2.43  |
| 6.10  | -0.18 | -0.22 | -0.22 | -0.16 | -0.20 | -0.25 |
| -1.18 | -0.69 | -0.66 | -0.46 | -0.73 | 0.01  | -0.56 |
| -0.89 | 0.70  | 0.61  | 0.55  | -0.80 | 0.26  | -0.45 |
| -0.87 | 0.89  | 0.82  | -0.16 | 0.14  | 0.16  | -1.22 |
| -0.90 | 0.16  | -0.23 | -0.50 | -0.55 | 0.30  | -0.68 |
| -0.63 | -0.60 | -0.26 | -0.18 | -0.16 | -0.10 | -0.12 |
| 1.67  | -0.32 | -0.29 | -0.25 | 0.25  | 0.81  | -0.35 |
| -0.68 | 1.31  | 1.18  | 0.60  | 0.40  | 0.73  | -1.23 |
| -0.56 | 2.97  | -0.11 | -0.55 | -0.79 | 1.12  | -0.32 |
| -0.74 | 0.77  | -0.12 | -0.32 | -0.09 | 0.58  | -0.87 |
| 3.22  | 0.05  | 0.87  | -0.14 | 0.31  | -0.15 | -0.22 |
| -1.15 | 0.29  | 0.51  | -0.55 | 0.42  | 0.01  | 0.57  |

| 14          | 15          | 16           | 17          | 18             | 19           | 20            |
|-------------|-------------|--------------|-------------|----------------|--------------|---------------|
| 85          | 86          | 87           | 88          | 89             | 90           | 91            |
| ACTCGGCGTGG | TATTGCACTCG | TTATAAAGCAAT | TCACAGTGGCT | CCTCTGGGCCCTTC | CTGGCCCTCTCT | TCGTACCGTGAGI |
| miR-1307-3p | miR-92b-3p  | miR-340-5p   | miR-27a-3p  | miR-326        | miR-328      | miR-126-3p    |
| 51847       | 51252       | 50588        | 49172       | 49098          | 48416        | 41318         |
| 0.64        | -1.14       | 2.86         | -0.47       | 2.24           | -0.41        | -0.88         |
| -1.76       | 3.28        | -0.51        | -1.07       | -1.55          | 0.21         | 0.03          |
| -0.83       | -0.34       | -0.44        | -0.11       | -0.84          | -1.05        | 0.30          |
| -0.60       | -0.71       | -0.46        | -0.59       | -0.78          | -1.30        | -0.25         |
| -1.62       | 1.07        | -0.31        | -0.27       | -0.87          | 1.15         | 0.27          |
| -0.56       | -0.12       | -0.19        | -0.61       | -0.98          | 0.60         | -0.83         |
| 0.99        | -0.56       | 0.32         | -0.80       | 0.64           | 1.82         | -0.81         |
| 0.81        | 1.68        | -0.46        | -0.87       | -0.03          | 2.04         | -0.77         |
| -0.82       | 1.27        | -0.48        | -0.62       | -0.96          | 0.12         | -0.53         |
| -0.93       | -0.11       | -0.18        | -0.49       | -1.05          | -1.15        | -0.30         |
| -0.37       | 0.42        | -0.46        | 0.90        | -0.63          | -0.32        | 0.61          |
| 0.50        | -0.11       | -0.44        | -1.03       | -0.57          | 0.75         | -0.72         |
| 0.10        | -0.93       | 3.85         | 2.19        | 0.84           | -1.36        | 2.36          |
| 1.12        | 0.52        | -0.44        | -1.02       | 0.29           | 0.66         | -0.75         |
| -0.55       | -0.42       | -0.28        | -0.14       | 0.14           | -1.10        | -0.18         |
| 0.50        | -0.58       | 0.11         | 0.90        | 0.33           | 0.56         | 1.49          |
| 0.57        | -0.47       | -0.06        | 0.38        | 2.07           | 0.21         | -0.87         |
| 1.25        | -1.01       | -0.35        | -0.21       | 1.42           | -0.40        | 1.63          |
| -0.43       | -0.77       | -0.33        | 0.50        | -0.39          | -0.55        | 0.09          |
| -0.16       | -0.78       | 0.27         | 2.05        | -0.03          | -1.30        | 2.28          |

|       |       |       |       |       |       |       |
|-------|-------|-------|-------|-------|-------|-------|
| 0.05  | 0.02  | -0.23 | -0.82 | -0.71 | 0.69  | -0.48 |
| 1.82  | -0.23 | -0.34 | -0.56 | 1.43  | 0.26  | -0.73 |
| 1.08  | 0.15  | -0.14 | -0.57 | 0.88  | 0.43  | -0.59 |
| 1.85  | 0.07  | -0.17 | -0.66 | 0.65  | 1.54  | -0.85 |
| -1.41 | 1.34  | -0.47 | 0.35  | -1.08 | 0.01  | -0.61 |
| -0.21 | -0.88 | -0.30 | 1.65  | -0.12 | -0.52 | -0.45 |
| -1.03 | -0.69 | -0.36 | 2.00  | -0.34 | -1.57 | 1.54  |
| -1.23 | -0.92 | 0.14  | 2.55  | -0.80 | -1.88 | 6.13  |
| -0.75 | 0.05  | 0.00  | 1.41  | -1.13 | -0.87 | 0.34  |
| -1.36 | 0.36  | -0.37 | 0.42  | -1.22 | -0.30 | -0.58 |
| -1.51 | 4.70  | -0.46 | -0.30 | -1.35 | 2.91  | -0.77 |
| -1.63 | 0.71  | -0.23 | 5.02  | -1.29 | -0.94 | 0.10  |
| -1.59 | 1.01  | -0.42 | 0.29  | -0.51 | -0.38 | 1.59  |
| 1.04  | -0.61 | -0.34 | -0.38 | 0.89  | 0.67  | -0.63 |
| 0.77  | -0.12 | 0.06  | -0.26 | 2.96  | 1.05  | -0.69 |
| 0.75  | -0.42 | -0.34 | -0.47 | 0.97  | -0.18 | -0.64 |
| -0.54 | 0.70  | -0.50 | -1.23 | -1.16 | 0.89  | -0.94 |
| -0.48 | -1.04 | 1.61  | -0.75 | 0.76  | -1.33 | -0.47 |
| -0.28 | -1.27 | 3.62  | 2.20  | 3.53  | -1.54 | 1.74  |
| 0.10  | -0.39 | -0.37 | -0.28 | 0.39  | -0.88 | -0.43 |
| 3.97  | -0.89 | -0.44 | 0.05  | 19.65 | 8.00  | -0.91 |
| 11.09 | -1.34 | -0.48 | 4.71  | 91.37 | 35.18 | -0.83 |
| 0.77  | -0.11 | -0.35 | -0.35 | 1.00  | 1.26  | -0.55 |
| 0.07  | -0.44 | 4.02  | 0.80  | 0.30  | -0.62 | -0.31 |
| -0.04 | -0.34 | -0.47 | -0.99 | -0.53 | 2.34  | -0.55 |
| 2.72  | -0.68 | -0.50 | -0.92 | 8.68  | 8.03  | -0.85 |
| -0.14 | -0.68 | -0.16 | 3.52  | 0.53  | -0.96 | 0.54  |
| 1.23  | -0.14 | 0.07  | -0.23 | 0.69  | 0.88  | -0.51 |
| 0.47  | -0.34 | -0.37 | -0.70 | 0.52  | 0.41  | 0.89  |
| 0.72  | -0.44 | -0.24 | -0.32 | 0.41  | -0.35 | -0.39 |
| 0.27  | -0.61 | -0.08 | -0.36 | 0.80  | -0.37 | 0.88  |
| 1.56  | 0.30  | -0.29 | 0.62  | 1.31  | 1.29  | -0.79 |
| 0.13  | 0.23  | -0.38 | -0.28 | 0.33  | 0.08  | -0.76 |
| 0.59  | -0.52 | 0.20  | 0.64  | 1.02  | 0.25  | -0.41 |
| 0.14  | 0.04  | -0.35 | -0.45 | -0.86 | 1.79  | -0.67 |
| -0.21 | 0.16  | -0.42 | 0.31  | -0.14 | -0.46 | -0.67 |
| -0.44 | -0.60 | -0.30 | -0.35 | -0.70 | -0.04 | -0.24 |
| -1.08 | -1.31 | 0.27  | 2.32  | -0.62 | -1.92 | 5.73  |
| -0.11 | -0.39 | -0.43 | -0.62 | -0.17 | 0.25  | -0.47 |
| -1.29 | 0.04  | 0.04  | 1.06  | -0.71 | 0.39  | 0.88  |
| -1.49 | -0.32 | -0.35 | 0.43  | -0.73 | 0.17  | 1.32  |
| -1.23 | -0.91 | -0.03 | 1.39  | -1.04 | -1.83 | 3.73  |
| -0.30 | -0.06 | -0.45 | -0.05 | -0.39 | -0.46 | -0.62 |
| -0.74 | -0.20 | -0.32 | -0.22 | -0.68 | -0.53 | -0.53 |
| -1.20 | -0.88 | -0.45 | 0.57  | -0.96 | -1.78 | 1.12  |
| 1.55  | -1.18 | -0.37 | -0.64 | -0.48 | -1.71 | 0.60  |
| -1.05 | -1.17 | 0.37  | 0.46  | -0.27 | -1.60 | 1.95  |
| -1.76 | 1.63  | -0.34 | 1.34  | -1.55 | -0.19 | -0.81 |
| -0.92 | 2.55  | -0.45 | -0.65 | -0.17 | 0.41  | 0.93  |
| -0.17 | 0.51  | -0.29 | 0.81  | 0.57  | 0.18  | 1.66  |
| -0.13 | -0.17 | -0.40 | -0.69 | -0.08 | -0.83 | -0.30 |
| -1.53 | -1.26 | -0.26 | -0.67 | -1.53 | -0.10 | 0.94  |
| -0.82 | -0.43 | -0.38 | -0.61 | -0.77 | -1.10 | 0.36  |
| 0.11  | -0.85 | -0.29 | -0.59 | 0.24  | -1.35 | 1.87  |
| 9.10  | -1.15 | -0.50 | -0.77 | 87.60 | 38.57 | -0.79 |
| -0.03 | -0.70 | 0.10  | -0.41 | -0.36 | -0.28 | 0.91  |
| -1.08 | -0.55 | -0.37 | 0.50  | -0.68 | -0.78 | -0.30 |
| -1.47 | 0.60  | -0.46 | -0.48 | -1.28 | 0.14  | -0.09 |
| 0.19  | -0.71 | -0.15 | 6.11  | 2.29  | -1.47 | 0.82  |

|       |       |       |       |       |       |       |
|-------|-------|-------|-------|-------|-------|-------|
| -0.47 | -0.64 | -0.24 | 3.61  | 0.20  | -1.28 | 1.13  |
| 0.26  | 0.23  | -0.43 | 1.01  | 0.26  | -0.02 | -0.63 |
| -0.13 | -0.44 | -0.35 | 1.84  | -0.20 | -0.68 | -0.13 |
| 1.59  | -0.26 | 0.22  | -0.68 | -0.01 | 2.12  | -0.58 |
| -0.49 | -1.14 | 1.57  | 2.04  | 1.08  | -1.55 | 2.69  |
| -1.20 | -0.91 | 0.58  | 1.47  | -0.89 | -2.01 | 3.05  |
| 0.65  | -0.28 | -0.46 | 0.64  | 1.46  | -0.19 | 0.24  |
| 0.05  | -0.70 | -0.19 | 1.13  | 0.10  | -1.15 | 0.21  |
| -0.40 | -0.22 | -0.41 | 0.04  | -0.06 | -0.90 | -0.39 |
| -0.19 | -0.60 | -0.22 | 0.14  | -0.52 | -1.40 | 0.31  |
| 0.13  | -0.30 | -0.39 | 0.89  | 0.29  | -0.16 | 0.03  |
| -1.00 | -0.83 | -0.30 | 0.94  | -1.36 | -1.97 | 0.75  |
| 0.00  | -0.25 | -0.28 | -0.38 | -1.01 | 0.08  | -0.84 |
| 0.86  | -0.39 | -0.02 | 0.34  | 0.84  | 0.52  | -0.76 |
| -0.81 | -0.65 | -0.44 | 2.05  | -0.83 | -1.03 | -0.20 |
| -0.55 | -0.74 | 0.80  | 0.45  | 0.86  | -1.21 | -0.18 |

|      |      |      |      |      |      |      |
|------|------|------|------|------|------|------|
| 1    | -1   | -2   | 1    | 1    | 0    | 3    |
| 0.00 | 0.00 | 0.00 | 0.00 | 0.00 | 0.00 | 0.00 |
| 1.00 | 1.00 | 1.00 | 1.00 | 1.00 | 1.00 | 1.00 |
| 0.69 | 0.49 | 0.31 | 0.68 | 0.93 | 0.74 | 0.59 |

| 82                      | 83                        | 84                           | 85            | 86      | 87      | 88         |
|-------------------------|---------------------------|------------------------------|---------------|---------|---------|------------|
| ACTCGGCGTGG(TATTGCACTCG | TTATAAAGCAAT(TTCACAGTGGCT | CCTCTGGGCCCTTC(CTGGCCCTCTCTC | TCGTACCGTGAGI |         |         |            |
| miR-1307-3p             | miR-92b-3p                | miR-340-5p                   | miR-27a-3p    | miR-326 | miR-328 | miR-126-3p |
| 51847                   | 51252                     | 50588                        | 49172         | 49098   | 48416   | 41318      |
| 0.64                    | -1.14                     | 2.86                         | -0.47         | 2.24    | -0.41   | -0.88      |
| -1.76                   | 3.28                      | -0.51                        | -1.07         | -1.55   | 0.21    | 0.03       |
| -0.83                   | -0.34                     | -0.44                        | -0.11         | -0.84   | -1.05   | 0.30       |
| -0.60                   | -0.71                     | -0.46                        | -0.59         | -0.78   | -1.30   | -0.25      |
| -1.62                   | 1.07                      | -0.31                        | -0.27         | -0.87   | 1.15    | 0.27       |
| -0.56                   | -0.12                     | -0.19                        | -0.61         | -0.98   | 0.60    | -0.83      |
| 0.99                    | -0.56                     | 0.32                         | -0.80         | 0.64    | 1.82    | -0.81      |
| 0.81                    | 1.68                      | -0.46                        | -0.87         | -0.03   | 2.04    | -0.77      |
| -0.82                   | 1.27                      | -0.48                        | -0.62         | -0.96   | 0.12    | -0.53      |
| -0.93                   | -0.11                     | -0.18                        | -0.49         | -1.05   | -1.15   | -0.30      |
| -0.37                   | 0.42                      | -0.46                        | 0.90          | -0.63   | -0.32   | 0.61       |
| 0.50                    | -0.11                     | -0.44                        | -1.03         | -0.57   | 0.75    | -0.72      |
| 0.10                    | -0.93                     | 3.85                         | 2.19          | 0.84    | -1.36   | 2.36       |
| 1.12                    | 0.52                      | -0.44                        | -1.02         | 0.29    | 0.66    | -0.75      |
| -0.55                   | -0.42                     | -0.28                        | -0.14         | 0.14    | -1.10   | -0.18      |
| 0.50                    | -0.58                     | 0.11                         | 0.90          | 0.33    | 0.56    | 1.49       |
| 0.57                    | -0.47                     | -0.06                        | 0.38          | 2.07    | 0.21    | -0.87      |
| 1.25                    | -1.01                     | -0.35                        | -0.21         | 1.42    | -0.40   | 1.63       |
| -0.43                   | -0.77                     | -0.33                        | 0.50          | -0.39   | -0.55   | 0.09       |
| -0.16                   | -0.78                     | 0.27                         | 2.05          | -0.03   | -1.30   | 2.28       |
| 0.05                    | 0.02                      | -0.23                        | -0.82         | -0.71   | 0.69    | -0.48      |
| 1.82                    | -0.23                     | -0.34                        | -0.56         | 1.43    | 0.26    | -0.73      |
| 1.08                    | 0.15                      | -0.14                        | -0.57         | 0.88    | 0.43    | -0.59      |
| 1.85                    | 0.07                      | -0.17                        | -0.66         | 0.65    | 1.54    | -0.85      |
| -1.41                   | 1.34                      | -0.47                        | 0.35          | -1.08   | 0.01    | -0.61      |
| -0.21                   | -0.88                     | -0.30                        | 1.65          | -0.12   | -0.52   | -0.45      |
| -1.03                   | -0.69                     | -0.36                        | 2.00          | -0.34   | -1.57   | 1.54       |
| -1.23                   | -0.92                     | 0.14                         | 2.55          | -0.80   | -1.88   | 6.13       |

|       |       |       |       |       |       |       |
|-------|-------|-------|-------|-------|-------|-------|
| -0.75 | 0.05  | 0.00  | 1.41  | -1.13 | -0.87 | 0.34  |
| -1.36 | 0.36  | -0.37 | 0.42  | -1.22 | -0.30 | -0.58 |
| -1.51 | 4.70  | -0.46 | -0.30 | -1.35 | 2.91  | -0.77 |
| -1.63 | 0.71  | -0.23 | 5.02  | -1.29 | -0.94 | 0.10  |
| -1.59 | 1.01  | -0.42 | 0.29  | -0.51 | -0.38 | 1.59  |
| 1.04  | -0.61 | -0.34 | -0.38 | 0.89  | 0.67  | -0.63 |
| 0.77  | -0.12 | 0.06  | -0.26 | 2.96  | 1.05  | -0.69 |
| 0.75  | -0.42 | -0.34 | -0.47 | 0.97  | -0.18 | -0.64 |
| -0.54 | 0.70  | -0.50 | -1.23 | -1.16 | 0.89  | -0.94 |
| -0.48 | -1.04 | 1.61  | -0.75 | 0.76  | -1.33 | -0.47 |
| -0.28 | -1.27 | 3.62  | 2.20  | 3.53  | -1.54 | 1.74  |
| 0.10  | -0.39 | -0.37 | -0.28 | 0.39  | -0.88 | -0.43 |
| 3.97  | -0.89 | -0.44 | 0.05  | 19.65 | 8.00  | -0.91 |
| 11.09 | -1.34 | -0.48 | 4.71  | 91.37 | 35.18 | -0.83 |
| 0.77  | -0.11 | -0.35 | -0.35 | 1.00  | 1.26  | -0.55 |
| 0.07  | -0.44 | 4.02  | 0.80  | 0.30  | -0.62 | -0.31 |
| -0.04 | -0.34 | -0.47 | -0.99 | -0.53 | 2.34  | -0.55 |
| 2.72  | -0.68 | -0.50 | -0.92 | 8.68  | 8.03  | -0.85 |
| -0.14 | -0.68 | -0.16 | 3.52  | 0.53  | -0.96 | 0.54  |
| 1.23  | -0.14 | 0.07  | -0.23 | 0.69  | 0.88  | -0.51 |
| 0.47  | -0.34 | -0.37 | -0.70 | 0.52  | 0.41  | 0.89  |
| 0.72  | -0.44 | -0.24 | -0.32 | 0.41  | -0.35 | -0.39 |
| 0.27  | -0.61 | -0.08 | -0.36 | 0.80  | -0.37 | 0.88  |
| 1.56  | 0.30  | -0.29 | 0.62  | 1.31  | 1.29  | -0.79 |
| 0.13  | 0.23  | -0.38 | -0.28 | 0.33  | 0.08  | -0.76 |
| 0.59  | -0.52 | 0.20  | 0.64  | 1.02  | 0.25  | -0.41 |
| 0.14  | 0.04  | -0.35 | -0.45 | -0.86 | 1.79  | -0.67 |
| -0.21 | 0.16  | -0.42 | 0.31  | -0.14 | -0.46 | -0.67 |
| -0.44 | -0.60 | -0.30 | -0.35 | -0.70 | -0.04 | -0.24 |
| -1.08 | -1.31 | 0.27  | 2.32  | -0.62 | -1.92 | 5.73  |
| -0.11 | -0.39 | -0.43 | -0.62 | -0.17 | 0.25  | -0.47 |
| -1.29 | 0.04  | 0.04  | 1.06  | -0.71 | 0.39  | 0.88  |
| -1.49 | -0.32 | -0.35 | 0.43  | -0.73 | 0.17  | 1.32  |
| -1.23 | -0.91 | -0.03 | 1.39  | -1.04 | -1.83 | 3.73  |
| -0.30 | -0.06 | -0.45 | -0.05 | -0.39 | -0.46 | -0.62 |
| -0.74 | -0.20 | -0.32 | -0.22 | -0.68 | -0.53 | -0.53 |
| -1.20 | -0.88 | -0.45 | 0.57  | -0.96 | -1.78 | 1.12  |
| 1.55  | -1.18 | -0.37 | -0.64 | -0.48 | -1.71 | 0.60  |
| -1.05 | -1.17 | 0.37  | 0.46  | -0.27 | -1.60 | 1.95  |
| -1.76 | 1.63  | -0.34 | 1.34  | -1.55 | -0.19 | -0.81 |
| -0.92 | 2.55  | -0.45 | -0.65 | -0.17 | 0.41  | 0.93  |
| -0.17 | 0.51  | -0.29 | 0.81  | 0.57  | 0.18  | 1.66  |
| -0.13 | -0.17 | -0.40 | -0.69 | -0.08 | -0.83 | -0.30 |
| -1.53 | -1.26 | -0.26 | -0.67 | -1.53 | -0.10 | 0.94  |
| -0.82 | -0.43 | -0.38 | -0.61 | -0.77 | -1.10 | 0.36  |
| 0.11  | -0.85 | -0.29 | -0.59 | 0.24  | -1.35 | 1.87  |
| 9.10  | -1.15 | -0.50 | -0.77 | 87.60 | 38.57 | -0.79 |
| -0.03 | -0.70 | 0.10  | -0.41 | -0.36 | -0.28 | 0.91  |
| -1.08 | -0.55 | -0.37 | 0.50  | -0.68 | -0.78 | -0.30 |
| -1.47 | 0.60  | -0.46 | -0.48 | -1.28 | 0.14  | -0.09 |
| 0.19  | -0.71 | -0.15 | 6.11  | 2.29  | -1.47 | 0.82  |
| -0.47 | -0.64 | -0.24 | 3.61  | 0.20  | -1.28 | 1.13  |
| 0.26  | 0.23  | -0.43 | 1.01  | 0.26  | -0.02 | -0.63 |
| -0.13 | -0.44 | -0.35 | 1.84  | -0.20 | -0.68 | -0.13 |
| 1.59  | -0.26 | 0.22  | -0.68 | -0.01 | 2.12  | -0.58 |
| -0.49 | -1.14 | 1.57  | 2.04  | 1.08  | -1.55 | 2.69  |
| -1.20 | -0.91 | 0.58  | 1.47  | -0.89 | -2.01 | 3.05  |
| 0.65  | -0.28 | -0.46 | 0.64  | 1.46  | -0.19 | 0.24  |
| 0.05  | -0.70 | -0.19 | 1.13  | 0.10  | -1.15 | 0.21  |

|       |       |       |       |       |       |       |
|-------|-------|-------|-------|-------|-------|-------|
| -0.40 | -0.22 | -0.41 | 0.04  | -0.06 | -0.90 | -0.39 |
| -0.19 | -0.60 | -0.22 | 0.14  | -0.52 | -1.40 | 0.31  |
| 0.13  | -0.30 | -0.39 | 0.89  | 0.29  | -0.16 | 0.03  |
| -1.00 | -0.83 | -0.30 | 0.94  | -1.36 | -1.97 | 0.75  |
| 0.00  | -0.25 | -0.28 | -0.38 | -1.01 | 0.08  | -0.84 |
| 0.86  | -0.39 | -0.02 | 0.34  | 0.84  | 0.52  | -0.76 |
| -0.81 | -0.65 | -0.44 | 2.05  | -0.83 | -1.03 | -0.20 |
| -1    | -1    | 1     | 0     | 1     | -1    | 0     |

---

| 82          | 83          | 84           | 85           | 86             | 87            | 88           |
|-------------|-------------|--------------|--------------|----------------|---------------|--------------|
| 51          | 110         | 84           | 109          | 98             | 81            | 40           |
| TCGGATCCGTC | TGGAGAGAAAG | TTATAAAGCAAT | TAAAGTGCTGAC | CCGCACTGTGGGTA | AATTGCACGGTAT | TGAGGGGCAGAG |
| miR-127-3p  | miR-185-5p  | miR-340-5p   | miR-106b-5p  | miR-106b-3p    | miR-363-3p    | miR-423-5p   |
| 154285      | 23397       | 50588        | 23446        | 27350          | 52323         | 312449       |
| 2.23        | -0.68       | 2.86         | -0.42        | 0.24           | -0.38         | -0.27        |
| 0.39        | -0.74       | -0.51        | -0.19        | 0.97           | 0.32          | -0.54        |
| -0.65       | 0.66        | -0.44        | 0.84         | -1.08          | 2.78          | -0.18        |
| -1.12       | -0.60       | -0.46        | -0.19        | -0.77          | 1.35          | -0.22        |
| 0.66        | -0.24       | -0.31        | 0.96         | -1.91          | 0.79          | -0.64        |
| -0.15       | -0.93       | -0.19        | -0.28        | -0.53          | -0.86         | -0.26        |
| 0.71        | -0.93       | 0.32         | -0.51        | 0.01           | -1.21         | -0.17        |
| -0.53       | -0.97       | -0.46        | -0.82        | 2.00           | -0.90         | 1.03         |
| 0.44        | -0.65       | -0.48        | -0.86        | -1.08          | 1.71          | -0.42        |
| -0.33       | 0.96        | -0.18        | 0.15         | -1.09          | -0.28         | -0.65        |
| -0.49       | -0.13       | -0.46        | -0.49        | -1.32          | 0.74          | -0.42        |
| -1.56       | -1.13       | -0.44        | -0.95        | -0.10          | -1.29         | 4.21         |
| -1.76       | 1.87        | 3.85         | 3.79         | -0.40          | 0.27          | -0.53        |
| 0.41        | -0.87       | -0.44        | -0.92        | 0.69           | -0.96         | 0.39         |
| -0.25       | 1.16        | -0.28        | -0.15        | -0.11          | 0.26          | -0.57        |
| -0.04       | 0.41        | 0.11         | 0.77         | -0.05          | 0.68          | -0.58        |
| 0.63        | -0.46       | -0.06        | -0.31        | 0.29           | 0.36          | -0.39        |
| 0.68        | 0.98        | -0.35        | 1.00         | 1.93           | 0.82          | -0.10        |
| -0.40       | -0.20       | -0.33        | -0.55        | 0.37           | -1.07         | -0.19        |
| -1.63       | 2.88        | 0.27         | 1.44         | -0.49          | 0.90          | -0.22        |
| -0.96       | -0.77       | -0.23        | -0.48        | -0.20          | -0.60         | -0.63        |
| 1.06        | -0.29       | -0.34        | -0.83        | 1.40           | -0.83         | 1.82         |
| -0.36       | -0.18       | -0.14        | -0.46        | 1.59           | -0.34         | 0.09         |
| -0.75       | -0.49       | -0.17        | -0.36        | 0.76           | -0.98         | -0.07        |
| 1.78        | -0.52       | -0.47        | -0.51        | 0.34           | -0.84         | 0.25         |
| 1.21        | 0.38        | -0.30        | -0.22        | -0.61          | -0.50         | -0.17        |
| 0.79        | 1.47        | -0.36        | 0.55         | -0.86          | 0.09          | -0.58        |
| -1.16       | 2.23        | 0.14         | 4.67         | -1.86          | 2.43          | -0.52        |
| 1.59        | -0.60       | 0.00         | -0.15        | -0.77          | -0.36         | -0.44        |
| -0.32       | -0.63       | -0.37        | -0.65        | -0.45          | -0.79         | -0.72        |
| 7.26        | -1.01       | -0.46        | -0.82        | 0.81           | -0.67         | -0.65        |
| 3.08        | -0.01       | -0.23        | -0.27        | -0.19          | -0.27         | -0.45        |
| -0.27       | 1.24        | -0.42        | 1.79         | -1.30          | 4.17          | -0.56        |
| -0.77       | -0.80       | -0.34        | -0.29        | 0.66           | -0.84         | -0.09        |
| -0.37       | -0.40       | 0.06         | 0.13         | 1.08           | -0.40         | -0.55        |
| -1.47       | -0.87       | -0.34        | -0.65        | -0.82          | -0.52         | 0.14         |
| -1.35       | -1.24       | -0.50        | -1.04        | -0.27          | -1.15         | 3.28         |
| 0.17        | -0.51       | 1.61         | -0.29        | 0.10           | -1.35         | -0.70        |
| -0.77       | 0.38        | 3.62         | 1.91         | -1.17          | -0.10         | -0.71        |

|       |       |       |       |       |       |       |
|-------|-------|-------|-------|-------|-------|-------|
| -1.14 | -0.65 | -0.37 | -0.65 | -0.09 | 0.33  | 0.17  |
| 2.27  | 4.78  | -0.44 | 0.26  | 4.93  | -1.18 | 2.65  |
| 6.64  | 5.90  | -0.48 | -0.15 | 16.43 | -0.05 | 3.67  |
| 1.22  | -0.82 | -0.35 | -0.73 | 0.50  | -0.55 | -0.59 |
| -0.99 | 2.47  | 4.02  | 1.60  | 0.85  | -0.62 | -0.70 |
| -0.93 | -0.98 | -0.47 | -1.05 | 2.29  | -1.57 | 1.17  |
| 0.39  | 2.35  | -0.50 | -0.32 | 3.86  | -1.57 | 3.29  |
| 0.07  | -0.25 | -0.16 | 0.19  | -0.56 | 1.61  | -0.30 |
| 0.95  | -0.17 | 0.07  | -0.37 | 2.49  | -0.53 | -0.18 |
| -1.45 | 0.15  | -0.37 | 0.20  | 0.70  | 0.10  | -0.54 |
| 0.43  | -0.34 | -0.24 | -0.26 | 0.02  | 0.30  | -0.29 |
| 1.90  | 0.51  | -0.08 | 0.42  | -0.41 | 0.43  | -0.57 |
| 10.02 | -0.71 | -0.29 | -0.47 | -0.16 | -0.98 | -0.40 |
| 5.09  | -0.61 | -0.38 | -0.30 | -0.24 | -0.84 | -0.45 |
| -0.16 | 0.60  | 0.20  | 0.50  | -0.11 | -0.12 | -0.49 |
| -0.85 | -1.04 | -0.35 | -0.71 | 0.60  | -0.88 | 0.61  |
| 3.87  | -0.75 | -0.42 | -0.62 | -0.44 | -0.37 | -0.37 |
| 4.53  | -0.45 | -0.30 | -0.07 | -0.39 | 0.15  | -0.63 |
| -1.76 | 8.04  | 0.27  | 4.61  | -1.70 | 0.44  | -0.35 |
| 0.82  | 0.14  | -0.43 | -0.76 | 0.32  | -0.96 | 0.40  |
| -1.17 | 0.90  | 0.04  | 0.93  | 0.94  | 0.37  | -0.33 |
| -0.98 | 1.51  | -0.35 | 1.08  | -0.87 | 0.46  | -0.45 |
| -1.71 | 6.51  | -0.03 | 3.12  | -1.50 | 1.17  | -0.30 |
| -1.35 | -0.52 | -0.45 | -0.66 | 0.17  | -0.59 | 0.62  |
| -0.22 | 0.28  | -0.32 | -0.30 | -0.26 | -0.59 | 0.45  |
| -1.58 | 1.56  | -0.45 | 0.11  | -1.46 | 0.92  | -0.16 |
| -1.59 | 0.65  | -0.37 | -0.55 | 3.41  | -0.61 | 0.66  |
| -0.31 | 0.23  | 0.37  | 0.85  | -1.66 | 1.21  | -0.63 |
| -0.99 | -1.34 | -0.34 | -1.19 | 2.48  | -1.21 | -0.69 |
| 0.71  | -0.07 | -0.45 | 0.83  | 1.23  | 3.19  | 0.67  |
| 1.52  | 0.40  | -0.29 | 1.04  | 1.63  | 4.29  | -0.22 |
| 0.29  | -0.47 | -0.40 | -0.34 | 0.27  | -0.47 | -0.21 |
| -1.85 | -0.56 | -0.26 | 0.51  | 2.19  | -1.73 | -0.28 |
| -1.24 | -0.18 | -0.38 | -0.18 | -0.61 | 1.62  | -0.39 |
| -0.67 | 1.75  | -0.29 | 0.78  | -0.20 | -0.35 | -0.39 |
| 4.92  | -0.36 | -0.50 | -1.13 | 12.40 | -1.18 | 6.68  |
| 0.71  | 0.96  | 0.10  | 0.69  | -0.34 | 0.22  | -0.40 |
| -0.24 | -0.52 | -0.37 | -0.75 | -0.07 | -1.14 | -0.62 |
| 1.99  | -0.77 | -0.46 | -1.03 | 2.09  | -1.67 | 1.22  |
| 0.65  | 1.69  | -0.15 | 1.65  | -1.25 | 3.01  | -0.68 |
| -0.66 | -0.17 | -0.24 | 0.01  | -1.32 | 1.12  | -0.54 |
| -1.53 | -0.45 | -0.43 | -0.62 | -0.41 | 1.18  | -0.47 |
| 1.90  | -0.35 | -0.35 | -0.34 | -0.97 | 1.02  | -0.49 |
| -0.23 | -0.61 | 0.22  | -0.15 | 1.84  | -0.72 | 0.11  |
| -0.97 | 3.05  | 1.57  | 2.73  | -0.83 | 0.55  | -0.55 |
| -1.61 | 3.74  | 0.58  | 4.15  | -1.50 | 0.99  | -0.53 |
| -1.04 | 0.37  | -0.46 | -0.29 | 0.08  | 0.42  | 0.09  |
| 0.01  | -0.19 | -0.19 | -0.09 | -0.42 | 0.25  | -0.33 |
| -1.45 | -0.43 | -0.41 | -0.18 | 0.37  | 1.41  | -0.59 |
| -1.20 | 0.38  | -0.22 | -0.16 | -0.43 | -0.56 | -0.36 |
| -1.21 | -0.29 | -0.39 | -0.08 | -0.74 | 0.81  | -0.16 |
| -0.79 | 2.34  | -0.30 | 0.58  | -0.07 | -0.04 | -0.25 |
| 0.19  | -1.03 | -0.28 | -0.83 | 0.39  | -1.21 | -0.68 |
| 0.80  | -0.62 | -0.02 | -0.20 | 0.59  | -0.01 | 0.45  |
| -0.76 | 0.70  | -0.44 | -0.56 | -0.98 | -0.68 | -0.64 |
| 1.12  | 0.92  | 0.80  | -0.49 | -0.73 | -0.27 | -0.59 |
| 0.41  | 0.41  | 0.41  | 0.41  | 0.42  | 0.44  | 0.46  |
| 0.36  | 0.34  | 1.00  | 1.00  | 0.24  | 0.36  | 0.71  |













































































































































































|         |         |         |         |         |         |         |
|---------|---------|---------|---------|---------|---------|---------|
| 1160935 | 2099567 | 1323600 | 3571995 | 3076499 | 1136044 | 2580829 |
| 92      | 93      | 94      | 95      | 96      | 97      | 98      |
| 23      | 24      | 25      | 26      | 27      | 28      | 29      |
| E_7     | E_8     | E_9     | F_40    | F_41    | F_42    | F_44    |
| CHR_P   | CHR_P   | CHR_P   | CHR_P   | CHR_P   | CHR_P   | CHR_P   |
| 2333798 | 3006460 | 1323600 | 5508732 | 5304434 | 4176164 | 4502548 |
| 0.52    | 0.30    | 0.35    | 0.93    | 0.46    | 0.25    | 0.40    |
| E_7     | E_8     | E_9     | F_40    | F_41    | F_42    | F_44    |
| 1172863 | 906893  | 0       | 1936737 | 2227935 | 3040120 | 1921719 |
| 430892  | 567895  | 487095  | 1116571 | 1013554 | 241383  | 1338069 |
| 93617   | 196075  | 92860   | 372466  | 369204  | 95275   | 219682  |
| 148736  | 270305  | 150760  | 144769  | 367770  | 14583   | 145667  |
| 30353   | 113550  | 79014   | 173851  | 170780  | 142685  | 146527  |
| 82596   | 155876  | 85452   | 187609  | 167992  | 65057   | 146024  |
| 38241   | 80210   | 45678   | 265139  | 98721   | 59034   | 23965   |
| 69449   | 163721  | 80719   | 154960  | 157746  | 44478   | 54262   |
| 15818   | 9548    | 3869    | 67671   | 13031   | 23608   | 2532    |
| 24670   | 55580   | 23927   | 105923  | 72153   | 21383   | 18985   |
| 17073   | 30178   | 26587   | 104997  | 54674   | 42363   | 66948   |
| 6552    | 22873   | 20929   | 47605   | 26249   | 28124   | 51409   |
| 20378   | 39596   | 18875   | 47949   | 43533   | 16743   | 22650   |
| 4948    | 31680   | 16258   | 45264   | 32383   | 56843   | 26369   |
| 9117    | 18724   | 14550   | 23025   | 27635   | 12557   | 18005   |
| 2835    | 13374   | 4201    | 59787   | 11354   | 52887   | 7585    |
| 10259   | 19506   | 12243   | 13077   | 24806   | 7630    | 13509   |
| 3697    | 21576   | 5753    | 49007   | 14030   | 13898   | 8712    |
| 7747    | 16607   | 7422    | 42871   | 22011   | 11271   | 15137   |
| 8106    | 13417   | 6278    | 35265   | 18210   | 6886    | 7645    |
| 7861    | 13955   | 6599    | 35791   | 18606   | 4800    | 19478   |
| 5428    | 11601   | 4615    | 30985   | 15512   | 7157    | 15258   |
| 3104    | 8290    | 5474    | 15659   | 11635   | 6148    | 10258   |
| 2483    | 9850    | 5079    | 41393   | 10738   | 7328    | 36115   |
| 5398    | 11011   | 3173    | 22523   | 23870   | 7963    | 2938    |
| 1975    | 7215    | 2028    | 30065   | 8975    | 23658   | 2871    |
| 6156    | 14455   | 7456    | 21998   | 15343   | 2634    | 13895   |
| 5195    | 7325    | 5344    | 8119    | 10887   | 6897    | 7480    |
| 602     | 2808    | 3748    | 16981   | 4214    | 16425   | 2518    |
| 5374    | 8404    | 7902    | 10130   | 15437   | 4288    | 4053    |
| 3316    | 8131    | 4344    | 13042   | 12622   | 3104    | 13764   |
| 6800    | 10459   | 4813    | 20057   | 13608   | 1778    | 4276    |
| 2173    | 6876    | 3633    | 7891    | 10504   | 6304    | 3427    |
| 2238    | 5921    | 2503    | 8198    | 5449    | 4144    | 2360    |
| 400     | 1536    | 507     | 13168   | 1871    | 3973    | 1637    |
| 5072    | 7830    | 7291    | 9354    | 14606   | 3939    | 3737    |
| 2375    | 4735    | 5382    | 6126    | 9559    | 1804    | 3723    |
| 4499    | 3898    | 2305    | 11683   | 5682    | 2563    | 3703    |
| 1807    | 4669    | 2725    | 9688    | 5919    | 3708    | 2694    |
| 1572    | 4467    | 2886    | 9818    | 4133    | 1843    | 6980    |
| 3962    | 3780    | 1108    | 6009    | 7634    | 2383    | 1265    |
| 3040    | 4636    | 2942    | 5063    | 7426    | 563     | 3486    |
| 2074    | 4725    | 2355    | 7359    | 5694    | 2415    | 5368    |
| 3507    | 4286    | 3015    | 3652    | 8135    | 945     | 3096    |
| 462     | 795     | 435     | 5207    | 1104    | 8344    | 842     |
| 3969    | 6665    | 2790    | 3222    | 6505    | 1015    | 1233    |

|      |      |      |       |      |      |      |
|------|------|------|-------|------|------|------|
| 2660 | 4605 | 2146 | 6160  | 5870 | 861  | 3552 |
| 1795 | 3923 | 1942 | 5275  | 5637 | 1408 | 2688 |
| 1890 | 2452 | 1926 | 4581  | 3481 | 1159 | 4563 |
| 101  | 608  | 528  | 411   | 357  | 1106 | 262  |
| 1531 | 1660 | 560  | 10454 | 1263 | 3912 | 1640 |
| 577  | 2301 | 353  | 1459  | 1227 | 726  | 3186 |
| 1324 | 2938 | 1110 | 4484  | 4212 | 869  | 1227 |
| 997  | 1626 | 1168 | 2419  | 3051 | 573  | 1808 |
| 1007 | 2207 | 865  | 8034  | 3130 | 2145 | 3430 |
| 910  | 2869 | 901  | 4326  | 1250 | 894  | 1362 |
| 90   | 206  | 122  | 813   | 188  | 596  | 210  |
| 1265 | 1894 | 1268 | 2534  | 3161 | 456  | 751  |
| 1543 | 3472 | 985  | 3668  | 2730 | 1781 | 1108 |
| 641  | 2239 | 1399 | 3604  | 3307 | 980  | 2932 |
| 2086 | 1142 | 1136 | 695   | 4455 | 592  | 1721 |
| 892  | 1525 | 788  | 1996  | 2164 | 364  | 1111 |
| 1013 | 1840 | 524  | 3786  | 1964 | 1108 | 916  |
| 99   | 206  | 119  | 777   | 301  | 231  | 153  |
| 87   | 159  | 86   | 157   | 188  | 82   | 87   |
| 820  | 711  | 1147 | 1402  | 1428 | 847  | 2376 |
| 410  | 948  | 453  | 2657  | 1395 | 620  | 492  |
| 445  | 1045 | 449  | 2256  | 962  | 279  | 347  |
| 183  | 487  | 218  | 1561  | 626  | 1137 | 266  |
| 623  | 1575 | 572  | 2504  | 2208 | 480  | 563  |
| 125  | 676  | 1280 | 2557  | 1669 | 449  | 1158 |
| 780  | 1069 | 561  | 1379  | 1561 | 138  | 1184 |
| 576  | 636  | 801  | 1705  | 1845 | 568  | 1493 |
| 100  | 330  | 140  | 1884  | 326  | 1700 | 285  |
| 376  | 782  | 409  | 3583  | 1678 | 754  | 1266 |
| 760  | 2173 | 786  | 2036  | 2754 | 430  | 724  |
| 177  | 654  | 101  | 642   | 530  | 748  | 1106 |
| 601  | 1074 | 495  | 1963  | 1290 | 471  | 804  |
| 750  | 499  | 320  | 672   | 2716 | 279  | 724  |
| 441  | 690  | 278  | 1062  | 1337 | 379  | 540  |
| 494  | 727  | 366  | 980   | 1232 | 90   | 568  |
| 470  | 797  | 751  | 900   | 1439 | 377  | 399  |
| 601  | 820  | 391  | 1207  | 1255 | 185  | 1007 |
| 481  | 584  | 586  | 1104  | 1268 | 265  | 1139 |
| 37   | 445  | 91   | 692   | 243  | 161  | 400  |
| 418  | 946  | 336  | 962   | 1254 | 472  | 466  |
| 608  | 604  | 349  | 641   | 988  | 39   | 253  |
| 436  | 482  | 357  | 679   | 1179 | 115  | 1113 |
| 270  | 480  | 154  | 882   | 601  | 373  | 84   |
| 430  | 823  | 406  | 1734  | 1317 | 320  | 626  |
| 311  | 493  | 223  | 491   | 1415 | 640  | 403  |
| 400  | 556  | 0    | 1298  | 985  | 445  | 1575 |
| 14   | 42   | 35   | 23    | 50   | 8    | 15   |
| 369  | 883  | 293  | 784   | 656  | 198  | 442  |
| 319  | 492  | 301  | 769   | 719  | 59   | 168  |
| 144  | 209  | 122  | 729   | 266  | 118  | 77   |
| 220  | 539  | 120  | 964   | 600  | 216  | 136  |
| 284  | 379  | 220  | 924   | 686  | 159  | 866  |
| 255  | 377  | 326  | 639   | 474  | 235  | 653  |
| 274  | 467  | 223  | 784   | 816  | 235  | 639  |
| 51   | 94   | 43   | 997   | 155  | 367  | 68   |
| 261  | 303  | 99   | 547   | 740  | 11   | 279  |
| 283  | 631  | 254  | 1150  | 929  | 107  | 324  |
| 191  | 358  | 245  | 392   | 625  | 151  | 368  |
| 124  | 481  | 76   | 384   | 375  | 640  | 184  |

|     |     |     |      |     |     |     |
|-----|-----|-----|------|-----|-----|-----|
| 144 | 207 | 166 | 798  | 328 | 71  | 198 |
| 82  | 134 | 63  | 821  | 151 | 316 | 129 |
| 318 | 354 | 184 | 377  | 500 | 27  | 429 |
| 212 | 458 | 253 | 663  | 825 | 127 | 289 |
| 102 | 225 | 132 | 358  | 334 | 195 | 95  |
| 161 | 197 | 99  | 501  | 265 | 339 | 67  |
| 210 | 442 | 97  | 1018 | 383 | 246 | 214 |
| 221 | 443 | 173 | 610  | 697 | 121 | 432 |
| 324 | 260 | 113 | 422  | 546 | 23  | 230 |
| 68  | 146 | 94  | 485  | 245 | 182 | 102 |
| 134 | 410 | 250 | 439  | 587 | 50  | 136 |
| 78  | 235 | 178 | 322  | 315 | 200 | 164 |
| 180 | 220 | 114 | 270  | 504 | 418 | 156 |
| 109 | 251 | 82  | 386  | 268 | 113 | 148 |
| 109 | 251 | 82  | 386  | 268 | 113 | 148 |
| 126 | 148 | 98  | 245  | 281 | 35  | 79  |
| 120 | 235 | 184 | 186  | 266 | 29  | 87  |
| 103 | 264 | 140 | 405  | 465 | 42  | 394 |
| 32  | 241 | 24  | 248  | 77  | 199 | 101 |
| 120 | 213 | 96  | 806  | 222 | 284 | 168 |
| 21  | 31  | 19  | 70   | 51  | 14  | 18  |
| 81  | 151 | 115 | 238  | 369 | 89  | 202 |
| 151 | 261 | 162 | 132  | 317 | 66  | 106 |
| 167 | 294 | 109 | 354  | 309 | 20  | 207 |
| 134 | 171 | 77  | 190  | 393 | 47  | 197 |
| 34  | 159 | 115 | 319  | 298 | 107 | 286 |
| 37  | 72  | 50  | 266  | 357 | 34  | 111 |
| 139 | 241 | 123 | 299  | 299 | 22  | 162 |
| 228 | 130 | 57  | 116  | 357 | 60  | 44  |
| 170 | 162 | 82  | 285  | 406 | 21  | 130 |
| 57  | 195 | 52  | 224  | 118 | 39  | 66  |
| 94  | 187 | 69  | 306  | 220 | 103 | 189 |
| 47  | 184 | 38  | 211  | 193 | 263 | 63  |
| 84  | 134 | 109 | 218  | 127 | 61  | 74  |
| 102 | 212 | 111 | 144  | 235 | 152 | 48  |
| 109 | 167 | 94  | 131  | 306 | 22  | 70  |
| 77  | 167 | 90  | 161  | 131 | 85  | 90  |
| 131 | 159 | 107 | 213  | 387 | 39  | 107 |
| 77  | 118 | 38  | 112  | 143 | 18  | 35  |
| 78  | 183 | 100 | 111  | 266 | 93  | 75  |
| 4   | 15  | 6   | 37   | 48  | 38  | 10  |
| 49  | 88  | 123 | 112  | 120 | 30  | 109 |
| 50  | 141 | 87  | 210  | 225 | 55  | 152 |
| 80  | 165 | 70  | 351  | 262 | 33  | 59  |
| 63  | 68  | 89  | 130  | 241 | 40  | 116 |
| 108 | 118 | 67  | 109  | 182 | 11  | 74  |
| 36  | 109 | 15  | 362  | 150 | 117 | 91  |
| 29  | 64  | 42  | 151  | 133 | 58  | 17  |
| 26  | 89  | 7   | 141  | 27  | 107 | 47  |
| 101 | 123 | 68  | 186  | 248 | 60  | 114 |
| 69  | 121 | 25  | 49   | 93  | 27  | 7   |
| 38  | 57  | 76  | 78   | 174 | 18  | 126 |
| 35  | 77  | 15  | 171  | 139 | 62  | 54  |
| 80  | 68  | 32  | 44   | 189 | 4   | 35  |
| 87  | 100 | 52  | 120  | 163 | 22  | 67  |
| 55  | 77  | 29  | 123  | 106 | 35  | 49  |
| 4   | 10  | 3   | 38   | 13  | 13  | 10  |
| 33  | 90  | 45  | 143  | 181 | 16  | 80  |
| 53  | 91  | 45  | 110  | 150 | 19  | 76  |

|     |     |    |     |     |     |     |
|-----|-----|----|-----|-----|-----|-----|
| 30  | 84  | 24 | 278 | 102 | 42  | 62  |
| 48  | 113 | 35 | 290 | 207 | 35  | 72  |
| 48  | 77  | 73 | 78  | 100 | 27  | 74  |
| 62  | 128 | 59 | 149 | 192 | 21  | 88  |
| 37  | 50  | 13 | 37  | 52  | 8   | 34  |
| 28  | 60  | 16 | 89  | 45  | 24  | 8   |
| 52  | 52  | 78 | 77  | 74  | 60  | 61  |
| 36  | 119 | 39 | 79  | 248 | 44  | 22  |
| 13  | 63  | 42 | 122 | 51  | 64  | 75  |
| 44  | 104 | 54 | 164 | 122 | 26  | 146 |
| 60  | 120 | 31 | 164 | 151 | 16  | 75  |
| 48  | 85  | 30 | 319 | 103 | 47  | 44  |
| 56  | 98  | 43 | 76  | 78  | 8   | 60  |
| 12  | 49  | 18 | 14  | 25  | 22  | 83  |
| 38  | 84  | 20 | 259 | 106 | 49  | 67  |
| 70  | 81  | 24 | 127 | 90  | 10  | 52  |
| 21  | 50  | 16 | 29  | 40  | 10  | 43  |
| 5   | 67  | 0  | 79  | 174 | 21  | 118 |
| 18  | 43  | 14 | 203 | 50  | 111 | 27  |
| 10  | 45  | 13 | 16  | 16  | 19  | 92  |
| 28  | 40  | 14 | 235 | 66  | 37  | 14  |
| 22  | 39  | 21 | 57  | 85  | 9   | 91  |
| 32  | 59  | 35 | 70  | 88  | 29  | 48  |
| 17  | 42  | 14 | 192 | 48  | 104 | 26  |
| 12  | 58  | 6  | 38  | 18  | 37  | 95  |
| 94  | 33  | 50 | 49  | 96  | 20  | 24  |
| 22  | 49  | 29 | 154 | 142 | 31  | 52  |
| 48  | 58  | 75 | 2   | 104 | 0   | 26  |
| 21  | 9   | 1  | 116 | 16  | 14  | 2   |
| 47  | 69  | 25 | 139 | 93  | 29  | 71  |
| 39  | 53  | 52 | 87  | 69  | 49  | 141 |
| 27  | 34  | 33 | 96  | 109 | 11  | 78  |
| 108 | 108 | 79 | 48  | 130 | 20  | 30  |
| 34  | 54  | 5  | 142 | 20  | 80  | 31  |
| 20  | 17  | 24 | 111 | 33  | 25  | 34  |
| 34  | 46  | 25 | 63  | 53  | 4   | 19  |
| 10  | 53  | 51 | 147 | 94  | 24  | 69  |
| 53  | 88  | 19 | 70  | 114 | 26  | 31  |
| 28  | 12  | 23 | 61  | 87  | 4   | 39  |
| 29  | 45  | 21 | 100 | 73  | 18  | 42  |
| 18  | 43  | 39 | 118 | 73  | 25  | 167 |
| 12  | 28  | 10 | 81  | 30  | 15  | 10  |
| 14  | 80  | 8  | 23  | 35  | 19  | 25  |
| 33  | 42  | 35 | 83  | 107 | 19  | 25  |
| 32  | 75  | 22 | 72  | 80  | 3   | 63  |
| 76  | 18  | 14 | 36  | 78  | 8   | 15  |
| 29  | 43  | 33 | 32  | 51  | 30  | 34  |
| 42  | 68  | 42 | 55  | 124 | 20  | 58  |
| 27  | 71  | 28 | 107 | 114 | 19  | 63  |
| 4   | 40  | 5  | 84  | 17  | 81  | 32  |
| 40  | 26  | 37 | 36  | 37  | 3   | 20  |
| 24  | 46  | 27 | 123 | 38  | 6   | 37  |
| 34  | 46  | 24 | 123 | 88  | 12  | 63  |
| 38  | 45  | 30 | 100 | 97  | 20  | 35  |
| 32  | 56  | 19 | 97  | 57  | 27  | 51  |
| 0   | 1   | 3  | 13  | 4   | 9   | 0   |
| 22  | 52  | 13 | 72  | 72  | 23  | 27  |
| 46  | 58  | 1  | 65  | 19  | 4   | 33  |
| 22  | 38  | 36 | 30  | 47  | 3   | 28  |



|    |    |    |     |    |    |    |
|----|----|----|-----|----|----|----|
| 26 | 61 | 0  | 50  | 71 | 11 | 12 |
| 11 | 30 | 12 | 52  | 29 | 3  | 24 |
| 9  | 56 | 3  | 25  | 10 | 10 | 20 |
| 29 | 29 | 24 | 32  | 35 | 16 | 29 |
| 15 | 52 | 24 | 45  | 64 | 40 | 33 |
| 10 | 57 | 26 | 18  | 37 | 5  | 16 |
| 22 | 25 | 11 | 21  | 61 | 8  | 23 |
| 16 | 34 | 22 | 37  | 62 | 14 | 11 |
| 11 | 13 | 9  | 81  | 27 | 9  | 7  |
| 20 | 25 | 26 | 59  | 33 | 8  | 41 |
| 2  | 2  | 2  | 21  | 8  | 9  | 1  |
| 20 | 17 | 16 | 30  | 70 | 3  | 9  |
| 24 | 41 | 23 | 43  | 39 | 5  | 16 |
| 13 | 34 | 25 | 24  | 90 | 3  | 17 |
| 31 | 26 | 33 | 34  | 77 | 4  | 9  |
| 8  | 42 | 5  | 70  | 54 | 15 | 22 |
| 21 | 24 | 6  | 55  | 51 | 23 | 4  |
| 21 | 31 | 22 | 61  | 82 | 3  | 32 |
| 1  | 23 | 4  | 12  | 12 | 10 | 31 |
| 14 | 42 | 11 | 55  | 40 | 3  | 9  |
| 3  | 8  | 2  | 117 | 24 | 35 | 7  |
| 23 | 31 | 17 | 64  | 57 | 11 | 16 |
| 23 | 31 | 17 | 64  | 57 | 11 | 16 |
| 2  | 16 | 4  | 8   | 13 | 6  | 31 |
| 13 | 32 | 28 | 29  | 39 | 3  | 18 |
| 21 | 16 | 15 | 32  | 62 | 6  | 13 |
| 7  | 44 | 4  | 14  | 20 | 13 | 15 |
| 18 | 42 | 20 | 57  | 52 | 5  | 18 |
| 13 | 36 | 8  | 48  | 57 | 6  | 9  |
| 3  | 19 | 19 | 51  | 18 | 17 | 76 |
| 10 | 19 | 33 | 19  | 46 | 11 | 9  |
| 11 | 32 | 13 | 30  | 38 | 12 | 9  |
| 14 | 34 | 11 | 100 | 37 | 19 | 20 |
| 6  | 8  | 10 | 19  | 24 | 9  | 14 |
| 37 | 25 | 11 | 10  | 33 | 13 | 2  |
| 12 | 22 | 14 | 28  | 51 | 10 | 6  |
| 0  | 0  | 2  | 4   | 3  | 0  | 1  |
| 14 | 32 | 14 | 28  | 39 | 8  | 7  |
| 10 | 19 | 12 | 69  | 31 | 14 | 14 |
| 15 | 36 | 19 | 38  | 54 | 22 | 24 |
| 10 | 5  | 21 | 17  | 20 | 5  | 21 |
| 10 | 17 | 11 | 63  | 29 | 11 | 12 |
| 16 | 20 | 8  | 13  | 40 | 4  | 26 |
| 16 | 26 | 14 | 6   | 39 | 11 | 9  |
| 9  | 31 | 14 | 46  | 28 | 3  | 11 |
| 8  | 18 | 23 | 19  | 32 | 9  | 8  |
| 1  | 0  | 0  | 1   | 1  | 1  | 0  |
| 16 | 33 | 20 | 12  | 29 | 12 | 8  |
| 16 | 11 | 17 | 13  | 10 | 1  | 15 |
| 12 | 20 | 13 | 16  | 28 | 7  | 11 |
| 6  | 18 | 6  | 8   | 21 | 4  | 16 |
| 6  | 20 | 5  | 54  | 13 | 26 | 11 |
| 1  | 1  | 1  | 5   | 0  | 45 | 0  |
| 9  | 15 | 11 | 12  | 51 | 4  | 13 |
| 7  | 19 | 1  | 41  | 14 | 10 | 5  |
| 53 | 0  | 0  | 0   | 0  | 0  | 0  |
| 23 | 31 | 13 | 14  | 36 | 7  | 10 |
| 7  | 3  | 12 | 48  | 29 | 8  | 8  |
| 9  | 9  | 8  | 25  | 20 | 5  | 9  |

|    |    |    |    |    |    |    |
|----|----|----|----|----|----|----|
| 2  | 8  | 6  | 4  | 13 | 3  | 9  |
| 5  | 17 | 6  | 23 | 17 | 11 | 15 |
| 3  | 15 | 6  | 11 | 5  | 15 | 14 |
| 10 | 17 | 17 | 24 | 42 | 2  | 8  |
| 15 | 8  | 9  | 16 | 21 | 3  | 12 |
| 10 | 13 | 15 | 20 | 35 | 4  | 12 |
| 7  | 18 | 1  | 36 | 14 | 8  | 5  |
| 2  | 19 | 4  | 13 | 1  | 5  | 13 |
| 1  | 0  | 2  | 5  | 3  | 19 | 3  |
| 8  | 20 | 4  | 19 | 6  | 8  | 4  |
| 8  | 23 | 17 | 44 | 27 | 13 | 5  |
| 12 | 19 | 7  | 24 | 19 | 2  | 10 |
| 3  | 13 | 7  | 30 | 11 | 7  | 12 |
| 14 | 25 | 7  | 18 | 19 | 4  | 2  |
| 2  | 16 | 3  | 5  | 8  | 11 | 15 |
| 7  | 13 | 7  | 41 | 10 | 16 | 8  |
| 12 | 6  | 3  | 23 | 11 | 13 | 10 |
| 12 | 20 | 7  | 22 | 35 | 2  | 3  |
| 12 | 16 | 7  | 15 | 19 | 4  | 12 |
| 4  | 15 | 1  | 11 | 5  | 0  | 4  |
| 3  | 14 | 2  | 4  | 9  | 4  | 13 |
| 4  | 27 | 10 | 20 | 26 | 3  | 12 |
| 6  | 12 | 10 | 22 | 24 | 5  | 15 |
| 8  | 6  | 7  | 4  | 19 | 5  | 8  |
| 7  | 9  | 3  | 51 | 11 | 6  | 9  |
| 8  | 24 | 5  | 24 | 29 | 7  | 3  |
| 11 | 18 | 7  | 8  | 23 | 0  | 12 |
| 4  | 11 | 7  | 9  | 16 | 2  | 13 |
| 4  | 18 | 4  | 13 | 32 | 2  | 10 |
| 11 | 18 | 7  | 24 | 26 | 1  | 9  |
| 6  | 10 | 8  | 28 | 12 | 14 | 22 |
| 3  | 8  | 2  | 29 | 2  | 28 | 1  |
| 1  | 6  | 5  | 38 | 10 | 2  | 4  |
| 6  | 4  | 2  | 24 | 12 | 10 | 21 |
| 5  | 11 | 7  | 21 | 25 | 6  | 8  |
| 5  | 10 | 6  | 8  | 15 | 1  | 10 |
| 11 | 11 | 2  | 17 | 5  | 3  | 26 |
| 7  | 18 | 9  | 25 | 18 | 1  | 8  |
| 7  | 14 | 12 | 7  | 14 | 6  | 7  |
| 5  | 9  | 10 | 13 | 23 | 9  | 9  |
| 5  | 7  | 3  | 28 | 9  | 7  | 5  |
| 6  | 13 | 3  | 32 | 17 | 10 | 24 |
| 0  | 20 | 0  | 4  | 10 | 4  | 11 |
| 15 | 5  | 12 | 20 | 35 | 3  | 7  |
| 4  | 17 | 3  | 9  | 10 | 8  | 4  |
| 4  | 12 | 0  | 15 | 9  | 1  | 7  |
| 5  | 15 | 13 | 10 | 14 | 3  | 7  |
| 3  | 10 | 4  | 9  | 7  | 10 | 9  |
| 5  | 3  | 6  | 6  | 13 | 0  | 4  |
| 2  | 19 | 1  | 14 | 21 | 6  | 6  |
| 5  | 11 | 3  | 3  | 11 | 2  | 3  |
| 3  | 3  | 2  | 0  | 2  | 0  | 1  |
| 9  | 5  | 8  | 6  | 13 | 1  | 5  |
| 3  | 9  | 3  | 20 | 11 | 13 | 2  |
| 8  | 10 | 11 | 5  | 6  | 4  | 7  |
| 7  | 8  | 2  | 37 | 17 | 9  | 16 |
| 4  | 14 | 3  | 22 | 27 | 0  | 17 |
| 5  | 4  | 3  | 27 | 27 | 2  | 3  |
| 3  | 6  | 7  | 21 | 5  | 4  | 8  |

|    |    |    |    |    |   |    |
|----|----|----|----|----|---|----|
| 5  | 7  | 3  | 12 | 14 | 7 | 12 |
| 11 | 3  | 7  | 8  | 20 | 4 | 13 |
| 4  | 9  | 4  | 42 | 20 | 6 | 10 |
| 7  | 7  | 3  | 12 | 15 | 1 | 5  |
| 1  | 11 | 11 | 20 | 10 | 6 | 8  |
| 11 | 3  | 7  | 8  | 15 | 1 | 9  |
| 6  | 6  | 3  | 10 | 12 | 1 | 1  |
| 1  | 1  | 0  | 6  | 3  | 7 | 4  |
| 4  | 7  | 6  | 15 | 8  | 6 | 6  |
| 2  | 17 | 6  | 13 | 16 | 4 | 8  |
| 8  | 7  | 4  | 15 | 10 | 0 | 9  |
| 8  | 7  | 2  | 18 | 10 | 3 | 5  |
| 2  | 5  | 9  | 8  | 7  | 6 | 17 |
| 1  | 3  | 0  | 19 | 1  | 1 | 1  |
| 7  | 12 | 3  | 14 | 4  | 7 | 2  |
| 3  | 11 | 1  | 14 | 6  | 2 | 6  |
| 7  | 16 | 0  | 13 | 11 | 2 | 3  |
| 4  | 4  | 7  | 12 | 17 | 5 | 7  |
| 3  | 6  | 0  | 17 | 2  | 0 | 3  |
| 2  | 12 | 3  | 8  | 13 | 0 | 3  |
| 4  | 7  | 2  | 22 | 8  | 4 | 7  |
| 6  | 4  | 2  | 20 | 12 | 1 | 7  |
| 4  | 18 | 6  | 6  | 23 | 7 | 12 |
| 4  | 5  | 3  | 10 | 7  | 0 | 7  |
| 5  | 6  | 9  | 4  | 3  | 0 | 14 |
| 1  | 5  | 1  | 9  | 6  | 4 | 5  |
| 4  | 2  | 1  | 38 | 5  | 7 | 1  |
| 2  | 1  | 2  | 18 | 3  | 1 | 2  |
| 7  | 7  | 3  | 5  | 6  | 6 | 21 |
| 3  | 11 | 6  | 10 | 13 | 1 | 4  |
| 1  | 4  | 5  | 8  | 14 | 0 | 23 |
| 2  | 14 | 6  | 12 | 11 | 5 | 7  |
| 2  | 13 | 7  | 11 | 8  | 2 | 10 |
| 5  | 11 | 6  | 6  | 11 | 0 | 3  |
| 2  | 4  | 3  | 12 | 4  | 1 | 2  |
| 0  | 2  | 2  | 0  | 3  | 2 | 7  |
| 4  | 5  | 1  | 18 | 13 | 1 | 5  |
| 4  | 3  | 1  | 8  | 12 | 5 | 5  |
| 6  | 8  | 3  | 7  | 5  | 0 | 3  |
| 2  | 10 | 1  | 9  | 4  | 1 | 7  |
| 3  | 8  | 2  | 10 | 6  | 4 | 2  |
| 5  | 19 | 7  | 6  | 17 | 0 | 5  |
| 1  | 7  | 1  | 4  | 3  | 1 | 5  |
| 14 | 3  | 2  | 10 | 13 | 2 | 6  |
| 5  | 11 | 5  | 7  | 16 | 1 | 5  |
| 3  | 2  | 2  | 13 | 7  | 2 | 3  |
| 5  | 10 | 4  | 9  | 16 | 0 | 1  |
| 3  | 2  | 1  | 8  | 5  | 1 | 3  |
| 2  | 5  | 0  | 9  | 5  | 4 | 0  |
| 5  | 3  | 0  | 41 | 3  | 0 | 1  |
| 1  | 4  | 0  | 3  | 5  | 1 | 6  |
| 2  | 16 | 3  | 2  | 1  | 1 | 0  |
| 2  | 4  | 1  | 12 | 4  | 1 | 0  |
| 4  | 3  | 0  | 7  | 16 | 0 | 7  |
| 4  | 5  | 3  | 5  | 8  | 3 | 2  |
| 0  | 0  | 1  | 8  | 5  | 8 | 1  |
| 4  | 10 | 2  | 8  | 4  | 2 | 9  |
| 5  | 5  | 5  | 8  | 5  | 1 | 3  |
| 7  | 2  | 0  | 5  | 11 | 0 | 0  |

|   |    |   |    |    |    |    |
|---|----|---|----|----|----|----|
| 2 | 0  | 2 | 8  | 4  | 0  | 3  |
| 4 | 4  | 3 | 5  | 2  | 2  | 2  |
| 2 | 6  | 0 | 19 | 4  | 10 | 3  |
| 0 | 5  | 1 | 8  | 0  | 4  | 2  |
| 4 | 5  | 1 | 3  | 3  | 5  | 5  |
| 2 | 2  | 1 | 2  | 9  | 5  | 1  |
| 1 | 2  | 6 | 5  | 4  | 0  | 8  |
| 2 | 7  | 3 | 6  | 7  | 4  | 2  |
| 4 | 4  | 3 | 2  | 5  | 0  | 8  |
| 0 | 4  | 3 | 6  | 3  | 2  | 7  |
| 3 | 2  | 1 | 19 | 2  | 4  | 3  |
| 0 | 3  | 1 | 2  | 4  | 2  | 0  |
| 0 | 0  | 0 | 1  | 0  | 1  | 0  |
| 2 | 8  | 3 | 9  | 6  | 1  | 0  |
| 1 | 2  | 2 | 3  | 3  | 1  | 2  |
| 0 | 3  | 0 | 6  | 3  | 2  | 5  |
| 1 | 3  | 6 | 2  | 8  | 1  | 5  |
| 3 | 0  | 4 | 3  | 4  | 0  | 3  |
| 0 | 0  | 0 | 0  | 0  | 0  | 1  |
| 0 | 5  | 0 | 1  | 2  | 12 | 1  |
| 0 | 4  | 0 | 2  | 1  | 2  | 1  |
| 0 | 6  | 0 | 11 | 3  | 2  | 0  |
| 7 | 3  | 2 | 7  | 15 | 1  | 2  |
| 4 | 3  | 1 | 1  | 17 | 3  | 0  |
| 0 | 3  | 2 | 2  | 7  | 0  | 4  |
| 0 | 1  | 0 | 8  | 0  | 2  | 0  |
| 3 | 11 | 5 | 2  | 4  | 0  | 1  |
| 2 | 2  | 1 | 22 | 7  | 4  | 6  |
| 5 | 2  | 3 | 3  | 11 | 0  | 5  |
| 3 | 5  | 2 | 10 | 6  | 2  | 2  |
| 2 | 0  | 1 | 3  | 1  | 1  | 0  |
| 4 | 1  | 1 | 12 | 7  | 0  | 1  |
| 1 | 1  | 0 | 8  | 7  | 1  | 6  |
| 0 | 4  | 1 | 2  | 8  | 3  | 1  |
| 0 | 4  | 1 | 10 | 5  | 3  | 0  |
| 2 | 3  | 1 | 5  | 5  | 1  | 5  |
| 0 | 7  | 0 | 3  | 5  | 0  | 5  |
| 3 | 1  | 2 | 6  | 1  | 0  | 2  |
| 4 | 7  | 1 | 9  | 4  | 1  | 2  |
| 1 | 3  | 1 | 1  | 0  | 1  | 3  |
| 0 | 0  | 1 | 0  | 0  | 0  | 0  |
| 5 | 4  | 1 | 10 | 6  | 3  | 3  |
| 1 | 3  | 1 | 9  | 3  | 1  | 4  |
| 1 | 7  | 0 | 9  | 7  | 0  | 10 |
| 1 | 4  | 2 | 9  | 6  | 0  | 7  |
| 1 | 5  | 1 | 2  | 0  | 0  | 1  |
| 0 | 1  | 1 | 13 | 3  | 5  | 0  |
| 4 | 2  | 1 | 4  | 9  | 0  | 0  |
| 2 | 5  | 1 | 6  | 5  | 0  | 1  |
| 1 | 2  | 3 | 3  | 7  | 1  | 1  |
| 0 | 1  | 1 | 5  | 5  | 5  | 6  |
| 1 | 2  | 2 | 5  | 4  | 1  | 1  |
| 0 | 1  | 1 | 2  | 1  | 0  | 2  |
| 2 | 1  | 4 | 6  | 3  | 2  | 5  |
| 3 | 5  | 1 | 6  | 7  | 0  | 1  |
| 2 | 1  | 1 | 7  | 5  | 3  | 2  |
| 1 | 1  | 2 | 1  | 3  | 0  | 3  |
| 2 | 1  | 1 | 0  | 2  | 4  | 1  |
| 1 | 1  | 2 | 0  | 2  | 0  | 2  |

|    |   |   |   |    |    |   |
|----|---|---|---|----|----|---|
| 3  | 1 | 1 | 0 | 3  | 0  | 0 |
| 1  | 2 | 1 | 1 | 4  | 2  | 2 |
| 2  | 3 | 4 | 5 | 4  | 3  | 2 |
| 1  | 4 | 0 | 4 | 2  | 0  | 1 |
| 1  | 2 | 2 | 5 | 10 | 0  | 0 |
| 0  | 0 | 0 | 2 | 1  | 2  | 1 |
| 1  | 4 | 0 | 0 | 3  | 0  | 2 |
| 3  | 3 | 0 | 4 | 2  | 0  | 0 |
| 5  | 4 | 2 | 5 | 7  | 3  | 6 |
| 1  | 2 | 0 | 2 | 1  | 3  | 0 |
| 10 | 3 | 2 | 6 | 2  | 0  | 2 |
| 0  | 2 | 0 | 1 | 3  | 0  | 1 |
| 0  | 0 | 1 | 4 | 0  | 2  | 1 |
| 3  | 0 | 2 | 1 | 5  | 0  | 3 |
| 3  | 2 | 1 | 4 | 4  | 2  | 1 |
| 2  | 2 | 2 | 2 | 3  | 2  | 0 |
| 1  | 3 | 2 | 6 | 8  | 1  | 3 |
| 0  | 1 | 0 | 1 | 1  | 1  | 0 |
| 1  | 0 | 0 | 5 | 1  | 5  | 1 |
| 0  | 0 | 1 | 1 | 1  | 1  | 0 |
| 3  | 1 | 1 | 3 | 0  | 0  | 0 |
| 0  | 0 | 0 | 2 | 0  | 2  | 0 |
| 0  | 0 | 1 | 6 | 0  | 2  | 0 |
| 1  | 1 | 3 | 0 | 5  | 0  | 5 |
| 0  | 1 | 0 | 4 | 7  | 2  | 3 |
| 4  | 2 | 0 | 6 | 2  | 1  | 1 |
| 3  | 1 | 0 | 7 | 4  | 4  | 3 |
| 2  | 1 | 2 | 3 | 9  | 1  | 0 |
| 0  | 0 | 0 | 2 | 0  | 0  | 1 |
| 1  | 0 | 0 | 1 | 0  | 1  | 1 |
| 1  | 2 | 2 | 3 | 0  | 0  | 0 |
| 0  | 2 | 1 | 2 | 4  | 0  | 1 |
| 2  | 3 | 0 | 2 | 4  | 0  | 2 |
| 2  | 2 | 0 | 2 | 2  | 0  | 0 |
| 0  | 3 | 1 | 3 | 4  | 2  | 0 |
| 1  | 1 | 1 | 7 | 2  | 1  | 1 |
| 1  | 1 | 1 | 1 | 3  | 0  | 3 |
| 0  | 3 | 0 | 2 | 1  | 3  | 0 |
| 1  | 3 | 1 | 2 | 6  | 1  | 0 |
| 0  | 1 | 0 | 0 | 5  | 0  | 2 |
| 0  | 0 | 0 | 2 | 1  | 0  | 1 |
| 1  | 2 | 1 | 0 | 3  | 0  | 1 |
| 2  | 0 | 2 | 5 | 7  | 0  | 0 |
| 2  | 1 | 0 | 2 | 4  | 0  | 1 |
| 4  | 2 | 1 | 5 | 6  | 2  | 5 |
| 0  | 2 | 1 | 4 | 2  | 2  | 3 |
| 0  | 2 | 1 | 2 | 0  | 2  | 1 |
| 0  | 1 | 4 | 0 | 4  | 3  | 1 |
| 3  | 1 | 1 | 2 | 1  | 0  | 1 |
| 2  | 0 | 1 | 1 | 3  | 0  | 1 |
| 2  | 3 | 1 | 3 | 3  | 0  | 0 |
| 0  | 0 | 0 | 2 | 2  | 13 | 0 |
| 0  | 0 | 1 | 2 | 0  | 0  | 0 |
| 0  | 9 | 3 | 1 | 0  | 1  | 3 |
| 0  | 2 | 2 | 4 | 0  | 0  | 3 |
| 1  | 1 | 1 | 3 | 0  | 1  | 2 |
| 1  | 2 | 1 | 1 | 2  | 0  | 0 |
| 2  | 2 | 1 | 5 | 1  | 2  | 2 |
| 1  | 2 | 0 | 7 | 2  | 0  | 2 |

|         |        |       |         |         |         |         |
|---------|--------|-------|---------|---------|---------|---------|
| 1       | 6      | 2     | 2       | 2       | 0       | 1       |
| 1       | 2      | 0     | 1       | 0       | 0       | 2       |
| 0       | 1      | 1     | 7       | 4       | 1       | 0       |
| 0       | 0      | 1     | 3       | 1       | 0       | 3       |
| 1       | 2      | 2     | 3       | 4       | 1       | 0       |
| 1       | 1      | 0     | 0       | 0       | 1       | 0       |
| 0       | 0      | 1     | 0       | 2       | 1       | 0       |
| 1       | 0      | 1     | 0       | 6       | 0       | 0       |
| 3       | 1      | 1     | 1       | 1       | 0       | 3       |
| 2       | 0      | 0     | 0       | 0       | 1       | 1       |
| 0       | 2      | 1     | 4       | 1       | 1       | 1       |
| 0       | 1      | 0     | 6       | 2       | 0       | 1       |
| 0       | 0      | 1     | 0       | 0       | 0       | 0       |
| E_7     | E_8    | E_9   | F_40    | F_41    | F_42    | F_44    |
| CHR_P   | CHR_P  | CHR_P | CHR_P   | CHR_P   | CHR_P   | CHR_P   |
| 1172863 | 906893 | 0     | 1936737 | 2227935 | 3040120 | 1921719 |
| 16      | 10     | 0     | 11      | 14      | 23      | 14      |
| -1.08   | -2.42  | -4.49 | -2.08   | -1.63   | 0.36    | -1.63   |

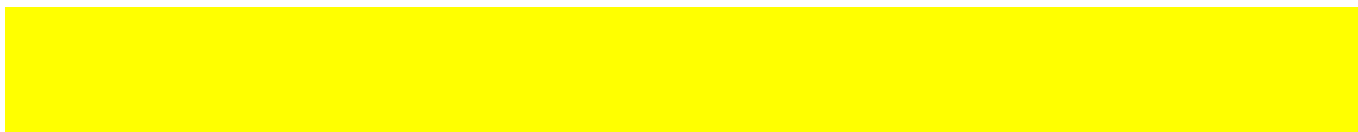

|         |         |        |        |
|---------|---------|--------|--------|
| 0.92    | 0.85    | 0.10   | 0.04   |
| 3       | 5       | 23     | 27     |
| 1       | 1       | 1      | 1      |
| 92      | 93      | 94     | 95     |
| 27      | 28      | 29     | 30     |
| F_44    | F_9     | G_10   | G_9    |
| CHR_P   | CHR_P   | CHR_P  | CHR_P  |
| 2580829 | 1797912 | 999373 | 336028 |
| F_44    | F_9     | G_10   | G_9    |
| 1338069 | 652973  | 273186 | 110265 |
| 219682  | 122940  | 215390 | 26137  |
| 145667  | 125931  | 14419  | 12206  |
| 146527  | 186789  | 94406  | 16565  |
| 146024  | 206210  | 54647  | 23910  |
| 23965   | 18035   | 33221  | 13330  |
| 54262   | 49594   | 58222  | 18835  |
| 2532    | 2158    | 5400   | 2740   |
| 18985   | 20381   | 24629  | 8586   |
| 66948   | 27101   | 30790  | 21344  |
| 51409   | 22088   | 14122  | 13068  |
| 22650   | 38405   | 10022  | 4659   |
| 26369   | 23357   | 12687  | 5899   |
| 18005   | 28494   | 9022   | 4547   |
| 7585    | 4309    | 7370   | 1032   |
| 13509   | 30687   | 2256   | 1015   |
| 8712    | 3110    | 7239   | 1515   |
| 15137   | 10154   | 4100   | 1477   |
| 7645    | 6488    | 7688   | 4923   |

|       |       |       |      |
|-------|-------|-------|------|
| 19478 | 11759 | 8333  | 2437 |
| 15258 | 13778 | 2678  | 1067 |
| 10258 | 7317  | 5535  | 2832 |
| 36115 | 9239  | 10632 | 2095 |
| 2938  | 3395  | 4481  | 1400 |
| 2871  | 2070  | 6408  | 1265 |
| 13895 | 9703  | 2308  | 978  |
| 7480  | 9474  | 2078  | 1197 |
| 2518  | 1255  | 4845  | 1918 |
| 4053  | 4359  | 3250  | 924  |
| 13764 | 9512  | 6491  | 2815 |
| 4276  | 4603  | 2770  | 869  |
| 3427  | 12922 | 3134  | 588  |
| 2360  | 3220  | 1694  | 817  |
| 1637  | 1446  | 727   | 643  |
| 3737  | 4101  | 2969  | 836  |
| 3723  | 5538  | 3098  | 1501 |
| 3703  | 1877  | 4939  | 1697 |
| 2694  | 1720  | 4607  | 1218 |
| 6980  | 2197  | 1705  | 513  |
| 1265  | 8631  | 643   | 269  |
| 3486  | 7199  | 727   | 289  |
| 5368  | 7016  | 1233  | 671  |
| 3096  | 3313  | 1092  | 508  |
| 842   | 360   | 945   | 324  |
| 1233  | 2024  | 714   | 802  |
| 3552  | 3764  | 949   | 354  |
| 2688  | 2927  | 2751  | 1307 |
| 4563  | 2903  | 881   | 384  |
| 262   | 327   | 261   | 71   |
| 1640  | 981   | 551   | 116  |
| 3186  | 2777  | 666   | 582  |
| 1227  | 1077  | 852   | 255  |
| 1808  | 1598  | 871   | 640  |
| 3430  | 1413  | 900   | 66   |
| 1362  | 3332  | 947   | 355  |
| 210   | 143   | 97    | 88   |
| 751   | 1221  | 787   | 241  |
| 1108  | 2006  | 703   | 130  |
| 2932  | 1472  | 581   | 339  |
| 1721  | 2035  | 991   | 121  |
| 1111  | 1181  | 576   | 315  |
| 916   | 1186  | 720   | 152  |
| 153   | 69    | 254   | 135  |
| 87    | 100   | 35    | 18   |
| 2376  | 1183  | 538   | 156  |
| 492   | 442   | 577   | 193  |
| 347   | 444   | 187   | 479  |
| 266   | 297   | 384   | 67   |
| 563   | 816   | 222   | 80   |
| 1158  | 271   | 1598  | 459  |
| 1184  | 1228  | 272   | 239  |
| 1493  | 1379  | 153   | 72   |
| 285   | 130   | 829   | 122  |
| 1266  | 602   | 377   | 174  |
| 724   | 629   | 336   | 141  |
| 1106  | 1819  | 168   | 157  |
| 804   | 1044  | 896   | 349  |
| 724   | 766   | 699   | 209  |

|      |      |     |     |
|------|------|-----|-----|
| 540  | 1301 | 188 | 65  |
| 568  | 462  | 283 | 188 |
| 399  | 606  | 236 | 100 |
| 1007 | 1014 | 207 | 88  |
| 1139 | 683  | 295 | 88  |
| 400  | 579  | 46  | 292 |
| 466  | 549  | 626 | 110 |
| 253  | 747  | 128 | 141 |
| 1113 | 873  | 250 | 74  |
| 84   | 84   | 153 | 52  |
| 626  | 354  | 192 | 83  |
| 403  | 1253 | 261 | 24  |
| 1575 | 1101 | 237 | 84  |
| 15   | 9    | 18  | 13  |
| 442  | 589  | 127 | 25  |
| 168  | 278  | 152 | 48  |
| 77   | 67   | 67  | 39  |
| 136  | 198  | 80  | 26  |
| 866  | 664  | 149 | 24  |
| 653  | 469  | 136 | 52  |
| 639  | 587  | 145 | 102 |
| 68   | 45   | 119 | 30  |
| 279  | 246  | 51  | 87  |
| 324  | 423  | 121 | 51  |
| 368  | 515  | 53  | 77  |
| 184  | 226  | 493 | 95  |
| 198  | 115  | 95  | 68  |
| 129  | 68   | 90  | 27  |
| 429  | 357  | 71  | 42  |
| 289  | 211  | 228 | 89  |
| 95   | 174  | 62  | 23  |
| 67   | 106  | 168 | 62  |
| 214  | 309  | 124 | 31  |
| 432  | 351  | 83  | 33  |
| 230  | 206  | 91  | 75  |
| 102  | 76   | 210 | 30  |
| 136  | 301  | 29  | 14  |
| 164  | 411  | 102 | 49  |
| 156  | 110  | 300 | 21  |
| 148  | 153  | 120 | 54  |
| 148  | 153  | 120 | 54  |
| 79   | 114  | 79  | 73  |
| 87   | 244  | 55  | 94  |
| 394  | 208  | 48  | 22  |
| 101  | 288  | 46  | 20  |
| 168  | 139  | 95  | 19  |
| 18   | 39   | 4   | 0   |
| 202  | 312  | 44  | 17  |
| 106  | 179  | 77  | 68  |
| 207  | 258  | 22  | 12  |
| 197  | 232  | 78  | 16  |
| 286  | 305  | 73  | 1   |
| 111  | 78   | 193 | 131 |
| 162  | 171  | 38  | 26  |
| 44   | 109  | 105 | 47  |
| 130  | 187  | 21  | 21  |
| 66   | 135  | 41  | 28  |
| 189  | 139  | 72  | 53  |
| 63   | 122  | 72  | 32  |



|     |     |     |     |
|-----|-----|-----|-----|
| 74  | 98  | 35  | 29  |
| 48  | 208 | 25  | 22  |
| 70  | 209 | 23  | 14  |
| 90  | 195 | 135 | 18  |
| 107 | 109 | 28  | 26  |
| 35  | 248 | 7   | 4   |
| 75  | 196 | 54  | 5   |
| 10  | 16  | 11  | 5   |
| 109 | 101 | 37  | 15  |
| 152 | 134 | 37  | 6   |
| 59  | 72  | 37  | 11  |
| 116 | 70  | 53  | 21  |
| 74  | 83  | 24  | 28  |
| 91  | 26  | 28  | 24  |
| 17  | 32  | 36  | 16  |
| 47  | 101 | 17  | 18  |
| 114 | 148 | 38  | 12  |
| 7   | 90  | 6   | 2   |
| 126 | 55  | 32  | 29  |
| 54  | 60  | 102 | 12  |
| 35  | 68  | 21  | 52  |
| 67  | 94  | 17  | 16  |
| 49  | 82  | 29  | 11  |
| 10  | 9   | 12  | 1   |
| 80  | 66  | 23  | 26  |
| 76  | 100 | 29  | 20  |
| 62  | 37  | 27  | 5   |
| 72  | 38  | 25  | 6   |
| 74  | 84  | 33  | 8   |
| 88  | 81  | 37  | 10  |
| 34  | 58  | 21  | 171 |
| 8   | 43  | 9   | 4   |
| 61  | 116 | 36  | 10  |
| 22  | 46  | 29  | 14  |
| 75  | 48  | 31  | 23  |
| 146 | 94  | 43  | 23  |
| 75  | 53  | 45  | 14  |
| 44  | 24  | 40  | 5   |
| 60  | 136 | 16  | 4   |
| 83  | 66  | 17  | 33  |
| 67  | 55  | 31  | 13  |
| 52  | 45  | 16  | 20  |
| 43  | 91  | 5   | 13  |
| 118 | 76  | 21  | 16  |
| 27  | 18  | 24  | 6   |
| 92  | 92  | 7   | 16  |
| 14  | 17  | 49  | 11  |
| 91  | 73  | 16  | 12  |
| 48  | 101 | 13  | 4   |
| 26  | 17  | 23  | 6   |
| 95  | 81  | 4   | 11  |
| 24  | 68  | 18  | 19  |
| 52  | 55  | 38  | 11  |
| 26  | 73  | 2   | 0   |
| 2   | 6   | 29  | 4   |
| 71  | 50  | 15  | 0   |
| 141 | 106 | 26  | 0   |
| 78  | 26  | 41  | 23  |
| 30  | 46  | 40  | 4   |

|     |     |    |    |
|-----|-----|----|----|
| 31  | 19  | 16 | 1  |
| 34  | 51  | 23 | 8  |
| 19  | 45  | 10 | 14 |
| 69  | 46  | 8  | 5  |
| 31  | 125 | 28 | 0  |
| 39  | 17  | 7  | 7  |
| 42  | 139 | 17 | 4  |
| 167 | 62  | 33 | 15 |
| 10  | 9   | 10 | 6  |
| 25  | 153 | 9  | 3  |
| 25  | 80  | 29 | 14 |
| 63  | 49  | 23 | 6  |
| 15  | 12  | 23 | 8  |
| 34  | 27  | 15 | 11 |
| 58  | 77  | 8  | 4  |
| 63  | 41  | 13 | 8  |
| 32  | 31  | 7  | 5  |
| 20  | 40  | 13 | 6  |
| 37  | 34  | 13 | 9  |
| 63  | 44  | 27 | 1  |
| 35  | 41  | 14 | 3  |
| 51  | 43  | 18 | 6  |
| 0   | 0   | 0  | 0  |
| 27  | 35  | 25 | 3  |
| 33  | 1   | 40 | 3  |
| 28  | 23  | 9  | 14 |
| 12  | 51  | 4  | 7  |
| 24  | 26  | 10 | 21 |
| 20  | 43  | 5  | 0  |
| 29  | 66  | 4  | 2  |
| 33  | 47  | 7  | 3  |
| 16  | 38  | 4  | 3  |
| 23  | 32  | 9  | 7  |
| 11  | 17  | 6  | 4  |
| 7   | 7   | 21 | 7  |
| 41  | 30  | 10 | 5  |
| 1   | 1   | 2  | 1  |
| 9   | 33  | 4  | 2  |
| 16  | 28  | 6  | 3  |
| 17  | 19  | 9  | 13 |
| 9   | 18  | 4  | 3  |
| 22  | 27  | 9  | 3  |
| 4   | 16  | 5  | 2  |
| 32  | 36  | 5  | 7  |
| 31  | 17  | 6  | 8  |
| 9   | 28  | 5  | 7  |
| 7   | 4   | 19 | 1  |
| 16  | 24  | 12 | 2  |
| 16  | 24  | 12 | 2  |
| 31  | 41  | 1  | 1  |
| 18  | 40  | 12 | 2  |
| 13  | 18  | 12 | 5  |
| 15  | 35  | 3  | 4  |
| 18  | 8   | 13 | 3  |
| 9   | 24  | 7  | 2  |
| 76  | 8   | 5  | 6  |
| 9   | 28  | 10 | 2  |
| 9   | 54  | 2  | 0  |
| 20  | 7   | 12 | 3  |

|    |    |    |   |
|----|----|----|---|
| 14 | 16 | 41 | 1 |
| 2  | 37 | 3  | 2 |
| 6  | 12 | 5  | 2 |
| 1  | 2  | 1  | 0 |
| 7  | 25 | 7  | 4 |
| 14 | 7  | 15 | 3 |
| 24 | 41 | 5  | 1 |
| 21 | 22 | 10 | 4 |
| 12 | 6  | 14 | 3 |
| 26 | 42 | 5  | 4 |
| 9  | 28 | 6  | 0 |
| 11 | 19 | 4  | 7 |
| 8  | 35 | 6  | 4 |
| 0  | 1  | 0  | 2 |
| 8  | 35 | 0  | 2 |
| 15 | 14 | 7  | 3 |
| 11 | 13 | 4  | 0 |
| 16 | 16 | 1  | 3 |
| 11 | 13 | 11 | 1 |
| 0  | 0  | 1  | 0 |
| 13 | 10 | 7  | 2 |
| 5  | 9  | 6  | 2 |
| 0  | 1  | 53 | 0 |
| 10 | 26 | 5  | 2 |
| 8  | 16 | 4  | 0 |
| 9  | 21 | 8  | 1 |
| 9  | 36 | 2  | 3 |
| 15 | 31 | 8  | 2 |
| 14 | 24 | 3  | 0 |
| 8  | 15 | 1  | 5 |
| 12 | 15 | 7  | 2 |
| 12 | 12 | 7  | 0 |
| 5  | 8  | 5  | 2 |
| 13 | 26 | 0  | 6 |
| 3  | 1  | 8  | 2 |
| 4  | 5  | 4  | 1 |
| 5  | 5  | 12 | 5 |
| 10 | 26 | 2  | 1 |
| 12 | 20 | 6  | 6 |
| 2  | 23 | 0  | 0 |
| 15 | 22 | 2  | 3 |
| 8  | 8  | 2  | 2 |
| 10 | 10 | 6  | 2 |
| 3  | 11 | 6  | 5 |
| 12 | 27 | 3  | 1 |
| 4  | 3  | 2  | 0 |
| 13 | 31 | 4  | 1 |
| 12 | 34 | 9  | 1 |
| 15 | 11 | 2  | 0 |
| 8  | 14 | 4  | 1 |
| 9  | 15 | 7  | 2 |
| 3  | 28 | 0  | 0 |
| 12 | 13 | 1  | 1 |
| 13 | 14 | 1  | 3 |
| 10 | 13 | 5  | 2 |
| 9  | 1  | 0  | 2 |
| 22 | 15 | 9  | 6 |
| 1  | 1  | 1  | 0 |
| 4  | 0  | 4  | 1 |

|    |    |    |   |
|----|----|----|---|
| 21 | 4  | 6  | 6 |
| 8  | 4  | 10 | 0 |
| 10 | 8  | 4  | 5 |
| 26 | 23 | 1  | 3 |
| 8  | 11 | 2  | 1 |
| 7  | 27 | 0  | 3 |
| 9  | 23 | 1  | 3 |
| 5  | 3  | 4  | 4 |
| 24 | 13 | 3  | 0 |
| 11 | 17 | 1  | 1 |
| 7  | 23 | 3  | 1 |
| 4  | 14 | 2  | 1 |
| 7  | 4  | 4  | 6 |
| 7  | 16 | 2  | 0 |
| 9  | 3  | 3  | 1 |
| 4  | 7  | 4  | 5 |
| 6  | 14 | 2  | 0 |
| 3  | 12 | 1  | 0 |
| 1  | 3  | 1  | 2 |
| 5  | 14 | 3  | 2 |
| 2  | 0  | 5  | 1 |
| 7  | 14 | 9  | 3 |
| 16 | 26 | 0  | 0 |
| 17 | 17 | 0  | 0 |
| 3  | 0  | 6  | 3 |
| 8  | 9  | 0  | 0 |
| 12 | 0  | 7  | 0 |
| 13 | 15 | 2  | 0 |
| 10 | 13 | 1  | 0 |
| 5  | 10 | 0  | 0 |
| 8  | 15 | 4  | 1 |
| 9  | 12 | 4  | 0 |
| 1  | 8  | 7  | 3 |
| 4  | 1  | 3  | 5 |
| 6  | 3  | 8  | 1 |
| 8  | 12 | 2  | 0 |
| 9  | 7  | 2  | 0 |
| 5  | 17 | 0  | 2 |
| 17 | 6  | 1  | 1 |
| 1  | 1  | 0  | 0 |
| 2  | 11 | 0  | 1 |
| 6  | 3  | 2  | 1 |
| 3  | 6  | 0  | 0 |
| 7  | 7  | 2  | 0 |
| 3  | 2  | 1  | 2 |
| 3  | 2  | 3  | 0 |
| 7  | 6  | 2  | 1 |
| 7  | 4  | 2  | 0 |
| 12 | 6  | 2  | 1 |
| 7  | 10 | 3  | 2 |
| 14 | 4  | 4  | 0 |
| 5  | 8  | 1  | 1 |
| 1  | 0  | 0  | 0 |
| 2  | 1  | 1  | 0 |
| 21 | 5  | 3  | 1 |
| 4  | 7  | 2  | 1 |
| 23 | 2  | 1  | 2 |
| 7  | 9  | 3  | 0 |
| 10 | 4  | 2  | 0 |

|   |    |   |   |
|---|----|---|---|
| 3 | 12 | 0 | 1 |
| 2 | 2  | 0 | 0 |
| 7 | 13 | 0 | 1 |
| 5 | 4  | 1 | 0 |
| 5 | 10 | 1 | 0 |
| 3 | 7  | 1 | 0 |
| 7 | 6  | 2 | 0 |
| 2 | 7  | 4 | 0 |
| 5 | 5  | 2 | 2 |
| 5 | 9  | 1 | 0 |
| 6 | 7  | 0 | 4 |
| 5 | 6  | 3 | 2 |
| 3 | 3  | 0 | 0 |
| 1 | 10 | 0 | 0 |
| 3 | 1  | 4 | 0 |
| 0 | 2  | 0 | 1 |
| 1 | 4  | 0 | 0 |
| 6 | 6  | 2 | 0 |
| 0 | 7  | 1 | 0 |
| 0 | 1  | 1 | 0 |
| 7 | 6  | 1 | 0 |
| 2 | 3  | 0 | 0 |
| 1 | 0  | 5 | 1 |
| 9 | 5  | 2 | 0 |
| 3 | 10 | 1 | 0 |
| 0 | 8  | 1 | 0 |
| 3 | 2  | 1 | 2 |
| 2 | 8  | 2 | 0 |
| 3 | 1  | 0 | 0 |
| 2 | 4  | 0 | 1 |
| 5 | 8  | 0 | 1 |
| 1 | 3  | 1 | 0 |
| 8 | 6  | 0 | 0 |
| 2 | 4  | 1 | 0 |
| 8 | 11 | 2 | 0 |
| 7 | 2  | 2 | 0 |
| 3 | 0  | 2 | 0 |
| 0 | 0  | 0 | 0 |
| 0 | 0  | 0 | 0 |
| 0 | 3  | 1 | 0 |
| 2 | 0  | 0 | 0 |
| 5 | 3  | 0 | 0 |
| 5 | 4  | 2 | 1 |
| 3 | 4  | 1 | 1 |
| 1 | 0  | 0 | 0 |
| 1 | 1  | 0 | 1 |
| 1 | 4  | 1 | 3 |
| 0 | 0  | 0 | 1 |
| 2 | 8  | 3 | 0 |
| 0 | 8  | 1 | 0 |
| 4 | 3  | 0 | 0 |
| 0 | 0  | 0 | 0 |
| 1 | 8  | 0 | 1 |
| 6 | 1  | 4 | 0 |
| 5 | 5  | 1 | 0 |
| 2 | 0  | 1 | 0 |
| 0 | 0  | 0 | 0 |
| 1 | 4  | 1 | 0 |
| 6 | 5  | 0 | 0 |

|    |   |   |   |
|----|---|---|---|
| 1  | 9 | 1 | 1 |
| 0  | 5 | 2 | 0 |
| 5  | 3 | 2 | 1 |
| 5  | 2 | 1 | 0 |
| 2  | 0 | 1 | 2 |
| 2  | 6 | 0 | 0 |
| 3  | 2 | 0 | 0 |
| 0  | 2 | 0 | 0 |
| 3  | 2 | 0 | 0 |
| 4  | 7 | 0 | 1 |
| 10 | 6 | 2 | 0 |
| 7  | 2 | 0 | 0 |
| 1  | 4 | 1 | 0 |
| 0  | 2 | 0 | 0 |
| 0  | 3 | 0 | 1 |
| 1  | 5 | 1 | 1 |
| 1  | 7 | 2 | 0 |
| 6  | 2 | 1 | 0 |
| 1  | 0 | 2 | 0 |
| 2  | 0 | 0 | 0 |
| 5  | 1 | 3 | 0 |
| 1  | 3 | 0 | 0 |
| 2  | 2 | 0 | 1 |
| 3  | 0 | 1 | 1 |
| 1  | 2 | 2 | 0 |
| 2  | 1 | 2 | 1 |
| 0  | 6 | 1 | 1 |
| 2  | 3 | 1 | 1 |
| 2  | 2 | 3 | 0 |
| 1  | 1 | 0 | 1 |
| 0  | 2 | 0 | 2 |
| 1  | 0 | 0 | 0 |
| 2  | 5 | 0 | 2 |
| 0  | 2 | 0 | 0 |
| 6  | 3 | 0 | 0 |
| 0  | 0 | 0 | 1 |
| 2  | 3 | 0 | 0 |
| 1  | 4 | 0 | 1 |
| 1  | 0 | 1 | 0 |
| 3  | 1 | 3 | 0 |
| 1  | 1 | 1 | 1 |
| 0  | 1 | 0 | 1 |
| 3  | 3 | 1 | 0 |
| 0  | 3 | 3 | 0 |
| 1  | 0 | 0 | 0 |
| 0  | 0 | 0 | 1 |
| 0  | 1 | 0 | 0 |
| 0  | 0 | 0 | 0 |
| 0  | 0 | 0 | 0 |
| 5  | 1 | 1 | 0 |
| 3  | 5 | 0 | 0 |
| 1  | 3 | 1 | 0 |
| 3  | 0 | 0 | 0 |
| 0  | 2 | 0 | 1 |
| 1  | 1 | 0 | 0 |
| 1  | 1 | 0 | 0 |
| 0  | 2 | 0 | 1 |
| 1  | 5 | 0 | 0 |
| 2  | 3 | 0 | 0 |

|   |   |   |   |
|---|---|---|---|
| 0 | 0 | 0 | 0 |
| 0 | 3 | 0 | 0 |
| 1 | 1 | 0 | 1 |
| 3 | 5 | 0 | 2 |
| 0 | 3 | 1 | 0 |
| 0 | 2 | 0 | 0 |
| 2 | 8 | 0 | 0 |
| 1 | 2 | 1 | 0 |
| 1 | 2 | 3 | 0 |
| 0 | 5 | 0 | 0 |
| 1 | 1 | 1 | 0 |
| 5 | 0 | 0 | 0 |
| 3 | 4 | 3 | 1 |
| 1 | 6 | 0 | 0 |
| 1 | 6 | 0 | 2 |
| 1 | 2 | 0 | 0 |
| 1 | 4 | 0 | 1 |
| 0 | 1 | 0 | 0 |
| 0 | 0 | 0 | 0 |
| 0 | 0 | 0 | 2 |
| 3 | 0 | 0 | 1 |
| 3 | 0 | 1 | 1 |
| 2 | 2 | 0 | 0 |
| 0 | 3 | 0 | 1 |
| 2 | 1 | 0 | 0 |
| 2 | 3 | 0 | 0 |
| 1 | 2 | 0 | 0 |
| 2 | 1 | 0 | 0 |
| 0 | 2 | 0 | 0 |
| 3 | 3 | 0 | 0 |
| 0 | 1 | 1 | 0 |
| 0 | 2 | 0 | 0 |
| 0 | 2 | 0 | 0 |
| 0 | 2 | 1 | 0 |
| 3 | 1 | 0 | 1 |
| 1 | 8 | 0 | 0 |
| 1 | 2 | 1 | 0 |
| 1 | 0 | 0 | 0 |

|      |      |      |      |
|------|------|------|------|
| 0.92 | 0.85 | 0.10 | 0.04 |
| 3    | 5    | 23   | 27   |
| 1    | 1    | 1    | 1    |

|         |         |        |        |
|---------|---------|--------|--------|
| 92      | 93      | 94     | 95     |
| 27      | 28      | 29     | 30     |
| F_44    | F_9     | G_10   | G_9    |
| CHR_P   | CHR_P   | CHR_P  | CHR_P  |
| 2580829 | 1797912 | 999373 | 336028 |
| CHR_P   | CHR_P   | CHR_P  | CHR_P  |
| 1338069 | 652973  | 273186 | 110265 |
| 219682  | 122940  | 215390 | 26137  |
| 145667  | 125931  | 14419  | 12206  |
| 146527  | 186789  | 94406  | 16565  |
| 146024  | 206210  | 54647  | 23910  |

|       |       |       |       |
|-------|-------|-------|-------|
| 23965 | 18035 | 33221 | 13330 |
| 54262 | 49594 | 58222 | 18835 |
| 2532  | 2158  | 5400  | 2740  |
| 18985 | 20381 | 24629 | 8586  |
| 66948 | 27101 | 30790 | 21344 |
| 51409 | 22088 | 14122 | 13068 |
| 22650 | 38405 | 10022 | 4659  |
| 26369 | 23357 | 12687 | 5899  |
| 18005 | 28494 | 9022  | 4547  |
| 7585  | 4309  | 7370  | 1032  |
| 13509 | 30687 | 2256  | 1015  |
| 8712  | 3110  | 7239  | 1515  |
| 15137 | 10154 | 4100  | 1477  |
| 7645  | 6488  | 7688  | 4923  |
| 19478 | 11759 | 8333  | 2437  |
| 15258 | 13778 | 2678  | 1067  |
| 10258 | 7317  | 5535  | 2832  |
| 36115 | 9239  | 10632 | 2095  |
| 2938  | 3395  | 4481  | 1400  |
| 2871  | 2070  | 6408  | 1265  |
| 13895 | 9703  | 2308  | 978   |
| 7480  | 9474  | 2078  | 1197  |
| 2518  | 1255  | 4845  | 1918  |
| 4053  | 4359  | 3250  | 924   |
| 13764 | 9512  | 6491  | 2815  |
| 4276  | 4603  | 2770  | 869   |
| 3427  | 12922 | 3134  | 588   |
| 2360  | 3220  | 1694  | 817   |
| 1637  | 1446  | 727   | 643   |
| 3737  | 4101  | 2969  | 836   |
| 3723  | 5538  | 3098  | 1501  |
| 3703  | 1877  | 4939  | 1697  |
| 2694  | 1720  | 4607  | 1218  |
| 6980  | 2197  | 1705  | 513   |
| 1265  | 8631  | 643   | 269   |
| 3486  | 7199  | 727   | 289   |
| 5368  | 7016  | 1233  | 671   |
| 3096  | 3313  | 1092  | 508   |
| 842   | 360   | 945   | 324   |
| 1233  | 2024  | 714   | 802   |
| 3552  | 3764  | 949   | 354   |
| 2688  | 2927  | 2751  | 1307  |
| 4563  | 2903  | 881   | 384   |
| 262   | 327   | 261   | 71    |
| 1640  | 981   | 551   | 116   |
| 3186  | 2777  | 666   | 582   |
| 1227  | 1077  | 852   | 255   |
| 1808  | 1598  | 871   | 640   |
| 3430  | 1413  | 900   | 66    |
| 1362  | 3332  | 947   | 355   |
| 210   | 143   | 97    | 88    |
| 751   | 1221  | 787   | 241   |
| 1108  | 2006  | 703   | 130   |
| 2932  | 1472  | 581   | 339   |
| 1721  | 2035  | 991   | 121   |
| 1111  | 1181  | 576   | 315   |
| 916   | 1186  | 720   | 152   |
| 153   | 69    | 254   | 135   |
| 87    | 100   | 35    | 18    |



|      |      |      |     |
|------|------|------|-----|
| 2376 | 1183 | 538  | 156 |
| 492  | 442  | 577  | 193 |
| 347  | 444  | 187  | 479 |
| 266  | 297  | 384  | 67  |
| 563  | 816  | 222  | 80  |
| 1158 | 271  | 1598 | 459 |
| 1184 | 1228 | 272  | 239 |
| 1493 | 1379 | 153  | 72  |
| 285  | 130  | 829  | 122 |
| 1266 | 602  | 377  | 174 |
| 724  | 629  | 336  | 141 |
| 1106 | 1819 | 168  | 157 |
| 804  | 1044 | 896  | 349 |
| 724  | 766  | 699  | 209 |
| 540  | 1301 | 188  | 65  |
| 568  | 462  | 283  | 188 |
| 399  | 606  | 236  | 100 |
| 1007 | 1014 | 207  | 88  |
| 1139 | 683  | 295  | 88  |
| 400  | 579  | 46   | 292 |
| 466  | 549  | 626  | 110 |
| 253  | 747  | 128  | 141 |
| 1113 | 873  | 250  | 74  |
| 84   | 84   | 153  | 52  |
| 626  | 354  | 192  | 83  |
| 403  | 1253 | 261  | 24  |
| 1575 | 1101 | 237  | 84  |
| 15   | 9    | 18   | 13  |
| 442  | 589  | 127  | 25  |
| 168  | 278  | 152  | 48  |
| 77   | 67   | 67   | 39  |
| 136  | 198  | 80   | 26  |
| 866  | 664  | 149  | 24  |
| 653  | 469  | 136  | 52  |
| 639  | 587  | 145  | 102 |
| 68   | 45   | 119  | 30  |
| 279  | 246  | 51   | 87  |
| 324  | 423  | 121  | 51  |
| 368  | 515  | 53   | 77  |
| 184  | 226  | 493  | 95  |
| 198  | 115  | 95   | 68  |
| 129  | 68   | 90   | 27  |
| 429  | 357  | 71   | 42  |
| 289  | 211  | 228  | 89  |
| 95   | 174  | 62   | 23  |
| 67   | 106  | 168  | 62  |
| 214  | 309  | 124  | 31  |
| 432  | 351  | 83   | 33  |
| 230  | 206  | 91   | 75  |
| 102  | 76   | 210  | 30  |
| 136  | 301  | 29   | 14  |
| 164  | 411  | 102  | 49  |
| 156  | 110  | 300  | 21  |
| 148  | 153  | 120  | 54  |
| 148  | 153  | 120  | 54  |
| 79   | 114  | 79   | 73  |
| 87   | 244  | 55   | 94  |
| 394  | 208  | 48   | 22  |
| 101  | 288  | 46   | 20  |

|     |     |     |     |
|-----|-----|-----|-----|
| 168 | 139 | 95  | 19  |
| 18  | 39  | 4   | 0   |
| 202 | 312 | 44  | 17  |
| 106 | 179 | 77  | 68  |
| 207 | 258 | 22  | 12  |
| 197 | 232 | 78  | 16  |
| 286 | 305 | 73  | 1   |
| 111 | 78  | 193 | 131 |
| 162 | 171 | 38  | 26  |
| 44  | 109 | 105 | 47  |
| 130 | 187 | 21  | 21  |
| 66  | 135 | 41  | 28  |
| 189 | 139 | 72  | 53  |
| 63  | 122 | 72  | 32  |
| 74  | 98  | 35  | 29  |
| 48  | 208 | 25  | 22  |
| 70  | 209 | 23  | 14  |
| 90  | 195 | 135 | 18  |
| 107 | 109 | 28  | 26  |
| 35  | 248 | 7   | 4   |
| 75  | 196 | 54  | 5   |
| 10  | 16  | 11  | 5   |
| 109 | 101 | 37  | 15  |
| 152 | 134 | 37  | 6   |
| 59  | 72  | 37  | 11  |
| 116 | 70  | 53  | 21  |
| 74  | 83  | 24  | 28  |
| 91  | 26  | 28  | 24  |
| 17  | 32  | 36  | 16  |
| 47  | 101 | 17  | 18  |
| 114 | 148 | 38  | 12  |
| 7   | 90  | 6   | 2   |
| 126 | 55  | 32  | 29  |
| 54  | 60  | 102 | 12  |
| 35  | 68  | 21  | 52  |
| 67  | 94  | 17  | 16  |
| 49  | 82  | 29  | 11  |
| 10  | 9   | 12  | 1   |
| 80  | 66  | 23  | 26  |
| 76  | 100 | 29  | 20  |
| 62  | 37  | 27  | 5   |
| 72  | 38  | 25  | 6   |
| 74  | 84  | 33  | 8   |
| 88  | 81  | 37  | 10  |
| 34  | 58  | 21  | 171 |
| 8   | 43  | 9   | 4   |
| 61  | 116 | 36  | 10  |
| 22  | 46  | 29  | 14  |
| 75  | 48  | 31  | 23  |
| 146 | 94  | 43  | 23  |
| 75  | 53  | 45  | 14  |
| 44  | 24  | 40  | 5   |
| 60  | 136 | 16  | 4   |
| 83  | 66  | 17  | 33  |
| 67  | 55  | 31  | 13  |
| 52  | 45  | 16  | 20  |
| 43  | 91  | 5   | 13  |
| 118 | 76  | 21  | 16  |
| 27  | 18  | 24  | 6   |

|     |     |    |    |
|-----|-----|----|----|
| 92  | 92  | 7  | 16 |
| 14  | 17  | 49 | 11 |
| 91  | 73  | 16 | 12 |
| 48  | 101 | 13 | 4  |
| 26  | 17  | 23 | 6  |
| 95  | 81  | 4  | 11 |
| 24  | 68  | 18 | 19 |
| 52  | 55  | 38 | 11 |
| 26  | 73  | 2  | 0  |
| 2   | 6   | 29 | 4  |
| 71  | 50  | 15 | 0  |
| 141 | 106 | 26 | 0  |
| 78  | 26  | 41 | 23 |
| 30  | 46  | 40 | 4  |
| 31  | 19  | 16 | 1  |
| 34  | 51  | 23 | 8  |
| 19  | 45  | 10 | 14 |
| 69  | 46  | 8  | 5  |
| 31  | 125 | 28 | 0  |
| 39  | 17  | 7  | 7  |
| 42  | 139 | 17 | 4  |
| 167 | 62  | 33 | 15 |
| 10  | 9   | 10 | 6  |
| 25  | 153 | 9  | 3  |
| 25  | 80  | 29 | 14 |
| 63  | 49  | 23 | 6  |
| 15  | 12  | 23 | 8  |
| 34  | 27  | 15 | 11 |
| 58  | 77  | 8  | 4  |
| 63  | 41  | 13 | 8  |
| 32  | 31  | 7  | 5  |
| 20  | 40  | 13 | 6  |
| 37  | 34  | 13 | 9  |
| 63  | 44  | 27 | 1  |
| 35  | 41  | 14 | 3  |
| 51  | 43  | 18 | 6  |
| 0   | 0   | 0  | 0  |
| 27  | 35  | 25 | 3  |
| 33  | 1   | 40 | 3  |
| 28  | 23  | 9  | 14 |
| 12  | 51  | 4  | 7  |
| 24  | 26  | 10 | 21 |
| 20  | 43  | 5  | 0  |
| 29  | 66  | 4  | 2  |
| 33  | 47  | 7  | 3  |
| 16  | 38  | 4  | 3  |
| 23  | 32  | 9  | 7  |
| 11  | 17  | 6  | 4  |
| 7   | 7   | 21 | 7  |
| 41  | 30  | 10 | 5  |
| 1   | 1   | 2  | 1  |
| 9   | 33  | 4  | 2  |
| 16  | 28  | 6  | 3  |
| 17  | 19  | 9  | 13 |
| 9   | 18  | 4  | 3  |
| 22  | 27  | 9  | 3  |
| 4   | 16  | 5  | 2  |
| 32  | 36  | 5  | 7  |
| 31  | 17  | 6  | 8  |

|    |    |    |   |
|----|----|----|---|
| 9  | 28 | 5  | 7 |
| 7  | 4  | 19 | 1 |
| 16 | 24 | 12 | 2 |
| 16 | 24 | 12 | 2 |
| 31 | 41 | 1  | 1 |
| 18 | 40 | 12 | 2 |
| 13 | 18 | 12 | 5 |
| 15 | 35 | 3  | 4 |
| 18 | 8  | 13 | 3 |
| 9  | 24 | 7  | 2 |
| 76 | 8  | 5  | 6 |
| 9  | 28 | 10 | 2 |
| 9  | 54 | 2  | 0 |
| 20 | 7  | 12 | 3 |
| 14 | 16 | 41 | 1 |
| 2  | 37 | 3  | 2 |
| 6  | 12 | 5  | 2 |
| 1  | 2  | 1  | 0 |
| 7  | 25 | 7  | 4 |
| 14 | 7  | 15 | 3 |
| 24 | 41 | 5  | 1 |
| 21 | 22 | 10 | 4 |
| 12 | 6  | 14 | 3 |
| 26 | 42 | 5  | 4 |
| 9  | 28 | 6  | 0 |
| 11 | 19 | 4  | 7 |
| 8  | 35 | 6  | 4 |
| 0  | 1  | 0  | 2 |
| 8  | 35 | 0  | 2 |
| 15 | 14 | 7  | 3 |
| 11 | 13 | 4  | 0 |
| 16 | 16 | 1  | 3 |
| 11 | 13 | 11 | 1 |
| 0  | 0  | 1  | 0 |
| 13 | 10 | 7  | 2 |
| 5  | 9  | 6  | 2 |
| 0  | 1  | 53 | 0 |
| 10 | 26 | 5  | 2 |
| 8  | 16 | 4  | 0 |
| 9  | 21 | 8  | 1 |
| 9  | 36 | 2  | 3 |
| 15 | 31 | 8  | 2 |
| 14 | 24 | 3  | 0 |
| 8  | 15 | 1  | 5 |
| 12 | 15 | 7  | 2 |
| 12 | 12 | 7  | 0 |
| 5  | 8  | 5  | 2 |
| 13 | 26 | 0  | 6 |
| 3  | 1  | 8  | 2 |
| 4  | 5  | 4  | 1 |
| 5  | 5  | 12 | 5 |
| 10 | 26 | 2  | 1 |
| 12 | 20 | 6  | 6 |
| 2  | 23 | 0  | 0 |
| 15 | 22 | 2  | 3 |
| 8  | 8  | 2  | 2 |
| 10 | 10 | 6  | 2 |
| 3  | 11 | 6  | 5 |
| 12 | 27 | 3  | 1 |

|    |    |    |   |
|----|----|----|---|
| 4  | 3  | 2  | 0 |
| 13 | 31 | 4  | 1 |
| 12 | 34 | 9  | 1 |
| 15 | 11 | 2  | 0 |
| 8  | 14 | 4  | 1 |
| 9  | 15 | 7  | 2 |
| 3  | 28 | 0  | 0 |
| 12 | 13 | 1  | 1 |
| 13 | 14 | 1  | 3 |
| 10 | 13 | 5  | 2 |
| 9  | 1  | 0  | 2 |
| 22 | 15 | 9  | 6 |
| 1  | 1  | 1  | 0 |
| 4  | 0  | 4  | 1 |
| 21 | 4  | 6  | 6 |
| 8  | 4  | 10 | 0 |
| 10 | 8  | 4  | 5 |
| 26 | 23 | 1  | 3 |
| 8  | 11 | 2  | 1 |
| 7  | 27 | 0  | 3 |
| 9  | 23 | 1  | 3 |
| 5  | 3  | 4  | 4 |
| 24 | 13 | 3  | 0 |
| 11 | 17 | 1  | 1 |
| 7  | 23 | 3  | 1 |
| 4  | 14 | 2  | 1 |
| 7  | 4  | 4  | 6 |
| 7  | 16 | 2  | 0 |
| 9  | 3  | 3  | 1 |
| 4  | 7  | 4  | 5 |
| 6  | 14 | 2  | 0 |
| 3  | 12 | 1  | 0 |
| 1  | 3  | 1  | 2 |
| 5  | 14 | 3  | 2 |
| 2  | 0  | 5  | 1 |
| 7  | 14 | 9  | 3 |
| 16 | 26 | 0  | 0 |
| 17 | 17 | 0  | 0 |
| 3  | 0  | 6  | 3 |
| 8  | 9  | 0  | 0 |
| 12 | 0  | 7  | 0 |
| 13 | 15 | 2  | 0 |
| 10 | 13 | 1  | 0 |
| 5  | 10 | 0  | 0 |
| 8  | 15 | 4  | 1 |
| 9  | 12 | 4  | 0 |
| 1  | 8  | 7  | 3 |
| 4  | 1  | 3  | 5 |
| 6  | 3  | 8  | 1 |
| 8  | 12 | 2  | 0 |
| 9  | 7  | 2  | 0 |
| 5  | 17 | 0  | 2 |
| 17 | 6  | 1  | 1 |
| 1  | 1  | 0  | 0 |
| 2  | 11 | 0  | 1 |
| 6  | 3  | 2  | 1 |
| 3  | 6  | 0  | 0 |
| 7  | 7  | 2  | 0 |
| 3  | 2  | 1  | 2 |

|    |    |   |   |
|----|----|---|---|
| 3  | 2  | 3 | 0 |
| 7  | 6  | 2 | 1 |
| 7  | 4  | 2 | 0 |
| 12 | 6  | 2 | 1 |
| 7  | 10 | 3 | 2 |
| 14 | 4  | 4 | 0 |
| 5  | 8  | 1 | 1 |
| 1  | 0  | 0 | 0 |
| 2  | 1  | 1 | 0 |
| 21 | 5  | 3 | 1 |
| 4  | 7  | 2 | 1 |
| 23 | 2  | 1 | 2 |
| 7  | 9  | 3 | 0 |
| 10 | 4  | 2 | 0 |
| 3  | 12 | 0 | 1 |
| 2  | 2  | 0 | 0 |
| 7  | 13 | 0 | 1 |
| 5  | 4  | 1 | 0 |
| 5  | 10 | 1 | 0 |
| 3  | 7  | 1 | 0 |
| 7  | 6  | 2 | 0 |
| 2  | 7  | 4 | 0 |
| 5  | 5  | 2 | 2 |
| 5  | 9  | 1 | 0 |
| 6  | 7  | 0 | 4 |
| 5  | 6  | 3 | 2 |
| 3  | 3  | 0 | 0 |
| 1  | 10 | 0 | 0 |
| 3  | 1  | 4 | 0 |
| 0  | 2  | 0 | 1 |
| 1  | 4  | 0 | 0 |
| 6  | 6  | 2 | 0 |
| 0  | 7  | 1 | 0 |
| 0  | 1  | 1 | 0 |
| 7  | 6  | 1 | 0 |
| 2  | 3  | 0 | 0 |
| 1  | 0  | 5 | 1 |
| 9  | 5  | 2 | 0 |
| 3  | 10 | 1 | 0 |
| 0  | 8  | 1 | 0 |
| 3  | 2  | 1 | 2 |
| 2  | 8  | 2 | 0 |
| 3  | 1  | 0 | 0 |
| 2  | 4  | 0 | 1 |
| 5  | 8  | 0 | 1 |
| 1  | 3  | 1 | 0 |
| 8  | 6  | 0 | 0 |
| 2  | 4  | 1 | 0 |
| 8  | 11 | 2 | 0 |
| 7  | 2  | 2 | 0 |
| 3  | 0  | 2 | 0 |
| 0  | 0  | 0 | 0 |
| 0  | 0  | 0 | 0 |
| 0  | 3  | 1 | 0 |
| 2  | 0  | 0 | 0 |
| 5  | 3  | 0 | 0 |
| 5  | 4  | 2 | 1 |
| 3  | 4  | 1 | 1 |
| 1  | 0  | 0 | 0 |

|    |   |   |   |
|----|---|---|---|
| 1  | 1 | 0 | 1 |
| 1  | 4 | 1 | 3 |
| 0  | 0 | 0 | 1 |
| 2  | 8 | 3 | 0 |
| 0  | 8 | 1 | 0 |
| 4  | 3 | 0 | 0 |
| 0  | 0 | 0 | 0 |
| 1  | 8 | 0 | 1 |
| 6  | 1 | 4 | 0 |
| 5  | 5 | 1 | 0 |
| 2  | 0 | 1 | 0 |
| 0  | 0 | 0 | 0 |
| 1  | 4 | 1 | 0 |
| 6  | 5 | 0 | 0 |
| 1  | 9 | 1 | 1 |
| 0  | 5 | 2 | 0 |
| 5  | 3 | 2 | 1 |
| 5  | 2 | 1 | 0 |
| 2  | 0 | 1 | 2 |
| 2  | 6 | 0 | 0 |
| 3  | 2 | 0 | 0 |
| 0  | 2 | 0 | 0 |
| 3  | 2 | 0 | 0 |
| 4  | 7 | 0 | 1 |
| 10 | 6 | 2 | 0 |
| 7  | 2 | 0 | 0 |
| 1  | 4 | 1 | 0 |
| 0  | 2 | 0 | 0 |
| 0  | 3 | 0 | 1 |
| 1  | 5 | 1 | 1 |
| 1  | 7 | 2 | 0 |
| 6  | 2 | 1 | 0 |
| 1  | 0 | 2 | 0 |
| 2  | 0 | 0 | 0 |
| 5  | 1 | 3 | 0 |
| 1  | 3 | 0 | 0 |
| 2  | 2 | 0 | 1 |
| 3  | 0 | 1 | 1 |
| 1  | 2 | 2 | 0 |
| 2  | 1 | 2 | 1 |
| 0  | 6 | 1 | 1 |
| 2  | 3 | 1 | 1 |
| 2  | 2 | 3 | 0 |
| 1  | 1 | 0 | 1 |
| 0  | 2 | 0 | 2 |
| 1  | 0 | 0 | 0 |
| 2  | 5 | 0 | 2 |
| 0  | 2 | 0 | 0 |
| 6  | 3 | 0 | 0 |
| 0  | 0 | 0 | 1 |
| 2  | 3 | 0 | 0 |
| 1  | 4 | 0 | 1 |
| 1  | 0 | 1 | 0 |
| 3  | 1 | 3 | 0 |
| 1  | 1 | 1 | 1 |
| 0  | 1 | 0 | 1 |
| 3  | 3 | 1 | 0 |
| 0  | 3 | 3 | 0 |
| 1  | 0 | 0 | 0 |

|   |   |   |   |
|---|---|---|---|
| 0 | 0 | 0 | 1 |
| 0 | 1 | 0 | 0 |
| 0 | 0 | 0 | 0 |
| 0 | 0 | 0 | 0 |
| 5 | 1 | 1 | 0 |
| 3 | 5 | 0 | 0 |
| 1 | 3 | 1 | 0 |
| 3 | 0 | 0 | 0 |
| 0 | 2 | 0 | 1 |
| 1 | 1 | 0 | 0 |
| 1 | 1 | 0 | 0 |
| 0 | 2 | 0 | 1 |
| 1 | 5 | 0 | 0 |
| 2 | 3 | 0 | 0 |
| 0 | 0 | 0 | 0 |
| 0 | 3 | 0 | 0 |
| 1 | 1 | 0 | 1 |
| 3 | 5 | 0 | 2 |
| 0 | 3 | 1 | 0 |
| 0 | 2 | 0 | 0 |
| 2 | 8 | 0 | 0 |
| 1 | 2 | 1 | 0 |
| 1 | 2 | 3 | 0 |
| 0 | 5 | 0 | 0 |
| 1 | 1 | 1 | 0 |
| 5 | 0 | 0 | 0 |
| 3 | 4 | 3 | 1 |
| 1 | 6 | 0 | 0 |
| 1 | 6 | 0 | 2 |
| 1 | 2 | 0 | 0 |
| 1 | 4 | 0 | 1 |
| 0 | 1 | 0 | 0 |
| 0 | 0 | 0 | 0 |
| 0 | 0 | 0 | 2 |
| 3 | 0 | 0 | 1 |
| 3 | 0 | 1 | 1 |
| 2 | 2 | 0 | 0 |
| 0 | 3 | 0 | 1 |
| 2 | 1 | 0 | 0 |
| 2 | 3 | 0 | 0 |
| 1 | 2 | 0 | 0 |
| 2 | 1 | 0 | 0 |
| 0 | 2 | 0 | 0 |
| 3 | 3 | 0 | 0 |
| 0 | 1 | 1 | 0 |
| 0 | 2 | 0 | 0 |
| 0 | 2 | 0 | 0 |
| 0 | 2 | 1 | 0 |
| 3 | 1 | 0 | 1 |
| 1 | 8 | 0 | 0 |
| 1 | 2 | 1 | 0 |
| 1 | 0 | 0 | 0 |

|        |        |       |       |
|--------|--------|-------|-------|
| 82077  | 55369  | 31195 | 10366 |
| 243271 | 124837 | 61898 | 20341 |

|       |       |       |       |
|-------|-------|-------|-------|
| 395   | 385   | 421   | 451   |
| CHR_P | CHR_P | CHR_P | CHR_P |
| CHR_P | CHR_P | CHR_P | CHR_P |



|         |         |        |        |
|---------|---------|--------|--------|
| 92      | 93      | 94     | 95     |
| 27      | 28      | 29     | 30     |
| CHR_P   | CHR_P   | CHR_P  | CHR_P  |
| F_44    | F_9     | G_10   | G_9    |
| 2580829 | 1797912 | 999373 | 336028 |
| CHR_P   | CHR_P   | CHR_P  | CHR_P  |
| 16.30   | 11.79   | 8.76   | 10.64  |
| 2.68    | 2.22    | 6.90   | 2.52   |
| 1.77    | 2.27    | 0.46   | 1.18   |
| 1.79    | 3.37    | 3.03   | 1.60   |
| 1.78    | 3.72    | 1.75   | 2.31   |
| 0.29    | 0.33    | 1.06   | 1.29   |
| 0.66    | 0.90    | 1.87   | 1.82   |
| 0.03    | 0.04    | 0.17   | 0.26   |
| 0.23    | 0.37    | 0.79   | 0.83   |
| 0.82    | 0.49    | 0.99   | 2.06   |
| 0.63    | 0.40    | 0.45   | 1.26   |
| 0.28    | 0.69    | 0.32   | 0.45   |
| 0.32    | 0.42    | 0.41   | 0.57   |
| 0.22    | 0.51    | 0.29   | 0.44   |
| 0.09    | 0.08    | 0.24   | 0.10   |
| 0.16    | 0.55    | 0.07   | 0.10   |
| 0.11    | 0.06    | 0.23   | 0.15   |
| 0.18    | 0.18    | 0.13   | 0.14   |
| 0.09    | 0.12    | 0.25   | 0.47   |
| 0.24    | 0.21    | 0.27   | 0.24   |
| 0.19    | 0.25    | 0.09   | 0.10   |
| 0.12    | 0.13    | 0.18   | 0.27   |
| 0.44    | 0.17    | 0.34   | 0.20   |
| 0.04    | 0.06    | 0.14   | 0.14   |
| 0.03    | 0.04    | 0.21   | 0.12   |
| 0.17    | 0.18    | 0.07   | 0.09   |
| 0.09    | 0.17    | 0.07   | 0.12   |
| 0.03    | 0.02    | 0.16   | 0.19   |
| 0.05    | 0.08    | 0.10   | 0.09   |
| 0.17    | 0.17    | 0.21   | 0.27   |
| 0.05    | 0.08    | 0.09   | 0.08   |
| 0.04    | 0.23    | 0.10   | 0.06   |
| 0.03    | 0.06    | 0.05   | 0.08   |
| 0.02    | 0.03    | 0.02   | 0.06   |
| 0.05    | 0.07    | 0.10   | 0.08   |
| 0.05    | 0.10    | 0.10   | 0.14   |
| 0.05    | 0.03    | 0.16   | 0.16   |
| 0.03    | 0.03    | 0.15   | 0.12   |
| 0.09    | 0.04    | 0.05   | 0.05   |
| 0.02    | 0.16    | 0.02   | 0.03   |
| 0.04    | 0.13    | 0.02   | 0.03   |
| 0.07    | 0.13    | 0.04   | 0.06   |
| 0.04    | 0.06    | 0.04   | 0.05   |
| 0.01    | 0.01    | 0.03   | 0.03   |
| 0.02    | 0.04    | 0.02   | 0.08   |
| 0.04    | 0.07    | 0.03   | 0.03   |
| 0.03    | 0.05    | 0.09   | 0.13   |
| 0.06    | 0.05    | 0.03   | 0.04   |
| 0.00    | 0.01    | 0.01   | 0.01   |
| 0.02    | 0.02    | 0.02   | 0.01   |
| 0.04    | 0.05    | 0.02   | 0.06   |
| 0.01    | 0.02    | 0.03   | 0.02   |

|      |      |      |      |
|------|------|------|------|
| 0.02 | 0.03 | 0.03 | 0.06 |
| 0.04 | 0.03 | 0.03 | 0.01 |
| 0.02 | 0.06 | 0.03 | 0.03 |
| 0.00 | 0.00 | 0.00 | 0.01 |
| 0.01 | 0.02 | 0.03 | 0.02 |
| 0.01 | 0.04 | 0.02 | 0.01 |
| 0.04 | 0.03 | 0.02 | 0.03 |
| 0.02 | 0.04 | 0.03 | 0.01 |
| 0.01 | 0.02 | 0.02 | 0.03 |
| 0.01 | 0.02 | 0.02 | 0.01 |
| 0.00 | 0.00 | 0.01 | 0.01 |
| 0.00 | 0.00 | 0.00 | 0.00 |
| 0.03 | 0.02 | 0.02 | 0.02 |
| 0.01 | 0.01 | 0.02 | 0.02 |
| 0.00 | 0.01 | 0.01 | 0.05 |
| 0.00 | 0.01 | 0.01 | 0.01 |
| 0.01 | 0.01 | 0.01 | 0.01 |
| 0.01 | 0.00 | 0.05 | 0.04 |
| 0.01 | 0.02 | 0.01 | 0.02 |
| 0.02 | 0.02 | 0.00 | 0.01 |
| 0.00 | 0.00 | 0.03 | 0.01 |
| 0.02 | 0.01 | 0.01 | 0.02 |
| 0.01 | 0.01 | 0.01 | 0.01 |
| 0.01 | 0.03 | 0.01 | 0.02 |
| 0.01 | 0.02 | 0.03 | 0.03 |
| 0.01 | 0.01 | 0.02 | 0.02 |
| 0.01 | 0.02 | 0.01 | 0.01 |
| 0.01 | 0.01 | 0.01 | 0.02 |
| 0.00 | 0.01 | 0.01 | 0.01 |
| 0.01 | 0.02 | 0.01 | 0.01 |
| 0.01 | 0.01 | 0.01 | 0.01 |
| 0.00 | 0.01 | 0.00 | 0.03 |
| 0.01 | 0.01 | 0.02 | 0.01 |
| 0.00 | 0.01 | 0.00 | 0.01 |
| 0.01 | 0.02 | 0.01 | 0.01 |
| 0.00 | 0.00 | 0.00 | 0.01 |
| 0.01 | 0.01 | 0.01 | 0.01 |
| 0.00 | 0.02 | 0.01 | 0.00 |
| 0.02 | 0.02 | 0.01 | 0.01 |
| 0.00 | 0.00 | 0.00 | 0.00 |
| 0.01 | 0.01 | 0.00 | 0.00 |
| 0.00 | 0.01 | 0.00 | 0.00 |
| 0.00 | 0.00 | 0.00 | 0.00 |
| 0.00 | 0.00 | 0.00 | 0.00 |
| 0.01 | 0.01 | 0.00 | 0.00 |
| 0.01 | 0.01 | 0.00 | 0.01 |
| 0.01 | 0.01 | 0.00 | 0.01 |
| 0.00 | 0.00 | 0.00 | 0.00 |
| 0.00 | 0.00 | 0.00 | 0.01 |
| 0.00 | 0.01 | 0.00 | 0.00 |
| 0.00 | 0.01 | 0.00 | 0.01 |
| 0.00 | 0.00 | 0.02 | 0.01 |
| 0.00 | 0.00 | 0.00 | 0.01 |
| 0.00 | 0.00 | 0.00 | 0.00 |
| 0.01 | 0.01 | 0.00 | 0.00 |
| 0.00 | 0.00 | 0.01 | 0.01 |
| 0.00 | 0.00 | 0.00 | 0.00 |
| 0.00 | 0.00 | 0.01 | 0.01 |
| 0.00 | 0.01 | 0.00 | 0.00 |







|       |       |       |       |     |        |
|-------|-------|-------|-------|-----|--------|
| -0.71 | -0.44 | 0.40  | 0.47  | 42  | 0.36   |
| 0.14  | -0.69 | 0.58  | 3.33  | 3   | 0.07   |
| 0.58  | -0.27 | -0.07 | 2.97  | 66  | 0.55   |
| -1.93 | 1.81  | -1.52 | -0.38 | 60  | 0.51   |
| -0.21 | 0.37  | 0.28  | 1.22  | 16  | 0.17   |
| -1.42 | 0.27  | -1.02 | -0.16 | 96  | 0.74   |
| -0.58 | -0.65 | 0.08  | -0.55 | 2   | 0.06   |
| -0.57 | 1.13  | -0.98 | -0.86 | 64  | 0.54   |
| -0.32 | -0.64 | 0.47  | -0.07 | 32  | 0.29   |
| -0.30 | -0.31 | -0.82 | -0.71 | 4   | 0.07   |
| -0.79 | -0.57 | 0.58  | 2.62  | 105 | 0.83   |
| 0.07  | -0.18 | 0.37  | 0.05  | 73  | 0.59   |
| 0.46  | 1.47  | -1.15 | -0.87 | 69  | 0.58   |
| -0.40 | -0.29 | 0.40  | 1.86  | 19  | 0.20   |
| 3.98  | 0.59  | 2.75  | 1.03  | 59  | 0.46   |
| -0.79 | -0.55 | 0.23  | 0.15  | 95  | 0.74   |
| -0.56 | -0.55 | 0.45  | -0.05 | 83  | 0.64   |
| 1.02  | 1.14  | -0.77 | -0.39 | 45  | 0.37   |
| -0.75 | 0.52  | -1.14 | -0.36 | 127 | 0.95   |
| -0.79 | -0.86 | 0.41  | 0.69  | 20  | 0.20   |
| -1.13 | -0.55 | -0.06 | -0.35 | 37  | 0.34   |
| 1.53  | 1.63  | 2.48  | 3.96  | 21  | 0.23   |
| -0.90 | -0.17 | -0.04 | -0.16 | 112 | 0.88   |
| -1.55 | 2.16  | -0.42 | -1.26 | 77  | 0.62   |
| -0.47 | -0.02 | -0.08 | 0.29  | 72  | 0.59   |
| -0.29 | -0.26 | -0.27 | -0.06 | 102 | 0.81   |
| -1.10 | -0.46 | 0.01  | -0.31 | 51  | 0.41   |
| -0.60 | -0.26 | -0.27 | 0.01  | 55  | 0.43   |
| -0.81 | -0.94 | 0.53  | 0.60  | 128 | 0.96   |
| -0.61 | -0.63 | 0.57  | 0.26  | 121 | 0.92   |
| -0.17 | -0.72 | -0.54 | -0.60 | 1   | 0.0052 |
| -0.68 | 0.45  | -0.64 | -0.59 | 89  | 0.68   |
| -0.68 | 1.11  | -1.08 | -0.98 | 88  | 0.67   |
| -0.10 | 1.75  | -0.88 | -0.12 | 114 | 0.89   |
| -1.07 | -0.18 | -1.18 | -0.62 | 134 | 1.00   |
| -0.68 | -0.77 | -0.18 | -0.15 | 65  | 0.54   |
| -1.01 | -0.55 | -0.84 | 0.32  | 39  | 0.35   |
| -0.23 | 1.56  | -1.16 | -0.89 | 29  | 0.28   |
| -0.32 | 0.49  | 1.91  | 3.44  | 61  | 0.52   |
| 0.20  | 0.09  | -0.71 | -0.42 | 131 | 0.99   |
| -0.29 | -0.19 | -0.11 | -0.16 | 87  | 0.67   |
| -0.23 | -0.29 | -0.29 | -0.43 | 33  | 0.29   |
| 0.19  | 0.80  | -0.76 | 1.12  | 5   | 0.09   |
| -0.57 | -0.44 | -0.21 | -0.28 | 48  | 0.39   |
| -1.06 | -0.53 | -0.60 | 2.02  | 107 | 0.84   |
| 0.67  | -0.19 | -0.01 | -1.20 | 6   | 0.10   |
| -0.46 | 1.95  | 0.30  | 0.51  | 30  | 0.28   |

|       |       |       |       |     |      |
|-------|-------|-------|-------|-----|------|
| -0.28 | -0.28 | -0.26 | -0.04 | 111 | 0.88 |
| -1.52 | -0.48 | -0.23 | -0.39 | 7   | 0.13 |
| -0.87 | 1.01  | -0.12 | -0.95 | 43  | 0.36 |
| 0.38  | -0.30 | -0.89 | 0.16  | 68  | 0.57 |
| -0.53 | -0.11 | -0.24 | -0.77 | 12  | 0.16 |
| -0.89 | -0.26 | -0.49 | 0.47  | 11  | 0.16 |
| -0.90 | -0.05 | 0.09  | -0.61 | 97  | 0.76 |
| -0.58 | -0.63 | -0.09 | 0.29  | 41  | 0.35 |
| -0.25 | -0.21 | -0.24 | -0.22 | 117 | 0.91 |
| -0.03 | -0.46 | -0.70 | -0.83 | 135 | 1.00 |
| -1.01 | -0.82 | 0.19  | 0.20  | 98  | 0.76 |
| -0.58 | -0.30 | -0.45 | 2.50  | 71  | 0.58 |
| -0.71 | -0.50 | 0.19  | -0.39 | 110 | 0.88 |
| -0.67 | 0.23  | -0.64 | -0.57 | 74  | 0.60 |
| -0.25 | -0.37 | 0.23  | 0.14  | 136 | 1.00 |
| -0.50 | 0.04  | -0.91 | 0.11  | 38  | 0.34 |
| -0.22 | 0.44  | -1.53 | -1.33 | 108 | 0.84 |
| -0.62 | -0.72 | 1.54  | 0.16  | 79  | 0.63 |
| 0.20  | -0.39 | -0.23 | 0.38  | 25  | 0.25 |
| -0.28 | 0.04  | -0.03 | 0.32  | 126 | 0.95 |
| -0.31 | 1.29  | -0.97 | -0.17 | 13  | 0.17 |
| -0.57 | 0.53  | 1.73  | 2.33  | 94  | 0.73 |
| -0.33 | -0.20 | 0.03  | -0.03 | 36  | 0.33 |
| -1.01 | 0.54  | -1.06 | -1.04 | 34  | 0.31 |
| -0.74 | -0.60 | -0.53 | 0.31  | 10  | 0.16 |
| -1.21 | -0.01 | -0.68 | -0.27 | 14  | 0.17 |
| 0.00  | 0.86  | -0.81 | -0.55 | 86  | 0.66 |
| -0.25 | -0.39 | -0.65 | -0.74 | 58  | 0.45 |
| -0.28 | -0.02 | -0.44 | 0.80  | 52  | 0.41 |
| -0.38 | 0.34  | 2.05  | 0.45  | 90  | 0.69 |
| -1.01 | 0.84  | -0.83 | 0.86  | 119 | 0.92 |
| 0.08  | 0.52  | -1.03 | -1.21 | 91  | 0.70 |
| -0.84 | -0.76 | -0.20 | -0.18 | 82  | 0.63 |
| -0.20 | -0.52 | -0.59 | -0.09 | 113 | 0.89 |
| -0.86 | 1.34  | -0.43 | -1.18 | 53  | 0.43 |
| 2.90  | 3.08  | -0.08 | 0.05  | 101 | 0.79 |
| -0.28 | -0.29 | -0.21 | -0.08 | 133 | 0.99 |
| -0.33 | 1.06  | -0.68 | -1.12 | 76  | 0.61 |
| -0.75 | -0.15 | -0.18 | -0.23 | 49  | 0.39 |
| -0.52 | -0.47 | -0.29 | 0.02  | 46  | 0.38 |
| -0.86 | -0.48 | -0.68 | -0.69 | 62  | 0.54 |
| 0.63  | 0.98  | -0.75 | -1.33 | 35  | 0.32 |
| 0.39  | 0.59  | -0.98 | -0.73 | 130 | 0.97 |
| 0.11  | 0.78  | -0.64 | 0.60  | 106 | 0.84 |
| -0.62 | -0.63 | 0.06  | -0.15 | 123 | 0.94 |
| -0.43 | -0.24 | -0.73 | 0.44  | 116 | 0.90 |
| -0.42 | 1.07  | -0.45 | -0.03 | 80  | 0.63 |
| -0.65 | 0.37  | -1.25 | -0.03 | 44  | 0.37 |

|       |       |       |       |     |      |
|-------|-------|-------|-------|-----|------|
| -0.51 | -0.36 | 0.62  | 0.07  | 93  | 0.73 |
| -0.73 | -0.84 | -0.52 | 0.65  | 75  | 0.60 |
| -0.53 | -0.63 | -0.15 | -0.23 | 70  | 0.58 |
| -0.06 | 0.31  | -0.95 | -0.41 | 81  | 0.63 |
| -0.46 | -0.41 | 0.10  | 0.28  | 47  | 0.38 |
| -0.83 | -0.20 | -0.56 | -0.49 | 92  | 0.73 |
| -1.03 | -0.62 | 0.70  | 0.92  | 40  | 0.35 |
| -0.58 | 0.47  | -0.09 | -0.44 | 22  | 0.24 |
| 0.28  | 0.83  | -1.03 | -0.77 | 120 | 0.92 |
| -0.44 | -0.13 | -0.40 | 1.03  | 84  | 0.64 |
| -0.83 | -0.77 | 1.39  | -0.16 | 100 | 0.78 |
| -0.86 | 0.55  | -1.13 | -0.98 | 17  | 0.18 |
| -1.22 | 1.12  | -0.68 | -0.05 | 124 | 0.94 |
| -0.82 | -0.77 | 4.11  | -0.74 | 54  | 0.43 |
| -0.59 | -0.18 | 0.27  | 0.85  | 26  | 0.25 |
| -0.59 | -0.18 | 0.27  | 0.85  | 26  | 0.25 |
| -0.94 | -0.64 | -0.50 | 0.75  | 31  | 0.29 |
| -0.90 | 0.30  | -0.65 | 1.98  | 109 | 0.84 |
| 0.88  | 0.24  | -1.12 | -0.76 | 56  | 0.45 |
| -0.52 | 0.92  | -0.43 | -0.26 | 129 | 0.97 |
| -0.29 | -0.09 | 0.15  | -0.39 | 8   | 0.13 |
| -0.31 | -0.14 | -0.35 | -0.39 | 78  | 0.62 |
| -0.60 | 0.77  | -1.06 | -0.96 | 18  | 0.19 |
| -0.75 | 0.21  | -0.17 | 1.86  | 125 | 0.94 |
| -0.22 | 0.89  | -1.15 | -0.92 | 122 | 0.93 |
| -0.31 | 0.32  | -0.28 | -0.61 | 132 | 0.99 |
| -0.03 | 0.43  | -0.28 | -0.79 | 23  | 0.24 |
| -0.19 | -0.17 | 1.83  | 4.53  | 67  | 0.56 |
| -0.18 | 0.69  | -0.77 | 0.24  | 24  | 0.25 |
| -1.15 | -0.14 | 0.84  | 1.67  | 57  | 0.45 |
| -0.48 | 0.22  | -0.84 | -0.31 | 50  | 0.40 |
| -0.40 | 0.54  | -0.11 | 0.69  | 115 | 0.90 |
| 0.00  | 0.19  | 0.01  | 2.46  | 63  | 0.54 |

| 21                                                                                                | 22        | 23            | 24         | 25         | 26         | 27         |
|---------------------------------------------------------------------------------------------------|-----------|---------------|------------|------------|------------|------------|
| 92                                                                                                | 93        | 94            | 95         | 2          | 13         | 71         |
| TCACAGTGAACCC TGAGGTAGGAGG1 ACCACTGACCGTTGAC TACAGTATAG.GCTGACTCCT.CAGTGCAATG TAGCAGCACATAATGGTTT |           |               |            |            |            |            |
| miR-128                                                                                           | let-7e-5p | miR-181a-2-3p | miR-144-3p | miR-345-5p | miR-130a-3 | miR-15a-5p |
| 40544                                                                                             | 37943     | 36605         | 36676      | 32906      | 30537      | 29005      |
| 0.18                                                                                              | -0.64     | -0.46         | -0.20      | 1.35       | -0.48      | -0.56      |
| 0.71                                                                                              | -0.49     | -1.63         | -0.32      | -1.77      | -0.85      | -0.70      |
| -0.79                                                                                             | -0.64     | -0.70         | -0.24      | -0.13      | -0.06      | 0.20       |
| -0.96                                                                                             | -0.60     | -1.06         | -0.25      | 0.62       | -0.43      | -0.46      |
| 1.38                                                                                              | 1.06      | -0.67         | -0.22      | -1.25      | -0.38      | -0.24      |
| 1.46                                                                                              | -0.07     | -0.61         | -0.23      | -0.10      | -0.66      | -0.44      |
| 1.06                                                                                              | 1.44      | 0.20          | -0.28      | 1.28       | -0.46      | -0.40      |
| -0.86                                                                                             | -0.46     | -0.28         | -0.12      | 0.33       | -0.87      | -0.57      |
| 0.03                                                                                              | -0.92     | -1.27         | -0.25      | -1.06      | -0.70      | -0.48      |
| 0.05                                                                                              | -1.03     | -0.45         | -0.19      | -1.20      | -0.65      | -0.13      |
| 0.73                                                                                              | 0.12      | -0.50         | -0.29      | -0.86      | -0.11      | -0.04      |
| -0.47                                                                                             | 0.88      | 0.70          | -0.31      | 1.37       | -0.76      | -0.50      |
| 2.44                                                                                              | -0.64     | -0.40         | 0.13       | 0.40       | 0.74       | 3.99       |
| -1.60                                                                                             | 0.17      | 0.25          | -0.24      | -0.46      | -0.89      | -0.51      |
| -0.26                                                                                             | -0.40     | -0.65         | 0.07       | 0.05       | 0.84       | 0.00       |
| 0.86                                                                                              | -0.45     | -0.11         | -0.04      | 0.27       | 2.30       | 0.97       |
| -1.35                                                                                             | -0.52     | 1.91          | -0.25      | 1.93       | -0.39      | -0.41      |
| 0.75                                                                                              | 0.02      | 0.91          | -0.27      | -0.14      | 3.20       | 0.47       |
| -0.40                                                                                             | -0.87     | 0.81          | -0.30      | -0.63      | -0.39      | -0.14      |
| 1.19                                                                                              | -0.89     | 0.54          | 4.95       | 1.57       | 0.37       | 2.17       |



|       |       |       |       |       |       |       |
|-------|-------|-------|-------|-------|-------|-------|
| 0.27  | -0.54 | 1.52  | -0.10 | -0.92 | -0.07 | -0.32 |
| -0.57 | 2.21  | 2.31  | -0.31 | 0.65  | -0.23 | -0.56 |
| -0.86 | 0.45  | 1.45  | -0.27 | 1.08  | 0.34  | -0.46 |
| -1.29 | -0.30 | 0.47  | -0.23 | -0.05 | -0.55 | -0.50 |
| -0.21 | 3.11  | -0.65 | -0.21 | -1.26 | -0.51 | -0.49 |
| -0.85 | 0.59  | -0.45 | -0.30 | -0.08 | -0.09 | -0.34 |
| -0.65 | -0.56 | -1.18 | 0.27  | -1.02 | 1.73  | 0.46  |
| -0.52 | -0.61 | -1.35 | 9.91  | -0.66 | 0.73  | 3.56  |
| 3.16  | -0.37 | -0.71 | -0.30 | 0.08  | -0.66 | -0.24 |
| 0.02  | -1.21 | 0.63  | -0.27 | -1.27 | -0.73 | -0.43 |
| -0.98 | -0.78 | -0.99 | -0.21 | -1.69 | -1.05 | -0.59 |
| 0.49  | 0.02  | 3.75  | -0.32 | -1.14 | -0.63 | -0.25 |
| 3.52  | 3.63  | -1.49 | -0.14 | -1.64 | -0.02 | -0.07 |
| 1.36  | -0.99 | -1.23 | -0.25 | 1.81  | -0.82 | -0.31 |
| -0.44 | -1.25 | -0.97 | -0.13 | -0.54 | -0.66 | -0.11 |
| 1.67  | -0.45 | 0.85  | -0.20 | 1.27  | -0.53 | -0.48 |
| -1.78 | -0.79 | -1.48 | -0.18 | -1.26 | -1.07 | -0.61 |
| -0.25 | -1.01 | -0.30 | -0.15 | -0.90 | -0.15 | -0.12 |
| 0.02  | -1.09 | 0.06  | 0.18  | -0.90 | 0.52  | 2.56  |
| -0.08 | -0.60 | 1.39  | -0.29 | 0.86  | -0.59 | -0.38 |
| -1.41 | 0.30  | 2.14  | -0.13 | 1.86  | -0.94 | -0.33 |
| -0.04 | 1.80  | 5.08  | 0.23  | 4.53  | -0.61 | -0.42 |
| -1.18 | -0.19 | 0.60  | -0.14 | -0.01 | 0.13  | -0.38 |
| 0.65  | -0.99 | -0.51 | -0.17 | -0.23 | 0.26  | 1.02  |
| -0.99 | 0.02  | 2.08  | -0.29 | -0.77 | -0.69 | -0.58 |
| -1.96 | -0.33 | 0.08  | -0.16 | 0.68  | -1.11 | -0.44 |
| 2.40  | -0.01 | 0.89  | -0.22 | 2.73  | 0.86  | 0.41  |
| 1.10  | -0.41 | 1.10  | -0.24 | 0.90  | -0.04 | -0.31 |
| 0.90  | -0.94 | -0.50 | -0.06 | 2.36  | 1.75  | 0.23  |
| 0.96  | -0.94 | -0.05 | -0.23 | 1.62  | 0.22  | -0.23 |
| 1.05  | -0.93 | 2.81  | -0.18 | 0.28  | 2.98  | 0.16  |
| -0.14 | 0.21  | 0.21  | -0.23 | 0.38  | 0.08  | -0.50 |
| -0.73 | 0.62  | -0.12 | -0.17 | -0.71 | -0.04 | -0.41 |
| 1.81  | -0.26 | 0.14  | -0.26 | 1.01  | 0.61  | 0.09  |
| 1.22  | 0.59  | 1.71  | -0.27 | -0.21 | -0.48 | -0.51 |
| -0.88 | 0.25  | 1.11  | -0.26 | -0.42 | -0.13 | -0.47 |
| 0.34  | 0.17  | 0.06  | -0.24 | -0.90 | 0.50  | -0.22 |
| -0.14 | -0.70 | -0.48 | 8.69  | -0.36 | 1.25  | 2.75  |
| 0.66  | 1.06  | 0.28  | -0.28 | 0.56  | -0.29 | -0.62 |
| 2.90  | 0.70  | -0.07 | -0.24 | -0.68 | 0.47  | -0.29 |
| 2.68  | 0.52  | -0.46 | -0.19 | -0.85 | 0.47  | -0.19 |
| -0.29 | -1.04 | -0.70 | 8.22  | -0.97 | 0.78  | 3.23  |
| -1.03 | -0.42 | 0.22  | -0.06 | -0.41 | -0.62 | -0.52 |
| -0.86 | -0.08 | -0.72 | -0.19 | -0.04 | -0.27 | -0.39 |
| -0.26 | -0.74 | -0.58 | -0.14 | -0.73 | 0.34  | -0.18 |
| -0.98 | 0.02  | 2.73  | -0.24 | -0.21 | -0.63 | -0.25 |
| 1.01  | -1.26 | -1.55 | -0.17 | -0.45 | 1.26  | 0.65  |
| -0.60 | -0.56 | -0.16 | -0.32 | -1.44 | 0.32  | -0.70 |
| 0.88  | 0.65  | -0.08 | -0.17 | -0.76 | -0.49 | -0.36 |
| 3.09  | 0.41  | 0.03  | -0.26 | 1.20  | 0.34  | 0.01  |
| -0.42 | 0.04  | -0.16 | -0.23 | 0.44  | -0.32 | -0.40 |
| 4.46  | -1.12 | 2.38  | -0.21 | -1.22 | -0.24 | 2.99  |
| -0.07 | -0.72 | -0.41 | -0.12 | -0.13 | -0.35 | 0.11  |
| 1.06  | -0.53 | 0.21  | -0.16 | 1.41  | 0.18  | 1.07  |
| -2.12 | -0.59 | 1.49  | 0.07  | 2.97  | -0.90 | -0.66 |
| 1.03  | 0.19  | -0.27 | -0.13 | 0.47  | 1.13  | 0.76  |
| -0.87 | -0.63 | -0.60 | -0.30 | -0.85 | -0.54 | -0.39 |
| -1.01 | 0.72  | 1.47  | -0.27 | -1.43 | -0.60 | -0.51 |
| 0.18  | -0.93 | 0.15  | 0.30  | 0.43  | 2.24  | 1.52  |

|       |       |       |       |       |       |       |
|-------|-------|-------|-------|-------|-------|-------|
| 0.63  | -0.18 | 0.33  | -0.20 | 0.50  | 2.25  | 0.42  |
| -1.25 | -0.23 | -0.65 | -0.22 | 0.74  | -0.05 | -0.29 |
| 0.88  | -0.42 | 0.45  | -0.10 | 2.02  | 0.34  | 0.16  |
| -0.24 | -0.57 | 0.03  | -0.21 | 0.97  | 0.17  | -0.33 |
| 1.18  | -0.93 | 0.42  | 6.69  | 0.64  | 0.73  | 2.83  |
| 0.04  | -1.14 | -1.12 | 14.75 | 0.22  | 0.36  | 4.61  |
| 0.97  | -0.39 | 0.84  | -0.24 | 0.98  | 0.64  | 0.07  |
| 1.15  | -0.53 | 0.17  | -0.19 | 1.86  | 0.37  | -0.08 |
| 0.39  | -0.80 | -2.04 | -0.16 | 0.12  | 0.31  | -0.14 |
| 1.95  | -0.92 | 0.99  | -0.28 | 0.13  | 0.25  | 0.56  |
| 1.45  | 0.37  | 0.62  | -0.22 | 0.07  | 0.37  | -0.17 |
| 0.21  | 0.80  | 1.24  | -0.27 | -0.26 | -0.82 | -0.05 |
| -0.20 | -0.86 | 2.90  | -0.28 | -0.33 | -0.75 | -0.52 |
| -0.52 | 1.34  | 3.08  | -0.29 | 1.06  | -0.15 | -0.47 |
| -0.59 | -0.43 | -0.08 | -0.21 | -0.68 | -0.18 | -0.29 |
| -0.09 | -1.18 | 0.05  | -0.08 | -1.12 | -0.23 | 0.02  |
| 0     | -1    | -1    | 1     | -1    | 1     | 0     |
| 0.00  | 0.00  | 0.00  | 0.00  | 0.00  | 0.00  | 0.00  |
| 1.00  | 1.00  | 1.00  | 1.00  | 1.00  | 1.00  | 1.00  |
| 0.85  | 0.52  | 0.76  | 0.97  | 0.50  | 0.36  | 0.37  |

| 89            | 90           | 91              | 92         | 93         | 94         | 95                  |
|---------------|--------------|-----------------|------------|------------|------------|---------------------|
| TCACAGTGAACCC | TGAGGTAGGAGG | ACCAGTACCGTTGAC | TACAGTATAG | GCTGACTCCT | CAGTGCAATG | TAGCAGCACATAATGGTTT |
| miR-128       | let-7e-5p    | miR-181a-2-3p   | miR-144-3p | miR-345-5p | miR-130a-3 | miR-15a-5p          |
| 40544         | 37943        | 36605           | 36676      | 32906      | 30537      | 29005               |
| 0.18          | -0.64        | -0.46           | -0.20      | 1.35       | -0.48      | -0.56               |
| 0.71          | -0.49        | -1.63           | -0.32      | -1.77      | -0.85      | -0.70               |
| -0.79         | -0.64        | -0.70           | -0.24      | -0.13      | -0.06      | 0.20                |
| -0.96         | -0.60        | -1.06           | -0.25      | 0.62       | -0.43      | -0.46               |
| 1.38          | 1.06         | -0.67           | -0.22      | -1.25      | -0.38      | -0.24               |
| 1.46          | -0.07        | -0.61           | -0.23      | -0.10      | -0.66      | -0.44               |
| 1.06          | 1.44         | 0.20            | -0.28      | 1.28       | -0.46      | -0.40               |
| -0.86         | -0.46        | -0.28           | -0.12      | 0.33       | -0.87      | -0.57               |
| 0.03          | -0.92        | -1.27           | -0.25      | -1.06      | -0.70      | -0.48               |
| 0.05          | -1.03        | -0.45           | -0.19      | -1.20      | -0.65      | -0.13               |
| 0.73          | 0.12         | -0.50           | -0.29      | -0.86      | -0.11      | -0.04               |
| -0.47         | 0.88         | 0.70            | -0.31      | 1.37       | -0.76      | -0.50               |
| 2.44          | -0.64        | -0.40           | 0.13       | 0.40       | 0.74       | 3.99                |
| -1.60         | 0.17         | 0.25            | -0.24      | -0.46      | -0.89      | -0.51               |
| -0.26         | -0.40        | -0.65           | 0.07       | 0.05       | 0.84       | 0.00                |
| 0.86          | -0.45        | -0.11           | -0.04      | 0.27       | 2.30       | 0.97                |
| -1.35         | -0.52        | 1.91            | -0.25      | 1.93       | -0.39      | -0.41               |
| 0.75          | 0.02         | 0.91            | -0.27      | -0.14      | 3.20       | 0.47                |
| -0.40         | -0.87        | 0.81            | -0.30      | -0.63      | -0.39      | -0.14               |
| 1.19          | -0.89        | 0.54            | 4.95       | 1.57       | 0.37       | 2.17                |
| 0.27          | -0.54        | 1.52            | -0.10      | -0.92      | -0.07      | -0.32               |
| -0.57         | 2.21         | 2.31            | -0.31      | 0.65       | -0.23      | -0.56               |
| -0.86         | 0.45         | 1.45            | -0.27      | 1.08       | 0.34       | -0.46               |
| -1.29         | -0.30        | 0.47            | -0.23      | -0.05      | -0.55      | -0.50               |
| -0.21         | 3.11         | -0.65           | -0.21      | -1.26      | -0.51      | -0.49               |
| -0.85         | 0.59         | -0.45           | -0.30      | -0.08      | -0.09      | -0.34               |
| -0.65         | -0.56        | -1.18           | 0.27       | -1.02      | 1.73       | 0.46                |
| -0.52         | -0.61        | -1.35           | 9.91       | -0.66      | 0.73       | 3.56                |

|       |       |       |       |       |       |       |
|-------|-------|-------|-------|-------|-------|-------|
| 3.16  | -0.37 | -0.71 | -0.30 | 0.08  | -0.66 | -0.24 |
| 0.02  | -1.21 | 0.63  | -0.27 | -1.27 | -0.73 | -0.43 |
| -0.98 | -0.78 | -0.99 | -0.21 | -1.69 | -1.05 | -0.59 |
| 0.49  | 0.02  | 3.75  | -0.32 | -1.14 | -0.63 | -0.25 |
| 3.52  | 3.63  | -1.49 | -0.14 | -1.64 | -0.02 | -0.07 |
| 1.36  | -0.99 | -1.23 | -0.25 | 1.81  | -0.82 | -0.31 |
| -0.44 | -1.25 | -0.97 | -0.13 | -0.54 | -0.66 | -0.11 |
| 1.67  | -0.45 | 0.85  | -0.20 | 1.27  | -0.53 | -0.48 |
| -1.78 | -0.79 | -1.48 | -0.18 | -1.26 | -1.07 | -0.61 |
| -0.25 | -1.01 | -0.30 | -0.15 | -0.90 | -0.15 | -0.12 |
| 0.02  | -1.09 | 0.06  | 0.18  | -0.90 | 0.52  | 2.56  |
| -0.08 | -0.60 | 1.39  | -0.29 | 0.86  | -0.59 | -0.38 |
| -1.41 | 0.30  | 2.14  | -0.13 | 1.86  | -0.94 | -0.33 |
| -0.04 | 1.80  | 5.08  | 0.23  | 4.53  | -0.61 | -0.42 |
| -1.18 | -0.19 | 0.60  | -0.14 | -0.01 | 0.13  | -0.38 |
| 0.65  | -0.99 | -0.51 | -0.17 | -0.23 | 0.26  | 1.02  |
| -0.99 | 0.02  | 2.08  | -0.29 | -0.77 | -0.69 | -0.58 |
| -1.96 | -0.33 | 0.08  | -0.16 | 0.68  | -1.11 | -0.44 |
| 2.40  | -0.01 | 0.89  | -0.22 | 2.73  | 0.86  | 0.41  |
| 1.10  | -0.41 | 1.10  | -0.24 | 0.90  | -0.04 | -0.31 |
| 0.90  | -0.94 | -0.50 | -0.06 | 2.36  | 1.75  | 0.23  |
| 0.96  | -0.94 | -0.05 | -0.23 | 1.62  | 0.22  | -0.23 |
| 1.05  | -0.93 | 2.81  | -0.18 | 0.28  | 2.98  | 0.16  |
| -0.14 | 0.21  | 0.21  | -0.23 | 0.38  | 0.08  | -0.50 |
| -0.73 | 0.62  | -0.12 | -0.17 | -0.71 | -0.04 | -0.41 |
| 1.81  | -0.26 | 0.14  | -0.26 | 1.01  | 0.61  | 0.09  |
| 1.22  | 0.59  | 1.71  | -0.27 | -0.21 | -0.48 | -0.51 |
| -0.88 | 0.25  | 1.11  | -0.26 | -0.42 | -0.13 | -0.47 |
| 0.34  | 0.17  | 0.06  | -0.24 | -0.90 | 0.50  | -0.22 |
| -0.14 | -0.70 | -0.48 | 8.69  | -0.36 | 1.25  | 2.75  |
| 0.66  | 1.06  | 0.28  | -0.28 | 0.56  | -0.29 | -0.62 |
| 2.90  | 0.70  | -0.07 | -0.24 | -0.68 | 0.47  | -0.29 |
| 2.68  | 0.52  | -0.46 | -0.19 | -0.85 | 0.47  | -0.19 |
| -0.29 | -1.04 | -0.70 | 8.22  | -0.97 | 0.78  | 3.23  |
| -1.03 | -0.42 | 0.22  | -0.06 | -0.41 | -0.62 | -0.52 |
| -0.86 | -0.08 | -0.72 | -0.19 | -0.04 | -0.27 | -0.39 |
| -0.26 | -0.74 | -0.58 | -0.14 | -0.73 | 0.34  | -0.18 |
| -0.98 | 0.02  | 2.73  | -0.24 | -0.21 | -0.63 | -0.25 |
| 1.01  | -1.26 | -1.55 | -0.17 | -0.45 | 1.26  | 0.65  |
| -0.60 | -0.56 | -0.16 | -0.32 | -1.44 | 0.32  | -0.70 |
| 0.88  | 0.65  | -0.08 | -0.17 | -0.76 | -0.49 | -0.36 |
| 3.09  | 0.41  | 0.03  | -0.26 | 1.20  | 0.34  | 0.01  |
| -0.42 | 0.04  | -0.16 | -0.23 | 0.44  | -0.32 | -0.40 |
| 4.46  | -1.12 | 2.38  | -0.21 | -1.22 | -0.24 | 2.99  |
| -0.07 | -0.72 | -0.41 | -0.12 | -0.13 | -0.35 | 0.11  |
| 1.06  | -0.53 | 0.21  | -0.16 | 1.41  | 0.18  | 1.07  |
| -2.12 | -0.59 | 1.49  | 0.07  | 2.97  | -0.90 | -0.66 |
| 1.03  | 0.19  | -0.27 | -0.13 | 0.47  | 1.13  | 0.76  |
| -0.87 | -0.63 | -0.60 | -0.30 | -0.85 | -0.54 | -0.39 |
| -1.01 | 0.72  | 1.47  | -0.27 | -1.43 | -0.60 | -0.51 |
| 0.18  | -0.93 | 0.15  | 0.30  | 0.43  | 2.24  | 1.52  |
| 0.63  | -0.18 | 0.33  | -0.20 | 0.50  | 2.25  | 0.42  |
| -1.25 | -0.23 | -0.65 | -0.22 | 0.74  | -0.05 | -0.29 |
| 0.88  | -0.42 | 0.45  | -0.10 | 2.02  | 0.34  | 0.16  |
| -0.24 | -0.57 | 0.03  | -0.21 | 0.97  | 0.17  | -0.33 |
| 1.18  | -0.93 | 0.42  | 6.69  | 0.64  | 0.73  | 2.83  |
| 0.04  | -1.14 | -1.12 | 14.75 | 0.22  | 0.36  | 4.61  |
| 0.97  | -0.39 | 0.84  | -0.24 | 0.98  | 0.64  | 0.07  |
| 1.15  | -0.53 | 0.17  | -0.19 | 1.86  | 0.37  | -0.08 |

|       |       |       |       |       |       |       |
|-------|-------|-------|-------|-------|-------|-------|
| 0.39  | -0.80 | -2.04 | -0.16 | 0.12  | 0.31  | -0.14 |
| 1.95  | -0.92 | 0.99  | -0.28 | 0.13  | 0.25  | 0.56  |
| 1.45  | 0.37  | 0.62  | -0.22 | 0.07  | 0.37  | -0.17 |
| 0.21  | 0.80  | 1.24  | -0.27 | -0.26 | -0.82 | -0.05 |
| -0.20 | -0.86 | 2.90  | -0.28 | -0.33 | -0.75 | -0.52 |
| -0.52 | 1.34  | 3.08  | -0.29 | 1.06  | -0.15 | -0.47 |
| -0.59 | -0.43 | -0.08 | -0.21 | -0.68 | -0.18 | -0.29 |
| 0     | -1    | 0     | 0     | -1    | 0     | 0     |

---

| 89            | 90            | 91              | 92          | 93         | 94          | 95                  |
|---------------|---------------|-----------------|-------------|------------|-------------|---------------------|
| 83            | 65            | 112             | 62          | 123        | 130         | 108                 |
| TATTGCACTCGTC | GCCCTGACCTGTC | TCCCCAGGTGTGATT | TGAGACCTCTT | AATATAACAC | TGGGTCTTTG  | TTATCAGAATCTCCAGGGG |
| miR-92b-3p    | miR-4732-3p   | miR-361-3p      | miR-769-5p  | miR-410    | miR-193a-5p | miR-361-5p          |
| 51252         | 93386         | 20718           | 102201      | 14130      | 11818.00    | 23449               |
| -1.14         | -0.14         | 1.41            | 0.08        | 0.77       | -0.63       | -0.40               |
| 3.28          | -0.42         | 0.02            | -0.65       | -0.96      | -0.46       | 1.33                |
| -0.34         | -0.06         | -0.04           | -0.69       | 0.09       | -0.30       | -0.45               |
| -0.71         | 0.11          | -0.51           | -1.15       | -0.66      | -0.16       | -0.76               |
| 1.07          | -1.30         | -0.17           | -0.42       | -0.96      | 1.71        | 4.06                |
| -0.12         | 1.41          | -1.56           | -0.62       | -0.67      | -0.45       | -0.25               |
| -0.56         | -0.02         | 0.50            | -0.13       | -0.07      | 0.04        | -0.57               |
| 1.68          | 2.11          | -0.74           | 0.09        | -0.71      | -0.29       | -0.60               |
| 1.27          | 1.34          | -1.54           | -1.16       | -0.04      | -0.64       | -0.51               |
| -0.11         | 0.03          | -1.36           | -0.45       | -0.68      | -0.71       | -0.21               |
| 0.42          | -0.98         | -0.64           | 0.18        | -0.08      | -0.63       | 0.14                |
| -0.11         | 1.69          | -0.03           | 0.09        | -0.85      | -0.01       | -0.76               |
| -0.93         | -1.19         | -0.82           | 2.44        | -0.71      | -0.44       | 0.10                |
| 0.52          | 0.59          | -0.03           | -0.22       | -0.50      | 0.18        | -0.66               |
| -0.42         | -0.39         | 0.25            | -0.04       | 0.58       | -0.20       | -0.27               |
| -0.58         | -0.45         | 0.04            | 0.74        | 0.61       | -0.44       | -0.06               |
| -0.47         | -0.80         | 0.92            | 0.39        | 0.27       | -0.01       | -0.12               |
| -1.01         | 0.05          | -0.36           | 0.12        | 2.22       | -0.33       | -0.54               |
| -0.77         | -1.28         | 0.41            | 3.16        | 0.14       | -0.53       | 0.22                |
| -0.78         | -0.66         | -0.35           | 1.19        | -0.37      | -0.48       | 0.02                |
| 0.02          | 1.94          | -0.11           | -0.94       | -0.82      | -0.50       | -0.39               |
| -0.23         | -0.25         | 1.91            | 0.33        | 1.00       | 0.55        | -0.53               |
| 0.15          | 0.23          | 2.64            | -0.12       | -0.05      | 0.73        | -0.38               |
| 0.07          | 0.88          | 1.15            | -0.40       | -0.49      | 0.06        | -0.47               |
| 1.34          | -0.36         | -0.19           | -1.44       | -0.77      | 4.30        | 1.75                |
| -0.88         | -1.42         | 0.47            | 0.10        | 0.29       | -0.07       | 0.62                |
| -0.69         | -0.64         | -1.29           | -0.47       | 3.42       | -0.31       | -0.30               |
| -0.92         | -1.17         | -1.54           | -0.76       | 1.28       | -0.60       | -0.61               |
| 0.05          | -0.95         | -0.17           | 0.07        | 0.84       | -0.45       | 0.50                |
| 0.36          | -0.05         | -0.88           | -0.53       | -0.09      | -0.69       | -0.32               |
| 4.70          | 7.78          | -0.16           | -1.44       | -0.54      | -0.75       | -0.20               |
| 0.71          | -0.09         | -0.90           | 0.31        | 0.10       | -0.68       | 0.27                |
| 1.01          | -1.13         | -1.42           | -0.67       | -0.79      | 0.36        | 1.81                |
| -0.61         | -0.09         | 0.37            | 0.43        | -0.09      | 0.89        | -0.52               |
| -0.12         | -0.58         | -0.13           | 0.95        | -0.62      | 0.33        | 0.05                |
| -0.42         | -1.24         | 1.91            | 0.53        | -0.81      | -0.06       | -0.48               |
| 0.70          | 4.89          | -1.43           | -1.57       | -0.84      | -0.66       | -0.90               |
| -1.04         | -1.26         | -0.17           | 1.14        | 1.01       | -0.76       | -0.08               |
| -1.27         | -1.41         | -0.16           | 2.86        | 0.14       | -0.59       | 0.21                |

|       |       |       |       |       |       |       |
|-------|-------|-------|-------|-------|-------|-------|
| -0.39 | -1.23 | 0.66  | 1.21  | -0.47 | -0.26 | -0.09 |
| -0.89 | -1.06 | 1.57  | 1.32  | -0.81 | 0.02  | -0.52 |
| -1.34 | -0.73 | 2.86  | 8.27  | -0.96 | -0.28 | -0.68 |
| -0.11 | -0.71 | 0.39  | -0.57 | -0.39 | 0.12  | -0.26 |
| -0.44 | -0.78 | 0.20  | 1.53  | -0.53 | -0.22 | 0.47  |
| -0.34 | 0.04  | 0.82  | 0.09  | -0.12 | 0.17  | -0.33 |
| -0.68 | -0.45 | 0.74  | -0.27 | -0.72 | 0.43  | -0.77 |
| -0.68 | -1.32 | 0.35  | 0.95  | 1.33  | -0.09 | 1.10  |
| -0.14 | -0.19 | 0.90  | 0.98  | 1.35  | 0.05  | 0.14  |
| -0.34 | 0.17  | -0.05 | 0.07  | -0.51 | -0.27 | -0.22 |
| -0.44 | -0.62 | 2.50  | 1.14  | 1.64  | -0.30 | -0.10 |
| -0.61 | -0.73 | 0.45  | 0.41  | 3.74  | -0.42 | -0.08 |
| 0.30  | -1.05 | 1.07  | -0.89 | 0.80  | 0.08  | -0.14 |
| 0.23  | -0.28 | -0.04 | -1.00 | -0.06 | 0.57  | -0.19 |
| -0.52 | -1.16 | 2.02  | -0.07 | -0.22 | 0.06  | 0.79  |
| 0.04  | 0.47  | 0.24  | -1.02 | -0.55 | 0.26  | -0.51 |
| 0.16  | -0.70 | 0.09  | -0.80 | 0.11  | -0.11 | -0.25 |
| -0.60 | 0.53  | -0.34 | -1.04 | 1.44  | -0.23 | -0.22 |
| -1.31 | -1.25 | -0.72 | 0.42  | -0.43 | -0.47 | -0.44 |
| -0.39 | -0.68 | 1.59  | -0.17 | 0.13  | 1.06  | 0.17  |
| 0.04  | -0.43 | 0.34  | 0.15  | -0.75 | 1.00  | 0.85  |
| -0.32 | -0.93 | 0.81  | -0.50 | -0.32 | 0.61  | 1.61  |
| -0.91 | -0.96 | -1.36 | -0.47 | 1.32  | -0.69 | -0.49 |
| -0.06 | 0.32  | -0.68 | -0.43 | -0.81 | -0.40 | -0.44 |
| -0.20 | 0.19  | -0.68 | -0.87 | 0.04  | -0.38 | -0.54 |
| -0.88 | -0.56 | -1.21 | -0.77 | -0.70 | -0.37 | -0.31 |
| -1.18 | 2.38  | 0.88  | 1.27  | -0.44 | 0.15  | -0.85 |
| -1.17 | -1.19 | -1.29 | -0.81 | 0.15  | -0.77 | -0.41 |
| 1.63  | 0.48  | -0.52 | -1.22 | -0.52 | 0.01  | 0.28  |
| 2.55  | 4.06  | 1.54  | -0.99 | -0.74 | -0.15 | -0.46 |
| 0.51  | 0.04  | 2.17  | -0.01 | -0.06 | 0.44  | -0.17 |
| -0.17 | 1.30  | -0.08 | -0.84 | -0.18 | -0.26 | -0.68 |
| -1.26 | 0.30  | -1.41 | -0.68 | -0.33 | -0.76 | -0.27 |
| -0.43 | -0.10 | -1.68 | -1.01 | -0.57 | -0.57 | -0.56 |
| -0.85 | 0.01  | -0.36 | 0.80  | 0.24  | -0.34 | -0.30 |
| -1.15 | -0.21 | 8.02  | 2.31  | -0.96 | 1.07  | -0.73 |
| -0.70 | -0.25 | 0.26  | 0.22  | 1.14  | -0.22 | -0.56 |
| -0.55 | -1.25 | -0.16 | 1.40  | -0.11 | -0.26 | 0.10  |
| 0.60  | -0.24 | -0.59 | -0.11 | 2.79  | -0.36 | -0.34 |
| -0.71 | -1.36 | -0.22 | 0.88  | 1.44  | -0.20 | 0.54  |
| -0.64 | -1.38 | -0.29 | 0.65  | -0.08 | -0.42 | 0.91  |
| 0.23  | -0.68 | -0.31 | -0.20 | -0.85 | 0.23  | -0.10 |
| -0.44 | -0.92 | -0.03 | -0.18 | 0.52  | -0.40 | 0.55  |
| -0.26 | -0.47 | 0.52  | 0.59  | -0.08 | -0.66 | -0.30 |
| -1.14 | -1.30 | 0.26  | 1.82  | 1.39  | -0.67 | 0.06  |
| -0.91 | -1.03 | -1.34 | -0.22 | 1.01  | -0.63 | -0.52 |
| -0.28 | -0.37 | 0.75  | 0.52  | -0.64 | -0.60 | -0.10 |
| -0.70 | -1.06 | 1.08  | 0.53  | 0.39  | -0.26 | 0.06  |
| -0.22 | -0.09 | -0.26 | -0.77 | -0.75 | -0.18 | -0.08 |
| -0.60 | -0.96 | 0.42  | 1.02  | -0.15 | -0.16 | -0.09 |
| -0.30 | -0.83 | 1.32  | -0.11 | -0.67 | -0.10 | 0.30  |
| -0.83 | -0.30 | -0.62 | 0.80  | 1.10  | -0.12 | -0.44 |
| -0.25 | -0.03 | 0.28  | -0.90 | -0.52 | -0.03 | -0.46 |
| -0.39 | -0.46 | 0.83  | -0.05 | 0.92  | 0.43  | -0.41 |
| -0.65 | -0.70 | -1.03 | 0.09  | -0.43 | -0.28 | 0.10  |
| -0.74 | -0.83 | -0.77 | -0.61 | -0.26 | -0.79 | 0.28  |
| 0.48  | 0.49  | 0.50  | 0.52  | 0.53  | 0.56  | 0.57  |
| 0.66  | 0.73  | 1.00  | 0.38  | 0.76  | 0.46  | 1.00  |













































































































































































1797912 999373 336028

|         |         |         |
|---------|---------|---------|
| 99      | 100     | 101     |
| 30      | 31      | 32      |
| F_9     | G_10    | G_9     |
| CHR_P   | CHR_P   | CHR_P   |
| 3840464 | 4043278 | 1669856 |
| 0.90    | 0.43    | 0.87    |
| F_9     | G_10    | G_9     |
| 2042552 | 3043905 | 1333828 |
| 652973  | 273186  | 110265  |
| 122940  | 215390  | 26137   |
| 125931  | 14419   | 12206   |
| 186789  | 94406   | 16565   |
| 206210  | 54647   | 23910   |
| 18035   | 33221   | 13330   |
| 49594   | 58222   | 18835   |
| 2158    | 5400    | 2740    |
| 20381   | 24629   | 8586    |
| 27101   | 30790   | 21344   |
| 22088   | 14122   | 13068   |
| 38405   | 10022   | 4659    |
| 23357   | 12687   | 5899    |
| 28494   | 9022    | 4547    |
| 4309    | 7370    | 1032    |
| 30687   | 2256    | 1015    |
| 3110    | 7239    | 1515    |
| 10154   | 4100    | 1477    |
| 6488    | 7688    | 4923    |
| 11759   | 8333    | 2437    |
| 13778   | 2678    | 1067    |
| 7317    | 5535    | 2832    |
| 9239    | 10632   | 2095    |
| 3395    | 4481    | 1400    |
| 2070    | 6408    | 1265    |
| 9703    | 2308    | 978     |
| 9474    | 2078    | 1197    |
| 1255    | 4845    | 1918    |
| 4359    | 3250    | 924     |
| 9512    | 6491    | 2815    |
| 4603    | 2770    | 869     |
| 12922   | 3134    | 588     |
| 3220    | 1694    | 817     |
| 1446    | 727     | 643     |
| 4101    | 2969    | 836     |
| 5538    | 3098    | 1501    |
| 1877    | 4939    | 1697    |
| 1720    | 4607    | 1218    |
| 2197    | 1705    | 513     |
| 8631    | 643     | 269     |
| 7199    | 727     | 289     |
| 7016    | 1233    | 671     |
| 3313    | 1092    | 508     |
| 360     | 945     | 324     |
| 2024    | 714     | 802     |

| UC ave with disca | UC ave  | UC sd      |
|-------------------|---------|------------|
| 2863493           | 2583054 | 3181205.95 |
| 466300            | 419901  | 368585.80  |
| 95796             | 86241   | 105619.81  |
| 69946             | 63028   | 56233.40   |
| 85100             | 76611   | 64336.83   |
| 81120             | 73047   | 63402.07   |
| 53412             | 48107   | 74155.61   |
| 42864             | 38603   |            |
| 17282             | 15577   |            |
| 28322             | 25496   |            |
| 30961             | 27946   |            |
| 18817             | 16971   |            |
| 18941             | 17062   |            |
| 14434             | 12998   |            |
| 16876             | 15204   |            |
| 10192             | 9185    |            |
| 11545             | 10395   |            |
| 7170              | 6456    |            |
| 8726              | 7858    |            |
| 8026              | 7228    |            |
| 8456              | 7694    |            |
| 6721              | 6054    |            |
| 6417              | 5779    |            |
| 5348              | 4830    |            |
| 4390              | 3957    |            |
| 4054              | 3652    |            |
| 5128              | 4631    |            |
| 5305              | 4780    |            |
| 4530              | 4219    |            |
| 3844              | 3465    |            |
| 4063              | 3660    |            |
| 3875              | 3490    |            |
| 4500              | 4051    |            |
| 2845              | 2563    |            |
| 4300              | 3873    |            |
| 3453              | 3112    |            |
| 4093              | 3688    |            |
| 3832              | 3462    |            |
| 2734              | 2468    |            |
| 2980              | 2685    |            |
| 3365              | 3030    |            |
| 2595              | 2337    |            |
| 2518              | 2268    |            |
| 2157              | 1943    |            |
| 1536              | 1385    |            |
| 1776              | 1605    |            |

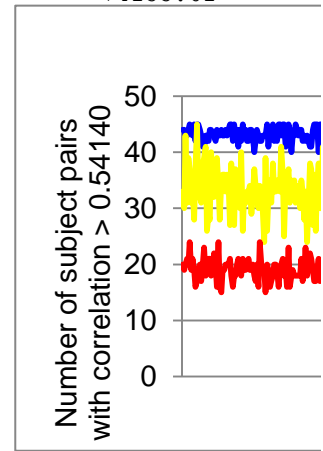

6928.25

|          |
|----------|
| 6397.18  |
| 6128.55  |
| 6049.89  |
| 4813.05  |
| 4740.10  |
| 4768.48  |
| 5069.74  |
| 3276.12  |
| 3163.25  |
| 4029.58  |
| 3603.89  |
| 4722.29  |
| 14035.22 |
| 2993.69  |
| 3376.31  |
| 3654.15  |
| 2665.63  |
| 3020.05  |
| 3933.04  |
| 2469.68  |
| 1995.26  |
| 1668.74  |
| 2268.67  |
| 1229.63  |

|      |      |      |      |      |         |
|------|------|------|------|------|---------|
| 3764 | 949  | 354  | 1827 | 1645 | 1467.17 |
| 2927 | 2751 | 1307 | 1663 | 1498 | 1621.42 |
| 2903 | 881  | 384  | 1986 | 1788 | 1729.09 |
| 327  | 261  | 71   | 547  | 492  | 1429.96 |
| 981  | 551  | 116  | 1547 | 1408 | 2976.66 |
| 2777 | 666  | 582  | 1175 | 1058 | 1060.27 |
| 1077 | 852  | 255  | 1261 | 1137 | 1875.41 |
| 1598 | 871  | 640  | 1308 | 1179 | 1160.26 |
| 1413 | 900  | 66   | 1333 | 1242 | 1470.12 |
| 3332 | 947  | 355  | 1171 | 1055 | 1174.40 |
| 143  | 97   | 88   | 470  | 426  | 1249.72 |
| 1221 | 787  | 241  | 1077 | 971  | 1121.42 |
| 2006 | 703  | 130  | 1030 | 927  | 1073.85 |
| 1472 | 581  | 339  | 1048 | 943  | 844.50  |
| 2035 | 991  | 121  | 1092 | 984  | 918.42  |
| 1181 | 576  | 315  | 916  | 824  | 998.44  |
| 1186 | 720  | 152  | 949  | 855  | 1050.44 |
| 69   | 254  | 135  | 438  | 395  | 749.43  |
| 100  | 35   | 18   | 325  | 292  | 1091.22 |
| 1183 | 538  | 156  | 1072 | 965  | 904.89  |
| 442  | 577  | 193  | 695  | 626  | 809.87  |
| 444  | 187  | 479  | 565  | 509  | 996.69  |
| 297  | 384  | 67   | 477  | 430  | 667.92  |
| 816  | 222  | 80   | 536  | 483  | 713.88  |
| 271  | 1598 | 459  | 800  | 724  | 946.36  |
| 1228 | 272  | 239  | 694  | 625  | 550.03  |
| 1379 | 153  | 72   | 719  | 647  | 592.17  |
| 130  | 829  | 122  | 473  | 426  | 795.89  |
| 602  | 377  | 174  | 615  | 558  | 660.75  |
| 629  | 336  | 141  | 411  | 370  | 428.72  |
| 1819 | 168  | 157  | 601  | 542  | 624.91  |
| 1044 | 896  | 349  | 670  | 605  | 728.77  |
| 766  | 699  | 209  | 453  | 414  | 371.75  |
| 1301 | 188  | 65   | 593  | 534  | 517.00  |
| 462  | 283  | 188  | 499  | 449  | 561.68  |
| 606  | 236  | 100  | 443  | 399  | 427.29  |
| 1014 | 207  | 88   | 493  | 444  | 399.50  |
| 683  | 295  | 88   | 531  | 478  | 465.15  |
| 579  | 46   | 292  | 521  | 470  | 1364.69 |
| 549  | 626  | 110  | 340  | 307  | 404.15  |
| 747  | 128  | 141  | 362  | 327  | 338.37  |
| 873  | 250  | 74   | 456  | 411  | 328.89  |
| 84   | 153  | 52   | 266  | 240  | 383.98  |
| 354  | 192  | 83   | 311  | 280  | 314.77  |
| 1253 | 261  | 24   | 388  | 349  | 374.56  |
| 1101 | 237  | 84   | 309  | 283  | 256.41  |
| 9    | 18   | 13   | 88   | 79   | 265.97  |
| 589  | 127  | 25   | 278  | 250  | 243.47  |
| 278  | 152  | 48   | 247  | 223  | 307.00  |
| 67   | 67   | 39   | 191  | 172  | 384.02  |
| 198  | 80   | 26   | 240  | 216  | 355.39  |
| 664  | 149  | 24   | 282  | 254  | 235.11  |
| 469  | 136  | 52   | 260  | 235  | 210.16  |
| 587  | 145  | 102  | 236  | 212  | 187.33  |
| 45   | 119  | 30   | 188  | 169  | 335.27  |
| 246  | 51   | 87   | 226  | 204  | 250.80  |
| 423  | 121  | 51   | 206  | 186  | 186.64  |
| 515  | 53   | 77   | 247  | 222  | 184.97  |
| 226  | 493  | 95   | 217  | 196  | 202.95  |

|     |     |     |     |     |        |
|-----|-----|-----|-----|-----|--------|
| 115 | 95  | 68  | 190 | 171 | 220.97 |
| 68  | 90  | 27  | 158 | 142 | 236.42 |
| 357 | 71  | 42  | 176 | 159 | 157.54 |
| 211 | 228 | 89  | 182 | 164 | 164.12 |
| 174 | 62  | 23  | 158 | 143 | 243.22 |
| 106 | 168 | 62  | 161 | 145 | 209.37 |
| 309 | 124 | 31  | 181 | 163 | 214.05 |
| 351 | 83  | 33  | 183 | 165 | 165.40 |
| 206 | 91  | 75  | 164 | 148 | 178.53 |
| 76  | 210 | 30  | 149 | 134 | 178.95 |
| 301 | 29  | 14  | 138 | 125 | 127.43 |
| 411 | 102 | 49  | 174 | 156 | 152.17 |
| 110 | 300 | 21  | 141 | 127 | 128.85 |
| 153 | 120 | 54  | 127 | 114 | 156.86 |
| 153 | 120 | 54  | 127 | 114 | 156.86 |
| 114 | 79  | 73  | 139 | 126 | 127.46 |
| 244 | 55  | 94  | 131 | 118 | 104.99 |
| 208 | 48  | 22  | 136 | 123 | 118.10 |
| 288 | 46  | 20  | 116 | 105 | 155.45 |
| 139 | 95  | 19  | 133 | 120 | 169.07 |
| 39  | 4   | 0   | 59  | 53  | 148.94 |
| 312 | 44  | 17  | 129 | 116 | 107.47 |
| 179 | 77  | 68  | 87  | 78  | 65.90  |
| 258 | 22  | 12  | 123 | 110 | 115.92 |
| 232 | 78  | 16  | 106 | 95  | 91.23  |
| 305 | 73  | 1   | 106 | 95  | 101.92 |
| 78  | 193 | 131 | 68  | 62  | 95.71  |
| 171 | 38  | 26  | 94  | 85  | 101.18 |
| 109 | 105 | 47  | 91  | 82  | 91.09  |
| 187 | 21  | 21  | 88  | 80  | 82.21  |
| 135 | 41  | 28  | 72  | 65  | 122.55 |
| 139 | 72  | 53  | 94  | 84  | 87.11  |
| 122 | 72  | 32  | 79  | 72  | 64.15  |
| 98  | 35  | 29  | 85  | 76  | 75.38  |
| 208 | 25  | 22  | 72  | 65  | 70.37  |
| 209 | 23  | 14  | 72  | 64  | 61.35  |
| 195 | 135 | 18  | 85  | 77  | 62.27  |
| 109 | 28  | 26  | 76  | 69  | 81.11  |
| 248 | 7   | 4   | 98  | 89  | 88.43  |
| 196 | 54  | 5   | 63  | 56  | 55.18  |
| 16  | 11  | 5   | 34  | 31  | 70.23  |
| 101 | 37  | 15  | 83  | 74  | 77.19  |
| 134 | 37  | 6   | 67  | 60  | 57.98  |
| 72  | 37  | 11  | 57  | 51  | 64.81  |
| 70  | 53  | 21  | 60  | 54  | 44.55  |
| 83  | 24  | 28  | 57  | 51  | 57.99  |
| 26  | 28  | 24  | 62  | 56  | 88.76  |
| 32  | 36  | 16  | 52  | 47  | 58.69  |
| 101 | 17  | 18  | 50  | 45  | 55.60  |
| 148 | 38  | 12  | 55  | 49  | 46.13  |
| 90  | 6   | 2   | 63  | 58  | 88.23  |
| 55  | 32  | 29  | 57  | 51  | 48.86  |
| 60  | 102 | 12  | 72  | 65  | 86.09  |
| 68  | 21  | 52  | 52  | 47  | 43.66  |
| 94  | 17  | 16  | 52  | 47  | 41.62  |
| 82  | 29  | 11  | 67  | 61  | 65.51  |
| 9   | 12  | 1   | 24  | 22  | 63.75  |
| 66  | 23  | 26  | 48  | 43  | 45.86  |
| 100 | 29  | 20  | 53  | 48  | 44.02  |

|     |    |     |    |    |       |
|-----|----|-----|----|----|-------|
| 37  | 27 | 5   | 50 | 45 | 91.92 |
| 38  | 25 | 6   | 46 | 41 | 73.56 |
| 84  | 33 | 8   | 59 | 53 | 43.21 |
| 81  | 37 | 10  | 44 | 39 | 35.60 |
| 58  | 21 | 171 | 61 | 55 | 89.46 |
| 43  | 9  | 4   | 32 | 29 | 55.79 |
| 116 | 36 | 10  | 54 | 49 | 44.35 |
| 46  | 29 | 14  | 39 | 35 | 53.98 |
| 48  | 31 | 23  | 43 | 39 | 42.64 |
| 94  | 43 | 23  | 54 | 49 | 40.24 |
| 53  | 45 | 14  | 53 | 48 | 70.30 |
| 24  | 40 | 5   | 45 | 40 | 85.17 |
| 136 | 16 | 4   | 48 | 43 | 50.48 |
| 66  | 17 | 33  | 39 | 35 | 44.83 |
| 55  | 31 | 13  | 40 | 36 | 39.41 |
| 45  | 16 | 20  | 43 | 39 | 47.05 |
| 91  | 5  | 13  | 39 | 35 | 36.99 |
| 76  | 21 | 16  | 45 | 40 | 38.53 |
| 18  | 24 | 6   | 34 | 31 | 59.01 |
| 92  | 7  | 16  | 34 | 30 | 34.62 |
| 17  | 49 | 11  | 35 | 31 | 43.98 |
| 73  | 16 | 12  | 40 | 37 | 35.88 |
| 101 | 13 | 4   | 43 | 39 | 32.79 |
| 17  | 23 | 6   | 33 | 29 | 55.70 |
| 81  | 4  | 11  | 35 | 31 | 43.56 |
| 68  | 18 | 19  | 41 | 37 | 44.51 |
| 55  | 38 | 11  | 35 | 32 | 39.85 |
| 73  | 2  | 0   | 15 | 14 | 23.33 |
| 6   | 29 | 4   | 38 | 34 | 78.82 |
| 50  | 15 | 0   | 36 | 32 | 37.50 |
| 106 | 26 | 0   | 42 | 38 | 37.86 |
| 26  | 41 | 23  | 39 | 36 | 33.60 |
| 46  | 40 | 4   | 28 | 25 | 24.33 |
| 19  | 16 | 1   | 26 | 24 | 62.16 |
| 51  | 23 | 8   | 41 | 37 | 35.45 |
| 45  | 10 | 14  | 33 | 29 | 41.15 |
| 46  | 8  | 5   | 35 | 31 | 37.94 |
| 125 | 28 | 0   | 36 | 32 | 36.63 |
| 17  | 7  | 7   | 29 | 27 | 25.78 |
| 139 | 17 | 4   | 36 | 32 | 29.52 |
| 62  | 33 | 15  | 29 | 28 | 29.80 |
| 9   | 10 | 6   | 23 | 21 | 33.65 |
| 153 | 9  | 3   | 26 | 24 | 29.83 |
| 80  | 29 | 14  | 34 | 30 | 30.36 |
| 49  | 23 | 6   | 32 | 29 | 30.23 |
| 12  | 23 | 8   | 34 | 31 | 39.00 |
| 27  | 15 | 11  | 34 | 31 | 28.02 |
| 77  | 8  | 4   | 28 | 25 | 26.28 |
| 41  | 13 | 8   | 29 | 26 | 34.27 |
| 31  | 7  | 5   | 19 | 17 | 25.93 |
| 40  | 13 | 6   | 31 | 28 | 26.81 |
| 34  | 13 | 9   | 27 | 24 | 27.88 |
| 44  | 27 | 1   | 27 | 24 | 24.36 |
| 41  | 14 | 3   | 24 | 21 | 23.89 |
| 43  | 18 | 6   | 24 | 22 | 26.57 |
| 0   | 0  | 0   | 7  | 6  | 18.13 |
| 35  | 25 | 3   | 23 | 20 | 21.01 |
| 1   | 40 | 3   | 25 | 22 | 32.11 |
| 23  | 9  | 14  | 25 | 22 | 22.23 |

|    |    |    |    |    |       |
|----|----|----|----|----|-------|
| 51 | 4  | 7  | 19 | 17 | 18.35 |
| 26 | 10 | 21 | 23 | 21 | 26.09 |
| 43 | 5  | 0  | 17 | 16 | 22.66 |
| 66 | 4  | 2  | 22 | 20 | 16.12 |
| 47 | 7  | 3  | 22 | 19 | 18.63 |
| 38 | 4  | 3  | 23 | 21 | 17.27 |
| 32 | 9  | 7  | 19 | 17 | 15.20 |
| 17 | 6  | 4  | 20 | 18 | 20.56 |
| 7  | 21 | 7  | 17 | 16 | 24.35 |
| 30 | 10 | 5  | 24 | 21 | 22.04 |
| 1  | 2  | 1  | 9  | 9  | 20.31 |
| 33 | 4  | 2  | 19 | 17 | 16.59 |
| 28 | 6  | 3  | 15 | 14 | 16.11 |
| 19 | 9  | 13 | 16 | 15 | 15.63 |
| 18 | 4  | 3  | 13 | 11 | 11.69 |
| 27 | 9  | 3  | 12 | 11 | 23.51 |
| 16 | 5  | 2  | 16 | 15 | 24.66 |
| 36 | 5  | 7  | 16 | 14 | 13.55 |
| 17 | 6  | 8  | 12 | 11 | 14.88 |
| 28 | 5  | 7  | 13 | 12 | 16.87 |
| 4  | 19 | 1  | 14 | 13 | 20.88 |
| 24 | 12 | 2  | 12 | 11 | 11.28 |
| 24 | 12 | 2  | 12 | 11 | 11.28 |
| 41 | 1  | 1  | 14 | 13 | 15.41 |
| 40 | 12 | 2  | 16 | 14 | 14.28 |
| 18 | 12 | 5  | 12 | 11 | 13.15 |
| 35 | 3  | 4  | 12 | 11 | 15.37 |
| 8  | 13 | 3  | 13 | 12 | 12.41 |
| 24 | 7  | 2  | 15 | 14 | 14.98 |
| 8  | 5  | 6  | 11 | 10 | 13.88 |
| 28 | 10 | 2  | 12 | 11 | 12.13 |
| 54 | 2  | 0  | 12 | 11 | 12.72 |
| 7  | 12 | 3  | 14 | 12 | 23.16 |
| 16 | 41 | 1  | 14 | 12 | 19.78 |
| 37 | 3  | 2  | 14 | 13 | 14.56 |
| 12 | 5  | 2  | 15 | 13 | 16.31 |
| 2  | 1  | 0  | 4  | 4  | 12.17 |
| 25 | 7  | 4  | 13 | 12 | 11.82 |
| 7  | 15 | 3  | 15 | 14 | 31.13 |
| 41 | 5  | 1  | 14 | 13 | 15.17 |
| 22 | 10 | 4  | 14 | 12 | 13.51 |
| 6  | 14 | 3  | 14 | 13 | 30.34 |
| 42 | 5  | 4  | 13 | 12 | 13.19 |
| 28 | 6  | 0  | 13 | 12 | 13.47 |
| 19 | 4  | 7  | 13 | 11 | 16.72 |
| 35 | 6  | 4  | 13 | 11 | 9.38  |
| 1  | 0  | 2  | 4  | 4  | 13.29 |
| 35 | 0  | 2  | 12 | 11 | 11.74 |
| 14 | 7  | 3  | 13 | 12 | 12.53 |
| 13 | 4  | 0  | 11 | 10 | 11.04 |
| 16 | 1  | 3  | 9  | 8  | 8.99  |
| 13 | 11 | 1  | 11 | 10 | 11.63 |
| 0  | 1  | 0  | 4  | 4  | 8.36  |
| 10 | 7  | 2  | 10 | 9  | 7.82  |
| 9  | 6  | 2  | 9  | 8  | 14.13 |
| 1  | 53 | 0  | 19 | 18 | 52.85 |
| 26 | 5  | 2  | 12 | 11 | 10.45 |
| 16 | 4  | 0  | 11 | 10 | 13.13 |
| 21 | 8  | 1  | 10 | 9  | 9.67  |

|    |    |   |    |    |       |
|----|----|---|----|----|-------|
| 36 | 2  | 3 | 10 | 9  | 10.12 |
| 31 | 8  | 2 | 10 | 9  | 8.26  |
| 24 | 3  | 0 | 9  | 8  | 10.02 |
| 15 | 1  | 5 | 10 | 9  | 8.31  |
| 15 | 7  | 2 | 10 | 9  | 8.75  |
| 12 | 7  | 0 | 11 | 10 | 9.10  |
| 8  | 5  | 2 | 8  | 8  | 12.97 |
| 26 | 0  | 6 | 9  | 8  | 9.99  |
| 1  | 8  | 2 | 7  | 6  | 15.31 |
| 5  | 4  | 1 | 7  | 6  | 12.35 |
| 5  | 12 | 5 | 8  | 7  | 9.44  |
| 26 | 2  | 1 | 10 | 9  | 9.84  |
| 20 | 6  | 6 | 9  | 8  | 11.48 |
| 23 | 0  | 0 | 12 | 11 | 15.04 |
| 22 | 2  | 3 | 8  | 7  | 8.33  |
| 8  | 2  | 2 | 9  | 8  | 13.14 |
| 10 | 6  | 2 | 12 | 11 | 11.52 |
| 11 | 6  | 5 | 8  | 7  | 9.91  |
| 27 | 3  | 1 | 8  | 7  | 8.20  |
| 3  | 2  | 0 | 5  | 5  | 7.42  |
| 31 | 4  | 1 | 8  | 7  | 9.02  |
| 34 | 9  | 1 | 8  | 7  | 6.79  |
| 11 | 2  | 0 | 8  | 7  | 8.22  |
| 14 | 4  | 1 | 9  | 8  | 7.05  |
| 15 | 7  | 2 | 8  | 7  | 9.43  |
| 28 | 0  | 0 | 9  | 8  | 9.83  |
| 13 | 1  | 1 | 9  | 9  | 9.97  |
| 14 | 1  | 3 | 9  | 8  | 8.51  |
| 13 | 5  | 2 | 6  | 6  | 5.77  |
| 1  | 0  | 2 | 6  | 6  | 7.28  |
| 15 | 9  | 6 | 8  | 7  | 6.57  |
| 1  | 1  | 0 | 6  | 5  | 10.15 |
| 0  | 4  | 1 | 6  | 6  | 11.77 |
| 4  | 6  | 6 | 7  | 6  | 6.12  |
| 4  | 10 | 0 | 7  | 7  | 8.00  |
| 8  | 4  | 5 | 7  | 6  | 7.04  |
| 23 | 1  | 3 | 8  | 7  | 8.94  |
| 11 | 2  | 1 | 7  | 6  | 7.12  |
| 27 | 0  | 3 | 6  | 5  | 6.59  |
| 23 | 1  | 3 | 7  | 6  | 6.67  |
| 3  | 4  | 4 | 6  | 6  | 10.93 |
| 13 | 3  | 0 | 7  | 6  | 7.21  |
| 17 | 1  | 1 | 6  | 5  | 6.38  |
| 23 | 3  | 1 | 6  | 6  | 6.66  |
| 14 | 2  | 1 | 5  | 5  | 5.61  |
| 4  | 4  | 6 | 6  | 6  | 8.00  |
| 16 | 2  | 0 | 7  | 6  | 5.21  |
| 3  | 3  | 1 | 6  | 5  | 5.92  |
| 7  | 4  | 5 | 6  | 5  | 4.82  |
| 14 | 2  | 0 | 6  | 5  | 5.25  |
| 12 | 1  | 0 | 7  | 6  | 6.95  |
| 3  | 1  | 2 | 4  | 3  | 7.27  |
| 14 | 3  | 2 | 5  | 5  | 5.72  |
| 0  | 5  | 1 | 4  | 4  | 5.47  |
| 14 | 9  | 3 | 5  | 5  | 6.54  |
| 26 | 0  | 0 | 5  | 5  | 5.73  |
| 17 | 0  | 0 | 6  | 5  | 5.27  |
| 0  | 6  | 3 | 3  | 3  | 6.41  |
| 9  | 0  | 0 | 6  | 6  | 6.43  |

|    |   |   |   |   |       |
|----|---|---|---|---|-------|
| 0  | 7 | 0 | 7 | 7 | 5.33  |
| 15 | 2 | 0 | 7 | 6 | 5.82  |
| 13 | 1 | 0 | 5 | 5 | 5.84  |
| 10 | 0 | 0 | 5 | 5 | 4.95  |
| 15 | 4 | 1 | 5 | 5 | 4.84  |
| 12 | 4 | 0 | 6 | 6 | 7.13  |
| 8  | 7 | 3 | 6 | 6 | 5.89  |
| 1  | 3 | 5 | 3 | 2 | 4.57  |
| 3  | 8 | 1 | 5 | 4 | 6.32  |
| 12 | 2 | 0 | 4 | 4 | 4.08  |
| 7  | 2 | 0 | 5 | 4 | 4.11  |
| 17 | 0 | 2 | 4 | 4 | 5.35  |
| 6  | 1 | 1 | 5 | 5 | 5.37  |
| 1  | 0 | 0 | 5 | 4 | 13.57 |
| 11 | 0 | 1 | 4 | 4 | 4.12  |
| 3  | 2 | 1 | 5 | 4 | 5.65  |
| 6  | 0 | 0 | 3 | 3 | 4.46  |
| 7  | 2 | 0 | 4 | 4 | 4.56  |
| 2  | 1 | 2 | 3 | 3 | 5.94  |
| 2  | 3 | 0 | 4 | 4 | 4.28  |
| 6  | 2 | 1 | 3 | 3 | 5.61  |
| 4  | 2 | 0 | 4 | 4 | 6.11  |
| 6  | 2 | 1 | 3 | 3 | 2.36  |
| 10 | 3 | 2 | 4 | 4 | 3.49  |
| 4  | 4 | 0 | 4 | 4 | 4.64  |
| 8  | 1 | 1 | 4 | 3 | 3.53  |
| 0  | 0 | 0 | 3 | 2 | 5.44  |
| 1  | 1 | 0 | 4 | 3 | 10.92 |
| 5  | 3 | 1 | 4 | 4 | 4.95  |
| 7  | 2 | 1 | 3 | 3 | 3.37  |
| 2  | 1 | 2 | 2 | 2 | 1.80  |
| 9  | 3 | 0 | 3 | 3 | 3.52  |
| 4  | 2 | 0 | 2 | 2 | 2.78  |
| 12 | 0 | 1 | 4 | 4 | 4.15  |
| 2  | 0 | 0 | 2 | 2 | 3.43  |
| 13 | 0 | 1 | 3 | 3 | 3.93  |
| 4  | 1 | 0 | 3 | 3 | 4.20  |
| 10 | 1 | 0 | 3 | 3 | 3.52  |
| 7  | 1 | 0 | 4 | 3 | 3.38  |
| 6  | 2 | 0 | 3 | 3 | 3.31  |
| 7  | 4 | 0 | 4 | 3 | 5.77  |
| 5  | 2 | 2 | 2 | 2 | 2.23  |
| 9  | 1 | 0 | 3 | 3 | 3.57  |
| 7  | 0 | 4 | 3 | 2 | 2.75  |
| 6  | 3 | 2 | 3 | 3 | 2.34  |
| 3  | 0 | 0 | 3 | 3 | 3.57  |
| 10 | 0 | 0 | 2 | 2 | 2.68  |
| 1  | 4 | 0 | 3 | 3 | 3.30  |
| 2  | 0 | 1 | 2 | 2 | 3.74  |
| 4  | 0 | 0 | 2 | 2 | 3.99  |
| 6  | 2 | 0 | 3 | 3 | 2.73  |
| 7  | 1 | 0 | 2 | 2 | 1.95  |
| 1  | 1 | 0 | 3 | 2 | 4.66  |
| 6  | 1 | 0 | 2 | 2 | 2.55  |
| 3  | 0 | 0 | 3 | 2 | 2.71  |
| 0  | 5 | 1 | 3 | 3 | 3.94  |
| 5  | 2 | 0 | 3 | 2 | 3.20  |
| 10 | 1 | 0 | 3 | 3 | 2.82  |
| 8  | 1 | 0 | 3 | 3 | 5.00  |



|    |   |   |   |   |      |
|----|---|---|---|---|------|
| 2  | 1 | 2 | 2 | 2 | 2.91 |
| 8  | 2 | 0 | 2 | 2 | 2.46 |
| 1  | 0 | 0 | 3 | 2 | 4.70 |
| 4  | 0 | 1 | 1 | 1 | 2.44 |
| 8  | 0 | 1 | 2 | 2 | 2.17 |
| 3  | 1 | 0 | 3 | 2 | 3.18 |
| 6  | 0 | 0 | 3 | 3 | 3.49 |
| 4  | 1 | 0 | 2 | 2 | 4.23 |
| 11 | 2 | 0 | 2 | 2 | 2.65 |
| 2  | 2 | 0 | 2 | 2 | 2.05 |
| 0  | 2 | 0 | 2 | 2 | 4.53 |
| 0  | 0 | 0 | 1 | 1 | 3.32 |
| 0  | 0 | 0 | 1 | 1 | 2.55 |
| 3  | 1 | 0 | 2 | 2 | 3.47 |
| 0  | 0 | 0 | 3 | 3 | 3.06 |
| 3  | 0 | 0 | 2 | 2 | 2.57 |
| 4  | 2 | 1 | 2 | 2 | 2.05 |
| 4  | 1 | 1 | 2 | 2 | 2.02 |
| 0  | 0 | 0 | 1 | 1 | 3.37 |
| 1  | 0 | 1 | 1 | 1 | 1.18 |
| 4  | 1 | 3 | 2 | 1 | 1.48 |
| 0  | 0 | 1 | 2 | 2 | 4.93 |
| 8  | 3 | 0 | 3 | 2 | 3.67 |
| 8  | 1 | 0 | 2 | 2 | 2.18 |
| 3  | 0 | 0 | 3 | 2 | 2.64 |
| 0  | 0 | 0 | 2 | 2 | 4.58 |
| 8  | 0 | 1 | 2 | 2 | 2.71 |
| 1  | 4 | 0 | 2 | 2 | 2.96 |
| 5  | 1 | 0 | 2 | 2 | 2.28 |
| 0  | 1 | 0 | 2 | 2 | 2.28 |
| 0  | 0 | 0 | 1 | 1 | 3.08 |
| 4  | 1 | 0 | 3 | 2 | 3.11 |
| 5  | 0 | 0 | 3 | 2 | 2.31 |
| 9  | 1 | 1 | 3 | 2 | 3.23 |
| 5  | 2 | 0 | 2 | 2 | 3.59 |
| 3  | 2 | 1 | 2 | 2 | 3.18 |
| 2  | 1 | 0 | 2 | 2 | 1.78 |
| 0  | 1 | 2 | 2 | 2 | 1.95 |
| 6  | 0 | 0 | 2 | 2 | 2.44 |
| 2  | 0 | 0 | 2 | 2 | 2.05 |
| 2  | 0 | 0 | 1 | 1 | 1.78 |
| 2  | 0 | 0 | 1 | 1 | 1.35 |
| 7  | 0 | 1 | 2 | 2 | 1.70 |
| 6  | 2 | 0 | 2 | 2 | 2.75 |
| 2  | 0 | 0 | 2 | 2 | 2.11 |
| 4  | 1 | 0 | 1 | 1 | 1.06 |
| 2  | 0 | 0 | 2 | 2 | 4.69 |
| 3  | 0 | 1 | 2 | 2 | 1.92 |
| 5  | 1 | 1 | 2 | 2 | 1.82 |
| 7  | 2 | 0 | 2 | 2 | 1.87 |
| 2  | 1 | 0 | 2 | 2 | 2.36 |
| 0  | 2 | 0 | 2 | 1 | 2.39 |
| 0  | 0 | 0 | 2 | 2 | 2.95 |
| 1  | 3 | 0 | 1 | 1 | 2.64 |
| 3  | 0 | 0 | 2 | 1 | 2.30 |
| 2  | 0 | 1 | 1 | 1 | 1.66 |
| 0  | 1 | 1 | 2 | 2 | 2.41 |
| 2  | 2 | 0 | 2 | 2 | 2.42 |
| 1  | 2 | 1 | 2 | 2 | 2.44 |

|   |   |   |   |   |      |
|---|---|---|---|---|------|
| 6 | 1 | 1 | 1 | 1 | 1.63 |
| 3 | 1 | 1 | 2 | 2 | 1.80 |
| 2 | 3 | 0 | 2 | 2 | 1.59 |
| 1 | 0 | 1 | 1 | 1 | 1.52 |
| 2 | 0 | 2 | 2 | 2 | 2.97 |
| 0 | 0 | 0 | 1 | 1 | 2.97 |
| 5 | 0 | 2 | 1 | 1 | 1.63 |
| 2 | 0 | 0 | 1 | 1 | 2.41 |
| 3 | 0 | 0 | 1 | 1 | 1.94 |
| 0 | 0 | 1 | 1 | 1 | 1.46 |
| 3 | 0 | 0 | 1 | 1 | 1.87 |
| 4 | 0 | 1 | 1 | 1 | 2.10 |
| 0 | 1 | 0 | 1 | 1 | 2.76 |
| 1 | 3 | 0 | 1 | 1 | 1.62 |
| 1 | 1 | 1 | 1 | 1 | 1.65 |
| 1 | 0 | 1 | 1 | 1 | 1.22 |
| 3 | 1 | 0 | 1 | 1 | 1.51 |
| 3 | 3 | 0 | 1 | 1 | 1.83 |
| 0 | 0 | 0 | 1 | 1 | 2.77 |
| 0 | 0 | 1 | 1 | 1 | 1.67 |
| 1 | 0 | 0 | 1 | 1 | 1.64 |
| 0 | 0 | 0 | 1 | 1 | 1.41 |
| 0 | 0 | 0 | 1 | 1 | 2.66 |
| 1 | 1 | 0 | 2 | 1 | 1.36 |
| 5 | 0 | 0 | 1 | 1 | 1.81 |
| 3 | 1 | 0 | 1 | 1 | 1.38 |
| 0 | 0 | 0 | 2 | 2 | 2.39 |
| 2 | 0 | 1 | 1 | 1 | 1.53 |
| 1 | 0 | 0 | 1 | 1 | 1.68 |
| 1 | 0 | 0 | 1 | 1 | 1.18 |
| 2 | 0 | 1 | 1 | 0 | 1.22 |
| 5 | 0 | 0 | 1 | 1 | 1.37 |
| 3 | 0 | 0 | 1 | 1 | 1.32 |
| 0 | 0 | 0 | 1 | 1 | 1.33 |
| 3 | 0 | 0 | 1 | 1 | 1.10 |
| 1 | 0 | 1 | 1 | 1 | 1.31 |
| 5 | 0 | 2 | 1 | 1 | 1.58 |
| 3 | 1 | 0 | 1 | 1 | 1.74 |
| 2 | 0 | 0 | 1 | 1 | 1.63 |
| 8 | 0 | 0 | 2 | 2 | 1.90 |
| 2 | 1 | 0 | 1 | 1 | 1.35 |
| 2 | 3 | 0 | 1 | 1 | 1.78 |
| 5 | 0 | 0 | 1 | 1 | 1.54 |
| 1 | 1 | 0 | 1 | 1 | 1.39 |
| 0 | 0 | 0 | 1 | 1 | 1.61 |
| 4 | 3 | 1 | 1 | 1 | 1.76 |
| 6 | 0 | 0 | 1 | 1 | 1.85 |
| 6 | 0 | 2 | 1 | 1 | 2.12 |
| 2 | 0 | 0 | 1 | 1 | 1.37 |
| 4 | 0 | 1 | 1 | 1 | 1.10 |
| 1 | 0 | 0 | 1 | 1 | 1.72 |
| 0 | 0 | 0 | 1 | 0 | 0.68 |
| 0 | 0 | 2 | 1 | 1 | 0.97 |
| 0 | 0 | 1 | 1 | 1 | 0.82 |
| 0 | 1 | 1 | 1 | 1 | 1.10 |
| 2 | 0 | 0 | 1 | 1 | 1.52 |
| 3 | 0 | 1 | 1 | 1 | 1.15 |
| 1 | 0 | 0 | 1 | 1 | 1.07 |
| 3 | 0 | 0 | 1 | 1 | 1.49 |

|         |         |         |   |    |      |
|---------|---------|---------|---|----|------|
| 2       | 0       | 0       | 1 | 1  | 1.68 |
| 1       | 0       | 0       | 1 | 1  | 1.20 |
| 2       | 0       | 0       | 1 | 1  | 1.89 |
| 3       | 0       | 0       | 1 | 1  | 1.42 |
| 1       | 1       | 0       | 1 | 1  | 1.07 |
| 2       | 0       | 0       | 1 | 1  | 1.55 |
| 2       | 0       | 0       | 1 | 1  | 1.41 |
| 2       | 1       | 0       | 1 | 1  | 2.13 |
| 1       | 0       | 1       | 1 | 1  | 1.03 |
| 8       | 0       | 0       | 1 | 1  | 2.58 |
| 2       | 1       | 0       | 1 | 1  | 0.94 |
| 0       | 0       | 0       | 1 | 1  | 1.34 |
| 0       | 0       | 0       |   |    |      |
| F_9     | G_10    | G_9     |   |    |      |
| CHR_P   | CHR_P   | CHR_P   |   |    |      |
| 2042552 | 3043905 | 1333828 |   |    |      |
| 17      | 24      | 25      |   | 21 | 4.75 |
| -0.89   | 0.50    | 0.80    |   |    |      |

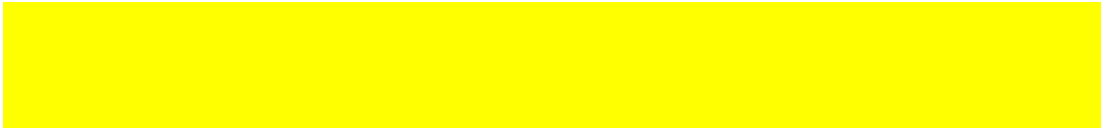

| UC ave | UC sd  | sd/ave |
|--------|--------|--------|
| 466300 | 359409 | 0.77   |
| 95796  | 107213 | 1.12   |
| 69946  | 55047  | 0.79   |
| 85100  | 62197  | 0.73   |
| 81120  | 61700  | 0.76   |
| 53412  | 76428  | 1.43   |
| 42864  | 41027  | 0.96   |
| 17282  | 34968  | 2.02   |
| 28322  | 36116  | 1.28   |
| 30961  | 31822  | 1.03   |
| 18817  | 18275  | 0.97   |
| 18941  | 13984  | 0.74   |
| 14434  | 14370  | 1.00   |
| 16876  | 12748  | 0.76   |
| 10192  | 17544  | 1.72   |
| 11545  | 10903  | 0.94   |
| 7170   | 11995  | 1.67   |
| 8726   | 9877   | 1.13   |
| 8026   | 9388   | 1.17   |

|      |       |      |
|------|-------|------|
| 8456 | 7531  | 0.89 |
| 6721 | 6994  | 1.04 |
| 6417 | 6435  | 1.00 |
| 5348 | 6254  | 1.17 |
| 4390 | 6235  | 1.42 |
| 4054 | 4916  | 1.21 |
| 5128 | 4743  | 0.92 |
| 5305 | 4743  | 0.89 |
| 4530 | 5233  | 1.16 |
| 3844 | 3237  | 0.84 |
| 4063 | 3078  | 0.76 |
| 3875 | 4071  | 1.05 |
| 4500 | 3521  | 0.78 |
| 2845 | 4904  | 1.72 |
| 4300 | 14759 | 3.43 |
| 3453 | 2965  | 0.86 |
| 4093 | 3319  | 0.81 |
| 3832 | 3670  | 0.96 |
| 2734 | 2682  | 0.98 |
| 2980 | 3044  | 1.02 |
| 3365 | 4011  | 1.19 |
| 2595 | 2473  | 0.95 |
| 2518 | 1947  | 0.77 |
| 2157 | 1622  | 0.75 |
| 1536 | 2347  | 1.53 |
| 1776 | 1176  | 0.66 |
| 1827 | 1435  | 0.79 |
| 1663 | 1628  | 0.98 |
| 1986 | 1712  | 0.86 |
| 547  | 1500  | 2.74 |
| 1547 | 3111  | 2.01 |
| 1175 | 1055  | 0.90 |
| 1261 | 1940  | 1.54 |
| 1308 | 1153  | 0.88 |
| 1333 | 1516  | 1.14 |
| 1171 | 1183  | 1.01 |
| 470  | 1312  | 2.79 |
| 1077 | 1134  | 1.05 |
| 1030 | 1085  | 1.05 |
| 1048 | 826   | 0.79 |
| 1092 | 905   | 0.83 |
| 916  | 1013  | 1.11 |
| 949  | 1067  | 1.12 |
| 438  | 779   | 1.78 |
| 325  | 1148  | 3.54 |
| 1072 | 891   | 0.83 |
| 695  | 826   | 1.19 |
| 565  | 1037  | 1.84 |
| 477  | 689   | 1.44 |
| 536  | 734   | 1.37 |
| 800  | 968   | 1.21 |
| 694  | 537   | 0.77 |
| 719  | 581   | 0.81 |
| 473  | 827   | 1.75 |
| 615  | 673   | 1.09 |
| 411  | 433   | 1.05 |
| 601  | 631   | 1.05 |
| 670  | 741   | 1.11 |
| 453  | 371   | 0.82 |

|     |      |      |
|-----|------|------|
| 593 | 512  | 0.86 |
| 499 | 571  | 1.15 |
| 443 | 429  | 0.97 |
| 493 | 391  | 0.79 |
| 531 | 461  | 0.87 |
| 521 | 1432 | 2.75 |
| 340 | 413  | 1.21 |
| 362 | 338  | 0.93 |
| 456 | 315  | 0.69 |
| 266 | 397  | 1.49 |
| 311 | 317  | 1.02 |
| 388 | 375  | 0.97 |
| 309 | 257  | 0.83 |
| 88  | 279  | 3.17 |
| 278 | 241  | 0.87 |
| 247 | 314  | 1.27 |
| 191 | 401  | 2.10 |
| 240 | 367  | 1.53 |
| 282 | 231  | 0.82 |
| 260 | 206  | 0.79 |
| 236 | 183  | 0.78 |
| 188 | 349  | 1.86 |
| 226 | 255  | 1.13 |
| 206 | 186  | 0.90 |
| 247 | 179  | 0.72 |
| 217 | 203  | 0.93 |
| 190 | 225  | 1.19 |
| 158 | 245  | 1.55 |
| 176 | 157  | 0.89 |
| 182 | 164  | 0.90 |
| 158 | 252  | 1.59 |
| 161 | 215  | 1.33 |
| 181 | 219  | 1.21 |
| 183 | 164  | 0.90 |
| 164 | 181  | 1.11 |
| 149 | 183  | 1.23 |
| 138 | 127  | 0.92 |
| 174 | 151  | 0.87 |
| 141 | 129  | 0.92 |
| 127 | 161  | 1.27 |
| 127 | 161  | 1.27 |
| 139 | 127  | 0.91 |
| 131 | 103  | 0.78 |
| 136 | 117  | 0.86 |
| 116 | 160  | 1.38 |
| 133 | 174  | 1.30 |
| 59  | 156  | 2.67 |
| 129 | 106  | 0.82 |
| 87  | 64   | 0.74 |
| 123 | 116  | 0.94 |
| 106 | 90   | 0.86 |
| 106 | 102  | 0.97 |
| 68  | 99   | 1.45 |
| 94  | 103  | 1.09 |
| 91  | 92   | 1.02 |
| 88  | 82   | 0.93 |
| 72  | 127  | 1.76 |
| 94  | 87   | 0.93 |
| 79  | 64   | 0.81 |

|    |    |      |
|----|----|------|
| 85 | 75 | 0.88 |
| 72 | 71 | 0.98 |
| 72 | 61 | 0.85 |
| 85 | 60 | 0.71 |
| 76 | 82 | 1.07 |
| 98 | 88 | 0.90 |
| 63 | 55 | 0.87 |
| 34 | 73 | 2.16 |
| 83 | 77 | 0.93 |
| 67 | 57 | 0.86 |
| 57 | 66 | 1.16 |
| 60 | 43 | 0.72 |
| 57 | 58 | 1.03 |
| 62 | 92 | 1.48 |
| 52 | 60 | 1.14 |
| 50 | 57 | 1.13 |
| 55 | 45 | 0.83 |
| 63 | 92 | 1.46 |
| 57 | 48 | 0.85 |
| 72 | 88 | 1.22 |
| 52 | 43 | 0.83 |
| 52 | 41 | 0.79 |
| 67 | 66 | 0.98 |
| 24 | 67 | 2.77 |
| 48 | 46 | 0.96 |
| 53 | 43 | 0.81 |
| 50 | 96 | 1.90 |
| 46 | 76 | 1.67 |
| 59 | 42 | 0.70 |
| 44 | 35 | 0.80 |
| 61 | 92 | 1.52 |
| 32 | 58 | 1.83 |
| 54 | 44 | 0.81 |
| 39 | 56 | 1.43 |
| 43 | 43 | 0.99 |
| 54 | 39 | 0.72 |
| 53 | 72 | 1.36 |
| 45 | 89 | 1.99 |
| 48 | 51 | 1.06 |
| 39 | 46 | 1.17 |
| 40 | 40 | 0.99 |
| 43 | 48 | 1.10 |
| 39 | 37 | 0.96 |
| 45 | 38 | 0.85 |
| 34 | 61 | 1.79 |
| 34 | 35 | 1.04 |
| 35 | 45 | 1.30 |
| 40 | 36 | 0.90 |
| 43 | 32 | 0.73 |
| 33 | 58 | 1.78 |
| 35 | 45 | 1.28 |
| 41 | 45 | 1.11 |
| 35 | 41 | 1.15 |
| 15 | 24 | 1.60 |
| 38 | 82 | 2.19 |
| 36 | 38 | 1.07 |
| 42 | 38 | 0.90 |
| 39 | 34 | 0.87 |
| 28 | 24 | 0.87 |

|    |    |      |
|----|----|------|
| 26 | 65 | 2.47 |
| 41 | 35 | 0.86 |
| 33 | 42 | 1.30 |
| 35 | 38 | 1.10 |
| 36 | 37 | 1.02 |
| 29 | 26 | 0.87 |
| 36 | 29 | 0.81 |
| 29 | 30 | 1.05 |
| 23 | 35 | 1.49 |
| 26 | 30 | 1.16 |
| 34 | 30 | 0.89 |
| 32 | 30 | 0.95 |
| 34 | 40 | 1.15 |
| 34 | 28 | 0.80 |
| 28 | 26 | 0.93 |
| 29 | 35 | 1.23 |
| 19 | 27 | 1.40 |
| 31 | 27 | 0.87 |
| 27 | 28 | 1.06 |
| 27 | 24 | 0.90 |
| 24 | 24 | 1.01 |
| 24 | 27 | 1.13 |
| 7  | 19 | 2.81 |
| 23 | 21 | 0.93 |
| 25 | 33 | 1.35 |
| 25 | 22 | 0.90 |
| 19 | 18 | 0.98 |
| 23 | 27 | 1.14 |
| 17 | 23 | 1.34 |
| 22 | 15 | 0.69 |
| 22 | 18 | 0.85 |
| 23 | 17 | 0.71 |
| 19 | 15 | 0.78 |
| 20 | 21 | 1.03 |
| 17 | 25 | 1.44 |
| 24 | 22 | 0.93 |
| 9  | 21 | 2.26 |
| 19 | 16 | 0.87 |
| 15 | 16 | 1.07 |
| 16 | 16 | 0.95 |
| 13 | 12 | 0.92 |
| 12 | 25 | 2.03 |
| 16 | 26 | 1.57 |
| 16 | 13 | 0.84 |
| 12 | 15 | 1.22 |
| 13 | 17 | 1.36 |
| 14 | 22 | 1.51 |
| 12 | 11 | 0.97 |
| 12 | 11 | 0.97 |
| 14 | 16 | 1.12 |
| 16 | 14 | 0.92 |
| 12 | 13 | 1.09 |
| 12 | 16 | 1.29 |
| 13 | 12 | 0.97 |
| 15 | 15 | 0.99 |
| 11 | 14 | 1.26 |
| 12 | 12 | 0.99 |
| 12 | 13 | 1.07 |
| 14 | 24 | 1.76 |

|    |    |      |
|----|----|------|
| 14 | 20 | 1.47 |
| 14 | 15 | 1.06 |
| 15 | 17 | 1.11 |
| 4  | 13 | 2.97 |
| 13 | 12 | 0.90 |
| 15 | 33 | 2.14 |
| 14 | 15 | 1.08 |
| 14 | 14 | 0.99 |
| 14 | 32 | 2.19 |
| 13 | 13 | 0.99 |
| 13 | 14 | 1.04 |
| 13 | 17 | 1.37 |
| 13 | 9  | 0.72 |
| 4  | 14 | 3.63 |
| 12 | 12 | 0.97 |
| 13 | 13 | 0.96 |
| 11 | 11 | 1.01 |
| 9  | 9  | 0.99 |
| 11 | 12 | 1.07 |
| 4  | 9  | 2.18 |
| 10 | 8  | 0.80 |
| 9  | 15 | 1.62 |
| 19 | 55 | 2.85 |
| 12 | 10 | 0.87 |
| 11 | 13 | 1.24 |
| 10 | 10 | 0.92 |
| 10 | 10 | 1.06 |
| 10 | 8  | 0.82 |
| 9  | 10 | 1.11 |
| 10 | 8  | 0.82 |
| 10 | 9  | 0.84 |
| 11 | 9  | 0.83 |
| 8  | 13 | 1.60 |
| 9  | 10 | 1.20 |
| 7  | 16 | 2.29 |
| 7  | 13 | 1.95 |
| 8  | 10 | 1.24 |
| 10 | 10 | 1.01 |
| 9  | 12 | 1.38 |
| 12 | 15 | 1.32 |
| 8  | 8  | 1.06 |
| 9  | 14 | 1.48 |
| 12 | 12 | 0.96 |
| 8  | 10 | 1.25 |
| 8  | 8  | 1.04 |
| 5  | 8  | 1.46 |
| 8  | 9  | 1.15 |
| 8  | 7  | 0.86 |
| 8  | 8  | 1.08 |
| 9  | 7  | 0.77 |
| 8  | 10 | 1.26 |
| 9  | 10 | 1.10 |
| 9  | 10 | 1.06 |
| 9  | 9  | 0.98 |
| 6  | 6  | 0.88 |
| 6  | 7  | 1.15 |
| 8  | 6  | 0.84 |
| 6  | 11 | 1.81 |
| 6  | 12 | 1.96 |



|   |    |      |
|---|----|------|
| 7 | 6  | 0.90 |
| 7 | 8  | 1.12 |
| 7 | 7  | 1.05 |
| 8 | 9  | 1.20 |
| 7 | 7  | 1.06 |
| 6 | 7  | 1.14 |
| 7 | 7  | 0.99 |
| 6 | 11 | 1.77 |
| 7 | 7  | 1.03 |
| 6 | 7  | 1.17 |
| 6 | 7  | 1.05 |
| 5 | 6  | 1.11 |
| 6 | 8  | 1.34 |
| 7 | 5  | 0.76 |
| 6 | 6  | 1.02 |
| 6 | 5  | 0.83 |
| 6 | 5  | 0.92 |
| 7 | 7  | 1.01 |
| 4 | 8  | 2.03 |
| 5 | 6  | 1.11 |
| 4 | 6  | 1.37 |
| 5 | 7  | 1.25 |
| 5 | 6  | 1.12 |
| 6 | 5  | 0.90 |
| 3 | 7  | 2.56 |
| 6 | 7  | 1.01 |
| 7 | 5  | 0.77 |
| 7 | 6  | 0.84 |
| 5 | 6  | 1.18 |
| 5 | 5  | 0.98 |
| 5 | 5  | 0.89 |
| 6 | 7  | 1.17 |
| 6 | 6  | 0.92 |
| 3 | 5  | 1.76 |
| 5 | 6  | 1.34 |
| 4 | 4  | 0.94 |
| 5 | 4  | 0.88 |
| 4 | 5  | 1.22 |
| 5 | 5  | 1.05 |
| 5 | 14 | 3.10 |
| 4 | 4  | 0.94 |
| 5 | 6  | 1.27 |
| 3 | 5  | 1.52 |
| 4 | 5  | 1.11 |
| 3 | 6  | 1.97 |
| 4 | 4  | 1.06 |
| 3 | 6  | 1.67 |
| 4 | 6  | 1.50 |
| 3 | 2  | 0.76 |
| 4 | 3  | 0.77 |
| 4 | 5  | 1.10 |
| 4 | 4  | 0.91 |
| 3 | 6  | 2.16 |
| 4 | 11 | 3.16 |
| 4 | 5  | 1.28 |
| 3 | 3  | 1.19 |
| 2 | 2  | 0.88 |
| 3 | 4  | 1.04 |
| 2 | 3  | 1.22 |

|   |   |      |
|---|---|------|
| 4 | 4 | 1.01 |
| 2 | 4 | 1.72 |
| 3 | 4 | 1.19 |
| 3 | 4 | 1.42 |
| 3 | 4 | 1.11 |
| 4 | 3 | 0.88 |
| 3 | 3 | 1.07 |
| 4 | 6 | 1.58 |
| 2 | 2 | 1.01 |
| 3 | 4 | 1.23 |
| 3 | 3 | 1.06 |
| 3 | 2 | 0.77 |
| 3 | 4 | 1.28 |
| 2 | 3 | 1.26 |
| 3 | 3 | 0.95 |
| 2 | 4 | 1.63 |
| 2 | 4 | 2.16 |
| 3 | 3 | 0.92 |
| 2 | 2 | 1.02 |
| 3 | 5 | 1.82 |
| 2 | 3 | 1.28 |
| 3 | 3 | 1.01 |
| 3 | 4 | 1.28 |
| 3 | 3 | 1.26 |
| 3 | 3 | 0.87 |
| 3 | 5 | 1.73 |
| 2 | 3 | 1.32 |
| 2 | 2 | 1.10 |
| 3 | 5 | 1.78 |
| 1 | 3 | 1.75 |
| 2 | 2 | 0.98 |
| 3 | 3 | 1.26 |
| 3 | 4 | 1.11 |
| 2 | 4 | 1.99 |
| 2 | 3 | 1.08 |
| 2 | 2 | 0.99 |
| 2 | 5 | 2.33 |
| 1 | 3 | 2.69 |
| 1 | 3 | 4.03 |
| 2 | 4 | 1.62 |
| 3 | 3 | 1.10 |
| 2 | 3 | 1.20 |
| 2 | 2 | 0.92 |
| 2 | 2 | 0.86 |
| 1 | 4 | 2.81 |
| 1 | 1 | 1.66 |
| 2 | 1 | 0.95 |
| 2 | 5 | 2.44 |
| 3 | 4 | 1.48 |
| 2 | 2 | 1.08 |
| 3 | 3 | 1.06 |
| 2 | 5 | 2.59 |
| 2 | 3 | 1.34 |
| 2 | 3 | 1.56 |
| 2 | 2 | 1.29 |
| 2 | 2 | 1.35 |
| 1 | 3 | 2.81 |
| 3 | 3 | 1.26 |
| 3 | 2 | 0.87 |

|   |   |      |
|---|---|------|
| 3 | 3 | 1.24 |
| 2 | 4 | 1.98 |
| 2 | 3 | 1.36 |
| 2 | 2 | 1.05 |
| 2 | 2 | 1.02 |
| 2 | 2 | 1.14 |
| 2 | 2 | 1.26 |
| 1 | 2 | 2.40 |
| 1 | 1 | 1.12 |
| 2 | 2 | 0.71 |
| 2 | 3 | 1.67 |
| 2 | 2 | 1.18 |
| 1 | 1 | 1.48 |
| 2 | 5 | 2.55 |
| 2 | 2 | 1.07 |
| 2 | 2 | 0.89 |
| 2 | 2 | 1.04 |
| 2 | 2 | 1.08 |
| 2 | 2 | 1.63 |
| 2 | 3 | 1.34 |
| 1 | 3 | 1.90 |
| 2 | 2 | 1.49 |
| 1 | 2 | 1.17 |
| 2 | 2 | 1.31 |
| 2 | 2 | 1.40 |
| 2 | 2 | 1.11 |
| 1 | 2 | 1.25 |
| 2 | 2 | 1.07 |
| 2 | 2 | 0.96 |
| 1 | 2 | 1.36 |
| 2 | 3 | 1.63 |
| 1 | 3 | 2.40 |
| 1 | 2 | 1.22 |
| 1 | 3 | 2.53 |
| 1 | 2 | 1.34 |
| 1 | 2 | 1.64 |
| 1 | 2 | 2.03 |
| 1 | 2 | 1.50 |
| 1 | 3 | 2.22 |
| 1 | 2 | 1.62 |
| 1 | 2 | 1.48 |
| 1 | 1 | 1.30 |
| 1 | 2 | 1.19 |
| 1 | 2 | 3.47 |
| 1 | 3 | 2.80 |
| 1 | 2 | 1.50 |
| 1 | 2 | 1.42 |
| 1 | 1 | 2.49 |
| 1 | 3 | 2.59 |
| 2 | 1 | 0.84 |
| 1 | 2 | 1.25 |
| 1 | 1 | 1.22 |
| 2 | 2 | 1.48 |
| 1 | 2 | 1.32 |
| 1 | 2 | 2.79 |
| 1 | 1 | 1.57 |
| 1 | 1 | 2.47 |
| 1 | 1 | 1.14 |
| 1 | 1 | 1.54 |

|   |   |      |
|---|---|------|
| 1 | 1 | 1.43 |
| 1 | 1 | 1.26 |
| 1 | 1 | 1.21 |
| 1 | 2 | 1.64 |
| 1 | 2 | 2.13 |
| 1 | 2 | 1.37 |
| 2 | 2 | 1.01 |
| 1 | 1 | 1.57 |
| 1 | 2 | 1.31 |
| 1 | 2 | 1.18 |
| 1 | 1 | 0.99 |
| 1 | 2 | 1.44 |
| 1 | 2 | 1.40 |
| 1 | 2 | 1.43 |
| 1 | 2 | 1.53 |
| 1 | 1 | 1.04 |
| 1 | 1 | 1.03 |
| 1 | 2 | 1.37 |
| 1 | 1 | 1.35 |
| 1 | 1 | 1.70 |
| 1 | 1 | 1.53 |
| 1 | 1 | 1.26 |
| 1 | 2 | 1.77 |
| 1 | 1 | 1.53 |
| 1 | 1 | 1.13 |
| 1 | 2 | 1.37 |
| 1 | 2 | 2.05 |
| 1 | 1 | 1.07 |
| 1 | 2 | 2.05 |
| 1 | 1 | 1.66 |
| 1 | 1 | 1.89 |
| 1 | 2 | 1.55 |
| 1 | 1 | 1.22 |
| 1 | 2 | 2.15 |
| 1 | 1 | 1.43 |
| 1 | 3 | 2.02 |
| 1 | 1 | 1.11 |
| 1 | 1 | 1.09 |

| UC ave | UC sd  | sd/ave |
|--------|--------|--------|
| 466300 | 359409 | 0.77   |
| 95796  | 107213 | 1.12   |
| 69946  | 55047  | 0.79   |
| 85100  | 62197  | 0.73   |
| 81120  | 61700  | 0.76   |

|       |       |      |
|-------|-------|------|
| 53412 | 76428 | 1.43 |
| 42864 | 41027 | 0.96 |
| 17282 | 34968 | 2.02 |
| 28322 | 36116 | 1.28 |
| 30961 | 31822 | 1.03 |
| 18817 | 18275 | 0.97 |
| 18941 | 13984 | 0.74 |
| 14434 | 14370 | 1.00 |
| 16876 | 12748 | 0.76 |
| 10192 | 17544 | 1.72 |
| 11545 | 10903 | 0.94 |
| 7170  | 11995 | 1.67 |
| 8726  | 9877  | 1.13 |
| 8026  | 9388  | 1.17 |
| 8456  | 7531  | 0.89 |
| 6721  | 6994  | 1.04 |
| 6417  | 6435  | 1.00 |
| 5348  | 6254  | 1.17 |
| 4390  | 6235  | 1.42 |
| 4054  | 4916  | 1.21 |
| 5128  | 4743  | 0.92 |
| 5305  | 4743  | 0.89 |
| 4530  | 5233  | 1.16 |
| 3844  | 3237  | 0.84 |
| 4063  | 3078  | 0.76 |
| 3875  | 4071  | 1.05 |
| 4500  | 3521  | 0.78 |
| 2845  | 4904  | 1.72 |
| 4300  | 14759 | 3.43 |
| 3453  | 2965  | 0.86 |
| 4093  | 3319  | 0.81 |
| 3832  | 3670  | 0.96 |
| 2734  | 2682  | 0.98 |
| 2980  | 3044  | 1.02 |
| 3365  | 4011  | 1.19 |
| 2595  | 2473  | 0.95 |
| 2518  | 1947  | 0.77 |
| 2157  | 1622  | 0.75 |
| 1536  | 2347  | 1.53 |
| 1776  | 1176  | 0.66 |
| 1827  | 1435  | 0.79 |
| 1663  | 1628  | 0.98 |
| 1986  | 1712  | 0.86 |
| 547   | 1500  | 2.74 |
| 1547  | 3111  | 2.01 |
| 1175  | 1055  | 0.90 |
| 1261  | 1940  | 1.54 |
| 1308  | 1153  | 0.88 |
| 1333  | 1516  | 1.14 |
| 1171  | 1183  | 1.01 |
| 470   | 1312  | 2.79 |
| 1077  | 1134  | 1.05 |
| 1030  | 1085  | 1.05 |
| 1048  | 826   | 0.79 |
| 1092  | 905   | 0.83 |
| 916   | 1013  | 1.11 |
| 949   | 1067  | 1.12 |
| 438   | 779   | 1.78 |
| 325   | 1148  | 3.54 |

|      |      |      |
|------|------|------|
| 1072 | 891  | 0.83 |
| 695  | 826  | 1.19 |
| 565  | 1037 | 1.84 |
| 477  | 689  | 1.44 |
| 536  | 734  | 1.37 |
| 800  | 968  | 1.21 |
| 694  | 537  | 0.77 |
| 719  | 581  | 0.81 |
| 473  | 827  | 1.75 |
| 615  | 673  | 1.09 |
| 411  | 433  | 1.05 |
| 601  | 631  | 1.05 |
| 670  | 741  | 1.11 |
| 453  | 371  | 0.82 |
| 593  | 512  | 0.86 |
| 499  | 571  | 1.15 |
| 443  | 429  | 0.97 |
| 493  | 391  | 0.79 |
| 531  | 461  | 0.87 |
| 521  | 1432 | 2.75 |
| 340  | 413  | 1.21 |
| 362  | 338  | 0.93 |
| 456  | 315  | 0.69 |
| 266  | 397  | 1.49 |
| 311  | 317  | 1.02 |
| 388  | 375  | 0.97 |
| 309  | 257  | 0.83 |
| 88   | 279  | 3.17 |
| 278  | 241  | 0.87 |
| 247  | 314  | 1.27 |
| 191  | 401  | 2.10 |
| 240  | 367  | 1.53 |
| 282  | 231  | 0.82 |
| 260  | 206  | 0.79 |
| 236  | 183  | 0.78 |
| 188  | 349  | 1.86 |
| 226  | 255  | 1.13 |
| 206  | 186  | 0.90 |
| 247  | 179  | 0.72 |
| 217  | 203  | 0.93 |
| 190  | 225  | 1.19 |
| 158  | 245  | 1.55 |
| 176  | 157  | 0.89 |
| 182  | 164  | 0.90 |
| 158  | 252  | 1.59 |
| 161  | 215  | 1.33 |
| 181  | 219  | 1.21 |
| 183  | 164  | 0.90 |
| 164  | 181  | 1.11 |
| 149  | 183  | 1.23 |
| 138  | 127  | 0.92 |
| 174  | 151  | 0.87 |
| 141  | 129  | 0.92 |
| 127  | 161  | 1.27 |
| 127  | 161  | 1.27 |
| 139  | 127  | 0.91 |
| 131  | 103  | 0.78 |
| 136  | 117  | 0.86 |
| 116  | 160  | 1.38 |

|     |     |      |
|-----|-----|------|
| 133 | 174 | 1.30 |
| 59  | 156 | 2.67 |
| 129 | 106 | 0.82 |
| 87  | 64  | 0.74 |
| 123 | 116 | 0.94 |
| 106 | 90  | 0.86 |
| 106 | 102 | 0.97 |
| 68  | 99  | 1.45 |
| 94  | 103 | 1.09 |
| 91  | 92  | 1.02 |
| 88  | 82  | 0.93 |
| 72  | 127 | 1.76 |
| 94  | 87  | 0.93 |
| 79  | 64  | 0.81 |
| 85  | 75  | 0.88 |
| 72  | 71  | 0.98 |
| 72  | 61  | 0.85 |
| 85  | 60  | 0.71 |
| 76  | 82  | 1.07 |
| 98  | 88  | 0.90 |
| 63  | 55  | 0.87 |
| 34  | 73  | 2.16 |
| 83  | 77  | 0.93 |
| 67  | 57  | 0.86 |
| 57  | 66  | 1.16 |
| 60  | 43  | 0.72 |
| 57  | 58  | 1.03 |
| 62  | 92  | 1.48 |
| 52  | 60  | 1.14 |
| 50  | 57  | 1.13 |
| 55  | 45  | 0.83 |
| 63  | 92  | 1.46 |
| 57  | 48  | 0.85 |
| 72  | 88  | 1.22 |
| 52  | 43  | 0.83 |
| 52  | 41  | 0.79 |
| 67  | 66  | 0.98 |
| 24  | 67  | 2.77 |
| 48  | 46  | 0.96 |
| 53  | 43  | 0.81 |
| 50  | 96  | 1.90 |
| 46  | 76  | 1.67 |
| 59  | 42  | 0.70 |
| 44  | 35  | 0.80 |
| 61  | 92  | 1.52 |
| 32  | 58  | 1.83 |
| 54  | 44  | 0.81 |
| 39  | 56  | 1.43 |
| 43  | 43  | 0.99 |
| 54  | 39  | 0.72 |
| 53  | 72  | 1.36 |
| 45  | 89  | 1.99 |
| 48  | 51  | 1.06 |
| 39  | 46  | 1.17 |
| 40  | 40  | 0.99 |
| 43  | 48  | 1.10 |
| 39  | 37  | 0.96 |
| 45  | 38  | 0.85 |
| 34  | 61  | 1.79 |

|    |    |      |
|----|----|------|
| 34 | 35 | 1.04 |
| 35 | 45 | 1.30 |
| 40 | 36 | 0.90 |
| 43 | 32 | 0.73 |
| 33 | 58 | 1.78 |
| 35 | 45 | 1.28 |
| 41 | 45 | 1.11 |
| 35 | 41 | 1.15 |
| 15 | 24 | 1.60 |
| 38 | 82 | 2.19 |
| 36 | 38 | 1.07 |
| 42 | 38 | 0.90 |
| 39 | 34 | 0.87 |
| 28 | 24 | 0.87 |
| 26 | 65 | 2.47 |
| 41 | 35 | 0.86 |
| 33 | 42 | 1.30 |
| 35 | 38 | 1.10 |
| 36 | 37 | 1.02 |
| 29 | 26 | 0.87 |
| 36 | 29 | 0.81 |
| 29 | 30 | 1.05 |
| 23 | 35 | 1.49 |
| 26 | 30 | 1.16 |
| 34 | 30 | 0.89 |
| 32 | 30 | 0.95 |
| 34 | 40 | 1.15 |
| 34 | 28 | 0.80 |
| 28 | 26 | 0.93 |
| 29 | 35 | 1.23 |
| 19 | 27 | 1.40 |
| 31 | 27 | 0.87 |
| 27 | 28 | 1.06 |
| 27 | 24 | 0.90 |
| 24 | 24 | 1.01 |
| 24 | 27 | 1.13 |
| 7  | 19 | 2.81 |
| 23 | 21 | 0.93 |
| 25 | 33 | 1.35 |
| 25 | 22 | 0.90 |
| 19 | 18 | 0.98 |
| 23 | 27 | 1.14 |
| 17 | 23 | 1.34 |
| 22 | 15 | 0.69 |
| 22 | 18 | 0.85 |
| 23 | 17 | 0.71 |
| 19 | 15 | 0.78 |
| 20 | 21 | 1.03 |
| 17 | 25 | 1.44 |
| 24 | 22 | 0.93 |
| 9  | 21 | 2.26 |
| 19 | 16 | 0.87 |
| 15 | 16 | 1.07 |
| 16 | 16 | 0.95 |
| 13 | 12 | 0.92 |
| 12 | 25 | 2.03 |
| 16 | 26 | 1.57 |
| 16 | 13 | 0.84 |
| 12 | 15 | 1.22 |



|    |    |      |
|----|----|------|
| 13 | 17 | 1.36 |
| 14 | 22 | 1.51 |
| 12 | 11 | 0.97 |
| 12 | 11 | 0.97 |
| 14 | 16 | 1.12 |
| 16 | 14 | 0.92 |
| 12 | 13 | 1.09 |
| 12 | 16 | 1.29 |
| 13 | 12 | 0.97 |
| 15 | 15 | 0.99 |
| 11 | 14 | 1.26 |
| 12 | 12 | 0.99 |
| 12 | 13 | 1.07 |
| 14 | 24 | 1.76 |
| 14 | 20 | 1.47 |
| 14 | 15 | 1.06 |
| 15 | 17 | 1.11 |
| 4  | 13 | 2.97 |
| 13 | 12 | 0.90 |
| 15 | 33 | 2.14 |
| 14 | 15 | 1.08 |
| 14 | 14 | 0.99 |
| 14 | 32 | 2.19 |
| 13 | 13 | 0.99 |
| 13 | 14 | 1.04 |
| 13 | 17 | 1.37 |
| 13 | 9  | 0.72 |
| 4  | 14 | 3.63 |
| 12 | 12 | 0.97 |
| 13 | 13 | 0.96 |
| 11 | 11 | 1.01 |
| 9  | 9  | 0.99 |
| 11 | 12 | 1.07 |
| 4  | 9  | 2.18 |
| 10 | 8  | 0.80 |
| 9  | 15 | 1.62 |
| 19 | 55 | 2.85 |
| 12 | 10 | 0.87 |
| 11 | 13 | 1.24 |
| 10 | 10 | 0.92 |
| 10 | 10 | 1.06 |
| 10 | 8  | 0.82 |
| 9  | 10 | 1.11 |
| 10 | 8  | 0.82 |
| 10 | 9  | 0.84 |
| 11 | 9  | 0.83 |
| 8  | 13 | 1.60 |
| 9  | 10 | 1.20 |
| 7  | 16 | 2.29 |
| 7  | 13 | 1.95 |
| 8  | 10 | 1.24 |
| 10 | 10 | 1.01 |
| 9  | 12 | 1.38 |
| 12 | 15 | 1.32 |
| 8  | 8  | 1.06 |
| 9  | 14 | 1.48 |
| 12 | 12 | 0.96 |
| 8  | 10 | 1.25 |
| 8  | 8  | 1.04 |

|   |    |      |
|---|----|------|
| 5 | 8  | 1.46 |
| 8 | 9  | 1.15 |
| 8 | 7  | 0.86 |
| 8 | 8  | 1.08 |
| 9 | 7  | 0.77 |
| 8 | 10 | 1.26 |
| 9 | 10 | 1.10 |
| 9 | 10 | 1.06 |
| 9 | 9  | 0.98 |
| 6 | 6  | 0.88 |
| 6 | 7  | 1.15 |
| 8 | 6  | 0.84 |
| 6 | 11 | 1.81 |
| 6 | 12 | 1.96 |
| 7 | 6  | 0.90 |
| 7 | 8  | 1.12 |
| 7 | 7  | 1.05 |
| 8 | 9  | 1.20 |
| 7 | 7  | 1.06 |
| 6 | 7  | 1.14 |
| 7 | 7  | 0.99 |
| 6 | 11 | 1.77 |
| 7 | 7  | 1.03 |
| 6 | 7  | 1.17 |
| 6 | 7  | 1.05 |
| 5 | 6  | 1.11 |
| 6 | 8  | 1.34 |
| 7 | 5  | 0.76 |
| 6 | 6  | 1.02 |
| 6 | 5  | 0.83 |
| 6 | 5  | 0.92 |
| 7 | 7  | 1.01 |
| 4 | 8  | 2.03 |
| 5 | 6  | 1.11 |
| 4 | 6  | 1.37 |
| 5 | 7  | 1.25 |
| 5 | 6  | 1.12 |
| 6 | 5  | 0.90 |
| 3 | 7  | 2.56 |
| 6 | 7  | 1.01 |
| 7 | 5  | 0.77 |
| 7 | 6  | 0.84 |
| 5 | 6  | 1.18 |
| 5 | 5  | 0.98 |
| 5 | 5  | 0.89 |
| 6 | 7  | 1.17 |
| 6 | 6  | 0.92 |
| 3 | 5  | 1.76 |
| 5 | 6  | 1.34 |
| 4 | 4  | 0.94 |
| 5 | 4  | 0.88 |
| 4 | 5  | 1.22 |
| 5 | 5  | 1.05 |
| 5 | 14 | 3.10 |
| 4 | 4  | 0.94 |
| 5 | 6  | 1.27 |
| 3 | 5  | 1.52 |
| 4 | 5  | 1.11 |
| 3 | 6  | 1.97 |

|   |    |      |
|---|----|------|
| 4 | 4  | 1.06 |
| 3 | 6  | 1.67 |
| 4 | 6  | 1.50 |
| 3 | 2  | 0.76 |
| 4 | 3  | 0.77 |
| 4 | 5  | 1.10 |
| 4 | 4  | 0.91 |
| 3 | 6  | 2.16 |
| 4 | 11 | 3.16 |
| 4 | 5  | 1.28 |
| 3 | 3  | 1.19 |
| 2 | 2  | 0.88 |
| 3 | 4  | 1.04 |
| 2 | 3  | 1.22 |
| 4 | 4  | 1.01 |
| 2 | 4  | 1.72 |
| 3 | 4  | 1.19 |
| 3 | 4  | 1.42 |
| 3 | 4  | 1.11 |
| 4 | 3  | 0.88 |
| 3 | 3  | 1.07 |
| 4 | 6  | 1.58 |
| 2 | 2  | 1.01 |
| 3 | 4  | 1.23 |
| 3 | 3  | 1.06 |
| 3 | 2  | 0.77 |
| 3 | 4  | 1.28 |
| 2 | 3  | 1.26 |
| 3 | 3  | 0.95 |
| 2 | 4  | 1.63 |
| 2 | 4  | 2.16 |
| 3 | 3  | 0.92 |
| 2 | 2  | 1.02 |
| 3 | 5  | 1.82 |
| 2 | 3  | 1.28 |
| 3 | 3  | 1.01 |
| 3 | 4  | 1.28 |
| 3 | 3  | 1.26 |
| 3 | 3  | 0.87 |
| 3 | 5  | 1.73 |
| 2 | 3  | 1.32 |
| 2 | 2  | 1.10 |
| 3 | 5  | 1.78 |
| 1 | 3  | 1.75 |
| 2 | 2  | 0.98 |
| 3 | 3  | 1.26 |
| 3 | 4  | 1.11 |
| 2 | 4  | 1.99 |
| 2 | 3  | 1.08 |
| 2 | 2  | 0.99 |
| 2 | 5  | 2.33 |
| 1 | 3  | 2.69 |
| 1 | 3  | 4.03 |
| 2 | 4  | 1.62 |
| 3 | 3  | 1.10 |
| 2 | 3  | 1.20 |
| 2 | 2  | 0.92 |
| 2 | 2  | 0.86 |
| 1 | 4  | 2.81 |

|   |   |      |
|---|---|------|
| 1 | 1 | 1.66 |
| 2 | 1 | 0.95 |
| 2 | 5 | 2.44 |
| 3 | 4 | 1.48 |
| 2 | 2 | 1.08 |
| 3 | 3 | 1.06 |
| 2 | 5 | 2.59 |
| 2 | 3 | 1.34 |
| 2 | 3 | 1.56 |
| 2 | 2 | 1.29 |
| 2 | 2 | 1.35 |
| 1 | 3 | 2.81 |
| 3 | 3 | 1.26 |
| 3 | 2 | 0.87 |
| 3 | 3 | 1.24 |
| 2 | 4 | 1.98 |
| 2 | 3 | 1.36 |
| 2 | 2 | 1.05 |
| 2 | 2 | 1.02 |
| 2 | 2 | 1.14 |
| 2 | 2 | 1.26 |
| 1 | 2 | 2.40 |
| 1 | 1 | 1.12 |
| 2 | 2 | 0.71 |
| 2 | 3 | 1.67 |
| 2 | 2 | 1.18 |
| 1 | 1 | 1.48 |
| 2 | 5 | 2.55 |
| 2 | 2 | 1.07 |
| 2 | 2 | 0.89 |
| 2 | 2 | 1.04 |
| 2 | 2 | 1.08 |
| 2 | 2 | 1.63 |
| 2 | 3 | 1.34 |
| 1 | 3 | 1.90 |
| 2 | 2 | 1.49 |
| 1 | 2 | 1.17 |
| 2 | 2 | 1.31 |
| 2 | 2 | 1.40 |
| 2 | 2 | 1.11 |
| 1 | 2 | 1.25 |
| 2 | 2 | 1.07 |
| 2 | 2 | 0.96 |
| 1 | 2 | 1.36 |
| 2 | 3 | 1.63 |
| 1 | 3 | 2.40 |
| 1 | 2 | 1.22 |
| 1 | 3 | 2.53 |
| 1 | 2 | 1.34 |
| 1 | 2 | 1.64 |
| 1 | 2 | 2.03 |
| 1 | 2 | 1.50 |
| 1 | 3 | 2.22 |
| 1 | 2 | 1.62 |
| 1 | 2 | 1.48 |
| 1 | 1 | 1.30 |
| 1 | 2 | 1.19 |
| 1 | 2 | 3.47 |
| 1 | 3 | 2.80 |

|   |   |      |
|---|---|------|
| 1 | 2 | 1.50 |
| 1 | 2 | 1.42 |
| 1 | 1 | 2.49 |
| 1 | 3 | 2.59 |
| 2 | 1 | 0.84 |
| 1 | 2 | 1.25 |
| 1 | 1 | 1.22 |
| 2 | 2 | 1.48 |
| 1 | 2 | 1.32 |
| 1 | 2 | 2.79 |
| 1 | 1 | 1.57 |
| 1 | 1 | 2.47 |
| 1 | 1 | 1.14 |
| 1 | 1 | 1.54 |
| 1 | 1 | 1.43 |
| 1 | 1 | 1.26 |
| 1 | 1 | 1.21 |
| 1 | 2 | 1.64 |
| 1 | 2 | 2.13 |
| 1 | 2 | 1.37 |
| 2 | 2 | 1.01 |
| 1 | 1 | 1.57 |
| 1 | 2 | 1.31 |
| 1 | 2 | 1.18 |
| 1 | 1 | 0.99 |
| 1 | 2 | 1.44 |
| 1 | 2 | 1.40 |
| 1 | 2 | 1.43 |
| 1 | 2 | 1.53 |
| 1 | 1 | 1.04 |
| 1 | 1 | 1.03 |
| 1 | 2 | 1.37 |
| 1 | 1 | 1.35 |
| 1 | 1 | 1.70 |
| 1 | 1 | 1.53 |
| 1 | 1 | 1.26 |
| 1 | 2 | 1.77 |
| 1 | 1 | 1.53 |
| 1 | 1 | 1.13 |
| 1 | 2 | 1.37 |
| 1 | 2 | 2.05 |
| 1 | 1 | 1.07 |
| 1 | 2 | 2.05 |
| 1 | 1 | 1.66 |
| 1 | 1 | 1.89 |
| 1 | 2 | 1.55 |
| 1 | 1 | 1.22 |
| 1 | 2 | 2.15 |
| 1 | 1 | 1.43 |
| 1 | 3 | 2.02 |
| 1 | 1 | 1.11 |
| 1 | 1 | 1.09 |

| ave UCs | sd UCs | sd/ave |
|---------|--------|--------|
| 11.62   | 4.46   | 0.38   |
| 3.27    | 3.41   | 1.04   |
| 2.11    | 1.33   | 0.63   |
| 2.45    | 1.01   | 0.41   |
| 2.16    | 0.90   | 0.42   |
| 1.19    | 1.11   | 0.93   |
| 1.17    | 0.63   | 0.54   |
| 0.34    | 0.55   | 1.62   |
| 0.59    | 0.50   | 0.85   |
| 0.76    | 0.39   | 0.51   |
| 0.47    | 0.27   | 0.56   |
| 0.49    | 0.11   | 0.23   |
| 0.36    | 0.17   | 0.49   |
| 0.47    | 0.17   | 0.37   |
| 0.22    | 0.22   | 0.99   |
| 0.30    | 0.23   | 0.77   |
| 0.16    | 0.16   | 1.01   |
| 0.21    | 0.10   | 0.47   |
| 0.18    | 0.11   | 0.62   |
| 0.23    | 0.10   | 0.44   |
| 0.16    | 0.06   | 0.40   |
| 0.15    | 0.07   | 0.43   |
| 0.12    | 0.08   | 0.68   |
| 0.12    | 0.11   | 0.89   |
| 0.13    | 0.17   | 1.30   |
| 0.11    | 0.05   | 0.46   |
| 0.14    | 0.06   | 0.45   |
| 0.11    | 0.10   | 0.92   |
| 0.11    | 0.05   | 0.48   |
| 0.10    | 0.04   | 0.42   |
| 0.09    | 0.04   | 0.47   |
| 0.12    | 0.05   | 0.42   |
| 0.06    | 0.07   | 1.11   |
| 0.07    | 0.18   | 2.50   |
| 0.09    | 0.04   | 0.47   |
| 0.14    | 0.16   | 1.14   |
| 0.11    | 0.08   | 0.75   |
| 0.09    | 0.10   | 1.05   |
| 0.10    | 0.08   | 0.84   |
| 0.10    | 0.12   | 1.24   |
| 0.08    | 0.05   | 0.64   |
| 0.07    | 0.03   | 0.48   |
| 0.06    | 0.02   | 0.38   |
| 0.04    | 0.04   | 1.08   |
| 0.06    | 0.05   | 0.75   |
| 0.05    | 0.01   | 0.30   |
| 0.04    | 0.02   | 0.61   |
| 0.05    | 0.03   | 0.61   |
| 0.01    | 0.03   | 2.50   |
| 0.03    | 0.04   | 1.45   |
| 0.04    | 0.02   | 0.52   |
| 0.03    | 0.03   | 1.00   |

|      |      |      |
|------|------|------|
| 0.04 | 0.01 | 0.36 |
| 0.03 | 0.02 | 0.65 |
| 0.02 | 0.02 | 0.72 |
| 0.01 | 0.02 | 2.61 |
| 0.03 | 0.01 | 0.44 |
| 0.02 | 0.01 | 0.50 |
| 0.03 | 0.01 | 0.44 |
| 0.04 | 0.04 | 0.93 |
| 0.02 | 0.01 | 0.51 |
| 0.02 | 0.01 | 0.55 |
| 0.01 | 0.01 | 1.37 |
| 0.01 | 0.02 | 3.38 |
| 0.03 | 0.02 | 0.59 |
| 0.02 | 0.01 | 0.63 |
| 0.01 | 0.01 | 1.13 |
| 0.01 | 0.01 | 0.97 |
| 0.01 | 0.01 | 0.69 |
| 0.03 | 0.08 | 2.34 |
| 0.02 | 0.01 | 0.66 |
| 0.02 | 0.01 | 0.50 |
| 0.01 | 0.01 | 1.06 |
| 0.01 | 0.01 | 0.55 |
| 0.01 | 0.01 | 0.73 |
| 0.02 | 0.01 | 0.70 |
| 0.01 | 0.01 | 0.57 |
| 0.02 | 0.04 | 1.79 |
| 0.02 | 0.01 | 0.62 |
| 0.01 | 0.01 | 0.72 |
| 0.01 | 0.01 | 0.46 |
| 0.01 | 0.01 | 0.57 |
| 0.02 | 0.01 | 0.65 |
| 0.01 | 0.02 | 1.96 |
| 0.01 | 0.01 | 0.75 |
| 0.01 | 0.01 | 0.64 |
| 0.01 | 0.01 | 0.38 |
| 0.01 | 0.01 | 0.99 |
| 0.01 | 0.00 | 0.45 |
| 0.01 | 0.01 | 0.68 |
| 0.01 | 0.00 | 0.49 |
| 0.00 | 0.01 | 3.17 |
| 0.01 | 0.00 | 0.57 |
| 0.01 | 0.00 | 0.86 |
| 0.00 | 0.01 | 1.43 |
| 0.01 | 0.01 | 0.84 |
| 0.01 | 0.00 | 0.53 |
| 0.01 | 0.00 | 0.38 |
| 0.01 | 0.00 | 0.57 |
| 0.00 | 0.00 | 1.23 |
| 0.01 | 0.01 | 0.98 |
| 0.00 | 0.00 | 0.50 |
| 0.01 | 0.00 | 0.62 |
| 0.01 | 0.01 | 1.44 |
| 0.00 | 0.00 | 0.65 |
| 0.00 | 0.00 | 1.02 |
| 0.01 | 0.00 | 0.61 |
| 0.01 | 0.01 | 1.03 |
| 0.00 | 0.00 | 0.84 |
| 0.00 | 0.00 | 0.75 |
| 0.00 | 0.00 | 0.67 |

|      |      |      |
|------|------|------|
| 0.00 | 0.00 | 0.42 |
| 0.00 | 0.00 | 0.73 |
| 0.00 | 0.00 | 0.75 |
| 0.00 | 0.00 | 0.68 |
| 0.00 | 0.00 | 0.48 |
| 0.00 | 0.00 | 0.49 |
| 0.00 | 0.00 | 0.74 |
| 0.00 | 0.00 | 0.74 |
| 0.00 | 0.00 | 0.83 |
| 0.00 | 0.00 | 0.78 |
| 0.00 | 0.00 | 0.49 |
| 0.00 | 0.00 | 1.04 |
| 0.00 | 0.00 | 0.83 |
| 0.00 | 0.00 | 2.55 |
| 0.00 | 0.00 | 0.60 |
| 0.00 | 0.00 | 0.72 |
| 0.00 | 0.00 | 0.66 |
| 0.00 | 0.00 | 0.87 |
| 0.00 | 0.00 | 1.23 |
| 0.00 | 0.00 | 1.32 |
| 0.00 | 0.00 | 0.58 |
| 0.00 | 0.00 | 0.65 |
| 0.00 | 0.00 | 0.90 |
| 0.00 | 0.00 | 1.16 |
| 0.00 | 0.00 | 0.50 |
| 0.00 | 0.00 | 0.55 |
| 0.00 | 0.00 | 0.61 |
| 0.00 | 0.00 | 0.51 |
| 0.00 | 0.00 | 0.53 |
| 0.00 | 0.00 | 0.48 |
| 0.00 | 0.00 | 0.47 |
| 0.00 | 0.00 | 1.08 |
| 0.00 | 0.00 | 0.71 |
| 0.00 | 0.00 | 1.62 |
| 0.00 | 0.00 | 0.57 |
| 0.00 | 0.00 | 0.60 |
| 0.00 | 0.00 | 0.72 |
| 0.00 | 0.00 | 0.73 |
| 0.00 | 0.00 | 0.73 |
| 0.00 | 0.00 | 0.96 |
| 0.00 | 0.00 | 0.73 |
| 0.00 | 0.00 | 1.09 |
| 0.00 | 0.00 | 0.45 |
| 0.00 | 0.00 | 1.24 |
| 0.00 | 0.00 | 0.50 |
| 0.00 | 0.00 | 1.21 |
| 0.00 | 0.00 | 0.68 |
| 0.00 | 0.00 | 0.61 |
| 0.00 | 0.00 | 0.65 |
| 0.00 | 0.00 | 2.63 |
| 0.00 | 0.00 | 0.55 |
| 0.00 | 0.00 | 0.73 |
| 0.00 | 0.00 | 1.10 |
| 0.00 | 0.00 | 1.00 |
| 0.00 | 0.00 | 0.66 |
| 0.00 | 0.00 | 0.61 |
| 0.00 | 0.00 | 1.21 |
| 0.00 | 0.00 | 1.56 |
| 0.00 | 0.00 | 0.70 |



|      |      |      |
|------|------|------|
| 0.00 | 0.00 | 0.88 |
| 0.00 | 0.00 | 0.64 |
| 0.00 | 0.00 | 0.38 |
| 0.00 | 0.00 | 0.79 |
| 0.00 | 0.00 | 1.44 |
| 0.00 | 0.00 | 0.99 |
| 0.00 | 0.00 | 1.21 |
| 0.00 | 0.00 | 0.55 |
| 0.00 | 0.00 | 0.85 |
| 0.00 | 0.00 | 0.81 |
| 0.00 | 0.00 | 0.62 |
| 0.00 | 0.00 | 1.25 |
| 0.00 | 0.00 | 1.10 |
| 0.00 | 0.00 | 0.83 |
| 0.00 | 0.00 | 0.62 |
| 0.00 | 0.00 | 0.55 |
| 0.00 | 0.00 | 1.23 |
| 0.00 | 0.00 | 1.09 |
| 0.00 | 0.00 | 0.76 |
| 0.00 | 0.00 | 0.76 |
| 0.00 | 0.00 | 2.37 |
| 0.00 | 0.00 | 1.51 |
| 0.00 | 0.00 | 0.63 |
| 0.00 | 0.00 | 0.92 |
| 0.00 | 0.00 | 0.49 |
| 0.00 | 0.00 | 0.70 |
| 0.00 | 0.00 | 2.46 |
| 0.00 | 0.00 | 0.46 |
| 0.00 | 0.00 | 0.81 |
| 0.00 | 0.00 | 0.85 |
| 0.00 | 0.00 | 0.90 |
| 0.00 | 0.00 | 1.08 |
| 0.00 | 0.00 | 0.62 |
| 0.00 | 0.00 | 0.53 |
| 0.00 | 0.00 | 1.00 |
| 0.00 | 0.00 | 1.13 |
| 0.00 | 0.00 | 0.53 |
| 0.00 | 0.00 | 0.52 |
| 0.00 | 0.00 | 0.76 |
| 0.00 | 0.00 | 0.57 |
| 0.00 | 0.00 | 0.87 |
| 0.00 | 0.00 | 0.72 |
| 0.00 | 0.00 | 1.37 |
| 0.00 | 0.00 | 0.58 |
| 0.00 | 0.00 | 0.72 |
| 0.00 | 0.00 | 0.57 |
| 0.00 | 0.00 | 0.63 |
| 0.00 | 0.00 | 0.86 |
| 0.00 | 0.00 | 3.05 |
| 0.00 | 0.00 | 0.62 |
| 0.00 | 0.00 | 1.46 |
| 0.00 | 0.00 | 0.52 |
| 0.00 | 0.00 | 0.75 |
| 0.00 | 0.00 | 0.78 |
| 0.00 | 0.00 | 0.98 |
| 0.00 | 0.00 | 0.58 |
| 0.00 | 0.00 | 0.59 |
| 0.00 | 0.00 | 0.87 |
| 0.00 | 0.00 | 0.79 |

|      |      |      |
|------|------|------|
| 0.00 | 0.00 | 0.78 |
| 0.00 | 0.00 | 0.94 |
| 0.00 | 0.00 | 0.51 |
| 0.00 | 0.00 | 1.88 |
| 0.00 | 0.00 | 0.66 |
| 0.00 | 0.00 | 0.70 |
| 0.00 | 0.00 | 0.78 |
| 0.00 | 0.00 | 0.74 |
| 0.00 | 0.00 | 1.33 |
| 0.00 | 0.00 | 1.17 |
| 0.00 | 0.00 | 0.48 |
| 0.00 | 0.00 | 1.06 |
| 0.00 | 0.00 | 0.87 |
| 0.00 | 0.00 | 1.14 |
| 0.00 | 0.00 | 0.97 |
| 0.00 | 0.00 | 0.97 |
| 0.00 | 0.00 | 0.99 |
| 0.00 | 0.00 | 0.70 |
| 0.00 | 0.00 | 0.75 |
| 0.00 | 0.00 | 1.01 |
| 0.00 | 0.00 | 0.89 |
| 0.00 | 0.00 | 0.58 |
| 0.00 | 0.00 | 0.78 |
| 0.00 | 0.00 | 0.84 |
| 0.00 | 0.00 | 1.02 |
| 0.00 | 0.00 | 1.06 |
| 0.00 | 0.00 | 1.26 |
| 0.00 | 0.00 | 0.78 |
| 0.00 | 0.00 | 0.90 |
| 0.00 | 0.00 | 2.79 |

all 95 samples

|          |      |
|----------|------|
| B_33vC_2 | 4465 |
| B_33vC_2 | 4465 |
| B_33vC_2 | 0.61 |

1

| ave UCs | sd UCs |
|---------|--------|
| 0.00    | 1.00   |
| 0.00    | 1.00   |
| 0.00    | 1.00   |
| 0.00    | 1.00   |
| 0.00    | 1.00   |
| 0.00    | 1.00   |
| 0.00    | 1.00   |
| 0.00    | 1.00   |

| 1     |       |
|-------|-------|
| <hr/> |       |
| A_11  |       |
| <hr/> |       |
| A_11  |       |
| A_16  | -0.24 |
| A_2   | -0.10 |
| A_4   | 0.20  |
| B_29  | -0.20 |
| B_32  | 0.02  |
| B_34  | 0.32  |
| C_1   | 0.15  |

|      |      |      |       |
|------|------|------|-------|
| 0.00 | 1.00 | C_40 | -0.10 |
| 0.00 | 1.00 | C_41 | -0.01 |
| 0.00 | 1.00 | C_42 | -0.37 |
| 0.00 | 1.00 | C_44 | -0.07 |
| 0.00 | 1.00 | C_46 | -0.16 |
| 0.00 | 1.00 | C_47 | 0.24  |
| 0.00 | 1.00 | D_16 | 0.05  |
| 0.00 | 1.00 | D_17 | -0.27 |
| 0.00 | 1.00 | D_18 | 0.37  |
| 0.00 | 1.00 | D_36 | 0.23  |
| 0.00 | 1.00 | D_4  | -0.03 |
| 0.00 | 1.00 | E_47 | -0.33 |
| 0.00 | 1.00 | F_43 | -0.11 |
| 0.00 | 1.00 | F_6  | 0.17  |
| 0.00 | 1.00 | F_7  | 0.19  |
| 0.00 | 1.00 | F_8  | 0.28  |
| 0.00 | 1.00 | G_33 | -0.20 |
| 0.00 | 1.00 | G_34 | 0.11  |
| 0.00 | 1.00 | G_8  | -0.26 |
| 0.00 | 1.00 | A_1  | -0.29 |
| 0.00 | 1.00 | A_13 | -0.13 |
| 0.00 | 1.00 | A_14 | -0.10 |
| 0.00 | 1.00 | A_15 | 0.08  |
| 0.00 | 1.00 | A_17 | -0.22 |
| 0.00 | 1.00 | B_30 | -0.34 |
| 0.00 | 1.00 | B_33 | 0.37  |
| 0.00 | 1.00 | C_2  | 0.41  |
| 0.00 | 1.00 | C_37 | 0.13  |
| 0.00 | 1.00 | C_38 | 0.03  |
| 0.00 | 1.00 | C_39 | 0.25  |
| 0.00 | 1.00 | C_43 | 0.10  |
| 0.00 | 1.00 | C_48 | -0.03 |
| 0.00 | 1.00 | D_10 | 0.43  |
| 0.00 | 1.00 | D_12 | 0.38  |
| 0.00 | 1.00 | D_13 | 0.30  |
| 0.00 | 1.00 | D_14 | 0.11  |
| 0.00 | 1.00 | D_3  | -0.04 |
| 0.00 | 1.00 | D_9  | 0.36  |
| 0.00 | 1.00 | E_20 | -0.18 |
| 0.00 | 1.00 | E_29 | 0.13  |
| 0.00 | 1.00 | E_4  | 0.03  |
| 0.00 | 1.00 | E_5  | 0.13  |
| 0.00 | 1.00 | E_6  | 0.02  |
| 0.00 | 1.00 | F_1  | 0.30  |
| 0.00 | 1.00 | F_35 | 0.28  |
| 0.00 | 1.00 | F_36 | 0.05  |
| 0.00 | 1.00 | F_37 | -0.05 |





|       |       |       |       |       |       |
|-------|-------|-------|-------|-------|-------|
| -0.39 | 0.58  | -0.20 | 0.13  | -0.24 | -0.77 |
| -0.67 | 0.92  | 1.40  | 1.01  | -0.70 | -0.27 |
| -0.41 | 0.85  | 1.59  | 1.26  | -0.55 | -0.11 |
| -0.58 | 0.84  | 0.76  | 0.74  | -0.65 | -0.20 |
| -0.60 | 0.69  | 0.34  | 0.24  | -0.50 | -0.59 |
| -0.69 | -0.56 | -0.61 | 2.14  | -0.44 | 0.03  |
| -0.48 | -1.03 | -0.86 | -0.86 | 1.26  | -0.23 |
| 0.93  | -1.52 | -1.86 | -1.28 | 2.44  | -0.50 |
| 0.38  | -0.16 | -0.77 | 1.91  | -0.36 | -0.38 |
| -0.84 | -0.90 | -0.45 | 0.47  | -0.50 | -0.08 |
| -1.13 | -0.21 | 0.81  | -0.50 | -0.61 | -0.46 |
| -0.49 | -0.56 | -0.19 | 1.46  | -0.34 | -0.05 |
| 1.90  | -0.59 | -1.30 | -1.02 | 1.18  | 0.58  |
| -0.32 | 0.18  | 0.66  | -1.10 | -0.56 | 1.00  |
| -0.30 | 0.25  | 1.08  | -0.75 | -0.49 | 2.00  |
| -0.26 | 0.25  | -0.82 | 0.43  | -0.60 | 0.67  |
| -1.08 | 0.03  | -0.27 | -1.20 | -0.77 | -0.94 |
| 0.02  | -0.64 | 0.10  | 0.07  | -0.06 | 0.54  |
| 0.60  | -1.46 | -1.17 | -0.83 | 2.27  | 1.55  |
| 0.73  | 0.18  | -0.09 | 1.32  | -0.58 | 0.32  |
| 0.04  | 0.80  | 4.93  | 3.26  | -0.71 | 6.21  |
| 0.48  | 3.37  | 16.43 | 3.64  | -0.65 | 6.75  |
| -0.57 | 0.31  | 0.50  | 0.34  | -0.53 | -0.07 |
| 0.51  | -0.10 | 0.85  | -0.84 | 1.26  | 0.59  |
| -0.29 | 3.01  | 2.29  | 1.95  | -0.56 | -0.57 |
| -0.48 | 1.26  | 3.86  | 2.12  | -0.78 | 2.37  |
| 1.04  | -0.61 | -0.56 | -0.07 | -0.12 | -0.23 |
| 0.16  | 1.21  | 2.49  | 0.49  | -0.61 | -0.24 |
| 0.18  | -0.49 | 0.70  | -0.59 | -0.11 | -0.34 |
| 0.61  | -0.41 | 0.02  | 0.32  | -0.59 | -0.36 |
| 0.78  | -0.45 | -0.41 | -0.04 | 0.00  | -0.33 |
| -0.70 | 0.75  | -0.16 | 0.43  | -0.65 | 0.48  |
| -0.80 | 0.05  | -0.24 | -0.62 | -0.55 | 0.50  |
| 0.54  | 0.03  | -0.11 | -0.38 | -0.12 | 0.01  |
| -0.51 | 1.40  | 0.60  | -0.36 | -0.64 | -0.73 |
| -0.79 | 0.02  | -0.44 | 0.29  | -0.63 | 0.14  |
| -0.38 | -0.26 | -0.39 | -0.43 | -0.11 | -0.59 |
| 0.51  | -1.38 | -1.70 | -1.05 | 5.38  | -0.62 |
| -0.41 | 0.58  | 0.32  | 3.02  | -0.60 | -0.21 |
| 1.07  | 1.25  | 0.94  | 1.40  | 0.34  | -0.30 |
| 1.65  | 0.18  | -0.87 | 1.84  | 0.19  | 0.07  |
| -0.05 | -1.48 | -1.50 | -1.26 | 6.59  | -0.65 |
| -0.97 | -0.75 | 0.17  | -0.24 | -0.64 | -0.34 |
| -0.79 | -0.29 | -0.26 | 0.05  | -0.48 | -0.65 |
| -0.65 | -1.23 | -1.46 | -0.63 | 0.21  | -0.63 |
| -0.01 | -0.44 | 3.41  | 0.13  | -0.53 | -0.61 |
| -0.33 | -1.61 | -1.66 | -1.24 | 0.14  | 0.83  |
| -0.22 | -0.14 | 2.48  | 2.62  | -0.81 | -0.59 |
| -0.28 | -0.42 | 1.23  | 1.64  | -0.44 | 2.93  |
| 1.22  | -0.11 | 1.63  | 1.60  | -0.29 | 1.23  |
| -0.66 | -0.51 | 0.27  | -0.22 | -0.66 | -0.18 |
| 2.93  | -1.41 | 2.19  | -0.22 | 0.38  | -0.93 |
| -0.10 | -1.08 | -0.61 | -1.00 | -0.12 | -0.65 |
| 1.72  | -0.87 | -0.20 | -0.43 | 1.49  | -0.33 |
| -1.15 | 4.27  | 12.40 | 5.57  | -0.69 | 15.97 |
| 1.15  | -0.16 | -0.34 | -0.71 | 0.96  | -0.67 |
| -0.02 | 0.05  | -0.07 | 1.08  | 0.04  | 0.37  |
| -0.44 | 2.58  | 2.09  | 0.60  | -0.41 | -0.97 |
| -0.28 | -1.27 | -1.25 | -0.85 | 0.68  | 1.99  |

|       |       |       |       |       |       |
|-------|-------|-------|-------|-------|-------|
| 1.02  | -0.68 | -1.32 | -0.80 | 0.04  | -0.27 |
| -0.77 | -0.41 | -0.41 | -0.26 | -0.65 | -0.05 |
| 0.01  | -0.46 | -0.97 | -0.24 | -0.37 | -0.33 |
| 0.45  | 0.52  | 1.84  | 1.07  | -0.57 | -0.90 |
| 1.57  | -1.14 | -0.83 | -0.29 | 1.76  | -0.08 |
| 0.43  | -1.51 | -1.50 | -1.37 | 4.35  | -0.69 |
| 0.03  | 0.01  | 0.08  | 0.08  | -0.49 | 0.25  |
| 0.46  | -0.49 | -0.42 | -0.03 | -0.48 | -0.20 |
| -0.61 | -0.61 | 0.37  | -0.46 | -0.57 | -0.60 |
| 0.55  | 0.12  | -0.43 | -0.05 | 1.26  | -0.15 |
| 0.06  | -0.16 | -0.74 | 0.30  | -0.44 | 0.34  |
| 0.04  | -0.80 | -0.07 | -0.15 | 1.60  | -0.96 |
| -0.86 | 0.63  | 0.39  | 0.11  | -0.62 | -0.43 |
| -0.48 | 0.98  | 0.59  | 0.78  | -0.63 | -0.24 |
| -0.68 | -0.75 | -0.98 | -0.64 | 0.06  | -0.73 |
| -0.69 | -1.33 | -0.73 | 0.60  | -0.15 | 0.44  |

|      |      |      |      |          |       |
|------|------|------|------|----------|-------|
| 1    | 1    | -1   | 0    | 2.12E-01 | -0.15 |
| 0.00 | 0.00 | 0.00 | 0.00 | 0.00     | 0.00  |
| 1.00 | 1.00 | 1.00 | 1.00 | 1.00     | 1.00  |
| 0.46 | 0.39 | 0.98 | 0.81 | 0.96     | 0.90  |

| 96        | 97            | 98                     | 99                 | 100          | 101              |
|-----------|---------------|------------------------|--------------------|--------------|------------------|
| AAGGAGCTC | TCCGGTTCTCAGC | CCGCACTGTGGGTACTTGCTGC | TGCCCTGTGGACTCAGT' | TAGTGCAATATT | GCCCCCTGGGCCTATC |
| miR-28-5p | miR-671-3p    | miR-106b-3p            | miR-146b-3p        | miR-454-3p   | miR-331-3p       |
| 28163     | 28118         | 27350                  | 27199              | 2.68E+04     | 26325.00         |
| -0.76     | -1.03         | 0.24                   | -0.05              | -0.69        | 4.12             |
| 0.69      | -0.76         | 0.97                   | 2.39               | -0.81        | -1.02            |
| -0.20     | -1.30         | -1.08                  | -0.05              | -0.15        | 0.00             |
| -0.78     | -1.25         | -0.77                  | -0.45              | -0.60        | -0.06            |
| 1.80      | 1.93          | -1.91                  | 1.49               | -0.03        | 0.08             |
| -0.03     | 2.02          | -0.53                  | -1.03              | -0.48        | -0.99            |
| -0.24     | 1.44          | 0.01                   | -0.60              | -0.61        | -0.14            |
| -0.50     | 1.26          | 2.00                   | -0.43              | -0.68        | -0.46            |
| -0.88     | -0.98         | -1.08                  | -1.26              | -0.41        | -0.51            |
| -0.73     | -1.16         | -1.09                  | -1.14              | 0.65         | -0.14            |
| 0.54      | -0.71         | -1.32                  | 0.08               | 0.26         | -0.59            |
| -0.10     | 0.50          | -0.10                  | -0.45              | -0.68        | -0.95            |
| 3.20      | -0.51         | -0.40                  | -1.03              | 3.65         | -0.08            |
| -0.81     | 0.18          | 0.69                   | 0.04               | -0.62        | 0.11             |
| -0.33     | -0.15         | -0.11                  | -0.85              | 0.82         | 0.56             |
| 1.85      | 0.04          | -0.05                  | -0.77              | 1.32         | -0.43            |
| -0.46     | 0.15          | 0.29                   | 0.98               | -0.62        | 0.47             |
| 0.08      | -1.06         | 1.93                   | -0.80              | 0.04         | 1.30             |
| -0.02     | -0.14         | 0.37                   | 0.03               | -0.10        | 1.24             |
| 1.51      | -0.77         | -0.49                  | -0.75              | 1.58         | -0.39            |
| -0.39     | 0.58          | -0.20                  | 0.13               | -0.24        | -0.77            |
| -0.67     | 0.92          | 1.40                   | 1.01               | -0.70        | -0.27            |
| -0.41     | 0.85          | 1.59                   | 1.26               | -0.55        | -0.11            |
| -0.58     | 0.84          | 0.76                   | 0.74               | -0.65        | -0.20            |
| -0.60     | 0.69          | 0.34                   | 0.24               | -0.50        | -0.59            |
| -0.69     | -0.56         | -0.61                  | 2.14               | -0.44        | 0.03             |
| -0.48     | -1.03         | -0.86                  | -0.86              | 1.26         | -0.23            |
| 0.93      | -1.52         | -1.86                  | -1.28              | 2.44         | -0.50            |

|       |       |       |       |       |       |
|-------|-------|-------|-------|-------|-------|
| 0.38  | -0.16 | -0.77 | 1.91  | -0.36 | -0.38 |
| -0.84 | -0.90 | -0.45 | 0.47  | -0.50 | -0.08 |
| -1.13 | -0.21 | 0.81  | -0.50 | -0.61 | -0.46 |
| -0.49 | -0.56 | -0.19 | 1.46  | -0.34 | -0.05 |
| 1.90  | -0.59 | -1.30 | -1.02 | 1.18  | 0.58  |
| -0.32 | 0.18  | 0.66  | -1.10 | -0.56 | 1.00  |
| -0.30 | 0.25  | 1.08  | -0.75 | -0.49 | 2.00  |
| -0.26 | 0.25  | -0.82 | 0.43  | -0.60 | 0.67  |
| -1.08 | 0.03  | -0.27 | -1.20 | -0.77 | -0.94 |
| 0.02  | -0.64 | 0.10  | 0.07  | -0.06 | 0.54  |
| 0.60  | -1.46 | -1.17 | -0.83 | 2.27  | 1.55  |
| 0.73  | 0.18  | -0.09 | 1.32  | -0.58 | 0.32  |
| 0.04  | 0.80  | 4.93  | 3.26  | -0.71 | 6.21  |
| 0.48  | 3.37  | 16.43 | 3.64  | -0.65 | 6.75  |
| -0.57 | 0.31  | 0.50  | 0.34  | -0.53 | -0.07 |
| 0.51  | -0.10 | 0.85  | -0.84 | 1.26  | 0.59  |
| -0.29 | 3.01  | 2.29  | 1.95  | -0.56 | -0.57 |
| -0.48 | 1.26  | 3.86  | 2.12  | -0.78 | 2.37  |
| 1.04  | -0.61 | -0.56 | -0.07 | -0.12 | -0.23 |
| 0.16  | 1.21  | 2.49  | 0.49  | -0.61 | -0.24 |
| 0.18  | -0.49 | 0.70  | -0.59 | -0.11 | -0.34 |
| 0.61  | -0.41 | 0.02  | 0.32  | -0.59 | -0.36 |
| 0.78  | -0.45 | -0.41 | -0.04 | 0.00  | -0.33 |
| -0.70 | 0.75  | -0.16 | 0.43  | -0.65 | 0.48  |
| -0.80 | 0.05  | -0.24 | -0.62 | -0.55 | 0.50  |
| 0.54  | 0.03  | -0.11 | -0.38 | -0.12 | 0.01  |
| -0.51 | 1.40  | 0.60  | -0.36 | -0.64 | -0.73 |
| -0.79 | 0.02  | -0.44 | 0.29  | -0.63 | 0.14  |
| -0.38 | -0.26 | -0.39 | -0.43 | -0.11 | -0.59 |
| 0.51  | -1.38 | -1.70 | -1.05 | 5.38  | -0.62 |
| -0.41 | 0.58  | 0.32  | 3.02  | -0.60 | -0.21 |
| 1.07  | 1.25  | 0.94  | 1.40  | 0.34  | -0.30 |
| 1.65  | 0.18  | -0.87 | 1.84  | 0.19  | 0.07  |
| -0.05 | -1.48 | -1.50 | -1.26 | 6.59  | -0.65 |
| -0.97 | -0.75 | 0.17  | -0.24 | -0.64 | -0.34 |
| -0.79 | -0.29 | -0.26 | 0.05  | -0.48 | -0.65 |
| -0.65 | -1.23 | -1.46 | -0.63 | 0.21  | -0.63 |
| -0.01 | -0.44 | 3.41  | 0.13  | -0.53 | -0.61 |
| -0.33 | -1.61 | -1.66 | -1.24 | 0.14  | 0.83  |
| -0.22 | -0.14 | 2.48  | 2.62  | -0.81 | -0.59 |
| -0.28 | -0.42 | 1.23  | 1.64  | -0.44 | 2.93  |
| 1.22  | -0.11 | 1.63  | 1.60  | -0.29 | 1.23  |
| -0.66 | -0.51 | 0.27  | -0.22 | -0.66 | -0.18 |
| 2.93  | -1.41 | 2.19  | -0.22 | 0.38  | -0.93 |
| -0.10 | -1.08 | -0.61 | -1.00 | -0.12 | -0.65 |
| 1.72  | -0.87 | -0.20 | -0.43 | 1.49  | -0.33 |
| -1.15 | 4.27  | 12.40 | 5.57  | -0.69 | 15.97 |
| 1.15  | -0.16 | -0.34 | -0.71 | 0.96  | -0.67 |
| -0.02 | 0.05  | -0.07 | 1.08  | 0.04  | 0.37  |
| -0.44 | 2.58  | 2.09  | 0.60  | -0.41 | -0.97 |
| -0.28 | -1.27 | -1.25 | -0.85 | 0.68  | 1.99  |
| 1.02  | -0.68 | -1.32 | -0.80 | 0.04  | -0.27 |
| -0.77 | -0.41 | -0.41 | -0.26 | -0.65 | -0.05 |
| 0.01  | -0.46 | -0.97 | -0.24 | -0.37 | -0.33 |
| 0.45  | 0.52  | 1.84  | 1.07  | -0.57 | -0.90 |
| 1.57  | -1.14 | -0.83 | -0.29 | 1.76  | -0.08 |
| 0.43  | -1.51 | -1.50 | -1.37 | 4.35  | -0.69 |
| 0.03  | 0.01  | 0.08  | 0.08  | -0.49 | 0.25  |
| 0.46  | -0.49 | -0.42 | -0.03 | -0.48 | -0.20 |



|       |       |       |       |           |       |
|-------|-------|-------|-------|-----------|-------|
| -0.61 | -0.61 | 0.37  | -0.46 | -0.57     | -0.60 |
| 0.55  | 0.12  | -0.43 | -0.05 | 1.26      | -0.15 |
| 0.06  | -0.16 | -0.74 | 0.30  | -0.44     | 0.34  |
| 0.04  | -0.80 | -0.07 | -0.15 | 1.60      | -0.96 |
| -0.86 | 0.63  | 0.39  | 0.11  | -0.62     | -0.43 |
| -0.48 | 0.98  | 0.59  | 0.78  | -0.63     | -0.24 |
| -0.68 | -0.75 | -0.98 | -0.64 | 0.06      | -0.73 |
| -1    | -1    | -1    | 1     | -1.49E-01 | 0.44  |

---

| 96                  | 97            | 98                     | 99                | 100          | 101             |
|---------------------|---------------|------------------------|-------------------|--------------|-----------------|
| 37                  | 28            | 8                      | 79                | 5            | 22              |
| CTAGACTGA           | TTTGGCAATGGTA | AAACCGTTACCATTACTGAGTT | TGCGGGGCTAGGGCTAA | AACATTCAACGC | CAAAGTGCTGTTCGT |
| miR-151a-miR-182-5p | miR-451a      |                        | miR-744-5p        | miR-181a-5p  | miR-93-5p       |
| 393199              | 501331        | 3762724                | 56410             | 8658137      | 679306          |
| -0.32               | -0.73         | -0.50                  | -0.65             | -0.18        | 1.24            |
| 2.84                | 2.95          | -0.26                  | -1.18             | -1.73        | -1.25           |
| -0.21               | 0.51          | 0.10                   | -1.00             | -0.76        | 2.48            |
| -0.91               | -0.18         | -0.40                  | -0.95             | -1.23        | 1.64            |
| 0.42                | -0.74         | -0.49                  | 1.81              | -0.08        | -0.94           |
| -0.66               | -0.97         | -0.60                  | 0.20              | -0.44        | -1.32           |
| -0.55               | -0.81         | -0.58                  | 1.91              | 1.03         | 0.26            |
| -0.95               | -0.91         | -0.56                  | 0.69              | 0.65         | -0.80           |
| 0.50                | 0.19          | -0.23                  | -1.00             | -1.26        | -0.23           |
| 1.26                | 1.05          | -0.03                  | -1.21             | -1.64        | 0.26            |
| 2.90                | 1.63          | 0.30                   | -0.98             | -1.00        | -0.93           |
| -0.74               | -0.90         | -0.54                  | 1.97              | 0.27         | -1.03           |
| 0.28                | -0.11         | 2.47                   | -0.38             | -0.24        | 0.95            |
| -0.71               | -0.82         | -0.53                  | 0.36              | 0.88         | -0.38           |
| -0.40               | 0.37          | -0.08                  | -0.34             | -0.49        | 1.27            |
| 0.15                | 0.30          | 0.07                   | -0.28             | -0.42        | -0.06           |
| -0.80               | -0.76         | -0.52                  | -0.15             | 1.77         | 0.22            |
| -0.04               | -0.15         | 0.68                   | 1.42              | 0.05         | 1.62            |
| 0.81                | 0.57          | 0.02                   | -0.88             | 0.11         | -0.44           |
| -0.23               | 0.84          | 3.77                   | -0.79             | -0.29        | -0.54           |
| -0.32               | 0.18          | -0.51                  | -0.75             | 0.23         | -0.27           |
| -0.77               | -0.60         | -0.56                  | 1.07              | 1.38         | -0.39           |
| -0.57               | -0.56         | -0.47                  | 0.67              | 1.21         | -0.20           |
| -0.90               | -0.80         | -0.54                  | 0.57              | 1.19         | -0.71           |
| 0.16                | -0.74         | -0.52                  | 0.10              | 0.34         | -1.27           |
| -0.52               | -0.77         | -0.49                  | 0.62              | 1.77         | 0.19            |
| 0.32                | 1.97          | 0.97                   | -0.86             | -1.13        | 0.61            |
| 0.29                | 1.52          | 5.14                   | -1.22             | -1.79        | -0.21           |
| 1.54                | -0.11         | -0.37                  | -1.10             | -1.47        | -0.53           |
| 1.58                | 1.28          | -0.14                  | -1.14             | -1.71        | 0.28            |
| 1.04                | 0.47          | -0.53                  | -1.10             | -1.76        | 1.77            |
| 6.29                | 4.08          | 0.53                   | -1.26             | -1.76        | 0.04            |
| 1.58                | -0.61         | 0.31                   | 0.42              | -1.26        | -1.04           |
| -0.84               | -0.58         | -0.47                  | 0.45              | 1.07         | 0.09            |
| -0.26               | 0.02          | 0.14                   | -0.20             | 0.40         | 0.76            |
| -0.68               | -0.99         | -0.52                  | -0.06             | 0.31         | -0.65           |
| -1.17               | -1.00         | -0.60                  | 0.37              | -1.01        | -1.72           |
| 0.75                | 0.00          | 0.00                   | -1.13             | 0.48         | 0.49            |
| 1.50                | 0.77          | 10.00                  | -1.07             | 0.26         | 2.86            |

|       |       |       |   |       |       |       |
|-------|-------|-------|---|-------|-------|-------|
| -0.52 | -0.76 | -0.41 |   | -0.29 | 2.00  | -0.56 |
| -0.75 | -0.46 | -0.41 |   | 1.74  | 2.23  | -1.02 |
| 0.05  | -0.36 | 0.15  |   | 3.41  | 4.38  | -0.94 |
| -0.61 | -0.84 | -0.55 |   | 0.19  | 0.78  | -0.17 |
| 0.01  | 0.25  | 0.38  |   | -0.68 | -0.78 | 1.30  |
| -0.04 | -0.78 | -0.51 | ↓ | 0.48  | 0.14  | -1.23 |
| -1.03 | -0.79 | -0.51 | ↓ | 1.62  | 3.61  | -1.70 |
| -0.11 | -0.36 | -0.04 |   | -0.90 | -0.03 | -0.60 |
| -0.17 | -0.60 | -0.46 |   | 0.18  | 1.96  | -0.63 |
| -0.39 | 0.17  | 0.28  |   | -0.50 | 0.15  | -0.22 |
| -0.66 | -0.48 | -0.29 |   | -0.63 | 0.70  | -0.56 |
| -0.01 | -0.33 | 0.11  |   | -0.65 | 1.01  | -0.42 |
| -0.54 | -0.87 | -0.55 |   | 0.09  | -0.55 | -0.24 |
| -0.47 | -0.40 | -0.53 |   | -0.23 | -1.08 | 0.04  |
| -0.58 | -0.70 | -0.42 |   | 0.40  | -0.49 | 0.46  |
| -0.53 | -0.51 | -0.57 |   | -0.02 | -0.24 | -1.14 |
| -0.61 | -0.95 | -0.55 |   | -0.53 | -0.11 | -0.52 |
| -0.48 | -0.38 | -0.50 |   | -0.67 | -0.83 | -0.27 |
| -0.48 | 1.33  | 6.18  |   | -0.92 | -0.57 | 0.02  |
| -0.52 | -0.78 | -0.52 |   | 0.46  | 2.54  | 0.31  |
| 0.45  | -0.33 | -0.19 |   | 0.74  | 1.40  | 0.22  |
| 0.30  | -0.08 | -0.08 |   | 0.38  | 1.09  | -0.67 |
| -0.19 | 2.29  | 4.07  |   | -1.10 | -0.97 | 0.60  |
| -0.98 | -0.40 | -0.45 |   | -0.20 | 0.62  | -0.01 |
| -0.81 | -0.24 | -0.41 |   | -0.09 | -0.19 | -0.18 |
| -0.22 | -0.66 | 0.00  |   | -0.88 | -0.36 | 0.28  |
| -0.51 | 2.73  | -0.09 |   | 0.99  | 1.09  | 2.75  |
| 0.44  | 0.19  | 1.39  |   | -1.41 | -1.78 | 1.74  |
| 5.63  | 1.31  | -0.36 |   | -1.39 | -1.67 | 0.80  |
| 0.04  | 0.00  | -0.28 |   | 0.89  | 0.55  | 4.05  |
| 0.19  | 0.08  | -0.15 |   | 0.34  | 0.95  | 3.41  |
| -0.78 | -0.68 | -0.45 |   | -0.49 | -0.87 | 1.24  |
| 0.70  | 1.99  | -0.15 |   | -1.21 | -1.31 | -1.31 |
| -0.58 | 0.23  | -0.20 |   | -0.74 | -0.99 | 0.15  |
| -0.11 | 0.23  | 1.13  |   | -0.23 | -0.06 | 0.58  |
| -1.00 | -0.94 | -0.37 |   | 4.02  | 2.07  | -1.85 |
| -0.58 | -0.41 | -0.19 |   | 0.18  | -0.32 | -0.09 |
| 1.53  | 0.84  | -0.01 |   | -1.01 | -0.77 | -0.41 |
| 2.28  | 1.12  | -0.51 |   | -0.85 | -0.82 | -1.23 |
| 0.36  | -0.22 | 1.56  |   | -1.00 | -1.07 | 1.72  |
| -0.01 | 0.04  | 0.25  |   | -1.02 | -0.75 | -0.78 |
| -0.57 | -0.46 | -0.39 |   | -0.71 | -0.23 | -0.68 |
| -0.60 | -0.46 | -0.17 |   | -0.84 | -0.18 | -0.43 |
| -0.87 | -0.89 | -0.47 |   | 0.87  | 0.81  | -1.32 |
| -0.30 | 0.61  | 7.12  |   | -0.90 | 0.29  | -0.58 |
| -0.46 | 1.49  | 8.65  |   | -1.28 | -1.15 | -0.40 |
| 0.15  | -0.92 | 0.18  |   | -0.48 | 0.16  | -0.99 |
| -0.63 | -0.67 | -0.35 |   | -0.64 | 0.27  | -0.36 |
| -0.68 | -0.21 | -0.45 |   | -0.99 | -0.10 | -0.29 |
| -0.09 | 0.40  | 0.49  |   | -0.73 | -0.51 | -0.14 |
| -0.63 | -0.66 | -0.37 |   | -0.32 | -0.44 | -0.45 |
| -0.47 | 3.43  | 0.60  |   | -0.62 | -0.33 | 0.38  |
| -0.81 | -0.79 | -0.56 |   | -1.01 | -0.42 | -0.40 |
| -0.94 | -0.86 | -0.55 |   | 0.54  | 1.73  | -0.29 |
| 0.53  | 0.41  | -0.31 |   | -1.06 | -0.45 | 0.40  |
| 0.60  | 0.69  | -0.14 |   | -1.04 | 0.16  | 1.86  |
| 0.58  | 0.60  | 0.62  |   | 0.65  | 0.66  | 0.67  |
| 0.53  | 1.00  | 1.00  |   | 1.00  | 0.45  | 0.78  |











































































































































































reselects

typical UC  
43.19

typical NP  
33.63

typical P  
18.79

sd/ave

- 1.23
- 0.88
- 1.22
- 0.89
- 0.84
- 0.87
- 1.54

|         |
|---------|
| Student |
| trials  |
| 1000    |
| 100     |
| 10      |

no relabeling\_but\_resele

random relabeling, random selections, then count c

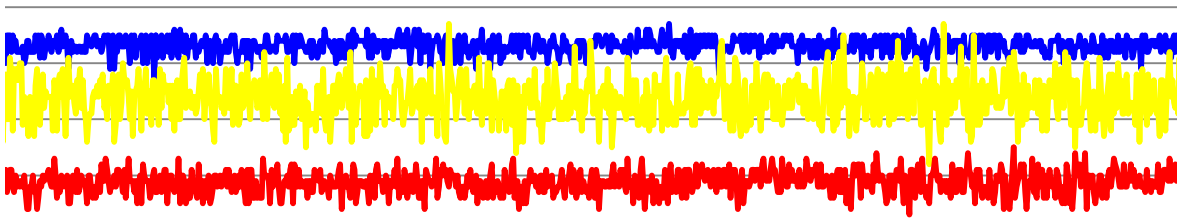

1000 trials

- 1.14
- 1.11
- 1.27
- 1.53
- 1.32
- 1.02
- 1.00
- 1.20
- 0.95
- 0.86
- 1.15
- 0.89
- 1.84
- 3.62
- 0.96
- 0.92
- 1.06
- 1.08
- 1.12
- 1.30
- 1.06
- 0.88
- 0.86
- 1.64
- 0.77

0.89  
1.08  
0.97  
2.91  
2.11  
1.00  
1.65  
0.98  
1.18  
1.11  
2.94  
1.15  
1.16  
0.90  
0.93  
1.21  
1.23  
1.90  
3.74  
0.94  
1.29  
1.96  
1.55  
1.48  
1.31  
0.88  
0.92  
1.87  
1.18  
1.16  
1.15  
1.20  
0.90  
0.97  
1.25  
1.07  
0.90  
0.97  
2.90  
1.32  
1.04  
0.80  
1.60  
1.13  
1.07  
0.91  
3.35  
0.97  
1.38  
2.24  
1.65  
0.93  
0.90  
0.88  
1.98  
1.23  
1.01  
0.83  
1.03



1.29  
1.66  
0.99  
1.00  
1.71  
1.44  
1.31  
1.00  
1.21  
1.33  
1.02  
0.97  
1.01  
1.37  
1.37  
1.02  
0.89  
0.96  
1.49  
1.41  
2.83  
0.92  
0.84  
1.05  
0.96  
1.07  
1.53  
1.19  
1.11  
1.03  
1.88  
1.03  
0.90  
0.99  
1.08  
0.95  
0.81  
1.18  
1.00  
0.98  
2.30  
1.04  
0.96  
1.27  
0.83  
1.13  
1.59  
1.25  
1.23  
0.93  
1.53  
0.96  
1.33  
0.93  
0.89  
1.08  
2.93  
1.06  
0.92

selection criteria:

|      | min | max |
|------|-----|-----|
| 1.37 | 4   | 685 |
| 1.37 | 4   | 685 |
| 1.02 | 2   | 548 |
| 0.89 | 1   | 399 |
| 0.96 | 0   | 518 |
| 1.49 | 0   | 664 |
| 1.41 | 3   | 657 |
| 2.83 |     |     |
| 0.92 | 2   | 443 |
| 0.84 |     |     |
| 1.05 | 0   | 434 |

2.03  
1.79  
0.81  
0.91  
1.63  
1.96  
0.91  
1.54  
1.09  
0.83  
1.46  
2.12  
1.16  
1.27  
1.09  
1.21  
1.06  
0.96  
1.91  
1.14  
1.41  
0.98  
0.84  
1.90  
1.39  
1.21  
1.25  
1.72  
2.33  
1.17  
1.00  
0.93  
0.97  
2.57  
0.97  
1.40  
1.21  
1.13  
0.97  
0.91  
1.08  
1.60  
1.27  
1.00  
1.05  
1.26  
0.90  
1.03  
1.34  
1.50  
0.97  
1.17  
1.00  
1.11  
1.23  
2.97  
1.03  
1.44  
1.01

1.09  
1.24  
1.45  
0.80  
0.96  
0.81  
0.89  
1.14  
1.54  
1.03  
2.39  
0.97  
1.17  
1.06  
1.03  
2.15  
1.69  
0.94  
1.33  
1.47  
1.62  
1.06  
1.06  
1.22  
1.02  
1.18  
1.40  
1.08  
1.09  
1.34  
1.10  
1.18  
1.88  
1.59  
1.15  
1.22  
3.15  
1.00  
2.27  
1.19  
1.10  
2.33  
1.08  
1.14  
1.48  
0.83  
3.80  
1.07  
1.06  
1.11  
1.09  
1.18  
2.32  
0.91  
1.74  
3.02  
0.97  
1.35  
1.03

1.16  
0.93  
1.21  
0.92  
0.95  
0.94  
1.72  
1.29  
2.42  
2.07  
1.34  
1.11  
1.49  
1.42  
1.15  
1.60  
1.06  
1.36  
1.15  
1.57  
1.26  
0.97  
1.19  
0.87  
1.35  
1.21  
1.17  
1.09  
0.99  
1.25  
0.95  
1.91  
2.09  
1.00  
1.22  
1.15  
1.30  
1.16  
1.25  
1.09  
1.89  
1.13  
1.28  
1.15  
1.22  
1.44  
0.87  
1.12  
0.93  
1.03  
1.12  
2.16  
1.22  
1.48  
1.36  
1.23  
1.00  
2.56  
1.10

0.82  
0.94  
1.29  
1.08  
0.98  
1.28  
1.02  
1.88  
1.45  
1.03  
0.99  
1.33  
1.15  
3.28  
1.05  
1.38  
1.63  
1.22  
2.10  
1.17  
1.79  
1.59  
0.86  
0.86  
1.20  
1.02  
2.30  
3.34  
1.39  
1.30  
0.98  
1.15  
1.33  
1.12  
1.84  
1.30  
1.54  
1.21  
0.98  
1.18  
1.70  
1.11  
1.34  
1.16  
0.88  
1.39  
1.36  
1.05  
1.75  
2.30  
1.03  
1.12  
1.94  
1.39  
1.11  
1.39  
1.37  
0.97  
1.85

1.43  
1.21  
1.91  
1.87  
1.08  
1.34  
1.22  
2.12  
1.19  
1.06  
2.47  
2.76  
4.26  
1.74  
1.21  
1.30  
1.03  
0.96  
2.97  
1.78  
1.05  
2.59  
1.60  
1.19  
1.16  
2.75  
1.45  
1.67  
1.40  
1.46  
2.98  
1.37  
0.95  
1.35  
2.11  
1.47  
1.16  
1.12  
1.22  
1.36  
2.55  
1.23  
0.82  
1.79  
1.29  
1.59  
2.71  
1.18  
0.99  
1.14  
1.18  
1.75  
1.45  
2.03  
1.60  
1.28  
1.42  
1.51  
1.22

1.36  
1.17  
1.06  
1.47  
1.75  
2.55  
1.32  
2.68  
1.45  
1.76  
2.16  
1.62  
2.36  
1.73  
1.60  
1.41  
1.29  
3.67  
2.96  
1.62  
1.54  
2.64  
2.75  
0.95  
1.36  
1.33  
1.59  
1.43  
2.96  
1.68  
2.62  
1.25  
1.65  
1.54  
1.37  
1.31  
1.76  
2.26  
1.48  
1.12  
1.69  
1.37  
1.28  
1.10  
1.56  
1.51  
1.54  
1.59  
1.15  
1.14  
1.48  
1.46  
1.82  
1.64  
1.37  
1.90  
1.64  
1.24  
1.49

2.18  
1.13  
2.18  
1.78  
2.01  
1.66  
1.32  
2.28  
1.54  
2.15  
1.22  
1.15

0.22











































| 1.00     | 2                       | 3         | 4                        |
|----------|-------------------------|-----------|--------------------------|
| XX UCs,  | counts shown are exact  | 0         | each miR ranked by total |
| 0.00     | 0                       | 0         | 0                        |
| index ty | total of totals of =100 | 139641984 | total all miRNA reads =1 |
| 1.00     | UC                      | A_11      | 479320                   |
| 2.00     | UC                      | A_16      | 21319                    |
| 3.00     | UC                      | A_2       | 1102300                  |
| 4.00     | UC                      | A_4       | 1969971                  |
| 5.00     | UC                      | B_29      | 71054                    |
| 6.00     | UC                      | B_32      | 356562                   |
| 7.00     | UC                      | B_34      | 1363063                  |
| 8.00     | UC                      | C_1       | 824884                   |
| 9.00     | UC                      | C_40      | 2206918                  |
| 10.00    | UC                      | C_41      | 623719                   |
| 11.00    | UC                      | C_42      | 774447                   |
| 12.00    | UC                      | C_44      | 627333                   |
| 13.00    | UC                      | C_46      | 2772220                  |
| 14.00    | UC                      | C_47      | 1217409                  |
| 15.00    | UC                      | D_16      | 4032681                  |
| 16.00    | UC                      | D_17      | 1739788                  |
| 17.00    | UC                      | D_18      | 1227867                  |
| 18.00    | UC                      | D_36      | 121631                   |
| 19.00    | UC                      | D_4       | 2029037                  |
| 20.00    | UC                      | E_47      | 1734052                  |
| 21.00    | UC                      | F_43      | 1026638                  |
| 22.00    | UC                      | F_6       | 1873959                  |
| 23.00    | UC                      | F_7       | 1687678                  |
| 24.00    | UC                      | F_8       | 1238990                  |
| 25.00    | UC                      | G_33      | 121924                   |
| 26.00    | UC                      | G_34      | 416015                   |
| 27.00    | UC                      | G_8       | 1782397                  |
| 1.00     | CHR_NP                  | A_1       | 2570804                  |
| 2.00     | CHR_NP                  | A_13      | 371228                   |
| 3.00     | CHR_NP                  | A_14      | 359180                   |
| 4.00     | CHR_NP                  | A_15      | 111957                   |
| 5.00     | CHR_NP                  | A_17      | 117100                   |
| 6.00     | CHR_NP                  | B_30      | 148505                   |
| 7.00     | CHR_NP                  | B_33      | 1922117                  |
| 8.00     | CHR_NP                  | C_2       | 685397                   |
| 9.00     | CHR_NP                  | C_37      | 2915691                  |
| 10.00    | CHR_NP                  | C_38      | 932164                   |
| 11.00    | CHR_NP                  | C_39      | 148130                   |
| 12.00    | CHR_NP                  | C_43      | 2018570                  |
| 13.00    | CHR_NP                  | C_48      | 2072241                  |
| 14.00    | CHR_NP                  | D_10      | 727386                   |
| 15.00    | CHR_NP                  | D_12      | 206047                   |
| 16.00    | CHR_NP                  | D_13      | 2758841                  |
| 17.00    | CHR_NP                  | D_14      | 2173631                  |
| 18.00    | CHR_NP                  | D_3       | 852941                   |
| 19.00    | CHR_NP                  | D_9       | 239935                   |
| 20.00    | CHR_NP                  | E_20      | 1893208                  |
| 21.00    | CHR_NP                  | E_29      | 1240451                  |
| 22.00    | CHR_NP                  | E_4       | 2304775                  |
| 23.00    | CHR_NP                  | E_5       | 1597470                  |

|       |        |      |         |
|-------|--------|------|---------|
| 24.00 | CHR_NP | E_6  | 1583268 |
| 25.00 | CHR_NP | F_1  | 2592561 |
| 26.00 | CHR_NP | F_35 | 3565545 |
| 27.00 | CHR_NP | F_36 | 2585170 |
| 28.00 | CHR_NP | F_37 | 976547  |
| 29.00 | CHR_NP | F_38 | 1738984 |
| 30.00 | CHR_NP | F_39 | 1856730 |
| 31.00 | CHR_NP | G_3  | 2304707 |
| 32.00 | CHR_NP | G_30 | 924323  |
| 33.00 | CHR_NP | G_31 | 555209  |
| 34.00 | CHR_NP | G_32 | 358914  |
| 35.00 | CHR_NP | G_4  | 3926455 |
| 36.00 | CHR_NP | G_5  | 1257195 |
| 37.00 | CHR_NP | G_6  | 488065  |
| 38.00 | CHR_NP | G_7  | 1421920 |
| 1.00  | CHR_P  | A_10 | 492624  |
| 2.00  | CHR_P  | A_12 | 721119  |
| 3.00  | CHR_P  | A_18 | 27468   |
| 4.00  | CHR_P  | A_3  | 816795  |
| 5.00  | CHR_P  | A_5  | 972175  |
| 6.00  | CHR_P  | A_6  | 1468719 |
| 7.00  | CHR_P  | B_31 | 409595  |
| 8.00  | CHR_P  | C_4  | 1862148 |
| 9.00  | CHR_P  | C_45 | 4820581 |
| 10.00 | CHR_P  | D_11 | 198165  |
| 11.00 | CHR_P  | D_35 | 2718285 |
| 12.00 | CHR_P  | D_5  | 905697  |
| 13.00 | CHR_P  | D_6  | 128375  |
| 14.00 | CHR_P  | E_19 | 4686947 |
| 15.00 | CHR_P  | E_21 | 1336672 |
| 16.00 | CHR_P  | E_22 | 1032612 |
| 17.00 | CHR_P  | E_23 | 1495548 |
| 18.00 | CHR_P  | E_3  | 331698  |
| 19.00 | CHR_P  | E_46 | 1653485 |
| 20.00 | CHR_P  | E_48 | 7479891 |
| 21.00 | CHR_P  | E_7  | 1160935 |
| 22.00 | CHR_P  | E_8  | 2099567 |
| 23.00 | CHR_P  | E_9  | 1323600 |
| 24.00 | CHR_P  | F_40 | 3571995 |
| 25.00 | CHR_P  | F_41 | 3076499 |
| 26.00 | CHR_P  | F_42 | 1136044 |
| 27.00 | CHR_P  | F_44 | 2580829 |
| 28.00 | CHR_P  | F_9  | 1797912 |
| 29.00 | CHR_P  | G_10 | 999373  |
| 30.00 | CHR_P  | G_9  | 336028  |
| 0.00  | 0      | 0    | 0       |
| 0.00  | 0      | 0    | 0       |
| 0.00  | 0      | 0    | 0       |





rank 73  
percenti0.98

| 2     | 3     | 4   | 5     |       |
|-------|-------|-----|-------|-------|
| A_16  | A_2   | A_4 |       | B_29  |
| 0.08  |       |     |       |       |
| -0.04 | 0.66  |     |       |       |
| 0.21  | -0.07 |     | -0.29 |       |
| -0.14 | -0.29 |     | -0.05 | 0.04  |
| -0.34 | -0.47 |     | -0.16 | -0.08 |
| -0.10 | -0.41 |     | -0.07 | -0.14 |

|       |       |       |       |
|-------|-------|-------|-------|
| 0.32  | 0.42  | 0.34  | -0.11 |
| 0.36  | 0.37  | 0.30  | 0.06  |
| 0.39  | 0.10  | -0.18 | 0.08  |
| -0.19 | -0.31 | -0.03 | -0.10 |
| -0.21 | 0.08  | -0.03 | -0.09 |
| -0.09 | -0.32 | 0.00  | -0.11 |
| -0.14 | 0.46  | 0.30  | -0.26 |
| -0.23 | 0.08  | -0.22 | -0.07 |
| -0.33 | -0.24 | -0.11 | -0.14 |
| -0.30 | 0.15  | 0.09  | -0.22 |
| -0.03 | -0.12 | -0.18 | -0.21 |
| -0.08 | 0.20  | 0.06  | -0.23 |
| -0.02 | -0.01 | 0.17  | -0.18 |
| -0.31 | -0.41 | -0.20 | -0.18 |
| -0.34 | -0.36 | -0.13 | -0.13 |
| -0.22 | -0.34 | 0.00  | -0.12 |
| 0.34  | -0.18 | -0.28 | 0.49  |
| -0.16 | -0.18 | -0.35 | 0.27  |
| 0.03  | 0.42  | 0.13  | -0.29 |
| 0.02  | 0.27  | 0.15  | -0.18 |
| 0.23  | 0.04  | -0.02 | -0.13 |
| 0.47  | 0.22  | 0.20  | -0.20 |
| 0.42  | 0.08  | 0.14  | -0.02 |
| 0.45  | 0.15  | -0.03 | -0.10 |
| 0.25  | 0.20  | -0.11 | 0.67  |
| -0.23 | -0.32 | 0.00  | -0.13 |
| -0.12 | -0.16 | -0.03 | 0.05  |
| -0.16 | -0.27 | -0.10 | 0.04  |
| 0.05  | -0.08 | 0.26  | -0.17 |
| -0.13 | -0.08 | 0.01  | -0.16 |
| -0.13 | 0.11  | -0.02 | -0.13 |
| -0.20 | -0.34 | -0.36 | 0.13  |
| -0.12 | -0.32 | -0.18 | 0.00  |
| -0.18 | -0.26 | -0.18 | -0.02 |
| -0.20 | -0.41 | -0.29 | -0.05 |
| -0.19 | 0.01  | 0.01  | -0.18 |
| -0.03 | -0.47 | -0.32 | -0.09 |
| -0.13 | -0.35 | -0.19 | 0.03  |
| -0.17 | 0.01  | -0.22 | 0.07  |
| -0.31 | -0.46 | -0.39 | -0.15 |
| -0.21 | 0.04  | 0.01  | -0.14 |
| -0.28 | -0.19 | -0.18 | -0.03 |
| -0.28 | -0.07 | -0.25 | -0.13 |
| -0.07 | -0.26 | -0.24 | 0.00  |
| -0.02 | -0.07 | 0.02  | -0.02 |
| -0.26 | -0.07 | -0.19 | 0.22  |
| -0.12 | -0.28 | -0.02 | -0.14 |



|       |       |       |       |
|-------|-------|-------|-------|
| 0.04  | -0.10 | -0.06 | -0.01 |
| -0.07 | 0.05  | 0.03  | -0.06 |
| -0.06 | 0.21  | 0.09  | -0.17 |
| -0.11 | -0.22 | -0.27 | 0.14  |
| -0.07 | -0.03 | -0.33 | 0.40  |
| 0.06  | 0.00  | -0.33 | 0.61  |
| 0.00  | 0.36  | 0.16  | -0.19 |
| 0.05  | 0.07  | 0.12  | -0.13 |
| -0.05 | 0.14  | 0.09  | -0.06 |
| -0.06 | 0.54  | 0.26  | -0.14 |
| -0.15 | 0.17  | 0.32  | -0.41 |
| -0.01 | 0.54  | 0.46  | -0.23 |
| 0.61  | 0.09  | 0.00  | 0.12  |
| 0.01  | 0.43  | 0.39  | 0.22  |
| -0.12 | 0.33  | 0.17  | 0.14  |
| -0.17 | 0.17  | 0.64  | -0.41 |
| 0.02  | 0.02  | -0.02 | -0.10 |
| -0.04 | 0.60  | 0.66  | -0.15 |
| -0.13 | 0.14  | 0.08  | -0.03 |
| -0.14 | -0.24 | -0.14 | 0.02  |
| -0.37 | 0.09  | 0.03  | -0.17 |
| 0.24  | 0.01  | -0.15 | -0.04 |
| 0.24  | -0.13 | -0.21 | -0.16 |
| -0.16 | 0.40  | 0.14  | -0.05 |
| -0.08 | 0.15  | -0.20 | 0.06  |
| 0.03  | 0.09  | -0.04 | 0.08  |
| -0.08 | 0.09  | -0.09 | 0.23  |
| -0.25 | -0.50 | -0.34 | -0.06 |
| -0.05 | 0.08  | -0.03 | -0.17 |
| 0.00  | 0.23  | 0.15  | -0.17 |
| -0.19 | -0.22 | -0.32 | 0.00  |
| -0.30 | -0.08 | -0.13 | 0.01  |
| -0.06 | 0.20  | 0.20  | 0.15  |
| -0.12 | 0.14  | 0.04  | -0.26 |
| -0.14 | -0.04 | -0.17 | 0.18  |
| 0.00  | 0.26  | 0.15  | -0.16 |
| -0.12 | -0.25 | 0.08  | -0.29 |
| -0.41 | -0.33 | -0.12 | -0.18 |
| 0.06  | 0.18  | -0.02 | -0.21 |
| -0.02 | 0.19  | 0.10  | -0.18 |

|                                            |       |                         |                        |
|--------------------------------------------|-------|-------------------------|------------------------|
| 34                                         | 1     | 2                       | 3                      |
| 102                                        | 103   | 104                     | 105                    |
| CAGTGCA <del>A</del> AGGGGTGCTATCTGTGATTGA |       | TACCCTGTAGATCCGAATTTGTG | TGTAACAGCAACTCCATGTGGA |
| miR-130kmiR-342-5p                         |       | miR-10a-5p              | miR-194-5p             |
| ##### 2.60E+04                             |       | 25811                   | 25540                  |
| -1.01                                      | 0.47  | -0.49                   | -0.50                  |
| -2.02                                      | -1.27 | 4.54                    | 1.09                   |
| 0.01                                       | -0.50 | -0.12                   | 1.23                   |
| -0.74                                      | -0.89 | -0.20                   | 0.17                   |
| -0.64                                      | 1.39  | -0.01                   | -0.08                  |
| 0.55                                       | 1.06  | -0.31                   | -0.08                  |
| -0.75                                      | 0.53  | -0.52                   | -0.76                  |
| -0.71                                      | -0.48 | -0.61                   | -0.73                  |
| -1.10                                      | -1.25 | -0.31                   | -0.31                  |
| -1.20                                      | -0.68 | -0.03                   | 0.90                   |
| -0.03                                      | -0.54 | 1.44                    | 0.17                   |
| -1.43                                      | 2.99  | -0.46                   | -1.22                  |
| 1.17                                       | -0.39 | -0.33                   | 2.42                   |
| -0.90                                      | 0.06  | -0.52                   | -0.90                  |
| -0.34                                      | -0.67 | -0.42                   | -0.13                  |
| 1.65                                       | -0.05 | 0.50                    | 1.51                   |
| 0.94                                       | 0.32  | -0.37                   | -0.73                  |
| 1.53                                       | -0.47 | -0.21                   | 0.68                   |
| 1.22                                       | -0.87 | -0.17                   | -0.19                  |
| 0.92                                       | -0.85 | -0.29                   | 0.85                   |

|       |       |       |       |
|-------|-------|-------|-------|
| 0.42  | 0.02  | -0.48 | -0.14 |
| 0.53  | 0.40  | -0.26 | -1.30 |
| 1.29  | 0.67  | -0.28 | -0.92 |
| -0.50 | 1.27  | -0.54 | -0.82 |
| -0.16 | -0.57 | 0.38  | -1.17 |
| 0.61  | 1.44  | -0.10 | -0.88 |
| 0.71  | -1.13 | 0.18  | 1.85  |
| -0.59 | -1.04 | 0.45  | 8.06  |
| -0.22 | -0.04 | 0.29  | 1.27  |
| -1.33 | -1.27 | -0.07 | 0.76  |
| -1.54 | -1.36 | -0.21 | -0.56 |
| 0.11  | -1.30 | 1.08  | 2.25  |
| 0.17  | -0.41 | 0.73  | 1.82  |
| -1.22 | -1.09 | -0.57 | -0.71 |
| -1.11 | -0.93 | -0.50 | 1.25  |
| -0.28 | 1.26  | -0.35 | -0.90 |
| -1.58 | -0.25 | -0.67 | -1.26 |
| 0.10  | -0.68 | -0.26 | 1.43  |
| -0.53 | -0.64 | 0.43  | 0.76  |
| -0.10 | 0.68  | -0.09 | -0.49 |
| -1.16 | 3.48  | -0.59 | -1.05 |
| -0.32 | 13.87 | -0.39 | -0.98 |
| 0.23  | 0.03  | -0.33 | -0.94 |
| 0.26  | -1.02 | -0.26 | 1.76  |
| -0.40 | 0.08  | -0.43 | -0.39 |
| -1.07 | 5.20  | -0.65 | -0.94 |
| 3.27  | -0.58 | -0.25 | 0.16  |
| 1.53  | 0.21  | -0.45 | -0.77 |
| 0.95  | -0.80 | -0.44 | 0.47  |
| 1.47  | 0.00  | -0.45 | -0.61 |
| 1.40  | -0.46 | -0.29 | 0.45  |
| 1.56  | 0.24  | -0.43 | -1.04 |
| 1.66  | -0.88 | -0.40 | -0.95 |
| 1.87  | 0.22  | -0.22 | -0.39 |
| 0.37  | 0.27  | -0.47 | -0.86 |
| 1.43  | -0.41 | -0.45 | -0.88 |
| -0.19 | -0.31 | -0.28 | 0.17  |
| 0.44  | -0.59 | 0.72  | 1.99  |
| 1.03  | 1.55  | -0.23 | -1.09 |
| 2.11  | 1.19  | 0.01  | 0.51  |
| 0.31  | 1.42  | 0.61  | -0.33 |
| 0.84  | -1.03 | 0.09  | 2.90  |
| 0.09  | -0.46 | -0.39 | -1.18 |
| 0.35  | 0.77  | -0.26 | -0.55 |
| 1.18  | -0.82 | -0.27 | 0.15  |
| -1.80 | -0.42 | -0.11 | -0.94 |
| -0.14 | -0.86 | -0.45 | 2.71  |
| -1.52 | -1.35 | 1.23  | 0.09  |
| -0.46 | 0.17  | -0.01 | 0.49  |
| 0.53  | 0.06  | 0.18  | 1.91  |
| -0.93 | -0.63 | -0.40 | -0.10 |
| 2.17  | -1.04 | -0.34 | 4.86  |
| 0.17  | -0.56 | -0.35 | 0.52  |
| -0.85 | -0.28 | -0.15 | 3.26  |
| -1.79 | 9.27  | -0.70 | -1.53 |
| -0.15 | 0.48  | -0.42 | 0.03  |
| -0.37 | -0.66 | -0.31 | 0.42  |
| 0.94  | 0.54  | -0.17 | 1.24  |
| 0.65  | -1.02 | 0.36  | 0.53  |

|       |       |       |       |
|-------|-------|-------|-------|
| 4.04  | -0.93 | 0.20  | 0.33  |
| 2.05  | -1.03 | -0.30 | -0.53 |
| 2.34  | -0.25 | -0.16 | -0.49 |
| 0.81  | 1.02  | -0.54 | -0.56 |
| 0.65  | -0.24 | -0.01 | 1.47  |
| -0.16 | -1.20 | -0.23 | 2.20  |
| 1.18  | -0.47 | -0.41 | -0.19 |
| 1.92  | -0.43 | -0.08 | -0.47 |
| 0.47  | -0.35 | -0.54 | -0.20 |
| 2.20  | -0.85 | -0.41 | 0.87  |
| 1.93  | -0.21 | -0.37 | -0.39 |
| -0.78 | -0.69 | 0.83  | -0.85 |
| -0.42 | -0.65 | -0.51 | -0.73 |
| 1.07  | 0.37  | -0.36 | -0.84 |
| -0.45 | -1.25 | 0.62  | -0.52 |
| -0.03 | -0.03 | 0.07  | 0.65  |

|       |          |      |      |
|-------|----------|------|------|
| -0.52 | 2.72E-01 | 1    | 0    |
| 0.00  | 0.00     | 0.00 | 0.00 |
| 1.00  | 1.00     | 1.00 | 1.00 |
| 0.60  | 0.38     | 0.78 | 0.62 |

| 102                                        | 103   | 104                     | 105                    |
|--------------------------------------------|-------|-------------------------|------------------------|
| CAGTGCA <del>A</del> AGGGGTGCTATCTGTGATTGA |       | TACCCTGTAGATCCGAATTTGTG | TGTAACAGCAACTCCATGTGGA |
| miR-130kmiR-342-5p                         |       | miR-10a-5p              | miR-194-5p             |
| ##### 2.60E+04                             |       | 25811                   | 25540                  |
| -1.01                                      | 0.47  | -0.49                   | -0.50                  |
| -2.02                                      | -1.27 | 4.54                    | 1.09                   |
| 0.01                                       | -0.50 | -0.12                   | 1.23                   |
| -0.74                                      | -0.89 | -0.20                   | 0.17                   |
| -0.64                                      | 1.39  | -0.01                   | -0.08                  |
| 0.55                                       | 1.06  | -0.31                   | -0.08                  |
| -0.75                                      | 0.53  | -0.52                   | -0.76                  |
| -0.71                                      | -0.48 | -0.61                   | -0.73                  |
| -1.10                                      | -1.25 | -0.31                   | -0.31                  |
| -1.20                                      | -0.68 | -0.03                   | 0.90                   |
| -0.03                                      | -0.54 | 1.44                    | 0.17                   |
| -1.43                                      | 2.99  | -0.46                   | -1.22                  |
| 1.17                                       | -0.39 | -0.33                   | 2.42                   |
| -0.90                                      | 0.06  | -0.52                   | -0.90                  |
| -0.34                                      | -0.67 | -0.42                   | -0.13                  |
| 1.65                                       | -0.05 | 0.50                    | 1.51                   |
| 0.94                                       | 0.32  | -0.37                   | -0.73                  |
| 1.53                                       | -0.47 | -0.21                   | 0.68                   |
| 1.22                                       | -0.87 | -0.17                   | -0.19                  |
| 0.92                                       | -0.85 | -0.29                   | 0.85                   |
| 0.42                                       | 0.02  | -0.48                   | -0.14                  |
| 0.53                                       | 0.40  | -0.26                   | -1.30                  |
| 1.29                                       | 0.67  | -0.28                   | -0.92                  |
| -0.50                                      | 1.27  | -0.54                   | -0.82                  |
| -0.16                                      | -0.57 | 0.38                    | -1.17                  |
| 0.61                                       | 1.44  | -0.10                   | -0.88                  |
| 0.71                                       | -1.13 | 0.18                    | 1.85                   |
| -0.59                                      | -1.04 | 0.45                    | 8.06                   |

|       |       |       |       |
|-------|-------|-------|-------|
| -0.22 | -0.04 | 0.29  | 1.27  |
| -1.33 | -1.27 | -0.07 | 0.76  |
| -1.54 | -1.36 | -0.21 | -0.56 |
| 0.11  | -1.30 | 1.08  | 2.25  |
| 0.17  | -0.41 | 0.73  | 1.82  |
| -1.22 | -1.09 | -0.57 | -0.71 |
| -1.11 | -0.93 | -0.50 | 1.25  |
| -0.28 | 1.26  | -0.35 | -0.90 |
| -1.58 | -0.25 | -0.67 | -1.26 |
| 0.10  | -0.68 | -0.26 | 1.43  |
| -0.53 | -0.64 | 0.43  | 0.76  |
| -0.10 | 0.68  | -0.09 | -0.49 |
| -1.16 | 3.48  | -0.59 | -1.05 |
| -0.32 | 13.87 | -0.39 | -0.98 |
| 0.23  | 0.03  | -0.33 | -0.94 |
| 0.26  | -1.02 | -0.26 | 1.76  |
| -0.40 | 0.08  | -0.43 | -0.39 |
| -1.07 | 5.20  | -0.65 | -0.94 |
| 3.27  | -0.58 | -0.25 | 0.16  |
| 1.53  | 0.21  | -0.45 | -0.77 |
| 0.95  | -0.80 | -0.44 | 0.47  |
| 1.47  | 0.00  | -0.45 | -0.61 |
| 1.40  | -0.46 | -0.29 | 0.45  |
| 1.56  | 0.24  | -0.43 | -1.04 |
| 1.66  | -0.88 | -0.40 | -0.95 |
| 1.87  | 0.22  | -0.22 | -0.39 |
| 0.37  | 0.27  | -0.47 | -0.86 |
| 1.43  | -0.41 | -0.45 | -0.88 |
| -0.19 | -0.31 | -0.28 | 0.17  |
| 0.44  | -0.59 | 0.72  | 1.99  |
| 1.03  | 1.55  | -0.23 | -1.09 |
| 2.11  | 1.19  | 0.01  | 0.51  |
| 0.31  | 1.42  | 0.61  | -0.33 |
| 0.84  | -1.03 | 0.09  | 2.90  |
| 0.09  | -0.46 | -0.39 | -1.18 |
| 0.35  | 0.77  | -0.26 | -0.55 |
| 1.18  | -0.82 | -0.27 | 0.15  |
| -1.80 | -0.42 | -0.11 | -0.94 |
| -0.14 | -0.86 | -0.45 | 2.71  |
| -1.52 | -1.35 | 1.23  | 0.09  |
| -0.46 | 0.17  | -0.01 | 0.49  |
| 0.53  | 0.06  | 0.18  | 1.91  |
| -0.93 | -0.63 | -0.40 | -0.10 |
| 2.17  | -1.04 | -0.34 | 4.86  |
| 0.17  | -0.56 | -0.35 | 0.52  |
| -0.85 | -0.28 | -0.15 | 3.26  |
| -1.79 | 9.27  | -0.70 | -1.53 |
| -0.15 | 0.48  | -0.42 | 0.03  |
| -0.37 | -0.66 | -0.31 | 0.42  |
| 0.94  | 0.54  | -0.17 | 1.24  |
| 0.65  | -1.02 | 0.36  | 0.53  |
| 4.04  | -0.93 | 0.20  | 0.33  |
| 2.05  | -1.03 | -0.30 | -0.53 |
| 2.34  | -0.25 | -0.16 | -0.49 |
| 0.81  | 1.02  | -0.54 | -0.56 |
| 0.65  | -0.24 | -0.01 | 1.47  |
| -0.16 | -1.20 | -0.23 | 2.20  |
| 1.18  | -0.47 | -0.41 | -0.19 |
| 1.92  | -0.43 | -0.08 | -0.47 |

|       |           |       |       |
|-------|-----------|-------|-------|
| 0.47  | -0.35     | -0.54 | -0.20 |
| 2.20  | -0.85     | -0.41 | 0.87  |
| 1.93  | -0.21     | -0.37 | -0.39 |
| -0.78 | -0.69     | 0.83  | -0.85 |
| -0.42 | -0.65     | -0.51 | -0.73 |
| 1.07  | 0.37      | -0.36 | -0.84 |
| -0.45 | -1.25     | 0.62  | -0.52 |
| -0.03 | -2.73E-02 | 0     | 1     |

---

| 102                           | 103        | 104                    | 105                     |
|-------------------------------|------------|------------------------|-------------------------|
| 23                            | 50         | 30                     | 45                      |
| TCAGTGCATGAGATGAAGCACTGTAGCTC |            | TCAGTGCATCACAGAACTTTGT | TCTCACACAGAAATCGCACCCGT |
| miR-148a                      | miR-143-3p | miR-148b-3p            | miR-342-3p              |
| 664224                        | 177234     | 497718                 | 229733                  |
| 0.38                          | -0.43      | 0.26                   | 1.43                    |
| -1.27                         | -0.55      | -1.50                  | 2.87                    |
| -0.65                         | -0.51      | -0.73                  | -0.15                   |
| -0.45                         | -0.54      | -0.75                  | -0.52                   |
| -1.13                         | -0.61      | -1.43                  | 2.74                    |
| 1.18                          | 0.03       | 0.67                   | -0.91                   |
| -0.16                         | 0.01       | 1.48                   | -0.48                   |
| -0.75                         | -0.44      | -0.75                  | -0.94                   |
| -0.85                         | -0.50      | -0.70                  | -0.81                   |
| -0.72                         | -0.42      | -0.75                  | 1.01                    |
| 0.10                          | 0.48       | 0.67                   | 0.50                    |
| -0.69                         | -0.32      | -1.22                  | -0.39                   |
| 2.66                          | 3.41       | 0.15                   | -0.10                   |
| -1.14                         | -0.50      | -1.16                  | -0.53                   |
| -0.28                         | -0.29      | -0.65                  | -0.73                   |
| 0.58                          | 0.23       | 0.51                   | -0.38                   |
| -0.54                         | -0.45      | 0.80                   | 0.22                    |
| -0.70                         | 0.08       | -0.89                  | -0.36                   |
| 2.30                          | 0.81       | 0.21                   | -0.14                   |
| 0.81                          | 3.08       | -0.79                  | -0.15                   |
| 0.86                          | -0.40      | 1.51                   | -0.91                   |
| 0.22                          | -0.39      | 1.68                   | -0.22                   |
| 0.12                          | -0.19      | 1.17                   | -0.34                   |
| -0.61                         | -0.53      | 0.47                   | -0.49                   |
| -0.66                         | -0.65      | -0.61                  | -0.50                   |
| 0.20                          | -0.42      | 1.57                   | 0.92                    |
| 1.18                          | 0.04       | 0.79                   | -0.65                   |
| 0.64                          | 1.96       | -0.98                  | -0.52                   |
| 4.72                          | 0.99       | 1.01                   | 0.10                    |
| 0.93                          | -0.08      | -0.19                  | 0.13                    |
| -0.75                         | -0.66      | 0.86                   | -0.65                   |
| 2.64                          | 0.02       | 0.85                   | 0.65                    |
| -0.90                         | -0.52      | -1.74                  | 0.24                    |
| 0.24                          | 0.89       | -0.20                  | -0.85                   |
| -0.44                         | 0.19       | -0.94                  | -0.11                   |
| 0.05                          | -0.18      | 0.23                   | 0.23                    |
| -1.35                         | -0.66      | -1.72                  | -1.22                   |
| 1.63                          | 0.97       | -0.38                  | -0.47                   |
| 1.31                          | 1.38       | -0.27                  | 2.50                    |

|       |       |       |       |
|-------|-------|-------|-------|
| -0.62 | -0.27 | -0.91 | 1.08  |
| -0.90 | 0.12  | 5.56  | 0.20  |
| -0.86 | 1.24  | 7.72  | 3.57  |
| -0.56 | -0.48 | 1.36  | -0.48 |
| 4.26  | 1.07  | 1.23  | -0.75 |
| -0.77 | -0.32 | -0.73 | -0.31 |
| -1.32 | -0.53 | 1.28  | -0.71 |
| 1.09  | 0.53  | 0.91  | 0.49  |
| 0.62  | 0.12  | 1.35  | 0.13  |
| -0.59 | -0.08 | -0.69 | -0.24 |
| -0.63 | -0.20 | -0.52 | 0.82  |
| -0.48 | -0.24 | 0.59  | 0.83  |
| 0.65  | -0.48 | 4.20  | -0.54 |
| 0.23  | -0.46 | 3.01  | -0.98 |
| 1.01  | -0.12 | 1.71  | -0.08 |
| 0.55  | -0.45 | 1.37  | -0.91 |
| 0.40  | -0.53 | 1.36  | -0.49 |
| 0.32  | -0.51 | 1.59  | -0.76 |
| 0.21  | 0.77  | -0.83 | -0.58 |
| -0.07 | -0.53 | 0.97  | 0.01  |
| -0.18 | -0.44 | 0.65  | -0.23 |
| -0.77 | -0.58 | -0.59 | 0.44  |
| 0.77  | 0.96  | -0.76 | -0.88 |
| -0.22 | -0.55 | 0.30  | -0.74 |
| -0.58 | -0.50 | 0.48  | -0.61 |
| -0.11 | -0.46 | -0.09 | -0.63 |
| -0.38 | 1.64  | -0.83 | 0.03  |
| 0.26  | -0.33 | 0.00  | -0.06 |
| 0.43  | -0.47 | 0.07  | 1.34  |
| -1.02 | -0.65 | -0.84 | -0.06 |
| 0.07  | -0.37 | -0.06 | 0.49  |
| 0.15  | -0.38 | 0.19  | -0.45 |
| 1.49  | 4.63  | -0.63 | -0.33 |
| -0.51 | -0.48 | -0.63 | -0.83 |
| -0.82 | 0.72  | -1.33 | 0.04  |
| -1.38 | -0.56 | -0.57 | 2.81  |
| 0.02  | 0.01  | 0.05  | -0.51 |
| 0.87  | 0.06  | -0.28 | 0.15  |
| 0.81  | -0.08 | -0.17 | -0.66 |
| 0.85  | -0.17 | 1.21  | 0.51  |
| 0.40  | -0.08 | 0.97  | 0.44  |
| -0.41 | -0.53 | 0.69  | 0.12  |
| 0.29  | -0.42 | 1.59  | 0.95  |
| -0.55 | 0.06  | -0.40 | 0.57  |
| 0.88  | 3.71  | -0.94 | 1.77  |
| 0.86  | 1.40  | -1.06 | -0.59 |
| -0.61 | 0.29  | -0.22 | 1.03  |
| 0.41  | -0.10 | 0.55  | 0.86  |
| 0.05  | -0.38 | 0.07  | 0.11  |
| 3.18  | 1.48  | 0.38  | -0.71 |
| -0.07 | -0.39 | 0.71  | 0.13  |
| 1.13  | 1.87  | -0.31 | -0.71 |
| 3.98  | -0.23 | 1.53  | -1.01 |
| 0.59  | -0.29 | 1.63  | -0.55 |
| 2.75  | -0.29 | 2.48  | -0.84 |
| 1.03  | -0.43 | 3.96  | 0.32  |
| 0.68  | 0.69  | 0.73  | 0.74  |
| 1.00  | 0.65  | 0.64  | 0.78  |













































































































































































UC NP P  
 #REF! #REF! #REF!  
 using all thresholds = 0.54140,  
 corresponding to 1E-3 frequency of corrs  
 > 0.54140

| only reselection of 29s |            |             |
|-------------------------|------------|-------------|
| PvUC ttest              | NPvP ttest | NPvUC ttest |
| 0.00E+00                | 0.00E+00   | 0.00E+00    |
| 7.43E-158               | 6.16E-63   | 1.81E-44    |
| 7.48E-14                | 9.29E-07   | 1.03E-04    |

ction of 29s #REF!

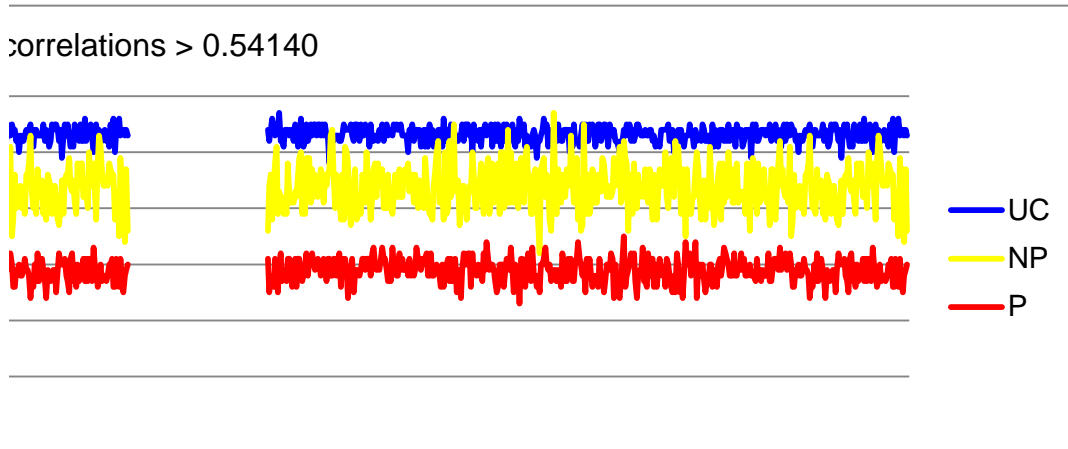



total UC reads after discards

16189

16189

15375

15296

15271

14130

13677

13338

12972

12390

12316

12206

11818

11405

11117

11010

10801

10703

10601

9806

9782

























































| 5                       | 6                   | 7                      | 8                     |
|-------------------------|---------------------|------------------------|-----------------------|
| 259 mature miRNAs:      | TATTGCACTTGTCCCGGCC | CAACGGAATCCCAAAGCAGCTG | TCTCCAACCCTTGTACCAGTG |
| ID                      | miR-92a-3p          | miR-191-5p             | miR-150-5p            |
| total all samples =100: | 46389442            | 10497180               | 8994745               |
| UC                      | 17.08               | 0.63                   | 1.27                  |
| UC                      | 3.76                | 15.01                  | 1.45                  |
| UC                      | 11.64               | 1.30                   | 0.42                  |
| UC                      | 17.41               | 0.82                   | 0.80                  |
| UC                      | 1.87                | 5.70                   | 5.29                  |
| UC                      | 14.85               | 1.55                   | 1.00                  |
| UC                      | 14.41               | 0.74                   | 2.47                  |
| UC                      | 17.33               | 1.47                   | 2.54                  |
| UC                      | 16.56               | 3.05                   | 0.50                  |
| UC                      | 15.83               | 2.63                   | 1.21                  |
| UC                      | 11.24               | 4.26                   | 1.63                  |
| UC                      | 13.86               | 0.50                   | 6.11                  |
| UC                      | 6.82                | 1.31                   | 1.56                  |
| UC                      | 16.32               | 1.40                   | 2.74                  |
| UC                      | 12.20               | 3.50                   | 1.17                  |
| UC                      | 9.31                | 2.79                   | 2.16                  |
| UC                      | 11.44               | 3.20                   | 2.40                  |
| UC                      | 11.57               | 1.47                   | 2.57                  |
| UC                      | 9.38                | 6.27                   | 1.99                  |
| UC                      | 7.62                | 1.61                   | 1.45                  |
| UC                      | 15.29               | 1.68                   | 1.29                  |
| UC                      | 11.98               | 2.11                   | 3.70                  |
| UC                      | 12.33               | 2.10                   | 2.91                  |
| UC                      | 14.79               | 1.41                   | 2.57                  |
| UC                      | 3.24                | 12.29                  | 1.57                  |
| UC                      | 6.65                | 6.06                   | 3.14                  |
| UC                      | 8.93                | 3.47                   | 1.02                  |
| CHR_NP                  | 6.98                | 0.77                   | 0.26                  |
| CHR_NP                  | 13.17               | 3.20                   | 1.08                  |
| CHR_NP                  | 15.91               | 4.64                   | 0.59                  |
| CHR_NP                  | 15.47               | 5.99                   | 0.38                  |
| CHR_NP                  | 6.54                | 8.55                   | 0.54                  |
| CHR_NP                  | 1.16                | 6.37                   | 1.55                  |
| CHR_NP                  | 16.96               | 1.39                   | 0.90                  |
| CHR_NP                  | 15.55               | 2.58                   | 1.29                  |
| CHR_NP                  | 12.34               | 1.18                   | 5.81                  |
| CHR_NP                  | 23.63               | 0.37                   | 0.61                  |
| CHR_NP                  | 12.30               | 1.02                   | 3.01                  |
| CHR_NP                  | 6.39                | 0.83                   | 1.28                  |
| CHR_NP                  | 9.26                | 2.38                   | 6.02                  |
| CHR_NP                  | 14.47               | 1.08                   | 2.96                  |
| CHR_NP                  | 5.12                | 1.20                   | 4.43                  |
| CHR_NP                  | 14.32               | 2.33                   | 2.67                  |
| CHR_NP                  | 11.69               | 2.81                   | 1.26                  |
| CHR_NP                  | 14.35               | 4.24                   | 3.73                  |
| CHR_NP                  | 16.84               | 0.60                   | 1.69                  |
| CHR_NP                  | 6.82                | 4.50                   | 2.37                  |
| CHR_NP                  | 11.42               | 2.31                   | 2.75                  |
| CHR_NP                  | 12.56               | 2.27                   | 2.36                  |
| CHR_NP                  | 10.93               | 2.02                   | 5.36                  |



|        |       |       |      |
|--------|-------|-------|------|
| CHR_NP | 9.29  | 2.20  | 4.15 |
| CHR_NP | 12.83 | 3.95  | 2.72 |
| CHR_NP | 15.87 | 3.08  | 0.70 |
| CHR_NP | 9.89  | 3.75  | 2.46 |
| CHR_NP | 15.48 | 2.54  | 1.67 |
| CHR_NP | 14.23 | 3.73  | 1.80 |
| CHR_NP | 13.95 | 2.34  | 1.90 |
| CHR_NP | 4.86  | 1.19  | 1.04 |
| CHR_NP | 8.19  | 3.15  | 4.06 |
| CHR_NP | 3.59  | 4.90  | 2.58 |
| CHR_NP | 2.52  | 4.71  | 4.61 |
| CHR_NP | 6.08  | 1.42  | 0.67 |
| CHR_NP | 14.88 | 2.50  | 1.80 |
| CHR_NP | 12.94 | 2.18  | 2.03 |
| CHR_NP | 8.98  | 2.95  | 0.83 |
| CHR_P  | 12.54 | 0.50  | 0.66 |
| CHR_P  | 11.66 | 0.60  | 0.34 |
| CHR_P  | 7.89  | 10.22 | 0.92 |
| CHR_P  | 5.48  | 1.42  | 1.48 |
| CHR_P  | 6.88  | 2.04  | 1.78 |
| CHR_P  | 17.52 | 0.79  | 1.13 |
| CHR_P  | 4.55  | 0.06  | 9.21 |
| CHR_P  | 14.33 | 1.06  | 1.13 |
| CHR_P  | 10.06 | 1.01  | 3.52 |
| CHR_P  | 12.27 | 0.52  | 5.04 |
| CHR_P  | 10.92 | 1.31  | 3.42 |
| CHR_P  | 8.96  | 6.69  | 2.97 |
| CHR_P  | 10.18 | 7.08  | 1.60 |
| CHR_P  | 7.73  | 3.56  | 1.17 |
| CHR_P  | 6.27  | 5.24  | 1.04 |
| CHR_P  | 11.78 | 6.21  | 1.07 |
| CHR_P  | 8.28  | 3.76  | 2.90 |
| CHR_P  | 12.13 | 1.94  | 6.63 |
| CHR_P  | 5.36  | 1.30  | 1.74 |
| CHR_P  | 4.54  | 0.95  | 0.63 |
| CHR_P  | 12.06 | 2.62  | 4.16 |
| CHR_P  | 8.77  | 3.03  | 4.17 |
| CHR_P  | 11.80 | 2.25  | 3.65 |
| CHR_P  | 10.14 | 3.38  | 1.31 |
| CHR_P  | 10.66 | 3.88  | 3.87 |
| CHR_P  | 6.92  | 2.73  | 0.42 |
| CHR_P  | 16.30 | 2.68  | 1.77 |
| CHR_P  | 11.79 | 2.22  | 2.27 |
| CHR_P  | 8.76  | 6.90  | 0.46 |
| CHR_P  | 10.64 | 2.52  | 1.18 |
| 0      | 0.00  | 0.00  | 0.00 |
| 0      | 0.00  | 0.00  | 0.00 |
| 0      | 0.00  | 0.00  | 0.00 |





---

|   |             |   |             |   |            |   |             |
|---|-------------|---|-------------|---|------------|---|-------------|
| 6 |             | 7 |             | 8 |            | 9 |             |
|   | <i>B_32</i> |   | <i>B_34</i> |   | <i>C_1</i> |   | <i>C_40</i> |

---

0.54  
0.20

0.33

|       |       |       |       |
|-------|-------|-------|-------|
| -0.03 | -0.34 | 0.01  |       |
| -0.10 | -0.40 | -0.32 | 0.55  |
| -0.12 | -0.42 | -0.43 | 0.33  |
| 0.29  | 0.41  | 0.53  | -0.23 |
| -0.08 | -0.22 | -0.36 | -0.18 |
| 0.00  | 0.32  | 0.74  | 0.00  |
| -0.35 | -0.33 | -0.29 | 0.24  |
| -0.01 | -0.16 | -0.42 | -0.12 |
| -0.14 | 0.20  | 0.17  | -0.27 |
| -0.35 | -0.07 | 0.00  | -0.04 |
| -0.18 | -0.27 | -0.18 | -0.18 |
| -0.24 | -0.41 | -0.29 | 0.04  |
| 0.54  | 0.28  | 0.08  | 0.09  |
| 0.07  | 0.56  | 0.39  | -0.41 |
| 0.09  | 0.50  | 0.38  | -0.47 |
| 0.16  | 0.51  | 0.57  | -0.29 |
| -0.05 | -0.07 | 0.09  | 0.04  |
| -0.10 | 0.09  | -0.20 | -0.43 |
| -0.22 | -0.47 | -0.50 | 0.29  |
| -0.15 | -0.36 | -0.31 | 0.20  |
| 0.11  | -0.22 | -0.33 | 0.08  |
| -0.06 | -0.36 | -0.20 | 0.42  |
| 0.08  | -0.04 | 0.31  | 0.54  |
| -0.07 | -0.33 | -0.33 | 0.26  |
| -0.15 | -0.35 | -0.30 | 0.14  |
| 0.08  | 0.33  | 0.48  | -0.17 |
| -0.20 | 0.00  | 0.29  | -0.12 |
| 0.07  | 0.39  | 0.05  | -0.39 |
| 0.27  | 0.11  | 0.63  | 0.32  |
| 0.07  | 0.09  | -0.26 | -0.14 |
| -0.22 | -0.19 | -0.38 | -0.06 |
| -0.18 | 0.08  | 0.11  | -0.48 |
| -0.11 | 0.19  | 0.30  | -0.24 |
| -0.08 | 0.18  | 0.19  | -0.22 |
| 0.09  | 0.43  | 0.25  | -0.25 |
| -0.03 | -0.18 | -0.28 | -0.08 |
| 0.07  | 0.19  | 0.58  | -0.28 |
| -0.02 | 0.22  | 0.42  | -0.21 |
| -0.13 | -0.25 | -0.37 | -0.19 |
| 0.15  | 0.46  | 0.29  | -0.45 |
| -0.21 | -0.13 | 0.13  | -0.11 |
| -0.14 | 0.11  | 0.04  | -0.37 |
| -0.19 | -0.01 | -0.19 | -0.23 |
| 0.15  | 0.39  | -0.01 | -0.08 |
| 0.17  | 0.29  | 0.04  | 0.11  |
| 0.04  | 0.13  | -0.27 | -0.41 |
| 0.58  | 0.49  | 0.35  | -0.17 |

|       |       |       |       |
|-------|-------|-------|-------|
| 0.03  | 0.11  | 0.01  | 0.02  |
| 0.21  | 0.26  | -0.14 | 0.19  |
| -0.18 | -0.35 | -0.32 | 0.07  |
| 0.00  | 0.35  | 0.10  | -0.47 |
| 0.07  | 0.01  | -0.23 | -0.41 |
| -0.10 | -0.11 | -0.31 | -0.30 |
| -0.20 | -0.43 | -0.36 | 0.20  |
| -0.09 | -0.10 | 0.24  | 0.05  |
| 0.18  | -0.01 | -0.07 | 0.02  |
| -0.16 | -0.42 | -0.47 | 0.29  |
| 0.02  | 0.12  | 0.10  | -0.03 |
| -0.16 | -0.40 | -0.42 | 0.33  |
| -0.07 | -0.26 | -0.15 | 0.20  |
| -0.05 | 0.06  | 0.11  | 0.11  |
| -0.13 | 0.04  | -0.07 | -0.18 |
| 0.21  | 0.28  | 0.30  | 0.09  |
| 0.08  | -0.18 | -0.11 | -0.04 |
| 0.07  | -0.28 | -0.21 | 0.44  |
| -0.24 | -0.19 | -0.14 | -0.17 |
| -0.13 | 0.14  | 0.25  | -0.17 |
| 0.12  | 0.19  | -0.23 | -0.12 |
| -0.20 | -0.35 | -0.30 | -0.05 |
| 0.18  | -0.03 | 0.06  | 0.06  |
| -0.36 | -0.41 | -0.60 | 0.06  |
| -0.17 | -0.42 | -0.52 | -0.02 |
| -0.19 | -0.26 | 0.01  | 0.16  |
| 0.01  | -0.14 | -0.45 | -0.11 |
| 0.16  | 0.33  | 0.52  | -0.34 |
| -0.25 | -0.35 | -0.32 | -0.03 |
| -0.16 | -0.34 | -0.27 | 0.15  |
| -0.21 | -0.13 | 0.00  | -0.21 |
| -0.12 | -0.04 | -0.27 | -0.40 |
| 0.00  | -0.19 | -0.16 | 0.04  |
| -0.08 | -0.28 | -0.37 | -0.11 |
| -0.11 | -0.12 | -0.21 | -0.21 |
| -0.08 | -0.15 | -0.35 | 0.10  |
| 0.33  | 0.24  | 0.16  | -0.09 |
| 0.14  | 0.51  | 0.30  | -0.42 |
| -0.05 | -0.30 | -0.43 | 0.21  |
| 0.01  | -0.11 | -0.39 | 0.08  |

| 4                      | 5                 | 6                      | 7                     |
|------------------------|-------------------|------------------------|-----------------------|
| 106                    | 107               | 108                    | 109                   |
| TACCCATTGCATATCGGAGTTG | ACCCCACTCCTGGTACC | TTATCAGAATCTCCAGGGGTAC | TAAAGTGCTGACAGTGCAGAT |
| miR-660-5p             | miR-4286          | miR-361-5p             | miR-106b-5p           |
| 23949                  | 23822             | 23449                  | 23446                 |
| -0.51                  | 1.23              | -0.40                  | -0.42                 |
| -0.07                  | -1.16             | 1.33                   | -0.19                 |
| 0.33                   | -1.17             | -0.45                  | 0.84                  |
| 0.13                   | -1.14             | -0.76                  | -0.19                 |
| -0.56                  | 2.46              | 4.06                   | 0.96                  |
| -0.70                  | -0.88             | -0.25                  | -0.28                 |
| -0.55                  | -0.14             | -0.57                  | -0.51                 |
| -0.65                  | 0.97              | -0.60                  | -0.82                 |
| -0.56                  | -1.28             | -0.51                  | -0.86                 |
| -0.50                  | -0.78             | -0.21                  | 0.15                  |
| -0.19                  | -0.54             | 0.14                   | -0.49                 |
| -0.64                  | -0.42             | -0.76                  | -0.95                 |
| 2.94                   | 0.65              | 0.10                   | 3.79                  |
| -0.77                  | -0.31             | -0.66                  | -0.92                 |
| 0.19                   | -0.35             | -0.27                  | -0.15                 |
| 0.72                   | 0.21              | -0.06                  | 0.77                  |
| -0.53                  | 0.06              | -0.12                  | -0.31                 |
| 2.16                   | 1.82              | -0.54                  | 1.00                  |
| 0.36                   | 0.08              | 0.22                   | -0.55                 |
| 1.97                   | -0.38             | 0.02                   | 1.44                  |

|       |       |       |       |
|-------|-------|-------|-------|
| -0.61 | -0.82 | -0.39 | -0.48 |
| -0.79 | 0.43  | -0.53 | -0.83 |
| -0.51 | 0.17  | -0.38 | -0.46 |
| -0.73 | -0.14 | -0.47 | -0.36 |
| -0.67 | 1.54  | 1.75  | -0.51 |
| -0.57 | 1.08  | 0.62  | -0.22 |
| 1.32  | -1.18 | -0.30 | 0.55  |
| 5.07  | -1.19 | -0.61 | 4.67  |
| 0.23  | -0.35 | 0.50  | -0.15 |
| 0.16  | -0.90 | -0.32 | -0.65 |
| -0.39 | -0.93 | -0.20 | -0.82 |
| 2.14  | -0.14 | 0.27  | -0.27 |
| -0.03 | 2.83  | 1.81  | 1.79  |
| -0.37 | 1.84  | -0.52 | -0.29 |
| -0.12 | 4.22  | 0.05  | 0.13  |
| -0.66 | 0.21  | -0.48 | -0.65 |
| -0.93 | -1.15 | -0.90 | -1.04 |
| -0.16 | -0.78 | -0.08 | -0.29 |
| 4.48  | -0.17 | 0.21  | 1.91  |
| -0.50 | 0.42  | -0.09 | -0.65 |
| -0.63 | 12.46 | -0.52 | 0.26  |
| -0.24 | 39.75 | -0.68 | -0.15 |
| -0.75 | 0.45  | -0.26 | -0.73 |
| 0.45  | 0.75  | 0.47  | 1.60  |
| -0.54 | 0.84  | -0.33 | -1.05 |
| -0.90 | 10.03 | -0.77 | -0.32 |
| -0.31 | 0.59  | 1.10  | 0.19  |
| -0.59 | 0.71  | 0.14  | -0.37 |
| -0.29 | 0.63  | -0.22 | 0.20  |
| -0.50 | 0.21  | -0.10 | -0.26 |
| -0.18 | 0.32  | -0.08 | 0.42  |
| -0.73 | 0.85  | -0.14 | -0.47 |
| -0.72 | 0.33  | -0.19 | -0.30 |
| -0.50 | 1.12  | 0.79  | 0.50  |
| -0.72 | -0.26 | -0.51 | -0.71 |
| -0.70 | -0.35 | -0.25 | -0.62 |
| -0.52 | -0.28 | -0.22 | -0.07 |
| 5.80  | -0.69 | -0.44 | 4.61  |
| -0.52 | -0.15 | 0.17  | -0.76 |
| 0.00  | 0.84  | 0.85  | 0.93  |
| 0.01  | 0.61  | 1.61  | 1.08  |
| 4.37  | -1.24 | -0.49 | 3.12  |
| -0.47 | -0.82 | -0.44 | -0.66 |
| -0.52 | -0.48 | -0.54 | -0.30 |
| 0.22  | -1.15 | -0.31 | 0.11  |
| 4.09  | -1.28 | -0.85 | -0.55 |
| 2.19  | -0.75 | -0.41 | 0.85  |
| 0.08  | 1.31  | 0.28  | -1.19 |
| 0.48  | -0.23 | -0.46 | 0.83  |
| 0.67  | 0.81  | -0.17 | 1.04  |
| -0.19 | -0.52 | -0.68 | -0.34 |
| -0.59 | -0.49 | -0.27 | 0.51  |
| -0.13 | -0.94 | -0.56 | -0.18 |
| 0.92  | 0.25  | -0.30 | 0.78  |
| -0.82 | 37.19 | -0.73 | -1.13 |
| 0.49  | -0.45 | -0.56 | 0.69  |
| 0.14  | -0.37 | 0.10  | -0.75 |
| -0.40 | -0.64 | -0.34 | -1.03 |
| 1.57  | -0.08 | 0.54  | 1.65  |



|       |       |       |       |
|-------|-------|-------|-------|
| -0.09 | -0.33 | 0.91  | 0.01  |
| -0.66 | -0.45 | -0.10 | -0.62 |
| -0.36 | -0.20 | 0.55  | -0.34 |
| -0.73 | 0.94  | -0.30 | -0.15 |
| 3.40  | 0.08  | 0.06  | 2.73  |
| 4.13  | -1.23 | -0.52 | 4.15  |
| -0.32 | 1.05  | -0.10 | -0.29 |
| -0.38 | 0.01  | 0.06  | -0.09 |
| -0.54 | -0.29 | -0.08 | -0.18 |
| 1.17  | -0.60 | -0.09 | -0.16 |
| -0.52 | -0.05 | 0.30  | -0.08 |
| 1.63  | -1.40 | -0.44 | 0.58  |
| -0.53 | -0.06 | -0.46 | -0.83 |
| -0.63 | 0.31  | -0.41 | -0.20 |
| -0.15 | -0.95 | 0.10  | -0.56 |
| -0.23 | -0.41 | 0.28  | -0.49 |

|      |      |      |      |
|------|------|------|------|
| 1    | 1    | 1    | -2   |
| 0.00 | 0.00 | 0.00 | 0.00 |
| 1.00 | 1.00 | 1.00 | 1.00 |
| 0.55 | 0.66 | 0.32 | 0.79 |

| 106                    | 107               | 108                    | 109                   |
|------------------------|-------------------|------------------------|-----------------------|
| TACCCATTGCATATCGGAGTTG | ACCCCACTCCTGGTACC | TTATCAGAATCTCCAGGGGTAC | TAAAGTGCTGACAGTGCAGAT |
| miR-660-5p             | miR-4286          | miR-361-5p             | miR-106b-5p           |
| 23949                  | 23822             | 23449                  | 23446                 |
| -0.51                  | 1.23              | -0.40                  | -0.42                 |
| -0.07                  | -1.16             | 1.33                   | -0.19                 |
| 0.33                   | -1.17             | -0.45                  | 0.84                  |
| 0.13                   | -1.14             | -0.76                  | -0.19                 |
| -0.56                  | 2.46              | 4.06                   | 0.96                  |
| -0.70                  | -0.88             | -0.25                  | -0.28                 |
| -0.55                  | -0.14             | -0.57                  | -0.51                 |
| -0.65                  | 0.97              | -0.60                  | -0.82                 |
| -0.56                  | -1.28             | -0.51                  | -0.86                 |
| -0.50                  | -0.78             | -0.21                  | 0.15                  |
| -0.19                  | -0.54             | 0.14                   | -0.49                 |
| -0.64                  | -0.42             | -0.76                  | -0.95                 |
| 2.94                   | 0.65              | 0.10                   | 3.79                  |
| -0.77                  | -0.31             | -0.66                  | -0.92                 |
| 0.19                   | -0.35             | -0.27                  | -0.15                 |
| 0.72                   | 0.21              | -0.06                  | 0.77                  |
| -0.53                  | 0.06              | -0.12                  | -0.31                 |
| 2.16                   | 1.82              | -0.54                  | 1.00                  |
| 0.36                   | 0.08              | 0.22                   | -0.55                 |
| 1.97                   | -0.38             | 0.02                   | 1.44                  |
| -0.61                  | -0.82             | -0.39                  | -0.48                 |
| -0.79                  | 0.43              | -0.53                  | -0.83                 |
| -0.51                  | 0.17              | -0.38                  | -0.46                 |
| -0.73                  | -0.14             | -0.47                  | -0.36                 |
| -0.67                  | 1.54              | 1.75                   | -0.51                 |
| -0.57                  | 1.08              | 0.62                   | -0.22                 |
| 1.32                   | -1.18             | -0.30                  | 0.55                  |
| 5.07                   | -1.19             | -0.61                  | 4.67                  |

|       |       |       |       |
|-------|-------|-------|-------|
| 0.23  | -0.35 | 0.50  | -0.15 |
| 0.16  | -0.90 | -0.32 | -0.65 |
| -0.39 | -0.93 | -0.20 | -0.82 |
| 2.14  | -0.14 | 0.27  | -0.27 |
| -0.03 | 2.83  | 1.81  | 1.79  |
| -0.37 | 1.84  | -0.52 | -0.29 |
| -0.12 | 4.22  | 0.05  | 0.13  |
| -0.66 | 0.21  | -0.48 | -0.65 |
| -0.93 | -1.15 | -0.90 | -1.04 |
| -0.16 | -0.78 | -0.08 | -0.29 |
| 4.48  | -0.17 | 0.21  | 1.91  |
| -0.50 | 0.42  | -0.09 | -0.65 |
| -0.63 | 12.46 | -0.52 | 0.26  |
| -0.24 | 39.75 | -0.68 | -0.15 |
| -0.75 | 0.45  | -0.26 | -0.73 |
| 0.45  | 0.75  | 0.47  | 1.60  |
| -0.54 | 0.84  | -0.33 | -1.05 |
| -0.90 | 10.03 | -0.77 | -0.32 |
| -0.31 | 0.59  | 1.10  | 0.19  |
| -0.59 | 0.71  | 0.14  | -0.37 |
| -0.29 | 0.63  | -0.22 | 0.20  |
| -0.50 | 0.21  | -0.10 | -0.26 |
| -0.18 | 0.32  | -0.08 | 0.42  |
| -0.73 | 0.85  | -0.14 | -0.47 |
| -0.72 | 0.33  | -0.19 | -0.30 |
| -0.50 | 1.12  | 0.79  | 0.50  |
| -0.72 | -0.26 | -0.51 | -0.71 |
| -0.70 | -0.35 | -0.25 | -0.62 |
| -0.52 | -0.28 | -0.22 | -0.07 |
| 5.80  | -0.69 | -0.44 | 4.61  |
| -0.52 | -0.15 | 0.17  | -0.76 |
| 0.00  | 0.84  | 0.85  | 0.93  |
| 0.01  | 0.61  | 1.61  | 1.08  |
| 4.37  | -1.24 | -0.49 | 3.12  |
| -0.47 | -0.82 | -0.44 | -0.66 |
| -0.52 | -0.48 | -0.54 | -0.30 |
| 0.22  | -1.15 | -0.31 | 0.11  |
| 4.09  | -1.28 | -0.85 | -0.55 |
| 2.19  | -0.75 | -0.41 | 0.85  |
| 0.08  | 1.31  | 0.28  | -1.19 |
| 0.48  | -0.23 | -0.46 | 0.83  |
| 0.67  | 0.81  | -0.17 | 1.04  |
| -0.19 | -0.52 | -0.68 | -0.34 |
| -0.59 | -0.49 | -0.27 | 0.51  |
| -0.13 | -0.94 | -0.56 | -0.18 |
| 0.92  | 0.25  | -0.30 | 0.78  |
| -0.82 | 37.19 | -0.73 | -1.13 |
| 0.49  | -0.45 | -0.56 | 0.69  |
| 0.14  | -0.37 | 0.10  | -0.75 |
| -0.40 | -0.64 | -0.34 | -1.03 |
| 1.57  | -0.08 | 0.54  | 1.65  |
| -0.09 | -0.33 | 0.91  | 0.01  |
| -0.66 | -0.45 | -0.10 | -0.62 |
| -0.36 | -0.20 | 0.55  | -0.34 |
| -0.73 | 0.94  | -0.30 | -0.15 |
| 3.40  | 0.08  | 0.06  | 2.73  |
| 4.13  | -1.23 | -0.52 | 4.15  |
| -0.32 | 1.05  | -0.10 | -0.29 |
| -0.38 | 0.01  | 0.06  | -0.09 |

|       |       |       |       |
|-------|-------|-------|-------|
| -0.54 | -0.29 | -0.08 | -0.18 |
| 1.17  | -0.60 | -0.09 | -0.16 |
| -0.52 | -0.05 | 0.30  | -0.08 |
| 1.63  | -1.40 | -0.44 | 0.58  |
| -0.53 | -0.06 | -0.46 | -0.83 |
| -0.63 | 0.31  | -0.41 | -0.20 |
| -0.15 | -0.95 | 0.10  | -0.56 |
| 0     | 0     | 0     | 0     |

---

| 106                    | 107                 | 108                    | 109                   |
|------------------------|---------------------|------------------------|-----------------------|
| 20                     | 31                  | 111                    | 26                    |
| CACTAGATTGTGAGCTCCTGGA | TGTAAACATCCTACACTCI | ACCATCGACCGTTGATTGTACC | TACCACAGGGTAGAACCACGG |
| miR-28-3p              | miR-30c-5p          | miR-181a-3p            | miR-140-3p            |
| 903691                 | 492626              | 23176                  | 605614                |
| 0.42                   | -0.41               | -0.85                  | 1.34                  |
| 3.14                   | -0.86               | -0.38                  | -1.78                 |
| -0.33                  | -0.23               | -0.11                  | 0.50                  |
| -0.84                  | -0.87               | -0.91                  | 1.67                  |
| -0.57                  | 0.52                | -0.47                  | -1.76                 |
| 0.22                   | -1.19               | -1.21                  | -0.75                 |
| 0.15                   | -1.14               | -0.83                  | -0.36                 |
| -0.99                  | -0.58               | -0.40                  | -0.61                 |
| -0.89                  | -0.54               | -0.80                  | -0.73                 |
| -0.17                  | -0.57               | -0.84                  | -0.61                 |
| 1.11                   | 0.31                | 0.90                   | -0.21                 |
| -0.82                  | -0.23               | -0.28                  | -0.89                 |
| -0.26                  | 2.45                | 1.90                   | -0.37                 |
| -1.04                  | -1.11               | -0.64                  | -0.34                 |
| -0.22                  | 0.13                | 0.54                   | 0.91                  |
| 0.03                   | 1.73                | 1.25                   | 0.36                  |
| -0.02                  | 0.02                | -0.18                  | 1.35                  |
| -0.70                  | -0.16               | 2.26                   | 0.53                  |
| 2.92                   | 1.63                | 1.80                   | 1.12                  |
| -0.41                  | 2.06                | 1.94                   | 1.12                  |
| -0.01                  | -0.88               | -0.22                  | -0.27                 |
| 0.20                   | 0.11                | -0.25                  | 1.34                  |
| 0.04                   | -0.20               | -0.33                  | 0.69                  |
| -0.70                  | -1.01               | -0.94                  | 0.24                  |
| 0.09                   | -0.32               | -0.16                  | -1.91                 |
| 0.02                   | 0.38                | -0.34                  | -0.47                 |
| -0.36                  | 0.94                | -0.44                  | -0.12                 |
| -0.75                  | -0.66               | 0.32                   | -0.18                 |
| 6.39                   | 0.33                | 1.55                   | 1.20                  |
| 3.15                   | -0.83               | -0.07                  | -0.52                 |
| 0.86                   | -1.55               | -1.09                  | -1.39                 |
| 7.78                   | 0.49                | 0.77                   | -1.40                 |
| -1.27                  | 1.79                | 0.08                   | -1.82                 |
| 0.17                   | 0.32                | -0.59                  | 0.62                  |
| -0.58                  | 1.10                | 0.28                   | -0.26                 |
| 0.44                   | 0.41                | -0.07                  | 1.10                  |
| -1.95                  | -1.76               | -1.26                  | -1.47                 |
| 1.25                   | 0.87                | 0.50                   | 1.04                  |
| 0.68                   | 0.83                | 2.67                   | -0.11                 |

|       |       |       |       |
|-------|-------|-------|-------|
| 0.13  | 1.28  | 1.27  | -0.17 |
| 0.78  | -0.94 | -1.40 | 0.18  |
| 0.78  | -0.99 | -0.92 | 2.26  |
| -0.02 | -0.81 | -0.38 | 0.79  |
| 1.61  | 1.48  | 0.55  | 1.09  |
| 0.55  | 0.76  | 1.16  | -0.03 |
| -0.43 | -1.56 | -1.45 | -0.90 |
| 0.34  | 4.26  | 0.92  | 1.33  |
| 0.89  | 1.25  | 0.65  | 0.71  |
| -1.03 | 2.98  | 0.74  | 1.23  |
| -0.28 | 2.36  | 0.99  | 1.94  |
| -0.53 | 2.46  | 2.30  | 1.12  |
| 0.20  | -0.72 | -0.77 | 1.49  |
| -0.67 | -1.18 | -1.08 | 1.04  |
| -0.30 | 1.54  | -0.29 | 0.93  |
| -0.41 | -0.52 | -0.39 | 0.30  |
| 0.06  | -0.96 | -0.36 | 1.34  |
| -0.90 | 0.20  | -0.75 | 0.62  |
| -0.74 | 0.51  | 1.39  | -0.52 |
| 1.00  | 0.33  | 0.68  | -0.79 |
| 0.70  | 3.47  | 1.48  | -1.37 |
| 0.13  | 2.90  | 0.96  | -1.43 |
| -0.78 | 0.17  | 0.22  | -0.95 |
| -1.04 | -0.54 | -1.20 | -0.48 |
| -0.79 | 0.38  | -0.82 | -0.93 |
| -0.82 | 0.06  | -0.28 | -0.22 |
| -0.20 | -0.83 | 1.43  | -0.29 |
| -0.48 | -0.50 | -0.60 | 1.31  |
| 7.04  | -1.06 | 0.23  | -1.66 |
| -1.10 | 0.01  | -0.52 | -0.87 |
| 0.12  | 2.01  | 1.40  | 0.11  |
| -0.35 | -0.47 | -0.87 | 1.16  |
| 1.34  | 1.58  | 1.52  | -0.07 |
| -1.13 | -0.07 | -0.56 | -0.18 |
| -0.70 | 1.86  | 0.95  | -0.02 |
| -0.71 | -1.86 | -1.10 | 1.25  |
| -0.85 | 0.52  | 0.38  | -0.28 |
| 2.53  | 0.66  | 1.73  | 0.21  |
| 3.15  | -0.39 | 0.38  | -1.02 |
| -0.71 | 1.93  | 2.25  | 2.55  |
| 0.23  | 2.51  | 0.97  | 0.40  |
| -0.60 | -0.34 | -0.73 | 0.29  |
| 0.17  | 0.93  | 0.42  | 0.20  |
| -0.72 | 2.45  | -0.54 | -0.17 |
| -0.14 | 2.36  | 2.86  | 0.83  |
| -1.22 | -0.15 | 1.60  | 0.10  |
| -0.10 | 2.33  | 0.58  | 1.08  |
| -0.15 | 1.65  | 0.91  | 2.04  |
| -0.70 | 0.61  | -0.67 | 1.24  |
| 0.94  | 2.13  | 1.77  | 1.60  |
| -0.35 | 1.22  | -0.08 | 0.87  |
| -0.93 | -0.92 | 0.99  | -0.74 |
| 0.07  | -0.90 | -0.58 | 1.02  |
| -0.18 | -0.17 | 0.47  | 1.14  |
| 0.37  | -0.04 | -0.09 | -0.77 |
| 0.05  | -0.16 | -0.44 | -0.39 |
| 0.75  | 0.77  | 0.86  | 0.88  |
| 1.00  | 0.55  | 1.00  | 1.00  |













































































































































































reselects

| UC | NP |
|----|----|
| 44 | 33 |
| 44 | 30 |
| 43 | 43 |
| 43 | 31 |
| 44 | 39 |
| 45 | 37 |
| 44 | 31 |
| 43 | 34 |
| 45 | 28 |
| 42 | 37 |
| 45 | 45 |
| 45 | 34 |
| 44 | 32 |
| 43 | 31 |
| 41 | 38 |
| 41 | 39 |
| 43 | 41 |
| 43 | 26 |
| 42 | 29 |
| 44 | 28 |
| 44 | 40 |
| 43 | 32 |
| 43 | 32 |
| 42 | 33 |
| 44 | 39 |
| 43 | 34 |
| 43 | 28 |
| 44 | 35 |
| 43 | 36 |
| 43 | 36 |
| 44 | 33 |
| 43 | 36 |
| 44 | 35 |
| 45 | 27 |
| 45 | 38 |
| 42 | 30 |
| 45 | 27 |
| 43 | 37 |
| 44 | 32 |
| 41 | 31 |
| 44 | 30 |
| 42 | 40 |
| 45 | 26 |
| 43 | 32 |
| 44 | 31 |
| 42 | 33 |
| 42 | 33 |
| 44 | 34 |
| 44 | 29 |
| 43 | 32 |
| 40 | 37 |

2.96E+13

|    |    |
|----|----|
| 42 | 34 |
| 44 | 32 |
| 43 | 30 |
| 42 | 34 |
| 42 | 32 |
| 43 | 30 |
| 43 | 24 |
| 43 | 39 |
| 45 | 26 |
| 41 | 32 |
| 44 | 35 |
| 43 | 31 |
| 45 | 38 |
| 42 | 33 |
| 44 | 33 |
| 42 | 35 |
| 45 | 34 |
| 45 | 33 |
| 43 | 41 |
| 45 | 36 |
| 45 | 25 |
| 41 | 35 |
| 43 | 35 |
| 45 | 37 |
| 44 | 31 |
| 40 | 35 |
| 43 | 33 |
| 43 | 35 |
| 45 | 31 |
| 44 | 33 |
| 43 | 34 |
| 44 | 30 |
| 44 | 35 |
| 42 | 33 |
| 43 | 28 |
| 42 | 33 |
| 43 | 24 |
| 42 | 30 |
| 41 | 38 |
| 41 | 37 |
| 44 | 27 |
| 45 | 36 |
| 45 | 26 |
| 45 | 34 |
| 40 | 38 |
| 45 | 30 |
| 45 | 30 |
| 45 | 41 |
| 42 | 38 |
| 45 | 28 |
| 44 | 39 |
| 44 | 37 |
| 42 | 39 |
| 42 | 37 |
| 42 | 40 |
| 42 | 40 |
| 43 | 29 |
| 40 | 34 |
| 41 | 32 |

|    |    |
|----|----|
| 44 | 30 |
| 44 | 27 |
| 42 | 34 |
| 42 | 29 |
| 42 | 31 |
| 42 | 27 |
| 45 | 36 |
| 43 | 39 |
| 45 | 31 |
| 41 | 29 |
| 45 | 34 |
| 44 | 38 |
| 41 | 32 |
| 43 | 35 |
| 43 | 34 |
| 45 | 34 |
| 44 | 34 |
| 42 | 34 |
| 44 | 28 |
| 44 | 37 |
| 43 | 34 |
| 45 | 28 |
| 42 | 37 |
| 44 | 38 |
| 46 | 34 |
| 43 | 39 |
| 44 | 32 |
| 45 | 27 |
| 43 | 35 |
| 39 | 41 |
| 43 | 34 |
| 44 | 35 |
| 42 | 36 |
| 43 | 33 |
| 43 | 31 |
| 42 | 37 |
| 43 | 36 |
| 43 | 39 |
| 42 | 32 |
| 43 | 37 |
| 42 | 32 |
| 42 | 30 |
| 45 | 26 |
| 44 | 30 |
| 44 | 31 |
| 43 | 31 |
| 44 | 34 |
| 45 | 35 |
| 45 | 34 |
| 43 | 36 |
| 44 | 34 |
| 44 | 37 |
| 42 | 36 |
| 43 | 38 |
| 45 | 32 |
| 44 | 33 |
| 45 | 30 |
| 45 | 36 |
| 39 | 33 |

|    |    |
|----|----|
| 44 | 34 |
| 45 | 38 |
| 39 | 26 |
| 44 | 29 |
| 42 | 36 |
| 45 | 38 |
| 45 | 30 |
| 43 | 33 |
| 43 | 40 |
| 43 | 37 |
| 45 | 36 |
| 44 | 37 |
| 43 | 34 |
| 40 | 30 |
| 45 | 35 |
| 44 | 27 |
| 45 | 34 |
| 41 | 35 |
| 44 | 36 |
| 44 | 39 |
| 43 | 34 |
| 45 | 28 |
| 40 | 36 |
| 43 | 35 |
| 45 | 39 |
| 40 | 31 |
| 42 | 34 |
| 43 | 35 |
| 45 | 29 |
| 44 | 37 |
| 37 | 37 |
| 45 | 31 |
| 41 | 34 |
| 43 | 29 |
| 42 | 39 |
| 45 | 32 |
| 41 | 38 |
| 43 | 35 |
| 43 | 36 |
| 45 | 36 |
| 42 | 33 |
| 45 | 36 |
| 41 | 30 |
| 43 | 36 |
| 46 | 28 |
| 43 | 34 |
| 42 | 37 |
| 41 | 30 |
| 46 | 30 |
| 43 | 36 |
| 45 | 39 |
| 42 | 41 |
| 45 | 32 |
| 41 | 34 |
| 44 | 34 |
| 43 | 35 |
| 43 | 32 |
| 45 | 33 |
| 45 | 34 |

|    |    |
|----|----|
| 41 | 31 |
| 43 | 32 |
| 42 | 35 |
| 43 | 38 |
| 44 | 35 |
| 44 | 39 |
| 43 | 30 |
| 45 | 34 |
| 40 | 33 |
| 44 | 38 |
| 44 | 34 |
| 43 | 32 |
| 40 | 28 |
| 44 | 26 |
| 45 | 39 |
| 43 | 34 |
| 44 | 34 |
| 40 | 34 |
| 42 | 32 |
| 43 | 33 |
| 42 | 31 |
| 44 | 39 |
| 42 | 37 |
| 42 | 32 |
| 44 | 34 |
| 45 | 39 |
| 44 | 29 |
| 45 | 36 |
| 42 | 36 |
| 40 | 34 |
| 42 | 29 |
| 42 | 30 |
| 42 | 38 |
| 44 | 32 |
| 42 | 33 |
| 44 | 35 |
| 40 | 40 |
| 44 | 34 |
| 39 | 30 |
| 43 | 36 |
| 44 | 35 |
| 44 | 37 |
| 43 | 36 |
| 42 | 32 |
| 42 | 33 |
| 43 | 37 |
| 41 | 33 |
| 43 | 30 |
| 42 | 42 |
| 45 | 33 |
| 45 | 30 |
| 43 | 36 |
| 42 | 36 |
| 43 | 38 |
| 43 | 33 |
| 43 | 32 |
| 42 | 39 |
| 45 | 34 |
| 44 | 38 |

|    |    |
|----|----|
| 44 | 31 |
| 44 | 35 |
| 44 | 28 |
| 44 | 36 |
| 45 | 26 |
| 42 | 41 |
| 42 | 28 |
| 43 | 29 |
| 44 | 34 |
| 45 | 29 |
| 40 | 29 |
| 45 | 35 |
| 44 | 31 |
| 43 | 33 |
| 45 | 36 |
| 44 | 30 |
| 43 | 31 |
| 43 | 35 |
| 42 | 25 |
| 42 | 33 |
| 43 | 31 |
| 44 | 29 |
| 41 | 31 |
| 44 | 30 |
| 42 | 31 |
| 43 | 28 |
| 41 | 36 |
| 42 | 32 |
| 44 | 36 |
| 43 | 31 |
| 42 | 39 |
| 46 | 30 |
| 44 | 28 |
| 44 | 32 |
| 44 | 34 |
| 43 | 26 |
| 43 | 30 |
| 42 | 36 |
| 44 | 36 |
| 40 | 31 |
| 41 | 36 |
| 44 | 38 |
| 41 | 36 |
| 44 | 32 |
| 43 | 37 |
| 41 | 36 |
| 41 | 39 |
| 43 | 34 |
| 45 | 32 |
| 40 | 42 |
| 45 | 26 |
| 46 | 36 |
| 43 | 32 |
| 45 | 29 |
| 44 | 34 |
| 44 | 34 |
| 44 | 36 |
| 44 | 35 |
| 44 | 35 |

|    |    |
|----|----|
| 44 | 27 |
| 43 | 37 |
| 46 | 27 |
| 41 | 34 |
| 44 | 28 |
| 41 | 39 |
| 45 | 32 |
| 44 | 37 |
| 44 | 29 |
| 42 | 36 |
| 44 | 34 |
| 43 | 40 |
| 43 | 34 |
| 44 | 36 |
| 41 | 29 |
| 44 | 35 |
| 41 | 33 |
| 42 | 34 |
| 44 | 32 |
| 44 | 33 |
| 43 | 30 |
| 43 | 36 |
| 43 | 36 |
| 45 | 39 |
| 46 | 37 |
| 44 | 37 |
| 43 | 32 |
| 45 | 29 |
| 43 | 31 |
| 45 | 33 |
| 46 | 33 |
| 43 | 36 |
| 40 | 39 |
| 43 | 31 |
| 44 | 32 |
| 46 | 33 |
| 44 | 35 |
| 43 | 36 |
| 46 | 32 |
| 40 | 37 |
| 45 | 26 |
| 45 | 37 |
| 42 | 36 |
| 44 | 31 |
| 45 | 32 |
| 45 | 32 |
| 39 | 39 |
| 42 | 31 |
| 44 | 34 |
| 44 | 32 |
| 44 | 32 |
| 45 | 27 |
| 44 | 40 |
| 42 | 37 |
| 42 | 32 |
| 40 | 32 |
| 44 | 27 |
| 45 | 26 |
| 43 | 35 |

|    |    |
|----|----|
| 44 | 47 |
| 44 | 39 |
| 42 | 37 |
| 44 | 35 |
| 40 | 35 |
| 43 | 30 |
| 44 | 33 |
| 45 | 37 |
| 40 | 39 |
| 43 | 34 |
| 43 | 38 |
| 45 | 31 |
| 42 | 39 |
| 43 | 32 |
| 41 | 30 |
| 42 | 35 |
| 43 | 32 |
| 44 | 35 |
| 43 | 36 |
| 39 | 36 |
| 44 | 31 |
| 44 | 41 |
| 43 | 34 |
| 46 | 29 |
| 42 | 35 |
| 42 | 35 |
| 43 | 31 |
| 42 | 40 |
| 44 | 40 |
| 39 | 36 |
| 44 | 28 |
| 45 | 37 |
| 42 | 34 |
| 43 | 32 |
| 44 | 32 |
| 45 | 28 |
| 40 | 32 |
| 43 | 35 |
| 41 | 31 |
| 43 | 35 |
| 42 | 28 |
| 42 | 36 |
| 43 | 37 |
| 43 | 32 |
| 45 | 29 |
| 42 | 37 |
| 43 | 34 |
| 45 | 24 |
| 42 | 36 |
| 45 | 26 |
| 41 | 28 |
| 44 | 34 |
| 45 | 26 |
| 43 | 36 |
| 43 | 35 |
| 45 | 33 |
| 42 | 37 |
| 42 | 32 |
| 42 | 32 |



|    |    |
|----|----|
| 41 | 34 |
| 43 | 39 |
| 45 | 32 |
| 45 | 33 |
| 44 | 29 |
| 42 | 30 |
| 44 | 26 |
| 44 | 31 |
| 42 | 36 |
| 43 | 30 |
| 40 | 39 |
| 42 | 30 |
| 44 | 33 |
| 43 | 32 |
| 45 | 33 |
| 43 | 40 |
| 43 | 37 |
| 42 | 34 |
| 40 | 30 |
| 42 | 30 |
| 42 | 33 |
| 45 | 30 |
| 43 | 31 |
| 44 | 34 |
| 42 | 30 |
| 43 | 36 |
| 41 | 31 |
| 40 | 36 |
| 43 | 33 |
| 43 | 43 |
| 42 | 32 |
| 44 | 35 |
| 41 | 30 |
| 44 | 35 |
| 43 | 28 |
| 44 | 33 |
| 43 | 31 |
| 40 | 35 |
| 43 | 37 |
| 43 | 35 |
| 43 | 44 |
| 43 | 39 |
| 44 | 31 |
| 43 | 33 |
| 45 | 31 |
| 45 | 34 |
| 45 | 26 |
| 44 | 35 |
| 43 | 34 |
| 44 | 36 |
| 44 | 33 |
| 45 | 32 |
| 44 | 39 |
| 42 | 31 |
| 42 | 36 |
| 45 | 25 |
| 44 | 29 |
| 43 | 35 |
| 44 | 34 |

|    |    |
|----|----|
| 43 | 32 |
| 43 | 32 |
| 43 | 34 |
| 43 | 33 |
| 42 | 32 |
| 44 | 31 |
| 43 | 30 |
| 43 | 41 |
| 41 | 36 |
| 45 | 31 |
| 43 | 32 |
| 43 | 37 |
| 43 | 31 |
| 42 | 37 |
| 46 | 29 |
| 43 | 29 |
| 43 | 31 |
| 44 | 31 |
| 44 | 34 |
| 43 | 29 |
| 46 | 37 |
| 43 | 35 |
| 46 | 28 |
| 45 | 31 |
| 43 | 34 |
| 44 | 29 |
| 43 | 38 |
| 43 | 34 |
| 42 | 36 |
| 42 | 34 |
| 44 | 36 |
| 46 | 28 |
| 44 | 34 |
| 43 | 38 |
| 45 | 41 |
| 44 | 29 |
| 47 | 33 |
| 42 | 32 |
| 42 | 31 |
| 41 | 29 |
| 44 | 32 |
| 44 | 29 |
| 44 | 38 |
| 43 | 32 |
| 44 | 31 |
| 44 | 32 |
| 42 | 31 |
| 45 | 33 |
| 44 | 32 |
| 41 | 36 |
| 42 | 39 |
| 46 | 40 |
| 42 | 29 |
| 41 | 34 |
| 42 | 29 |
| 45 | 39 |
| 42 | 34 |
| 43 | 39 |

|    |    |
|----|----|
| 45 | 31 |
| 43 | 37 |
| 45 | 32 |
| 45 | 36 |
| 43 | 33 |
| 45 | 32 |
| 45 | 33 |
| 43 | 37 |
| 45 | 35 |
| 43 | 31 |
| 45 | 36 |
| 43 | 34 |
| 43 | 36 |
| 38 | 37 |
| 43 | 43 |
| 43 | 44 |
| 42 | 36 |
| 43 | 30 |
| 43 | 36 |
| 43 | 32 |
| 42 | 32 |
| 42 | 28 |
| 43 | 36 |
| 45 | 28 |
| 44 | 41 |
| 44 | 40 |
| 44 | 38 |
| 44 | 30 |
| 45 | 27 |
| 43 | 31 |
| 42 | 34 |
| 45 | 37 |
| 45 | 28 |
| 44 | 29 |
| 42 | 32 |
| 45 | 29 |
| 43 | 36 |
| 43 | 35 |
| 45 | 31 |
| 44 | 40 |
| 44 | 35 |
| 41 | 32 |
| 45 | 28 |
| 42 | 32 |
| 42 | 37 |
| 43 | 38 |
| 43 | 32 |
| 42 | 38 |
| 44 | 34 |
| 43 | 35 |
| 45 | 37 |
| 42 | 30 |
| 44 | 34 |
| 45 | 30 |
| 43 | 36 |
| 44 | 30 |
| 44 | 31 |
| 43 | 29 |
| 45 | 32 |

|    |    |
|----|----|
| 44 | 36 |
| 45 | 34 |
| 44 | 32 |
| 44 | 37 |
| 45 | 32 |
| 43 | 32 |
| 43 | 35 |
| 43 | 37 |
| 43 | 36 |
| 40 | 38 |
| 44 | 33 |
| 44 | 36 |
| 45 | 36 |
| 42 | 31 |
| 44 | 36 |
| 44 | 34 |
| 43 | 30 |
| 44 | 35 |
| 41 | 33 |
| 42 | 32 |
| 44 | 30 |
| 41 | 39 |
| 44 | 35 |
| 41 | 31 |
| 45 | 29 |
| 42 | 29 |
| 44 | 28 |
| 41 | 34 |
| 42 | 37 |
| 41 | 40 |
| 44 | 42 |
| 44 | 31 |
| 44 | 31 |
| 41 | 33 |
| 46 | 28 |
| 42 | 40 |
| 43 | 29 |
| 44 | 30 |
| 43 | 42 |
| 45 | 32 |
| 44 | 34 |
| 44 | 45 |
| 43 | 33 |
| 42 | 34 |
| 42 | 35 |
| 43 | 27 |
| 43 | 31 |
| 45 | 34 |
| 42 | 34 |
| 45 | 31 |
| 45 | 28 |
| 45 | 32 |
| 43 | 34 |
| 44 | 33 |
| 40 | 40 |
| 45 | 36 |
| 43 | 30 |
| 43 | 30 |
| 42 | 35 |

|    |    |
|----|----|
| 44 | 34 |
| 41 | 38 |
| 44 | 32 |
| 44 | 29 |
| 45 | 32 |
| 43 | 37 |
| 44 | 39 |
| 44 | 29 |
| 45 | 32 |
| 41 | 38 |
| 44 | 31 |
| 45 | 33 |
| 42 | 36 |
| 45 | 38 |
| 43 | 29 |
| 41 | 40 |
| 43 | 40 |
| 45 | 30 |
| 42 | 31 |
| 45 | 31 |
| 43 | 44 |
| 42 | 31 |
| 44 | 40 |
| 45 | 35 |
| 42 | 31 |
| 41 | 32 |
| 44 | 38 |
| 42 | 30 |
| 46 | 36 |
| 43 | 39 |
| 44 | 38 |
| 45 | 31 |
| 41 | 39 |
| 43 | 41 |
| 41 | 35 |
| 42 | 36 |
| 41 | 29 |
| 43 | 29 |
| 44 | 34 |
| 43 | 37 |
| 39 | 33 |
| 42 | 28 |
| 42 | 22 |
| 43 | 37 |
| 44 | 38 |
| 46 | 39 |
| 44 | 32 |
| 45 | 36 |
| 41 | 33 |
| 44 | 28 |
| 43 | 26 |
| 43 | 33 |
| 44 | 47 |
| 42 | 33 |
| 42 | 29 |
| 45 | 37 |
| 43 | 32 |
| 42 | 31 |
| 42 | 36 |

|    |    |
|----|----|
| 44 | 34 |
| 44 | 32 |
| 44 | 37 |
| 44 | 37 |
| 40 | 34 |
| 44 | 43 |
| 41 | 35 |
| 45 | 31 |
| 42 | 33 |
| 42 | 39 |
| 42 | 28 |
| 41 | 35 |
| 43 | 26 |
| 45 | 27 |
| 43 | 45 |
| 45 | 30 |
| 42 | 29 |
| 42 | 36 |
| 45 | 29 |
| 44 | 31 |
| 45 | 37 |
| 44 | 35 |
| 41 | 31 |
| 43 | 31 |
| 45 | 36 |
| 45 | 34 |
| 42 | 33 |
| 43 | 39 |
| 45 | 38 |
| 45 | 35 |
| 44 | 32 |
| 41 | 34 |
| 45 | 32 |
| 44 | 32 |
| 43 | 33 |
| 44 | 39 |
| 42 | 34 |
| 42 | 35 |
| 41 | 36 |
| 40 | 41 |
| 42 | 31 |
| 42 | 32 |
| 44 | 42 |
| 43 | 39 |
| 45 | 38 |
| 43 | 26 |
| 45 | 36 |
| 42 | 36 |
| 44 | 29 |
| 42 | 38 |
| 43 | 30 |
| 45 | 30 |
| 45 | 36 |
| 44 | 32 |
| 43 | 33 |
| 43 | 33 |
| 43 | 32 |
| 44 | 37 |
| 43 | 35 |

|    |    |
|----|----|
| 43 | 31 |
| 44 | 37 |
| 44 | 33 |
| 42 | 28 |
| 43 | 36 |
| 41 | 35 |
| 42 | 28 |
| 42 | 33 |
| 41 | 37 |
| 44 | 34 |
| 44 | 35 |
| 44 | 34 |
| 44 | 40 |
| 44 | 32 |
| 45 | 30 |
| 42 | 36 |
| 43 | 39 |
| 44 | 37 |
| 40 | 32 |
| 43 | 42 |
| 43 | 38 |
| 44 | 41 |
| 42 | 35 |
| 44 | 29 |
| 42 | 37 |
| 41 | 35 |
| 43 | 25 |
| 43 | 37 |
| 43 | 31 |
| 45 | 29 |
| 43 | 29 |
| 43 | 32 |
| 41 | 32 |
| 44 | 37 |
| 42 | 40 |
| 43 | 37 |
| 43 | 32 |
| 42 | 28 |
| 45 | 32 |
| 44 | 35 |
| 42 | 28 |
| 42 | 34 |
| 43 | 30 |
| 43 | 41 |
| 41 | 35 |
| 45 | 32 |
| 41 | 27 |
| 44 | 29 |
| 42 | 33 |
| 41 | 36 |
| 44 | 38 |
| 44 | 28 |
| 44 | 38 |
| 42 | 31 |
| 43 | 33 |
| 42 | 32 |
| 45 | 40 |
| 42 | 36 |
| 43 | 37 |

|    |    |
|----|----|
| 44 | 31 |
| 44 | 31 |
| 41 | 36 |
| 45 | 38 |
| 44 | 31 |
| 43 | 32 |
| 44 | 33 |
| 41 | 32 |
| 42 | 33 |
| 44 | 29 |
| 43 | 38 |
| 44 | 36 |
| 44 | 26 |
| 39 | 36 |
| 45 | 39 |
| 44 | 35 |
| 45 | 33 |
| 42 | 29 |
| 42 | 38 |
| 43 | 31 |
| 44 | 32 |
| 44 | 33 |
| 44 | 37 |
| 43 | 32 |
| 44 | 31 |
| 43 | 32 |
| 45 | 27 |
| 42 | 37 |
| 43 | 37 |
| 43 | 31 |
| 45 | 28 |
| 42 | 34 |
| 44 | 38 |
| 42 | 42 |
| 41 | 34 |
| 44 | 37 |
| 45 | 33 |
| 42 | 32 |
| 45 | 34 |
| 43 | 31 |
| 43 | 41 |
| 45 | 25 |
| 44 | 28 |
| 44 | 36 |
| 42 | 30 |
| 43 | 31 |
| 40 | 31 |
| 43 | 34 |
| 42 | 30 |
| 42 | 33 |
| 43 | 29 |
| 44 | 36 |
| 43 | 36 |
| 44 | 38 |
| 45 | 43 |
| 41 | 33 |
| 41 | 30 |
| 44 | 32 |
| 44 | 29 |



|    |    |
|----|----|
| 43 | 37 |
| 43 | 32 |
| 43 | 33 |
| 43 | 35 |
| 45 | 29 |
| 42 | 33 |
| 44 | 28 |
| 43 | 36 |
| 41 | 35 |
| 42 | 34 |
| 45 | 29 |
| 44 | 32 |
| 45 | 34 |
| 45 | 30 |
| 44 | 28 |
| 42 | 27 |
| 44 | 30 |
| 39 | 35 |
| 43 | 29 |
| 45 | 35 |
| 43 | 36 |
| 45 | 36 |
| 43 | 39 |
| 41 | 34 |
| 42 | 33 |
| 41 | 35 |
| 45 | 31 |
| 43 | 29 |
| 44 | 38 |
| 42 | 34 |
| 45 | 38 |
| 42 | 38 |
| 42 | 32 |
| 46 | 32 |
| 42 | 33 |
| 43 | 30 |
| 43 | 40 |
| 45 | 34 |
| 43 | 34 |
| 40 | 38 |
| 44 | 33 |
| 45 | 28 |
| 42 | 38 |
| 44 | 43 |
| 43 | 41 |
| 42 | 37 |
| 43 | 34 |
| 44 | 34 |
| 42 | 35 |
| 43 | 34 |
| 41 | 38 |
| 45 | 37 |
| 42 | 36 |
| 46 | 36 |
| 40 | 28 |
| 44 | 33 |
| 44 | 33 |
| 46 | 25 |
| 43 | 39 |

44  
44  
43  
44  
43

30  
37  
24  
37  
26

|    |    |
|----|----|
| 44 | 26 |
| 42 | 34 |
| 44 | 36 |
| 46 | 28 |
| 44 | 34 |
| 43 | 38 |
| 45 | 41 |
| 44 | 29 |
| 47 | 33 |
| 42 | 32 |
| 42 | 31 |
| 41 | 29 |
| 44 | 32 |
| 44 | 29 |
| 44 | 38 |
| 43 | 32 |

|    |    |
|----|----|
| 44 | 31 |
| 44 | 32 |
| 42 | 31 |
| 45 | 33 |
| 44 | 32 |
| 41 | 36 |
| 42 | 39 |
| 46 | 40 |
| 42 | 29 |
| 41 | 34 |
| 42 | 29 |
| 45 | 39 |
| 42 | 34 |
| 43 | 39 |
| 45 | 31 |
| 43 | 37 |
| 45 | 32 |
| 45 | 36 |
| 43 | 33 |
| 45 | 32 |
| 45 | 33 |
| 43 | 37 |
| 45 | 35 |
| 43 | 31 |
| 45 | 36 |
| 43 | 34 |
| 43 | 36 |
| 38 | 37 |
| 43 | 43 |
| 43 | 44 |
| 42 | 36 |
| 43 | 30 |
| 43 | 36 |
| 43 | 32 |
| 42 | 32 |
| 42 | 28 |
| 43 | 36 |
| 45 | 28 |
| 44 | 41 |
| 44 | 40 |
| 44 | 38 |
| 44 | 30 |
| 45 | 27 |
| 43 | 31 |
| 42 | 34 |
| 45 | 37 |
| 45 | 28 |
| 44 | 29 |
| 42 | 32 |
| 45 | 29 |
| 43 | 36 |
| 43 | 35 |
| 45 | 31 |
| 44 | 40 |
| 44 | 35 |
| 41 | 32 |
| 45 | 28 |
| 42 | 32 |
| 42 | 37 |

|    |    |
|----|----|
| 43 | 38 |
| 43 | 32 |
| 42 | 38 |
| 44 | 34 |
| 43 | 35 |
| 45 | 37 |
| 42 | 30 |
| 44 | 34 |
| 45 | 30 |
| 43 | 36 |
| 44 | 30 |
| 44 | 31 |
| 43 | 29 |
| 45 | 32 |
| 44 | 36 |
| 45 | 34 |
| 44 | 32 |
| 44 | 37 |
| 45 | 32 |
| 43 | 32 |
| 43 | 35 |
| 43 | 37 |
| 43 | 36 |
| 40 | 38 |
| 44 | 33 |
| 44 | 36 |
| 45 | 36 |
| 42 | 31 |
| 44 | 36 |
| 44 | 34 |
| 43 | 30 |
| 44 | 35 |
| 41 | 33 |
| 42 | 32 |
| 44 | 30 |
| 41 | 39 |
| 44 | 35 |
| 41 | 31 |
| 45 | 29 |
| 42 | 29 |
| 44 | 28 |
| 41 | 34 |
| 42 | 37 |
| 41 | 40 |
| 44 | 42 |
| 44 | 31 |
| 44 | 31 |
| 41 | 33 |
| 46 | 28 |
| 42 | 40 |
| 43 | 29 |
| 44 | 30 |
| 43 | 42 |
| 45 | 32 |
| 44 | 34 |
| 44 | 45 |
| 43 | 33 |
| 42 | 34 |
| 42 | 35 |

|    |    |
|----|----|
| 43 | 27 |
| 43 | 31 |
| 45 | 34 |
| 42 | 34 |
| 45 | 31 |
| 45 | 28 |
| 45 | 32 |
| 43 | 34 |
| 44 | 33 |
| 40 | 40 |
| 45 | 36 |
| 43 | 30 |
| 43 | 30 |
| 42 | 35 |
| 44 | 34 |
| 41 | 38 |
| 44 | 32 |
| 44 | 29 |
| 45 | 32 |
| 43 | 37 |
| 44 | 39 |
| 44 | 29 |
| 45 | 32 |
| 41 | 38 |
| 44 | 31 |
| 45 | 33 |
| 42 | 36 |
| 45 | 38 |
| 43 | 29 |
| 41 | 40 |
| 43 | 40 |
| 45 | 30 |
| 42 | 31 |
| 45 | 31 |
| 43 | 44 |
| 42 | 31 |
| 44 | 40 |
| 45 | 35 |
| 42 | 31 |
| 41 | 32 |
| 44 | 38 |
| 42 | 30 |
| 46 | 36 |
| 43 | 39 |
| 44 | 38 |
| 45 | 31 |
| 41 | 39 |
| 43 | 41 |
| 41 | 35 |
| 42 | 36 |
| 41 | 29 |
| 43 | 29 |
| 44 | 34 |
| 43 | 37 |
| 39 | 33 |
| 42 | 28 |
| 42 | 22 |
| 43 | 37 |
| 44 | 38 |

|    |    |
|----|----|
| 46 | 39 |
| 44 | 32 |
| 45 | 36 |
| 41 | 33 |
| 44 | 28 |
| 43 | 26 |
| 43 | 33 |
| 44 | 47 |
| 42 | 33 |
| 42 | 29 |
| 45 | 37 |
| 43 | 32 |
| 42 | 31 |
| 42 | 36 |
| 44 | 34 |
| 44 | 32 |
| 44 | 37 |
| 44 | 37 |
| 40 | 34 |
| 44 | 43 |
| 41 | 35 |
| 45 | 31 |
| 42 | 33 |
| 42 | 39 |
| 42 | 28 |
| 41 | 35 |
| 43 | 26 |
| 45 | 27 |
| 43 | 45 |
| 45 | 30 |
| 42 | 29 |
| 42 | 36 |
| 45 | 29 |
| 44 | 31 |
| 45 | 37 |
| 44 | 35 |
| 41 | 31 |
| 43 | 31 |
| 45 | 36 |
| 45 | 34 |
| 42 | 33 |
| 43 | 39 |
| 45 | 38 |
| 45 | 35 |
| 44 | 32 |
| 41 | 34 |
| 45 | 32 |
| 44 | 32 |
| 43 | 33 |
| 44 | 39 |
| 42 | 34 |
| 42 | 35 |
| 41 | 36 |
| 40 | 41 |
| 42 | 31 |
| 42 | 32 |
| 44 | 42 |
| 43 | 39 |
| 45 | 38 |

|    |    |
|----|----|
| 43 | 26 |
| 45 | 36 |
| 42 | 36 |
| 44 | 29 |
| 42 | 38 |
| 43 | 30 |
| 45 | 30 |
| 45 | 36 |
| 44 | 32 |
| 43 | 33 |
| 43 | 33 |
| 43 | 32 |
| 44 | 37 |
| 43 | 35 |
| 43 | 31 |
| 44 | 37 |
| 44 | 33 |
| 42 | 28 |
| 43 | 36 |
| 41 | 35 |
| 42 | 28 |
| 42 | 33 |
| 41 | 37 |
| 44 | 34 |
| 44 | 35 |
| 44 | 34 |
| 44 | 40 |
| 44 | 32 |
| 45 | 30 |
| 42 | 36 |
| 43 | 39 |
| 44 | 37 |
| 40 | 32 |
| 43 | 42 |
| 43 | 38 |
| 44 | 41 |
| 42 | 35 |
| 44 | 29 |
| 42 | 37 |
| 41 | 35 |
| 43 | 25 |
| 43 | 37 |
| 43 | 31 |
| 45 | 29 |
| 43 | 29 |
| 43 | 32 |
| 41 | 32 |
| 44 | 37 |
| 42 | 40 |
| 43 | 37 |
| 43 | 32 |
| 42 | 28 |
| 45 | 32 |
| 44 | 35 |
| 42 | 28 |
| 42 | 34 |
| 43 | 30 |
| 43 | 41 |
| 41 | 35 |



|    |    |
|----|----|
| 45 | 32 |
| 41 | 27 |
| 44 | 29 |
| 42 | 33 |
| 41 | 36 |
| 44 | 38 |
| 44 | 28 |
| 44 | 38 |
| 42 | 31 |
| 43 | 33 |
| 42 | 32 |
| 45 | 40 |
| 42 | 36 |
| 43 | 37 |
| 44 | 31 |
| 44 | 31 |
| 41 | 36 |
| 45 | 38 |
| 44 | 31 |
| 43 | 32 |
| 44 | 33 |
| 41 | 32 |
| 42 | 33 |
| 44 | 29 |
| 43 | 38 |
| 44 | 36 |
| 44 | 26 |
| 39 | 36 |
| 45 | 39 |
| 44 | 35 |
| 45 | 33 |
| 42 | 29 |
| 42 | 38 |
| 43 | 31 |
| 44 | 32 |
| 44 | 33 |
| 44 | 37 |
| 43 | 32 |
| 44 | 31 |
| 43 | 32 |
| 45 | 27 |
| 42 | 37 |
| 43 | 37 |
| 43 | 31 |
| 45 | 28 |
| 42 | 34 |
| 44 | 38 |
| 42 | 42 |
| 41 | 34 |
| 44 | 37 |
| 45 | 33 |
| 42 | 32 |
| 45 | 34 |
| 43 | 31 |
| 43 | 41 |
| 45 | 25 |
| 44 | 28 |
| 44 | 36 |
| 42 | 30 |

|    |    |
|----|----|
| 43 | 31 |
| 40 | 31 |
| 43 | 34 |
| 42 | 30 |
| 42 | 33 |
| 43 | 29 |
| 44 | 36 |
| 43 | 36 |
| 44 | 38 |
| 45 | 43 |
| 41 | 33 |
| 41 | 30 |
| 44 | 32 |
| 44 | 29 |
| 43 | 37 |
| 43 | 32 |
| 43 | 33 |
| 43 | 35 |
| 45 | 29 |
| 42 | 33 |
| 44 | 28 |
| 43 | 36 |
| 41 | 35 |
| 42 | 34 |
| 45 | 29 |
| 44 | 32 |
| 45 | 34 |
| 45 | 30 |
| 44 | 28 |
| 42 | 27 |
| 44 | 30 |
| 39 | 35 |
| 43 | 29 |
| 45 | 35 |
| 43 | 36 |
| 45 | 36 |
| 43 | 39 |
| 41 | 34 |
| 42 | 33 |
| 41 | 35 |
| 45 | 31 |
| 43 | 29 |
| 44 | 38 |
| 42 | 34 |
| 45 | 38 |
| 42 | 38 |
| 42 | 32 |
| 46 | 32 |
| 42 | 33 |
| 43 | 30 |
| 43 | 40 |
| 45 | 34 |
| 43 | 34 |
| 40 | 38 |
| 44 | 33 |
| 45 | 28 |
| 42 | 38 |
| 44 | 43 |
| 43 | 41 |

|    |    |
|----|----|
| 42 | 37 |
| 43 | 34 |
| 44 | 34 |
| 42 | 35 |
| 43 | 34 |
| 41 | 38 |
| 45 | 37 |
| 42 | 36 |
| 46 | 36 |
| 40 | 28 |
| 44 | 33 |
| 44 | 33 |
| 46 | 25 |
| 43 | 39 |
| 44 | 30 |
| 44 | 37 |
| 43 | 24 |
| 44 | 37 |
| 43 | 26 |



|                        |                         |                        |
|------------------------|-------------------------|------------------------|
| 9                      | 10                      | 11                     |
| TGAGGTAGTAGGTTGTATAGTT | AACATTCAACGCTGTCGGTGAGT | TAGCAGCACGTAAATATTGGCG |
| let-7a-5p              | miR-181a-5p             | miR-16-5p              |
| 8839402                | 8658137                 | 7939871                |
| 1.72                   | 2.00                    | 0.25                   |
| 1.83                   | 0.60                    | 1.32                   |
| 3.13                   | 1.47                    | 2.02                   |
| 2.31                   | 1.05                    | 0.56                   |
| 5.24                   | 2.09                    | 1.80                   |
| 3.37                   | 1.76                    | 0.60                   |
| 2.83                   | 3.10                    | 0.18                   |
| 1.76                   | 2.75                    | 0.20                   |
| 2.32                   | 1.02                    | 1.00                   |
| 1.92                   | 0.68                    | 1.06                   |
| 1.58                   | 1.26                    | 1.62                   |
| 2.12                   | 2.41                    | 0.15                   |
| 2.00                   | 1.94                    | 2.99                   |
| 2.23                   | 2.96                    | 0.24                   |
| 2.05                   | 1.72                    | 1.88                   |
| 1.73                   | 1.78                    | 2.67                   |
| 2.82                   | 3.77                    | 0.40                   |
| 1.28                   | 2.21                    | 2.45                   |
| 1.15                   | 2.27                    | 1.26                   |
| 1.32                   | 1.90                    | 4.28                   |
| 2.15                   | 2.37                    | 0.86                   |
| 2.69                   | 3.41                    | 0.16                   |
| 2.95                   | 3.26                    | 0.28                   |
| 2.67                   | 3.24                    | 0.24                   |
| 5.40                   | 2.47                    | 0.33                   |
| 2.89                   | 3.76                    | 0.49                   |
| 2.64                   | 1.14                    | 2.91                   |
| 2.05                   | 0.54                    | 5.71                   |
| 1.42                   | 0.83                    | 0.96                   |
| 1.11                   | 0.62                    | 0.55                   |
| 2.15                   | 0.57                    | 0.20                   |
| 1.73                   | 0.57                    | 1.06                   |
| 4.58                   | 1.02                    | 5.05                   |
| 1.77                   | 3.13                    | 0.37                   |
| 1.48                   | 2.53                    | 0.72                   |
| 2.05                   | 2.45                    | 0.25                   |
| 1.28                   | 1.25                    | 0.13                   |
| 1.42                   | 2.60                    | 0.71                   |
| 1.05                   | 2.40                    | 1.63                   |
| 1.79                   | 3.97                    | 0.43                   |
| 0.55                   | 4.18                    | 0.13                   |
| 0.37                   | 6.13                    | 0.07                   |
| 1.83                   | 2.87                    | 0.50                   |
| 1.12                   | 1.46                    | 1.60                   |
| 0.83                   | 2.29                    | 0.48                   |
| 0.28                   | 5.43                    | 0.18                   |
| 1.55                   | 2.13                    | 2.43                   |
| 2.20                   | 3.94                    | 0.50                   |
| 1.10                   | 2.30                    | 1.80                   |
| 1.35                   | 2.80                    | 0.87                   |

|      |      |      |
|------|------|------|
| 1.14 | 3.08 | 2.09 |
| 2.44 | 1.66 | 0.28 |
| 3.06 | 1.19 | 0.51 |
| 2.56 | 1.72 | 0.99 |
| 2.44 | 1.95 | 0.48 |
| 2.43 | 2.06 | 0.60 |
| 2.17 | 1.41 | 1.29 |
| 1.73 | 1.65 | 4.97 |
| 2.68 | 4.46 | 0.36 |
| 3.80 | 3.43 | 1.44 |
| 3.81 | 3.15 | 1.79 |
| 1.68 | 1.28 | 5.69 |
| 2.71 | 2.72 | 0.37 |
| 3.21 | 1.99 | 0.70 |
| 3.43 | 1.84 | 2.27 |
| 2.49 | 3.15 | 0.36 |
| 0.63 | 0.55 | 3.85 |
| 1.50 | 0.65 | 0.55 |
| 6.97 | 2.66 | 0.86 |
| 3.38 | 3.02 | 1.34 |
| 1.98 | 1.38 | 0.38 |
| 0.64 | 0.98 | 6.05 |
| 2.35 | 1.27 | 1.89 |
| 1.97 | 2.11 | 1.97 |
| 0.48 | 4.04 | 0.01 |
| 2.10 | 1.87 | 1.76 |
| 1.42 | 1.47 | 1.19 |
| 2.04 | 1.43 | 1.30 |
| 2.57 | 1.19 | 2.72 |
| 1.82 | 1.49 | 3.91 |
| 2.22 | 1.96 | 0.92 |
| 2.44 | 2.00 | 1.59 |
| 1.11 | 2.90 | 0.33 |
| 1.10 | 2.43 | 3.51 |
| 1.60 | 1.12 | 6.56 |
| 0.85 | 2.31 | 1.07 |
| 1.75 | 2.41 | 1.24 |
| 1.91 | 2.07 | 1.11 |
| 1.58 | 1.70 | 2.41 |
| 1.80 | 1.77 | 1.04 |
| 4.09 | 1.86 | 1.69 |
| 1.79 | 1.78 | 0.29 |
| 3.37 | 3.72 | 0.33 |
| 3.03 | 1.75 | 1.06 |
| 1.60 | 2.31 | 1.29 |
| 0.00 | 0.00 | 0.00 |
| 0.00 | 0.00 | 0.00 |
| 0.00 | 0.00 | 0.00 |







10

11

12

---

*C\_41*

*C\_42*

*C\_44*

---

|       |       |       |
|-------|-------|-------|
| 0.40  |       |       |
| -0.37 | -0.35 |       |
| 0.11  | 0.10  | -0.24 |
| -0.26 | -0.40 | 0.44  |
| 0.26  | -0.01 | -0.36 |
| -0.05 | 0.32  | -0.31 |
| -0.36 | -0.28 | 0.07  |
| 0.02  | -0.24 | -0.17 |
| -0.04 | 0.25  | -0.19 |
| 0.12  | 0.16  | -0.20 |
| 0.05  | -0.06 | 0.17  |
| -0.63 | -0.41 | 0.52  |
| -0.66 | -0.47 | 0.38  |
| -0.39 | -0.52 | 0.48  |
| -0.15 | 0.01  | -0.06 |
| -0.28 | 0.03  | -0.05 |
| 0.31  | 0.32  | -0.45 |
| 0.26  | 0.24  | -0.24 |
| 0.12  | 0.52  | -0.24 |
| 0.56  | 0.49  | -0.28 |
| 0.24  | -0.05 | -0.09 |
| 0.41  | 0.63  | -0.30 |
| 0.15  | 0.27  | -0.29 |
| -0.25 | -0.29 | 0.11  |
| 0.03  | -0.25 | -0.16 |
| -0.31 | -0.17 | 0.40  |
| 0.03  | -0.25 | 0.50  |
| 0.19  | 0.07  | -0.18 |
| 0.27  | 0.18  | -0.33 |
| -0.40 | -0.03 | 0.34  |
| -0.17 | -0.28 | 0.00  |
| -0.16 | -0.19 | -0.01 |
| -0.39 | -0.11 | 0.03  |
| 0.17  | 0.06  | -0.36 |
| -0.35 | -0.20 | 0.45  |
| -0.16 | -0.31 | 0.16  |
| -0.23 | 0.33  | -0.27 |
| -0.63 | -0.23 | 0.22  |
| -0.18 | -0.05 | -0.04 |
| -0.39 | -0.11 | 0.15  |
| -0.24 | 0.05  | -0.13 |
| -0.26 | -0.10 | -0.13 |
| -0.05 | -0.15 | -0.22 |
| -0.28 | -0.04 | -0.18 |
| -0.34 | -0.21 | 0.44  |

|       |       |       |
|-------|-------|-------|
| -0.13 | -0.09 | -0.14 |
| -0.01 | -0.07 | -0.16 |
| 0.23  | 0.14  | -0.21 |
| -0.50 | -0.24 | 0.32  |
| -0.33 | 0.01  | -0.05 |
| -0.14 | 0.13  | -0.12 |
| 0.37  | 0.20  | -0.27 |
| -0.03 | -0.23 | 0.11  |
| -0.08 | -0.13 | 0.16  |
| 0.22  | 0.23  | -0.29 |
| -0.04 | -0.19 | 0.27  |
| 0.51  | 0.18  | -0.43 |
| 0.36  | 0.38  | -0.23 |
| -0.04 | -0.33 | 0.01  |
| -0.26 | -0.15 | -0.13 |
| -0.01 | -0.37 | 0.22  |
| 0.14  | 0.13  | 0.04  |
| 0.49  | 0.05  | -0.09 |
| 0.20  | 0.01  | -0.04 |
| -0.13 | -0.22 | 0.00  |
| -0.14 | -0.14 | 0.16  |
| 0.20  | 0.45  | -0.23 |
| 0.02  | 0.19  | 0.13  |
| 0.15  | 0.30  | -0.51 |
| -0.07 | 0.49  | -0.41 |
| -0.11 | 0.15  | -0.24 |
| -0.11 | 0.27  | -0.25 |
| -0.46 | -0.25 | 0.51  |
| 0.15  | 0.14  | -0.20 |
| 0.26  | 0.11  | -0.19 |
| -0.30 | 0.17  | -0.04 |
| -0.36 | 0.08  | -0.07 |
| -0.06 | 0.09  | -0.05 |
| 0.08  | 0.22  | -0.21 |
| -0.24 | 0.16  | -0.08 |
| 0.17  | 0.19  | -0.08 |
| -0.07 | -0.14 | 0.13  |
| -0.62 | -0.43 | 0.35  |
| 0.16  | 0.43  | -0.35 |
| 0.34  | 0.16  | -0.38 |

|                        |                        |                         |
|------------------------|------------------------|-------------------------|
| 8                      | 9                      | 10                      |
| 110                    | 111                    | 112                     |
| TGGAGAGAAAGGCAGTTCCTGA | ACCATCGACCGTTGATTGTACC | TCCCCCAGGTGTGATTCTGATTT |
| miR-185-5p             | miR-181a-3p            | miR-361-3p              |
| 23397                  | 23176                  | 20718                   |
| -0.68                  | -0.85                  | 1.41                    |
| -0.74                  | -0.38                  | 0.02                    |
| 0.66                   | -0.11                  | -0.04                   |
| -0.60                  | -0.91                  | -0.51                   |
| -0.24                  | -0.47                  | -0.17                   |
| -0.93                  | -1.21                  | -1.56                   |
| -0.93                  | -0.83                  | 0.50                    |
| -0.97                  | -0.40                  | -0.74                   |
| -0.65                  | -0.80                  | -1.54                   |
| 0.96                   | -0.84                  | -1.36                   |
| -0.13                  | 0.90                   | -0.64                   |
| -1.13                  | -0.28                  | -0.03                   |
| 1.87                   | 1.90                   | -0.82                   |
| -0.87                  | -0.64                  | -0.03                   |
| 1.16                   | 0.54                   | 0.25                    |
| 0.41                   | 1.25                   | 0.04                    |
| -0.46                  | -0.18                  | 0.92                    |
| 0.98                   | 2.26                   | -0.36                   |
| -0.20                  | 1.80                   | 0.41                    |
| 2.88                   | 1.94                   | -0.35                   |

|       |       |       |
|-------|-------|-------|
| -0.77 | -0.22 | -0.11 |
| -0.29 | -0.25 | 1.91  |
| -0.18 | -0.33 | 2.64  |
| -0.49 | -0.94 | 1.15  |
| -0.52 | -0.16 | -0.19 |
| 0.38  | -0.34 | 0.47  |
| 1.47  | -0.44 | -1.29 |
| 2.23  | 0.32  | -1.54 |
| -0.60 | 1.55  | -0.17 |
| -0.63 | -0.07 | -0.88 |
| -1.01 | -1.09 | -0.16 |
| -0.01 | 0.77  | -0.90 |
| 1.24  | 0.08  | -1.42 |
| -0.80 | -0.59 | 0.37  |
| -0.40 | 0.28  | -0.13 |
| -0.87 | -0.07 | 1.91  |
| -1.24 | -1.26 | -1.43 |
| -0.51 | 0.50  | -0.17 |
| 0.38  | 2.67  | -0.16 |
| -0.65 | 1.27  | 0.66  |
| 4.78  | -1.40 | 1.57  |
| 5.90  | -0.92 | 2.86  |
| -0.82 | -0.38 | 0.39  |
| 2.47  | 0.55  | 0.20  |
| -0.98 | 1.16  | 0.82  |
| 2.35  | -1.45 | 0.74  |
| -0.25 | 0.92  | 0.35  |
| -0.17 | 0.65  | 0.90  |
| 0.15  | 0.74  | -0.05 |
| -0.34 | 0.99  | 2.50  |
| 0.51  | 2.30  | 0.45  |
| -0.71 | -0.77 | 1.07  |
| -0.61 | -1.08 | -0.04 |
| 0.60  | -0.29 | 2.02  |
| -1.04 | -0.39 | 0.24  |
| -0.75 | -0.36 | 0.09  |
| -0.45 | -0.75 | -0.34 |
| 8.04  | 1.39  | -0.72 |
| 0.14  | 0.68  | 1.59  |
| 0.90  | 1.48  | 0.34  |
| 1.51  | 0.96  | 0.81  |
| 6.51  | 0.22  | -1.36 |
| -0.52 | -1.20 | -0.68 |
| 0.28  | -0.82 | -0.68 |
| 1.56  | -0.28 | -1.21 |
| 0.65  | 1.43  | 0.88  |
| 0.23  | -0.60 | -1.29 |
| -1.34 | 0.23  | -0.52 |
| -0.07 | -0.52 | 1.54  |
| 0.40  | 1.40  | 2.17  |
| -0.47 | -0.87 | -0.08 |
| -0.56 | 1.52  | -1.41 |
| -0.18 | -0.56 | -1.68 |
| 1.75  | 0.95  | -0.36 |
| -0.36 | -1.10 | 8.02  |
| 0.96  | 0.38  | 0.26  |
| -0.52 | 1.73  | -0.16 |
| -0.77 | 0.38  | -0.59 |
| 1.69  | 2.25  | -0.22 |

|       |       |       |
|-------|-------|-------|
| -0.17 | 0.97  | -0.29 |
| -0.45 | -0.73 | -0.31 |
| -0.35 | 0.42  | -0.03 |
| -0.61 | -0.54 | 0.52  |
| 3.05  | 2.86  | 0.26  |
| 3.74  | 1.60  | -1.34 |
| 0.37  | 0.58  | 0.75  |
| -0.19 | 0.91  | 1.08  |
| -0.43 | -0.67 | -0.26 |
| 0.38  | 1.77  | 0.42  |
| -0.29 | -0.08 | 1.32  |
| 2.34  | 0.99  | -0.62 |
| -1.03 | -0.58 | 0.28  |
| -0.62 | 0.47  | 0.83  |
| 0.70  | -0.09 | -1.03 |
| 0.92  | -0.44 | -0.77 |

|      |      |      |
|------|------|------|
| -1   | -2   | -2   |
| 0.00 | 0.00 | 0.00 |
| 1.00 | 1.00 | 1.00 |
| 0.33 | 0.20 | 0.85 |

|                        |                        |                        |
|------------------------|------------------------|------------------------|
| 110                    | 111                    | 112                    |
| TGGAGAGAAAGGCAGTTCCTGA | ACCATCGACCGTTGATTGTACC | TCCCCAGGTGTGATTCTGATTT |
| miR-185-5p             | miR-181a-3p            | miR-361-3p             |
| 23397                  | 23176                  | 20718                  |
| -0.68                  | -0.85                  | 1.41                   |
| -0.74                  | -0.38                  | 0.02                   |
| 0.66                   | -0.11                  | -0.04                  |
| -0.60                  | -0.91                  | -0.51                  |
| -0.24                  | -0.47                  | -0.17                  |
| -0.93                  | -1.21                  | -1.56                  |
| -0.93                  | -0.83                  | 0.50                   |
| -0.97                  | -0.40                  | -0.74                  |
| -0.65                  | -0.80                  | -1.54                  |
| 0.96                   | -0.84                  | -1.36                  |
| -0.13                  | 0.90                   | -0.64                  |
| -1.13                  | -0.28                  | -0.03                  |
| 1.87                   | 1.90                   | -0.82                  |
| -0.87                  | -0.64                  | -0.03                  |
| 1.16                   | 0.54                   | 0.25                   |
| 0.41                   | 1.25                   | 0.04                   |
| -0.46                  | -0.18                  | 0.92                   |
| 0.98                   | 2.26                   | -0.36                  |
| -0.20                  | 1.80                   | 0.41                   |
| 2.88                   | 1.94                   | -0.35                  |
| -0.77                  | -0.22                  | -0.11                  |
| -0.29                  | -0.25                  | 1.91                   |
| -0.18                  | -0.33                  | 2.64                   |
| -0.49                  | -0.94                  | 1.15                   |
| -0.52                  | -0.16                  | -0.19                  |
| 0.38                   | -0.34                  | 0.47                   |
| 1.47                   | -0.44                  | -1.29                  |
| 2.23                   | 0.32                   | -1.54                  |

|       |       |       |
|-------|-------|-------|
| -0.60 | 1.55  | -0.17 |
| -0.63 | -0.07 | -0.88 |
| -1.01 | -1.09 | -0.16 |
| -0.01 | 0.77  | -0.90 |
| 1.24  | 0.08  | -1.42 |
| -0.80 | -0.59 | 0.37  |
| -0.40 | 0.28  | -0.13 |
| -0.87 | -0.07 | 1.91  |
| -1.24 | -1.26 | -1.43 |
| -0.51 | 0.50  | -0.17 |
| 0.38  | 2.67  | -0.16 |
| -0.65 | 1.27  | 0.66  |
| 4.78  | -1.40 | 1.57  |
| 5.90  | -0.92 | 2.86  |
| -0.82 | -0.38 | 0.39  |
| 2.47  | 0.55  | 0.20  |
| -0.98 | 1.16  | 0.82  |
| 2.35  | -1.45 | 0.74  |
| -0.25 | 0.92  | 0.35  |
| -0.17 | 0.65  | 0.90  |
| 0.15  | 0.74  | -0.05 |
| -0.34 | 0.99  | 2.50  |
| 0.51  | 2.30  | 0.45  |
| -0.71 | -0.77 | 1.07  |
| -0.61 | -1.08 | -0.04 |
| 0.60  | -0.29 | 2.02  |
| -1.04 | -0.39 | 0.24  |
| -0.75 | -0.36 | 0.09  |
| -0.45 | -0.75 | -0.34 |
| 8.04  | 1.39  | -0.72 |
| 0.14  | 0.68  | 1.59  |
| 0.90  | 1.48  | 0.34  |
| 1.51  | 0.96  | 0.81  |
| 6.51  | 0.22  | -1.36 |
| -0.52 | -1.20 | -0.68 |
| 0.28  | -0.82 | -0.68 |
| 1.56  | -0.28 | -1.21 |
| 0.65  | 1.43  | 0.88  |
| 0.23  | -0.60 | -1.29 |
| -1.34 | 0.23  | -0.52 |
| -0.07 | -0.52 | 1.54  |
| 0.40  | 1.40  | 2.17  |
| -0.47 | -0.87 | -0.08 |
| -0.56 | 1.52  | -1.41 |
| -0.18 | -0.56 | -1.68 |
| 1.75  | 0.95  | -0.36 |
| -0.36 | -1.10 | 8.02  |
| 0.96  | 0.38  | 0.26  |
| -0.52 | 1.73  | -0.16 |
| -0.77 | 0.38  | -0.59 |
| 1.69  | 2.25  | -0.22 |
| -0.17 | 0.97  | -0.29 |
| -0.45 | -0.73 | -0.31 |
| -0.35 | 0.42  | -0.03 |
| -0.61 | -0.54 | 0.52  |
| 3.05  | 2.86  | 0.26  |
| 3.74  | 1.60  | -1.34 |
| 0.37  | 0.58  | 0.75  |
| -0.19 | 0.91  | 1.08  |

|       |       |       |
|-------|-------|-------|
| -0.43 | -0.67 | -0.26 |
| 0.38  | 1.77  | 0.42  |
| -0.29 | -0.08 | 1.32  |
| 2.34  | 0.99  | -0.62 |
| -1.03 | -0.58 | 0.28  |
| -0.62 | 0.47  | 0.83  |
| 0.70  | -0.09 | -1.03 |
| 1     | 0     | -1    |

---

|                       |                      |                       |
|-----------------------|----------------------|-----------------------|
| 110                   | 111                  | 112                   |
| 46                    | 101                  | 80                    |
| AGCTACATCTGGCTACTGGGT | GCCCTGGGCCTATCCTAGAA | ATCACATTGCCAGGGATTACC |
| miR-222-3p            | miR-331-3p           | miR-23b-3p            |
| 221365                | 26325.00             | 53026                 |
| 0.56                  | 4.12                 | 0.09                  |
| -0.96                 | -1.02                | -0.50                 |
| -0.09                 | 0.00                 | -1.08                 |
| -0.40                 | -0.06                | -1.12                 |
| -0.45                 | 0.08                 | 2.84                  |
| 1.34                  | -0.99                | -0.09                 |
| 1.65                  | -0.14                | 0.59                  |
| -0.92                 | -0.46                | -0.77                 |
| -1.72                 | -0.51                | -0.80                 |
| -1.64                 | -0.14                | 0.17                  |
| -0.47                 | -0.59                | 1.04                  |
| 0.20                  | -0.95                | -1.08                 |
| 0.88                  | -0.08                | 1.46                  |
| -1.51                 | 0.11                 | -0.46                 |
| -0.48                 | 0.56                 | -0.59                 |
| 1.01                  | -0.43                | 2.25                  |
| -0.21                 | 0.47                 | 0.04                  |
| -0.88                 | 1.30                 | 1.06                  |
| 0.37                  | 1.24                 | -0.57                 |
| 0.37                  | -0.39                | -0.85                 |
| 0.72                  | -0.77                | -0.28                 |
| 1.82                  | -0.27                | -0.56                 |
| 1.48                  | -0.11                | -0.03                 |
| 0.47                  | -0.20                | -0.11                 |
| -0.96                 | -0.59                | -0.22                 |
| 0.45                  | 0.03                 | 0.45                  |
| -0.62                 | -0.23                | -0.90                 |
| -1.11                 | -0.50                | -1.07                 |
| 1.40                  | -0.38                | -0.73                 |
| -0.92                 | -0.08                | -1.05                 |
| -1.38                 | -0.46                | -0.81                 |
| 0.51                  | -0.05                | -1.08                 |
| -1.78                 | 0.58                 | 1.72                  |
| 1.29                  | 1.00                 | -0.49                 |
| 0.40                  | 2.00                 | 0.51                  |
| 2.02                  | 0.67                 | 0.03                  |
| -1.26                 | -0.94                | -1.06                 |
| -0.22                 | 0.54                 | 2.57                  |
| 0.02                  | 1.55                 | 2.06                  |



|       |       |       |
|-------|-------|-------|
| 0.42  | 0.32  | -0.17 |
| -0.04 | 6.21  | -0.47 |
| 7.71  | 6.75  | 0.73  |
| 0.33  | -0.07 | 0.17  |
| -0.99 | 0.59  | 0.30  |
| -0.07 | -0.57 | -0.58 |
| -1.28 | 2.37  | -0.96 |
| 3.70  | -0.23 | -0.37 |
| 3.47  | -0.24 | 0.33  |
| 1.02  | -0.34 | -0.26 |
| 1.87  | -0.36 | -0.58 |
| 2.38  | -0.33 | 0.52  |
| 3.13  | 0.48  | 1.11  |
| 1.13  | 0.50  | 0.63  |
| 1.27  | 0.01  | 0.65  |
| 4.19  | -0.73 | -0.66 |
| 0.59  | 0.14  | -0.05 |
| 0.81  | -0.59 | -0.35 |
| -1.18 | -0.62 | -0.92 |
| 1.34  | -0.21 | -0.58 |
| 3.04  | -0.30 | 0.53  |
| 0.71  | 0.07  | 0.52  |
| -1.74 | -0.65 | -1.15 |
| -1.13 | -0.34 | -1.03 |
| 0.12  | -0.65 | -0.89 |
| -1.15 | -0.63 | -1.09 |
| -0.33 | -0.61 | -1.24 |
| -0.94 | 0.83  | -0.42 |
| -0.36 | -0.59 | 0.33  |
| 0.79  | 2.93  | -0.04 |
| 4.54  | 1.23  | -0.53 |
| 0.98  | -0.18 | -1.06 |
| -0.94 | -0.93 | -1.16 |
| -1.21 | -0.65 | -0.37 |
| -0.07 | -0.33 | 0.03  |
| 2.97  | 15.97 | 0.68  |
| -0.06 | -0.67 | -0.44 |
| -0.84 | 0.37  | -0.61 |
| -1.04 | -0.97 | -0.74 |
| 1.23  | 1.99  | 0.64  |
| 0.93  | -0.27 | 0.02  |
| -0.42 | -0.05 | -0.24 |
| 1.56  | -0.33 | -0.36 |
| 0.27  | -0.90 | -0.33 |
| -0.07 | -0.08 | 0.53  |
| -1.45 | -0.69 | -1.10 |
| 2.03  | 0.25  | -0.09 |
| 1.79  | -0.20 | -0.33 |
| 0.40  | -0.60 | -0.55 |
| 0.69  | -0.15 | -0.55 |
| 1.11  | 0.34  | -0.17 |
| -1.58 | -0.96 | -1.14 |
| -0.23 | -0.43 | -0.74 |
| 1.56  | -0.24 | -0.60 |
| -1.16 | -0.73 | -0.53 |
| -0.89 | 0.44  | 0.31  |
| 0.90  | 1.00  | 1.00  |
| 0.53  | 0.33  | 1.00  |











































































































































































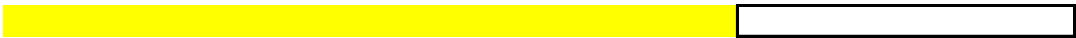

P  
20  
19  
20  
21  
20  
24  
19  
21  
19  
16  
17  
19  
20  
17  
20  
23  
18  
19  
21  
21  
18  
19  
22  
20  
16  
24  
16  
15  
19  
19  
20  
20  
20  
21  
18  
16  
18  
18  
20  
21  
20  
18  
21  
19  
19  
20  
21  
19  
19  
20  
18

|     |
|-----|
|     |
| ave |
| sd  |

17  
20  
16  
24  
20  
19  
19  
15  
20  
19  
16  
17  
18  
20  
20  
19  
16  
19  
20  
21  
18  
19  
16  
23  
16  
18  
19  
18  
18  
18  
18  
21  
17  
19  
23  
18  
20  
22  
21  
19  
17  
17  
19  
21  
17  
19  
21  
21  
18  
17  
20  
18  
19  
18  
19  
18  
20  
17

14  
14  
18  
18  
20  
17  
18  
14  
16  
19  
18  
20  
19  
20  
20  
21  
19  
18  
18  
23  
20  
16  
18  
17  
20  
18  
19  
18  
20  
15  
15  
18  
20  
18  
17  
21  
17  
18  
20  
19  
19  
18  
15  
20  
20  
17  
16  
18  
16  
18  
20  
17  
22  
20  
19  
23  
21  
19  
17



19  
18  
20  
18  
21  
21  
19  
19  
17  
21  
16  
19  
23  
19  
19  
19  
17  
19  
15  
18  
20  
15  
22  
20  
19  
19  
19  
16  
17  
20  
21  
17  
17  
18  
20  
17  
19  
21  
21  
15  
19  
20  
20  
18  
17  
18  
18  
23  
15  
20  
20  
19  
15  
16  
19  
16  
21  
18  
19

17  
16  
22  
18  
19  
15  
19  
16  
17  
20  
15  
16  
18  
20  
20  
18  
19  
20  
18  
20  
19  
21  
18  
21  
19  
17  
18  
20  
17  
18  
20  
18  
21  
19  
17  
15  
21  
15  
21  
21  
16  
16  
19  
16  
18  
16  
16  
23  
20  
20  
20  
19  
15  
21  
18  
20  
19  
22  
18

15  
15  
18  
19  
19  
20  
18  
21  
22  
15  
22  
21  
18  
21  
18  
19  
18  
18  
19  
16  
19  
19  
17  
17  
21  
20  
20  
19  
21  
17  
18  
19  
18  
18  
16  
20  
19  
18  
18  
18  
19  
21  
22  
14  
19  
18  
20  
18  
18  
16  
18  
22  
21  
15  
17  
19  
19  
19  
18

18  
19  
18  
15  
20  
19  
20  
16  
21  
22  
19  
19  
19  
17  
18  
20  
19  
15  
19  
18  
19  
21  
18  
23  
16  
18  
19  
17  
21  
19  
16  
18  
20  
20  
17  
18  
22  
19  
16  
16  
19  
19  
14  
21  
20  
19  
19  
18  
19  
19  
23  
16  
18  
21  
20  
22  
20  
21  
19

18  
21  
20  
20  
20  
18  
20  
17  
16  
18  
18  
16  
18  
20  
18  
21  
19  
17  
18  
20  
15  
19  
19  
17  
16  
17  
19  
16  
18  
20  
22  
16  
18  
17  
19  
18  
16  
17  
16  
21  
18  
19  
17  
18  
22  
23  
16  
18  
19  
14  
18  
18  
15  
19  
15  
18  
19  
21  
19

19  
20  
18  
19  
17  
20  
20  
17  
17  
21  
18  
19  
19  
20  
16  
17  
17  
18  
18  
19  
21  
18  
16  
19  
19  
20  
22  
17  
21  
20  
16  
17  
20  
21  
17  
19  
18  
17  
18  
16  
19  
21  
17  
16  
21  
19  
14  
19  
18  
19  
18  
18  
18  
19  
18  
18  
20  
22  
18  
20

19  
18  
21  
19  
21  
18  
17  
23  
18  
19  
19  
15  
20  
18  
18  
16  
21  
23  
18  
14  
18  
19  
18  
17  
20  
15  
18  
19  
17  
15  
18  
17  
16  
21  
19  
15  
20  
22  
17  
18  
19  
17  
21  
21  
18  
16  
19  
21  
16  
21  
21  
19  
17  
18  
19  
22  
18  
21

20  
22  
20  
19  
20  
21  
20  
18  
19  
21  
20  
17  
21  
21  
18  
18  
21  
21  
18  
20  
22  
16  
21  
19  
21  
19  
14  
19  
18  
21  
15  
18  
19  
19  
18  
19  
21  
21  
19  
21  
21  
21  
21  
21  
18  
22  
23  
20  
19  
20  
19  
21  
23  
21  
21  
19  
17  
19  
17  
23  
20



21  
18  
18  
22  
19  
21  
19  
19  
20  
18  
21  
18  
20  
18  
19  
23  
21  
20  
19  
21  
20  
21  
22  
18  
18  
22  
18  
18  
19  
20  
19  
18  
16  
20  
16  
18  
20  
21  
17  
21  
17  
17  
21  
15  
19  
19  
14  
19  
22  
20  
20  
22  
22  
16  
22  
19  
19  
18  
20

19  
18  
17  
22  
19  
24  
21  
19  
20  
20  
19  
17  
15  
16  
20  
20  
20  
16  
19  
21  
21  
19  
23  
19  
15  
20  
19  
19  
13  
21  
21  
20  
16  
20  
22  
18  
17  
23  
18  
18  
16  
18  
15  
20  
20  
21  
23  
20  
19  
20  
17  
18  
19  
19  
17  
19  
18  
16  
22

20  
17  
17  
21  
19  
21  
17  
17  
20  
21  
24  
21  
20  
18  
20  
15  
21  
19  
21  
18  
16  
18  
17  
18  
16  
21  
17  
18  
15  
17  
20  
19  
19  
22  
21  
14  
20  
16  
15  
14  
17  
21  
25  
16  
18  
19  
20  
22  
20  
22  
17  
14  
18  
19  
18  
23  
17  
17  
16

22  
18  
21  
21  
16  
20  
16  
19  
21  
19  
18  
19  
16  
21  
20  
18  
16  
15  
18  
15  
22  
20  
15  
19  
14  
18  
24  
20  
21  
22  
18  
19  
20  
24  
14  
20  
20  
18  
20  
17  
15  
17  
17  
20  
20  
16  
18  
19  
16  
20  
21  
18  
20  
23  
22  
21  
20  
18  
18

18  
22  
18  
18  
20  
19  
22  
19  
21  
18  
18  
19  
20  
18  
18  
18  
17  
21  
18  
19  
17  
19  
18  
18  
18  
22  
17  
17  
19  
21  
21  
20  
19  
23  
19  
21  
20  
22  
19  
20  
22  
20  
16  
16  
19  
19  
20  
18  
18  
19  
21  
19  
19  
18  
14  
17  
16  
20  
17

22  
17  
19  
21  
19  
17  
14  
19  
17  
17  
18  
19  
19  
15  
19  
22  
20  
20  
20  
21  
18  
17  
15  
21  
22  
17  
20  
16  
20  
17  
19  
18  
21  
17  
21  
17  
21  
19  
17  
23  
20  
19  
16  
17  
20  
17  
18  
18  
17  
18  
20  
20  
21  
16  
16  
21  
19  
16  
21

17  
15  
18  
19  
20

21  
15  
18  
17  
16  
21  
19  
15  
20  
22  
17  
18  
19  
17  
21  
21



18  
16  
19  
21  
16  
21  
21  
19  
17  
18  
19  
22  
18  
21  
20  
22  
20  
19  
20  
21  
20  
18  
19  
21  
20  
17  
21  
21  
18  
18  
21  
21  
18  
20  
22  
16  
21  
19  
21  
19  
14  
19  
18  
21  
15  
18  
19  
19  
18  
19  
21  
21  
19  
21  
21  
21  
18  
22  
23

20  
19  
20  
19  
21  
23  
21  
21  
19  
17  
19  
17  
23  
20  
21  
18  
18  
22  
19  
21  
19  
19  
20  
18  
21  
18  
20  
18  
19  
23  
21  
20  
19  
21  
20  
21  
22  
18  
18  
22  
18  
18  
19  
20  
19  
18  
16  
20  
16  
18  
20  
21  
17  
21  
17  
17  
21  
15  
19

19  
14  
19  
22  
20  
20  
22  
22  
16  
22  
19  
19  
18  
20  
19  
18  
17  
22  
19  
24  
21  
19  
20  
20  
19  
17  
15  
16  
20  
20  
20  
16  
19  
21  
21  
19  
23  
19  
15  
20  
19  
19  
13  
21  
21  
20  
16  
20  
22  
18  
17  
23  
18  
18  
16  
18  
15  
20  
20

21  
23  
20  
19  
20  
17  
18  
19  
19  
17  
19  
18  
16  
22  
20  
17  
17  
21  
19  
21  
17  
17  
20  
21  
24  
21  
20  
18  
20  
15  
21  
19  
21  
18  
16  
18  
17  
18  
16  
21  
17  
18  
15  
17  
20  
19  
19  
22  
21  
14  
20  
16  
15  
14  
17  
21  
25  
16  
18

19  
20  
22  
20  
22  
17  
14  
18  
19  
18  
23  
17  
17  
16  
22  
18  
21  
21  
16  
20  
16  
19  
21  
19  
18  
19  
16  
21  
20  
18  
16  
15  
18  
15  
22  
20  
15  
19  
14  
18  
24  
20  
21  
22  
18  
19  
20  
24  
14  
20  
20  
18  
20  
17  
15  
17  
17  
20  
20

16  
18  
19  
16  
20  
21  
18  
20  
23  
22  
21  
20  
18  
18  
18  
22  
18  
18  
20  
19  
22  
19  
21  
18  
18  
19  
20  
18  
18  
18  
17  
21  
18  
19  
17  
19  
18  
18  
18  
22  
17  
17  
19  
21  
21  
20  
19  
23  
19  
21  
20  
22  
19  
20  
22  
20  
16  
16  
19

19  
20  
18  
18  
19  
21  
19  
19  
18  
14  
17  
16  
20  
17  
22  
17  
19  
21  
19  
17  
14  
19  
17  
17  
18  
19  
19  
15  
19  
22  
20  
20  
20  
21  
18  
17  
15  
21  
22  
17  
20  
16  
20  
17  
19  
18  
21  
17  
21  
17  
21  
19  
17  
23  
20  
19  
16  
17  
20

17  
18  
18  
17  
18  
20  
20  
21  
16  
16  
21  
19  
16  
21  
17  
15  
18  
19  
20





|                        |                        |                        |
|------------------------|------------------------|------------------------|
| 12                     | 13                     | 14                     |
| TTCAAGTAATCCAGGATAGGCT | AAACCGTTACCATTACTGAGTT | AAGCTGCCAGTTGAAGAAGTGT |
| miR-26a-5p             | miR-451a               | miR-22-3p              |
| 5953261                | 3762724                | 3462453                |
| 0.46                   | 0.07                   | 0.40                   |
| 1.01                   | 0.20                   | 0.12                   |
| 1.17                   | 0.40                   | 1.47                   |
| 0.58                   | 0.12                   | 0.60                   |
| 2.83                   | 0.07                   | 0.09                   |
| 1.46                   | 0.01                   | 0.26                   |
| 0.78                   | 0.02                   | 0.21                   |
| 0.55                   | 0.03                   | 0.14                   |
| 0.67                   | 0.22                   | 0.58                   |
| 0.80                   | 0.33                   | 0.42                   |
| 1.87                   | 0.51                   | 0.60                   |
| 0.54                   | 0.05                   | 0.24                   |
| 2.15                   | 1.71                   | 1.44                   |
| 0.47                   | 0.05                   | 0.15                   |
| 0.77                   | 0.30                   | 0.98                   |
| 1.59                   | 0.38                   | 1.69                   |
| 1.25                   | 0.05                   | 0.36                   |
| 0.86                   | 0.72                   | 1.21                   |
| 1.34                   | 0.35                   | 0.50                   |
| 2.01                   | 2.43                   | 1.37                   |
| 0.72                   | 0.06                   | 0.43                   |
| 0.97                   | 0.03                   | 0.20                   |
| 0.87                   | 0.08                   | 0.29                   |
| 0.48                   | 0.04                   | 0.24                   |
| 1.38                   | 0.06                   | 0.08                   |
| 1.99                   | 0.07                   | 0.47                   |
| 1.92                   | 0.88                   | 1.42                   |
| 1.73                   | 3.19                   | 1.67                   |
| 1.76                   | 0.14                   | 0.55                   |
| 0.62                   | 0.26                   | 0.38                   |
| 0.28                   | 0.05                   | 0.12                   |
| 1.04                   | 0.63                   | 0.30                   |
| 3.61                   | 0.51                   | 0.17                   |
| 0.72                   | 0.08                   | 0.25                   |
| 0.53                   | 0.42                   | 0.23                   |
| 1.05                   | 0.06                   | 0.23                   |
| 0.14                   | 0.01                   | 0.07                   |
| 1.45                   | 0.34                   | 0.41                   |
| 1.53                   | 5.87                   | 0.83                   |
| 1.64                   | 0.12                   | 0.34                   |
| 1.03                   | 0.12                   | 0.20                   |
| 1.24                   | 0.42                   | 0.46                   |
| 1.01                   | 0.04                   | 0.31                   |
| 1.56                   | 0.55                   | 0.86                   |
| 0.65                   | 0.06                   | 0.34                   |
| 0.84                   | 0.06                   | 0.20                   |
| 3.31                   | 0.32                   | 1.06                   |
| 1.47                   | 0.09                   | 0.53                   |
| 1.24                   | 0.50                   | 1.12                   |
| 1.57                   | 0.18                   | 0.62                   |

|      |      |      |
|------|------|------|
| 1.54 | 0.40 | 1.37 |
| 1.14 | 0.04 | 0.27 |
| 0.81 | 0.05 | 0.29 |
| 1.94 | 0.11 | 0.85 |
| 0.88 | 0.03 | 0.35 |
| 0.96 | 0.04 | 0.31 |
| 1.09 | 0.07 | 0.81 |
| 2.16 | 3.76 | 1.95 |
| 1.52 | 0.05 | 0.49 |
| 2.91 | 0.24 | 0.63 |
| 3.09 | 0.30 | 0.35 |
| 2.14 | 2.59 | 1.83 |
| 0.96 | 0.09 | 0.26 |
| 1.92 | 0.11 | 0.54 |
| 1.94 | 0.34 | 1.97 |
| 0.32 | 0.29 | 0.38 |
| 0.70 | 1.11 | 2.22 |
| 0.79 | 0.14 | 0.11 |
| 0.91 | 0.18 | 0.28 |
| 1.80 | 0.26 | 0.63 |
| 0.76 | 0.09 | 0.44 |
| 1.41 | 0.26 | 0.14 |
| 1.04 | 0.23 | 0.78 |
| 1.32 | 0.97 | 0.93 |
| 0.20 | 0.14 | 0.13 |
| 1.04 | 0.23 | 1.38 |
| 1.34 | 0.34 | 0.37 |
| 1.00 | 0.06 | 0.43 |
| 1.71 | 1.21 | 1.14 |
| 2.96 | 0.48 | 1.46 |
| 1.61 | 0.12 | 0.49 |
| 2.41 | 0.25 | 0.81 |
| 1.10 | 0.08 | 0.39 |
| 2.25 | 4.28 | 1.50 |
| 1.60 | 5.13 | 1.22 |
| 1.94 | 0.44 | 0.69 |
| 2.53 | 0.15 | 0.86 |
| 1.96 | 0.09 | 0.58 |
| 1.41 | 0.61 | 0.96 |
| 1.66 | 0.14 | 0.76 |
| 1.27 | 0.68 | 0.61 |
| 0.66 | 0.03 | 0.23 |
| 0.90 | 0.04 | 0.37 |
| 1.87 | 0.17 | 0.79 |
| 1.82 | 0.26 | 0.83 |
| 0.00 | 0.00 | 0.00 |
| 0.00 | 0.00 | 0.00 |
| 0.00 | 0.00 | 0.00 |





13

14

15

---

*C\_46*

*C\_47*

*D\_16*

---

|       |       |       |
|-------|-------|-------|
| -0.50 |       |       |
| 0.13  | -0.22 |       |
| 0.54  | -0.57 | 0.16  |
| -0.36 | 0.36  | 0.10  |
| 0.09  | -0.04 | 0.45  |
| 0.24  | -0.21 | 0.24  |
| 0.52  | -0.37 | 0.18  |
| -0.10 | -0.01 | -0.19 |
| -0.41 | 0.41  | -0.27 |
| -0.40 | 0.42  | -0.22 |
| -0.49 | 0.65  | -0.28 |
| -0.33 | 0.17  | -0.31 |
| -0.15 | -0.05 | -0.22 |
| 0.35  | -0.50 | 0.36  |
| 0.42  | -0.29 | 0.12  |
| 0.20  | -0.43 | 0.03  |
| 0.01  | -0.21 | 0.23  |
| -0.41 | 0.31  | -0.02 |
| 0.08  | -0.28 | 0.03  |
| 0.15  | -0.31 | -0.02 |
| -0.03 | 0.28  | 0.01  |
| 0.07  | 0.24  | 0.11  |
| -0.10 | 0.09  | -0.25 |
| -0.32 | 0.56  | -0.23 |
| 0.38  | -0.24 | 0.10  |
| 0.63  | -0.32 | 0.23  |
| 0.05  | 0.13  | -0.15 |
| -0.21 | 0.27  | -0.05 |
| -0.13 | 0.16  | -0.07 |
| -0.38 | 0.31  | -0.22 |
| 0.58  | -0.37 | 0.39  |
| -0.25 | 0.38  | -0.18 |
| -0.32 | 0.35  | -0.13 |
| 0.30  | -0.50 | 0.05  |
| -0.12 | 0.10  | -0.21 |
| 0.20  | -0.14 | 0.15  |
| -0.03 | -0.03 | 0.03  |
| 0.18  | -0.23 | 0.07  |
| -0.34 | 0.08  | -0.16 |
| -0.36 | 0.19  | -0.08 |
| 0.20  | -0.37 | 0.03  |
| -0.23 | 0.16  | -0.38 |

|       |       |       |
|-------|-------|-------|
| -0.46 | 0.18  | -0.06 |
| -0.19 | -0.10 | -0.07 |
| 0.47  | -0.31 | 0.15  |
| -0.34 | 0.17  | -0.30 |
| 0.23  | -0.40 | -0.21 |
| 0.16  | -0.36 | -0.20 |
| 0.44  | -0.39 | 0.25  |
| -0.31 | 0.26  | -0.04 |
| -0.17 | -0.11 | -0.14 |
| 0.21  | -0.29 | 0.35  |
| 0.06  | 0.18  | 0.19  |
| 0.38  | -0.43 | 0.37  |
| -0.14 | -0.17 | 0.02  |
| -0.22 | 0.22  | -0.03 |
| 0.14  | -0.16 | 0.07  |
| -0.11 | 0.21  | 0.05  |
| 0.44  | -0.32 | -0.03 |
| 0.31  | -0.27 | 0.24  |
| 0.56  | -0.19 | 0.17  |
| -0.21 | 0.24  | -0.06 |
| 0.41  | -0.21 | 0.16  |
| 0.19  | -0.27 | 0.25  |
| -0.11 | -0.03 | -0.13 |
| 0.41  | -0.54 | 0.46  |
| 0.35  | -0.55 | 0.19  |
| -0.24 | 0.13  | 0.07  |
| 0.14  | -0.48 | -0.06 |
| -0.13 | 0.33  | -0.32 |
| 0.55  | -0.37 | 0.09  |
| 0.40  | -0.30 | 0.14  |
| 0.08  | -0.09 | 0.02  |
| 0.26  | -0.37 | 0.02  |
| 0.03  | -0.25 | 0.00  |
| 0.56  | -0.51 | 0.38  |
| 0.05  | -0.18 | -0.01 |
| 0.35  | -0.22 | 0.18  |
| -0.06 | 0.08  | -0.06 |
| -0.32 | 0.31  | -0.25 |
| 0.20  | -0.32 | 0.20  |
| 0.10  | -0.34 | 0.11  |



|                        |                        |                       |
|------------------------|------------------------|-----------------------|
| 11                     | 12                     | 13                    |
| 113                    | 114                    | 115                   |
| GTCCAGTTTTCCAGGAATCCCT | CAAAGTGCTCATAGTCAGGTAG | AGGCAAGATGCTGGCATAGCT |
| miR-145-5p             | miR-20b-5p             | miR-31-5p             |
| 20235                  | 19721                  | 18520                 |
| 1.29                   | -0.65                  | -0.50                 |
| -1.36                  | -1.33                  | -1.48                 |
| -0.50                  | 2.10                   | -0.21                 |
| -0.60                  | 0.65                   | -0.93                 |
| -0.24                  | 0.43                   | 1.96                  |
| -1.07                  | -0.97                  | -0.74                 |
| -0.22                  | -0.90                  | 0.74                  |
| 0.54                   | -1.06                  | -0.46                 |
| -0.77                  | 0.14                   | -1.00                 |
| -0.92                  | 0.25                   | -0.84                 |
| -0.71                  | 0.86                   | 0.28                  |
| -0.88                  | -1.20                  | 0.64                  |
| 1.49                   | 0.32                   | -0.20                 |
| 0.50                   | -0.91                  | -0.23                 |
| -0.06                  | 1.15                   | -0.73                 |
| -0.32                  | 0.59                   | -0.07                 |
| 0.83                   | -0.20                  | 0.82                  |
| 0.22                   | 0.93                   | 0.41                  |
| 2.10                   | -0.28                  | -0.83                 |
| -0.52                  | 1.59                   | 0.21                  |

|       |       |       |
|-------|-------|-------|
| -0.99 | -0.46 | -0.98 |
| -0.01 | -0.92 | 2.31  |
| -0.08 | -0.55 | 0.71  |
| -0.75 | -0.74 | 0.41  |
| 0.51  | -0.78 | -0.47 |
| 2.78  | -0.29 | 2.20  |
| -0.27 | 2.22  | -1.01 |
| -0.80 | 4.25  | -0.43 |
| -0.30 | 0.11  | -0.45 |
| -0.32 | 0.59  | -1.21 |
| -0.88 | 0.91  | -1.37 |
| -0.97 | 3.39  | -1.15 |
| 0.19  | 3.13  | -0.43 |
| 2.55  | -0.72 | -1.09 |
| 8.36  | -0.44 | -1.18 |
| 0.31  | -1.07 | 4.13  |
| -1.19 | -1.22 | -1.28 |
| 1.23  | -0.54 | 1.78  |
| 2.63  | 0.85  | 1.65  |
| 0.24  | -0.79 | 1.57  |
| 9.01  | -0.80 | -0.25 |
| 18.44 | -0.89 | 5.93  |
| 1.13  | -0.59 | -0.44 |
| 1.89  | 0.18  | -1.00 |
| 1.54  | -1.07 | -0.17 |
| 1.13  | -1.00 | -0.51 |
| 0.21  | -0.02 | 0.00  |
| -0.04 | -0.90 | 1.19  |
| 0.07  | -0.29 | -0.20 |
| -0.42 | -0.49 | 2.30  |
| -0.45 | 0.15  | 1.10  |
| 0.23  | -0.85 | 0.22  |
| 0.17  | -0.30 | -1.19 |
| 1.06  | -0.25 | 0.43  |
| -1.05 | -0.98 | -0.40 |
| -0.07 | -0.39 | -0.30 |
| -0.72 | -0.41 | -0.03 |
| -0.81 | 3.54  | 0.81  |
| 1.63  | -0.55 | 2.36  |
| 1.23  | 0.24  | 1.36  |
| 1.52  | 0.28  | 1.12  |
| -0.70 | 6.13  | -0.05 |
| 0.89  | -0.58 | -0.47 |
| -0.49 | -0.32 | 0.04  |
| -0.63 | 1.52  | -0.94 |
| -0.36 | -0.21 | -0.96 |
| -0.18 | 0.94  | -1.25 |
| -0.55 | 2.11  | -0.11 |
| 1.38  | 2.51  | -0.71 |
| 1.99  | 3.05  | 0.41  |
| -0.03 | -0.43 | -0.72 |
| -0.52 | -0.56 | -0.89 |
| -0.88 | -0.37 | -0.61 |
| 0.83  | -0.07 | 0.43  |
| 23.97 | -1.33 | -0.09 |
| -0.61 | 0.04  | 1.16  |
| 0.80  | 0.59  | 0.44  |
| -1.03 | -1.02 | -1.29 |
| -0.37 | 3.65  | 0.16  |

|       |       |       |
|-------|-------|-------|
| -0.53 | -0.04 | -0.43 |
| -0.85 | 0.02  | -0.04 |
| -0.57 | -0.16 | -0.18 |
| 0.21  | -0.78 | 0.69  |
| 0.03  | 0.64  | 1.83  |
| -1.15 | 3.00  | 0.24  |
| 1.63  | -0.56 | -0.08 |
| -0.04 | -0.42 | 0.88  |
| -0.46 | -0.41 | 0.78  |
| -0.10 | 0.45  | 0.01  |
| 0.54  | -0.29 | 0.82  |
| -1.14 | 0.77  | -0.94 |
| -0.44 | -0.83 | -0.86 |
| -0.13 | -0.77 | 0.55  |
| -0.40 | 1.39  | -1.13 |
| 1.03  | -0.16 | -0.98 |

|      |      |      |
|------|------|------|
| -1   | 1    | 0    |
| 0.00 | 0.00 | 0.00 |
| 1.00 | 1.00 | 1.00 |
| 0.64 | 0.75 | 0.21 |

|                        |                         |                       |
|------------------------|-------------------------|-----------------------|
| 113                    | 114                     | 115                   |
| GTCCAGTTTTCCAGGAATCCCT | CAAAGTGCTCATAGTGCAGGTAG | AGGCAAGATGCTGGCATAGCT |
| miR-145-5p             | miR-20b-5p              | miR-31-5p             |
| 20235                  | 19721                   | 18520                 |
| 1.29                   | -0.65                   | -0.50                 |
| -1.36                  | -1.33                   | -1.48                 |
| -0.50                  | 2.10                    | -0.21                 |
| -0.60                  | 0.65                    | -0.93                 |
| -0.24                  | 0.43                    | 1.96                  |
| -1.07                  | -0.97                   | -0.74                 |
| -0.22                  | -0.90                   | 0.74                  |
| 0.54                   | -1.06                   | -0.46                 |
| -0.77                  | 0.14                    | -1.00                 |
| -0.92                  | 0.25                    | -0.84                 |
| -0.71                  | 0.86                    | 0.28                  |
| -0.88                  | -1.20                   | 0.64                  |
| 1.49                   | 0.32                    | -0.20                 |
| 0.50                   | -0.91                   | -0.23                 |
| -0.06                  | 1.15                    | -0.73                 |
| -0.32                  | 0.59                    | -0.07                 |
| 0.83                   | -0.20                   | 0.82                  |
| 0.22                   | 0.93                    | 0.41                  |
| 2.10                   | -0.28                   | -0.83                 |
| -0.52                  | 1.59                    | 0.21                  |
| -0.99                  | -0.46                   | -0.98                 |
| -0.01                  | -0.92                   | 2.31                  |
| -0.08                  | -0.55                   | 0.71                  |
| -0.75                  | -0.74                   | 0.41                  |
| 0.51                   | -0.78                   | -0.47                 |
| 2.78                   | -0.29                   | 2.20                  |
| -0.27                  | 2.22                    | -1.01                 |
| -0.80                  | 4.25                    | -0.43                 |

|       |       |       |
|-------|-------|-------|
| -0.30 | 0.11  | -0.45 |
| -0.32 | 0.59  | -1.21 |
| -0.88 | 0.91  | -1.37 |
| -0.97 | 3.39  | -1.15 |
| 0.19  | 3.13  | -0.43 |
| 2.55  | -0.72 | -1.09 |
| 8.36  | -0.44 | -1.18 |
| 0.31  | -1.07 | 4.13  |
| -1.19 | -1.22 | -1.28 |
| 1.23  | -0.54 | 1.78  |
| 2.63  | 0.85  | 1.65  |
| 0.24  | -0.79 | 1.57  |
| 9.01  | -0.80 | -0.25 |
| 18.44 | -0.89 | 5.93  |
| 1.13  | -0.59 | -0.44 |
| 1.89  | 0.18  | -1.00 |
| 1.54  | -1.07 | -0.17 |
| 1.13  | -1.00 | -0.51 |
| 0.21  | -0.02 | 0.00  |
| -0.04 | -0.90 | 1.19  |
| 0.07  | -0.29 | -0.20 |
| -0.42 | -0.49 | 2.30  |
| -0.45 | 0.15  | 1.10  |
| 0.23  | -0.85 | 0.22  |
| 0.17  | -0.30 | -1.19 |
| 1.06  | -0.25 | 0.43  |
| -1.05 | -0.98 | -0.40 |
| -0.07 | -0.39 | -0.30 |
| -0.72 | -0.41 | -0.03 |
| -0.81 | 3.54  | 0.81  |
| 1.63  | -0.55 | 2.36  |
| 1.23  | 0.24  | 1.36  |
| 1.52  | 0.28  | 1.12  |
| -0.70 | 6.13  | -0.05 |
| 0.89  | -0.58 | -0.47 |
| -0.49 | -0.32 | 0.04  |
| -0.63 | 1.52  | -0.94 |
| -0.36 | -0.21 | -0.96 |
| -0.18 | 0.94  | -1.25 |
| -0.55 | 2.11  | -0.11 |
| 1.38  | 2.51  | -0.71 |
| 1.99  | 3.05  | 0.41  |
| -0.03 | -0.43 | -0.72 |
| -0.52 | -0.56 | -0.89 |
| -0.88 | -0.37 | -0.61 |
| 0.83  | -0.07 | 0.43  |
| 23.97 | -1.33 | -0.09 |
| -0.61 | 0.04  | 1.16  |
| 0.80  | 0.59  | 0.44  |
| -1.03 | -1.02 | -1.29 |
| -0.37 | 3.65  | 0.16  |
| -0.53 | -0.04 | -0.43 |
| -0.85 | 0.02  | -0.04 |
| -0.57 | -0.16 | -0.18 |
| 0.21  | -0.78 | 0.69  |
| 0.03  | 0.64  | 1.83  |
| -1.15 | 3.00  | 0.24  |
| 1.63  | -0.56 | -0.08 |
| -0.04 | -0.42 | 0.88  |

|       |       |       |
|-------|-------|-------|
| -0.46 | -0.41 | 0.78  |
| -0.10 | 0.45  | 0.01  |
| 0.54  | -0.29 | 0.82  |
| -1.14 | 0.77  | -0.94 |
| -0.44 | -0.83 | -0.86 |
| -0.13 | -0.77 | 0.55  |
| -0.40 | 1.39  | -1.13 |
| 1     | 0     | -1    |

---

|                        |                         |                        |
|------------------------|-------------------------|------------------------|
| 113                    | 114                     | 115                    |
| 14                     | 18                      | 54                     |
| TGAGGTAGTAGGTTGTGTGGTT | AGCAGCATTGTACAGGGCTATGA | CTTTCAGTCGGATGTTTACAGC |
| let-7b-5p              | miR-103a-3p             | miR-30e-3p             |
| 1666971                | 1030775                 | 138740                 |
| 2.23                   | -0.02                   | -0.84                  |
| -1.07                  | 0.44                    | -0.78                  |
| 1.24                   | 0.76                    | 0.98                   |
| 1.04                   | -0.33                   | -0.11                  |
| 0.48                   | 1.38                    | -0.71                  |
| -0.45                  | -1.13                   | -0.26                  |
| -0.41                  | -0.23                   | -0.23                  |
| 0.48                   | -1.13                   | -0.11                  |
| -0.41                  | -1.03                   | -0.63                  |
| -0.23                  | -0.64                   | -0.81                  |
| -1.34                  | -0.83                   | 1.28                   |
| -0.25                  | -0.68                   | 0.01                   |
| -0.88                  | 1.13                    | 1.70                   |
| 1.60                   | -0.92                   | -0.45                  |
| -0.34                  | 1.53                    | 0.33                   |
| -1.43                  | 1.05                    | 0.87                   |
| 0.63                   | -0.43                   | -0.73                  |
| 0.27                   | 2.86                    | -0.44                  |
| -1.58                  | 0.86                    | 3.16                   |
| -0.97                  | 0.72                    | 1.62                   |
| -0.67                  | -0.17                   | -0.02                  |
| -0.06                  | -0.09                   | -0.26                  |
| 0.73                   | 0.11                    | -0.44                  |
| 1.83                   | -0.49                   | -1.03                  |
| 0.38                   | -1.15                   | -1.02                  |
| -0.14                  | -0.73                   | -0.81                  |
| -0.67                  | -0.82                   | -0.28                  |
| -0.97                  | 0.06                    | 1.10                   |
| -1.69                  | -0.14                   | 5.47                   |
| -1.30                  | 0.20                    | 2.51                   |
| 1.11                   | -0.06                   | -0.58                  |
| -1.17                  | 1.21                    | 3.78                   |
| -0.06                  | 1.17                    | -0.43                  |
| 0.14                   | -0.75                   | 0.68                   |
| 1.18                   | 0.28                    | -0.35                  |
| -1.14                  | -0.77                   | 0.15                   |
| 2.07                   | -1.84                   | -1.32                  |
| -1.12                  | 0.40                    | 1.26                   |
| -1.06                  | 0.90                    | 0.81                   |

|       |       |       |
|-------|-------|-------|
| -1.01 | -0.21 | 0.56  |
| 1.50  | 0.41  | -1.32 |
| 3.71  | 2.61  | -1.18 |
| -0.60 | -0.28 | -0.63 |
| -1.59 | 1.57  | 1.23  |
| -1.23 | -0.39 | 0.95  |
| 1.47  | -1.04 | -1.41 |
| -1.66 | 0.06  | 1.22  |
| -0.98 | 0.33  | 0.38  |
| -0.77 | 0.95  | -0.62 |
| -0.95 | 0.15  | -0.45 |
| -1.23 | 1.00  | -0.57 |
| -0.59 | -0.13 | -0.40 |
| 0.56  | -0.25 | -0.87 |
| -0.76 | 1.50  | -0.12 |
| -0.60 | -0.67 | 0.10  |
| 0.13  | -0.59 | -0.37 |
| -0.62 | -0.15 | -0.61 |
| -1.21 | -0.66 | -0.72 |
| 0.12  | -0.80 | -0.64 |
| -0.12 | 0.71  | -0.56 |
| -0.54 | 0.50  | -1.07 |
| -1.03 | -0.58 | -0.60 |
| 1.15  | -1.46 | -1.10 |
| 0.18  | -1.29 | -1.16 |
| 0.18  | -1.08 | -0.93 |
| 0.24  | 1.76  | 5.98  |
| -0.27 | -0.36 | -0.63 |
| -1.02 | 2.03  | 1.81  |
| 6.59  | 3.48  | -0.39 |
| 1.48  | 3.75  | 2.28  |
| -0.02 | 0.11  | 0.65  |
| -2.12 | -0.96 | 5.13  |
| 0.21  | -0.55 | -0.17 |
| 0.87  | 1.06  | 0.11  |
| 8.15  | 0.14  | -1.28 |
| -0.75 | 0.57  | 0.05  |
| -1.54 | 0.84  | 2.62  |
| -0.96 | -0.12 | 3.69  |
| -0.74 | 2.68  | -0.11 |
| -1.32 | 0.10  | 0.80  |
| 0.20  | -0.84 | -0.82 |
| -0.79 | -0.11 | 0.08  |
| -1.22 | -0.49 | -1.03 |
| -1.32 | 1.38  | 0.12  |
| -1.20 | 0.40  | -0.27 |
| -1.22 | 0.02  | -0.05 |
| -1.02 | 0.41  | 0.26  |
| -0.66 | -0.34 | -0.43 |
| -1.48 | 1.72  | 2.31  |
| -1.02 | 0.17  | 0.20  |
| -0.62 | 1.07  | 1.71  |
| -1.42 | -0.30 | 0.67  |
| 0.27  | -0.31 | -0.19 |
| -1.02 | -0.82 | -0.01 |
| -0.16 | -0.71 | -1.20 |
| 1.03  | 1.03  | 1.04  |
| 0.78  | 1.00  | 1.00  |













































































































































































| NP    | P     | UC    |
|-------|-------|-------|
| 43.20 | 33.67 | 18.85 |
| 1.44  | 3.92  | 2.06  |

gamma, beta fits of random label, random selection

| NP                       | P     | UC     |
|--------------------------|-------|--------|
| K-S                      | K-S   | K-S    |
| A-D                      | A-D   | A-D    |
| alpha                    | alpha | alpha  |
| 74.81                    | 85.72 | 878.84 |
| beta                     | beta  | beta   |
| 0.90                     | 0.44  | 0.10   |
| p-val of ave of observed |       |        |
| 0.00                     | 0.17  | 0.00   |
| observed aves            |       |        |
| 43.20                    | 33.67 | 18.85  |





























































|                        |                        |                        |
|------------------------|------------------------|------------------------|
| 15                     | 16                     | 17                     |
| CATTGCACTTGTCTCGGTCTGA | TGAGGTAGTAGTTTGTGCTGTT | TGTAAACATCCCCGACTGGAAG |
| miR-25-3p              | let-7i-5p              | miR-30d-5p             |
| 3413660                | 2186845                | 2131733                |
| 1.21                   | 0.86                   | 0.64                   |
| 0.87                   | 0.24                   | 0.36                   |
| 1.77                   | 0.71                   | 0.57                   |
| 1.29                   | 0.82                   | 0.43                   |
| 0.40                   | 0.27                   | 0.45                   |
| 0.67                   | 1.09                   | 0.32                   |
| 0.37                   | 0.79                   | 0.53                   |
| 0.34                   | 0.22                   | 0.58                   |
| 1.13                   | 0.32                   | 0.39                   |
| 1.27                   | 0.49                   | 0.33                   |
| 0.78                   | 0.21                   | 0.45                   |
| 0.32                   | 0.52                   | 0.42                   |
| 0.80                   | 0.98                   | 0.49                   |
| 0.44                   | 0.18                   | 0.46                   |
| 1.05                   | 0.43                   | 0.45                   |
| 0.69                   | 0.49                   | 0.59                   |
| 0.49                   | 0.34                   | 0.58                   |
| 1.06                   | 0.41                   | 0.68                   |
| 0.99                   | 0.30                   | 0.37                   |
| 0.63                   | 0.27                   | 0.65                   |
| 0.85                   | 0.84                   | 0.32                   |
| 0.35                   | 0.30                   | 0.61                   |
| 0.35                   | 0.39                   | 0.67                   |
| 0.26                   | 0.34                   | 0.56                   |
| 0.35                   | 0.09                   | 0.38                   |
| 0.60                   | 0.38                   | 0.54                   |
| 1.18                   | 0.45                   | 0.47                   |
| 1.20                   | 0.54                   | 0.37                   |
| 1.18                   | 0.50                   | 0.28                   |
| 1.43                   | 0.50                   | 0.22                   |
| 1.16                   | 0.67                   | 0.37                   |
| 2.07                   | 0.73                   | 0.26                   |
| 0.82                   | 0.24                   | 0.41                   |
| 0.70                   | 0.32                   | 0.45                   |
| 1.13                   | 0.39                   | 0.44                   |
| 0.67                   | 0.35                   | 0.40                   |
| 0.21                   | 0.22                   | 0.27                   |
| 1.60                   | 1.28                   | 0.41                   |
| 1.94                   | 1.26                   | 0.47                   |
| 0.37                   | 0.20                   | 0.55                   |
| 0.29                   | 1.11                   | 0.40                   |
| 0.21                   | 3.48                   | 0.41                   |
| 0.44                   | 0.41                   | 0.54                   |
| 1.52                   | 0.97                   | 0.33                   |
| 0.41                   | 0.13                   | 0.42                   |
| 0.13                   | 0.60                   | 0.40                   |
| 0.58                   | 0.26                   | 0.58                   |
| 0.43                   | 0.31                   | 0.70                   |
| 0.47                   | 0.28                   | 0.89                   |
| 0.42                   | 0.24                   | 0.70                   |

|      |      |      |
|------|------|------|
| 0.52 | 0.34 | 0.82 |
| 0.42 | 0.47 | 0.57 |
| 0.55 | 0.53 | 0.40 |
| 0.48 | 0.60 | 0.58 |
| 0.49 | 0.46 | 0.41 |
| 0.48 | 0.27 | 0.45 |
| 0.66 | 0.72 | 0.51 |
| 0.80 | 0.54 | 0.37 |
| 0.66 | 0.32 | 0.57 |
| 0.60 | 0.53 | 0.77 |
| 0.42 | 0.27 | 0.63 |
| 1.07 | 0.49 | 0.36 |
| 0.49 | 0.23 | 0.52 |
| 0.52 | 0.65 | 0.46 |
| 1.00 | 0.62 | 0.43 |
| 1.85 | 2.07 | 0.55 |
| 3.58 | 1.08 | 0.40 |
| 2.20 | 0.82 | 0.25 |
| 1.53 | 1.10 | 1.09 |
| 1.40 | 0.83 | 1.11 |
| 1.14 | 0.80 | 0.48 |
| 0.79 | 1.15 | 0.38 |
| 1.37 | 0.89 | 0.41 |
| 0.72 | 0.49 | 0.60 |
| 0.15 | 0.86 | 0.37 |
| 0.60 | 0.80 | 0.45 |
| 1.12 | 0.34 | 0.32 |
| 1.13 | 0.40 | 0.28 |
| 1.04 | 0.59 | 0.56 |
| 0.68 | 0.28 | 0.57 |
| 0.52 | 0.16 | 0.57 |
| 0.76 | 0.46 | 0.41 |
| 0.13 | 0.21 | 0.63 |
| 0.62 | 0.45 | 0.62 |
| 0.82 | 0.44 | 0.41 |
| 0.48 | 0.18 | 0.57 |
| 0.47 | 0.35 | 0.61 |
| 0.64 | 0.51 | 0.46 |
| 0.95 | 0.43 | 0.44 |
| 0.57 | 0.28 | 0.46 |
| 1.21 | 0.81 | 0.48 |
| 0.82 | 0.63 | 0.28 |
| 0.49 | 0.40 | 0.69 |
| 0.99 | 0.45 | 0.32 |
| 2.06 | 1.26 | 0.45 |
| 0.00 | 0.00 | 0.00 |
| 0.00 | 0.00 | 0.00 |
| 0.00 | 0.00 | 0.00 |







16

17

18

---

*D\_17*

*D\_18*

*D\_36*

---

|       |       |       |
|-------|-------|-------|
| -0.24 |       |       |
| 0.19  | 0.08  |       |
| 0.18  | 0.07  | 0.03  |
| 0.30  | -0.28 | 0.05  |
| 0.00  | -0.19 | -0.17 |
| -0.28 | 0.46  | -0.01 |
| -0.19 | 0.54  | 0.00  |
| -0.41 | 0.44  | -0.04 |
| -0.31 | -0.07 | -0.32 |
| 0.00  | 0.36  | -0.12 |
| 0.43  | -0.27 | 0.11  |
| 0.28  | -0.38 | 0.00  |
| 0.23  | -0.25 | -0.23 |
| -0.06 | -0.32 | -0.09 |
| -0.37 | -0.13 | -0.11 |
| 0.06  | -0.33 | -0.16 |
| 0.17  | -0.37 | -0.07 |
| -0.20 | 0.20  | 0.02  |
| -0.15 | 0.16  | 0.19  |
| -0.16 | 0.29  | -0.17 |
| -0.41 | -0.14 | -0.13 |
| 0.17  | -0.05 | 0.10  |
| 0.31  | -0.16 | 0.19  |
| 0.01  | 0.39  | -0.05 |
| -0.25 | 0.48  | 0.14  |
| -0.10 | 0.43  | 0.16  |
| 0.01  | 0.50  | -0.04 |
| 0.38  | -0.08 | 0.11  |
| -0.18 | 0.18  | 0.00  |
| -0.30 | 0.44  | 0.12  |
| 0.51  | 0.07  | -0.01 |
| 0.09  | 0.37  | 0.04  |
| 0.40  | 0.03  | 0.36  |
| 0.16  | 0.39  | 0.19  |
| 0.56  | 0.11  | 0.42  |
| 0.00  | 0.28  | -0.05 |
| -0.13 | 0.16  | -0.03 |
| 0.46  | 0.12  | 0.04  |
| -0.07 | -0.02 | -0.25 |

|       |       |       |
|-------|-------|-------|
| -0.21 | 0.43  | -0.06 |
| 0.15  | -0.10 | 0.09  |
| 0.27  | -0.34 | 0.02  |
| -0.26 | 0.31  | -0.14 |
| 0.36  | -0.16 | -0.10 |
| 0.26  | -0.21 | -0.10 |
| 0.28  | -0.41 | 0.05  |
| -0.34 | 0.31  | -0.12 |
| -0.03 | 0.13  | -0.24 |
| 0.21  | -0.04 | 0.02  |
| -0.13 | -0.05 | 0.14  |
| 0.31  | -0.30 | 0.30  |
| -0.18 | -0.24 | -0.13 |
| -0.29 | -0.09 | 0.04  |
| 0.16  | -0.10 | 0.16  |
| -0.24 | -0.09 | 0.06  |
| 0.29  | -0.36 | 0.09  |
| 0.13  | -0.37 | 0.14  |
| 0.26  | -0.24 | 0.29  |
| -0.19 | 0.42  | 0.17  |
| 0.45  | -0.24 | 0.23  |
| 0.11  | -0.14 | -0.07 |
| -0.01 | -0.21 | -0.09 |
| 0.47  | -0.01 | 0.25  |
| 0.64  | -0.01 | 0.02  |
| -0.04 | 0.40  | -0.09 |
| 0.35  | 0.01  | -0.08 |
| 0.02  | 0.27  | 0.05  |
| 0.27  | -0.26 | 0.07  |
| 0.15  | -0.35 | 0.01  |
| 0.32  | 0.28  | 0.10  |
| 0.41  | 0.22  | 0.08  |
| 0.16  | 0.00  | -0.03 |
| 0.41  | -0.18 | 0.15  |
| 0.28  | 0.17  | 0.01  |
| 0.09  | -0.28 | -0.05 |
| -0.13 | 0.08  | -0.11 |
| -0.20 | 0.60  | 0.00  |
| 0.29  | -0.06 | -0.22 |
| 0.24  | 0.08  | -0.04 |

|                        |                         |                        |
|------------------------|-------------------------|------------------------|
| 14                     | 15                      | 16                     |
| 116                    | 117                     | 118                    |
| TGAGGTAGTAGGTTGTATGGTT | TGTA AACATCCTCGACTGGAAG | ACAGTAGTCTGCACATTGGTTA |
| let-7c                 | miR-30a-5p              | miR-199a-3p            |
| 18147                  | 16585                   | 16186                  |
| 0.13                   | 0.81                    | -0.55                  |
| 1.32                   | -2.04                   | -0.68                  |
| 0.55                   | -0.73                   | -0.47                  |
| -0.11                  | -1.10                   | -0.58                  |
| -0.41                  | -1.73                   | 1.93                   |
| -0.54                  | -0.61                   | -0.07                  |
| 0.83                   | 0.33                    | 0.30                   |
| -1.01                  | -0.27                   | -0.86                  |
| -0.58                  | -0.07                   | -0.96                  |
| -1.00                  | -1.41                   | -0.85                  |
| -1.11                  | 0.21                    | 0.00                   |
| 1.17                   | -0.32                   | -0.78                  |
| -0.27                  | 1.06                    | 2.25                   |
| -0.49                  | 1.66                    | -1.02                  |
| -0.64                  | 0.53                    | -0.64                  |
| -0.41                  | 0.27                    | 2.80                   |
| 0.37                   | 1.58                    | -0.92                  |
| -0.71                  | 0.35                    | 0.00                   |
| -1.29                  | 0.95                    | -0.66                  |
| -1.18                  | 1.77                    | 0.90                   |

|       |       |       |
|-------|-------|-------|
| -0.27 | -0.79 | -0.15 |
| 2.87  | 0.19  | -0.20 |
| 0.97  | 0.65  | 0.98  |
| 0.48  | -0.93 | -0.17 |
| 1.76  | -0.83 | 0.47  |
| 0.32  | 0.02  | -0.33 |
| -0.76 | 0.47  | 0.26  |
| -0.32 | 5.68  | 1.89  |
| -0.66 | -0.22 | 1.02  |
| -1.47 | -0.89 | -0.86 |
| -0.70 | -0.17 | -0.98 |
| -0.95 | 2.08  | 0.75  |
| -0.26 | -1.44 | 4.41  |
| -0.59 | -0.52 | -0.46 |
| -0.64 | -0.26 | -0.52 |
| 4.97  | -0.37 | -0.77 |
| -0.38 | -1.11 | -1.22 |
| -0.49 | 0.33  | -0.34 |
| -0.98 | 3.52  | 0.64  |
| -0.36 | 1.24  | -0.61 |
| -0.91 | -1.11 | 0.13  |
| 0.59  | 0.29  | 1.26  |
| -0.01 | 0.15  | -0.09 |
| -1.50 | 2.85  | 2.03  |
| -0.69 | -1.20 | -0.76 |
| -1.73 | -1.25 | -0.54 |
| -1.07 | 0.94  | 0.93  |
| 0.38  | 0.20  | 0.16  |
| -1.24 | -0.05 | 0.44  |
| -1.23 | -0.17 | -0.38 |
| -1.00 | 0.93  | 1.69  |
| 1.16  | -1.08 | 0.17  |
| 0.25  | -0.87 | -0.17 |
| 0.59  | -0.47 | 2.07  |
| 0.36  | -0.85 | 0.18  |
| 0.09  | -1.08 | -0.43 |
| 0.43  | -0.66 | 0.58  |
| -1.15 | 4.39  | 1.95  |
| 1.64  | -0.74 | -0.39 |
| 1.58  | -0.13 | 2.51  |
| 0.48  | -0.97 | 2.77  |
| -1.27 | -0.13 | 0.92  |
| -1.04 | -1.21 | -0.93 |
| 0.07  | -0.82 | 0.18  |
| -0.19 | 4.46  | -0.36 |
| 0.78  | 4.44  | -0.55 |
| -1.28 | -0.61 | 0.55  |
| 1.60  | 0.30  | -0.84 |
| 2.96  | 0.11  | 0.80  |
| 1.34  | 1.46  | 1.87  |
| 0.14  | -0.71 | -0.45 |
| -1.78 | -0.12 | 2.16  |
| -0.83 | -1.13 | -0.33 |
| -0.55 | -0.20 | 0.00  |
| 0.72  | -1.56 | -1.12 |
| 0.14  | 1.81  | 0.77  |
| -1.07 | 0.29  | -0.63 |
| 0.64  | -1.39 | 0.04  |
| -0.32 | 0.79  | 0.64  |

|       |       |       |
|-------|-------|-------|
| -0.94 | 1.89  | 0.69  |
| -0.94 | 2.55  | -1.01 |
| -0.83 | -0.70 | 0.35  |
| -1.38 | 0.51  | -0.33 |
| -0.40 | 0.62  | 1.64  |
| -1.35 | -0.14 | 0.28  |
| -1.14 | 1.18  | -0.06 |
| -0.52 | 0.13  | 0.29  |
| -0.22 | -0.27 | -0.51 |
| -0.82 | -0.47 | 0.13  |
| -0.66 | 1.35  | -0.16 |
| 0.39  | 5.62  | 0.02  |
| -1.22 | -0.82 | -0.59 |
| 1.12  | -0.77 | -0.18 |
| -0.68 | 4.11  | 0.27  |
| -0.05 | -0.74 | 0.85  |

|      |      |      |
|------|------|------|
| -1   | 0    | 0    |
| 0.00 | 0.00 | 0.00 |
| 1.00 | 1.00 | 1.00 |
| 0.92 | 0.38 | 0.21 |

|                        |                       |                        |
|------------------------|-----------------------|------------------------|
| 116                    | 117                   | 118                    |
| TGAGGTAGTAGGTTGTATGGTT | TGTAACATCCTCGACTGGAAG | ACAGTAGTCTGCACATTGGTTA |
| let-7c                 | miR-30a-5p            | miR-199a-3p            |
| 18147                  | 16585                 | 16186                  |
| 0.13                   | 0.81                  | -0.55                  |
| 1.32                   | -2.04                 | -0.68                  |
| 0.55                   | -0.73                 | -0.47                  |
| -0.11                  | -1.10                 | -0.58                  |
| -0.41                  | -1.73                 | 1.93                   |
| -0.54                  | -0.61                 | -0.07                  |
| 0.83                   | 0.33                  | 0.30                   |
| -1.01                  | -0.27                 | -0.86                  |
| -0.58                  | -0.07                 | -0.96                  |
| -1.00                  | -1.41                 | -0.85                  |
| -1.11                  | 0.21                  | 0.00                   |
| 1.17                   | -0.32                 | -0.78                  |
| -0.27                  | 1.06                  | 2.25                   |
| -0.49                  | 1.66                  | -1.02                  |
| -0.64                  | 0.53                  | -0.64                  |
| -0.41                  | 0.27                  | 2.80                   |
| 0.37                   | 1.58                  | -0.92                  |
| -0.71                  | 0.35                  | 0.00                   |
| -1.29                  | 0.95                  | -0.66                  |
| -1.18                  | 1.77                  | 0.90                   |
| -0.27                  | -0.79                 | -0.15                  |
| 2.87                   | 0.19                  | -0.20                  |
| 0.97                   | 0.65                  | 0.98                   |
| 0.48                   | -0.93                 | -0.17                  |
| 1.76                   | -0.83                 | 0.47                   |
| 0.32                   | 0.02                  | -0.33                  |
| -0.76                  | 0.47                  | 0.26                   |
| -0.32                  | 5.68                  | 1.89                   |



|       |       |       |
|-------|-------|-------|
| -0.66 | -0.22 | 1.02  |
| -1.47 | -0.89 | -0.86 |
| -0.70 | -0.17 | -0.98 |
| -0.95 | 2.08  | 0.75  |
| -0.26 | -1.44 | 4.41  |
| -0.59 | -0.52 | -0.46 |
| -0.64 | -0.26 | -0.52 |
| 4.97  | -0.37 | -0.77 |
| -0.38 | -1.11 | -1.22 |
| -0.49 | 0.33  | -0.34 |
| -0.98 | 3.52  | 0.64  |
| -0.36 | 1.24  | -0.61 |
| -0.91 | -1.11 | 0.13  |
| 0.59  | 0.29  | 1.26  |
| -0.01 | 0.15  | -0.09 |
| -1.50 | 2.85  | 2.03  |
| -0.69 | -1.20 | -0.76 |
| -1.73 | -1.25 | -0.54 |
| -1.07 | 0.94  | 0.93  |
| 0.38  | 0.20  | 0.16  |
| -1.24 | -0.05 | 0.44  |
| -1.23 | -0.17 | -0.38 |
| -1.00 | 0.93  | 1.69  |
| 1.16  | -1.08 | 0.17  |
| 0.25  | -0.87 | -0.17 |
| 0.59  | -0.47 | 2.07  |
| 0.36  | -0.85 | 0.18  |
| 0.09  | -1.08 | -0.43 |
| 0.43  | -0.66 | 0.58  |
| -1.15 | 4.39  | 1.95  |
| 1.64  | -0.74 | -0.39 |
| 1.58  | -0.13 | 2.51  |
| 0.48  | -0.97 | 2.77  |
| -1.27 | -0.13 | 0.92  |
| -1.04 | -1.21 | -0.93 |
| 0.07  | -0.82 | 0.18  |
| -0.19 | 4.46  | -0.36 |
| 0.78  | 4.44  | -0.55 |
| -1.28 | -0.61 | 0.55  |
| 1.60  | 0.30  | -0.84 |
| 2.96  | 0.11  | 0.80  |
| 1.34  | 1.46  | 1.87  |
| 0.14  | -0.71 | -0.45 |
| -1.78 | -0.12 | 2.16  |
| -0.83 | -1.13 | -0.33 |
| -0.55 | -0.20 | 0.00  |
| 0.72  | -1.56 | -1.12 |
| 0.14  | 1.81  | 0.77  |
| -1.07 | 0.29  | -0.63 |
| 0.64  | -1.39 | 0.04  |
| -0.32 | 0.79  | 0.64  |
| -0.94 | 1.89  | 0.69  |
| -0.94 | 2.55  | -1.01 |
| -0.83 | -0.70 | 0.35  |
| -1.38 | 0.51  | -0.33 |
| -0.40 | 0.62  | 1.64  |
| -1.35 | -0.14 | 0.28  |
| -1.14 | 1.18  | -0.06 |
| -0.52 | 0.13  | 0.29  |

|       |       |       |
|-------|-------|-------|
| -0.22 | -0.27 | -0.51 |
| -0.82 | -0.47 | 0.13  |
| -0.66 | 1.35  | -0.16 |
| 0.39  | 5.62  | 0.02  |
| -1.22 | -0.82 | -0.59 |
| 1.12  | -0.77 | -0.18 |
| -0.68 | 4.11  | 0.27  |
| 0     | -1    | 1     |

---

|                        |                      |                        |
|------------------------|----------------------|------------------------|
| 116                    | 117                  | 118                    |
| 10                     | 121                  | 41                     |
| CATTGCACTTGTCTCGGTCTGA | ACTGCCCCAGGTGCTGCTGG | TTCACCACCTTCTCCACCCAGC |
| miR-25-3p              | miR-324-3p           | miR-197-3p             |
| 3413660                | 15277                | 286288                 |
| 1.16                   | 3.54                 | 0.21                   |
| 0.27                   | -1.28                | 1.16                   |
| 2.58                   | -0.31                | -0.97                  |
| 1.36                   | 0.36                 | -0.75                  |
| -0.92                  | -0.93                | 1.99                   |
| -0.22                  | -0.48                | -1.22                  |
| -0.99                  | 0.27                 | -0.04                  |
| -1.07                  | -0.09                | 1.10                   |
| 0.96                   | -0.44                | -0.71                  |
| 1.31                   | 0.13                 | -0.46                  |
| 0.04                   | -0.69                | -0.38                  |
| -1.13                  | -0.69                | -0.84                  |
| 0.10                   | 0.22                 | -0.01                  |
| -0.82                  | -0.23                | 0.25                   |
| 0.75                   | -0.14                | -0.10                  |
| -0.18                  | 0.06                 | -0.52                  |
| -0.68                  | 0.68                 | 0.19                   |
| 0.77                   | 2.45                 | -0.47                  |
| 0.59                   | -0.56                | -0.50                  |
| -0.34                  | -0.33                | -0.50                  |
| 0.24                   | -0.45                | -0.98                  |
| -1.04                  | -0.12                | 1.65                   |
| -1.05                  | 0.15                 | 0.92                   |
| -1.29                  | 0.48                 | 0.42                   |
| -1.05                  | -1.18                | 2.62                   |
| -0.41                  | 0.18                 | -0.84                  |
| 1.07                   | -0.61                | -1.23                  |
| 1.12                   | -0.64                | -1.13                  |
| 1.07                   | -0.80                | 0.08                   |
| 1.73                   | -0.96                | -0.63                  |
| 1.03                   | -1.17                | 0.23                   |
| 3.37                   | -0.96                | -0.55                  |
| 0.17                   | -0.77                | 1.34                   |
| -0.15                  | 0.71                 | 3.08                   |
| 0.94                   | 1.95                 | 1.82                   |
| -0.23                  | -0.38                | 0.77                   |
| -1.41                  | -0.43                | -1.16                  |
| 2.16                   | 0.05                 | -0.43                  |
| 3.03                   | 0.83                 | -0.36                  |

|       |       |       |
|-------|-------|-------|
| -1.00 | -0.56 | 0.56  |
| -1.21 | 4.30  | 8.40  |
| -1.40 | 17.41 | 8.63  |
| -0.82 | 0.38  | -0.21 |
| 1.96  | 0.44  | 0.21  |
| -0.90 | -0.63 | -0.10 |
| -1.61 | 4.19  | 4.35  |
| -0.45 | -0.17 | 0.48  |
| -0.85 | -0.17 | 0.83  |
| -0.73 | 0.86  | -0.35 |
| -0.88 | 0.38  | -0.23 |
| -0.61 | 0.15  | -0.68 |
| -0.86 | -0.23 | 0.00  |
| -0.55 | -0.07 | -0.22 |
| -0.73 | 0.26  | 0.06  |
| -0.69 | -0.67 | -0.84 |
| -0.73 | -0.18 | -0.50 |
| -0.26 | 0.14  | -0.89 |
| 0.10  | -0.48 | -1.33 |
| -0.27 | -0.37 | 0.37  |
| -0.41 | -0.48 | 0.33  |
| -0.88 | -0.95 | 0.60  |
| 0.80  | -0.75 | -1.31 |
| -0.70 | 0.27  | -0.58 |
| -0.60 | -0.45 | -1.09 |
| 0.61  | -0.18 | -1.18 |
| 2.79  | -0.12 | -0.80 |
| 7.24  | 3.06  | -0.90 |
| 3.69  | -0.40 | 1.29  |
| 1.97  | -0.07 | 1.37  |
| 1.63  | -0.06 | 2.17  |
| 0.99  | -0.02 | 0.09  |
| 0.07  | -0.43 | -1.43 |
| 1.55  | -0.02 | -1.05 |
| -0.11 | 0.94  | 0.00  |
| -1.57 | 21.70 | 15.37 |
| -0.42 | -0.23 | -0.85 |
| 0.93  | -0.92 | -0.70 |
| 0.96  | -1.28 | -1.01 |
| 0.72  | 0.17  | -0.64 |
| -0.20 | -0.41 | -0.50 |
| -0.61 | 0.25  | -0.26 |
| 0.00  | -0.18 | -0.30 |
| -1.62 | 0.57  | -0.64 |
| -0.35 | 0.14  | -0.45 |
| 0.14  | -0.75 | -1.23 |
| -0.72 | -0.07 | 0.19  |
| -0.75 | 0.02  | -0.09 |
| -0.30 | 0.32  | -0.10 |
| 0.50  | -0.67 | -0.61 |
| -0.47 | -0.28 | 0.04  |
| 1.16  | -0.98 | -1.22 |
| 0.14  | -0.90 | -0.68 |
| -0.69 | 0.30  | 1.11  |
| 0.58  | -0.65 | -1.08 |
| 3.33  | 1.98  | -0.98 |
| 1.08  | 1.24  | 1.26  |
| 1.00  | 0.47  | 0.26  |











































































































































































|     |       |       |
|-----|-------|-------|
| ave | 43.20 | 33.67 |
|-----|-------|-------|

|           |                          |        |
|-----------|--------------------------|--------|
| beta fits |                          |        |
|           | NP                       | P      |
|           | K-S                      | K-S    |
|           | A-D                      | A-D    |
|           | alpha1                   | alpha1 |
|           | 17.02                    | 12.28  |
|           | alpha2                   | alpha2 |
|           | 27.07                    | 10.94  |
|           | a                        | a      |
|           | 25.85                    | 16.43  |
|           | b                        | b      |
|           | 133.12                   | 56.43  |
|           | p-val of ave of observed |        |
|           | 0.00                     | 0.17   |
|           | observed aves            |        |
|           | 43.20                    | 33.67  |































































|                        |                        |                        |
|------------------------|------------------------|------------------------|
| 18                     | 19                     | 20                     |
| TGAGGTAGTAGTTTGTACAGTT | TGAGGTAGTAGGTTGTGTGGTT | TGAGGTAGTAGATTGTATAGTT |
| let-7g-5p              | let-7b-5p              | let-7f-5p              |
| 1899491                | 1666971                | 1418336                |
| 0.24                   | 0.85                   | 0.04                   |
| 0.15                   | 0.28                   | 0.19                   |
| 0.51                   | 0.68                   | 0.30                   |
| 0.54                   | 0.65                   | 0.14                   |
| 0.73                   | 0.55                   | 0.29                   |
| 0.40                   | 0.39                   | 0.21                   |
| 0.60                   | 0.40                   | 0.09                   |
| 0.12                   | 0.55                   | 0.03                   |
| 0.18                   | 0.40                   | 0.13                   |
| 0.30                   | 0.43                   | 0.26                   |
| 0.20                   | 0.23                   | 0.27                   |
| 0.34                   | 0.42                   | 0.24                   |
| 0.79                   | 0.31                   | 1.07                   |
| 0.14                   | 0.74                   | 0.04                   |
| 0.30                   | 0.41                   | 0.25                   |
| 0.43                   | 0.22                   | 0.51                   |
| 0.20                   | 0.58                   | 0.03                   |
| 0.26                   | 0.51                   | 0.23                   |
| 0.20                   | 0.19                   | 0.19                   |
| 0.41                   | 0.30                   | 0.56                   |
| 0.51                   | 0.35                   | 0.19                   |
| 0.39                   | 0.46                   | 0.07                   |
| 0.41                   | 0.59                   | 0.09                   |
| 0.26                   | 0.79                   | 0.04                   |
| 0.27                   | 0.53                   | 0.09                   |
| 0.37                   | 0.44                   | 0.06                   |
| 0.42                   | 0.35                   | 0.31                   |
| 0.64                   | 0.30                   | 1.02                   |
| 0.38                   | 0.17                   | 0.44                   |
| 0.16                   | 0.24                   | 0.20                   |
| 0.13                   | 0.66                   | 0.06                   |
| 0.31                   | 0.26                   | 0.52                   |
| 0.57                   | 0.46                   | 0.57                   |
| 0.16                   | 0.49                   | 0.06                   |
| 0.13                   | 0.67                   | 0.07                   |
| 0.54                   | 0.27                   | 0.09                   |
| 0.06                   | 0.83                   | 0.02                   |
| 0.48                   | 0.27                   | 0.26                   |
| 0.48                   | 0.28                   | 0.47                   |
| 0.34                   | 0.29                   | 0.16                   |
| 0.22                   | 0.73                   | 0.03                   |
| 0.31                   | 1.11                   | 0.04                   |
| 0.30                   | 0.36                   | 0.06                   |
| 0.44                   | 0.19                   | 0.26                   |
| 0.09                   | 0.25                   | 0.08                   |
| 0.13                   | 0.72                   | 0.02                   |
| 0.37                   | 0.18                   | 0.21                   |
| 0.31                   | 0.30                   | 0.13                   |
| 0.21                   | 0.33                   | 0.16                   |
| 0.26                   | 0.30                   | 0.08                   |

|      |      |      |
|------|------|------|
| 0.28 | 0.25 | 0.18 |
| 0.35 | 0.36 | 0.05 |
| 0.29 | 0.56 | 0.07 |
| 0.58 | 0.34 | 0.22 |
| 0.34 | 0.36 | 0.15 |
| 0.19 | 0.49 | 0.04 |
| 0.49 | 0.36 | 0.18 |
| 0.88 | 0.26 | 0.78 |
| 0.61 | 0.49 | 0.09 |
| 0.88 | 0.45 | 0.40 |
| 0.86 | 0.37 | 0.32 |
| 0.69 | 0.29 | 0.71 |
| 0.22 | 0.67 | 0.04 |
| 0.50 | 0.50 | 0.12 |
| 0.63 | 0.50 | 0.25 |
| 0.65 | 0.51 | 0.75 |
| 0.27 | 0.42 | 0.18 |
| 0.17 | 0.29 | 0.23 |
| 1.27 | 1.61 | 0.39 |
| 0.87 | 0.72 | 0.34 |
| 0.47 | 0.46 | 0.14 |
| 0.79 | 0.10 | 1.30 |
| 0.54 | 0.50 | 0.35 |
| 0.44 | 0.62 | 0.52 |
| 0.07 | 1.88 | 0.01 |
| 0.74 | 0.34 | 0.59 |
| 0.25 | 0.20 | 0.20 |
| 0.15 | 0.30 | 0.33 |
| 0.48 | 0.34 | 0.35 |
| 0.35 | 0.24 | 0.28 |
| 0.11 | 0.50 | 0.05 |
| 0.68 | 0.33 | 0.29 |
| 0.11 | 0.25 | 0.07 |
| 0.44 | 0.24 | 0.68 |
| 0.69 | 0.26 | 1.09 |
| 0.14 | 0.26 | 0.08 |
| 0.49 | 0.29 | 0.21 |
| 0.39 | 0.35 | 0.10 |
| 0.41 | 0.21 | 0.54 |
| 0.34 | 0.29 | 0.12 |
| 1.63 | 0.36 | 1.52 |
| 0.32 | 0.22 | 0.09 |
| 0.42 | 0.51 | 0.08 |
| 0.41 | 0.29 | 0.24 |
| 0.57 | 0.44 | 0.10 |
| 0.00 | 0.00 | 0.00 |
| 0.00 | 0.00 | 0.00 |
| 0.00 | 0.00 | 0.00 |





19

20

21

---

*D\_4*

*E\_47*

*F\_43*

---



|       |       |       |
|-------|-------|-------|
| 0.18  |       |       |
| -0.08 | -0.14 |       |
| -0.08 | -0.38 | 0.00  |
| -0.16 | -0.37 | 0.13  |
| -0.36 | -0.41 | 0.21  |
| -0.21 | -0.30 | -0.22 |
| 0.08  | -0.24 | -0.21 |
| 0.09  | 0.48  | -0.15 |
| -0.03 | 0.72  | -0.08 |
| 0.52  | 0.13  | 0.11  |
| 0.46  | 0.07  | 0.24  |
| -0.20 | -0.28 | 0.24  |
| 0.36  | 0.09  | 0.11  |
| -0.13 | 0.05  | -0.25 |
| 0.15  | -0.13 | -0.19 |
| 0.22  | -0.16 | -0.25 |
| 0.05  | -0.17 | 0.04  |
| -0.37 | -0.15 | 0.28  |
| 0.40  | 0.04  | 0.07  |
| 0.31  | 0.34  | -0.17 |
| 0.38  | 0.00  | -0.23 |
| -0.03 | -0.27 | -0.10 |
| -0.06 | -0.23 | -0.07 |
| -0.09 | -0.39 | 0.12  |
| 0.52  | 0.23  | -0.01 |
| 0.28  | -0.22 | 0.12  |
| -0.15 | -0.29 | -0.04 |
| 0.40  | 0.30  | -0.18 |
| 0.19  | -0.17 | 0.06  |
| 0.07  | 0.27  | -0.15 |
| 0.20  | 0.05  | -0.20 |
| 0.13  | 0.16  | -0.04 |
| -0.12 | -0.35 | 0.07  |
| -0.22 | -0.34 | 0.18  |
| 0.08  | -0.05 | 0.03  |
| -0.13 | -0.22 | 0.61  |

|       |       |       |
|-------|-------|-------|
| -0.06 | -0.28 | 0.09  |
| -0.23 | -0.19 | 0.23  |
| -0.01 | 0.83  | -0.10 |
| -0.02 | -0.36 | 0.00  |
| 0.03  | -0.01 | -0.03 |
| -0.01 | 0.02  | -0.20 |
| -0.03 | 0.80  | -0.07 |
| -0.12 | -0.02 | -0.01 |
| -0.29 | 0.01  | 0.07  |
| 0.00  | 0.39  | -0.06 |
| 0.17  | 0.05  | 0.28  |
| 0.07  | 0.27  | -0.04 |
| 0.26  | -0.16 | 0.10  |
| -0.44 | -0.26 | 0.08  |
| -0.02 | -0.05 | -0.11 |
| -0.10 | -0.14 | 0.35  |
| 0.27  | 0.33  | 0.16  |
| -0.17 | 0.26  | 0.22  |
| 0.12  | 0.35  | -0.23 |
| -0.07 | -0.26 | -0.10 |
| -0.06 | 0.24  | 0.09  |
| 0.79  | 0.15  | -0.08 |
| 0.35  | -0.09 | 0.21  |
| 0.20  | 0.40  | -0.22 |
| 0.34  | 0.35  | -0.15 |
| -0.04 | 0.00  | -0.20 |
| 0.14  | 0.13  | 0.08  |
| -0.01 | -0.10 | -0.04 |
| 0.15  | 0.92  | -0.18 |
| -0.03 | 0.87  | -0.05 |
| 0.27  | 0.11  | -0.17 |
| 0.31  | 0.23  | -0.16 |
| -0.07 | 0.11  | 0.08  |
| 0.65  | 0.43  | 0.11  |
| 0.24  | 0.07  | 0.02  |
| 0.14  | 0.33  | 0.06  |
| 0.31  | -0.09 | 0.59  |
| -0.09 | -0.30 | 0.10  |
| 0.31  | 0.25  | 0.07  |
| 0.09  | -0.01 | 0.15  |

| 17                     | 18                      | 19                   |
|------------------------|-------------------------|----------------------|
| 119                    | 120                     | 121                  |
| ACAGTAGTCTGCACATTGGTTA | TATTCATTTATCCCCAGCCTACA | ACTGCCCCAGGTGCTGCTGG |
| miR-199b-3p            | miR-664a-3p             | miR-324-3p           |
| 16186                  | 15369                   | 15277                |
| -0.55                  | 0.57                    | 3.54                 |
| -0.68                  | -0.33                   | -1.28                |
| -0.47                  | -0.35                   | -0.31                |
| -0.58                  | -0.58                   | 0.36                 |
| 1.93                   | 4.31                    | -0.93                |
| -0.07                  | -0.83                   | -0.48                |
| 0.30                   | -0.68                   | 0.27                 |
| -0.86                  | -0.16                   | -0.09                |
| -0.96                  | -0.48                   | -0.44                |
| -0.85                  | 0.04                    | 0.13                 |
| 0.00                   | 0.21                    | -0.69                |
| -0.78                  | -0.78                   | -0.69                |
| 2.25                   | 0.02                    | 0.22                 |
| -1.02                  | 0.37                    | -0.23                |
| -0.64                  | 0.00                    | -0.14                |
| 2.80                   | -0.01                   | 0.06                 |
| -0.92                  | 0.15                    | 0.68                 |
| 0.00                   | -0.47                   | 2.45                 |
| -0.66                  | 0.61                    | -0.56                |
| 0.90                   | -0.51                   | -0.33                |

|       |       |       |
|-------|-------|-------|
| -0.15 | -0.84 | -0.45 |
| -0.20 | -0.60 | -0.12 |
| 0.98  | -0.39 | 0.15  |
| -0.17 | -0.71 | 0.48  |
| 0.47  | 0.89  | -1.18 |
| -0.33 | 0.90  | 0.18  |
| 0.26  | -0.34 | -0.61 |
| 1.89  | -0.48 | -0.64 |
| 1.02  | -0.49 | -0.80 |
| -0.86 | -0.51 | -0.96 |
| -0.98 | -0.80 | -1.17 |
| 0.75  | -0.48 | -0.96 |
| 4.41  | 4.67  | -0.77 |
| -0.46 | 1.13  | 0.71  |
| -0.52 | 2.86  | 1.95  |
| -0.77 | 0.33  | -0.38 |
| -1.22 | -1.03 | -0.43 |
| -0.34 | 0.00  | 0.05  |
| 0.64  | 2.22  | 0.83  |
| -0.61 | 1.44  | -0.56 |
| 0.13  | -0.99 | 4.30  |
| 1.26  | -1.00 | 17.41 |
| -0.09 | -0.36 | 0.38  |
| 2.03  | 0.22  | 0.44  |
| -0.76 | 0.08  | -0.63 |
| -0.54 | -1.02 | 4.19  |
| 0.93  | -0.38 | -0.17 |
| 0.16  | -0.62 | -0.17 |
| 0.44  | -0.40 | 0.86  |
| -0.38 | -0.59 | 0.38  |
| 1.69  | -0.53 | 0.15  |
| 0.17  | -0.50 | -0.23 |
| -0.17 | -0.51 | -0.07 |
| 2.07  | -0.14 | 0.26  |
| 0.18  | -0.96 | -0.67 |
| -0.43 | -0.77 | -0.18 |
| 0.58  | -0.74 | 0.14  |
| 1.95  | -0.28 | -0.48 |
| -0.39 | -0.22 | -0.37 |
| 2.51  | 0.57  | -0.48 |
| 2.77  | 1.88  | -0.95 |
| 0.92  | -0.91 | -0.75 |
| -0.93 | -0.64 | 0.27  |
| 0.18  | -0.39 | -0.45 |
| -0.36 | -0.66 | -0.18 |
| -0.55 | -0.53 | -0.12 |
| 0.55  | 0.23  | 3.06  |
| -0.84 | 0.15  | -0.40 |
| 0.80  | 1.22  | -0.07 |
| 1.87  | 0.67  | -0.06 |
| -0.45 | -0.68 | -0.02 |
| 2.16  | -0.90 | -0.43 |
| -0.33 | -0.34 | -0.02 |
| 0.00  | 0.82  | 0.94  |
| -1.12 | -0.85 | 21.70 |
| 0.77  | -0.63 | -0.23 |
| -0.63 | 0.14  | -0.92 |
| 0.04  | -0.72 | -1.28 |
| 0.64  | 0.47  | 0.17  |

|       |       |       |
|-------|-------|-------|
| 0.69  | -0.29 | -0.41 |
| -1.01 | -0.45 | 0.25  |
| 0.35  | -0.54 | -0.18 |
| -0.33 | -0.83 | 0.57  |
| 1.64  | 0.57  | 0.14  |
| 0.28  | -0.98 | -0.75 |
| -0.06 | -0.23 | -0.07 |
| 0.29  | -0.57 | 0.02  |
| -0.51 | -0.55 | 0.32  |
| 0.13  | -0.59 | -0.67 |
| -0.16 | -0.39 | -0.28 |
| 0.02  | -0.93 | -0.98 |
| -0.59 | -0.94 | -0.90 |
| -0.18 | -0.64 | 0.30  |
| 0.27  | -0.50 | -0.65 |
| 0.85  | 0.75  | 1.98  |
| -1    | -1    | -1    |
| 0.00  | 0.00  | 0.00  |
| 1.00  | 1.00  | 1.00  |
| 0.21  | 0.22  | 0.88  |

| 119                    | 120                     | 121                  |
|------------------------|-------------------------|----------------------|
| ACAGTAGTCTGCACATTGGTTA | TATTCATTTATCCCCAGCCTACA | ACTGCCCCAGGTGCTGCTGG |
| miR-199b-3p            | miR-664a-3p             | miR-324-3p           |
| 16186                  | 15369                   | 15277                |
| -0.55                  | 0.57                    | 3.54                 |
| -0.68                  | -0.33                   | -1.28                |
| -0.47                  | -0.35                   | -0.31                |
| -0.58                  | -0.58                   | 0.36                 |
| 1.93                   | 4.31                    | -0.93                |
| -0.07                  | -0.83                   | -0.48                |
| 0.30                   | -0.68                   | 0.27                 |
| -0.86                  | -0.16                   | -0.09                |
| -0.96                  | -0.48                   | -0.44                |
| -0.85                  | 0.04                    | 0.13                 |
| 0.00                   | 0.21                    | -0.69                |
| -0.78                  | -0.78                   | -0.69                |
| 2.25                   | 0.02                    | 0.22                 |
| -1.02                  | 0.37                    | -0.23                |
| -0.64                  | 0.00                    | -0.14                |
| 2.80                   | -0.01                   | 0.06                 |
| -0.92                  | 0.15                    | 0.68                 |
| 0.00                   | -0.47                   | 2.45                 |
| -0.66                  | 0.61                    | -0.56                |
| 0.90                   | -0.51                   | -0.33                |
| -0.15                  | -0.84                   | -0.45                |
| -0.20                  | -0.60                   | -0.12                |
| 0.98                   | -0.39                   | 0.15                 |
| -0.17                  | -0.71                   | 0.48                 |
| 0.47                   | 0.89                    | -1.18                |
| -0.33                  | 0.90                    | 0.18                 |
| 0.26                   | -0.34                   | -0.61                |
| 1.89                   | -0.48                   | -0.64                |

|       |       |       |
|-------|-------|-------|
| 1.02  | -0.49 | -0.80 |
| -0.86 | -0.51 | -0.96 |
| -0.98 | -0.80 | -1.17 |
| 0.75  | -0.48 | -0.96 |
| 4.41  | 4.67  | -0.77 |
| -0.46 | 1.13  | 0.71  |
| -0.52 | 2.86  | 1.95  |
| -0.77 | 0.33  | -0.38 |
| -1.22 | -1.03 | -0.43 |
| -0.34 | 0.00  | 0.05  |
| 0.64  | 2.22  | 0.83  |
| -0.61 | 1.44  | -0.56 |
| 0.13  | -0.99 | 4.30  |
| 1.26  | -1.00 | 17.41 |
| -0.09 | -0.36 | 0.38  |
| 2.03  | 0.22  | 0.44  |
| -0.76 | 0.08  | -0.63 |
| -0.54 | -1.02 | 4.19  |
| 0.93  | -0.38 | -0.17 |
| 0.16  | -0.62 | -0.17 |
| 0.44  | -0.40 | 0.86  |
| -0.38 | -0.59 | 0.38  |
| 1.69  | -0.53 | 0.15  |
| 0.17  | -0.50 | -0.23 |
| -0.17 | -0.51 | -0.07 |
| 2.07  | -0.14 | 0.26  |
| 0.18  | -0.96 | -0.67 |
| -0.43 | -0.77 | -0.18 |
| 0.58  | -0.74 | 0.14  |
| 1.95  | -0.28 | -0.48 |
| -0.39 | -0.22 | -0.37 |
| 2.51  | 0.57  | -0.48 |
| 2.77  | 1.88  | -0.95 |
| 0.92  | -0.91 | -0.75 |
| -0.93 | -0.64 | 0.27  |
| 0.18  | -0.39 | -0.45 |
| -0.36 | -0.66 | -0.18 |
| -0.55 | -0.53 | -0.12 |
| 0.55  | 0.23  | 3.06  |
| -0.84 | 0.15  | -0.40 |
| 0.80  | 1.22  | -0.07 |
| 1.87  | 0.67  | -0.06 |
| -0.45 | -0.68 | -0.02 |
| 2.16  | -0.90 | -0.43 |
| -0.33 | -0.34 | -0.02 |
| 0.00  | 0.82  | 0.94  |
| -1.12 | -0.85 | 21.70 |
| 0.77  | -0.63 | -0.23 |
| -0.63 | 0.14  | -0.92 |
| 0.04  | -0.72 | -1.28 |
| 0.64  | 0.47  | 0.17  |
| 0.69  | -0.29 | -0.41 |
| -1.01 | -0.45 | 0.25  |
| 0.35  | -0.54 | -0.18 |
| -0.33 | -0.83 | 0.57  |
| 1.64  | 0.57  | 0.14  |
| 0.28  | -0.98 | -0.75 |
| -0.06 | -0.23 | -0.07 |
| 0.29  | -0.57 | 0.02  |

|       |       |       |
|-------|-------|-------|
| -0.51 | -0.55 | 0.32  |
| 0.13  | -0.59 | -0.67 |
| -0.16 | -0.39 | -0.28 |
| 0.02  | -0.93 | -0.98 |
| -0.59 | -0.94 | -0.90 |
| -0.18 | -0.64 | 0.30  |
| 0.27  | -0.50 | -0.65 |
| 1     | 1     | 2     |

---

|                         |                        |                      |
|-------------------------|------------------------|----------------------|
| 119                     | 120                    | 121                  |
| 57                      | 71                     | 52                   |
| AATGACACGATCACTCCCGTTGA | CTATACGACCTGCTGCCTTTCT | ATCACATTGCCAGGGATTTC |
| miR-425-5p              | let-7d-3p              | miR-23a-3p           |
| 127210                  | 71988                  | 151875               |
| -0.26                   | 2.00                   | -0.46                |
| 0.03                    | -0.96                  | -0.31                |
| 1.92                    | -1.06                  | -0.42                |
| -0.63                   | -1.08                  | -0.72                |
| 2.63                    | 1.76                   | 3.79                 |
| -0.62                   | 2.96                   | -0.43                |
| -1.13                   | 1.52                   | -0.49                |
| -0.89                   | 0.51                   | -0.64                |
| 0.01                    | -0.69                  | -0.57                |
| -0.20                   | -0.60                  | -0.39                |
| 0.29                    | -0.34                  | 0.41                 |
| -1.51                   | -0.40                  | -0.66                |
| 0.92                    | -0.14                  | 2.51                 |
| -1.00                   | -0.45                  | -0.67                |
| 1.11                    | -0.39                  | -0.02                |
| 1.17                    | 0.00                   | 0.47                 |
| 0.70                    | 0.45                   | -0.19                |
| 0.16                    | -0.47                  | 0.09                 |
| -0.43                   | -0.61                  | 0.37                 |
| 0.05                    | -0.72                  | 0.06                 |
| -1.06                   | -0.43                  | -0.53                |
| -1.06                   | 0.11                   | -0.42                |
| -0.72                   | 0.04                   | -0.47                |
| -1.10                   | -0.19                  | -0.67                |
| 0.54                    | 0.40                   | 0.38                 |
| 0.82                    | -0.16                  | 0.35                 |
| 0.23                    | -1.04                  | -0.36                |
| 0.53                    | -1.28                  | -0.27                |
| -0.31                   | -0.73                  | 0.10                 |
| -1.03                   | -0.94                  | -0.39                |
| -0.97                   | -0.76                  | -0.88                |
| -0.42                   | -0.98                  | -0.17                |
| 4.83                    | 0.55                   | 4.70                 |
| 0.16                    | 1.63                   | -0.22                |
| 1.49                    | 0.28                   | 1.20                 |
| -0.51                   | 0.33                   | -0.23                |
| -1.51                   | -0.01                  | -0.95                |
| -0.80                   | 0.55                   | 0.70                 |
| 1.79                    | -0.02                  | 1.83                 |

|       |       |       |
|-------|-------|-------|
| -0.28 | -0.33 | 0.46  |
| 0.22  | 1.22  | 0.03  |
| 3.05  | 0.55  | 0.23  |
| 0.14  | 0.23  | -0.33 |
| 1.17  | -0.07 | 1.56  |
| -0.77 | 0.24  | -0.40 |
| -0.98 | 1.15  | -0.73 |
| 1.83  | -0.23 | 0.97  |
| -0.49 | 0.47  | 0.02  |
| 0.75  | 0.02  | -0.17 |
| 0.57  | -0.31 | -0.19 |
| 0.13  | -0.21 | -0.14 |
| -0.04 | 0.31  | -0.22 |
| -0.40 | 0.12  | -0.22 |
| 1.67  | 0.24  | 1.39  |
| -0.86 | 0.32  | -0.61 |
| 0.15  | -0.19 | -0.42 |
| -0.17 | -0.38 | -0.41 |
| 0.07  | -1.23 | -0.33 |
| 0.25  | -0.33 | -0.19 |
| 1.94  | 0.48  | 0.86  |
| 2.73  | 0.37  | 1.11  |
| 0.27  | -1.31 | -0.52 |
| 0.01  | -0.53 | -0.72 |
| -0.09 | -0.25 | -0.61 |
| 0.87  | -1.02 | -0.46 |
| -1.72 | -1.12 | -0.68 |
| 0.94  | -0.55 | -0.34 |
| 0.10  | 0.29  | 0.10  |
| 0.88  | 0.05  | -0.20 |
| 1.67  | -0.18 | 0.60  |
| -1.09 | -0.70 | -0.70 |
| 0.47  | 0.94  | -0.61 |
| -0.34 | -0.75 | -0.23 |
| 0.28  | -0.44 | 0.58  |
| -0.39 | 3.01  | 0.02  |
| -0.40 | -0.39 | -0.27 |
| -0.34 | -0.71 | 0.40  |
| -1.32 | 0.03  | -0.42 |
| 1.33  | -0.95 | 0.95  |
| 1.98  | -0.64 | 0.94  |
| 1.68  | -0.36 | -0.42 |
| 0.21  | -0.72 | 0.55  |
| -0.99 | 2.09  | -0.38 |
| -0.29 | -0.63 | 0.88  |
| -0.40 | -1.22 | -0.41 |
| 0.59  | 0.02  | 0.08  |
| 0.09  | -0.36 | 0.32  |
| 0.21  | -0.56 | -0.22 |
| -0.41 | -0.64 | 0.19  |
| 0.42  | -0.36 | 0.29  |
| -1.21 | -1.24 | -0.28 |
| -1.52 | -0.50 | -0.57 |
| -0.48 | 0.04  | -0.44 |
| -0.23 | -0.91 | -0.21 |
| -0.39 | 0.11  | -0.28 |
| 1.32  | 1.34  | 1.41  |
| 0.80  | 0.70  | 1.00  |













































































































































































18.85

UC  
K-S

A-D

alpha1

48.20

alpha2

8.30

a

33.20

b

95.54

#NUM!

18.85

|             |
|-------------|
| Student     |
| pseudo data |
| trials      |
| 1000        |
| 100         |
| 10          |

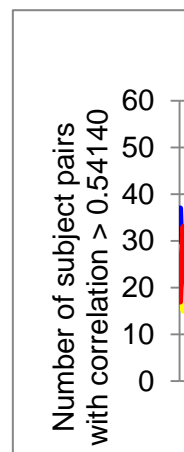































































| 21                     | 22                    | 23                      |
|------------------------|-----------------------|-------------------------|
| AGCTCGGTCTGAGGCCCTCAGT | TTCAAGTAATTCAGGATAGGT | AGCAGCATTGTACAGGGCTATGA |
| miR-423-3p             | miR-26b-5p            | miR-103a-3p             |
| 1093922                | 1034642               | 1030775                 |
| 0.30                   | 0.03                  | 0.21                    |
| 0.02                   | 0.13                  | 0.26                    |
| 0.10                   | 0.17                  | 0.29                    |
| 0.15                   | 0.11                  | 0.18                    |
| 0.05                   | 0.40                  | 0.35                    |
| 0.65                   | 0.10                  | 0.10                    |
| 0.84                   | 0.11                  | 0.19                    |
| 0.38                   | 0.03                  | 0.10                    |
| 0.17                   | 0.06                  | 0.11                    |
| 0.12                   | 0.10                  | 0.15                    |
| 0.17                   | 0.16                  | 0.13                    |
| 0.66                   | 0.05                  | 0.14                    |
| 0.22                   | 0.70                  | 0.33                    |
| 0.34                   | 0.03                  | 0.12                    |
| 0.20                   | 0.16                  | 0.37                    |
| 0.37                   | 0.29                  | 0.32                    |
| 0.28                   | 0.03                  | 0.17                    |
| 0.30                   | 0.12                  | 0.50                    |
| 0.06                   | 0.25                  | 0.30                    |
| 0.27                   | 0.47                  | 0.29                    |
| 0.28                   | 0.11                  | 0.20                    |
| 0.69                   | 0.04                  | 0.21                    |
| 0.53                   | 0.04                  | 0.23                    |
| 0.63                   | 0.02                  | 0.16                    |
| 0.05                   | 0.10                  | 0.10                    |
| 0.09                   | 0.13                  | 0.14                    |
| 0.07                   | 0.32                  | 0.13                    |
| 0.09                   | 0.43                  | 0.22                    |
| 0.11                   | 0.27                  | 0.20                    |
| 0.04                   | 0.11                  | 0.23                    |
| 0.03                   | 0.03                  | 0.21                    |
| 0.02                   | 0.28                  | 0.34                    |
| 0.03                   | 0.70                  | 0.33                    |
| 0.56                   | 0.08                  | 0.14                    |
| 0.15                   | 0.05                  | 0.24                    |
| 0.43                   | 0.11                  | 0.14                    |
| 0.46                   | 0.00                  | 0.03                    |
| 0.10                   | 0.15                  | 0.25                    |
| 0.09                   | 0.36                  | 0.31                    |
| 0.20                   | 0.15                  | 0.19                    |
| 0.41                   | 0.04                  | 0.26                    |
| 0.86                   | 0.03                  | 0.48                    |
| 0.42                   | 0.05                  | 0.19                    |
| 0.22                   | 0.28                  | 0.37                    |
| 0.22                   | 0.05                  | 0.18                    |
| 0.60                   | 0.02                  | 0.11                    |
| 0.25                   | 0.29                  | 0.22                    |
| 0.52                   | 0.09                  | 0.25                    |
| 0.43                   | 0.14                  | 0.31                    |
| 0.43                   | 0.10                  | 0.23                    |

|      |      |      |
|------|------|------|
| 0.27 | 0.19 | 0.32 |
| 0.37 | 0.07 | 0.20 |
| 0.25 | 0.06 | 0.19 |
| 0.40 | 0.20 | 0.37 |
| 0.43 | 0.07 | 0.15 |
| 0.18 | 0.05 | 0.15 |
| 0.27 | 0.12 | 0.20 |
| 0.07 | 0.68 | 0.15 |
| 0.16 | 0.10 | 0.13 |
| 0.08 | 0.38 | 0.29 |
| 0.05 | 0.40 | 0.26 |
| 0.07 | 0.55 | 0.16 |
| 0.19 | 0.05 | 0.07 |
| 0.25 | 0.06 | 0.08 |
| 0.09 | 0.21 | 0.11 |
| 0.38 | 0.08 | 0.39 |
| 0.07 | 0.18 | 0.18 |
| 0.01 | 0.11 | 0.42 |
| 0.12 | 0.23 | 0.57 |
| 0.14 | 0.45 | 0.60 |
| 0.27 | 0.12 | 0.23 |
| 0.03 | 0.23 | 0.12 |
| 0.21 | 0.17 | 0.16 |
| 0.25 | 0.32 | 0.32 |
| 0.76 | 0.01 | 0.23 |
| 0.41 | 0.28 | 0.27 |
| 0.03 | 0.19 | 0.30 |
| 0.06 | 0.09 | 0.20 |
| 0.11 | 0.49 | 0.49 |
| 0.18 | 0.31 | 0.22 |
| 0.22 | 0.05 | 0.13 |
| 0.21 | 0.32 | 0.20 |
| 0.73 | 0.04 | 0.16 |
| 0.23 | 0.44 | 0.35 |
| 0.10 | 0.64 | 0.26 |
| 0.29 | 0.10 | 0.22 |
| 0.30 | 0.33 | 0.26 |
| 0.30 | 0.14 | 0.18 |
| 0.12 | 0.44 | 0.39 |
| 0.26 | 0.15 | 0.23 |
| 0.22 | 0.40 | 0.32 |
| 0.16 | 0.11 | 0.18 |
| 0.55 | 0.06 | 0.18 |
| 0.07 | 0.23 | 0.13 |
| 0.10 | 0.15 | 0.14 |
| 0.00 | 0.00 | 0.00 |
| 0.00 | 0.00 | 0.00 |
| 0.00 | 0.00 | 0.00 |





22

23

24

---

*F\_6*

*F\_7*

*F\_8*

---

|       |       |       |
|-------|-------|-------|
| 0.78  |       |       |
| 0.56  | 0.74  |       |
| 0.13  | 0.07  | 0.01  |
| 0.19  | 0.14  | 0.04  |
| -0.42 | -0.47 | -0.54 |
| -0.46 | -0.46 | -0.40 |
| -0.21 | -0.32 | -0.46 |
| -0.42 | -0.49 | -0.40 |
| -0.13 | -0.12 | 0.12  |
| -0.33 | -0.40 | -0.46 |
| -0.36 | -0.37 | -0.42 |
| 0.27  | 0.21  | 0.22  |
| -0.05 | -0.04 | 0.06  |
| 0.51  | 0.36  | 0.24  |
| 0.09  | 0.10  | 0.47  |
| -0.11 | -0.19 | -0.30 |
| -0.38 | -0.41 | -0.47 |
| 0.34  | 0.26  | 0.03  |
| 0.26  | 0.28  | 0.39  |
| 0.20  | 0.23  | 0.34  |
| 0.42  | 0.46  | 0.39  |
| -0.33 | -0.27 | -0.40 |
| 0.42  | 0.31  | 0.31  |
| 0.25  | 0.32  | 0.55  |
| -0.06 | -0.09 | -0.41 |
| 0.66  | 0.61  | 0.34  |
| -0.04 | 0.10  | -0.04 |
| 0.35  | 0.34  | 0.13  |
| 0.14  | 0.10  | -0.15 |
| 0.40  | 0.28  | 0.19  |
| 0.26  | 0.21  | 0.21  |
| 0.12  | 0.22  | -0.07 |
| 0.43  | 0.44  | 0.41  |

|       |       |       |
|-------|-------|-------|
| 0.32  | 0.24  | 0.21  |
| 0.19  | 0.01  | -0.03 |
| -0.43 | -0.41 | -0.37 |
| 0.57  | 0.50  | 0.35  |
| 0.01  | 0.10  | -0.17 |
| -0.11 | -0.09 | -0.26 |
| -0.49 | -0.49 | -0.43 |
| 0.10  | 0.15  | 0.28  |
| 0.11  | 0.12  | 0.07  |
| -0.39 | -0.30 | -0.40 |
| 0.09  | 0.10  | 0.09  |
| -0.57 | -0.56 | -0.47 |
| -0.26 | -0.28 | -0.27 |
| 0.03  | 0.20  | 0.24  |
| 0.06  | 0.09  | -0.15 |
| 0.23  | 0.12  | 0.16  |
| -0.22 | -0.29 | -0.39 |
| -0.45 | -0.43 | -0.33 |
| -0.24 | -0.31 | -0.31 |
| 0.18  | 0.23  | 0.38  |
| 0.02  | -0.06 | -0.18 |
| -0.26 | -0.35 | -0.46 |
| 0.11  | -0.10 | -0.17 |
| -0.36 | -0.34 | -0.47 |
| -0.26 | -0.22 | -0.52 |
| -0.03 | 0.11  | 0.06  |
| -0.08 | -0.11 | -0.35 |
| 0.44  | 0.41  | 0.39  |
| -0.35 | -0.38 | -0.38 |
| -0.41 | -0.42 | -0.33 |
| 0.15  | 0.17  | -0.07 |
| 0.17  | 0.14  | -0.20 |
| -0.08 | -0.03 | -0.09 |
| -0.20 | -0.24 | -0.47 |
| 0.10  | 0.11  | -0.16 |
| -0.19 | -0.20 | -0.33 |
| 0.21  | 0.15  | 0.11  |
| 0.83  | 0.77  | 0.55  |
| -0.30 | -0.30 | -0.45 |
| -0.24 | -0.23 | -0.22 |

| 20                     | 21                    | 22                     |
|------------------------|-----------------------|------------------------|
| 122                    | 123                   | 124                    |
| TAACAGTCTACAGCCATGGTCG | AATATAACACAGATGGCCTGT | AAAGTTCTGAGACACTCCGACT |
| miR-132-3p             | miR-410               | miR-148a-5p            |
| 15261                  | 14130                 | 13673                  |
| 0.91                   | 0.77                  | -0.12                  |
| -2.06                  | -0.96                 | -0.50                  |
| -0.75                  | 0.09                  | 0.06                   |
| 0.24                   | -0.66                 | -0.29                  |
| -0.87                  | -0.96                 | -0.34                  |
| 0.62                   | -0.67                 | -0.69                  |
| 1.64                   | -0.07                 | -0.70                  |
| 0.91                   | -0.71                 | -0.69                  |
| -0.97                  | -0.04                 | -0.55                  |
| 0.27                   | -0.68                 | -0.82                  |
| -0.59                  | -0.08                 | 0.11                   |
| 0.78                   | -0.85                 | -0.40                  |
| 1.88                   | -0.71                 | 2.24                   |
| 1.28                   | -0.50                 | -0.41                  |
| -0.47                  | 0.58                  | 0.05                   |
| 0.46                   | 0.61                  | 0.89                   |
| 0.45                   | 0.27                  | -0.01                  |
| 0.38                   | 2.22                  | -0.97                  |
| 0.22                   | 0.14                  | 3.48                   |
| -0.57                  | -0.37                 | 1.35                   |



|       |       |       |
|-------|-------|-------|
| 0.09  | -0.82 | -0.66 |
| 0.35  | 1.00  | 0.65  |
| -0.24 | -0.05 | 0.22  |
| 0.31  | -0.49 | -0.49 |
| -2.06 | -0.77 | -0.73 |
| -0.72 | 0.29  | -0.65 |
| -1.52 | 3.42  | -0.04 |
| -1.24 | 1.28  | 0.44  |
| -0.10 | 0.84  | 1.50  |
| -0.31 | -0.09 | 0.91  |
| -0.99 | -0.54 | -0.69 |
| -0.63 | 0.10  | 2.19  |
| -1.63 | -0.79 | -0.47 |
| 1.49  | -0.09 | -0.25 |
| 1.57  | -0.62 | -0.22 |
| 1.30  | -0.81 | -0.20 |
| -0.96 | -0.84 | -1.10 |
| -0.46 | 1.01  | 0.74  |
| 0.79  | 0.14  | 1.94  |
| 0.57  | -0.47 | 0.65  |
| -1.57 | -0.81 | -0.58 |
| -1.17 | -0.96 | 0.34  |
| 0.33  | -0.39 | -0.56 |
| 0.76  | -0.53 | 1.53  |
| 1.00  | -0.12 | 0.69  |
| -1.55 | -0.72 | -1.02 |
| -0.04 | 1.33  | 0.67  |
| 1.09  | 1.35  | 0.98  |
| 1.03  | -0.51 | 0.35  |
| 1.08  | 1.64  | 0.24  |
| 1.43  | 3.74  | 0.15  |
| -0.70 | 0.80  | -0.53 |
| 0.75  | -0.06 | -0.63 |
| 1.32  | -0.22 | 0.56  |
| 1.58  | -0.55 | -0.46 |
| 0.34  | 0.11  | -0.21 |
| 0.08  | 1.44  | -0.16 |
| -1.54 | -0.43 | -0.56 |
| -0.77 | 0.13  | -0.42 |
| -1.22 | -0.75 | 0.13  |
| -1.15 | -0.32 | -0.29 |
| -1.83 | 1.32  | -0.18 |
| -0.97 | -0.81 | -0.58 |
| -1.33 | 0.04  | -0.77 |
| -1.15 | -0.70 | -0.51 |
| 1.76  | -0.44 | 1.76  |
| -0.12 | 0.15  | -0.11 |
| 0.18  | -0.52 | 1.52  |
| -0.11 | -0.74 | -0.71 |
| 1.86  | -0.06 | 0.51  |
| 1.47  | -0.18 | -0.15 |
| 0.02  | -0.33 | 0.88  |
| 0.53  | -0.57 | -0.54 |
| 2.38  | 0.24  | -0.02 |
| -1.60 | -0.96 | -0.54 |
| 0.37  | 1.14  | 0.07  |
| -0.16 | -0.11 | 2.29  |
| -0.82 | 2.79  | 0.71  |
| -0.38 | 1.44  | 0.19  |

|       |       |       |
|-------|-------|-------|
| -1.13 | -0.08 | 0.65  |
| -0.69 | -0.85 | -0.26 |
| -0.34 | 0.52  | -0.08 |
| 1.80  | -0.08 | 0.22  |
| -0.61 | 1.39  | 1.72  |
| -1.40 | 1.01  | 0.06  |
| -0.30 | -0.64 | 0.29  |
| 0.43  | 0.39  | 0.26  |
| 0.01  | -0.75 | -0.17 |
| 0.19  | -0.15 | 2.06  |
| 0.93  | -0.67 | -0.16 |
| -1.32 | 1.10  | 2.43  |
| 0.88  | -0.52 | -0.29 |
| 0.24  | 0.92  | -0.09 |
| -1.12 | -0.43 | 0.15  |
| -0.76 | -0.26 | -0.39 |
| 1     | -2    | 1     |
| 0.00  | 0.00  | 0.00  |
| 1.00  | 1.00  | 1.00  |
| 0.39  | 0.93  | 0.11  |

| 122                    | 123                   | 124                    |
|------------------------|-----------------------|------------------------|
| TAACAGTCTACAGCCATGGTGC | AATATAACACAGATGGCCTGT | AAAGTTCTGAGACACTCCGACT |
| miR-132-3p             | miR-410               | miR-148a-5p            |
| 15261                  | 14130                 | 13673                  |
| 0.91                   | 0.77                  | -0.12                  |
| -2.06                  | -0.96                 | -0.50                  |
| -0.75                  | 0.09                  | 0.06                   |
| 0.24                   | -0.66                 | -0.29                  |
| -0.87                  | -0.96                 | -0.34                  |
| 0.62                   | -0.67                 | -0.69                  |
| 1.64                   | -0.07                 | -0.70                  |
| 0.91                   | -0.71                 | -0.69                  |
| -0.97                  | -0.04                 | -0.55                  |
| 0.27                   | -0.68                 | -0.82                  |
| -0.59                  | -0.08                 | 0.11                   |
| 0.78                   | -0.85                 | -0.40                  |
| 1.88                   | -0.71                 | 2.24                   |
| 1.28                   | -0.50                 | -0.41                  |
| -0.47                  | 0.58                  | 0.05                   |
| 0.46                   | 0.61                  | 0.89                   |
| 0.45                   | 0.27                  | -0.01                  |
| 0.38                   | 2.22                  | -0.97                  |
| 0.22                   | 0.14                  | 3.48                   |
| -0.57                  | -0.37                 | 1.35                   |
| 0.09                   | -0.82                 | -0.66                  |
| 0.35                   | 1.00                  | 0.65                   |
| -0.24                  | -0.05                 | 0.22                   |
| 0.31                   | -0.49                 | -0.49                  |
| -2.06                  | -0.77                 | -0.73                  |
| -0.72                  | 0.29                  | -0.65                  |
| -1.52                  | 3.42                  | -0.04                  |
| -1.24                  | 1.28                  | 0.44                   |

|       |       |       |
|-------|-------|-------|
| -0.10 | 0.84  | 1.50  |
| -0.31 | -0.09 | 0.91  |
| -0.99 | -0.54 | -0.69 |
| -0.63 | 0.10  | 2.19  |
| -1.63 | -0.79 | -0.47 |
| 1.49  | -0.09 | -0.25 |
| 1.57  | -0.62 | -0.22 |
| 1.30  | -0.81 | -0.20 |
| -0.96 | -0.84 | -1.10 |
| -0.46 | 1.01  | 0.74  |
| 0.79  | 0.14  | 1.94  |
| 0.57  | -0.47 | 0.65  |
| -1.57 | -0.81 | -0.58 |
| -1.17 | -0.96 | 0.34  |
| 0.33  | -0.39 | -0.56 |
| 0.76  | -0.53 | 1.53  |
| 1.00  | -0.12 | 0.69  |
| -1.55 | -0.72 | -1.02 |
| -0.04 | 1.33  | 0.67  |
| 1.09  | 1.35  | 0.98  |
| 1.03  | -0.51 | 0.35  |
| 1.08  | 1.64  | 0.24  |
| 1.43  | 3.74  | 0.15  |
| -0.70 | 0.80  | -0.53 |
| 0.75  | -0.06 | -0.63 |
| 1.32  | -0.22 | 0.56  |
| 1.58  | -0.55 | -0.46 |
| 0.34  | 0.11  | -0.21 |
| 0.08  | 1.44  | -0.16 |
| -1.54 | -0.43 | -0.56 |
| -0.77 | 0.13  | -0.42 |
| -1.22 | -0.75 | 0.13  |
| -1.15 | -0.32 | -0.29 |
| -1.83 | 1.32  | -0.18 |
| -0.97 | -0.81 | -0.58 |
| -1.33 | 0.04  | -0.77 |
| -1.15 | -0.70 | -0.51 |
| 1.76  | -0.44 | 1.76  |
| -0.12 | 0.15  | -0.11 |
| 0.18  | -0.52 | 1.52  |
| -0.11 | -0.74 | -0.71 |
| 1.86  | -0.06 | 0.51  |
| 1.47  | -0.18 | -0.15 |
| 0.02  | -0.33 | 0.88  |
| 0.53  | -0.57 | -0.54 |
| 2.38  | 0.24  | -0.02 |
| -1.60 | -0.96 | -0.54 |
| 0.37  | 1.14  | 0.07  |
| -0.16 | -0.11 | 2.29  |
| -0.82 | 2.79  | 0.71  |
| -0.38 | 1.44  | 0.19  |
| -1.13 | -0.08 | 0.65  |
| -0.69 | -0.85 | -0.26 |
| -0.34 | 0.52  | -0.08 |
| 1.80  | -0.08 | 0.22  |
| -0.61 | 1.39  | 1.72  |
| -1.40 | 1.01  | 0.06  |
| -0.30 | -0.64 | 0.29  |
| 0.43  | 0.39  | 0.26  |

|       |       |       |
|-------|-------|-------|
| 0.01  | -0.75 | -0.17 |
| 0.19  | -0.15 | 2.06  |
| 0.93  | -0.67 | -0.16 |
| -1.32 | 1.10  | 2.43  |
| 0.88  | -0.52 | -0.29 |
| 0.24  | 0.92  | -0.09 |
| -1.12 | -0.43 | 0.15  |
| -1    | 0     | 0     |

---

|                        |                         |                       |
|------------------------|-------------------------|-----------------------|
| 122                    | 123                     | 124                   |
| 36                     | 136                     | 55                    |
| TAGCAGCACATCATGGTTTACA | AACATTCATTGTTGTCGGTGGGT | CAACACCAGTCGATGGGCTGT |
| miR-15b-5p             | miR-181d                | miR-21-3p             |
| 436288                 | 10591                   | 137573                |
| -0.31                  | -0.30                   | 0.08                  |
| 0.05                   | -2.01                   | -1.38                 |
| 0.45                   | -1.01                   | -0.98                 |
| -0.12                  | -1.41                   | -0.29                 |
| 4.79                   | 0.11                    | -1.36                 |
| -0.37                  | 1.20                    | 0.30                  |
| -0.45                  | 2.09                    | 0.40                  |
| -0.20                  | -0.45                   | -1.03                 |
| -0.18                  | -1.03                   | -0.83                 |
| 0.44                   | 0.06                    | -0.82                 |
| -0.43                  | 0.61                    | 0.16                  |
| -0.72                  | -0.61                   | -0.39                 |
| -0.30                  | 1.09                    | 0.73                  |
| -0.14                  | -0.26                   | -0.89                 |
| -0.12                  | 0.37                    | 0.25                  |
| -0.34                  | 1.71                    | 0.74                  |
| 0.06                   | -0.03                   | 2.00                  |
| -0.04                  | -0.15                   | -0.26                 |
| -0.26                  | 0.60                    | 0.37                  |
| -0.52                  | -0.52                   | 1.61                  |
| -0.52                  | 0.10                    | -0.83                 |
| -0.48                  | 0.32                    | 0.55                  |
| -0.27                  | 0.17                    | 0.90                  |
| -0.19                  | -0.18                   | 0.46                  |
| 0.47                   | -1.77                   | -1.37                 |
| -0.03                  | 1.62                    | -0.46                 |
| -0.27                  | -0.34                   | 2.35                  |
| -0.56                  | -0.93                   | 0.80                  |
| -0.57                  | -0.84                   | 1.52                  |
| -0.34                  | -0.68                   | -1.07                 |
| 0.53                   | -1.24                   | -1.37                 |
| -0.24                  | -0.22                   | -1.37                 |
| 4.82                   | -0.78                   | -1.34                 |
| 0.13                   | 0.36                    | 1.20                  |
| 1.63                   | 1.97                    | -0.49                 |
| -0.44                  | 0.06                    | -0.04                 |
| -0.40                  | -1.54                   | -1.18                 |
| -0.40                  | 1.42                    | 0.41                  |
| -0.17                  | 3.90                    | -0.19                 |

|       |       |       |
|-------|-------|-------|
| -0.38 | 0.55  | -0.31 |
| -0.27 | 0.53  | 3.05  |
| -0.68 | 7.55  | 5.66  |
| -0.18 | 1.04  | 0.15  |
| 0.02  | 1.99  | 1.96  |
| -0.60 | -0.13 | -0.83 |
| -0.40 | -0.09 | 2.24  |
| -0.28 | 1.16  | 1.52  |
| -0.39 | 0.47  | 1.39  |
| -0.31 | -0.52 | -0.50 |
| -0.46 | 0.01  | 1.24  |
| -0.46 | -0.03 | -0.07 |
| -0.34 | 0.94  | 0.61  |
| 0.03  | -0.12 | -0.17 |
| -0.09 | 1.11  | -0.09 |
| -0.61 | -0.29 | -0.39 |
| -0.01 | -0.41 | 0.16  |
| -0.31 | -0.11 | -0.39 |
| -0.56 | 0.22  | 1.09  |
| -0.19 | 0.17  | -1.19 |
| 0.11  | 0.76  | -1.32 |
| 0.83  | 0.10  | -1.36 |
| -0.36 | -0.88 | 0.74  |
| 0.21  | -0.99 | -0.17 |
| -0.30 | -1.26 | 1.03  |
| -0.25 | -0.81 | 1.13  |
| -0.55 | 1.10  | -0.44 |
| -0.20 | -1.15 | -0.44 |
| 0.56  | -2.01 | -1.38 |
| 2.96  | -0.96 | -1.36 |
| 0.29  | 0.96  | -1.30 |
| -0.33 | -0.43 | -0.49 |
| -0.65 | -1.87 | -1.00 |
| -0.22 | -0.68 | -0.77 |
| -0.30 | -0.02 | -0.90 |
| -0.72 | 2.86  | -0.43 |
| -0.54 | 0.80  | -0.25 |
| -0.30 | 0.99  | -0.60 |
| -0.63 | -0.24 | -0.99 |
| -0.12 | 0.97  | 2.80  |
| -0.34 | 0.70  | 1.46  |
| 0.13  | -0.37 | -0.38 |
| -0.24 | 0.20  | -0.89 |
| -0.65 | -0.06 | 0.01  |
| -0.52 | 0.33  | 1.27  |
| -0.52 | -1.15 | 2.29  |
| -0.47 | 0.29  | 0.03  |
| -0.43 | 0.51  | 1.07  |
| -0.08 | -0.55 | -0.17 |
| -0.53 | 0.42  | 0.79  |
| -0.26 | 0.01  | -0.66 |
| -0.56 | 0.57  | 0.03  |
| -0.60 | 0.00  | -0.46 |
| -0.26 | 0.19  | 1.95  |
| -0.27 | 0.01  | 0.30  |
| 0.01  | 2.46  | 0.51  |
| 1.50  | 1.61  | 1.69  |
| 0.85  | 0.69  | 1.00  |













































































































































































relabeling+reselection of 29s

Extended trials start at MA1.

| PvUC ttest                    | NPvP ttest | NPvUC ttest |
|-------------------------------|------------|-------------|
| relabeling+reselection of 29s |            |             |
| PvUC ttest                    | NPvP ttest | NPvUC ttest |
| 3.80E-02                      | 5.54E-01   | 1.37E-01    |
| 5.23E-01                      | 5.53E-01   | 9.65E-01    |
| 2.38E-01                      | 1.64E-01   | 6.95E-01    |

random relabeling, random

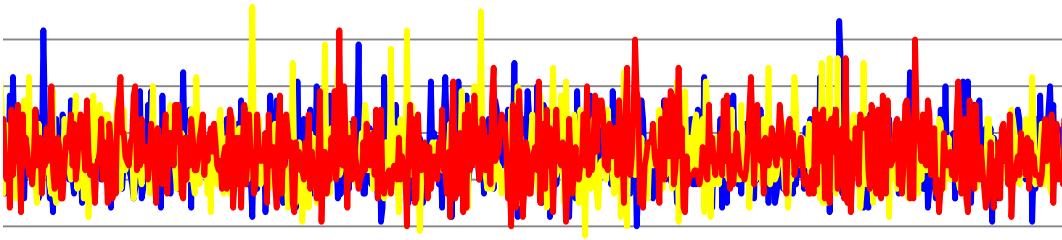





























































| 24                     | 25                     | 26                    |
|------------------------|------------------------|-----------------------|
| CAAAGAATTCTCCTTTTGGGCT | CACTAGATTGTGAGCTCCTGGA | ACTGGACTTGGAGTCAGAAGG |
| miR-186-5p             | miR-28-3p              | miR-378a-3p           |
| 979581                 | 903691                 | 738230                |
| 0.19                   | 0.27                   | 0.18                  |
| 0.18                   | 0.55                   | 0.06                  |
| 0.26                   | 0.20                   | 0.12                  |
| 0.11                   | 0.15                   | 0.12                  |
| 0.13                   | 0.17                   | 0.20                  |
| 0.07                   | 0.25                   | 0.12                  |
| 0.06                   | 0.25                   | 0.20                  |
| 0.08                   | 0.13                   | 0.14                  |
| 0.16                   | 0.14                   | 0.10                  |
| 0.24                   | 0.21                   | 0.12                  |
| 0.34                   | 0.34                   | 0.11                  |
| 0.09                   | 0.15                   | 0.15                  |
| 0.47                   | 0.20                   | 0.29                  |
| 0.08                   | 0.13                   | 0.13                  |
| 0.23                   | 0.21                   | 0.24                  |
| 0.39                   | 0.23                   | 0.14                  |
| 0.15                   | 0.23                   | 0.27                  |
| 0.13                   | 0.16                   | 0.22                  |
| 0.27                   | 0.52                   | 0.21                  |
| 0.30                   | 0.19                   | 0.18                  |
| 0.09                   | 0.23                   | 0.12                  |
| 0.10                   | 0.25                   | 0.22                  |
| 0.11                   | 0.23                   | 0.23                  |
| 0.06                   | 0.16                   | 0.15                  |
| 0.08                   | 0.24                   | 0.06                  |
| 0.18                   | 0.23                   | 0.11                  |
| 0.35                   | 0.19                   | 0.07                  |
| 0.44                   | 0.16                   | 0.07                  |
| 0.33                   | 0.87                   | 0.12                  |
| 0.17                   | 0.55                   | 0.13                  |
| 0.07                   | 0.32                   | 0.10                  |
| 0.33                   | 1.01                   | 0.14                  |
| 0.22                   | 0.10                   | 0.15                  |
| 0.11                   | 0.25                   | 0.17                  |
| 0.14                   | 0.17                   | 0.17                  |
| 0.17                   | 0.27                   | 0.22                  |
| 0.02                   | 0.04                   | 0.04                  |
| 0.20                   | 0.36                   | 0.22                  |
| 0.44                   | 0.30                   | 0.26                  |
| 0.21                   | 0.24                   | 0.26                  |
| 0.03                   | 0.31                   | 0.29                  |
| 0.02                   | 0.31                   | 0.72                  |
| 0.12                   | 0.23                   | 0.10                  |
| 0.33                   | 0.39                   | 0.20                  |
| 0.12                   | 0.29                   | 0.14                  |
| 0.02                   | 0.19                   | 0.11                  |
| 0.36                   | 0.26                   | 0.19                  |
| 0.13                   | 0.32                   | 0.21                  |
| 0.23                   | 0.13                   | 0.12                  |
| 0.17                   | 0.20                   | 0.23                  |

|      |      |      |
|------|------|------|
| 0.23 | 0.18 | 0.15 |
| 0.10 | 0.25 | 0.17 |
| 0.07 | 0.16 | 0.13 |
| 0.21 | 0.20 | 0.20 |
| 0.09 | 0.19 | 0.11 |
| 0.10 | 0.24 | 0.19 |
| 0.15 | 0.14 | 0.12 |
| 0.53 | 0.16 | 0.10 |
| 0.21 | 0.33 | 0.17 |
| 0.31 | 0.30 | 0.16 |
| 0.30 | 0.24 | 0.12 |
| 0.59 | 0.15 | 0.08 |
| 0.10 | 0.13 | 0.10 |
| 0.19 | 0.15 | 0.10 |
| 0.25 | 0.15 | 0.09 |
| 0.11 | 0.21 | 0.14 |
| 0.42 | 0.18 | 0.11 |
| 0.15 | 0.94 | 0.18 |
| 0.11 | 0.12 | 0.14 |
| 0.30 | 0.24 | 0.21 |
| 0.12 | 0.20 | 0.10 |
| 0.21 | 0.37 | 0.13 |
| 0.19 | 0.12 | 0.16 |
| 0.30 | 0.16 | 0.20 |
| 0.02 | 0.16 | 0.52 |
| 0.22 | 0.15 | 0.16 |
| 0.20 | 0.48 | 0.23 |
| 0.16 | 0.55 | 0.13 |
| 0.30 | 0.16 | 0.26 |
| 0.31 | 0.25 | 0.21 |
| 0.12 | 0.17 | 0.10 |
| 0.20 | 0.25 | 0.18 |
| 0.10 | 0.16 | 0.13 |
| 0.33 | 0.22 | 0.23 |
| 0.28 | 0.11 | 0.16 |
| 0.23 | 0.22 | 0.15 |
| 0.21 | 0.22 | 0.18 |
| 0.15 | 0.16 | 0.11 |
| 0.32 | 0.32 | 0.28 |
| 0.19 | 0.20 | 0.16 |
| 0.20 | 0.14 | 0.21 |
| 0.09 | 0.24 | 0.19 |
| 0.12 | 0.21 | 0.25 |
| 0.25 | 0.27 | 0.09 |
| 0.47 | 0.24 | 0.10 |
| 0.00 | 0.00 | 0.00 |
| 0.00 | 0.00 | 0.00 |
| 0.00 | 0.00 | 0.00 |







25

26

27

---

**G\_33**

**G\_34**

**G\_8**

---

|       |       |       |
|-------|-------|-------|
| 0.22  |       |       |
| -0.19 | -0.10 |       |
| -0.17 | -0.25 | 0.59  |
| -0.07 | -0.06 | 0.25  |
| -0.13 | -0.28 | 0.23  |
| 0.27  | -0.23 | -0.05 |
| 0.04  | -0.14 | 0.33  |
| 0.43  | 0.04  | 0.10  |
| -0.01 | -0.04 | -0.33 |
| 0.01  | 0.16  | -0.23 |
| -0.06 | 0.27  | -0.45 |
| 0.03  | -0.33 | -0.22 |
| -0.38 | 0.06  | 0.10  |
| -0.33 | 0.05  | 0.30  |
| -0.11 | 0.37  | -0.36 |
| 0.09  | 0.21  | -0.30 |
| 0.03  | 0.23  | -0.24 |
| 0.12  | 0.41  | -0.31 |
| -0.32 | -0.07 | 0.26  |
| 0.05  | 0.02  | -0.41 |
| 0.11  | 0.16  | -0.35 |
| -0.09 | 0.27  | 0.21  |
| -0.11 | 0.18  | -0.33 |
| -0.30 | -0.16 | 0.00  |
| -0.31 | 0.23  | -0.18 |
| -0.30 | 0.11  | 0.20  |
| 0.20  | 0.32  | -0.09 |
| 0.25  | 0.06  | -0.04 |
| -0.07 | 0.30  | -0.10 |
| -0.03 | -0.16 | -0.35 |

|       |       |       |
|-------|-------|-------|
| 0.21  | 0.24  | -0.08 |
| 0.02  | 0.04  | 0.18  |
| -0.20 | -0.14 | 0.57  |
| 0.27  | 0.64  | -0.38 |
| 0.22  | 0.45  | -0.06 |
| 0.30  | 0.46  | -0.03 |
| -0.20 | -0.22 | 0.70  |
| 0.08  | 0.12  | 0.03  |
| 0.07  | 0.20  | 0.29  |
| -0.14 | -0.05 | 0.59  |
| -0.30 | -0.27 | -0.06 |
| -0.32 | -0.20 | 0.53  |
| 0.20  | -0.09 | -0.01 |
| 0.19  | -0.07 | -0.19 |
| -0.02 | 0.09  | -0.10 |
| -0.23 | -0.27 | -0.12 |
| -0.22 | -0.28 | 0.19  |
| -0.35 | -0.42 | 0.32  |
| -0.33 | -0.13 | 0.14  |
| 0.10  | 0.20  | -0.28 |
| -0.36 | -0.08 | 0.26  |
| -0.11 | 0.09  | 0.15  |
| 0.07  | -0.13 | 0.12  |
| -0.26 | 0.07  | 0.54  |
| -0.10 | 0.17  | 0.41  |
| 0.20  | 0.16  | 0.00  |
| 0.00  | 0.34  | 0.14  |
| -0.18 | 0.10  | -0.36 |
| -0.28 | -0.13 | 0.42  |
| -0.19 | -0.25 | 0.50  |
| -0.13 | 0.22  | -0.09 |
| -0.24 | 0.32  | 0.05  |
| -0.13 | 0.13  | -0.01 |
| -0.42 | -0.20 | 0.30  |
| -0.05 | 0.28  | -0.13 |
| -0.14 | -0.18 | 0.37  |
| -0.18 | -0.10 | -0.14 |
| 0.05  | 0.19  | -0.34 |
| -0.03 | 0.09  | 0.57  |
| -0.21 | 0.27  | 0.38  |

| 23                     | 24                   | 25                     |
|------------------------|----------------------|------------------------|
| 125                    | 126                  | 127                    |
| TGTAGTGTTCCTACTTTATGGA | ACTCTTCCCTGTTGCACTAC | CTGCCCTGGCCCGAGGGACCGA |
| miR-142-3p             | miR-130b-5p          | miR-874                |
| 13338                  | 12970                | 12358                  |
| -0.37                  | 0.32                 | 0.68                   |
| -0.39                  | -0.98                | -1.39                  |
| -0.34                  | -0.91                | -0.16                  |
| -0.35                  | -0.74                | -0.78                  |
| -0.22                  | 2.95                 | 1.98                   |
| -0.33                  | 2.28                 | -0.77                  |
| -0.29                  | 0.25                 | -0.91                  |
| -0.34                  | 0.67                 | -0.85                  |
| -0.37                  | -0.85                | -0.79                  |
| -0.34                  | -0.46                | 0.19                   |
| -0.33                  | -1.02                | 0.94                   |
| -0.32                  | 0.63                 | -0.80                  |
| 1.68                   | 0.71                 | -0.77                  |
| -0.37                  | -0.38                | -0.77                  |
| -0.23                  | -0.87                | -0.44                  |
| 0.41                   | 0.33                 | 0.01                   |
| -0.30                  | -0.35                | 1.84                   |
| -0.30                  | -0.63                | 0.33                   |
| -0.27                  | -0.86                | -0.36                  |
| 4.54                   | -0.56                | -0.49                  |

|       |       |       |
|-------|-------|-------|
| -0.27 | -0.09 | -0.30 |
| -0.35 | 0.59  | -0.16 |
| -0.27 | 1.14  | 0.00  |
| -0.30 | 0.00  | 0.26  |
| -0.39 | 0.67  | 1.29  |
| 0.04  | -0.92 | 2.72  |
| 0.34  | -0.89 | -0.50 |
| 4.34  | -1.01 | -0.59 |
| -0.23 | -0.43 | -0.11 |
| -0.36 | -1.36 | -0.55 |
| -0.39 | -0.91 | -0.96 |
| -0.39 | -1.03 | -0.52 |
| -0.39 | -0.14 | -0.69 |
| -0.24 | -0.47 | -1.11 |
| -0.27 | -0.51 | -1.04 |
| -0.05 | -0.47 | 0.13  |
| -0.34 | -0.88 | -1.09 |
| -0.15 | -0.06 | -0.85 |
| 0.22  | -0.59 | 0.08  |
| -0.23 | -0.26 | 0.20  |
| 0.27  | 0.28  | 7.67  |
| 1.00  | 3.76  | 54.32 |
| -0.18 | 0.09  | 1.01  |
| 0.29  | -0.16 | -0.42 |
| -0.20 | -0.12 | -0.49 |
| -0.24 | 0.05  | 7.11  |
| 0.02  | -0.74 | 0.78  |
| -0.18 | 0.28  | -0.31 |
| -0.18 | 0.20  | -0.56 |
| -0.20 | 0.02  | 0.22  |
| -0.06 | -0.70 | -0.34 |
| -0.24 | 0.05  | 0.91  |
| -0.32 | 0.25  | -0.39 |
| -0.06 | 0.75  | 0.68  |
| -0.33 | 1.40  | -0.71 |
| -0.29 | -0.63 | 1.78  |
| -0.25 | -0.12 | 0.11  |
| 11.42 | -1.02 | -0.37 |
| -0.30 | -0.35 | 0.49  |
| -0.15 | 1.20  | 0.33  |
| -0.19 | 0.50  | 0.96  |
| 5.97  | -1.07 | -0.66 |
| -0.23 | -0.71 | 0.10  |
| -0.18 | 0.21  | 0.27  |
| -0.24 | -1.06 | -0.01 |
| -0.37 | -1.13 | -1.20 |
| -0.34 | -1.09 | 0.20  |
| -0.39 | -0.61 | -0.18 |
| -0.36 | 1.45  | -0.47 |
| -0.33 | 1.66  | -0.17 |
| -0.28 | -0.12 | -0.85 |
| -0.25 | -0.88 | -0.88 |
| -0.27 | -0.39 | -0.80 |
| -0.07 | -0.34 | -0.95 |
| -0.12 | 0.58  | 59.63 |
| 0.01  | -0.26 | -0.73 |
| -0.29 | -1.17 | -0.26 |
| -0.21 | -0.90 | -0.64 |
| -0.04 | -1.14 | 0.73  |

|       |       |       |
|-------|-------|-------|
| -0.20 | -0.68 | 0.31  |
| -0.34 | -0.53 | 1.25  |
| -0.17 | -0.58 | 1.07  |
| -0.18 | 0.51  | -0.28 |
| 6.52  | -0.62 | -0.02 |
| 6.10  | -1.18 | -0.89 |
| -0.18 | -0.69 | 0.70  |
| -0.22 | -0.66 | 0.61  |
| -0.22 | -0.46 | 0.55  |
| -0.16 | -0.73 | -0.80 |
| -0.20 | 0.01  | 0.26  |
| -0.25 | -0.56 | -0.45 |
| -0.31 | -0.60 | -0.75 |
| -0.14 | 0.77  | 0.21  |
| -0.35 | -1.06 | -0.17 |
| -0.39 | -0.96 | 1.86  |
| 0     | 0     | 0     |
| 0.00  | 0.00  | 0.00  |
| 1.00  | 1.00  | 1.00  |
| 0.66  | 0.23  | 0.94  |

| 125                    | 126                  | 127                   |
|------------------------|----------------------|-----------------------|
| TGTAGTGTTCCTACTTTATGGA | ACTCTTCCCTGTTGCACTAC | CTGCCCTGGCCCAGGGACCGA |
| miR-142-3p             | miR-130b-5p          | miR-874               |
| 13338                  | 12970                | 12358                 |
| -0.37                  | 0.32                 | 0.68                  |
| -0.39                  | -0.98                | -1.39                 |
| -0.34                  | -0.91                | -0.16                 |
| -0.35                  | -0.74                | -0.78                 |
| -0.22                  | 2.95                 | 1.98                  |
| -0.33                  | 2.28                 | -0.77                 |
| -0.29                  | 0.25                 | -0.91                 |
| -0.34                  | 0.67                 | -0.85                 |
| -0.37                  | -0.85                | -0.79                 |
| -0.34                  | -0.46                | 0.19                  |
| -0.33                  | -1.02                | 0.94                  |
| -0.32                  | 0.63                 | -0.80                 |
| 1.68                   | 0.71                 | -0.77                 |
| -0.37                  | -0.38                | -0.77                 |
| -0.23                  | -0.87                | -0.44                 |
| 0.41                   | 0.33                 | 0.01                  |
| -0.30                  | -0.35                | 1.84                  |
| -0.30                  | -0.63                | 0.33                  |
| -0.27                  | -0.86                | -0.36                 |
| 4.54                   | -0.56                | -0.49                 |
| -0.27                  | -0.09                | -0.30                 |
| -0.35                  | 0.59                 | -0.16                 |
| -0.27                  | 1.14                 | 0.00                  |
| -0.30                  | 0.00                 | 0.26                  |
| -0.39                  | 0.67                 | 1.29                  |
| 0.04                   | -0.92                | 2.72                  |
| 0.34                   | -0.89                | -0.50                 |
| 4.34                   | -1.01                | -0.59                 |

|       |       |       |
|-------|-------|-------|
| -0.23 | -0.43 | -0.11 |
| -0.36 | -1.36 | -0.55 |
| -0.39 | -0.91 | -0.96 |
| -0.39 | -1.03 | -0.52 |
| -0.39 | -0.14 | -0.69 |
| -0.24 | -0.47 | -1.11 |
| -0.27 | -0.51 | -1.04 |
| -0.05 | -0.47 | 0.13  |
| -0.34 | -0.88 | -1.09 |
| -0.15 | -0.06 | -0.85 |
| 0.22  | -0.59 | 0.08  |
| -0.23 | -0.26 | 0.20  |
| 0.27  | 0.28  | 7.67  |
| 1.00  | 3.76  | 54.32 |
| -0.18 | 0.09  | 1.01  |
| 0.29  | -0.16 | -0.42 |
| -0.20 | -0.12 | -0.49 |
| -0.24 | 0.05  | 7.11  |
| 0.02  | -0.74 | 0.78  |
| -0.18 | 0.28  | -0.31 |
| -0.18 | 0.20  | -0.56 |
| -0.20 | 0.02  | 0.22  |
| -0.06 | -0.70 | -0.34 |
| -0.24 | 0.05  | 0.91  |
| -0.32 | 0.25  | -0.39 |
| -0.06 | 0.75  | 0.68  |
| -0.33 | 1.40  | -0.71 |
| -0.29 | -0.63 | 1.78  |
| -0.25 | -0.12 | 0.11  |
| 11.42 | -1.02 | -0.37 |
| -0.30 | -0.35 | 0.49  |
| -0.15 | 1.20  | 0.33  |
| -0.19 | 0.50  | 0.96  |
| 5.97  | -1.07 | -0.66 |
| -0.23 | -0.71 | 0.10  |
| -0.18 | 0.21  | 0.27  |
| -0.24 | -1.06 | -0.01 |
| -0.37 | -1.13 | -1.20 |
| -0.34 | -1.09 | 0.20  |
| -0.39 | -0.61 | -0.18 |
| -0.36 | 1.45  | -0.47 |
| -0.33 | 1.66  | -0.17 |
| -0.28 | -0.12 | -0.85 |
| -0.25 | -0.88 | -0.88 |
| -0.27 | -0.39 | -0.80 |
| -0.07 | -0.34 | -0.95 |
| -0.12 | 0.58  | 59.63 |
| 0.01  | -0.26 | -0.73 |
| -0.29 | -1.17 | -0.26 |
| -0.21 | -0.90 | -0.64 |
| -0.04 | -1.14 | 0.73  |
| -0.20 | -0.68 | 0.31  |
| -0.34 | -0.53 | 1.25  |
| -0.17 | -0.58 | 1.07  |
| -0.18 | 0.51  | -0.28 |
| 6.52  | -0.62 | -0.02 |
| 6.10  | -1.18 | -0.89 |
| -0.18 | -0.69 | 0.70  |
| -0.22 | -0.66 | 0.61  |



|       |       |       |
|-------|-------|-------|
| -0.22 | -0.46 | 0.55  |
| -0.16 | -0.73 | -0.80 |
| -0.20 | 0.01  | 0.26  |
| -0.25 | -0.56 | -0.45 |
| -0.31 | -0.60 | -0.75 |
| -0.14 | 0.77  | 0.21  |
| -0.35 | -1.06 | -0.17 |
| 0     | -1    | 2     |

---

|                         |                        |                       |
|-------------------------|------------------------|-----------------------|
| 125                     | 126                    | 127                   |
| 120                     | 16                     | 89                    |
| TATTCATTTATCCCCAGCCTACA | AGCTCGGTCTGAGGCCCTCAGT | TCACAGTGAACCGGTCTCTTT |
| miR-664a-3p             | miR-423-3p             | miR-128               |
| 15369                   | 1093922                | 40544                 |
| 0.57                    | 0.03                   | 0.18                  |
| -0.33                   | -1.22                  | 0.71                  |
| -0.35                   | -0.87                  | -0.79                 |
| -0.58                   | -0.64                  | -0.96                 |
| 4.31                    | -1.06                  | 1.38                  |
| -0.83                   | 1.52                   | 1.46                  |
| -0.68                   | 2.37                   | 1.06                  |
| -0.16                   | 0.36                   | -0.86                 |
| -0.48                   | -0.53                  | 0.03                  |
| 0.04                    | -0.77                  | 0.05                  |
| 0.21                    | -0.54                  | 0.73                  |
| -0.78                   | 1.58                   | -0.47                 |
| 0.02                    | -0.34                  | 2.44                  |
| 0.37                    | 0.20                   | -1.60                 |
| 0.00                    | -0.42                  | -0.26                 |
| -0.01                   | 0.34                   | 0.86                  |
| 0.15                    | -0.08                  | -1.35                 |
| -0.47                   | 0.02                   | 0.75                  |
| 0.61                    | -1.01                  | -0.40                 |
| -0.51                   | -0.13                  | 1.19                  |
| -0.84                   | -0.06                  | 0.27                  |
| -0.60                   | 1.71                   | -0.57                 |
| -0.39                   | 1.01                   | -0.86                 |
| -0.71                   | 1.46                   | -1.29                 |
| 0.89                    | -1.06                  | -0.21                 |
| 0.90                    | -0.90                  | -0.85                 |
| -0.34                   | -0.98                  | -0.65                 |
| -0.48                   | -0.88                  | -0.52                 |
| -0.49                   | -0.80                  | 3.16                  |
| -0.51                   | -1.13                  | 0.02                  |
| -0.80                   | -1.15                  | -0.98                 |
| -0.48                   | -1.23                  | 0.49                  |
| 4.67                    | -1.14                  | 3.52                  |
| 1.13                    | 1.15                   | 1.36                  |
| 2.86                    | -0.63                  | -0.44                 |
| 0.33                    | 0.59                   | 1.67                  |
| -1.03                   | 0.71                   | -1.78                 |
| 0.00                    | -0.86                  | -0.25                 |
| 2.22                    | -0.90                  | 0.02                  |

|       |       |       |
|-------|-------|-------|
| 1.44  | -0.42 | -0.08 |
| -0.99 | 0.49  | -1.41 |
| -1.00 | 2.47  | -0.04 |
| -0.36 | 0.55  | -1.18 |
| 0.22  | -0.32 | 0.65  |
| 0.08  | -0.34 | -0.99 |
| -1.02 | 1.32  | -1.96 |
| -0.38 | -0.19 | 2.40  |
| -0.62 | 0.98  | 1.10  |
| -0.40 | 0.58  | 0.90  |
| -0.59 | 0.57  | 0.96  |
| -0.53 | -0.12 | 1.05  |
| -0.50 | 0.32  | -0.14 |
| -0.51 | -0.20 | -0.73 |
| -0.14 | 0.43  | 1.81  |
| -0.96 | 0.59  | 1.22  |
| -0.77 | -0.53 | -0.88 |
| -0.74 | -0.12 | 0.34  |
| -0.28 | -0.98 | -0.14 |
| -0.22 | -0.60 | 0.66  |
| 0.57  | -0.93 | 2.90  |
| 1.88  | -1.05 | 2.68  |
| -0.91 | -1.00 | -0.29 |
| -0.64 | -0.46 | -1.03 |
| -0.39 | -0.19 | -0.86 |
| -0.66 | -0.88 | -0.26 |
| -0.53 | 0.38  | -0.98 |
| 0.23  | -0.97 | 1.01  |
| 0.15  | -1.25 | -0.60 |
| 1.22  | -0.76 | 0.88  |
| 0.67  | -0.70 | 3.09  |
| -0.68 | -0.12 | -0.42 |
| -0.90 | -1.16 | 4.46  |
| -0.34 | -0.39 | -0.07 |
| 0.82  | -0.22 | 1.06  |
| -0.85 | 2.03  | -2.12 |
| -0.63 | 0.50  | 1.03  |
| 0.14  | -1.14 | -0.87 |
| -0.72 | -1.03 | -1.01 |
| 0.47  | -0.80 | 0.18  |
| -0.29 | -0.51 | 0.63  |
| -0.45 | -0.34 | -1.25 |
| -0.54 | -0.36 | 0.88  |
| -0.83 | 1.88  | -0.24 |
| 0.57  | -0.29 | 1.18  |
| -0.98 | -0.87 | 0.04  |
| -0.23 | -0.04 | 0.97  |
| -0.57 | 0.02  | 1.15  |
| -0.55 | 0.00  | 0.39  |
| -0.59 | -0.77 | 1.95  |
| -0.39 | -0.15 | 1.45  |
| -0.93 | -0.34 | 0.21  |
| -0.94 | -0.57 | -0.20 |
| -0.64 | 1.13  | -0.52 |
| -0.50 | -0.98 | -0.59 |
| 0.75  | -0.86 | -0.09 |
| 1.73  | 1.78  | 1.80  |
| 0.43  | 1.00  | 1.00  |











































































































































































1000 relabeling+reselect.

UC

37

26

25

19

25

34

32

26

30

17

om selections, then count correlations > 0.54140

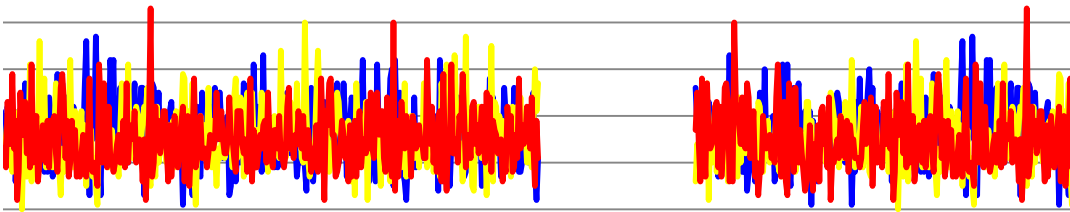

1000 trials

23

27

32

27

35

33

16

23

26

52

34

27

23

16

19

13

23

33

22

25

23

34

27

27

21

20

37

20  
17  
22  
34  
21  
22  
15  
27  
22  
27  
28  
23  
24  
19  
24  
26  
25  
24  
20  
23  
21  
26  
27  
29  
14  
30  
21  
24  
29  
27  
22  
18  
23  
23  
26  
22  
21  
19  
16  
18  
20  
29  
39  
16  
18  
28  
22  
36  
22  
39  
24  
30  
31  
23  
21  
14  
38  
22  
24



29  
29  
17  
24  
26  
24  
25  
18  
29  
29  
43  
25  
25  
25  
35  
14  
32  
34  
22  
29  
22  
23  
23  
24  
23  
29  
23  
26  
23  
26  
21  
32  
26  
20  
22  
32  
21  
33  
22  
22  
20  
23  
28  
26  
32  
23  
37  
19  
22  
32  
19  
35  
20  
12  
28  
32  
18  
22  
27

28  
26  
13  
24  
27  
38  
24  
26  
25  
37  
24  
16  
31  
15  
26  
20  
24  
23  
23  
25  
22  
14  
41  
26  
29  
30  
33  
22  
17  
25  
35  
22  
17  
26  
40  
22  
17  
22  
18  
25  
35  
23  
38  
22  
29  
24  
26  
16  
17  
17  
35  
22  
29  
31  
18  
32  
26  
26  
24

28  
49  
24  
22  
17  
17  
29  
22  
31  
19  
30  
28  
22  
16  
32  
11  
14  
42  
30  
26  
31  
21  
28  
29  
36  
29  
24  
28  
26  
20  
29  
15  
15  
23  
27  
16  
20  
22  
19  
29  
17  
15  
25  
23  
25  
28  
41  
25  
30  
23  
29  
19  
24  
14  
34  
42  
29  
25  
32

12  
25  
23  
21  
41  
22  
20  
38  
26  
38  
19  
22  
30  
24  
32  
33  
24  
20  
26  
24  
17  
31  
32  
33  
32  
24  
18  
37  
35  
27  
26  
25  
23  
31  
31  
35  
28  
26  
29  
45  
23  
12  
28  
17  
33  
19  
25  
39  
34  
32  
26  
22  
22  
40  
20  
21  
15  
36  
28

23  
33  
12  
24  
16  
27  
19  
23  
26  
26  
23  
32  
20  
23  
12  
24  
23  
22  
16  
39  
21  
20  
24  
25  
31  
20  
32  
38  
35  
25  
29  
28  
18  
27  
30  
31  
23  
23  
31  
22  
19  
39  
25  
18  
30  
21  
26  
29  
34  
22  
23  
29  
17  
20  
25  
29  
10  
17  
32

37  
33  
23  
25  
23  
20  
20  
16  
27  
27  
22  
33  
25  
23  
37  
20  
26  
29  
20  
19  
25  
22  
15  
20  
14  
23  
26  
26  
33  
31  
27  
33  
19  
27  
19  
35  
27  
29  
21  
42  
25  
25  
26  
23  
14  
26  
23  
24  
26  
33  
14  
20  
28  
15  
28  
31  
22  
38  
22

21  
19  
30  
17  
28  
21  
32  
28  
27  
27  
27  
16  
28  
20  
27  
35  
28  
23  
29  
27  
15  
30  
23  
27  
15  
17  
20  
28  
25  
18  
26  
28  
21  
28  
27  
17  
24  
19  
28  
21  
21  
27  
18  
31  
20  
24  
33  
21  
31  
24  
30  
21  
42  
19  
27  
29  
28  
25  
13

30  
35  
25  
28  
23  
54  
45  
17  
27  
17  
25  
24  
30  
22  
22  
23  
27  
30  
33  
34  
14  
26  
18  
14  
34  
20  
19  
17  
20  
28  
30  
28  
25  
26  
26  
21  
33  
27  
22  
27  
20  
28  
17  
29  
30  
30  
26  
20  
27  
43  
27  
34  
17  
21  
30  
22  
33  
18



18  
30  
14  
18  
20  
25  
21  
16  
23  
22  
35  
27  
22  
40  
23  
27  
23  
28  
30  
16  
20  
22  
30  
18  
41  
21  
25  
41  
19  
15  
30  
36  
34  
34  
37  
21  
21  
26  
31  
24  
28  
31  
11  
29  
25  
24  
16  
28  
23  
27  
24  
28  
20  
23  
32  
23  
22  
33  
35

33  
24  
26  
26  
20  
30  
29  
30  
11  
23  
18  
33  
23  
38  
24  
25  
24  
28  
35  
40  
28  
36  
22  
28  
31  
23  
30  
24  
32  
24  
25  
25  
30  
16  
24  
31  
19  
25  
31  
37  
29  
25  
28  
22  
26  
20  
19  
30  
31  
28  
20  
18  
29  
18  
34  
31  
17  
24  
28

39  
27  
17  
37  
22  
27  
34  
23  
20  
23  
32  
23  
25  
27  
29  
25  
23  
36  
46  
26  
13  
35  
25  
28  
47  
29  
22  
13  
34  
21  
29  
28  
21  
42  
37  
42  
19  
29  
29  
36  
26  
31  
36  
21  
20  
29  
28  
33  
37  
22  
24  
23  
36  
36  
13  
34  
31  
30  
17

37  
36  
21  
27  
35  
24  
25  
23  
25  
22  
24  
31  
33  
22  
24  
28  
28  
21  
27  
11  
24  
22  
17  
19  
17  
13  
23  
31  
32  
18  
17  
35  
29  
27  
27  
28  
32  
25  
28  
36  
25  
25  
35  
28  
21  
21  
29  
30  
13  
15  
31  
24  
16  
23  
24  
20  
23  
37  
34

19  
21  
21  
23  
41  
28  
32  
28  
32  
18  
43  
21  
24  
26  
22  
23  
20  
19  
24  
19  
22  
23  
28  
21  
23  
35  
35  
22  
23  
30  
25  
17  
21  
22  
20  
31  
19  
14  
29  
35  
36  
16  
22  
23  
22  
29  
29  
29  
33  
20  
26  
29  
26  
28  
22  
34  
37  
20  
28

27  
37  
29  
17  
30  
28  
34  
31  
34  
23  
30  
23  
31  
42  
22  
22  
23  
16  
25  
26  
33  
16  
41  
24  
30  
28  
26  
21  
21  
27  
38  
40  
15  
42  
26  
19  
35  
22  
18  
16  
12  
21  
24  
18  
23  
34  
19  
21  
27  
26  
21  
25  
28  
25  
32  
25  
21  
28  
25

30  
14  
42  
25  
16  
31  
21  
26  
15  
24  
38  
26  
26  
34  
21  
31  
23  
17  
18  
31  
25  
20  
29  
18  
26  
26  
24  
29  
15  
22  
25  
32  
24  
38  
19  
34  
23  
22  
27  
26  
17  
23  
36  
30  
22  
18  
27  
21  
36  
31  
24  
18  
18  
20  
29  
23  
27  
20  
29

20  
35  
18  
12  
21



36  
28  
30  
28  
25  
26  
26  
21  
33  
27  
22  
27  
20  
28  
17  
29

30  
30  
26  
20  
27  
43  
27  
34  
17  
21  
30  
22  
33  
18  
18  
30  
14  
18  
20  
25  
21  
16  
23  
22  
35  
27  
22  
40  
23  
27  
23  
28  
30  
16  
20  
22  
30  
18  
41  
21  
25  
41  
19  
15  
30  
36  
34  
34  
37  
21  
21  
26  
31  
24  
28  
31  
11  
29  
25

24  
16  
28  
23  
27  
24  
28  
20  
23  
32  
23  
22  
33  
35  
33  
24  
26  
26  
20  
30  
29  
30  
11  
23  
18  
33  
23  
38  
24  
25  
24  
28  
35  
40  
28  
36  
22  
28  
31  
23  
30  
24  
32  
24  
25  
25  
30  
16  
24  
31  
19  
25  
31  
37  
29  
25  
28  
22  
26

20  
19  
30  
31  
28  
20  
18  
29  
18  
34  
31  
17  
24  
28  
39  
27  
17  
37  
22  
27  
34  
23  
20  
23  
32  
23  
25  
27  
29  
25  
23  
36  
46  
26  
13  
35  
25  
28  
47  
29  
22  
13  
34  
21  
29  
28  
21  
42  
37  
42  
19  
29  
29  
36  
26  
31  
36  
21  
20

29  
28  
33  
37  
22  
24  
23  
36  
36  
13  
34  
31  
30  
17  
37  
36  
21  
27  
35  
24  
25  
23  
25  
22  
24  
31  
33  
22  
24  
28  
28  
21  
27  
11  
24  
22  
17  
19  
17  
13  
23  
31  
32  
18  
17  
35  
29  
27  
27  
28  
32  
25  
28  
36  
25  
25  
35  
28  
21

21  
29  
30  
13  
15  
31  
24  
16  
23  
24  
20  
23  
37  
34  
19  
21  
21  
23  
41  
28  
32  
28  
32  
18  
43  
21  
24  
26  
22  
23  
20  
19  
24  
19  
22  
23  
28  
21  
23  
35  
35  
22  
23  
30  
25  
17  
21  
22  
20  
31  
19  
14  
29  
35  
36  
16  
22  
23  
22

29  
29  
29  
33  
20  
26  
29  
26  
28  
22  
34  
37  
20  
28  
27  
37  
29  
17  
30  
28  
34  
31  
34  
23  
30  
23  
31  
42  
22  
22  
23  
16  
25  
26  
33  
16  
41  
24  
30  
28  
26  
21  
21  
27  
38  
40  
15  
42  
26  
19  
35  
22  
18  
16  
12  
21  
24  
18  
23

34  
19  
21  
27  
26  
21  
25  
28  
25  
32  
25  
21  
28  
25  
30  
14  
42  
25  
16  
31  
21  
26  
15  
24  
38  
26  
26  
34  
21  
31  
23  
17  
18  
31  
25  
20  
29  
18  
26  
26  
24  
29  
15  
22  
25  
32  
24  
38  
19  
34  
23  
22  
27  
26  
17  
23  
36  
30  
22



18  
27  
21  
36  
31  
24  
18  
18  
20  
29  
23  
27  
20  
29  
20  
35  
18  
12  
21



|                         |                        |                        |
|-------------------------|------------------------|------------------------|
| 27                      | 28                     | 29                     |
| CAAAGTGTGTTTCGTGCAGGTAG | TCAGTGCACTACAGAACTTTGT | TGTCAGTTTGTCAAATACCCCA |
| miR-93-5p               | miR-148a-3p            | miR-223-3p             |
| 679306                  | 664224                 | 624773                 |
| 0.23                    | 0.15                   | 0.10                   |
| 0.07                    | 0.02                   | 0.16                   |
| 0.31                    | 0.07                   | 0.11                   |
| 0.26                    | 0.08                   | 0.07                   |
| 0.09                    | 0.03                   | 0.20                   |
| 0.06                    | 0.21                   | 0.02                   |
| 0.17                    | 0.11                   | 0.02                   |
| 0.10                    | 0.06                   | 0.03                   |
| 0.14                    | 0.05                   | 0.04                   |
| 0.17                    | 0.06                   | 0.06                   |
| 0.09                    | 0.13                   | 0.28                   |
| 0.08                    | 0.06                   | 0.02                   |
| 0.21                    | 0.33                   | 0.20                   |
| 0.13                    | 0.03                   | 0.04                   |
| 0.23                    | 0.10                   | 0.08                   |
| 0.15                    | 0.17                   | 0.15                   |
| 0.17                    | 0.08                   | 0.05                   |
| 0.26                    | 0.06                   | 0.15                   |
| 0.12                    | 0.30                   | 0.45                   |
| 0.12                    | 0.18                   | 0.25                   |
| 0.13                    | 0.19                   | 0.02                   |
| 0.13                    | 0.14                   | 0.08                   |
| 0.14                    | 0.13                   | 0.08                   |
| 0.10                    | 0.07                   | 0.02                   |
| 0.07                    | 0.07                   | 0.26                   |
| 0.16                    | 0.14                   | 0.22                   |
| 0.19                    | 0.21                   | 0.06                   |
| 0.14                    | 0.17                   | 0.23                   |
| 0.12                    | 0.50                   | 0.21                   |
| 0.17                    | 0.19                   | 0.10                   |
| 0.27                    | 0.06                   | 0.02                   |
| 0.15                    | 0.33                   | 0.14                   |
| 0.08                    | 0.05                   | 0.58                   |
| 0.16                    | 0.14                   | 0.17                   |
| 0.20                    | 0.08                   | 0.17                   |
| 0.11                    | 0.12                   | 0.14                   |
| 0.04                    | 0.01                   | 0.00                   |
| 0.18                    | 0.25                   | 0.07                   |
| 0.34                    | 0.22                   | 0.27                   |
| 0.11                    | 0.07                   | 0.20                   |
| 0.08                    | 0.05                   | 0.02                   |
| 0.09                    | 0.05                   | 0.04                   |
| 0.14                    | 0.07                   | 0.07                   |
| 0.24                    | 0.46                   | 0.20                   |
| 0.07                    | 0.06                   | 0.06                   |
| 0.04                    | 0.01                   | 0.01                   |
| 0.11                    | 0.21                   | 0.54                   |
| 0.11                    | 0.17                   | 0.11                   |
| 0.14                    | 0.07                   | 0.17                   |
| 0.11                    | 0.07                   | 0.10                   |

|      |      |      |
|------|------|------|
| 0.12 | 0.08 | 0.08 |
| 0.14 | 0.17 | 0.08 |
| 0.15 | 0.14 | 0.05 |
| 0.18 | 0.20 | 0.21 |
| 0.08 | 0.16 | 0.04 |
| 0.12 | 0.15 | 0.06 |
| 0.13 | 0.14 | 0.05 |
| 0.15 | 0.14 | 0.22 |
| 0.17 | 0.11 | 0.20 |
| 0.17 | 0.10 | 0.32 |
| 0.11 | 0.06 | 0.43 |
| 0.19 | 0.18 | 0.15 |
| 0.15 | 0.10 | 0.09 |
| 0.14 | 0.07 | 0.04 |
| 0.17 | 0.11 | 0.10 |
| 0.33 | 0.09 | 0.06 |
| 0.27 | 0.14 | 0.14 |
| 0.20 | 0.15 | 0.13 |
| 0.42 | 0.04 | 0.08 |
| 0.37 | 0.12 | 0.31 |
| 0.23 | 0.13 | 0.08 |
| 0.07 | 0.24 | 0.05 |
| 0.16 | 0.08 | 0.04 |
| 0.19 | 0.05 | 0.16 |
| 0.03 | 0.01 | 0.02 |
| 0.15 | 0.12 | 0.07 |
| 0.12 | 0.19 | 0.18 |
| 0.07 | 0.18 | 0.06 |
| 0.26 | 0.19 | 0.31 |
| 0.10 | 0.15 | 0.33 |
| 0.11 | 0.09 | 0.09 |
| 0.12 | 0.14 | 0.19 |
| 0.07 | 0.07 | 0.04 |
| 0.11 | 0.19 | 0.33 |
| 0.13 | 0.19 | 0.14 |
| 0.09 | 0.07 | 0.15 |
| 0.13 | 0.15 | 0.17 |
| 0.13 | 0.12 | 0.08 |
| 0.14 | 0.38 | 0.20 |
| 0.12 | 0.11 | 0.25 |
| 0.18 | 0.21 | 0.23 |
| 0.12 | 0.44 | 0.04 |
| 0.13 | 0.17 | 0.06 |
| 0.18 | 0.34 | 0.14 |
| 0.27 | 0.20 | 0.14 |
| 0.00 | 0.00 | 0.00 |
| 0.00 | 0.00 | 0.00 |
| 0.00 | 0.00 | 0.00 |





28

29

30

---

A\_1

A\_13

A\_14

---

|       |       |       |
|-------|-------|-------|
| 0.13  |       |       |
| 0.17  | 0.67  |       |
| -0.11 | 0.01  | 0.33  |
| 0.25  | 0.64  | 0.78  |
| 0.11  | 0.01  | -0.07 |
| -0.28 | -0.05 | -0.13 |
| -0.19 | -0.20 | -0.05 |
| -0.28 | -0.01 | -0.22 |
| -0.05 | -0.28 | -0.02 |
| 0.02  | 0.27  | 0.25  |
| 0.33  | 0.09  | 0.18  |
| -0.24 | -0.02 | -0.23 |
| -0.29 | -0.20 | -0.17 |
| -0.22 | -0.19 | -0.18 |
| -0.35 | -0.17 | -0.27 |
| 0.14  | 0.36  | 0.27  |
| -0.31 | 0.03  | 0.06  |
| -0.28 | -0.27 | -0.22 |
| 0.02  | 0.33  | -0.07 |
| -0.42 | 0.03  | -0.33 |
| -0.02 | -0.16 | -0.27 |
| -0.27 | -0.05 | -0.32 |
| -0.01 | 0.03  | -0.20 |
| -0.30 | 0.06  | -0.15 |
| -0.25 | -0.08 | -0.09 |
| -0.26 | 0.03  | -0.30 |
| -0.27 | 0.04  | -0.09 |



|       |       |       |
|-------|-------|-------|
| -0.31 | 0.04  | -0.01 |
| -0.06 | 0.08  | -0.05 |
| 0.86  | 0.03  | 0.05  |
| -0.40 | -0.07 | -0.32 |
| -0.11 | 0.03  | -0.33 |
| -0.05 | 0.03  | -0.27 |
| 0.86  | 0.06  | 0.15  |
| -0.16 | -0.25 | -0.11 |
| -0.04 | -0.07 | -0.23 |
| 0.40  | 0.06  | 0.04  |
| 0.03  | 0.03  | 0.20  |
| 0.44  | 0.21  | 0.33  |
| -0.02 | 0.45  | 0.69  |
| -0.12 | -0.36 | -0.23 |
| -0.09 | 0.03  | -0.18 |
| -0.10 | 0.09  | 0.15  |
| 0.22  | 0.39  | 0.27  |
| 0.32  | -0.01 | 0.20  |
| 0.22  | -0.04 | -0.06 |
| -0.23 | -0.22 | -0.17 |
| 0.24  | 0.02  | -0.22 |
| 0.07  | 0.59  | 0.65  |
| 0.01  | 0.48  | 0.47  |
| 0.30  | 0.16  | 0.08  |
| 0.17  | 0.29  | 0.03  |
| -0.06 | -0.17 | -0.14 |
| -0.02 | 0.30  | -0.02 |
| -0.29 | -0.23 | -0.38 |
| 0.69  | 0.07  | 0.04  |
| 0.81  | 0.03  | 0.10  |
| -0.15 | 0.04  | -0.18 |
| -0.11 | 0.20  | -0.24 |
| -0.03 | 0.01  | -0.17 |
| 0.15  | 0.53  | 0.38  |
| -0.15 | 0.09  | -0.12 |
| 0.34  | 0.15  | 0.18  |
| -0.15 | 0.35  | 0.36  |
| -0.43 | -0.20 | -0.44 |
| 0.30  | 0.39  | 0.34  |
| 0.04  | 0.15  | 0.19  |

|                         |                        |                        |
|-------------------------|------------------------|------------------------|
| 26                      | 27                     | 28                     |
| 128                     | 129                    | 130                    |
| TGAGCGCCTCGACGACAGAGCCG | ACTCCAGCCCCACAGCCTCAGC | TGGGTCTTTGCGGGCGAGATGA |
| miR-339-3p              | miR-766-3p             | miR-193a-5p            |
| 12315                   | 12195                  | 11818                  |
| 0.88                    | -0.44                  | -0.63                  |
| -1.52                   | 0.51                   | -0.46                  |
| -0.69                   | -0.56                  | -0.30                  |
| -0.69                   | -0.77                  | -0.16                  |
| -1.02                   | 1.23                   | 1.71                   |
| -0.78                   | -1.00                  | -0.45                  |
| 0.66                    | -0.48                  | 0.04                   |
| 0.73                    | 0.13                   | -0.29                  |
| -1.17                   | -0.24                  | -0.64                  |
| -1.20                   | -0.47                  | -0.71                  |
| -1.17                   | 0.12                   | -0.63                  |
| -0.11                   | -1.03                  | -0.01                  |
| 1.27                    | -0.56                  | -0.44                  |
| 0.43                    | 0.98                   | 0.18                   |
| 0.01                    | -0.19                  | -0.20                  |
| 0.44                    | -0.13                  | -0.44                  |
| 0.68                    | 0.31                   | -0.01                  |
| 2.47                    | -0.31                  | -0.33                  |
| -0.04                   | 0.04                   | -0.53                  |
| -0.29                   | -0.39                  | -0.48                  |

|       |       |       |
|-------|-------|-------|
| -0.16 | -0.70 | -0.50 |
| 1.08  | 0.33  | 0.55  |
| 1.28  | 0.37  | 0.73  |
| 1.08  | 0.36  | 0.06  |
| -1.52 | 4.15  | 4.30  |
| -0.35 | -0.58 | -0.07 |
| -0.33 | -0.70 | -0.31 |
| -0.78 | -0.69 | -0.60 |
| -0.78 | 0.10  | -0.45 |
| -0.82 | 0.29  | -0.69 |
| -1.07 | 2.23  | -0.75 |
| -0.91 | 2.03  | -0.68 |
| -1.40 | 1.16  | 0.36  |
| -0.44 | -0.13 | 0.89  |
| -0.04 | 0.09  | 0.33  |
| 0.23  | -0.02 | -0.06 |
| -1.15 | -1.01 | -0.66 |
| -0.06 | -0.92 | -0.76 |
| -0.32 | -0.34 | -0.59 |
| 0.57  | -0.46 | -0.26 |
| -0.12 | 3.48  | 0.02  |
| 1.11  | 14.49 | -0.28 |
| 0.44  | 0.41  | 0.12  |
| -0.15 | -0.39 | -0.22 |
| 0.95  | 0.52  | 0.17  |
| -0.67 | 1.69  | 0.43  |
| 0.34  | 0.12  | -0.09 |
| 0.82  | -0.18 | 0.05  |
| 0.46  | -0.38 | -0.27 |
| 1.06  | -0.40 | -0.30 |
| 1.25  | -0.08 | -0.42 |
| 0.50  | 1.62  | 0.08  |
| 0.00  | 0.85  | 0.57  |
| 0.88  | -0.05 | 0.06  |
| -0.24 | -0.60 | 0.26  |
| 0.18  | 0.04  | -0.11 |
| 0.30  | -0.67 | -0.23 |
| -0.75 | -1.00 | -0.47 |
| -0.12 | -0.38 | 1.06  |
| -0.44 | -0.54 | 1.00  |
| -0.94 | -0.73 | 0.61  |
| -1.01 | -1.04 | -0.69 |
| -0.88 | -0.61 | -0.40 |
| -0.37 | -0.92 | -0.38 |
| -1.07 | -0.98 | -0.37 |
| -0.50 | -0.65 | 0.15  |
| -0.74 | -0.65 | -0.77 |
| -1.52 | 0.99  | 0.01  |
| -0.06 | 1.32  | -0.15 |
| 0.54  | 0.81  | 0.44  |
| 0.20  | -0.27 | -0.26 |
| -0.05 | -1.10 | -0.76 |
| -0.45 | -0.80 | -0.57 |
| 0.29  | -0.57 | -0.34 |
| 1.36  | 17.98 | 1.07  |
| -0.56 | -0.82 | -0.22 |
| -0.54 | 0.05  | -0.26 |
| 0.57  | -0.89 | -0.36 |
| -0.39 | 0.30  | -0.20 |

|       |       |       |
|-------|-------|-------|
| -0.42 | 0.21  | -0.42 |
| -0.71 | 1.56  | 0.23  |
| 0.09  | -0.03 | -0.40 |
| 0.94  | -0.54 | -0.66 |
| -0.22 | -0.71 | -0.67 |
| -0.87 | -0.90 | -0.63 |
| 0.89  | 0.16  | -0.60 |
| 0.82  | -0.23 | -0.26 |
| -0.16 | -0.50 | -0.18 |
| 0.14  | -0.55 | -0.16 |
| 0.16  | 0.30  | -0.10 |
| -1.22 | -0.68 | -0.12 |
| -0.22 | -0.31 | -0.03 |
| 0.89  | 0.32  | 0.43  |
| -1.15 | -0.28 | -0.28 |
| -0.92 | -0.61 | -0.79 |
| -1    | 0     | -1    |
| 0.00  | 0.00  | 0.00  |
| 1.00  | 1.00  | 1.00  |
| 0.81  | 0.97  | 0.31  |

| 128                     | 129                    | 130                    |
|-------------------------|------------------------|------------------------|
| 12315.00                | 12195.00               | 11818.00               |
| miR-339-3p              | miR-766-3p             | miR-193a-5p            |
| TGAGCGCCTCGACGACAGAGCCG | ACTCCAGCCCCACAGCCTCAGC | TGGGTCTTTGCGGGCGAGATGA |
| 0.88                    | -0.44                  | -0.63                  |
| -1.52                   | 0.51                   | -0.46                  |
| -0.69                   | -0.56                  | -0.30                  |
| -0.69                   | -0.77                  | -0.16                  |
| -1.02                   | 1.23                   | 1.71                   |
| -0.78                   | -1.00                  | -0.45                  |
| 0.66                    | -0.48                  | 0.04                   |
| 0.73                    | 0.13                   | -0.29                  |
| -1.17                   | -0.24                  | -0.64                  |
| -1.20                   | -0.47                  | -0.71                  |
| -1.17                   | 0.12                   | -0.63                  |
| -0.11                   | -1.03                  | -0.01                  |
| 1.27                    | -0.56                  | -0.44                  |
| 0.43                    | 0.98                   | 0.18                   |
| 0.01                    | -0.19                  | -0.20                  |
| 0.44                    | -0.13                  | -0.44                  |
| 0.68                    | 0.31                   | -0.01                  |
| 2.47                    | -0.31                  | -0.33                  |
| -0.04                   | 0.04                   | -0.53                  |
| -0.29                   | -0.39                  | -0.48                  |
| -0.16                   | -0.70                  | -0.50                  |
| 1.08                    | 0.33                   | 0.55                   |
| 1.28                    | 0.37                   | 0.73                   |
| 1.08                    | 0.36                   | 0.06                   |
| -1.52                   | 4.15                   | 4.30                   |
| -0.35                   | -0.58                  | -0.07                  |
| -0.33                   | -0.70                  | -0.31                  |
| -0.78                   | -0.69                  | -0.60                  |

|       |       |       |
|-------|-------|-------|
| -0.78 | 0.10  | -0.45 |
| -0.82 | 0.29  | -0.69 |
| -1.07 | 2.23  | -0.75 |
| -0.91 | 2.03  | -0.68 |
| -1.40 | 1.16  | 0.36  |
| -0.44 | -0.13 | 0.89  |
| -0.04 | 0.09  | 0.33  |
| 0.23  | -0.02 | -0.06 |
| -1.15 | -1.01 | -0.66 |
| -0.06 | -0.92 | -0.76 |
| -0.32 | -0.34 | -0.59 |
| 0.57  | -0.46 | -0.26 |
| -0.12 | 3.48  | 0.02  |
| 1.11  | 14.49 | -0.28 |
| 0.44  | 0.41  | 0.12  |
| -0.15 | -0.39 | -0.22 |
| 0.95  | 0.52  | 0.17  |
| -0.67 | 1.69  | 0.43  |
| 0.34  | 0.12  | -0.09 |
| 0.82  | -0.18 | 0.05  |
| 0.46  | -0.38 | -0.27 |
| 1.06  | -0.40 | -0.30 |
| 1.25  | -0.08 | -0.42 |
| 0.50  | 1.62  | 0.08  |
| 0.00  | 0.85  | 0.57  |
| 0.88  | -0.05 | 0.06  |
| -0.24 | -0.60 | 0.26  |
| 0.18  | 0.04  | -0.11 |
| 0.30  | -0.67 | -0.23 |
| -0.75 | -1.00 | -0.47 |
| -0.12 | -0.38 | 1.06  |
| -0.44 | -0.54 | 1.00  |
| -0.94 | -0.73 | 0.61  |
| -1.01 | -1.04 | -0.69 |
| -0.88 | -0.61 | -0.40 |
| -0.37 | -0.92 | -0.38 |
| -1.07 | -0.98 | -0.37 |
| -0.50 | -0.65 | 0.15  |
| -0.74 | -0.65 | -0.77 |
| -1.52 | 0.99  | 0.01  |
| -0.06 | 1.32  | -0.15 |
| 0.54  | 0.81  | 0.44  |
| 0.20  | -0.27 | -0.26 |
| -0.05 | -1.10 | -0.76 |
| -0.45 | -0.80 | -0.57 |
| 0.29  | -0.57 | -0.34 |
| 1.36  | 17.98 | 1.07  |
| -0.56 | -0.82 | -0.22 |
| -0.54 | 0.05  | -0.26 |
| 0.57  | -0.89 | -0.36 |
| -0.39 | 0.30  | -0.20 |
| -0.42 | 0.21  | -0.42 |
| -0.71 | 1.56  | 0.23  |
| 0.09  | -0.03 | -0.40 |
| 0.94  | -0.54 | -0.66 |
| -0.22 | -0.71 | -0.67 |
| -0.87 | -0.90 | -0.63 |
| 0.89  | 0.16  | -0.60 |
| 0.82  | -0.23 | -0.26 |

|       |       |       |
|-------|-------|-------|
| -0.16 | -0.50 | -0.18 |
| 0.14  | -0.55 | -0.16 |
| 0.16  | 0.30  | -0.10 |
| -1.22 | -0.68 | -0.12 |
| -0.22 | -0.31 | -0.03 |
| 0.89  | 0.32  | 0.43  |
| -1.15 | -0.28 | -0.28 |
| -0.92 | -0.61 | -0.79 |

---

|                        |                      |                        |
|------------------------|----------------------|------------------------|
| 128                    | 129                  | 130                    |
| 105                    | 86                   | 58                     |
| TGTAACAGCAACTCCATGTGGA | CCTCTGGGCCCTTCCTCCAG | AACATTCAACCTGTCGGTGAGT |
| miR-194-5p             | miR-326              | miR-181c-5p            |
| 25540                  | 49098                | 125038                 |
| -0.50                  | 2.24                 | -0.50                  |
| 1.09                   | -1.55                | -1.47                  |
| 1.23                   | -0.84                | -0.55                  |
| 0.17                   | -0.78                | -0.98                  |
| -0.08                  | -0.87                | 0.26                   |
| -0.08                  | -0.98                | -0.88                  |
| -0.76                  | 0.64                 | -0.27                  |
| -0.73                  | -0.03                | 0.06                   |
| -0.31                  | -0.96                | -1.04                  |
| 0.90                   | -1.05                | -1.47                  |
| 0.17                   | -0.63                | 0.04                   |
| -1.22                  | -0.57                | 0.05                   |
| 2.42                   | 0.84                 | 2.83                   |
| -0.90                  | 0.29                 | -0.52                  |
| -0.13                  | 0.14                 | -0.10                  |
| 1.51                   | 0.33                 | 1.24                   |
| -0.73                  | 2.07                 | 0.00                   |
| 0.68                   | 1.42                 | 0.46                   |
| -0.19                  | -0.39                | 0.62                   |
| 0.85                   | -0.03                | 1.60                   |
| -0.14                  | -0.71                | -1.20                  |
| -1.30                  | 1.43                 | 1.50                   |
| -0.92                  | 0.88                 | 0.66                   |
| -0.82                  | 0.65                 | -0.36                  |
| -1.17                  | -1.08                | -0.69                  |
| -0.88                  | -0.12                | 0.64                   |
| 1.85                   | -0.34                | 0.09                   |
| 8.06                   | -0.80                | -0.39                  |
| 1.27                   | -1.13                | -0.81                  |
| 0.76                   | -1.22                | -1.31                  |
| -0.56                  | -1.35                | -1.85                  |
| 2.25                   | -1.29                | -1.36                  |
| 1.82                   | -0.51                | 0.51                   |
| -0.71                  | 0.89                 | 3.03                   |
| 1.25                   | 2.96                 | 0.77                   |
| -0.90                  | 0.97                 | 0.44                   |
| -1.26                  | -1.16                | -1.63                  |
| 1.43                   | 0.76                 | 0.01                   |
| 0.76                   | 3.53                 | 1.78                   |

|       |       |       |
|-------|-------|-------|
| -0.49 | 0.39  | 1.51  |
| -1.05 | 19.65 | -1.56 |
| -0.98 | 91.37 | -1.01 |
| -0.94 | 1.00  | -0.49 |
| 1.76  | 0.30  | 0.39  |
| -0.39 | -0.53 | -0.49 |
| -0.94 | 8.68  | -1.50 |
| 0.16  | 0.53  | 3.44  |
| -0.77 | 0.69  | 2.39  |
| 0.47  | 0.52  | 0.87  |
| -0.61 | 0.41  | 2.72  |
| 0.45  | 0.80  | 0.56  |
| -1.04 | 1.31  | -0.70 |
| -0.95 | 0.33  | -1.22 |
| -0.39 | 1.02  | 0.24  |
| -0.86 | -0.86 | -0.80 |
| -0.88 | -0.14 | -0.76 |
| 0.17  | -0.70 | -1.17 |
| 1.99  | -0.62 | 0.93  |
| -1.09 | -0.17 | 0.55  |
| 0.51  | -0.71 | 1.93  |
| -0.33 | -0.73 | 0.98  |
| 2.90  | -1.04 | -0.32 |
| -1.18 | -0.39 | -0.55 |
| -0.55 | -0.68 | -1.02 |
| 0.15  | -0.96 | -0.54 |
| -0.94 | -0.48 | -0.60 |
| 2.71  | -0.27 | -1.08 |
| 0.09  | -1.55 | -1.28 |
| 0.49  | -0.17 | -0.73 |
| 1.91  | 0.57  | 1.85  |
| -0.10 | -0.08 | -0.67 |
| 4.86  | -1.53 | -0.96 |
| 0.52  | -0.77 | -0.67 |
| 3.26  | 0.24  | 0.92  |
| -1.53 | 87.60 | -1.84 |
| 0.03  | -0.36 | 0.47  |
| 0.42  | -0.68 | -0.13 |
| 1.24  | -1.28 | -0.71 |
| 0.53  | 2.29  | 2.33  |
| 0.33  | 0.20  | 2.48  |
| -0.53 | 0.26  | 1.12  |
| -0.49 | -0.20 | 0.81  |
| -0.56 | -0.01 | 1.16  |
| 1.47  | 1.08  | 2.75  |
| 2.20  | -0.89 | 0.03  |
| -0.19 | 1.46  | 1.59  |
| -0.47 | 0.10  | 2.45  |
| -0.20 | -0.06 | -0.01 |
| 0.87  | -0.52 | 0.77  |
| -0.39 | 0.29  | 0.39  |
| -0.85 | -1.36 | 2.24  |
| -0.73 | -1.01 | -0.87 |
| -0.84 | 0.84  | 1.01  |
| -0.52 | -0.83 | -0.12 |
| 0.65  | 0.86  | -0.95 |
| 1.95  | 2.07  | 2.25  |
| 1.00  | 0.54  | 0.59  |













































































































































































ion of 29s

|    |    |
|----|----|
| NP | P  |
| 26 | 17 |
| 29 | 27 |
| 15 | 33 |
| 32 | 24 |
| 30 | 21 |
| 25 | 12 |
| 42 | 23 |
| 36 | 21 |
| 17 | 33 |
| 32 | 25 |

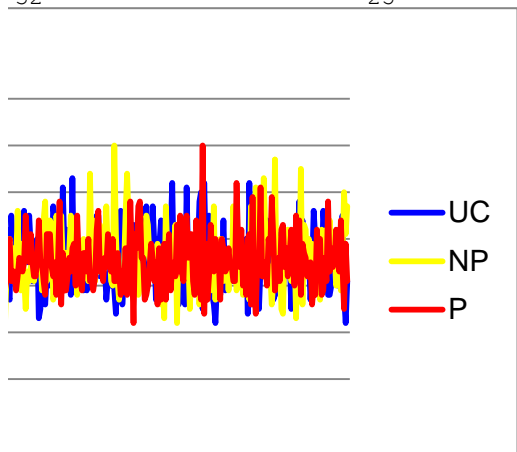

|    |    |
|----|----|
| 42 | 21 |
| 25 | 23 |
| 27 | 19 |
| 19 | 25 |
| 19 | 35 |
| 15 | 23 |
| 32 | 25 |
| 21 | 29 |
| 24 | 17 |
| 21 | 23 |
| 26 | 23 |
| 29 | 31 |
| 30 | 24 |
| 19 | 29 |
| 17 | 40 |
| 39 | 22 |
| 17 | 18 |
| 15 | 21 |
| 24 | 29 |
| 25 | 27 |
| 23 | 16 |
| 21 | 16 |
| 33 | 23 |
| 25 | 29 |
| 25 | 27 |
| 22 | 30 |
| 20 | 34 |

|    |    |
|----|----|
| 26 | 23 |
| 30 | 32 |
| 38 | 20 |
| 18 | 23 |
| 28 | 30 |
| 19 | 34 |
| 32 | 33 |
| 16 | 27 |
| 18 | 22 |
| 22 | 37 |
| 12 | 26 |
| 23 | 21 |
| 19 | 23 |
| 38 | 21 |
| 30 | 15 |
| 25 | 23 |
| 26 | 24 |
| 36 | 26 |
| 25 | 33 |
| 25 | 20 |
| 34 | 28 |
| 21 | 24 |
| 34 | 15 |
| 17 | 32 |
| 30 | 28 |
| 28 | 16 |
| 32 | 27 |
| 31 | 17 |
| 37 | 34 |
| 24 | 37 |
| 18 | 42 |
| 26 | 30 |
| 35 | 30 |
| 22 | 25 |
| 24 | 24 |
| 25 | 23 |
| 23 | 28 |
| 27 | 29 |
| 16 | 38 |
| 22 | 40 |
| 27 | 22 |
| 21 | 26 |
| 22 | 23 |
| 19 | 33 |
| 25 | 24 |
| 22 | 26 |
| 23 | 27 |
| 24 | 20 |
| 17 | 26 |
| 25 | 32 |
| 40 | 26 |
| 21 | 22 |
| 31 | 15 |
| 25 | 31 |
| 22 | 23 |
| 26 | 29 |
| 28 | 19 |
| 29 | 28 |
| 26 | 34 |

24  
24  
36  
25  
29  
22  
18  
31  
23  
30  
17  
28  
23  
20  
27  
35  
20  
17  
42  
27  
19  
31  
24  
25  
24  
17  
24  
13  
26  
22  
26  
19  
32  
35  
28  
17  
20  
29  
28  
17  
29  
33  
26  
25  
26  
31  
21  
26  
23  
22  
20  
24  
37  
57  
27  
24  
25  
33  
19

17  
30  
30  
30  
23  
36  
28  
36  
29  
17  
16  
29  
20  
29  
23  
33  
29  
22  
22  
24  
29  
31  
34  
21  
28  
24  
29  
31  
26  
32  
28  
23  
22  
24  
18  
25  
27  
18  
29  
35  
33  
14  
20  
29  
19  
29  
14  
28  
36  
19  
24  
34  
25  
26  
17  
19  
34  
27  
24

|    |    |
|----|----|
| 21 | 25 |
| 29 | 24 |
| 21 | 30 |
| 29 | 15 |
| 18 | 34 |
| 23 | 23 |
| 28 | 25 |
| 29 | 27 |
| 32 | 19 |
| 31 | 14 |
| 24 | 30 |
| 35 | 38 |
| 27 | 17 |
| 30 | 24 |
| 20 | 23 |
| 22 | 34 |
| 14 | 30 |
| 22 | 25 |
| 24 | 28 |
| 45 | 15 |
| 24 | 13 |
| 15 | 28 |
| 23 | 23 |
| 28 | 26 |
| 26 | 22 |
| 11 | 22 |
| 18 | 20 |
| 24 | 28 |
| 27 | 22 |
| 14 | 34 |
| 30 | 18 |
| 22 | 26 |
| 29 | 20 |
| 22 | 22 |
| 15 | 16 |
| 18 | 25 |
| 21 | 39 |
| 30 | 11 |
| 25 | 22 |
| 49 | 26 |
| 20 | 17 |
| 30 | 20 |
| 17 | 20 |
| 31 | 29 |
| 26 | 23 |
| 23 | 39 |
| 24 | 20 |
| 44 | 26 |
| 21 | 52 |
| 22 | 24 |
| 30 | 23 |
| 29 | 40 |
| 31 | 27 |
| 32 | 14 |
| 25 | 29 |
| 24 | 26 |
| 30 | 20 |
| 22 | 33 |
| 20 | 25 |

|    |    |
|----|----|
| 19 | 22 |
| 21 | 18 |
| 23 | 20 |
| 30 | 21 |
| 28 | 28 |
| 36 | 22 |
| 33 | 32 |
| 22 | 24 |
| 29 | 23 |
| 30 | 28 |
| 18 | 30 |
| 24 | 21 |
| 23 | 35 |
| 28 | 16 |
| 18 | 31 |
| 18 | 35 |
| 22 | 18 |
| 16 | 17 |
| 28 | 21 |
| 24 | 21 |
| 17 | 22 |
| 48 | 17 |
| 24 | 21 |
| 25 | 23 |
| 31 | 22 |
| 19 | 20 |
| 13 | 29 |
| 33 | 20 |
| 20 | 25 |
| 27 | 21 |
| 18 | 22 |
| 52 | 10 |
| 26 | 27 |
| 21 | 36 |
| 36 | 23 |
| 26 | 33 |
| 27 | 15 |
| 25 | 16 |
| 22 | 34 |
| 9  | 24 |
| 20 | 22 |
| 26 | 27 |
| 26 | 28 |
| 27 | 23 |
| 25 | 16 |
| 21 | 27 |
| 22 | 18 |
| 28 | 21 |
| 26 | 25 |
| 28 | 23 |
| 23 | 20 |
| 25 | 28 |
| 24 | 25 |
| 22 | 35 |
| 22 | 22 |
| 23 | 22 |
| 23 | 17 |
| 25 | 26 |
| 32 | 12 |



|    |    |
|----|----|
| 24 | 32 |
| 21 | 41 |
| 18 | 16 |
| 27 | 20 |
| 19 | 17 |
| 19 | 30 |
| 39 | 27 |
| 25 | 13 |
| 31 | 34 |
| 24 | 14 |
| 14 | 36 |
| 36 | 22 |
| 33 | 24 |
| 23 | 23 |
| 40 | 38 |
| 25 | 25 |
| 27 | 31 |
| 23 | 20 |
| 56 | 22 |
| 29 | 33 |
| 26 | 31 |
| 21 | 22 |
| 18 | 28 |
| 19 | 29 |
| 28 | 19 |
| 18 | 37 |
| 21 | 44 |
| 26 | 24 |
| 20 | 25 |
| 23 | 26 |
| 22 | 30 |
| 17 | 34 |
| 21 | 30 |
| 19 | 32 |
| 22 | 26 |
| 27 | 16 |
| 26 | 19 |
| 35 | 10 |
| 24 | 36 |
| 30 | 18 |
| 29 | 14 |
| 40 | 20 |
| 15 | 39 |
| 29 | 27 |
| 23 | 12 |
| 20 | 18 |
| 24 | 28 |
| 20 | 26 |
| 27 | 17 |
| 28 | 17 |
| 34 | 24 |
| 31 | 26 |
| 30 | 27 |
| 20 | 22 |
| 17 | 41 |
| 38 | 15 |
| 24 | 28 |
| 26 | 32 |
| 26 | 18 |

|    |    |
|----|----|
| 14 | 35 |
| 21 | 23 |
| 29 | 31 |
| 33 | 24 |
| 44 | 13 |
| 25 | 26 |
| 21 | 35 |
| 33 | 24 |
| 22 | 26 |
| 38 | 23 |
| 25 | 28 |
| 15 | 24 |
| 41 | 11 |
| 27 | 18 |
| 26 | 33 |
| 21 | 24 |
| 21 | 17 |
| 34 | 21 |
| 27 | 27 |
| 21 | 21 |
| 15 | 20 |
| 35 | 23 |
| 31 | 25 |
| 22 | 34 |
| 8  | 23 |
| 32 | 40 |
| 29 | 21 |
| 18 | 24 |
| 29 | 22 |
| 33 | 28 |
| 20 | 38 |
| 17 | 26 |
| 14 | 37 |
| 23 | 33 |
| 24 | 37 |
| 23 | 34 |
| 25 | 23 |
| 20 | 23 |
| 35 | 22 |
| 26 | 32 |
| 25 | 28 |
| 21 | 25 |
| 17 | 31 |
| 31 | 31 |
| 26 | 21 |
| 32 | 37 |
| 12 | 28 |
| 23 | 26 |
| 43 | 15 |
| 21 | 34 |
| 10 | 44 |
| 33 | 23 |
| 26 | 21 |
| 30 | 25 |
| 30 | 34 |
| 21 | 50 |
| 31 | 39 |
| 28 | 37 |
| 24 | 15 |

|    |    |
|----|----|
| 29 | 21 |
| 19 | 14 |
| 24 | 23 |
| 27 | 25 |
| 16 | 28 |
| 26 | 28 |
| 28 | 28 |
| 23 | 32 |
| 24 | 25 |
| 30 | 23 |
| 23 | 26 |
| 35 | 15 |
| 24 | 33 |
| 18 | 26 |
| 27 | 20 |
| 21 | 37 |
| 29 | 28 |
| 31 | 25 |
| 27 | 39 |
| 18 | 38 |
| 37 | 19 |
| 22 | 22 |
| 41 | 28 |
| 11 | 44 |
| 28 | 25 |
| 19 | 31 |
| 28 | 14 |
| 39 | 13 |
| 23 | 25 |
| 23 | 19 |
| 29 | 21 |
| 21 | 21 |
| 29 | 21 |
| 32 | 22 |
| 34 | 22 |
| 22 | 21 |
| 30 | 19 |
| 28 | 21 |
| 33 | 27 |
| 13 | 24 |
| 41 | 24 |
| 35 | 20 |
| 24 | 36 |
| 12 | 24 |
| 25 | 29 |
| 19 | 24 |
| 29 | 21 |
| 29 | 25 |
| 19 | 25 |
| 23 | 30 |
| 26 | 21 |
| 31 | 37 |
| 21 | 24 |
| 25 | 38 |
| 20 | 25 |
| 23 | 18 |
| 35 | 25 |
| 24 | 19 |
| 25 | 24 |

|    |    |
|----|----|
| 20 | 30 |
| 27 | 26 |
| 20 | 22 |
| 36 | 21 |
| 24 | 21 |
| 29 | 20 |
| 22 | 22 |
| 26 | 27 |
| 14 | 35 |
| 22 | 42 |
| 30 | 32 |
| 31 | 19 |
| 20 | 29 |
| 27 | 36 |
| 28 | 26 |
| 27 | 24 |
| 19 | 28 |
| 33 | 17 |
| 23 | 29 |
| 20 | 25 |
| 44 | 23 |
| 19 | 26 |
| 22 | 31 |
| 27 | 29 |
| 20 | 25 |
| 21 | 23 |
| 24 | 27 |
| 27 | 36 |
| 26 | 31 |
| 24 | 25 |
| 18 | 28 |
| 32 | 17 |
| 14 | 31 |
| 21 | 33 |
| 20 | 25 |
| 30 | 30 |
| 42 | 21 |
| 35 | 24 |
| 24 | 23 |
| 27 | 26 |
| 23 | 29 |
| 29 | 24 |
| 28 | 19 |
| 25 | 21 |
| 23 | 19 |
| 32 | 17 |
| 20 | 17 |
| 19 | 22 |
| 30 | 17 |
| 24 | 35 |
| 19 | 19 |
| 21 | 34 |
| 16 | 29 |
| 45 | 24 |
| 15 | 35 |
| 29 | 16 |
| 15 | 32 |
| 34 | 22 |
| 46 | 15 |

|    |    |
|----|----|
| 18 | 33 |
| 18 | 26 |
| 18 | 33 |
| 17 | 35 |
| 46 | 18 |
| 19 | 19 |
| 21 | 28 |
| 26 | 31 |
| 27 | 16 |
| 27 | 46 |
| 31 | 15 |
| 16 | 28 |
| 20 | 13 |
| 32 | 21 |
| 34 | 22 |
| 22 | 31 |
| 26 | 24 |
| 23 | 19 |
| 14 | 34 |
| 18 | 31 |
| 45 | 31 |
| 25 | 32 |
| 19 | 33 |
| 27 | 22 |
| 20 | 18 |
| 21 | 36 |
| 15 | 30 |
| 27 | 24 |
| 31 | 17 |
| 24 | 35 |
| 18 | 24 |
| 24 | 16 |
| 19 | 38 |
| 17 | 27 |
| 22 | 17 |
| 37 | 37 |
| 12 | 25 |
| 28 | 23 |
| 20 | 24 |
| 27 | 26 |
| 32 | 32 |
| 18 | 33 |
| 27 | 19 |
| 28 | 32 |
| 21 | 17 |
| 25 | 23 |
| 22 | 36 |
| 29 | 37 |
| 16 | 33 |
| 21 | 16 |
| 27 | 17 |
| 20 | 16 |
| 17 | 50 |
| 25 | 33 |
| 17 | 31 |
| 34 | 28 |
| 20 | 24 |
| 32 | 34 |

|    |    |
|----|----|
| 33 | 24 |
| 22 | 23 |
| 25 | 37 |
| 23 | 34 |
| 26 | 21 |
| 24 | 24 |
| 29 | 31 |
| 20 | 17 |
| 18 | 20 |
| 33 | 13 |
| 32 | 18 |
| 25 | 18 |
| 18 | 30 |
| 24 | 25 |
| 25 | 23 |
| 29 | 24 |
| 20 | 26 |
| 22 | 21 |
| 24 | 22 |
| 24 | 20 |
| 30 | 34 |
| 20 | 41 |
| 18 | 33 |
| 23 | 17 |
| 17 | 28 |
| 28 | 33 |
| 31 | 16 |
| 20 | 13 |
| 23 | 37 |
| 23 | 33 |
| 25 | 33 |
| 25 | 18 |
| 18 | 36 |
| 20 | 23 |
| 25 | 20 |
| 22 | 27 |
| 26 | 22 |
| 23 | 18 |
| 15 | 14 |
| 33 | 16 |
| 33 | 20 |
| 18 | 28 |
| 29 | 21 |
| 21 | 14 |
| 24 | 24 |
| 23 | 21 |
| 26 | 28 |
| 23 | 16 |
| 25 | 31 |
| 31 | 32 |
| 28 | 24 |
| 20 | 27 |
| 30 | 19 |
| 24 | 34 |
| 35 | 12 |
| 33 | 20 |
| 30 | 20 |
| 23 | 23 |
| 29 | 25 |

19  
26  
30  
21  
33  
27  
31  
24  
42  
31  
19  
23  
23  
26  
32  
19  
23  
27  
29  
18  
17  
27  
30  
30  
25  
24  
23  
21  
23  
21  
30  
18  
30  
21  
28  
31  
23  
10  
26  
20  
17  
23  
41  
16  
25  
19  
23  
28  
46  
27  
30  
38  
19  
25  
28  
23  
19  
26  
37

21  
30  
26  
28  
21  
29  
18  
28  
24  
25  
21  
21  
21  
19  
21  
28  
33  
24  
29  
25  
34  
15  
25  
32  
20  
22  
23  
19  
33  
24  
24  
39  
23  
29  
12  
18  
35  
26  
26  
33  
22  
32  
19  
41  
20  
24  
30  
16  
20  
21  
28  
24  
20  
29  
19  
29  
29  
30  
22

|    |    |
|----|----|
| 29 | 18 |
| 19 | 27 |
| 13 | 36 |
| 23 | 39 |
| 18 | 33 |
| 21 | 21 |
| 19 | 29 |
| 30 | 17 |
| 42 | 20 |
| 21 | 29 |
| 19 | 21 |
| 31 | 27 |
| 21 | 17 |
| 27 | 19 |
| 26 | 17 |
| 31 | 22 |
| 18 | 26 |
| 28 | 20 |
| 15 | 17 |
| 24 | 25 |
| 22 | 38 |
| 27 | 19 |
| 17 | 18 |
| 21 | 20 |
| 15 | 18 |
| 11 | 15 |
| 28 | 41 |
| 32 | 32 |
| 34 | 20 |
| 24 | 37 |
| 30 | 21 |
| 23 | 19 |
| 19 | 32 |
| 20 | 21 |
| 27 | 21 |
| 24 | 18 |
| 22 | 20 |
| 21 | 24 |
| 17 | 26 |
| 27 | 20 |
| 37 | 20 |
| 21 | 29 |
| 30 | 19 |
| 20 | 37 |
| 41 | 20 |
| 23 | 28 |
| 30 | 27 |
| 21 | 25 |
| 21 | 31 |
| 32 | 20 |
| 30 | 23 |
| 24 | 25 |
| 24 | 24 |
| 29 | 16 |
| 32 | 25 |
| 31 | 12 |
| 36 | 21 |
| 17 | 30 |
| 15 | 53 |



24  
21  
17  
32  
20  
26  
27  
23  
22  
20  
28  
18  
27  
29  
19  
31  
28  
24  
28  
39  
38  
21  
28  
31  
27  
37  
18  
11  
22  
27  
30  
23  
28  
21  
25  
36  
21  
19  
29  
22  
15  
23  
21  
24  
26  
21  
24  
23  
26  
27  
19  
34  
38  
21  
30  
34  
33  
17  
19

17  
20  
32  
24  
29  
22  
25  
31  
31  
23  
16  
28  
17  
23  
30  
22  
19  
23  
28  
32  
16  
25  
30  
15  
22  
26  
38  
19  
21  
28  
30  
21  
23  
23  
19  
22  
26  
25  
23  
25  
35  
28  
25  
31  
25  
22  
22  
25  
34  
25  
25  
21  
18  
31  
31  
31  
24  
22  
25

|    |    |
|----|----|
| 35 | 18 |
| 31 | 25 |
| 22 | 38 |
| 35 | 16 |
| 25 | 27 |
| 25 | 19 |
| 27 | 19 |
| 24 | 22 |
| 27 | 26 |
| 35 | 23 |
| 28 | 28 |
| 33 | 29 |
| 24 | 20 |
| 18 | 35 |
| 23 | 25 |
| 25 | 21 |
| 27 | 19 |
| 30 | 27 |
| 25 | 27 |
| 29 | 23 |
| 21 | 30 |
| 44 | 21 |
| 25 | 21 |
| 34 | 19 |
| 21 | 22 |
| 29 | 32 |
| 23 | 36 |
| 33 | 23 |
| 25 | 25 |
| 23 | 21 |
| 24 | 26 |
| 37 | 24 |
| 27 | 31 |
| 30 | 25 |
| 21 | 23 |
| 20 | 30 |
| 50 | 21 |
| 31 | 21 |
| 21 | 27 |
| 17 | 23 |
| 22 | 18 |
| 22 | 23 |
| 23 | 19 |
| 35 | 28 |
| 44 | 18 |
| 33 | 21 |
| 21 | 38 |
| 20 | 26 |
| 29 | 12 |
| 30 | 31 |
| 27 | 28 |
| 18 | 37 |
| 20 | 38 |
| 22 | 26 |
| 25 | 26 |
| 29 | 17 |
| 35 | 18 |
| 33 | 20 |
| 26 | 24 |

|    |    |
|----|----|
| 22 | 29 |
| 23 | 26 |
| 27 | 21 |
| 25 | 25 |
| 29 | 16 |
| 24 | 28 |
| 16 | 17 |
| 26 | 24 |
| 13 | 29 |
| 37 | 17 |
| 27 | 26 |
| 26 | 31 |
| 30 | 19 |
| 23 | 24 |
| 25 | 25 |
| 33 | 22 |
| 12 | 33 |
| 30 | 23 |
| 25 | 35 |
| 29 | 23 |
| 26 | 21 |
| 24 | 33 |
| 22 | 35 |
| 27 | 26 |
| 15 | 31 |
| 24 | 31 |
| 28 | 21 |
| 31 | 18 |
| 22 | 34 |
| 31 | 28 |
| 16 | 20 |
| 26 | 17 |
| 18 | 50 |
| 17 | 14 |
| 21 | 29 |
| 22 | 17 |
| 25 | 22 |
| 19 | 33 |
| 24 | 27 |
| 37 | 23 |
| 17 | 30 |
| 28 | 27 |
| 24 | 26 |
| 30 | 17 |
| 30 | 30 |
| 21 | 28 |
| 22 | 23 |
| 26 | 24 |
| 19 | 28 |
| 26 | 24 |
| 23 | 24 |
| 37 | 21 |
| 27 | 21 |
| 19 | 42 |
| 21 | 29 |
| 22 | 24 |
| 28 | 32 |
| 18 | 20 |
| 20 | 27 |

25  
28  
17  
37  
28  
28  
41  
31  
23  
30  
29  
43  
32  
25  
24  
23  
16  
21  
47  
21  
27  
30  
15  
14  
28  
23  
32  
26  
21  
22  
29  
13  
31  
20  
45  
16  
33  
32  
22  
30  
24  
29  
24  
26  
22  
23  
17  
32  
23  
23  
32  
27  
34  
24  
27  
28  
20  
21  
23

18  
30  
31  
16  
39  
20  
14  
25  
24  
41  
22  
22  
25  
20  
30  
27  
39  
30  
19  
24  
26  
21  
32  
33  
24  
28  
22  
26  
32  
26  
20  
35  
21  
34  
18  
29  
27  
26  
22  
22  
25  
16  
20  
18  
32  
26  
30  
18  
19  
26  
21  
38  
23  
28  
24  
25  
32  
27  
23

19  
26  
40  
31  
37

34  
24  
15  
29  
21

|    |    |
|----|----|
| 16 | 27 |
| 24 | 35 |
| 18 | 24 |
| 24 | 16 |
| 19 | 38 |
| 17 | 27 |
| 22 | 17 |
| 37 | 37 |
| 12 | 25 |
| 28 | 23 |
| 20 | 24 |
| 27 | 26 |
| 32 | 32 |
| 18 | 33 |
| 27 | 19 |
| 28 | 32 |

21  
25  
22  
29  
16  
21  
27  
20  
17  
25  
17  
34  
20  
32  
33  
22  
25  
23  
26  
24  
29  
20  
18  
33  
32  
25  
18  
24  
25  
29  
20  
22  
24  
24  
30  
20  
18  
23  
17  
28  
31  
20  
23  
23  
25  
25  
18  
20  
25  
22  
26  
23  
15  
33  
33  
18  
29  
21  
24

17  
23  
36  
37  
33  
16  
17  
16  
50  
33  
31  
28  
24  
34  
24  
23  
37  
34  
21  
24  
31  
17  
20  
13  
18  
18  
30  
25  
23  
24  
26  
21  
22  
20  
34  
41  
33  
17  
28  
33  
16  
13  
37  
33  
33  
18  
36  
23  
20  
27  
22  
18  
14  
16  
20  
28  
21  
14  
24

23  
26  
23  
25  
31  
28  
20  
30  
24  
35  
33  
30  
23  
29  
19  
26  
30  
21  
33  
27  
31  
24  
42  
31  
19  
23  
23  
26  
32  
19  
23  
27  
29  
18  
17  
27  
30  
30  
25  
24  
23  
21  
23  
21  
30  
18  
30  
21  
28  
31  
23  
10  
26  
20  
17  
23  
41  
16  
25

21  
28  
16  
31  
32  
24  
27  
19  
34  
12  
20  
20  
23  
25  
21  
30  
26  
28  
21  
29  
18  
28  
24  
25  
21  
21  
21  
19  
21  
28  
33  
24  
29  
25  
34  
15  
25  
32  
20  
22  
23  
19  
33  
24  
24  
39  
23  
29  
12  
18  
35  
26  
26  
33  
22  
32  
19  
41  
20



|    |    |
|----|----|
| 19 | 24 |
| 23 | 30 |
| 28 | 16 |
| 46 | 20 |
| 27 | 21 |
| 30 | 28 |
| 38 | 24 |
| 19 | 20 |
| 25 | 29 |
| 28 | 19 |
| 23 | 29 |
| 19 | 29 |
| 26 | 30 |
| 37 | 22 |
| 29 | 18 |
| 19 | 27 |
| 13 | 36 |
| 23 | 39 |
| 18 | 33 |
| 21 | 21 |
| 19 | 29 |
| 30 | 17 |
| 42 | 20 |
| 21 | 29 |
| 19 | 21 |
| 31 | 27 |
| 21 | 17 |
| 27 | 19 |
| 26 | 17 |
| 31 | 22 |
| 18 | 26 |
| 28 | 20 |
| 15 | 17 |
| 24 | 25 |
| 22 | 38 |
| 27 | 19 |
| 17 | 18 |
| 21 | 20 |
| 15 | 18 |
| 11 | 15 |
| 28 | 41 |
| 32 | 32 |
| 34 | 20 |
| 24 | 37 |
| 30 | 21 |
| 23 | 19 |
| 19 | 32 |
| 20 | 21 |
| 27 | 21 |
| 24 | 18 |
| 22 | 20 |
| 21 | 24 |
| 17 | 26 |
| 27 | 20 |
| 37 | 20 |
| 21 | 29 |
| 30 | 19 |
| 20 | 37 |
| 41 | 20 |

|    |    |
|----|----|
| 23 | 28 |
| 30 | 27 |
| 21 | 25 |
| 21 | 31 |
| 32 | 20 |
| 30 | 23 |
| 24 | 25 |
| 24 | 24 |
| 29 | 16 |
| 32 | 25 |
| 31 | 12 |
| 36 | 21 |
| 17 | 30 |
| 15 | 53 |
| 24 | 17 |
| 21 | 20 |
| 17 | 32 |
| 32 | 24 |
| 20 | 29 |
| 26 | 22 |
| 27 | 25 |
| 23 | 31 |
| 22 | 31 |
| 20 | 23 |
| 28 | 16 |
| 18 | 28 |
| 27 | 17 |
| 29 | 23 |
| 19 | 30 |
| 31 | 22 |
| 28 | 19 |
| 24 | 23 |
| 28 | 28 |
| 39 | 32 |
| 38 | 16 |
| 21 | 25 |
| 28 | 30 |
| 31 | 15 |
| 27 | 22 |
| 37 | 26 |
| 18 | 38 |
| 11 | 19 |
| 22 | 21 |
| 27 | 28 |
| 30 | 30 |
| 23 | 21 |
| 28 | 23 |
| 21 | 23 |
| 25 | 19 |
| 36 | 22 |
| 21 | 26 |
| 19 | 25 |
| 29 | 23 |
| 22 | 25 |
| 15 | 35 |
| 23 | 28 |
| 21 | 25 |
| 24 | 31 |
| 26 | 25 |

21  
24  
23  
26  
27  
19  
34  
38  
21  
30  
34  
33  
17  
19  
35  
31  
22  
35  
25  
25  
27  
24  
27  
35  
28  
33  
24  
18  
23  
25  
27  
30  
25  
29  
21  
44  
25  
34  
21  
29  
23  
33  
25  
23  
24  
37  
27  
30  
21  
20  
50  
31  
21  
17  
22  
22  
23  
35  
44

22  
22  
25  
34  
25  
25  
21  
18  
31  
31  
31  
24  
22  
25  
18  
25  
38  
16  
27  
19  
19  
22  
26  
23  
28  
29  
20  
35  
25  
21  
19  
27  
27  
23  
30  
21  
21  
19  
22  
32  
36  
23  
25  
21  
26  
24  
31  
25  
23  
30  
21  
21  
27  
23  
18  
23  
19  
28  
18

|    |    |
|----|----|
| 33 | 21 |
| 21 | 38 |
| 20 | 26 |
| 29 | 12 |
| 30 | 31 |
| 27 | 28 |
| 18 | 37 |
| 20 | 38 |
| 22 | 26 |
| 25 | 26 |
| 29 | 17 |
| 35 | 18 |
| 33 | 20 |
| 26 | 24 |
| 22 | 29 |
| 23 | 26 |
| 27 | 21 |
| 25 | 25 |
| 29 | 16 |
| 24 | 28 |
| 16 | 17 |
| 26 | 24 |
| 13 | 29 |
| 37 | 17 |
| 27 | 26 |
| 26 | 31 |
| 30 | 19 |
| 23 | 24 |
| 25 | 25 |
| 33 | 22 |
| 12 | 33 |
| 30 | 23 |
| 25 | 35 |
| 29 | 23 |
| 26 | 21 |
| 24 | 33 |
| 22 | 35 |
| 27 | 26 |
| 15 | 31 |
| 24 | 31 |
| 28 | 21 |
| 31 | 18 |
| 22 | 34 |
| 31 | 28 |
| 16 | 20 |
| 26 | 17 |
| 18 | 50 |
| 17 | 14 |
| 21 | 29 |
| 22 | 17 |
| 25 | 22 |
| 19 | 33 |
| 24 | 27 |
| 37 | 23 |
| 17 | 30 |
| 28 | 27 |
| 24 | 26 |
| 30 | 17 |
| 30 | 30 |

21  
22  
26  
19  
26  
23  
37  
27  
19  
21  
22  
28  
18  
20  
25  
28  
17  
37  
28  
28  
41  
31  
23  
30  
29  
43  
32  
25  
24  
23  
16  
21  
47  
21  
27  
30  
15  
14  
28  
23  
32  
26  
21  
22  
29  
13  
31  
20  
45  
16  
33  
32  
22  
30  
24  
29  
24  
26  
22

28  
23  
24  
28  
24  
24  
21  
21  
42  
29  
24  
32  
20  
27  
18  
30  
31  
16  
39  
20  
14  
25  
24  
41  
22  
22  
25  
20  
30  
27  
39  
30  
19  
24  
26  
21  
32  
33  
24  
28  
22  
26  
32  
26  
20  
35  
21  
34  
18  
29  
27  
26  
22  
22  
25  
16  
20  
18  
32

23  
17  
32  
23  
23  
32  
27  
34  
24  
27  
28  
20  
21  
23  
19  
26  
40  
31  
37

26  
30  
18  
19  
26  
21  
38  
23  
28  
24  
25  
32  
27  
23  
34  
24  
15  
29  
21



| 30                    | 31                     | 32                     |
|-----------------------|------------------------|------------------------|
| TGAGAACTGAATTCATAGGCT | TACCACAGGGTAGAACCCACGG | AAAAGCTGGGTTGAGAGGGCGA |
| miR-146b-5p           | miR-140-3p             | miR-320a               |
| 614674                | 605614                 | 549148                 |
| 0.03                  | 0.19                   | 0.17                   |
| 0.47                  | 0.02                   | 0.07                   |
| 0.14                  | 0.14                   | 0.12                   |
| 0.06                  | 0.20                   | 0.12                   |
| 0.21                  | 0.02                   | 0.11                   |
| 0.06                  | 0.08                   | 0.11                   |
| 0.01                  | 0.10                   | 0.20                   |
| 0.01                  | 0.08                   | 0.12                   |
| 0.09                  | 0.08                   | 0.08                   |
| 0.27                  | 0.08                   | 0.09                   |
| 0.80                  | 0.10                   | 0.04                   |
| 0.04                  | 0.07                   | 0.15                   |
| 0.18                  | 0.10                   | 0.07                   |
| 0.02                  | 0.10                   | 0.17                   |
| 0.06                  | 0.16                   | 0.16                   |
| 0.10                  | 0.13                   | 0.11                   |
| 0.05                  | 0.19                   | 0.19                   |
| 0.05                  | 0.14                   | 0.17                   |
| 0.16                  | 0.17                   | 0.07                   |
| 0.25                  | 0.17                   | 0.11                   |
| 0.07                  | 0.10                   | 0.13                   |
| 0.02                  | 0.19                   | 0.19                   |
| 0.03                  | 0.15                   | 0.25                   |
| 0.02                  | 0.13                   | 0.34                   |
| 0.06                  | 0.01                   | 0.13                   |
| 0.12                  | 0.09                   | 0.17                   |
| 0.12                  | 0.11                   | 0.09                   |
| 0.41                  | 0.11                   | 0.05                   |
| 0.61                  | 0.18                   | 0.05                   |
| 0.32                  | 0.09                   | 0.05                   |
| 0.03                  | 0.04                   | 0.17                   |
| 1.21                  | 0.04                   | 0.04                   |
| 0.15                  | 0.02                   | 0.09                   |
| 0.02                  | 0.15                   | 0.12                   |
| 0.02                  | 0.10                   | 0.12                   |
| 0.07                  | 0.17                   | 0.11                   |
| 0.00                  | 0.04                   | 0.17                   |
| 0.18                  | 0.17                   | 0.07                   |
| 0.17                  | 0.11                   | 0.06                   |
| 0.14                  | 0.11                   | 0.09                   |
| 0.06                  | 0.12                   | 0.38                   |
| 0.12                  | 0.24                   | 1.43                   |
| 0.04                  | 0.16                   | 0.12                   |
| 0.06                  | 0.17                   | 0.06                   |
| 0.06                  | 0.11                   | 0.13                   |
| 0.02                  | 0.07                   | 0.43                   |
| 0.21                  | 0.19                   | 0.07                   |
| 0.06                  | 0.15                   | 0.17                   |
| 0.05                  | 0.18                   | 0.12                   |
| 0.06                  | 0.22                   | 0.12                   |



|      |      |      |
|------|------|------|
| 0.12 | 0.17 | 0.10 |
| 0.03 | 0.19 | 0.21 |
| 0.02 | 0.17 | 0.20 |
| 0.08 | 0.16 | 0.15 |
| 0.03 | 0.13 | 0.15 |
| 0.03 | 0.19 | 0.16 |
| 0.05 | 0.15 | 0.14 |
| 0.32 | 0.09 | 0.09 |
| 0.13 | 0.07 | 0.26 |
| 0.15 | 0.04 | 0.21 |
| 0.26 | 0.04 | 0.19 |
| 0.22 | 0.06 | 0.08 |
| 0.03 | 0.09 | 0.19 |
| 0.07 | 0.07 | 0.13 |
| 0.25 | 0.10 | 0.12 |
| 0.11 | 0.10 | 0.36 |
| 0.13 | 0.18 | 0.07 |
| 0.37 | 0.03 | 0.07 |
| 0.06 | 0.07 | 0.37 |
| 0.19 | 0.12 | 0.15 |
| 0.05 | 0.18 | 0.12 |
| 0.21 | 0.11 | 0.02 |
| 0.08 | 0.11 | 0.10 |
| 0.30 | 0.11 | 0.10 |
| 0.01 | 0.18 | 1.74 |
| 0.08 | 0.10 | 0.18 |
| 0.30 | 0.13 | 0.06 |
| 0.28 | 0.06 | 0.06 |
| 0.29 | 0.25 | 0.10 |
| 0.21 | 0.14 | 0.06 |
| 0.04 | 0.13 | 0.14 |
| 0.16 | 0.13 | 0.11 |
| 0.03 | 0.11 | 0.14 |
| 0.41 | 0.16 | 0.10 |
| 0.27 | 0.12 | 0.07 |
| 0.06 | 0.17 | 0.15 |
| 0.11 | 0.22 | 0.11 |
| 0.05 | 0.18 | 0.13 |
| 0.27 | 0.20 | 0.07 |
| 0.09 | 0.16 | 0.11 |
| 0.68 | 0.08 | 0.20 |
| 0.03 | 0.17 | 0.09 |
| 0.04 | 0.18 | 0.17 |
| 0.21 | 0.07 | 0.07 |
| 0.12 | 0.09 | 0.12 |
| 0.00 | 0.00 | 0.00 |
| 0.00 | 0.00 | 0.00 |
| 0.00 | 0.00 | 0.00 |





31

32

33

---

*A\_15*

*A\_17*

*B\_30*

---

|       |       |       |
|-------|-------|-------|
| 0.25  |       |       |
| -0.02 | 0.07  |       |
| -0.07 | -0.29 | -0.17 |
| 0.00  | -0.17 | 0.02  |
| -0.33 | -0.25 | -0.24 |
| 0.44  | -0.20 | -0.18 |
| -0.20 | 0.18  | -0.21 |
| -0.25 | 0.19  | 0.01  |
| -0.47 | -0.17 | -0.10 |
| 0.05  | -0.23 | -0.16 |
| -0.01 | -0.19 | -0.15 |
| 0.05  | -0.24 | -0.22 |
| -0.19 | 0.16  | 0.03  |
| -0.01 | -0.05 | -0.27 |
| 0.08  | -0.29 | -0.19 |
| -0.38 | 0.06  | 0.23  |
| -0.21 | -0.24 | -0.34 |
| -0.26 | -0.28 | 0.04  |
| -0.32 | -0.32 | -0.21 |
| -0.28 | -0.06 | -0.06 |
| 0.31  | -0.04 | -0.16 |
| 0.43  | -0.06 | -0.09 |
| -0.35 | -0.25 | 0.20  |
| 0.03  | -0.12 | -0.28 |

|       |       |       |
|-------|-------|-------|
| 0.33  | -0.04 | -0.12 |
| 0.31  | 0.01  | -0.03 |
| -0.19 | 0.12  | 0.07  |
| -0.13 | -0.21 | -0.16 |
| -0.31 | -0.08 | 0.39  |
| -0.29 | -0.07 | 0.58  |
| -0.13 | 0.20  | 0.13  |
| 0.12  | -0.26 | -0.15 |
| -0.02 | -0.22 | -0.06 |
| -0.15 | 0.13  | 0.12  |
| 0.02  | 0.14  | -0.33 |
| -0.03 | 0.24  | 0.08  |
| 0.36  | 0.70  | 0.12  |
| 0.31  | -0.15 | 0.18  |
| -0.06 | -0.03 | 0.21  |
| 0.27  | -0.06 | -0.33 |
| -0.16 | 0.26  | 0.09  |
| -0.04 | 0.07  | 0.12  |
| -0.33 | -0.01 | 0.11  |
| 0.05  | -0.21 | -0.14 |
| -0.26 | -0.11 | -0.06 |
| -0.05 | 0.61  | -0.01 |
| 0.16  | 0.52  | -0.14 |
| -0.22 | 0.18  | 0.19  |
| -0.34 | 0.18  | 0.28  |
| 0.05  | -0.09 | 0.10  |
| -0.16 | 0.14  | 0.22  |
| -0.20 | -0.37 | -0.26 |
| -0.29 | 0.06  | 0.03  |
| -0.13 | 0.11  | 0.06  |
| -0.32 | -0.14 | 0.08  |
| -0.47 | -0.16 | -0.01 |
| -0.20 | -0.23 | 0.16  |
| -0.34 | 0.28  | -0.06 |
| -0.32 | -0.13 | 0.18  |
| -0.13 | 0.35  | 0.02  |
| 0.12  | 0.17  | -0.38 |
| -0.19 | -0.35 | -0.40 |
| -0.03 | 0.44  | 0.04  |
| 0.01  | 0.13  | -0.11 |

|                        |                        |                          |
|------------------------|------------------------|--------------------------|
| 29                     | 30                     | 31                       |
| 131                    | 132                    | 133                      |
| AATGCACCCGGGCAAGGATTCT | CCTGTTCTCCATTACTTGGCTC | CCCAGTGTTTCAGACTACCTGTTC |
| miR-501-3p             | miR-26b-3p             | miR-199a-5p              |
| 11405                  | 11100                  | 11007                    |
| -0.50                  | -0.35                  | -0.34                    |
| 3.21                   | -1.72                  | -0.42                    |
| 1.10                   | -0.62                  | -0.25                    |
| -0.41                  | -0.69                  | -1.00                    |
| -0.35                  | -0.58                  | -0.84                    |
| -0.76                  | 0.02                   | -0.20                    |
| -0.67                  | -0.64                  | -0.75                    |
| -0.41                  | 0.34                   | -1.14                    |
| -0.46                  | -1.16                  | -0.25                    |
| 0.04                   | -1.32                  | -0.80                    |
| -0.76                  | -0.95                  | 2.66                     |
| -0.65                  | 0.86                   | -1.06                    |
| -0.56                  | 2.27                   | 0.93                     |
| -0.22                  | -0.78                  | -0.60                    |
| -0.12                  | 0.14                   | 0.03                     |
| -0.12                  | 1.20                   | 2.67                     |
| 0.37                   | 0.27                   | 0.33                     |
| -0.64                  | 1.60                   | -0.96                    |
| -0.16                  | 0.73                   | -0.34                    |
| 2.52                   | 0.91                   | -0.08                    |

|       |       |       |
|-------|-------|-------|
| -0.07 | -0.73 | -0.18 |
| -0.22 | 1.83  | 0.08  |
| -0.35 | 0.06  | 0.50  |
| -0.42 | -1.05 | -0.47 |
| -0.64 | -0.25 | 0.18  |
| -0.53 | 0.23  | 0.68  |
| 1.79  | 0.38  | 1.62  |
| -0.29 | -0.88 | 2.05  |
| -0.05 | 1.54  | 1.23  |
| -0.01 | -1.02 | -0.20 |
| 0.83  | -1.49 | -1.12 |
| -0.63 | 0.10  | 1.36  |
| -0.76 | 1.95  | 0.79  |
| -0.61 | 0.32  | -0.82 |
| -0.42 | 0.71  | -0.89 |
| -0.56 | -0.27 | -0.56 |
| -0.61 | -1.64 | -1.39 |
| -0.67 | -0.36 | 0.16  |
| -0.27 | 1.08  | 1.75  |
| -0.49 | 1.10  | -0.19 |
| 2.77  | 1.35  | -0.54 |
| 2.67  | 4.10  | 4.25  |
| 0.03  | -0.14 | 1.35  |
| -0.51 | 1.29  | 0.08  |
| -0.54 | 2.78  | -0.86 |
| 1.20  | -0.33 | -1.53 |
| 0.02  | 0.87  | 1.79  |
| -0.34 | 0.78  | -0.08 |
| -0.24 | 0.55  | 0.09  |
| -0.19 | 0.17  | -0.49 |
| -0.34 | 1.61  | 1.41  |
| 1.63  | -0.19 | 1.74  |
| 2.03  | -0.94 | 0.73  |
| 1.55  | 1.43  | 2.06  |
| 0.30  | 0.22  | -0.56 |
| 2.79  | -0.84 | 0.23  |
| 0.58  | -0.08 | 0.42  |
| 0.92  | -0.20 | 0.66  |
| -0.55 | 0.52  | 0.28  |
| -0.71 | 2.99  | 1.59  |
| -0.76 | 1.83  | 0.37  |
| 1.92  | -0.63 | 0.48  |
| 5.07  | -0.15 | -0.67 |
| 3.01  | 0.43  | -0.37 |
| 2.10  | -0.83 | -0.17 |
| -0.67 | 2.28  | -0.46 |
| -0.38 | -0.05 | 0.36  |
| -0.25 | 0.18  | 0.19  |
| -0.69 | 0.67  | -0.48 |
| -0.68 | 4.25  | 0.55  |
| -0.52 | 0.84  | -0.72 |
| -0.69 | 5.37  | -1.25 |
| -0.06 | -0.31 | -0.66 |
| -0.46 | 1.75  | -0.47 |
| 4.14  | 2.19  | 0.17  |
| -0.58 | 1.31  | -0.19 |
| -0.38 | 0.48  | 0.08  |
| -0.23 | 2.42  | -0.99 |
| 0.16  | -0.37 | 2.25  |



|       |       |       |
|-------|-------|-------|
| 0.13  | 0.04  | 2.99  |
| 0.43  | -0.97 | 0.32  |
| -0.12 | 0.44  | 0.42  |
| -0.31 | 1.76  | -0.30 |
| 3.29  | 1.10  | 0.33  |
| 1.67  | -0.68 | -0.56 |
| -0.32 | 1.31  | 2.97  |
| -0.29 | 1.18  | -0.11 |
| -0.25 | 0.60  | -0.55 |
| 0.25  | 0.40  | -0.79 |
| 0.81  | 0.73  | 1.12  |
| -0.35 | -1.23 | -0.32 |
| -0.19 | -0.18 | -1.15 |
| -0.17 | 0.69  | -0.14 |
| 1.83  | -0.77 | 0.84  |
| 4.53  | 0.24  | 1.67  |

|      |      |      |
|------|------|------|
| -1   | 0    | -1   |
| 0.00 | 0.00 | 0.00 |
| 1.00 | 1.00 | 1.00 |
| 0.27 | 0.23 | 0.35 |

| 131                    | 132                    | 133                     |
|------------------------|------------------------|-------------------------|
| AATGCACCCGGGCAAGGATTCT | CCTGTTCTCCATTACTTGGCTC | CCCAGTGTTCAGACTACCTGTTC |
| miR-501-3p             | miR-26b-3p             | miR-199a-5p             |
| 11405                  | 11100                  | 11007                   |
| -0.50                  | -0.35                  | -0.34                   |
| 3.21                   | -1.72                  | -0.42                   |
| 1.10                   | -0.62                  | -0.25                   |
| -0.41                  | -0.69                  | -1.00                   |
| -0.35                  | -0.58                  | -0.84                   |
| -0.76                  | 0.02                   | -0.20                   |
| -0.67                  | -0.64                  | -0.75                   |
| -0.41                  | 0.34                   | -1.14                   |
| -0.46                  | -1.16                  | -0.25                   |
| 0.04                   | -1.32                  | -0.80                   |
| -0.76                  | -0.95                  | 2.66                    |
| -0.65                  | 0.86                   | -1.06                   |
| -0.56                  | 2.27                   | 0.93                    |
| -0.22                  | -0.78                  | -0.60                   |
| -0.12                  | 0.14                   | 0.03                    |
| -0.12                  | 1.20                   | 2.67                    |
| 0.37                   | 0.27                   | 0.33                    |
| -0.64                  | 1.60                   | -0.96                   |
| -0.16                  | 0.73                   | -0.34                   |
| 2.52                   | 0.91                   | -0.08                   |
| -0.07                  | -0.73                  | -0.18                   |
| -0.22                  | 1.83                   | 0.08                    |
| -0.35                  | 0.06                   | 0.50                    |
| -0.42                  | -1.05                  | -0.47                   |
| -0.64                  | -0.25                  | 0.18                    |
| -0.53                  | 0.23                   | 0.68                    |
| 1.79                   | 0.38                   | 1.62                    |
| -0.29                  | -0.88                  | 2.05                    |

|       |       |       |
|-------|-------|-------|
| -0.05 | 1.54  | 1.23  |
| -0.01 | -1.02 | -0.20 |
| 0.83  | -1.49 | -1.12 |
| -0.63 | 0.10  | 1.36  |
| -0.76 | 1.95  | 0.79  |
| -0.61 | 0.32  | -0.82 |
| -0.42 | 0.71  | -0.89 |
| -0.56 | -0.27 | -0.56 |
| -0.61 | -1.64 | -1.39 |
| -0.67 | -0.36 | 0.16  |
| -0.27 | 1.08  | 1.75  |
| -0.49 | 1.10  | -0.19 |
| 2.77  | 1.35  | -0.54 |
| 2.67  | 4.10  | 4.25  |
| 0.03  | -0.14 | 1.35  |
| -0.51 | 1.29  | 0.08  |
| -0.54 | 2.78  | -0.86 |
| 1.20  | -0.33 | -1.53 |
| 0.02  | 0.87  | 1.79  |
| -0.34 | 0.78  | -0.08 |
| -0.24 | 0.55  | 0.09  |
| -0.19 | 0.17  | -0.49 |
| -0.34 | 1.61  | 1.41  |
| 1.63  | -0.19 | 1.74  |
| 2.03  | -0.94 | 0.73  |
| 1.55  | 1.43  | 2.06  |
| 0.30  | 0.22  | -0.56 |
| 2.79  | -0.84 | 0.23  |
| 0.58  | -0.08 | 0.42  |
| 0.92  | -0.20 | 0.66  |
| -0.55 | 0.52  | 0.28  |
| -0.71 | 2.99  | 1.59  |
| -0.76 | 1.83  | 0.37  |
| 1.92  | -0.63 | 0.48  |
| 5.07  | -0.15 | -0.67 |
| 3.01  | 0.43  | -0.37 |
| 2.10  | -0.83 | -0.17 |
| -0.67 | 2.28  | -0.46 |
| -0.38 | -0.05 | 0.36  |
| -0.25 | 0.18  | 0.19  |
| -0.69 | 0.67  | -0.48 |
| -0.68 | 4.25  | 0.55  |
| -0.52 | 0.84  | -0.72 |
| -0.69 | 5.37  | -1.25 |
| -0.06 | -0.31 | -0.66 |
| -0.46 | 1.75  | -0.47 |
| 4.14  | 2.19  | 0.17  |
| -0.58 | 1.31  | -0.19 |
| -0.38 | 0.48  | 0.08  |
| -0.23 | 2.42  | -0.99 |
| 0.16  | -0.37 | 2.25  |
| 0.13  | 0.04  | 2.99  |
| 0.43  | -0.97 | 0.32  |
| -0.12 | 0.44  | 0.42  |
| -0.31 | 1.76  | -0.30 |
| 3.29  | 1.10  | 0.33  |
| 1.67  | -0.68 | -0.56 |
| -0.32 | 1.31  | 2.97  |
| -0.29 | 1.18  | -0.11 |

|       |       |       |
|-------|-------|-------|
| -0.25 | 0.60  | -0.55 |
| 0.25  | 0.40  | -0.79 |
| 0.81  | 0.73  | 1.12  |
| -0.35 | -1.23 | -0.32 |
| -0.19 | -0.18 | -1.15 |
| -0.17 | 0.69  | -0.14 |
| 1.83  | -0.77 | 0.84  |
| 4.53  | 0.24  | 1.67  |

---

|                        |                        |                   |
|------------------------|------------------------|-------------------|
| 131                    | 132                    | 133               |
| 67                     | 93                     | 107               |
| TGTAAACATCCTACACTCAGCT | GCTGACTCCTAGTCCAGGGCTC | ACCCCACTCCTGGTACC |
| miR-30b-5p             | miR-345-5p             | miR-4286          |
| 82798                  | 32906                  | 23822             |
| 0.64                   | 1.35                   | 1.23              |
| -0.89                  | -1.77                  | -1.16             |
| -0.45                  | -0.13                  | -1.17             |
| -0.52                  | 0.62                   | -1.14             |
| -0.18                  | -1.25                  | 2.46              |
| -0.72                  | -0.10                  | -0.88             |
| -0.47                  | 1.28                   | -0.14             |
| -0.61                  | 0.33                   | 0.97              |
| -0.71                  | -1.06                  | -1.28             |
| 0.46                   | -1.20                  | -0.78             |
| -0.11                  | -0.86                  | -0.54             |
| -0.47                  | 1.37                   | -0.42             |
| 3.84                   | 0.40                   | 0.65              |
| -0.66                  | -0.46                  | -0.31             |
| -0.42                  | 0.05                   | -0.35             |
| 0.82                   | 0.27                   | 0.21              |
| -0.28                  | 1.93                   | 0.06              |
| -0.07                  | -0.14                  | 1.82              |
| -0.06                  | -0.63                  | 0.08              |
| 2.06                   | 1.57                   | -0.38             |
| -0.40                  | -0.92                  | -0.82             |
| -0.53                  | 0.65                   | 0.43              |
| -0.29                  | 1.08                   | 0.17              |
| -0.41                  | -0.05                  | -0.14             |
| -0.63                  | -1.26                  | 1.54              |
| 0.17                   | -0.08                  | 1.08              |
| 0.87                   | -1.02                  | -1.18             |
| 0.85                   | -0.66                  | -1.19             |
| -0.31                  | 0.08                   | -0.35             |
| -0.67                  | -1.27                  | -0.90             |
| -0.80                  | -1.69                  | -0.93             |
| -0.05                  | -1.14                  | -0.14             |
| 0.13                   | -1.64                  | 2.83              |
| -0.38                  | 1.81                   | 1.84              |
| 1.87                   | -0.54                  | 4.22              |
| -0.45                  | 1.27                   | 0.21              |
| -0.81                  | -1.26                  | -1.15             |
| 2.90                   | -0.90                  | -0.78             |
| 4.35                   | -0.90                  | -0.17             |

|       |       |       |
|-------|-------|-------|
| -0.04 | 0.86  | 0.42  |
| -0.28 | 1.86  | 12.46 |
| 0.25  | 4.53  | 39.75 |
| -0.60 | -0.01 | 0.45  |
| 0.95  | -0.23 | 0.75  |
| -0.57 | -0.77 | 0.84  |
| -0.70 | 0.68  | 10.03 |
| 0.35  | 2.73  | 0.59  |
| -0.02 | 0.90  | 0.71  |
| 0.42  | 2.36  | 0.63  |
| 0.03  | 1.62  | 0.21  |
| 1.25  | 0.28  | 0.32  |
| -0.43 | 0.38  | 0.85  |
| -0.61 | -0.71 | 0.33  |
| 0.11  | 1.01  | 1.12  |
| -0.57 | -0.21 | -0.26 |
| -0.61 | -0.42 | -0.35 |
| -0.07 | -0.90 | -0.28 |
| 3.23  | -0.36 | -0.69 |
| -0.36 | 0.56  | -0.15 |
| 0.66  | -0.68 | 0.84  |
| 0.37  | -0.85 | 0.61  |
| 1.93  | -0.97 | -1.24 |
| -0.48 | -0.41 | -0.82 |
| -0.08 | -0.04 | -0.48 |
| -0.32 | -0.73 | -1.15 |
| -0.32 | -0.21 | -1.28 |
| 1.20  | -0.45 | -0.75 |
| -0.62 | -1.44 | 1.31  |
| -0.28 | -0.76 | -0.23 |
| 0.07  | 1.20  | 0.81  |
| -0.52 | 0.44  | -0.52 |
| 1.79  | -1.22 | -0.49 |
| -0.01 | -0.13 | -0.94 |
| 1.35  | 1.41  | 0.25  |
| -0.72 | 2.97  | 37.19 |
| 0.19  | 0.47  | -0.45 |
| -0.02 | -0.85 | -0.37 |
| -0.59 | -1.43 | -0.64 |
| 1.60  | 0.43  | -0.08 |
| 0.18  | 0.50  | -0.33 |
| -0.58 | 0.74  | -0.45 |
| 0.03  | 2.02  | -0.20 |
| 0.58  | 0.97  | 0.94  |
| 5.08  | 0.64  | 0.08  |
| 3.34  | 0.22  | -1.23 |
| 0.03  | 0.98  | 1.05  |
| 0.30  | 1.86  | 0.01  |
| -0.09 | 0.12  | -0.29 |
| 0.61  | 0.13  | -0.60 |
| -0.15 | 0.07  | -0.05 |
| -0.30 | -0.26 | -1.40 |
| -0.58 | -0.33 | -0.06 |
| -0.30 | 1.06  | 0.31  |
| -0.45 | -0.68 | -0.95 |
| 2.50  | -1.12 | -0.41 |
| 2.25  | 2.35  | 2.38  |
| 1.00  | 1.00  | 0.39  |













































































































































































|            | NP                                     | P     | UC    | NP     |
|------------|----------------------------------------|-------|-------|--------|
| mean       | 25.79                                  | 25.42 | 25.27 | 25.79  |
| sd         | 6.69                                   | 6.62  | 6.62  |        |
| gamma fits |                                        |       |       | beta f |
|            | NP                                     | P     | UC    | NP     |
|            | K-S                                    | K-S   | K-S   | K-S    |
|            | 0.02                                   | 0.02  | 0.02  | 0.02   |
|            | A-D                                    | A-D   | A-D   | A-D    |
|            | 0.05                                   | 0.05  | 0.20  | 0.05   |
|            | alpha                                  | alpha | alpha | alpha1 |
|            | 14.20                                  | 14.43 | 14.71 | 12.46  |
|            | beta                                   | beta  | beta  | alpha2 |
|            | 1.79                                   | 1.76  | 1.75  | ####   |
|            | p-val of ave                           |       |       | a      |
|            | 0.56                                   | 0.54  | 0.51  | 1.73   |
|            | relabel+reselect aves                  |       |       | b      |
|            | 25.79                                  | 25.42 | 25.27 | ####   |
|            | p-val of ave                           |       |       | p-val  |
|            | 0.56                                   | 0.54  | 0.51  | 0.56   |
|            | 0.44                                   | 0.46  | 0.49  | observ |
|            | NP                                     | P     | UC    | 25.79  |
|            | obs: no relabel but reselect           |       |       | p-val  |
|            | 43.20                                  | 33.67 | 18.85 | 0.56   |
|            | p-val of observed ave of only reselect |       |       | 0.44   |
|            | 0.99                                   | 0.89  | 0.15  | NP     |
|            | 0.01                                   | 0.11  | 0.85  | obs: n |
|            |                                        |       |       | 43.20  |
|            |                                        |       |       | p-val  |
|            |                                        |       |       | 0.99   |
|            |                                        |       |       | 0.01   |





























































| 33                      | 34                 | 35                     | 36                 |
|-------------------------|--------------------|------------------------|--------------------|
| TTTGCAATGGTAGAACTCACACT | TCGAGGAGCTCACAGTCT | TCAGTGCATCACAGAACTTTGT | TGTAAACATCCTACACTC |
| miR-182-5p              | miR-151b           | miR-148b-3p            | miR-30c-5p         |
| 501331                  | 500966             | 497718                 | #####              |
| 0.04                    | 0.06               | 0.11                   | 0.07               |
| 0.42                    | 0.17               | 0.04                   | 0.05               |
| 0.17                    | 0.19               | 0.07                   | 0.08               |
| 0.09                    | 0.09               | 0.07                   | 0.05               |
| 0.04                    | 0.26               | 0.04                   | 0.11               |
| 0.01                    | 0.08               | 0.13                   | 0.04               |
| 0.03                    | 0.07               | 0.17                   | 0.04               |
| 0.02                    | 0.03               | 0.07                   | 0.07               |
| 0.13                    | 0.11               | 0.07                   | 0.07               |
| 0.22                    | 0.10               | 0.07                   | 0.07               |
| 0.28                    | 0.19               | 0.13                   | 0.10               |
| 0.02                    | 0.06               | 0.05                   | 0.08               |
| 0.10                    | 0.12               | 0.11                   | 0.20               |
| 0.03                    | 0.05               | 0.05                   | 0.04               |
| 0.15                    | 0.10               | 0.07                   | 0.10               |
| 0.14                    | 0.17               | 0.12                   | 0.16               |
| 0.03                    | 0.07               | 0.14                   | 0.09               |
| 0.10                    | 0.10               | 0.06                   | 0.08               |
| 0.17                    | 0.07               | 0.11                   | 0.16               |
| 0.20                    | 0.14               | 0.07                   | 0.18               |
| 0.13                    | 0.13               | 0.17                   | 0.05               |
| 0.05                    | 0.08               | 0.17                   | 0.10               |
| 0.05                    | 0.10               | 0.15                   | 0.08               |
| 0.03                    | 0.07               | 0.12                   | 0.05               |
| 0.04                    | 0.12               | 0.08                   | 0.08               |
| 0.03                    | 0.09               | 0.17                   | 0.11               |
| 0.32                    | 0.10               | 0.14                   | 0.13               |
| 0.27                    | 0.19               | 0.06                   | 0.06               |
| 0.10                    | 0.12               | 0.15                   | 0.10               |
| 0.25                    | 0.09               | 0.09                   | 0.05               |
| 0.16                    | 0.10               | 0.14                   | 0.02               |
| 0.54                    | 0.17               | 0.14                   | 0.11               |
| 0.05                    | 0.33               | 0.03                   | 0.17               |
| 0.05                    | 0.03               | 0.09                   | 0.10               |
| 0.12                    | 0.04               | 0.06                   | 0.14               |
| 0.01                    | 0.06               | 0.11                   | 0.11               |
| 0.01                    | 0.02               | 0.03                   | 0.01               |
| 0.11                    | 0.05               | 0.09                   | 0.13               |
| 0.19                    | 0.08               | 0.09                   | 0.13               |
| 0.03                    | 0.07               | 0.06                   | 0.15               |
| 0.06                    | 0.06               | 0.34                   | 0.05               |
| 0.08                    | 0.09               | 0.43                   | 0.05               |
| 0.02                    | 0.12               | 0.16                   | 0.06               |
| 0.14                    | 0.08               | 0.15                   | 0.15               |
| 0.03                    | 0.06               | 0.07                   | 0.12               |
| 0.03                    | 0.04               | 0.16                   | 0.02               |
| 0.08                    | 0.19               | 0.14                   | 0.27               |
| 0.05                    | 0.12               | 0.16                   | 0.14               |
| 0.13                    | 0.13               | 0.07                   | 0.22               |
| 0.06                    | 0.10               | 0.08                   | 0.19               |

|      |      |      |      |
|------|------|------|------|
| 0.08 | 0.13 | 0.13 | 0.20 |
| 0.02 | 0.15 | 0.28 | 0.06 |
| 0.07 | 0.16 | 0.23 | 0.04 |
| 0.04 | 0.17 | 0.18 | 0.16 |
| 0.06 | 0.11 | 0.16 | 0.07 |
| 0.01 | 0.12 | 0.16 | 0.05 |
| 0.07 | 0.15 | 0.17 | 0.10 |
| 0.25 | 0.08 | 0.07 | 0.11 |
| 0.03 | 0.07 | 0.14 | 0.10 |
| 0.08 | 0.14 | 0.13 | 0.24 |
| 0.10 | 0.15 | 0.08 | 0.21 |
| 0.35 | 0.12 | 0.07 | 0.10 |
| 0.07 | 0.06 | 0.11 | 0.07 |
| 0.09 | 0.08 | 0.12 | 0.11 |
| 0.04 | 0.13 | 0.10 | 0.09 |
| 0.40 | 0.10 | 0.07 | 0.06 |
| 0.13 | 0.09 | 0.10 | 0.07 |
| 0.25 | 0.15 | 0.10 | 0.05 |
| 0.11 | 0.27 | 0.07 | 0.09 |
| 0.12 | 0.18 | 0.10 | 0.18 |
| 0.04 | 0.06 | 0.11 | 0.07 |
| 0.32 | 0.02 | 0.07 | 0.16 |
| 0.14 | 0.10 | 0.08 | 0.09 |
| 0.14 | 0.10 | 0.05 | 0.17 |
| 0.01 | 0.05 | 0.08 | 0.01 |
| 0.07 | 0.10 | 0.10 | 0.11 |
| 0.20 | 0.09 | 0.09 | 0.12 |
| 0.23 | 0.07 | 0.09 | 0.07 |
| 0.09 | 0.20 | 0.15 | 0.17 |
| 0.12 | 0.20 | 0.14 | 0.20 |
| 0.06 | 0.14 | 0.13 | 0.08 |
| 0.06 | 0.19 | 0.17 | 0.13 |
| 0.02 | 0.10 | 0.09 | 0.20 |
| 0.18 | 0.13 | 0.06 | 0.19 |
| 0.27 | 0.17 | 0.06 | 0.08 |
| 0.02 | 0.15 | 0.09 | 0.19 |
| 0.04 | 0.13 | 0.13 | 0.16 |
| 0.09 | 0.19 | 0.11 | 0.12 |
| 0.15 | 0.09 | 0.12 | 0.18 |
| 0.04 | 0.16 | 0.13 | 0.14 |
| 0.47 | 0.12 | 0.09 | 0.05 |
| 0.03 | 0.05 | 0.17 | 0.05 |
| 0.02 | 0.08 | 0.17 | 0.08 |
| 0.16 | 0.10 | 0.21 | 0.09 |
| 0.19 | 0.09 | 0.27 | 0.08 |
| 0.00 | 0.00 | 0.00 | 0.00 |
| 0.00 | 0.00 | 0.00 | 0.00 |
| 0.00 | 0.00 | 0.00 | 0.00 |







34

35

36

37

38

39

---

*B\_33*

*C\_2*

*C\_37*

*C\_38*

*C\_39*

*C\_43*

---

|       |       |       |       |             |
|-------|-------|-------|-------|-------------|
| 0.61  |       |       |       |             |
| 0.24  | 0.02  |       |       |             |
| 0.10  | -0.02 | -0.12 |       |             |
| 0.04  | 0.21  | 0.16  | -0.30 |             |
| -0.03 | 0.25  | -0.06 | -0.33 | 0.55        |
| 0.17  | 0.10  | 0.54  | -0.31 | 0.18 0.09   |
| 0.37  | 0.52  | 0.11  | 0.03  | -0.05 -0.08 |
| 0.21  | 0.39  | 0.12  | -0.01 | -0.02 0.02  |
| 0.21  | 0.25  | 0.16  | -0.09 | -0.09 -0.19 |
| 0.13  | 0.29  | -0.17 | -0.36 | 0.50 0.50   |
| 0.24  | 0.23  | 0.20  | 0.17  | -0.03 -0.24 |
| 0.31  | 0.36  | 0.04  | 0.21  | -0.19 -0.23 |
| 0.08  | -0.06 | 0.11  | -0.47 | 0.01 0.13   |
| 0.42  | 0.04  | 0.40  | -0.19 | 0.06 -0.22  |
| 0.23  | 0.16  | -0.02 | -0.13 | -0.10 0.03  |
| 0.23  | 0.00  | 0.43  | -0.28 | 0.09 -0.06  |
| -0.11 | -0.09 | 0.07  | -0.38 | 0.16 0.14   |
| 0.02  | -0.03 | 0.09  | -0.14 | -0.02 -0.23 |
| 0.02  | 0.04  | -0.14 | 0.07  | -0.13 -0.29 |
| 0.08  | 0.12  | 0.22  | -0.45 | 0.02 0.02   |
| 0.14  | -0.19 | 0.30  | 0.32  | -0.22 -0.41 |

|       |       |       |       |       |       |
|-------|-------|-------|-------|-------|-------|
| -0.08 | -0.09 | 0.00  | -0.01 | -0.17 | -0.35 |
| -0.23 | -0.22 | -0.15 | -0.03 | 0.04  | -0.19 |
| -0.28 | -0.19 | -0.22 | -0.08 | 0.02  | 0.38  |
| 0.06  | 0.00  | 0.50  | -0.13 | -0.03 | -0.25 |
| -0.09 | -0.02 | 0.18  | -0.37 | -0.01 | 0.05  |
| -0.14 | 0.00  | 0.11  | -0.34 | -0.07 | 0.05  |
| -0.32 | -0.22 | -0.32 | -0.07 | 0.01  | 0.32  |
| 0.06  | 0.08  | -0.11 | 0.26  | -0.30 | -0.25 |
| -0.26 | -0.31 | -0.05 | 0.12  | -0.21 | -0.27 |
| -0.37 | -0.28 | -0.28 | -0.15 | -0.08 | 0.17  |
| 0.00  | -0.07 | -0.05 | 0.11  | 0.18  | 0.15  |
| -0.14 | 0.07  | -0.29 | -0.17 | 0.28  | 0.46  |
| -0.12 | 0.02  | -0.09 | -0.11 | 0.15  | 0.05  |
| -0.08 | 0.04  | -0.10 | 0.23  | -0.26 | -0.20 |
| 0.13  | 0.15  | 0.07  | -0.31 | -0.04 | 0.05  |
| 0.28  | 0.06  | 0.10  | 0.30  | 0.09  | -0.11 |
| -0.09 | -0.10 | -0.03 | -0.14 | 0.30  | 0.14  |
| -0.23 | -0.13 | -0.25 | 0.09  | 0.14  | 0.16  |
| 0.07  | 0.26  | -0.01 | -0.21 | 0.25  | 0.40  |
| 0.25  | 0.43  | 0.10  | 0.05  | -0.09 | -0.04 |
| -0.21 | -0.30 | 0.07  | -0.14 | 0.17  | 0.17  |
| -0.10 | 0.11  | 0.00  | -0.38 | 0.45  | 0.34  |
| -0.20 | -0.22 | -0.12 | 0.03  | 0.19  | -0.14 |
| -0.16 | -0.04 | -0.14 | -0.44 | 0.10  | 0.44  |
| -0.19 | -0.19 | -0.11 | -0.45 | 0.00  | 0.22  |
| 0.01  | -0.01 | -0.12 | -0.04 | -0.37 | -0.15 |
| -0.20 | -0.26 | 0.08  | -0.44 | -0.05 | 0.01  |
| 0.28  | 0.07  | 0.27  | 0.10  | -0.07 | -0.24 |
| -0.14 | -0.08 | -0.11 | -0.17 | 0.19  | 0.50  |
| -0.24 | -0.18 | -0.24 | -0.02 | 0.02  | 0.31  |
| 0.23  | 0.19  | 0.21  | -0.25 | -0.03 | 0.08  |
| 0.11  | -0.10 | 0.34  | -0.47 | 0.10  | 0.07  |
| -0.04 | -0.10 | 0.20  | -0.13 | -0.07 | -0.10 |
| -0.02 | -0.11 | 0.06  | -0.37 | 0.40  | 0.34  |
| 0.00  | -0.01 | 0.33  | -0.33 | -0.08 | 0.00  |
| -0.29 | -0.31 | -0.17 | -0.13 | 0.12  | 0.23  |
| 0.12  | -0.05 | 0.16  | 0.03  | 0.24  | -0.08 |
| 0.23  | -0.08 | 0.36  | 0.00  | -0.14 | -0.38 |
| -0.28 | -0.24 | -0.28 | -0.25 | 0.07  | 0.23  |
| -0.19 | 0.08  | -0.17 | -0.25 | 0.32  | 0.30  |

|                        |                       |                         |
|------------------------|-----------------------|-------------------------|
| 32                     | 33                    | 34                      |
| 134                    | 135                   | 136                     |
| CACGCTCATGCACACACCCACA | TCGACCGGACCTCGACCGGCT | AACATTCATTGTTGTCGGTGGGT |
| miR-574-3p             | miR-1307-5p           | miR-181d                |
| 10799.00               | 10674.00              | 10591.00                |
| 0.38                   | 1.73                  | -0.30                   |
| 0.14                   | -0.86                 | -2.01                   |
| -0.52                  | 0.40                  | -1.01                   |
| -0.57                  | 0.00                  | -1.41                   |
| 4.45                   | -0.86                 | 0.11                    |
| -0.33                  | -0.40                 | 1.20                    |
| 0.07                   | -0.19                 | 2.09                    |
| -0.43                  | -0.55                 | -0.45                   |
| -0.33                  | -0.66                 | -1.03                   |
| 0.30                   | -0.62                 | 0.06                    |
| -0.62                  | -0.47                 | 0.61                    |
| -0.95                  | -0.62                 | -0.61                   |
| 0.59                   | 3.76                  | 1.09                    |
| -0.28                  | -0.65                 | -0.26                   |
| -0.22                  | -0.33                 | 0.37                    |
| -0.35                  | 0.91                  | 1.71                    |
| 0.70                   | -0.24                 | -0.03                   |
| 0.99                   | 0.06                  | -0.15                   |
| -0.33                  | -0.28                 | 0.60                    |
| -0.38                  | 1.46                  | -0.52                   |

|       |       |       |
|-------|-------|-------|
| -0.58 | -0.45 | 0.10  |
| 0.03  | -0.37 | 0.32  |
| -0.04 | -0.33 | 0.17  |
| -0.17 | -0.24 | -0.18 |
| -0.36 | -0.71 | -1.77 |
| -0.30 | -0.23 | 1.62  |
| -0.88 | 0.75  | -0.34 |
| -0.70 | 3.75  | -0.93 |
| -0.58 | 1.44  | -0.84 |
| -0.79 | -0.50 | -0.68 |
| -0.30 | -0.86 | -1.24 |
| -0.53 | -0.53 | -0.22 |
| 2.24  | -0.46 | -0.78 |
| 0.15  | -0.46 | 0.36  |
| 0.16  | -0.37 | 1.97  |
| 0.15  | -0.15 | 0.06  |
| -0.73 | -0.82 | -1.54 |
| 0.70  | -0.36 | 1.42  |
| 0.21  | 0.89  | 3.90  |
| -0.47 | -0.29 | 0.55  |
| 6.01  | 3.68  | 0.53  |
| 14.50 | 23.08 | 7.55  |
| -0.39 | -0.43 | 1.04  |
| 0.80  | 0.57  | 1.99  |
| -0.48 | -0.62 | -0.13 |
| 5.29  | 1.27  | -0.09 |
| 0.28  | 1.23  | 1.16  |
| -0.08 | 0.27  | 0.47  |
| -0.21 | -0.12 | -0.52 |
| -0.19 | -0.02 | 0.01  |
| -0.19 | 0.51  | -0.03 |
| 0.58  | -0.17 | 0.94  |
| 0.41  | -0.57 | -0.12 |
| 0.55  | 0.04  | 1.11  |
| -0.55 | -0.28 | -0.29 |
| 0.13  | -0.60 | -0.41 |
| -0.35 | -0.13 | -0.11 |
| -0.92 | 3.36  | 0.22  |
| -0.48 | -0.40 | 0.17  |
| -0.35 | -0.21 | 0.76  |
| -0.12 | -0.54 | 0.10  |
| -0.84 | 1.84  | -0.88 |
| -0.38 | -0.34 | -0.99 |
| -0.90 | 0.08  | -1.26 |
| -0.84 | 0.00  | -0.81 |
| -0.82 | -0.26 | 1.10  |
| -0.30 | 2.98  | -1.15 |
| 0.82  | -0.86 | -2.01 |
| 0.27  | -0.36 | -0.96 |
| 0.46  | 1.70  | 0.96  |
| -0.39 | -0.23 | -0.43 |
| -0.61 | -0.36 | -1.87 |
| -0.56 | -0.31 | -0.68 |
| -0.49 | -0.14 | -0.02 |
| 8.27  | 12.56 | 2.86  |
| -0.51 | 0.48  | 0.80  |
| -0.76 | -0.53 | 0.99  |
| -0.71 | -0.72 | -0.24 |
| 0.35  | 2.73  | 0.97  |

|       |       |       |
|-------|-------|-------|
| 0.09  | 0.56  | 0.70  |
| 0.60  | -0.32 | -0.37 |
| -0.01 | 0.20  | 0.20  |
| -0.53 | -0.08 | -0.06 |
| -0.14 | 1.18  | 0.33  |
| -0.74 | 3.22  | -1.15 |
| 0.77  | 0.05  | 0.29  |
| -0.12 | 0.87  | 0.51  |
| -0.32 | -0.14 | -0.55 |
| -0.09 | 0.31  | 0.42  |
| 0.58  | -0.15 | 0.01  |
| -0.87 | -0.22 | 0.57  |
| -0.48 | -0.40 | 0.00  |
| 0.22  | 0.54  | 0.19  |
| -0.84 | -0.11 | 0.01  |
| -0.31 | 0.69  | 2.46  |
| 0.11  | -1.40 | -1.59 |
| 0.00  | 0.00  | 0.00  |
| 1.00  | 1.00  | 1.00  |
| 0.42  | 0.90  | 0.38  |

---

| 134                    | 135                   | 136                     |
|------------------------|-----------------------|-------------------------|
| CACGCTCATGCACACACCCACA | TCGACCGGACCTCGACCGGCT | AACATTCATTGTTGTCGGTGGGT |
| miR-574-3p             | miR-1307-5p           | miR-181d                |
| 10799                  | 10674                 | 10591                   |
| 0.38                   | 1.73                  | -0.30                   |
| 0.14                   | -0.86                 | -2.01                   |
| -0.52                  | 0.40                  | -1.01                   |
| -0.57                  | 0.00                  | -1.41                   |
| 4.45                   | -0.86                 | 0.11                    |
| -0.33                  | -0.40                 | 1.20                    |
| 0.07                   | -0.19                 | 2.09                    |
| -0.43                  | -0.55                 | -0.45                   |
| -0.33                  | -0.66                 | -1.03                   |
| 0.30                   | -0.62                 | 0.06                    |
| -0.62                  | -0.47                 | 0.61                    |
| -0.95                  | -0.62                 | -0.61                   |
| 0.59                   | 3.76                  | 1.09                    |
| -0.28                  | -0.65                 | -0.26                   |
| -0.22                  | -0.33                 | 0.37                    |
| -0.35                  | 0.91                  | 1.71                    |
| 0.70                   | -0.24                 | -0.03                   |
| 0.99                   | 0.06                  | -0.15                   |
| -0.33                  | -0.28                 | 0.60                    |
| -0.38                  | 1.46                  | -0.52                   |
| -0.58                  | -0.45                 | 0.10                    |
| 0.03                   | -0.37                 | 0.32                    |
| -0.04                  | -0.33                 | 0.17                    |
| -0.17                  | -0.24                 | -0.18                   |
| -0.36                  | -0.71                 | -1.77                   |
| -0.30                  | -0.23                 | 1.62                    |
| -0.88                  | 0.75                  | -0.34                   |
| -0.70                  | 3.75                  | -0.93                   |

|       |       |       |
|-------|-------|-------|
| -0.58 | 1.44  | -0.84 |
| -0.79 | -0.50 | -0.68 |
| -0.30 | -0.86 | -1.24 |
| -0.53 | -0.53 | -0.22 |
| 2.24  | -0.46 | -0.78 |
| 0.15  | -0.46 | 0.36  |
| 0.16  | -0.37 | 1.97  |
| 0.15  | -0.15 | 0.06  |
| -0.73 | -0.82 | -1.54 |
| 0.70  | -0.36 | 1.42  |
| 0.21  | 0.89  | 3.90  |
| -0.47 | -0.29 | 0.55  |
| 6.01  | 3.68  | 0.53  |
| 14.50 | 23.08 | 7.55  |
| -0.39 | -0.43 | 1.04  |
| 0.80  | 0.57  | 1.99  |
| -0.48 | -0.62 | -0.13 |
| 5.29  | 1.27  | -0.09 |
| 0.28  | 1.23  | 1.16  |
| -0.08 | 0.27  | 0.47  |
| -0.21 | -0.12 | -0.52 |
| -0.19 | -0.02 | 0.01  |
| -0.19 | 0.51  | -0.03 |
| 0.58  | -0.17 | 0.94  |
| 0.41  | -0.57 | -0.12 |
| 0.55  | 0.04  | 1.11  |
| -0.55 | -0.28 | -0.29 |
| 0.13  | -0.60 | -0.41 |
| -0.35 | -0.13 | -0.11 |
| -0.92 | 3.36  | 0.22  |
| -0.48 | -0.40 | 0.17  |
| -0.35 | -0.21 | 0.76  |
| -0.12 | -0.54 | 0.10  |
| -0.84 | 1.84  | -0.88 |
| -0.38 | -0.34 | -0.99 |
| -0.90 | 0.08  | -1.26 |
| -0.84 | 0.00  | -0.81 |
| -0.82 | -0.26 | 1.10  |
| -0.30 | 2.98  | -1.15 |
| 0.82  | -0.86 | -2.01 |
| 0.27  | -0.36 | -0.96 |
| 0.46  | 1.70  | 0.96  |
| -0.39 | -0.23 | -0.43 |
| -0.61 | -0.36 | -1.87 |
| -0.56 | -0.31 | -0.68 |
| -0.49 | -0.14 | -0.02 |
| 8.27  | 12.56 | 2.86  |
| -0.51 | 0.48  | 0.80  |
| -0.76 | -0.53 | 0.99  |
| -0.71 | -0.72 | -0.24 |
| 0.35  | 2.73  | 0.97  |
| 0.09  | 0.56  | 0.70  |
| 0.60  | -0.32 | -0.37 |
| -0.01 | 0.20  | 0.20  |
| -0.53 | -0.08 | -0.06 |
| -0.14 | 1.18  | 0.33  |
| -0.74 | 3.22  | -1.15 |
| 0.77  | 0.05  | 0.29  |
| -0.12 | 0.87  | 0.51  |

|       |       |       |
|-------|-------|-------|
| -0.32 | -0.14 | -0.55 |
| -0.09 | 0.31  | 0.42  |
| 0.58  | -0.15 | 0.01  |
| -0.87 | -0.22 | 0.57  |
| -0.48 | -0.40 | 0.00  |
| 0.22  | 0.54  | 0.19  |
| -0.84 | -0.11 | 0.01  |
| -0.31 | 0.69  | 2.46  |

---

|                        |                       |                        |
|------------------------|-----------------------|------------------------|
| 134                    | 135                   | 136                    |
| 69                     | 53                    | 113                    |
| TGGCTCAGTTCAGCAGGAACAG | AATGGCGCCACTAGGGTTGTG | GTCCAGTTTTCCAGGAATCCCT |
| miR-24-3p              | miR-652-3p            | miR-145-5p             |
| 78156                  | 143334                | 20235                  |
| 0.04                   | 2.20                  | 1.29                   |
| 0.17                   | 0.05                  | -1.36                  |
| -0.36                  | -0.25                 | -0.50                  |
| -0.38                  | -0.49                 | -0.60                  |
| 1.53                   | 1.26                  | -0.24                  |
| -1.10                  | -0.85                 | -1.07                  |
| -0.71                  | -0.38                 | -0.22                  |
| -0.94                  | -0.64                 | 0.54                   |
| -1.07                  | -1.34                 | -0.77                  |
| -0.09                  | 0.17                  | -0.92                  |
| -0.03                  | -1.24                 | -0.71                  |
| -0.96                  | -2.15                 | -0.88                  |
| 3.38                   | 0.09                  | 1.49                   |
| -0.73                  | -0.53                 | 0.50                   |
| 0.21                   | 0.56                  | -0.06                  |
| 0.40                   | 0.05                  | -0.32                  |
| 0.11                   | 1.12                  | 0.83                   |
| 0.28                   | 1.82                  | 0.22                   |
| 0.76                   | 0.80                  | 2.10                   |
| 2.03                   | -1.00                 | -0.52                  |
| -0.57                  | -0.70                 | -0.99                  |
| -0.22                  | -0.56                 | -0.01                  |
| -0.34                  | 0.49                  | -0.08                  |
| -0.44                  | 1.04                  | -0.75                  |
| -0.65                  | 0.41                  | 0.51                   |
| 0.39                   | 0.72                  | 2.78                   |
| -0.69                  | -0.61                 | -0.27                  |
| -0.10                  | -1.78                 | -0.80                  |
| -0.30                  | -0.81                 | -0.30                  |
| -0.30                  | -0.29                 | -0.32                  |
| -1.09                  | 1.85                  | -0.88                  |
| 0.01                   | 0.14                  | -0.97                  |
| 1.63                   | 0.63                  | 0.19                   |
| 0.33                   | 0.02                  | 2.55                   |
| 3.37                   | 3.90                  | 8.36                   |
| -0.04                  | -1.21                 | 0.31                   |
| -1.41                  | -1.77                 | -1.19                  |
| 0.73                   | -0.06                 | 1.23                   |
| 2.86                   | 1.03                  | 2.63                   |



|       |       |       |
|-------|-------|-------|
| 0.14  | -1.03 | 0.24  |
| 4.04  | 8.39  | 9.01  |
| 9.21  | 28.19 | 18.44 |
| 0.42  | 0.57  | 1.13  |
| 2.26  | 2.20  | 1.89  |
| -0.96 | -0.32 | 1.54  |
| 0.38  | 6.32  | 1.13  |
| 2.15  | -0.61 | 0.21  |
| 0.20  | -0.23 | -0.04 |
| 0.64  | -0.12 | 0.07  |
| 0.68  | -0.21 | -0.42 |
| 0.94  | -0.32 | -0.45 |
| 0.19  | 0.57  | 0.23  |
| 0.13  | 0.90  | 0.17  |
| 2.62  | 0.80  | 1.06  |
| -0.87 | -1.33 | -1.05 |
| -0.15 | 0.42  | -0.07 |
| -0.60 | 0.02  | -0.72 |
| 0.66  | -1.10 | -0.81 |
| -0.36 | 0.24  | 1.63  |
| 0.29  | 1.20  | 1.23  |
| 1.73  | 0.66  | 1.52  |
| -0.75 | -1.50 | -0.70 |
| -0.96 | 0.44  | 0.89  |
| -0.93 | -0.76 | -0.49 |
| -0.34 | -0.83 | -0.63 |
| -0.29 | -1.46 | -0.36 |
| 0.11  | 1.19  | -0.18 |
| -0.34 | 3.19  | -0.55 |
| 0.53  | 0.96  | 1.38  |
| 2.33  | 0.63  | 1.99  |
| -0.55 | -1.14 | -0.03 |
| -0.27 | -1.92 | -0.52 |
| -0.29 | -0.82 | -0.88 |
| 4.27  | -0.19 | 0.83  |
| 0.26  | 36.59 | 23.97 |
| -0.40 | -0.72 | -0.61 |
| 0.44  | 0.87  | 0.80  |
| -1.22 | -1.49 | -1.03 |
| 2.70  | 0.12  | -0.37 |
| 1.54  | -0.83 | -0.53 |
| -0.27 | 0.69  | -0.85 |
| 0.54  | -0.49 | -0.57 |
| -0.31 | -1.72 | 0.21  |
| 2.41  | -0.81 | 0.03  |
| 0.95  | -1.72 | -1.15 |
| 0.53  | -0.60 | 1.63  |
| 1.32  | -0.82 | -0.04 |
| 0.13  | -0.57 | -0.46 |
| 1.14  | -1.06 | -0.10 |
| 1.19  | -0.28 | 0.54  |
| 0.11  | -1.49 | -1.14 |
| -0.67 | -1.06 | -0.44 |
| 0.23  | -0.53 | -0.13 |
| -0.64 | -0.60 | -0.40 |
| -0.57 | 2.02  | 1.03  |
| 3.04  | 3.88  | 5.81  |
| 0.82  | 0.99  | 0.53  |











































































































































































|                         |        |               |           |     |    |    |
|-------------------------|--------|---------------|-----------|-----|----|----|
| P                       | UC     | reselects     | reselects | UC  | NP | P  |
| 25.42                   | 25.27  | typicatypical | typical P | 43  | 28 | 18 |
|                         |        | 43.19         | 33.63     | ### |    |    |
| fits                    |        |               |           | 43  | 28 | 18 |
| P                       | UC     |               |           | 42  | 30 | 19 |
| K-S                     | K-S    |               |           | 43  | 35 | 19 |
| 0.02                    | 0.02   |               |           | 38  | 28 | 18 |
| A-D                     | A-D    |               |           | 40  | 30 | 18 |
| 0.20                    | 0.20   |               |           | 43  | 32 | 18 |
| alpha1                  | alpha1 |               |           | 43  | 28 | 19 |
| 9.99                    | 13.46  |               |           | 44  | 25 | 18 |
| alpha2                  | alpha2 |               |           | 40  | 32 | 17 |
| #####                   | #####  |               |           | 43  | 31 | 15 |
| a                       | a      |               |           | 43  | 40 | 20 |
| 3.21                    | 0.01   |               |           | 40  | 29 | 14 |
| b                       | b      |               |           | 44  | 29 | 18 |
| #####                   | #####  |               |           | 43  | 34 | 20 |
| of ave                  |        |               |           | 41  | 33 | 19 |
| 0.54                    | 0.51   |               |           | 42  | 33 | 16 |
| red ave                 |        |               |           | 42  | 28 | 18 |
| 25.42                   | 25.27  |               |           | 42  | 31 | 19 |
| of observed ave         |        |               |           | 37  | 31 | 19 |
| 0.54                    | 0.51   |               |           | 40  | 34 | 17 |
| 0.46                    | 0.49   |               |           | 39  | 34 | 21 |
| P                       | UC     |               |           | 41  | 33 | 19 |
| no relabel but reselect |        |               |           | 44  | 33 | 22 |
| 33.67                   | 18.85  |               |           | 42  | 37 | 17 |
| of observed ave         |        |               |           | 45  | 27 | 18 |
| 0.89                    | 0.15   |               |           | 41  | 36 | 14 |
| 0.11                    | 0.85   |               |           | 44  | 28 | 18 |
|                         |        |               |           | 43  | 32 | 21 |
|                         |        |               |           | 36  | 37 | 18 |
|                         |        |               |           | 41  | 30 | 18 |
|                         |        |               |           | 44  | 33 | 18 |
|                         |        |               |           | 44  | 24 | 21 |
|                         |        |               |           | 42  | 35 | 14 |
|                         |        |               |           | 42  | 32 | 19 |
|                         |        |               |           | 40  | 39 | 19 |
|                         |        |               |           | 44  | 40 | 17 |
|                         |        |               |           | 40  | 41 | 23 |
|                         |        |               |           | 43  | 27 | 21 |
|                         |        |               |           | 41  | 37 | 21 |
|                         |        |               |           | 39  | 32 | 20 |
|                         |        |               |           | 39  | 32 | 17 |
|                         |        |               |           | 41  | 35 | 16 |
|                         |        |               |           | 43  | 38 | 17 |
|                         |        |               |           | 42  | 31 | 18 |
|                         |        |               |           | 41  | 29 | 17 |
|                         |        |               |           | 41  | 34 | 15 |
|                         |        |               |           | 42  | 37 | 15 |
|                         |        |               |           | 41  | 35 | 16 |
|                         |        |               |           | 40  | 38 | 20 |
|                         |        |               |           | 39  | 29 | 19 |

```

The Wilcoxon Rank-Sum Test ('
100 trials
UCtru UCpseudo
Obser 100 100
Mean: 43 25
Media 43 25
Stand 1 7
The Test Procedure
Hyp 0
Nb. 33
Ave 6
Ran ####
Ran 101
Tes ####
Nom 0

Two-Tailed Test (Normal Appro
Cri -1.95996398454005 and 1
Dec Reject H0 if |Z-Stat| >
Z S 12
Z S 12
Z S 12
P-V 0
Fin The Null Hypothesis Mus

```

|    |    |    |
|----|----|----|
| 41 | 32 | 15 |
| 41 | 32 | 21 |
| 41 | 36 | 16 |
| 43 | 33 | 17 |
| 40 | 29 | 12 |
| 42 | 34 | 15 |
| 43 | 26 | 17 |
| 39 | 35 | 17 |
| 44 | 29 | 20 |
| 43 | 28 | 17 |
| 40 | 32 | 18 |
| 41 | 36 | 17 |
| 42 | 32 | 15 |
| 42 | 35 | 19 |
| 44 | 29 | 19 |
| 39 | 35 | 16 |
| 41 | 32 | 19 |
| 41 | 38 | 22 |
| 42 | 32 | 14 |
| 41 | 29 | 17 |
| 40 | 39 | 21 |
| 39 | 38 | 17 |
| 42 | 32 | 14 |
| 43 | 29 | 21 |
| 44 | 35 | 19 |
| 43 | 29 | 20 |
| 43 | 30 | 19 |
| 40 | 34 | 17 |
| 42 | 29 | 16 |
| 42 | 32 | 17 |
| 41 | 26 | 18 |
| 44 | 31 | 19 |
| 42 | 30 | 17 |
| 43 | 37 | 18 |
| 42 | 27 | 19 |
| 43 | 33 | 20 |
| 43 | 33 | 18 |
| 42 | 36 | 21 |
| 43 | 33 | 20 |
| 41 | 27 | 21 |
| 43 | 28 | 17 |
| 37 | 36 | 18 |
| 43 | 34 | 16 |
| 43 | 29 | 23 |
| 43 | 30 | 21 |
| 41 | 34 | 20 |
| 38 | 38 | 17 |
| 38 | 31 | 20 |
| 42 | 27 | 17 |
| 42 | 34 | 20 |
| 43 | 36 | 16 |
| 44 | 35 | 21 |
| 45 | 34 | 18 |
| 42 | 26 | 18 |
| 42 | 32 | 15 |
| 39 | 25 | 17 |
| 41 | 30 | 20 |
| 43 | 28 | 17 |
| 42 | 29 | 17 |

|    |    |    |
|----|----|----|
| 43 | 27 | 17 |
| 42 | 33 | 20 |
| 44 | 32 | 15 |
| 42 | 39 | 19 |
| 44 | 26 | 18 |
| 42 | 30 | 18 |
| 43 | 41 | 20 |
| 43 | 26 | 17 |
| 42 | 29 | 19 |
| 41 | 33 | 20 |
| 42 | 38 | 18 |
| 40 | 30 | 19 |
| 42 | 33 | 17 |
| 38 | 28 | 23 |
| 40 | 30 | 14 |
| 40 | 39 | 17 |
| 43 | 29 | 17 |
| 42 | 29 | 18 |
| 42 | 35 | 17 |
| 41 | 27 | 18 |
| 41 | 33 | 18 |
| 39 | 34 | 17 |
| 42 | 40 | 19 |
| 42 | 27 | 19 |
| 42 | 33 | 15 |
| 41 | 31 | 19 |
| 41 | 37 | 17 |
| 43 | 32 | 19 |
| 43 | 34 | 18 |
| 40 | 33 | 17 |
| 43 | 32 | 16 |
| 42 | 34 | 16 |
| 43 | 35 | 20 |
| 43 | 31 | 18 |
| 44 | 29 | 18 |
| 44 | 31 | 16 |
| 45 | 32 | 18 |
| 43 | 33 | 16 |
| 36 | 35 | 19 |
| 44 | 29 | 19 |
| 45 | 27 | 14 |
| 43 | 33 | 16 |
| 39 | 31 | 16 |
| 43 | 30 | 20 |
| 44 | 34 | 20 |
| 41 | 31 | 20 |
| 43 | 31 | 18 |
| 42 | 28 | 17 |
| 41 | 36 | 18 |
| 39 | 33 | 15 |
| 38 | 32 | 17 |
| 41 | 29 | 16 |
| 42 | 32 | 15 |
| 42 | 37 | 16 |
| 43 | 34 | 19 |
| 44 | 34 | 19 |
| 41 | 30 | 16 |
| 42 | 35 | 16 |
| 42 | 27 | 18 |



|    |    |    |
|----|----|----|
| 45 | 33 | 21 |
| 38 | 31 | 15 |
| 44 | 30 | 18 |
| 42 | 37 | 15 |
| 42 | 31 | 15 |
| 41 | 31 | 15 |
| 43 | 32 | 16 |
| 42 | 27 | 16 |
| 38 | 34 | 18 |
| 42 | 35 | 19 |
| 44 | 28 | 20 |
| 42 | 30 | 19 |
| 44 | 34 | 17 |
| 44 | 30 | 16 |
| 43 | 38 | 17 |
| 41 | 35 | 19 |
| 38 | 41 | 15 |
| 41 | 33 | 17 |
| 40 | 28 | 18 |
| 43 | 32 | 21 |
| 39 | 30 | 17 |
| 40 | 35 | 20 |
| 42 | 29 | 19 |
| 41 | 35 | 19 |
| 42 | 28 | 16 |
| 41 | 33 | 13 |
| 43 | 32 | 21 |
| 38 | 32 | 19 |
| 44 | 37 | 18 |
| 43 | 28 | 17 |
| 42 | 34 | 15 |
| 41 | 29 | 15 |
| 44 | 27 | 17 |
| 42 | 30 | 15 |
| 45 | 38 | 16 |
| 38 | 31 | 14 |
| 41 | 26 | 20 |
| 42 | 33 | 22 |
| 41 | 31 | 18 |
| 42 | 32 | 17 |
| 42 | 27 | 19 |
| 39 | 31 | 18 |
| 43 | 33 | 19 |
| 44 | 33 | 18 |
| 40 | 36 | 17 |
| 43 | 30 | 18 |
| 44 | 31 | 14 |
| 38 | 39 | 23 |
| 43 | 28 | 19 |
| 45 | 38 | 20 |
| 42 | 34 | 22 |
| 42 | 30 | 14 |
| 42 | 29 | 17 |
| 43 | 34 | 19 |
| 43 | 32 | 19 |
| 42 | 32 | 20 |
| 41 | 31 | 19 |
| 42 | 31 | 19 |
| 44 | 32 | 16 |

|    |    |    |
|----|----|----|
| 41 | 32 | 17 |
| 42 | 28 | 19 |
| 42 | 36 | 15 |
| 41 | 31 | 13 |
| 42 | 35 | 16 |
| 43 | 35 | 19 |
| 41 | 34 | 19 |
| 41 | 32 | 16 |
| 43 | 34 | 15 |
| 42 | 28 | 19 |
| 42 | 29 | 20 |
| 42 | 30 | 14 |
| 44 | 48 | 18 |
| 42 | 32 | 17 |
| 40 | 32 | 20 |
| 42 | 32 | 20 |
| 44 | 29 | 19 |
| 43 | 33 | 15 |
| 40 | 39 | 19 |
| 41 | 23 | 18 |
| 43 | 31 | 19 |
| 42 | 31 | 17 |
| 42 | 35 | 15 |
| 42 | 39 | 17 |
| 43 | 33 | 18 |
| 41 | 29 | 17 |
| 43 | 30 | 20 |
| 41 | 35 | 18 |
| 43 | 30 | 17 |
| 43 | 28 | 15 |
| 44 | 33 | 16 |
| 45 | 28 | 18 |
| 43 | 31 | 16 |
| 42 | 33 | 17 |
| 43 | 27 | 16 |
| 38 | 27 | 17 |
| 42 | 34 | 20 |
| 43 | 32 | 16 |
| 42 | 31 | 19 |
| 40 | 32 | 14 |
| 42 | 35 | 16 |
| 42 | 35 | 21 |
| 41 | 37 | 21 |
| 43 | 28 | 19 |
| 44 | 32 | 17 |
| 44 | 38 | 22 |
| 40 | 33 | 18 |
| 45 | 27 | 16 |
| 44 | 28 | 18 |
| 44 | 30 | 20 |
| 44 | 29 | 16 |
| 43 | 33 | 19 |
| 40 | 34 | 20 |
| 44 | 30 | 20 |
| 44 | 36 | 17 |
| 42 | 35 | 19 |
| 44 | 27 | 18 |
| 41 | 38 | 18 |
| 41 | 34 | 22 |

|    |    |    |
|----|----|----|
| 45 | 31 | 16 |
| 42 | 27 | 17 |
| 42 | 30 | 19 |
| 37 | 35 | 20 |
| 43 | 29 | 16 |
| 42 | 35 | 15 |
| 42 | 26 | 21 |
| 42 | 33 | 18 |
| 42 | 33 | 20 |
| 40 | 34 | 18 |
| 43 | 27 | 16 |
| 42 | 31 | 19 |
| 42 | 37 | 20 |
| 42 | 35 | 20 |
| 44 | 28 | 20 |
| 43 | 27 | 20 |
| 43 | 32 | 16 |
| 44 | 36 | 16 |
| 41 | 26 | 18 |
| 43 | 34 | 14 |
| 44 | 27 | 19 |
| 42 | 30 | 15 |
| 39 | 32 | 18 |
| 42 | 25 | 16 |
| 44 | 25 | 19 |
| 39 | 34 | 14 |
| 39 | 35 | 20 |
| 40 | 35 | 18 |
| 40 | 35 | 18 |
| 41 | 31 | 19 |
| 44 | 23 | 18 |
| 44 | 27 | 14 |
| 42 | 36 | 15 |
| 40 | 32 | 20 |
| 42 | 32 | 16 |
| 38 | 27 | 17 |
| 42 | 33 | 17 |
| 43 | 31 | 20 |
| 46 | 25 | 15 |
| 42 | 34 | 17 |
| 42 | 34 | 18 |
| 42 | 34 | 17 |
| 44 | 30 | 16 |
| 41 | 34 | 15 |
| 41 | 28 | 23 |
| 42 | 32 | 14 |
| 44 | 31 | 14 |
| 42 | 30 | 17 |
| 44 | 30 | 18 |
| 42 | 34 | 19 |
| 38 | 34 | 17 |
| 43 | 38 | 17 |
| 43 | 32 | 19 |
| 42 | 32 | 17 |
| 43 | 32 | 17 |
| 43 | 33 | 20 |
| 43 | 35 | 16 |
| 42 | 37 | 16 |
| 41 | 35 | 18 |

|    |    |    |
|----|----|----|
| 45 | 41 | 21 |
| 45 | 31 | 17 |
| 43 | 41 | 17 |
| 43 | 29 | 20 |
| 43 | 31 | 16 |
| 44 | 25 | 17 |
| 37 | 33 | 16 |
| 44 | 30 | 18 |
| 42 | 30 | 13 |
| 41 | 33 | 19 |
| 43 | 35 | 22 |
| 42 | 33 | 17 |
| 45 | 32 | 17 |
| 41 | 32 | 20 |
| 44 | 32 | 16 |
| 41 | 35 | 19 |
| 43 | 34 | 21 |
| 38 | 39 | 24 |
| 43 | 39 | 17 |
| 41 | 34 | 22 |
| 43 | 33 | 16 |
| 42 | 27 | 17 |
| 41 | 33 | 17 |
| 43 | 30 | 18 |
| 43 | 28 | 19 |
| 42 | 36 | 18 |
| 43 | 29 | 16 |
| 45 | 27 | 18 |
| 39 | 31 | 18 |
| 43 | 32 | 20 |
| 46 | 30 | 17 |
| 38 | 37 | 20 |
| 41 | 27 | 15 |
| 40 | 31 | 17 |
| 44 | 36 | 18 |
| 39 | 29 | 17 |
| 39 | 26 | 17 |
| 43 | 34 | 20 |
| 42 | 33 | 18 |
| 44 | 36 | 20 |
| 41 | 32 | 20 |
| 43 | 28 | 19 |
| 45 | 26 | 18 |
| 40 | 33 | 15 |
| 41 | 29 | 18 |
| 43 | 27 | 16 |
| 41 | 32 | 19 |
| 41 | 33 | 19 |
| 42 | 34 | 15 |
| 43 | 34 | 17 |
| 44 | 34 | 19 |
| 38 | 32 | 19 |
| 42 | 32 | 18 |
| 41 | 30 | 19 |
| 41 | 33 | 15 |
| 42 | 37 | 16 |
| 42 | 32 | 19 |
| 43 | 28 | 19 |
| 41 | 34 | 15 |

|    |    |    |
|----|----|----|
| 37 | 33 | 19 |
| 43 | 36 | 17 |
| 38 | 30 | 20 |
| 43 | 32 | 19 |
| 39 | 30 | 17 |
| 41 | 28 | 17 |
| 41 | 33 | 18 |
| 38 | 33 | 16 |
| 42 | 35 | 16 |
| 43 | 30 | 20 |
| 41 | 27 | 17 |
| 41 | 39 | 15 |
| 42 | 31 | 19 |
| 43 | 31 | 17 |
| 42 | 34 | 19 |
| 41 | 32 | 17 |
| 43 | 35 | 21 |
| 44 | 30 | 17 |
| 43 | 31 | 19 |
| 41 | 25 | 18 |
| 42 | 38 | 17 |
| 39 | 32 | 19 |
| 40 | 35 | 18 |
| 40 | 29 | 16 |
| 40 | 34 | 16 |
| 41 | 30 | 18 |
| 42 | 34 | 18 |
| 40 | 31 | 19 |
| 40 | 34 | 18 |
| 45 | 35 | 18 |
| 43 | 31 | 19 |
| 43 | 31 | 23 |
| 42 | 33 | 17 |
| 42 | 36 | 20 |
| 42 | 36 | 15 |
| 42 | 23 | 17 |
| 42 | 35 | 19 |
| 42 | 28 | 16 |
| 42 | 31 | 17 |
| 41 | 29 | 15 |
| 43 | 25 | 16 |
| 44 | 34 | 20 |
| 42 | 32 | 20 |
| 41 | 36 | 17 |
| 40 | 41 | 21 |
| 43 | 30 | 19 |
| 43 | 34 | 19 |
| 42 | 35 | 21 |
| 43 | 36 | 20 |
| 44 | 27 | 17 |
| 43 | 31 | 22 |
| 41 | 32 | 17 |
| 42 | 36 | 20 |
| 41 | 27 | 17 |
| 41 | 36 | 18 |
| 43 | 28 | 15 |
| 44 | 32 | 20 |
| 45 | 36 | 14 |
| 41 | 25 | 15 |

|    |    |    |
|----|----|----|
| 42 | 31 | 20 |
| 41 | 34 | 19 |
| 43 | 34 | 20 |
| 42 | 30 | 17 |
| 42 | 32 | 18 |
| 41 | 31 | 17 |
| 43 | 30 | 18 |
| 44 | 30 | 14 |
| 40 | 34 | 13 |
| 39 | 34 | 19 |
| 44 | 28 | 21 |
| 38 | 35 | 20 |
| 39 | 32 | 18 |
| 42 | 31 | 17 |
| 43 | 35 | 17 |
| 41 | 30 | 19 |
| 42 | 34 | 15 |
| 42 | 34 | 18 |
| 42 | 30 | 18 |
| 42 | 38 | 15 |
| 43 | 30 | 18 |
| 40 | 36 | 14 |
| 43 | 32 | 19 |
| 44 | 31 | 19 |
| 42 | 33 | 19 |
| 41 | 36 | 18 |
| 43 | 30 | 20 |
| 44 | 33 | 18 |
| 39 | 33 | 16 |
| 45 | 33 | 17 |
| 42 | 31 | 15 |
| 45 | 30 | 20 |
| 41 | 30 | 19 |
| 43 | 34 | 16 |
| 43 | 28 | 20 |
| 42 | 27 | 14 |
| 43 | 36 | 16 |
| 42 | 30 | 18 |
| 44 | 38 | 18 |
| 39 | 34 | 20 |
| 38 | 40 | 16 |
| 44 | 37 | 17 |
| 45 | 27 | 19 |
| 43 | 29 | 22 |
| 45 | 35 | 18 |
| 40 | 29 | 19 |
| 42 | 39 | 15 |
| 43 | 37 | 17 |
| 42 | 28 | 16 |
| 44 | 32 | 18 |
| 44 | 32 | 16 |
| 43 | 35 | 20 |
| 44 | 39 | 19 |
| 45 | 30 | 21 |
| 44 | 33 | 17 |
| 43 | 20 | 20 |
| 44 | 35 | 17 |
| 42 | 28 | 15 |
| 45 | 35 | 17 |

|    |    |    |
|----|----|----|
| 45 | 32 | 15 |
| 42 | 36 | 14 |
| 40 | 31 | 15 |
| 40 | 34 | 19 |
| 44 | 29 | 19 |
| 39 | 31 | 17 |
| 42 | 29 | 15 |
| 41 | 39 | 17 |
| 43 | 34 | 17 |
| 44 | 29 | 16 |
| 45 | 33 | 15 |
| 41 | 30 | 16 |
| 38 | 33 | 20 |
| 44 | 29 | 15 |
| 42 | 31 | 18 |
| 40 | 27 | 20 |
| 44 | 30 | 16 |
| 42 | 34 | 17 |
| 42 | 35 | 18 |
| 42 | 34 | 20 |
| 38 | 35 | 19 |
| 42 | 32 | 17 |
| 43 | 34 | 19 |
| 43 | 30 | 16 |
| 41 | 27 | 16 |
| 40 | 27 | 12 |
| 41 | 37 | 19 |
| 41 | 35 | 16 |
| 42 | 33 | 21 |
| 42 | 34 | 16 |
| 38 | 34 | 20 |
| 41 | 28 | 19 |
| 44 | 33 | 16 |
| 40 | 31 | 16 |
| 44 | 32 | 17 |
| 42 | 36 | 18 |
| 44 | 32 | 17 |
| 43 | 39 | 19 |
| 44 | 28 | 19 |
| 42 | 33 | 19 |
| 43 | 31 | 15 |
| 44 | 32 | 16 |
| 43 | 33 | 17 |
| 45 | 34 | 15 |
| 41 | 32 | 21 |
| 38 | 32 | 19 |
| 40 | 29 | 22 |
| 44 | 27 | 17 |
| 42 | 28 | 18 |
| 43 | 32 | 16 |
| 41 | 34 | 15 |
| 43 | 32 | 15 |
| 41 | 26 | 18 |
| 41 | 32 | 15 |
| 42 | 27 | 16 |
| 43 | 25 | 19 |
| 41 | 30 | 16 |
| 43 | 32 | 15 |

|    |    |    |
|----|----|----|
| 41 | 32 | 18 |
| 43 | 33 | 17 |
| 44 | 27 | 16 |
| 41 | 33 | 15 |
| 44 | 26 | 20 |
| 43 | 35 | 18 |
| 41 | 38 | 20 |
| 38 | 31 | 19 |
| 41 | 36 | 21 |
| 44 | 35 | 18 |
| 45 | 35 | 16 |
| 44 | 29 | 19 |
| 42 | 29 | 20 |
| 44 | 32 | 17 |
| 41 | 32 | 16 |
| 45 | 27 | 20 |
| 42 | 33 | 18 |
| 42 | 37 | 16 |
| 44 | 40 | 19 |
| 43 | 31 | 19 |
| 41 | 33 | 14 |
| 42 | 29 | 17 |
| 38 | 36 | 18 |
| 41 | 25 | 17 |
| 43 | 29 | 18 |
| 41 | 28 | 18 |
| 41 | 27 | 17 |
| 37 | 36 | 20 |
| 42 | 33 | 15 |
| 39 | 33 | 14 |
| 42 | 37 | 19 |
| 43 | 28 | 17 |
| 42 | 32 | 18 |
| 41 | 31 | 18 |
| 44 | 33 | 18 |
| 42 | 32 | 19 |
| 42 | 31 | 20 |
| 41 | 37 | 19 |
| 40 | 30 | 19 |
| 44 | 30 | 17 |
| 38 | 33 | 17 |
| 38 | 33 | 19 |
| 43 | 36 | 17 |
| 45 | 31 | 17 |
| 43 | 31 | 18 |
| 41 | 39 | 21 |
| 43 | 32 | 17 |
| 42 | 29 | 16 |
| 44 | 29 | 18 |
| 40 | 29 | 15 |
| 41 | 33 | 19 |
| 42 | 29 | 15 |
| 41 | 30 | 17 |
| 41 | 28 | 17 |
| 41 | 28 | 15 |
| 37 | 40 | 17 |
| 41 | 35 | 16 |
| 43 | 30 | 15 |
| 43 | 32 | 16 |

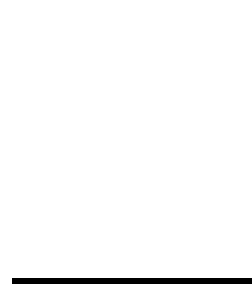



|    |    |    |
|----|----|----|
| 43 | 23 | 17 |
| 44 | 32 | 20 |
| 42 | 29 | 18 |
| 40 | 33 | 20 |
| 42 | 29 | 18 |
| 43 | 32 | 17 |
| 43 | 27 | 22 |
| 39 | 35 | 17 |
| 42 | 36 | 17 |
| 42 | 38 | 16 |
| 41 | 39 | 16 |
| 41 | 23 | 22 |
| 41 | 32 | 19 |
| 40 | 34 | 18 |
| 39 | 31 | 20 |
| 41 | 33 | 20 |
| 38 | 33 | 19 |
| 43 | 35 | 19 |
| 41 | 30 | 24 |
| 42 | 41 | 19 |
| 43 | 33 | 20 |
| 43 | 32 | 21 |
| 40 | 37 | 21 |
| 43 | 40 | 21 |
| 42 | 40 | 21 |
| 39 | 27 | 18 |
| 41 | 29 | 17 |
| 42 | 38 | 18 |
| 43 | 34 | 18 |
| 43 | 28 | 19 |
| 44 | 32 | 20 |
| 42 | 30 | 18 |
| 44 | 32 | 18 |
| 40 | 33 | 15 |
| 43 | 35 | 19 |
| 44 | 32 | 16 |
| 43 | 30 | 19 |
| 41 | 27 | 20 |
| 44 | 26 | 16 |
| 43 | 28 | 14 |
| 42 | 36 | 16 |
| 43 | 28 | 21 |
| 42 | 32 | 19 |
| 40 | 32 | 14 |
| 43 | 36 | 18 |
| 42 | 29 | 16 |
| 39 | 35 | 16 |
| 43 | 30 | 20 |
| 38 | 35 | 16 |
| 44 | 30 | 17 |
| 38 | 30 | 21 |
| 42 | 29 | 19 |
| 41 | 35 | 18 |
| 41 | 34 | 20 |
| 40 | 41 | 20 |
| 39 | 36 | 20 |
| 44 | 30 | 18 |
| 43 | 36 | 16 |
| 45 | 33 | 19 |

|    |    |    |
|----|----|----|
| 42 | 35 | 20 |
| 43 | 30 | 19 |
| 42 | 33 | 18 |
| 39 | 32 | 16 |
| 42 | 28 | 19 |
| 44 | 33 | 19 |
| 38 | 32 | 17 |
| 44 | 32 | 17 |
| 43 | 36 | 19 |
| 43 | 30 | 21 |
| 41 | 26 | 17 |
| 41 | 28 | 17 |
| 39 | 30 | 15 |
| 45 | 37 | 18 |
| 45 | 31 | 18 |
| 43 | 38 | 19 |
| 44 | 42 | 16 |
| 43 | 30 | 14 |
| 43 | 30 | 15 |
| 42 | 28 | 19 |
| 40 | 31 | 16 |
| 43 | 32 | 18 |
| 41 | 38 | 19 |
| 43 | 33 | 16 |
| 42 | 31 | 18 |
| 43 | 33 | 20 |
| 40 | 26 | 18 |
| 42 | 36 | 16 |
| 42 | 28 | 15 |
| 44 | 38 | 19 |
| 42 | 27 | 17 |
| 43 | 31 | 16 |
| 42 | 31 | 18 |
| 41 | 29 | 21 |
| 43 | 35 | 16 |
| 44 | 30 | 16 |
| 40 | 38 | 20 |
| 43 | 31 | 17 |
| 44 | 33 | 17 |
| 41 | 30 | 18 |
| 42 | 31 | 22 |
| 43 | 29 | 20 |
| 43 | 30 | 19 |
| 43 | 31 | 19 |
| 44 | 33 | 19 |
| 44 | 37 | 18 |
| 41 | 33 | 22 |
| 44 | 37 | 21 |
| 43 | 34 | 15 |
| 44 | 27 | 16 |
| 45 | 27 | 16 |
| 44 | 30 | 20 |
| 43 | 36 | 18 |
| 40 | 37 | 19 |
| 41 | 33 | 21 |
| 41 | 33 | 18 |
| 41 | 27 | 17 |
| 43 | 30 | 19 |
| 42 | 25 | 14 |

|    |    |    |
|----|----|----|
| 42 | 31 | 16 |
| 43 | 34 | 21 |
| 43 | 37 | 16 |
| 42 | 25 | 21 |
| 42 | 36 | 20 |
| 42 | 30 | 12 |
| 44 | 40 | 17 |
| 43 | 28 | 22 |
| 42 | 29 | 18 |
| 39 | 29 | 17 |
| 41 | 36 | 18 |
| 44 | 33 | 18 |
| 41 | 28 | 22 |
| 42 | 37 | 19 |
| 43 | 24 | 19 |
| 43 | 33 | 19 |
| 40 | 37 | 19 |
| 40 | 37 | 19 |
| 40 | 31 | 17 |
| 44 | 34 | 16 |
| 42 | 34 | 18 |
| 42 | 38 | 18 |
| 43 | 36 | 18 |
| 45 | 31 | 19 |
| 45 | 29 | 19 |
| 41 | 35 | 17 |
| 43 | 32 | 19 |
| 42 | 25 | 18 |
| 42 | 36 | 17 |
| 39 | 33 | 18 |
| 42 | 31 | 18 |
| 41 | 35 | 20 |
| 42 | 31 | 20 |
| 43 | 32 | 19 |
| 42 | 31 | 18 |
| 44 | 30 | 18 |
| 43 | 34 | 21 |
| 46 | 27 | 14 |
| 42 | 30 | 20 |
| 43 | 29 | 21 |
| 43 | 30 | 19 |
| 43 | 32 | 17 |
| 39 | 30 | 18 |
| 41 | 35 | 17 |
| 41 | 30 | 20 |
| 42 | 36 | 21 |
| 43 | 25 | 19 |
| 40 | 34 | 18 |
| 42 | 34 | 21 |
| 42 | 34 | 21 |
| 39 | 32 | 23 |
| 44 | 28 | 21 |
| 43 | 33 | 19 |
| 43 | 34 | 13 |
| 42 | 33 | 17 |
| 39 | 32 | 16 |
| 45 | 37 | 20 |
| 43 | 36 | 20 |
| 43 | 40 | 19 |

|    |    |    |
|----|----|----|
| 42 | 31 | 16 |
| 42 | 31 | 19 |
| 42 | 34 | 20 |
| 44 | 26 | 17 |
| 40 | 31 | 16 |
| 44 | 40 | 18 |
| 41 | 35 | 19 |
| 42 | 34 | 17 |
| 42 | 33 | 16 |
| 41 | 34 | 21 |
| 39 | 30 | 16 |
| 41 | 28 | 16 |
| 42 | 29 | 17 |
| 42 | 33 | 18 |
| 42 | 32 | 19 |
| 42 | 27 | 17 |
| 42 | 29 | 15 |
| 42 | 35 | 20 |
| 41 | 28 | 16 |
| 43 | 28 | 14 |
| 41 | 36 | 17 |
| 43 | 42 | 20 |
| 43 | 34 | 20 |
| 41 | 34 | 15 |
| 42 | 36 | 20 |
| 40 | 30 | 20 |
| 41 | 29 | 14 |
| 45 | 26 | 19 |
| 43 | 27 | 20 |
| 44 | 28 | 19 |
| 41 | 31 | 19 |
| 42 | 28 | 19 |
| 41 | 40 | 17 |
| 42 | 41 | 18 |
| 42 | 31 | 17 |
| 38 | 31 | 17 |
| 40 | 28 | 16 |
| 43 | 31 | 19 |
| 42 | 32 | 15 |
| 42 | 31 | 19 |
| 45 | 27 | 14 |
| 42 | 31 | 17 |
| 42 | 31 | 20 |
| 43 | 31 | 19 |
| 42 | 31 | 17 |
| 43 | 24 | 17 |
| 45 | 36 | 17 |
| 43 | 35 | 21 |
| 44 | 27 | 19 |
| 42 | 27 | 17 |
| 41 | 31 | 13 |
| 43 | 28 | 16 |
| 40 | 36 | 19 |
| 44 | 38 | 17 |
| 42 | 29 | 19 |
| 43 | 29 | 16 |
| 42 | 32 | 17 |
| 43 | 28 | 17 |
| 43 | 29 | 18 |

|    |    |    |
|----|----|----|
| 42 | 25 | 17 |
| 42 | 36 | 18 |
| 41 | 28 | 17 |
| 43 | 30 | 20 |
| 44 | 36 | 19 |
| 41 | 36 | 15 |
| 43 | 28 | 18 |
| 44 | 31 | 18 |
| 41 | 29 | 16 |
| 42 | 39 | 17 |
| 42 | 33 | 20 |
| 43 | 39 | 20 |
| 46 | 31 | 19 |
| 38 | 32 | 19 |
| 38 | 35 | 20 |
| 42 | 29 | 22 |
| 41 | 32 | 17 |
| 41 | 27 | 18 |
| 43 | 34 | 20 |
| 44 | 33 | 15 |
| 43 | 34 | 17 |
| 43 | 32 | 20 |
| 37 | 31 | 19 |
| 43 | 25 | 17 |
| 42 | 33 | 18 |
| 43 | 35 | 17 |
| 39 | 35 | 18 |
| 42 | 28 | 21 |
| 42 | 32 | 15 |
| 43 | 31 | 16 |
| 43 | 31 | 17 |
| 44 | 34 | 19 |
| 41 | 35 | 17 |
| 43 | 29 | 19 |
| 40 | 34 | 19 |
| 43 | 21 | 19 |
| 42 | 26 | 14 |
| 45 | 33 | 18 |
| 45 | 30 | 19 |
| 43 | 31 | 21 |
| 42 | 22 | 18 |
| 42 | 28 | 19 |
| 43 | 38 | 17 |
| 43 | 36 | 16 |
| 43 | 30 | 18 |
| 41 | 37 | 20 |
| 44 | 30 | 16 |
| 41 | 29 | 17 |
| 43 | 37 | 17 |
| 43 | 30 | 18 |
| 43 | 29 | 18 |
| 42 | 30 | 20 |
| 38 | 26 | 19 |
| 42 | 31 | 16 |
| 44 | 33 | 19 |
| 44 | 38 | 19 |
| 40 | 32 | 16 |
| 39 | 28 | 23 |
| 43 | 34 | 19 |

|    |    |    |
|----|----|----|
| 42 | 31 | 21 |
| 42 | 28 | 21 |
| 41 | 31 | 17 |
| 43 | 31 | 16 |
| 43 | 32 | 19 |
| 39 | 31 | 20 |
| 41 | 30 | 15 |
| 41 | 29 | 18 |
| 42 | 25 | 19 |
| 43 | 33 | 21 |
| 44 | 30 | 18 |
| 42 | 33 | 21 |
| 44 | 32 | 19 |
| 45 | 38 | 20 |
| 43 | 26 | 16 |
| 41 | 31 | 18 |
| 41 | 34 | 13 |
| 42 | 37 | 17 |
| 42 | 30 | 18 |
| 44 | 35 | 19 |
| 42 | 31 | 18 |
| 44 | 25 | 14 |
| 41 | 26 | 19 |
| 42 | 31 | 19 |
| 40 | 32 | 18 |
| 44 | 27 | 18 |
| 45 | 29 | 19 |
| 41 | 35 | 18 |
| 45 | 27 | 17 |
| 42 | 38 | 17 |
| 40 | 25 | 17 |
| 42 | 30 | 19 |
| 43 | 36 | 16 |
| 43 | 32 | 15 |
| 42 | 29 | 16 |
| 41 | 38 | 24 |
| 42 | 30 | 17 |
| 42 | 31 | 19 |
| 42 | 31 | 16 |
| 44 | 31 | 19 |
| 43 | 27 | 23 |
| 44 | 27 | 20 |
| 42 | 30 | 13 |
| 40 | 36 | 17 |
| 39 | 37 | 16 |
| 43 | 27 | 16 |
| 43 | 27 | 17 |
| 42 | 31 | 16 |
| 43 | 26 | 19 |
| 42 | 30 | 16 |
| 42 | 35 | 20 |
| 44 | 31 | 20 |
| 42 | 31 | 16 |
| 44 | 34 | 20 |
| 40 | 32 | 16 |
| 42 | 31 | 16 |
| 40 | 35 | 20 |
| 43 | 32 | 20 |
| 42 | 31 | 14 |

|    |    |    |
|----|----|----|
| 42 | 33 | 15 |
| 44 | 36 | 19 |
| 42 | 32 | 20 |
| 42 | 32 | 18 |
| 43 | 32 | 22 |
| 40 | 34 | 16 |
| 38 | 32 | 17 |
| 42 | 34 | 16 |
| 43 | 36 | 20 |
| 41 | 31 | 16 |
| 42 | 27 | 24 |
| 41 | 33 | 17 |
| 42 | 38 | 18 |
| 43 | 29 | 20 |
| 43 | 30 | 19 |

|    |    |    |
|----|----|----|
| 44 | 27 | 20 |
| 42 | 34 | 16 |
| 38 | 34 | 20 |
| 41 | 28 | 19 |
| 44 | 33 | 16 |
| 40 | 31 | 16 |
| 44 | 32 | 17 |
| 42 | 36 | 18 |
| 44 | 32 | 17 |
| 43 | 39 | 19 |
| 44 | 28 | 19 |
| 42 | 33 | 19 |
| 43 | 31 | 15 |
| 44 | 32 | 16 |
| 43 | 33 | 17 |
| 45 | 34 | 15 |



|    |    |    |
|----|----|----|
| 41 | 32 | 21 |
| 38 | 32 | 19 |
| 40 | 29 | 22 |
| 44 | 27 | 17 |
| 42 | 28 | 18 |
| 43 | 32 | 16 |
| 41 | 34 | 15 |
| 43 | 32 | 15 |
| 41 | 26 | 18 |
| 41 | 32 | 15 |
| 42 | 27 | 16 |
| 43 | 25 | 19 |
| 41 | 30 | 16 |
| 43 | 32 | 15 |
| 41 | 32 | 18 |
| 43 | 33 | 17 |
| 44 | 27 | 16 |
| 41 | 33 | 15 |
| 44 | 26 | 20 |
| 43 | 35 | 18 |
| 41 | 38 | 20 |
| 38 | 31 | 19 |
| 41 | 36 | 21 |
| 44 | 35 | 18 |
| 45 | 35 | 16 |
| 44 | 29 | 19 |
| 42 | 29 | 20 |
| 44 | 32 | 17 |
| 41 | 32 | 16 |
| 45 | 27 | 20 |
| 42 | 33 | 18 |
| 42 | 37 | 16 |
| 44 | 40 | 19 |
| 43 | 31 | 19 |
| 41 | 33 | 14 |
| 42 | 29 | 17 |
| 38 | 36 | 18 |
| 41 | 25 | 17 |
| 43 | 29 | 18 |
| 41 | 28 | 18 |
| 41 | 27 | 17 |
| 37 | 36 | 20 |
| 42 | 33 | 15 |
| 39 | 33 | 14 |
| 42 | 37 | 19 |
| 43 | 28 | 17 |
| 42 | 32 | 18 |
| 41 | 31 | 18 |
| 44 | 33 | 18 |
| 42 | 32 | 19 |
| 42 | 31 | 20 |
| 41 | 37 | 19 |
| 40 | 30 | 19 |
| 44 | 30 | 17 |
| 38 | 33 | 17 |
| 38 | 33 | 19 |
| 43 | 36 | 17 |
| 45 | 31 | 17 |
| 43 | 31 | 18 |

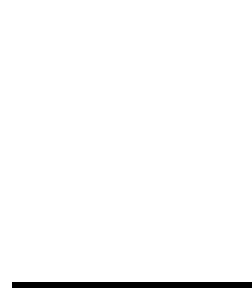

|    |    |    |
|----|----|----|
| 41 | 39 | 21 |
| 43 | 32 | 17 |
| 42 | 29 | 16 |
| 44 | 29 | 18 |
| 40 | 29 | 15 |
| 41 | 33 | 19 |
| 42 | 29 | 15 |
| 41 | 30 | 17 |
| 41 | 28 | 17 |
| 41 | 28 | 15 |
| 37 | 40 | 17 |
| 41 | 35 | 16 |
| 43 | 30 | 15 |
| 43 | 32 | 16 |
| 43 | 23 | 17 |
| 44 | 32 | 20 |
| 42 | 29 | 18 |
| 40 | 33 | 20 |
| 42 | 29 | 18 |
| 43 | 32 | 17 |
| 43 | 27 | 22 |
| 39 | 35 | 17 |
| 42 | 36 | 17 |
| 42 | 38 | 16 |
| 41 | 39 | 16 |
| 41 | 23 | 22 |
| 41 | 32 | 19 |
| 40 | 34 | 18 |
| 39 | 31 | 20 |
| 41 | 33 | 20 |
| 38 | 33 | 19 |
| 43 | 35 | 19 |
| 41 | 30 | 24 |
| 42 | 41 | 19 |
| 43 | 33 | 20 |
| 43 | 32 | 21 |
| 40 | 37 | 21 |
| 43 | 40 | 21 |
| 42 | 40 | 21 |
| 39 | 27 | 18 |
| 41 | 29 | 17 |
| 42 | 38 | 18 |
| 43 | 34 | 18 |
| 43 | 28 | 19 |
| 44 | 32 | 20 |
| 42 | 30 | 18 |
| 44 | 32 | 18 |
| 40 | 33 | 15 |
| 43 | 35 | 19 |
| 44 | 32 | 16 |
| 43 | 30 | 19 |
| 41 | 27 | 20 |
| 44 | 26 | 16 |
| 43 | 28 | 14 |
| 42 | 36 | 16 |
| 43 | 28 | 21 |
| 42 | 32 | 19 |
| 40 | 32 | 14 |
| 43 | 36 | 18 |

|    |    |    |
|----|----|----|
| 42 | 29 | 16 |
| 39 | 35 | 16 |
| 43 | 30 | 20 |
| 38 | 35 | 16 |
| 44 | 30 | 17 |
| 38 | 30 | 21 |
| 42 | 29 | 19 |
| 41 | 35 | 18 |
| 41 | 34 | 20 |
| 40 | 41 | 20 |
| 39 | 36 | 20 |
| 44 | 30 | 18 |
| 43 | 36 | 16 |
| 45 | 33 | 19 |
| 42 | 35 | 20 |
| 43 | 30 | 19 |
| 42 | 33 | 18 |
| 39 | 32 | 16 |
| 42 | 28 | 19 |
| 44 | 33 | 19 |
| 38 | 32 | 17 |
| 44 | 32 | 17 |
| 43 | 36 | 19 |
| 43 | 30 | 21 |
| 41 | 26 | 17 |
| 41 | 28 | 17 |
| 39 | 30 | 15 |
| 45 | 37 | 18 |
| 45 | 31 | 18 |
| 43 | 38 | 19 |
| 44 | 42 | 16 |
| 43 | 30 | 14 |
| 43 | 30 | 15 |
| 42 | 28 | 19 |
| 40 | 31 | 16 |
| 43 | 32 | 18 |
| 41 | 38 | 19 |
| 43 | 33 | 16 |
| 42 | 31 | 18 |
| 43 | 33 | 20 |
| 40 | 26 | 18 |
| 42 | 36 | 16 |
| 42 | 28 | 15 |
| 44 | 38 | 19 |
| 42 | 27 | 17 |
| 43 | 31 | 16 |
| 42 | 31 | 18 |
| 41 | 29 | 21 |
| 43 | 35 | 16 |
| 44 | 30 | 16 |
| 40 | 38 | 20 |
| 43 | 31 | 17 |
| 44 | 33 | 17 |
| 41 | 30 | 18 |
| 42 | 31 | 22 |
| 43 | 29 | 20 |
| 43 | 30 | 19 |
| 43 | 31 | 19 |
| 44 | 33 | 19 |

|    |    |    |
|----|----|----|
| 44 | 37 | 18 |
| 41 | 33 | 22 |
| 44 | 37 | 21 |
| 43 | 34 | 15 |
| 44 | 27 | 16 |
| 45 | 27 | 16 |
| 44 | 30 | 20 |
| 43 | 36 | 18 |
| 40 | 37 | 19 |
| 41 | 33 | 21 |
| 41 | 33 | 18 |
| 41 | 27 | 17 |
| 43 | 30 | 19 |
| 42 | 25 | 14 |
| 42 | 31 | 16 |
| 43 | 34 | 21 |
| 43 | 37 | 16 |
| 42 | 25 | 21 |
| 42 | 36 | 20 |
| 42 | 30 | 12 |
| 44 | 40 | 17 |
| 43 | 28 | 22 |
| 42 | 29 | 18 |
| 39 | 29 | 17 |
| 41 | 36 | 18 |
| 44 | 33 | 18 |
| 41 | 28 | 22 |
| 42 | 37 | 19 |
| 43 | 24 | 19 |
| 43 | 33 | 19 |
| 40 | 37 | 19 |
| 40 | 37 | 19 |
| 40 | 31 | 17 |
| 44 | 34 | 16 |
| 42 | 34 | 18 |
| 42 | 38 | 18 |
| 43 | 36 | 18 |
| 45 | 31 | 19 |
| 45 | 29 | 19 |
| 41 | 35 | 17 |
| 43 | 32 | 19 |
| 42 | 25 | 18 |
| 42 | 36 | 17 |
| 39 | 33 | 18 |
| 42 | 31 | 18 |
| 41 | 35 | 20 |
| 42 | 31 | 20 |
| 43 | 32 | 19 |
| 42 | 31 | 18 |
| 44 | 30 | 18 |
| 43 | 34 | 21 |
| 46 | 27 | 14 |
| 42 | 30 | 20 |
| 43 | 29 | 21 |
| 43 | 30 | 19 |
| 43 | 32 | 17 |
| 39 | 30 | 18 |
| 41 | 35 | 17 |
| 41 | 30 | 20 |

|    |    |    |
|----|----|----|
| 42 | 36 | 21 |
| 43 | 25 | 19 |
| 40 | 34 | 18 |
| 42 | 34 | 21 |
| 42 | 34 | 21 |
| 39 | 32 | 23 |
| 44 | 28 | 21 |
| 43 | 33 | 19 |
| 43 | 34 | 13 |
| 42 | 33 | 17 |
| 39 | 32 | 16 |
| 45 | 37 | 20 |
| 43 | 36 | 20 |
| 43 | 40 | 19 |
| 42 | 31 | 16 |
| 42 | 31 | 19 |
| 42 | 34 | 20 |
| 44 | 26 | 17 |
| 40 | 31 | 16 |
| 44 | 40 | 18 |
| 41 | 35 | 19 |
| 42 | 34 | 17 |
| 42 | 33 | 16 |
| 41 | 34 | 21 |
| 39 | 30 | 16 |
| 41 | 28 | 16 |
| 42 | 29 | 17 |
| 42 | 33 | 18 |
| 42 | 32 | 19 |
| 42 | 27 | 17 |
| 42 | 29 | 15 |
| 42 | 35 | 20 |
| 41 | 28 | 16 |
| 43 | 28 | 14 |
| 41 | 36 | 17 |
| 43 | 42 | 20 |
| 43 | 34 | 20 |
| 41 | 34 | 15 |
| 42 | 36 | 20 |
| 40 | 30 | 20 |
| 41 | 29 | 14 |
| 45 | 26 | 19 |
| 43 | 27 | 20 |
| 44 | 28 | 19 |
| 41 | 31 | 19 |
| 42 | 28 | 19 |
| 41 | 40 | 17 |
| 42 | 41 | 18 |
| 42 | 31 | 17 |
| 38 | 31 | 17 |
| 40 | 28 | 16 |
| 43 | 31 | 19 |
| 42 | 32 | 15 |
| 42 | 31 | 19 |
| 45 | 27 | 14 |
| 42 | 31 | 17 |
| 42 | 31 | 20 |
| 43 | 31 | 19 |
| 42 | 31 | 17 |

|    |    |    |
|----|----|----|
| 43 | 24 | 17 |
| 45 | 36 | 17 |
| 43 | 35 | 21 |
| 44 | 27 | 19 |
| 42 | 27 | 17 |
| 41 | 31 | 13 |
| 43 | 28 | 16 |
| 40 | 36 | 19 |
| 44 | 38 | 17 |
| 42 | 29 | 19 |
| 43 | 29 | 16 |
| 42 | 32 | 17 |
| 43 | 28 | 17 |
| 43 | 29 | 18 |
| 42 | 25 | 17 |
| 42 | 36 | 18 |
| 41 | 28 | 17 |
| 43 | 30 | 20 |
| 44 | 36 | 19 |
| 41 | 36 | 15 |
| 43 | 28 | 18 |
| 44 | 31 | 18 |
| 41 | 29 | 16 |
| 42 | 39 | 17 |
| 42 | 33 | 20 |
| 43 | 39 | 20 |
| 46 | 31 | 19 |
| 38 | 32 | 19 |
| 38 | 35 | 20 |
| 42 | 29 | 22 |
| 41 | 32 | 17 |
| 41 | 27 | 18 |
| 43 | 34 | 20 |
| 44 | 33 | 15 |
| 43 | 34 | 17 |
| 43 | 32 | 20 |
| 37 | 31 | 19 |
| 43 | 25 | 17 |
| 42 | 33 | 18 |
| 43 | 35 | 17 |
| 39 | 35 | 18 |
| 42 | 28 | 21 |
| 42 | 32 | 15 |
| 43 | 31 | 16 |
| 43 | 31 | 17 |
| 44 | 34 | 19 |
| 41 | 35 | 17 |
| 43 | 29 | 19 |
| 40 | 34 | 19 |
| 43 | 21 | 19 |
| 42 | 26 | 14 |
| 45 | 33 | 18 |
| 45 | 30 | 19 |
| 43 | 31 | 21 |
| 42 | 22 | 18 |
| 42 | 28 | 19 |
| 43 | 38 | 17 |
| 43 | 36 | 16 |
| 43 | 30 | 18 |

|    |    |    |
|----|----|----|
| 41 | 37 | 20 |
| 44 | 30 | 16 |
| 41 | 29 | 17 |
| 43 | 37 | 17 |
| 43 | 30 | 18 |
| 43 | 29 | 18 |
| 42 | 30 | 20 |
| 38 | 26 | 19 |
| 42 | 31 | 16 |
| 44 | 33 | 19 |
| 44 | 38 | 19 |
| 40 | 32 | 16 |
| 39 | 28 | 23 |
| 43 | 34 | 19 |
| 42 | 31 | 21 |
| 42 | 28 | 21 |
| 41 | 31 | 17 |
| 43 | 31 | 16 |
| 43 | 32 | 19 |
| 39 | 31 | 20 |
| 41 | 30 | 15 |
| 41 | 29 | 18 |
| 42 | 25 | 19 |
| 43 | 33 | 21 |
| 44 | 30 | 18 |
| 42 | 33 | 21 |
| 44 | 32 | 19 |
| 45 | 38 | 20 |
| 43 | 26 | 16 |
| 41 | 31 | 18 |
| 41 | 34 | 13 |
| 42 | 37 | 17 |
| 42 | 30 | 18 |
| 44 | 35 | 19 |
| 42 | 31 | 18 |
| 44 | 25 | 14 |
| 41 | 26 | 19 |
| 42 | 31 | 19 |
| 40 | 32 | 18 |
| 44 | 27 | 18 |
| 45 | 29 | 19 |
| 41 | 35 | 18 |
| 45 | 27 | 17 |
| 42 | 38 | 17 |
| 40 | 25 | 17 |
| 42 | 30 | 19 |
| 43 | 36 | 16 |
| 43 | 32 | 15 |
| 42 | 29 | 16 |
| 41 | 38 | 24 |
| 42 | 30 | 17 |
| 42 | 31 | 19 |
| 42 | 31 | 16 |
| 44 | 31 | 19 |
| 43 | 27 | 23 |
| 44 | 27 | 20 |
| 42 | 30 | 13 |
| 40 | 36 | 17 |
| 39 | 37 | 16 |

|    |    |    |
|----|----|----|
| 43 | 27 | 16 |
| 43 | 27 | 17 |
| 42 | 31 | 16 |
| 43 | 26 | 19 |
| 42 | 30 | 16 |
| 42 | 35 | 20 |
| 44 | 31 | 20 |
| 42 | 31 | 16 |
| 44 | 34 | 20 |
| 40 | 32 | 16 |
| 42 | 31 | 16 |
| 40 | 35 | 20 |
| 43 | 32 | 20 |
| 42 | 31 | 14 |
| 42 | 33 | 15 |
| 44 | 36 | 19 |
| 42 | 32 | 20 |
| 42 | 32 | 18 |
| 43 | 32 | 22 |
| 40 | 34 | 16 |
| 38 | 32 | 17 |
| 42 | 34 | 16 |
| 43 | 36 | 20 |
| 41 | 31 | 16 |
| 42 | 27 | 24 |
| 41 | 33 | 17 |
| 42 | 38 | 18 |
| 43 | 29 | 20 |
| 43 | 30 | 19 |





TCAGC

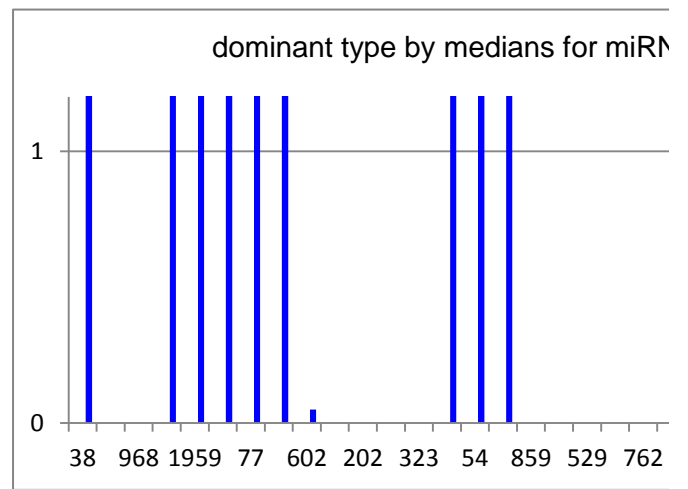







40 41 42 43 44 45 46 47 48 49 50 51 52 53 54 55  
C\_48 D\_10 D\_12 D\_13 D\_14 D\_3 D\_9 E\_20 E\_29 E\_4 E\_5 E\_6 F\_1 F\_35 F\_36 F\_37

|       |       |       |       |       |       |       |       |      |       |       |       |      |      |      |  |
|-------|-------|-------|-------|-------|-------|-------|-------|------|-------|-------|-------|------|------|------|--|
| 0.03  |       |       |       |       |       |       |       |      |       |       |       |      |      |      |  |
| 0.03  | 0.88  |       |       |       |       |       |       |      |       |       |       |      |      |      |  |
| 0.09  | 0.49  | 0.46  |       |       |       |       |       |      |       |       |       |      |      |      |  |
| -0.03 | 0.03  | -0.01 | -0.11 |       |       |       |       |      |       |       |       |      |      |      |  |
| 0.40  | 0.22  | 0.14  | 0.29  | -0.10 |       |       |       |      |       |       |       |      |      |      |  |
| -0.01 | 0.89  | 0.80  | 0.44  | -0.09 | 0.29  |       |       |      |       |       |       |      |      |      |  |
| 0.34  | -0.13 | -0.06 | 0.01  | 0.24  | -0.15 | -0.24 |       |      |       |       |       |      |      |      |  |
| 0.44  | 0.17  | 0.16  | 0.42  | -0.06 | 0.40  | 0.16  | 0.36  |      |       |       |       |      |      |      |  |
| 0.18  | -0.02 | 0.02  | 0.06  | 0.11  | 0.07  | -0.02 | 0.44  | 0.34 |       |       |       |      |      |      |  |
| 0.61  | 0.01  | 0.04  | 0.15  | -0.04 | 0.18  | -0.01 | 0.54  | 0.64 | 0.52  |       |       |      |      |      |  |
| 0.32  | -0.11 | -0.03 | 0.18  | 0.07  | 0.07  | -0.19 | 0.49  | 0.45 | 0.55  | 0.59  |       |      |      |      |  |
| -0.15 | 0.27  | 0.24  | 0.62  | -0.19 | 0.01  | 0.19  | 0.07  | 0.38 | -0.17 | 0.13  | 0.21  |      |      |      |  |
| -0.46 | 0.23  | 0.15  | 0.51  | -0.18 | -0.12 | 0.15  | -0.12 | 0.14 | -0.21 | -0.15 | -0.01 | 0.83 |      |      |  |
| 0.12  | 0.14  | 0.16  | 0.36  | 0.29  | -0.09 | -0.01 | 0.53  | 0.33 | 0.36  | 0.35  | 0.37  | 0.30 | 0.22 |      |  |
| -0.04 | -0.02 | 0.00  | 0.24  | -0.25 | 0.37  | 0.06  | -0.01 | 0.47 | 0.05  | 0.09  | 0.07  | 0.23 | 0.27 | 0.16 |  |

|       |       |       |       |       |       |       |       |       |       |       |       |       |       |       |       |
|-------|-------|-------|-------|-------|-------|-------|-------|-------|-------|-------|-------|-------|-------|-------|-------|
| -0.15 | 0.21  | 0.16  | 0.50  | -0.24 | 0.03  | 0.17  | 0.03  | 0.20  | -0.20 | 0.11  | 0.07  | 0.76  | 0.78  | 0.18  | 0.21  |
| -0.34 | -0.08 | -0.04 | 0.26  | -0.12 | -0.14 | -0.10 | 0.01  | 0.13  | -0.08 | 0.02  | 0.33  | 0.69  | 0.66  | 0.18  | 0.19  |
| -0.15 | -0.25 | -0.21 | -0.37 | 0.20  | -0.30 | -0.24 | 0.05  | -0.39 | 0.01  | -0.18 | 0.03  | -0.34 | -0.31 | -0.20 | -0.29 |
| 0.46  | 0.15  | 0.10  | 0.28  | -0.33 | 0.32  | 0.16  | 0.04  | 0.42  | -0.13 | 0.31  | 0.08  | 0.28  | 0.03  | 0.14  | 0.18  |
| 0.30  | -0.14 | -0.08 | -0.02 | 0.04  | 0.01  | -0.17 | 0.44  | 0.24  | 0.21  | 0.19  | 0.27  | -0.04 | -0.23 | 0.47  | 0.08  |
| 0.29  | -0.13 | -0.10 | -0.09 | -0.02 | -0.09 | -0.16 | 0.41  | 0.01  | 0.11  | 0.17  | 0.22  | -0.08 | -0.24 | 0.41  | -0.15 |
| -0.27 | -0.28 | -0.25 | -0.44 | 0.17  | -0.33 | -0.27 | 0.02  | -0.45 | 0.00  | -0.25 | 0.00  | -0.34 | -0.26 | -0.23 | -0.32 |
| -0.08 | 0.21  | 0.09  | 0.14  | -0.20 | 0.06  | 0.26  | -0.16 | -0.07 | -0.05 | -0.08 | -0.26 | 0.02  | 0.21  | -0.02 | 0.05  |
| -0.13 | -0.02 | -0.04 | 0.03  | -0.18 | -0.13 | 0.05  | 0.00  | -0.03 | -0.13 | -0.05 | -0.07 | 0.14  | 0.19  | 0.11  | 0.15  |
| -0.18 | -0.28 | -0.23 | -0.30 | 0.22  | -0.50 | -0.28 | 0.20  | -0.37 | 0.01  | -0.18 | 0.01  | -0.29 | -0.13 | -0.01 | -0.28 |
| 0.04  | -0.12 | -0.10 | -0.19 | 0.12  | 0.13  | -0.10 | -0.26 | 0.00  | -0.09 | -0.16 | -0.11 | -0.28 | -0.21 | -0.25 | 0.08  |
| -0.36 | -0.14 | -0.06 | -0.31 | 0.39  | -0.39 | -0.19 | 0.07  | -0.46 | 0.11  | -0.21 | 0.09  | -0.22 | -0.13 | -0.08 | -0.34 |
| -0.14 | -0.06 | -0.07 | -0.14 | 0.09  | 0.11  | -0.07 | -0.14 | -0.20 | -0.28 | -0.32 | -0.26 | -0.12 | -0.08 | -0.22 | -0.12 |
| -0.26 | -0.03 | -0.05 | -0.11 | -0.35 | -0.25 | -0.05 | -0.32 | -0.17 | -0.06 | -0.24 | -0.20 | -0.03 | 0.17  | -0.04 | 0.02  |
| 0.16  | -0.07 | -0.04 | -0.03 | 0.01  | -0.09 | -0.20 | 0.28  | 0.21  | 0.32  | 0.20  | 0.29  | 0.03  | -0.06 | 0.33  | 0.03  |
| -0.21 | -0.02 | -0.05 | 0.05  | 0.01  | 0.11  | -0.08 | -0.22 | 0.08  | 0.05  | -0.06 | -0.06 | 0.11  | 0.22  | -0.06 | 0.37  |
| 0.12  | -0.23 | -0.20 | -0.34 | 0.30  | 0.16  | -0.25 | 0.15  | -0.05 | 0.14  | 0.01  | 0.20  | -0.29 | -0.34 | -0.01 | 0.03  |
| -0.29 | -0.35 | -0.27 | -0.48 | 0.12  | -0.36 | -0.35 | -0.07 | -0.46 | 0.07  | -0.25 | -0.10 | -0.40 | -0.16 | -0.13 | -0.11 |
| 0.23  | -0.16 | -0.14 | -0.34 | 0.23  | -0.07 | -0.26 | 0.16  | -0.10 | 0.39  | 0.18  | 0.31  | -0.37 | -0.38 | 0.12  | -0.29 |
| 0.02  | 0.87  | 0.96  | 0.43  | -0.07 | 0.19  | 0.82  | -0.13 | 0.10  | 0.01  | 0.02  | -0.10 | 0.20  | 0.15  | 0.09  | -0.03 |
| 0.09  | -0.28 | -0.18 | -0.25 | 0.19  | -0.14 | -0.27 | 0.11  | 0.04  | 0.11  | 0.17  | 0.39  | -0.07 | -0.20 | 0.12  | 0.01  |
| 0.29  | -0.15 | -0.13 | -0.19 | 0.41  | 0.24  | -0.25 | 0.20  | -0.06 | -0.13 | 0.05  | 0.01  | -0.16 | -0.29 | -0.06 | -0.29 |
| 0.00  | -0.18 | -0.18 | -0.12 | -0.02 | 0.46  | -0.13 | -0.11 | 0.09  | -0.34 | -0.18 | 0.01  | 0.08  | 0.00  | -0.29 | 0.16  |
| -0.05 | -0.10 | -0.01 | -0.16 | 0.32  | -0.50 | -0.27 | 0.56  | -0.13 | 0.20  | 0.16  | 0.33  | -0.03 | -0.06 | 0.27  | -0.36 |
| 0.14  | -0.24 | -0.14 | -0.06 | 0.27  | -0.31 | -0.34 | 0.86  | 0.08  | 0.34  | 0.29  | 0.41  | -0.02 | -0.11 | 0.43  | -0.18 |
| -0.02 | 0.13  | 0.15  | 0.27  | -0.05 | -0.17 | 0.16  | 0.31  | 0.05  | 0.24  | 0.14  | -0.04 | 0.05  | 0.14  | 0.12  | -0.10 |
| 0.18  | -0.15 | -0.06 | 0.08  | 0.02  | -0.25 | -0.24 | 0.75  | 0.21  | 0.14  | 0.38  | 0.38  | 0.32  | 0.14  | 0.49  | 0.04  |
| 0.48  | 0.16  | 0.13  | 0.35  | -0.13 | 0.56  | 0.26  | 0.11  | 0.58  | 0.46  | 0.57  | 0.33  | 0.07  | -0.12 | 0.16  | 0.32  |
| 0.05  | -0.22 | -0.17 | -0.36 | 0.22  | -0.20 | -0.25 | 0.20  | -0.17 | 0.18  | 0.06  | 0.19  | -0.30 | -0.34 | -0.06 | -0.29 |
| -0.20 | -0.25 | -0.22 | -0.38 | 0.10  | -0.27 | -0.24 | 0.00  | -0.36 | 0.02  | -0.17 | -0.02 | -0.30 | -0.23 | -0.24 | -0.24 |
| 0.45  | 0.21  | 0.22  | 0.33  | 0.11  | 0.22  | 0.10  | 0.65  | 0.43  | 0.58  | 0.56  | 0.49  | 0.07  | -0.11 | 0.46  | 0.06  |
| 0.52  | -0.10 | -0.04 | 0.09  | 0.17  | -0.04 | -0.20 | 0.83  | 0.52  | 0.47  | 0.77  | 0.57  | 0.12  | -0.14 | 0.55  | 0.04  |
| 0.14  | -0.08 | 0.00  | 0.04  | 0.03  | -0.16 | -0.09 | 0.44  | 0.15  | 0.39  | 0.40  | 0.14  | -0.07 | -0.09 | 0.37  | 0.06  |
| 0.17  | -0.30 | -0.26 | -0.40 | 0.52  | 0.00  | -0.40 | 0.45  | 0.11  | 0.22  | 0.23  | 0.26  | -0.23 | -0.29 | 0.20  | -0.01 |
| 0.38  | -0.01 | 0.02  | 0.20  | 0.10  | 0.03  | -0.12 | 0.69  | 0.26  | 0.37  | 0.50  | 0.37  | 0.08  | 0.02  | 0.64  | 0.18  |
| -0.06 | -0.34 | -0.26 | -0.43 | 0.16  | -0.32 | -0.34 | 0.01  | -0.23 | -0.20 | -0.23 | -0.11 | -0.30 | -0.26 | -0.19 | -0.19 |
| 0.05  | 0.03  | -0.03 | 0.16  | 0.27  | 0.36  | 0.00  | -0.05 | 0.23  | -0.19 | 0.01  | 0.00  | 0.21  | 0.19  | 0.03  | 0.46  |
| 0.30  | 0.26  | 0.20  | 0.41  | -0.29 | 0.28  | 0.25  | 0.06  | 0.64  | -0.01 | 0.37  | 0.20  | 0.38  | 0.27  | 0.13  | 0.45  |
| -0.16 | -0.21 | -0.18 | -0.10 | 0.42  | -0.33 | -0.27 | 0.25  | -0.23 | -0.20 | -0.30 | -0.04 | -0.06 | 0.01  | 0.05  | -0.16 |
| -0.20 | 0.14  | 0.14  | 0.17  | 0.35  | -0.28 | 0.05  | 0.06  | -0.21 | -0.16 | -0.21 | 0.04  | 0.21  | 0.22  | 0.21  | -0.18 |







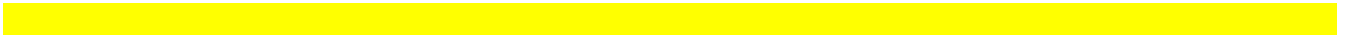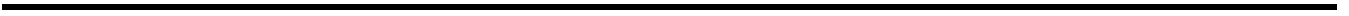



















































































































































































Two Independent Samples)

INPUT DATA & RANKS

|              | RANKS |         |        |
|--------------|-------|---------|--------|
|              | UCtru | UCpseuc | UCtrue |
|              | 44    | 37      | 166    |
|              | 44    | 26      | 166    |
|              | 43    | 25      | 140    |
|              | 43    | 19      | 140    |
|              | 44    | 25      | 166    |
|              | 45    | 34      | 189    |
|              | 44    | 32      | 166    |
|              | 43    | 26      | 140    |
|              | 45    | 30      | 189    |
|              | 42    | 17      | 117    |
|              | 45    | 28      | 189    |
|              | 45    | 22      | 189    |
| oximation)   | 44    | 38      | 166    |
| .9599639845  | 43    | 19      | 140    |
| * 1.95996398 | 41    | 42      | 105    |
|              | 41    | 27      | 105    |
|              | 43    | 29      | 140    |
|              | 43    | 22      | 140    |
|              | 42    | 26      | 117    |
| st be Reject | 44    | 30      | 166    |
|              | 44    | 26      | 166    |
|              | 43    | 16      | 140    |
|              | 43    | 28      | 140    |
|              | 42    | 25      | 117    |
|              | 44    | 23      | 166    |
|              | 43    | 27      | 140    |
|              | 43    | 32      | 140    |
|              | 44    | 27      | 166    |
|              | 43    | 35      | 140    |
|              | 43    | 33      | 140    |
|              | 44    | 16      | 166    |
|              | 43    | 23      | 140    |
|              | 44    | 26      | 166    |
|              | 45    | 52      | 189    |
|              | 45    | 34      | 189    |
|              | 42    | 27      | 117    |
|              | 45    | 23      | 189    |
|              | 43    | 16      | 140    |
|              | 44    | 19      | 166    |
|              | 41    | 13      | 105    |
|              | 44    | 23      | 166    |
|              | 42    | 33      | 117    |
|              | 45    | 22      | 189    |
|              | 43    | 25      | 140    |
|              | 44    | 23      | 166    |
|              | 42    | 34      | 117    |
|              | 42    | 27      | 117    |
|              | 44    | 27      | 166    |
|              | 44    | 21      | 166    |

The Wilcoxon Rank-Sum Test (Two Independent Samples

1000 trials

INPUT DATA

|                                          | NPtru                      | NPpseudo             |
|------------------------------------------|----------------------------|----------------------|
| Obser                                    | 1000                       | 1000                 |
| Mean:                                    | 34                         | 25                   |
| Media                                    | 34                         | 25                   |
| Stand                                    | 4                          | 7                    |
| The Test Procedure                       |                            |                      |
| Hyp                                      | 0                          |                      |
| Nb.                                      | 46                         |                      |
| Ave                                      | 43                         |                      |
| Ran                                      | ####                       |                      |
| Ran                                      | 1001                       |                      |
| Tes                                      | ####                       |                      |
| Nom                                      | 0                          |                      |
| Two-Tailed Test (Normal Approximation)   |                            |                      |
| Cri                                      | -1.95996398454005          | and 1.95996398454005 |
| Dec Reject H0 if                         | Z-Stat  > 1.95996398454005 |                      |
| Z S                                      | 28                         |                      |
| Z S                                      | 28                         |                      |
| Z S                                      | 28                         |                      |
| P-V                                      | 0                          |                      |
| Fin The Null Hypothesis Must be Rejected |                            |                      |

|    |    |     |    |    |
|----|----|-----|----|----|
| 43 | 20 | 140 | 21 | 32 |
| 40 | 37 | 100 | 96 | 37 |
| 42 | 20 | 117 | 21 | 34 |
| 44 | 17 | 166 | 10 | 32 |
| 43 | 22 | 140 | 33 | 30 |
| 42 | 34 | 117 | 91 | 34 |
| 42 | 21 | 117 | 25 | 32 |
| 43 | 22 | 140 | 33 | 30 |
| 43 | 15 | 140 | 3  | 24 |
| 43 | 27 | 140 | 69 | 39 |
| 45 | 22 | 189 | 33 | 26 |
| 41 | 27 | 105 | 69 | 32 |
| 44 | 28 | 166 | 76 | 35 |
| 43 | 23 | 140 | 42 | 31 |
| 45 | 24 | 189 | 49 | 38 |
| 42 | 19 | 117 | 16 | 33 |
| 44 | 24 | 166 | 49 | 33 |
| 42 | 26 | 117 | 60 | 35 |
| 45 | 25 | 189 | 53 | 34 |
| 45 | 24 | 189 | 49 | 33 |
| 43 | 20 | 140 | 21 | 41 |
| 45 | 23 | 189 | 42 | 36 |
| 45 | 21 | 189 | 25 | 25 |
| 41 | 26 | 105 | 60 | 35 |
| 43 | 27 | 140 | 69 | 35 |
| 45 | 29 | 189 | 80 | 37 |
| 44 | 14 | 166 | 2  | 31 |
| 40 | 30 | 100 | 83 | 35 |
| 43 | 21 | 140 | 25 | 33 |
| 43 | 24 | 140 | 49 | 35 |
| 45 | 29 | 189 | 80 | 31 |
| 44 | 27 | 166 | 69 | 33 |
| 43 | 22 | 140 | 33 | 34 |
| 44 | 18 | 166 | 12 | 30 |
| 44 | 23 | 166 | 42 | 35 |
| 42 | 23 | 117 | 42 | 33 |
| 43 | 26 | 140 | 60 | 28 |
| 42 | 22 | 117 | 33 | 33 |
| 43 | 21 | 140 | 25 | 24 |
| 42 | 19 | 117 | 16 | 30 |
| 41 | 16 | 105 | 6  | 38 |
| 41 | 18 | 105 | 12 | 37 |
| 44 | 20 | 166 | 21 | 27 |
| 45 | 29 | 189 | 80 | 36 |
| 45 | 39 | 189 | 98 | 26 |
| 45 | 16 | 189 | 6  | 34 |
| 40 | 18 | 100 | 12 | 38 |
| 45 | 28 | 189 | 76 | 30 |
| 45 | 22 | 189 | 33 | 30 |
| 45 | 36 | 189 | 94 | 41 |
| 42 | 22 | 117 | 33 | 38 |
|    |    |     |    | 28 |
|    |    |     |    | 39 |
|    |    |     |    | 37 |
|    |    |     |    | 39 |
|    |    |     |    | 37 |
|    |    |     |    | 40 |
|    |    |     |    | 40 |
|    |    |     |    | 29 |

34  
32  
30  
27  
34  
29  
31  
27  
36  
39  
31  
29  
34  
38  
32  
35  
34  
34  
34  
34  
28  
37  
34  
28  
37  
38  
34  
39  
32  
27  
35  
41  
34  
35  
36  
33  
31  
37  
36  
39  
32  
37  
32  
30  
26  
30  
31  
31  
34  
35  
34  
36  
34  
37  
36  
38  
32  
33  
30

36  
33  
34  
38  
26  
29  
36  
38  
30  
33  
40  
37  
36  
37  
34  
30  
35  
27  
34  
35  
36  
39  
34  
28  
36  
35  
39  
31  
34  
35  
29  
37  
37  
31  
34  
29  
39  
32  
38  
35  
36  
36  
33  
36  
30  
36  
28  
34  
37  
30  
30  
36  
39  
41  
32  
34  
34  
35  
32

33  
34  
31  
32  
35  
38  
35  
39  
30  
34  
33  
38  
34  
32  
28  
26  
39  
34  
34  
34  
32  
33  
31  
39  
37  
32  
34  
39  
29  
36  
36  
34  
29  
30  
38  
32  
33  
35  
40  
34  
30  
36  
35  
37  
36  
32  
33  
37  
33  
30  
42  
33  
30  
36  
36  
38  
33  
32  
39

34  
38  
31  
35  
28  
36  
26  
41  
28  
29  
34  
29  
29  
35  
31  
33  
36  
30  
31  
35  
25  
33  
31  
29  
31  
30  
31  
28  
36  
32  
36  
31  
39  
30  
28  
32  
34  
26  
30  
36  
36  
31  
36  
38  
36  
32  
37  
36  
39  
34  
32  
42  
26  
36  
32  
29  
34  
34  
36



35  
35  
27  
37  
27  
34  
28  
39  
32  
37  
29  
36  
34  
40  
34  
36  
29  
35  
33  
34  
32  
33  
30  
36  
36  
39  
37  
37  
32  
29  
31  
33  
33  
36  
39  
31  
32  
33  
35  
36  
32  
37  
26  
37  
36  
31  
32  
32  
39  
31  
34  
32  
32  
27  
40  
37  
32  
32  
27

26  
35  
47  
39  
37  
35  
35  
30  
33  
37  
39  
34  
38  
31  
39  
32  
30  
35  
32  
35  
36  
36  
31  
41  
34  
29  
35  
35  
31  
40  
40  
36  
28  
37  
34  
32  
32  
28  
32  
35  
31  
35  
28  
36  
37  
32  
29  
37  
34  
24  
36  
26  
28  
34  
26  
36  
35  
33  
37

32  
32  
34  
39  
32  
33  
29  
30  
26  
31  
36  
30  
39  
30  
33  
32  
33  
40  
37  
34  
30  
30  
33  
30  
31  
34  
30  
36  
31  
36  
33  
43  
32  
35  
30  
35  
28  
33  
31  
35  
37  
35  
44  
39  
31  
33  
31  
34  
26  
35  
34  
36  
33  
32  
39  
31  
36  
25  
29

35  
34  
32  
32  
34  
33  
32  
31  
30  
41  
41  
36  
31  
32  
37  
31  
37  
29  
29  
31  
31  
34  
29  
37  
37  
35  
28  
31  
34  
29  
38  
36  
26  
34  
36  
28  
34  
38  
38  
41  
29  
33  
32  
31  
29  
32  
29  
38  
32  
31  
32  
31  
33  
32  
36  
39  
40  
29  
34  
29  
39

34  
39  
31  
37  
32  
36  
33  
32  
33  
37  
35  
31  
36  
34  
36  
37  
43  
44  
36  
30  
36  
32  
32  
28  
36  
28  
41  
40  
38  
30  
27  
31  
34  
37  
28  
29  
32  
29  
36  
35  
31  
40  
35  
32  
28  
32  
37  
38  
32  
38  
34  
35  
37  
30  
34  
30  
36  
30  
31

29  
32  
36  
34  
32  
37  
32  
32  
35  
37  
36  
38  
33  
36  
36  
31  
36  
34  
30  
35  
33  
32  
30  
39  
35  
31  
29  
29  
28  
34  
37  
40  
42  
31  
31  
33  
28  
40  
29  
30  
42  
32  
34  
45  
33  
34  
35  
27  
31  
34  
34  
31  
28  
32  
34  
33  
40  
36  
30

30  
35  
34  
38  
32  
29  
32  
37  
39  
29  
32  
38  
31  
33  
36  
38  
29  
40  
40  
30  
31  
31  
44  
31  
40  
35  
31  
32  
38  
30  
36  
39  
38  
31  
39  
41  
35  
36  
29  
29  
34  
37  
33  
28  
22  
37  
38  
39  
32  
36  
33  
28  
26  
33  
47  
33  
29  
37  
32

31  
36  
34  
32  
37  
37  
34  
43  
35  
31  
33  
39  
28  
35  
26  
27  
45  
30  
29  
36  
29  
31  
37  
35  
31  
31  
36  
34  
33  
39  
38  
35  
32  
34  
32  
32  
33  
39  
34  
35  
36  
41  
31  
32  
42  
39  
38  
26  
36  
36  
29  
38  
30  
30  
36  
32  
33  
33  
32



37  
35  
31  
37  
33  
28  
36  
35  
28  
33  
37  
34  
35  
34  
40  
32  
30  
36  
39  
37  
32  
42  
38  
41  
35  
29  
37  
35  
25  
37  
31  
29  
29  
32  
32  
37  
40  
37  
32  
28  
32  
35  
28  
34  
30  
41  
35  
32  
27  
29  
33  
36  
38  
28  
38  
31  
33  
32  
40

36  
37  
31  
31  
36  
38  
31  
32  
33  
32  
33  
29  
38  
36  
26  
36  
39  
35  
33  
29  
38  
31  
32  
33  
37  
37  
32  
31  
32  
27  
37  
37  
31  
28  
34  
38  
42  
34  
37  
33  
32  
34  
31  
41  
25  
28  
36  
30  
31  
31  
34  
30  
33  
29  
36  
36  
38  
43  
33  
30

32  
29  
37  
32  
33  
35  
29  
33  
28  
36  
35  
34  
29  
32  
34  
30  
28  
27  
30  
35  
29  
35  
36  
36  
39  
34  
33  
35  
31  
29  
38  
34  
38  
38  
32  
32  
33  
30  
40  
34  
34  
38  
33  
28  
38  
43  
41  
37  
34  
34  
35  
34  
38  
37  
36  
36  
28  
33  
33

25  
39  
30  
37  
24  
37  
26

34  
36  
26  
34  
36  
28  
34  
38  
41  
29  
33  
32  
31  
29  
32  
29

38  
32  
31  
32  
31  
33  
32  
36  
39  
40  
29  
34  
29  
39  
34  
39  
31  
37  
32  
36  
33  
32  
33  
37  
35  
31  
36  
34  
36  
37  
43  
44  
36  
30  
36  
32  
32  
28  
36  
28  
41  
40  
38  
30  
27  
31  
34  
37  
28  
29  
32  
29  
36  
35  
31  
40  
35  
32  
28

32  
37  
38  
32  
38  
34  
35  
37  
30  
34  
30  
36  
30  
31  
29  
32  
36  
34  
32  
37  
32  
32  
35  
37  
36  
38  
33  
36  
36  
31  
36  
34  
30  
35  
33  
32  
30  
39  
35  
31  
29  
29  
28  
34  
37  
40  
42  
31  
31  
33  
28  
40  
29  
30  
42  
32  
34  
45  
33

34  
35  
27  
31  
34  
34  
31  
28  
32  
34  
33  
40  
36  
30  
30  
35  
34  
38  
32  
29  
32  
37  
39  
29  
32  
38  
31  
33  
36  
38  
29  
40  
40  
30  
31  
31  
44  
31  
40  
35  
31  
32  
38  
30  
36  
39  
38  
31  
39  
41  
35  
36  
29  
29  
34  
37  
33  
28  
22



37  
38  
39  
32  
36  
33  
28  
26  
33  
47  
33  
29  
37  
32  
31  
36  
34  
32  
37  
37  
34  
43  
35  
31  
33  
39  
28  
35  
26  
27  
45  
30  
29  
36  
29  
31  
37  
35  
31  
31  
36  
34  
33  
39  
38  
35  
32  
34  
32  
32  
33  
39  
34  
35  
36  
41  
31  
32  
42

39  
38  
26  
36  
36  
29  
38  
30  
30  
36  
32  
33  
33  
32  
37  
35  
31  
37  
33  
28  
36  
35  
28  
33  
37  
34  
35  
34  
40  
32  
30  
36  
39  
37  
32  
42  
38  
41  
35  
29  
37  
35  
25  
37  
31  
29  
29  
32  
32  
37  
40  
37  
32  
28  
32  
35  
28  
34  
30

41  
35  
32  
27  
29  
33  
36  
38  
28  
38  
31  
33  
32  
40  
36  
37  
31  
31  
36  
38  
31  
32  
33  
32  
33  
29  
38  
36  
26  
36  
39  
35  
33  
29  
38  
31  
32  
33  
37  
32  
31  
32  
27  
37  
37  
31  
28  
34  
38  
42  
34  
37  
33  
32  
34  
31  
41  
25  
28

36  
30  
31  
31  
34  
30  
33  
29  
36  
36  
38  
43  
33  
30  
32  
29  
37  
32  
33  
35  
29  
33  
28  
36  
35  
34  
29  
32  
34  
30  
28  
27  
30  
35  
29  
35  
36  
36  
39  
34  
33  
35  
31  
29  
38  
34  
38  
38  
32  
32  
33  
30  
40  
34  
34  
38  
33  
28  
38

43  
41  
37  
34  
34  
35  
34  
38  
37  
36  
36  
28  
33  
33  
25  
39  
30  
37  
24  
37  
26



√As with 1E5 to 1E6 total reads over 93 samples

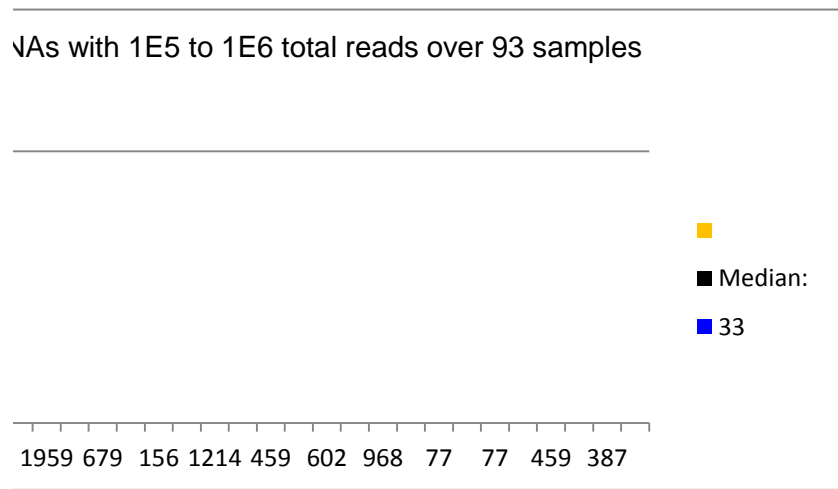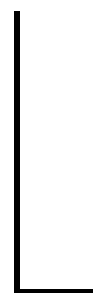









56 57 58 59 60 61 62 63 64 65 66 67 68 69 70 71  
F\_38 F\_39 G\_3 G\_30 G\_31 G\_32 G\_4 G\_5 G\_6 G\_7 A\_10 A\_12 A\_18 A\_3 A\_5 A\_6



0.55  
-0.34 -0.13  
0.18 0.07 -0.30  
-0.24 -0.06 -0.01 0.48  
-0.20 0.01 0.06 0.41 0.82  
-0.30 -0.08 0.93 -0.36 -0.07 0.01  
0.39 -0.09 -0.08 0.11 -0.13 -0.15 -0.03  
0.26 0.21 0.05 0.16 0.14 0.10 0.10 0.61  
-0.11 -0.04 0.44 -0.25 0.03 0.04 0.46 0.19 0.38  
-0.28 -0.12 0.03 -0.04 -0.15 -0.29 -0.01 -0.05 -0.11 0.10  
-0.21 0.07 0.36 -0.42 -0.14 -0.11 0.43 -0.14 -0.08 0.39 0.04  
-0.05 -0.13 -0.13 -0.08 -0.04 -0.04 -0.07 -0.15 -0.25 -0.07 0.08 0.15  
-0.05 0.06 -0.18 0.12 0.19 0.16 -0.15 0.07 0.06 0.04 0.19 -0.08 -0.03  
-0.16 0.08 -0.13 0.21 0.54 0.41 -0.14 -0.24 -0.16 -0.03 0.14 0.06 -0.02 0.55  
0.07 0.25 -0.15 -0.04 -0.24 -0.37 -0.15 0.00 0.01 -0.17 0.44 0.14 -0.01 0.28 0.29  
-0.30 -0.02 0.19 -0.16 0.15 0.13 0.24 -0.21 -0.06 0.07 0.24 0.20 0.10 -0.20 0.06 0.05  
-0.26 0.03 0.27 -0.43 -0.13 -0.13 0.38 0.01 0.14 0.41 0.24 0.57 -0.04 0.17 0.05 0.29  
-0.44 -0.15 0.26 -0.15 0.15 0.23 0.25 -0.25 -0.23 0.07 0.12 0.26 -0.16 -0.01 0.30 0.03  
0.17 -0.08 -0.23 0.13 -0.11 -0.10 -0.26 0.15 -0.07 -0.25 -0.12 -0.08 -0.04 0.01 -0.06 -0.06  
-0.30 0.30 0.32 0.05 0.20 0.18 0.27 -0.34 0.05 0.28 0.30 0.14 -0.34 -0.07 0.17 0.09  
-0.12 -0.21 0.05 -0.02 0.02 0.04 0.07 -0.25 -0.33 -0.02 0.13 0.12 0.56 -0.40 -0.06 -0.18  
0.08 0.18 -0.08 0.07 -0.06 -0.11 -0.02 -0.16 -0.01 -0.20 0.20 -0.07 0.41 -0.24 -0.16 0.05  
-0.04 0.01 0.33 -0.34 0.09 0.13 0.35 -0.20 -0.09 0.42 -0.13 0.41 -0.06 -0.08 0.23 -0.17  
0.00 -0.02 0.18 -0.17 0.34 0.32 0.17 -0.15 0.03 0.46 -0.24 0.21 -0.06 -0.30 0.11 -0.38  
0.27 -0.17 -0.10 -0.10 -0.06 -0.11 -0.11 0.29 0.04 0.31 -0.24 -0.08 -0.02 -0.03 -0.06 -0.26  
0.26 0.27 0.01 0.15 0.38 0.39 0.00 -0.15 0.12 0.17 -0.27 0.05 -0.07 -0.14 0.22 -0.13  
-0.01 -0.05 -0.24 0.24 0.06 -0.02 -0.31 0.04 0.01 -0.34 -0.04 -0.40 -0.30 -0.24 -0.02 0.00  
-0.27 -0.15 0.82 -0.28 0.00 0.05 0.76 -0.05 -0.01 0.24 -0.02 0.27 -0.15 -0.31 -0.12 -0.20  
-0.26 -0.09 0.87 -0.36 -0.13 -0.05 0.89 -0.04 0.03 0.31 0.00 0.31 -0.09 -0.15 -0.17 -0.10  
0.05 -0.12 -0.11 0.09 0.27 0.19 -0.18 -0.05 -0.13 -0.02 -0.18 -0.10 -0.17 -0.27 0.18 -0.15  
0.06 0.02 -0.01 0.20 0.39 0.35 -0.09 -0.14 0.04 0.10 -0.17 -0.05 -0.29 -0.27 0.30 -0.06  
-0.02 0.04 -0.03 0.00 0.23 0.20 -0.03 0.01 0.14 0.20 -0.14 0.07 -0.10 0.03 0.18 0.04  
-0.17 -0.13 0.21 -0.17 0.10 0.01 0.25 -0.22 -0.18 0.20 0.17 0.25 0.02 -0.37 0.07 0.00  
0.16 -0.04 -0.11 0.15 0.35 0.34 -0.18 0.01 -0.02 0.16 -0.21 -0.09 -0.14 -0.15 0.24 -0.13  
-0.32 -0.06 0.37 -0.14 0.04 0.04 0.38 -0.17 -0.01 0.47 0.47 0.08 0.02 0.08 0.03 -0.03  
0.29 0.18 -0.14 0.04 -0.24 -0.33 -0.15 0.03 -0.10 -0.22 0.22 -0.07 0.10 -0.29 -0.18 0.41  
0.38 0.16 -0.39 0.46 0.02 -0.13 -0.44 0.16 0.18 -0.29 0.02 -0.47 -0.38 0.06 0.08 0.16  
0.00 0.01 0.30 -0.25 -0.01 -0.05 0.31 0.12 0.25 0.67 0.07 0.23 0.19 -0.25 -0.17 -0.17  
0.21 0.25 0.08 -0.06 0.01 -0.03 0.13 0.30 0.39 0.30 -0.04 0.48 0.07 -0.14 -0.10 0.01





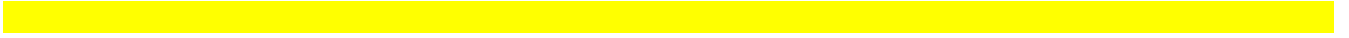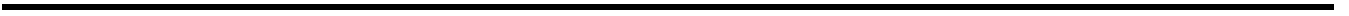



















































































































































































```

)
& RANKS
      RANKS
NPpse NPtru NPpseudo
26 1335 602
29 968 859
15 1970 38
32 1084 1214
30 1877 968
25 1752 529
42 1084 1959
36 1447 1654
17 762 77
32 1752 1214
26 1985 602
21 1447 260
20 1214 202
32 1084 1214
22 1824 323
20 1877 202
16 1942 54
18 602 114
29 859 859
28 762 762
25 1917 529
37 1214 1752
28 1214 762
27 1335 679
42 1877 1959
25 1447 529
27 762 679
19 1553 156
19 1654 156
15 1654 38
32 1335 1214
21 1654 260
24 1553 459
21 679 260
26 1824 602
29 968 859
30 679 968
19 1752 156
17 1214 77
39 1084 1877
17 968 77
15 1917 38
24 602 459
25 1214 529
23 1084 387
21 1335 260
33 1335 1335
25 1447 529
25 859 529

The Wilcoxon Rank-Sum Test (Two Independent Samples)
100 trials
      NPtru NPpseudo
Observ 100 100
Mean: 33 25
Median 33 25
Standard 4 7
The Test Procedure
Hypc 0
Nb. 31
Aver 6
Rank ####
Rank 101
Test ####
Nomi 0

Two-Tailed Test (Normal Approximation)
Crit -1.95996398454005 and 1.9599639845
Deci Reject H0 if |Z-Stat| > 1.95996398
Z St 8
Z St 8
Z St 8
P-V = 0
Fin The Null Hypothesis Must be Rejected

INPUT DATA & RANKS
      RANKS
NPtru NPpse NPtru NPpseudo
33 26 136 67
30 29 99 89
43 15 199 3
31 32 110 122
39 30 189 99
37 25 175 56
31 42 110 198
34 36 148 167
28 17 83 10
37 32 175 122
45 26 200 67
34 21 148 29
32 20 122 24
31 32 110 122
38 22 183 35
39 20 189 24
41 16 195 6
26 18 67 15
29 29 89 89
28 28 83 83
40 25 193 56
32 37 122 175
32 28 122 83
33 27 136 75
39 42 189 198
34 25 148 56
28 27 83 75
35 19 159 20
36 19 167 20
36 15 167 3
33 32 136 122
36 21 167 29
35 24 159 46
27 21 75 29
38 26 183 67
30 29 99 89
27 30 75 99
37 19 175 20
32 17 122 10
31 39 110 189
30 17 99 10
40 15 193 3
26 24 67 46
32 25 122 56
31 23 110 41
33 21 136 29
33 33 136 136
34 25 148 56
29 25 89 56

```



22 1214 323  
20 1752 202  
26 1447 602  
30 1214 968  
38 968 1824  
18 1447 114  
28 1214 762  
19 968 156  
32 459 1214  
16 1877 54  
18 602 114  
22 1214 323  
12 1553 11  
23 1084 387  
19 1824 156  
38 1335 1824  
30 1335 968  
25 1553 529  
26 1447 602  
36 1335 1654  
25 1942 529  
25 1654 529  
34 529 1447  
21 1553 260  
34 1553 1447  
17 1752 77  
30 1084 968  
28 1553 762  
32 1335 1214  
31 1553 1084  
37 1084 1752  
24 1335 459  
18 1447 114  
26 968 602  
35 1553 1553  
22 1335 323  
24 762 459  
25 1335 529  
23 459 387  
27 968 679  
16 1824 54  
22 1752 323  
27 679 679  
21 1654 260  
22 602 323  
19 1447 156  
25 1824 529  
22 968 323  
23 968 387  
24 1942 459  
17 1824 77  
25 762 529  
40 1877 1917  
21 1752 260  
31 1877 1084  
25 1752 529  
22 1917 323  
26 1917 602  
28 859 762

32 22 122 35  
37 20 175 24  
34 26 148 67  
32 30 122 99  
30 38 99 183  
34 18 148 15  
32 28 122 83  
30 19 99 20  
24 32 46 122  
39 16 189 6  
26 18 67 15  
32 22 122 35  
35 12 159 1  
31 23 110 41  
38 19 183 20  
33 38 136 183  
33 30 136 99  
35 25 159 56  
34 26 148 67  
33 36 136 167  
41 25 195 56  
36 25 167 56  
25 34 56 148  
35 21 159 29  
35 34 159 148  
37 17 175 10  
31 30 110 99  
35 28 159 83  
33 32 136 122  
35 31 159 110  
31 37 110 175  
33 24 136 46  
34 18 148 15  
30 26 99 67  
35 35 159 159  
33 22 136 35  
28 24 83 46  
33 25 136 56  
24 23 46 41  
30 27 99 75  
38 16 183 6  
37 22 175 35  
27 27 75 75  
36 21 167 29  
26 22 67 35  
34 19 148 20  
38 25 183 56  
30 22 99 35  
30 23 99 41  
41 24 195 46  
38 17 183 10

|    |      |      |
|----|------|------|
| 29 | 1447 | 859  |
| 26 | 1214 | 602  |
| 24 | 968  | 459  |
| 24 | 679  | 459  |
| 36 | 1447 | 1654 |
| 25 | 859  | 529  |
| 29 | 1084 | 859  |
| 22 | 679  | 323  |
| 18 | 1654 | 114  |
| 31 | 1877 | 1084 |
| 23 | 1084 | 387  |
| 30 | 859  | 968  |
| 17 | 1447 | 77   |
| 28 | 1824 | 762  |
| 23 | 1214 | 387  |
| 20 | 1553 | 202  |
| 27 | 1447 | 679  |
| 35 | 1447 | 1553 |
| 20 | 1447 | 202  |
| 17 | 1447 | 77   |
| 42 | 762  | 1959 |
| 27 | 1752 | 679  |
| 19 | 1447 | 156  |
| 31 | 762  | 1084 |
| 24 | 1752 | 459  |
| 25 | 1824 | 529  |
| 24 | 1447 | 459  |
| 17 | 1877 | 77   |
| 24 | 1214 | 459  |
| 13 | 679  | 17   |
| 26 | 1553 | 602  |
| 22 | 1942 | 323  |
| 26 | 1447 | 602  |
| 19 | 1553 | 156  |
| 32 | 1654 | 1214 |
| 35 | 1335 | 1553 |
| 28 | 1084 | 762  |
| 17 | 1752 | 77   |
| 20 | 1654 | 202  |
| 29 | 1877 | 859  |
| 28 | 1214 | 762  |
| 17 | 1752 | 77   |
| 29 | 1214 | 859  |
| 33 | 968  | 1335 |
| 26 | 602  | 602  |
| 25 | 968  | 529  |
| 26 | 1084 | 602  |
| 31 | 1084 | 1084 |
| 21 | 1447 | 260  |
| 26 | 1553 | 602  |
| 23 | 1447 | 387  |
| 22 | 1654 | 323  |
| 20 | 1447 | 202  |
| 24 | 1752 | 459  |
| 37 | 1654 | 1752 |
| 57 | 1824 | 2000 |
| 27 | 1214 | 679  |
| 24 | 1335 | 459  |
| 25 | 968  | 529  |

|    |      |      |
|----|------|------|
| 33 | 1654 | 1335 |
| 19 | 1335 | 156  |
| 21 | 1447 | 260  |
| 29 | 1824 | 859  |
| 21 | 602  | 260  |
| 29 | 859  | 859  |
| 18 | 1654 | 114  |
| 23 | 1824 | 387  |
| 28 | 968  | 762  |
| 29 | 1335 | 859  |
| 32 | 1917 | 1214 |
| 31 | 1752 | 1084 |
| 24 | 1654 | 459  |
| 35 | 1752 | 1553 |
| 27 | 1447 | 679  |
| 30 | 968  | 968  |
| 20 | 1553 | 202  |
| 22 | 679  | 323  |
| 14 | 1447 | 24   |
| 22 | 1553 | 323  |
| 24 | 1654 | 459  |
| 45 | 1877 | 1985 |
| 24 | 1447 | 459  |
| 15 | 762  | 38   |
| 23 | 1654 | 387  |
| 28 | 1553 | 762  |
| 26 | 1877 | 602  |
| 11 | 1084 | 7    |
| 18 | 1447 | 114  |
| 24 | 1553 | 459  |
| 27 | 859  | 679  |
| 14 | 1752 | 24   |
| 30 | 1752 | 968  |
| 22 | 1084 | 323  |
| 29 | 1447 | 859  |
| 22 | 859  | 323  |
| 15 | 1877 | 38   |
| 18 | 1214 | 114  |
| 21 | 1824 | 260  |
| 30 | 1553 | 968  |
| 25 | 1654 | 529  |
| 49 | 1654 | 1996 |
| 20 | 1335 | 202  |
| 30 | 1654 | 968  |
| 17 | 968  | 77   |
| 31 | 1654 | 1084 |
| 26 | 762  | 602  |
| 23 | 1447 | 387  |
| 24 | 1752 | 459  |
| 44 | 968  | 1978 |
| 21 | 968  | 260  |
| 22 | 1654 | 323  |
| 30 | 1877 | 968  |
| 29 | 1942 | 859  |
| 31 | 1214 | 1084 |
| 32 | 1447 | 1214 |
| 25 | 1447 | 529  |
| 24 | 1553 | 459  |
| 30 | 1214 | 968  |

|    |      |      |
|----|------|------|
| 22 | 1335 | 323  |
| 20 | 1447 | 202  |
| 19 | 1084 | 156  |
| 21 | 1214 | 260  |
| 23 | 1553 | 387  |
| 30 | 1824 | 968  |
| 28 | 1553 | 762  |
| 36 | 1877 | 1654 |
| 33 | 968  | 1335 |
| 22 | 1447 | 323  |
| 29 | 1335 | 859  |
| 30 | 1824 | 968  |
| 18 | 1447 | 114  |
| 24 | 1214 | 459  |
| 23 | 762  | 387  |
| 28 | 602  | 762  |
| 18 | 1877 | 114  |
| 18 | 1447 | 114  |
| 22 | 1447 | 323  |
| 16 | 1447 | 54   |
| 28 | 1214 | 762  |
| 24 | 1335 | 459  |
| 17 | 1084 | 77   |
| 48 | 1877 | 1995 |
| 24 | 1752 | 459  |
| 25 | 1214 | 529  |
| 31 | 1447 | 1084 |
| 19 | 1877 | 156  |
| 13 | 859  | 17   |
| 33 | 1654 | 1335 |
| 20 | 1654 | 202  |
| 27 | 1447 | 679  |
| 18 | 859  | 114  |
| 52 | 968  | 1998 |
| 26 | 1824 | 602  |
| 21 | 1214 | 260  |
| 36 | 1335 | 1654 |
| 26 | 1553 | 602  |
| 27 | 1917 | 679  |
| 25 | 1447 | 529  |
| 22 | 968  | 323  |
| 9  | 1654 | 2    |
| 20 | 1553 | 202  |
| 26 | 1752 | 602  |
| 26 | 1654 | 602  |
| 27 | 1214 | 679  |
| 25 | 1335 | 529  |
| 21 | 1752 | 260  |
| 22 | 1335 | 323  |
| 28 | 968  | 762  |
| 26 | 1959 | 602  |
| 28 | 1335 | 762  |
| 23 | 968  | 387  |
| 25 | 1654 | 529  |
| 24 | 1654 | 459  |
| 22 | 1824 | 323  |
| 22 | 1335 | 323  |
| 23 | 1214 | 387  |
| 23 | 1877 | 387  |

|    |      |      |
|----|------|------|
| 25 | 1447 | 529  |
| 32 | 1824 | 1214 |
| 24 | 1084 | 459  |
| 21 | 1553 | 260  |
| 18 | 762  | 114  |
| 27 | 1654 | 679  |
| 19 | 602  | 156  |
| 19 | 1942 | 156  |
| 39 | 762  | 1877 |
| 25 | 859  | 529  |
| 31 | 1447 | 1084 |
| 24 | 859  | 459  |
| 14 | 859  | 24   |
| 36 | 1553 | 1654 |
| 33 | 1084 | 1335 |
| 23 | 1335 | 387  |
| 40 | 1654 | 1917 |
| 25 | 968  | 529  |
| 27 | 1084 | 679  |
| 23 | 1553 | 387  |
| 56 | 529  | 1999 |
| 29 | 1335 | 859  |
| 26 | 1084 | 602  |
| 21 | 859  | 260  |
| 18 | 1084 | 114  |
| 19 | 968  | 156  |
| 28 | 1084 | 762  |
| 18 | 762  | 114  |
| 21 | 1654 | 260  |
| 26 | 1214 | 602  |
| 20 | 1654 | 202  |
| 23 | 1084 | 387  |
| 22 | 1877 | 323  |
| 17 | 968  | 77   |
| 21 | 762  | 260  |
| 19 | 1214 | 156  |
| 22 | 1447 | 323  |
| 27 | 602  | 679  |
| 26 | 968  | 602  |
| 35 | 1654 | 1553 |
| 24 | 1654 | 459  |
| 30 | 1084 | 968  |
| 29 | 1654 | 859  |
| 40 | 1824 | 1917 |
| 15 | 1654 | 38   |
| 29 | 1214 | 859  |
| 23 | 1752 | 387  |
| 20 | 1654 | 202  |
| 24 | 1877 | 459  |
| 20 | 1447 | 202  |
| 27 | 1214 | 679  |
| 28 | 1959 | 762  |
| 34 | 602  | 1447 |
| 31 | 1654 | 1084 |
| 30 | 1214 | 968  |
| 20 | 859  | 202  |
| 17 | 1447 | 77   |
| 38 | 1447 | 1824 |
| 24 | 1654 | 459  |

|    |      |      |
|----|------|------|
| 26 | 1553 | 602  |
| 26 | 1553 | 602  |
| 14 | 679  | 24   |
| 21 | 1752 | 260  |
| 29 | 679  | 859  |
| 33 | 1447 | 1335 |
| 44 | 762  | 1978 |
| 25 | 1877 | 529  |
| 21 | 1214 | 260  |
| 33 | 1752 | 1335 |
| 22 | 859  | 323  |
| 38 | 1654 | 1824 |
| 25 | 1447 | 529  |
| 15 | 1917 | 38   |
| 41 | 1447 | 1942 |
| 27 | 1654 | 679  |
| 26 | 859  | 602  |
| 21 | 1553 | 260  |
| 21 | 1335 | 260  |
| 34 | 1447 | 1447 |
| 27 | 1214 | 679  |
| 21 | 1335 | 260  |
| 15 | 968  | 38   |
| 35 | 1654 | 1553 |
| 31 | 1654 | 1084 |
| 22 | 1877 | 323  |
| 8  | 1752 | 1    |
| 32 | 1752 | 1214 |
| 29 | 1214 | 859  |
| 18 | 859  | 114  |
| 29 | 1084 | 859  |
| 33 | 1335 | 1335 |
| 20 | 1335 | 202  |
| 17 | 1654 | 77   |
| 14 | 1877 | 24   |
| 23 | 1084 | 387  |
| 24 | 1214 | 459  |
| 23 | 1335 | 387  |
| 25 | 1553 | 529  |
| 20 | 1654 | 202  |
| 35 | 1214 | 1553 |
| 26 | 1752 | 602  |
| 25 | 602  | 529  |
| 21 | 1752 | 260  |
| 17 | 1654 | 77   |
| 31 | 1084 | 1084 |
| 26 | 1214 | 602  |
| 32 | 1214 | 1214 |
| 12 | 1877 | 11   |
| 23 | 1084 | 387  |
| 43 | 1447 | 1970 |
| 21 | 1214 | 260  |
| 10 | 1214 | 4    |
| 33 | 679  | 1335 |
| 26 | 1917 | 602  |
| 30 | 1752 | 968  |
| 30 | 1214 | 968  |
| 21 | 1214 | 260  |
| 31 | 679  | 1084 |

|    |      |      |
|----|------|------|
| 28 | 602  | 762  |
| 24 | 1553 | 459  |
| 29 | 1993 | 859  |
| 19 | 1877 | 156  |
| 24 | 1752 | 459  |
| 27 | 1553 | 679  |
| 16 | 1553 | 54   |
| 26 | 968  | 602  |
| 28 | 1335 | 762  |
| 23 | 1752 | 387  |
| 24 | 1877 | 459  |
| 30 | 1447 | 968  |
| 23 | 1824 | 387  |
| 35 | 1084 | 1553 |
| 24 | 1877 | 459  |
| 18 | 1214 | 114  |
| 27 | 968  | 679  |
| 21 | 1553 | 260  |
| 29 | 1214 | 859  |
| 31 | 1553 | 1084 |
| 27 | 1654 | 679  |
| 18 | 1654 | 114  |
| 37 | 1084 | 1752 |
| 22 | 1942 | 323  |
| 41 | 1447 | 1942 |
| 11 | 859  | 7    |
| 28 | 1553 | 762  |
| 19 | 1553 | 156  |
| 28 | 1084 | 762  |
| 39 | 1917 | 1877 |
| 23 | 1917 | 387  |
| 23 | 1654 | 387  |
| 29 | 762  | 859  |
| 21 | 1752 | 260  |
| 29 | 1447 | 859  |
| 32 | 1214 | 1214 |
| 34 | 1214 | 1447 |
| 22 | 762  | 323  |
| 30 | 1214 | 968  |
| 28 | 1553 | 762  |
| 33 | 1084 | 1335 |
| 13 | 1553 | 17   |
| 41 | 762  | 1942 |
| 35 | 1654 | 1553 |
| 24 | 1752 | 459  |
| 12 | 1214 | 11   |
| 25 | 859  | 529  |
| 19 | 1752 | 156  |
| 29 | 1447 | 859  |
| 29 | 459  | 859  |
| 19 | 1654 | 156  |
| 23 | 602  | 387  |
| 26 | 762  | 602  |
| 31 | 1447 | 1084 |
| 21 | 602  | 260  |
| 25 | 1654 | 529  |
| 20 | 1553 | 202  |
| 23 | 1335 | 387  |
| 35 | 1752 | 1553 |

|    |      |      |
|----|------|------|
| 24 | 1214 | 459  |
| 25 | 1214 | 529  |
| 20 | 1447 | 202  |
| 27 | 1877 | 679  |
| 20 | 1214 | 202  |
| 36 | 1335 | 1654 |
| 24 | 859  | 459  |
| 29 | 968  | 859  |
| 22 | 602  | 323  |
| 26 | 1084 | 602  |
| 14 | 1654 | 24   |
| 22 | 968  | 323  |
| 30 | 1877 | 968  |
| 31 | 968  | 1084 |
| 20 | 1335 | 202  |
| 27 | 1214 | 679  |
| 28 | 1335 | 762  |
| 27 | 1917 | 679  |
| 19 | 1752 | 156  |
| 33 | 1447 | 1335 |
| 23 | 968  | 387  |
| 20 | 968  | 202  |
| 44 | 1335 | 1978 |
| 19 | 968  | 156  |
| 22 | 1084 | 323  |
| 27 | 1447 | 679  |
| 20 | 968  | 202  |
| 21 | 1654 | 260  |
| 24 | 1084 | 459  |
| 27 | 1654 | 679  |
| 26 | 1335 | 602  |
| 24 | 1970 | 459  |
| 18 | 1214 | 114  |
| 32 | 1553 | 1214 |
| 14 | 968  | 24   |
| 21 | 1553 | 260  |
| 20 | 762  | 202  |
| 30 | 1335 | 968  |
| 42 | 1084 | 1959 |
| 35 | 1553 | 1553 |
| 24 | 1752 | 459  |
| 27 | 1553 | 679  |
| 23 | 1978 | 387  |
| 29 | 1877 | 859  |
| 28 | 1084 | 762  |
| 25 | 1335 | 529  |
| 23 | 1084 | 387  |
| 32 | 1447 | 1214 |
| 20 | 602  | 202  |
| 19 | 1553 | 156  |
| 30 | 1447 | 968  |
| 24 | 1654 | 459  |
| 19 | 1335 | 156  |
| 21 | 1214 | 260  |
| 16 | 1877 | 54   |
| 45 | 1084 | 1985 |
| 15 | 1654 | 38   |
| 29 | 529  | 859  |
| 15 | 859  | 38   |



|    |      |      |
|----|------|------|
| 34 | 1553 | 1447 |
| 46 | 1447 | 1990 |
| 18 | 1214 | 114  |
| 18 | 1214 | 114  |
| 18 | 1447 | 114  |
| 17 | 1335 | 77   |
| 46 | 1214 | 1990 |
| 19 | 1084 | 156  |
| 21 | 968  | 260  |
| 26 | 1942 | 602  |
| 27 | 1654 | 679  |
| 27 | 1084 | 679  |
| 31 | 1214 | 1084 |
| 16 | 1752 | 54   |
| 20 | 1084 | 202  |
| 32 | 1752 | 1214 |
| 34 | 859  | 1447 |
| 22 | 859  | 323  |
| 26 | 1084 | 602  |
| 23 | 1084 | 387  |
| 14 | 1447 | 24   |
| 18 | 859  | 114  |
| 45 | 1752 | 1985 |
| 25 | 1553 | 529  |
| 19 | 762  | 156  |
| 27 | 1084 | 679  |
| 20 | 1447 | 202  |
| 21 | 859  | 260  |
| 15 | 1824 | 38   |
| 31 | 1654 | 1084 |
| 16 | 602  | 54   |
| 24 | 1447 | 459  |
| 18 | 1654 | 114  |
| 24 | 762  | 459  |
| 19 | 1447 | 156  |
| 17 | 1824 | 77   |
| 22 | 1942 | 323  |
| 37 | 859  | 1752 |
| 12 | 1335 | 11   |
| 28 | 1214 | 762  |
| 20 | 1084 | 202  |
| 27 | 859  | 679  |
| 32 | 1214 | 1214 |
| 18 | 859  | 114  |
| 27 | 1824 | 679  |
| 28 | 1214 | 762  |
| 21 | 1084 | 260  |
| 25 | 1214 | 529  |
| 22 | 1084 | 323  |
| 29 | 1335 | 859  |
| 16 | 1214 | 54   |
| 21 | 1654 | 260  |
| 27 | 1877 | 679  |
| 20 | 1917 | 202  |
| 17 | 859  | 77   |
| 25 | 1447 | 529  |
| 17 | 859  | 77   |
| 34 | 1877 | 1447 |

|    |      |      |
|----|------|------|
| 20 | 1447 | 202  |
| 32 | 1877 | 1214 |
| 33 | 1084 | 1335 |
| 22 | 1752 | 323  |
| 25 | 1214 | 529  |
| 23 | 1654 | 387  |
| 26 | 1335 | 602  |
| 24 | 1214 | 459  |
| 29 | 1335 | 859  |
| 20 | 1752 | 202  |
| 18 | 1553 | 114  |
| 33 | 1084 | 1335 |
| 32 | 1654 | 1214 |
| 25 | 1447 | 529  |
| 18 | 1654 | 114  |
| 24 | 1752 | 459  |
| 25 | 1970 | 529  |
| 29 | 1978 | 859  |
| 20 | 1654 | 202  |
| 22 | 968  | 323  |
| 24 | 1654 | 459  |
| 24 | 1214 | 459  |
| 30 | 1214 | 968  |
| 20 | 762  | 202  |
| 18 | 1654 | 114  |
| 23 | 762  | 387  |
| 17 | 1942 | 77   |
| 28 | 1917 | 762  |
| 31 | 1824 | 1084 |
| 20 | 968  | 202  |
| 23 | 679  | 387  |
| 23 | 1084 | 387  |
| 25 | 1447 | 529  |
| 25 | 1752 | 529  |
| 18 | 762  | 114  |
| 20 | 859  | 202  |
| 25 | 1214 | 529  |
| 22 | 859  | 323  |
| 26 | 1654 | 602  |
| 23 | 1553 | 387  |
| 15 | 1084 | 38   |
| 33 | 1917 | 1335 |
| 33 | 1553 | 1335 |
| 18 | 1214 | 114  |
| 29 | 762  | 859  |
| 21 | 1214 | 260  |
| 24 | 1752 | 459  |
| 23 | 1824 | 387  |
| 26 | 1214 | 602  |
| 23 | 1824 | 387  |
| 25 | 1447 | 529  |
| 31 | 1553 | 1084 |
| 28 | 1752 | 762  |
| 20 | 968  | 202  |
| 30 | 1447 | 968  |
| 24 | 968  | 459  |
| 35 | 1654 | 1553 |
| 33 | 968  | 1335 |
| 30 | 1084 | 968  |

|    |      |      |
|----|------|------|
| 23 | 859  | 387  |
| 29 | 1214 | 859  |
| 19 | 1654 | 156  |
| 26 | 1447 | 602  |
| 30 | 1214 | 968  |
| 21 | 1752 | 260  |
| 33 | 1214 | 1335 |
| 27 | 1214 | 679  |
| 31 | 1553 | 1084 |
| 24 | 1752 | 459  |
| 42 | 1654 | 1959 |
| 31 | 1824 | 1084 |
| 19 | 1335 | 156  |
| 23 | 1654 | 387  |
| 23 | 1654 | 387  |
| 26 | 1084 | 602  |
| 32 | 1654 | 1214 |
| 19 | 1447 | 156  |
| 23 | 968  | 387  |
| 27 | 1553 | 679  |
| 29 | 1335 | 859  |
| 18 | 1214 | 114  |
| 17 | 968  | 77   |
| 27 | 1877 | 679  |
| 30 | 1553 | 968  |
| 30 | 1084 | 968  |
| 25 | 859  | 529  |
| 24 | 859  | 459  |
| 23 | 762  | 387  |
| 21 | 1447 | 260  |
| 23 | 1752 | 387  |
| 21 | 1917 | 260  |
| 30 | 1959 | 968  |
| 18 | 1084 | 114  |
| 30 | 1084 | 968  |
| 21 | 1335 | 260  |
| 28 | 762  | 762  |
| 31 | 1917 | 1084 |
| 23 | 859  | 387  |
| 10 | 968  | 4    |
| 26 | 1959 | 602  |
| 20 | 1214 | 202  |
| 17 | 1447 | 77   |
| 23 | 1985 | 387  |
| 41 | 1335 | 1942 |
| 16 | 1447 | 54   |
| 25 | 1553 | 529  |
| 19 | 679  | 156  |
| 23 | 1084 | 387  |
| 28 | 1447 | 762  |
| 46 | 1447 | 1990 |
| 27 | 1084 | 679  |
| 30 | 762  | 968  |
| 38 | 1214 | 1824 |
| 19 | 1447 | 156  |
| 25 | 1335 | 529  |
| 28 | 1917 | 762  |
| 23 | 1654 | 387  |
| 19 | 968  | 156  |

|    |      |      |
|----|------|------|
| 26 | 968  | 602  |
| 37 | 1553 | 1752 |
| 29 | 1447 | 859  |
| 19 | 1824 | 156  |
| 13 | 1214 | 17   |
| 23 | 859  | 387  |
| 18 | 1214 | 114  |
| 21 | 1752 | 260  |
| 19 | 1877 | 156  |
| 30 | 859  | 968  |
| 42 | 1214 | 1959 |
| 21 | 1824 | 260  |
| 19 | 1084 | 156  |
| 31 | 1335 | 1084 |
| 21 | 1654 | 260  |
| 27 | 1824 | 679  |
| 26 | 859  | 602  |
| 31 | 1917 | 1084 |
| 18 | 1917 | 114  |
| 28 | 968  | 762  |
| 15 | 1084 | 38   |
| 24 | 1084 | 459  |
| 22 | 1978 | 323  |
| 27 | 1084 | 679  |
| 17 | 1917 | 77   |
| 21 | 1553 | 260  |
| 15 | 1084 | 38   |
| 11 | 1214 | 7    |
| 28 | 1824 | 762  |
| 32 | 968  | 1214 |
| 34 | 1654 | 1447 |
| 24 | 1877 | 459  |
| 30 | 1824 | 968  |
| 23 | 1084 | 387  |
| 19 | 1877 | 156  |
| 20 | 1942 | 202  |
| 27 | 1553 | 679  |
| 24 | 1654 | 459  |
| 22 | 859  | 323  |
| 21 | 859  | 260  |
| 17 | 1447 | 77   |
| 27 | 1752 | 679  |
| 37 | 1335 | 1752 |
| 21 | 762  | 260  |
| 30 | 323  | 968  |
| 20 | 1752 | 202  |
| 41 | 1824 | 1942 |
| 23 | 1877 | 387  |
| 30 | 1214 | 968  |
| 21 | 1654 | 260  |
| 21 | 1335 | 260  |
| 32 | 762  | 1214 |
| 30 | 602  | 968  |
| 24 | 1335 | 459  |
| 24 | 1993 | 459  |
| 29 | 1335 | 859  |
| 32 | 859  | 1214 |
| 31 | 1752 | 1084 |
| 36 | 1214 | 1654 |

|    |      |      |
|----|------|------|
| 17 | 1084 | 77   |
| 15 | 1654 | 38   |
| 24 | 1447 | 459  |
| 21 | 1214 | 260  |
| 17 | 1752 | 77   |
| 32 | 1752 | 1214 |
| 20 | 1447 | 202  |
| 26 | 1970 | 602  |
| 27 | 1553 | 679  |
| 23 | 1084 | 387  |
| 22 | 1335 | 323  |
| 20 | 1877 | 202  |
| 28 | 762  | 762  |
| 18 | 1553 | 114  |
| 27 | 602  | 679  |
| 29 | 679  | 859  |
| 19 | 1985 | 156  |
| 31 | 968  | 1084 |
| 28 | 859  | 762  |
| 24 | 1654 | 459  |
| 28 | 859  | 762  |
| 39 | 1084 | 1877 |
| 38 | 1752 | 1824 |
| 21 | 1553 | 260  |
| 28 | 1084 | 762  |
| 31 | 1084 | 1084 |
| 27 | 1654 | 679  |
| 37 | 1447 | 1752 |
| 18 | 1335 | 114  |
| 11 | 1877 | 7    |
| 22 | 1824 | 323  |
| 27 | 1553 | 679  |
| 30 | 1214 | 968  |
| 23 | 1447 | 387  |
| 28 | 1214 | 762  |
| 21 | 1214 | 260  |
| 25 | 1335 | 529  |
| 36 | 1877 | 1654 |
| 21 | 1447 | 260  |
| 19 | 1553 | 156  |
| 29 | 1654 | 859  |
| 22 | 1942 | 323  |
| 15 | 1084 | 38   |
| 23 | 1214 | 387  |
| 21 | 1959 | 260  |
| 24 | 1877 | 459  |
| 26 | 1824 | 602  |
| 21 | 602  | 260  |
| 24 | 1654 | 459  |
| 23 | 1654 | 387  |
| 26 | 859  | 602  |
| 27 | 1824 | 679  |
| 19 | 968  | 156  |
| 34 | 968  | 1447 |
| 38 | 1654 | 1824 |
| 21 | 1214 | 260  |
| 30 | 1335 | 968  |
| 34 | 1335 | 1447 |
| 33 | 1214 | 1335 |

|    |      |      |
|----|------|------|
| 17 | 1752 | 77   |
| 19 | 1553 | 156  |
| 35 | 1084 | 1553 |
| 31 | 1752 | 1084 |
| 22 | 1335 | 323  |
| 35 | 762  | 1553 |
| 25 | 1654 | 529  |
| 25 | 1553 | 529  |
| 27 | 762  | 679  |
| 24 | 1335 | 459  |
| 27 | 1752 | 679  |
| 35 | 1447 | 1553 |
| 28 | 1553 | 762  |
| 33 | 1447 | 1335 |
| 24 | 1917 | 459  |
| 18 | 1214 | 114  |
| 23 | 968  | 387  |
| 25 | 1654 | 529  |
| 27 | 1877 | 679  |
| 30 | 1752 | 968  |
| 25 | 1214 | 529  |
| 29 | 1959 | 859  |
| 21 | 1824 | 260  |
| 44 | 1942 | 1978 |
| 25 | 1553 | 529  |
| 34 | 859  | 1447 |
| 21 | 1752 | 260  |
| 29 | 1553 | 859  |
| 23 | 529  | 387  |
| 33 | 1752 | 1335 |
| 25 | 1084 | 529  |
| 23 | 859  | 387  |
| 24 | 859  | 459  |
| 37 | 1214 | 1752 |
| 27 | 1214 | 679  |
| 30 | 1752 | 968  |
| 21 | 1917 | 260  |
| 20 | 1752 | 202  |
| 50 | 1214 | 1997 |
| 31 | 762  | 1084 |
| 21 | 1214 | 260  |
| 17 | 1553 | 77   |
| 22 | 762  | 323  |
| 22 | 1447 | 323  |
| 23 | 968  | 387  |
| 35 | 1942 | 1553 |
| 44 | 1553 | 1978 |
| 33 | 1214 | 1335 |
| 21 | 679  | 260  |
| 20 | 859  | 202  |
| 29 | 1335 | 859  |
| 30 | 1654 | 968  |
| 27 | 1824 | 679  |
| 18 | 762  | 114  |
| 20 | 1824 | 202  |
| 22 | 1084 | 323  |
| 25 | 1335 | 529  |
| 29 | 1214 | 859  |
| 35 | 1917 | 1553 |

|    |      |      |
|----|------|------|
| 33 | 1654 | 1335 |
| 26 | 1752 | 602  |
| 22 | 1084 | 323  |
| 23 | 1084 | 387  |
| 27 | 1654 | 679  |
| 25 | 1824 | 529  |
| 29 | 1084 | 859  |
| 24 | 1214 | 459  |
| 16 | 1335 | 54   |
| 26 | 1214 | 602  |
| 13 | 1335 | 17   |
| 37 | 859  | 1752 |
| 27 | 1824 | 679  |
| 26 | 1654 | 602  |
| 30 | 602  | 968  |
| 23 | 1654 | 387  |
| 25 | 1877 | 529  |
| 33 | 1553 | 1335 |
| 12 | 1335 | 11   |
| 30 | 859  | 968  |
| 25 | 1824 | 529  |
| 29 | 1084 | 859  |
| 26 | 1214 | 602  |
| 24 | 1335 | 459  |
| 22 | 1752 | 323  |
| 27 | 1214 | 679  |
| 15 | 1084 | 38   |
| 24 | 1214 | 459  |
| 28 | 679  | 762  |
| 31 | 1752 | 1084 |
| 22 | 1752 | 323  |
| 31 | 1084 | 1084 |
| 16 | 762  | 54   |
| 26 | 1447 | 602  |
| 18 | 1824 | 114  |
| 17 | 1959 | 77   |
| 21 | 1447 | 260  |
| 22 | 1752 | 323  |
| 25 | 1335 | 529  |
| 19 | 1214 | 156  |
| 24 | 1447 | 459  |
| 37 | 1084 | 1752 |
| 17 | 1942 | 77   |
| 28 | 529  | 762  |
| 24 | 762  | 459  |
| 30 | 1654 | 968  |
| 30 | 968  | 968  |
| 21 | 1084 | 260  |
| 22 | 1084 | 323  |
| 26 | 1447 | 602  |
| 19 | 968  | 156  |
| 26 | 1335 | 602  |
| 23 | 859  | 387  |
| 37 | 1654 | 1752 |
| 27 | 1654 | 679  |
| 19 | 1824 | 156  |
| 21 | 1970 | 260  |
| 22 | 1335 | 323  |
| 28 | 968  | 762  |

|    |      |      |
|----|------|------|
| 18 | 1214 | 114  |
| 20 | 859  | 202  |
| 25 | 1752 | 529  |
| 28 | 1214 | 762  |
| 17 | 1335 | 77   |
| 37 | 1553 | 1752 |
| 28 | 859  | 762  |
| 28 | 1335 | 762  |
| 41 | 762  | 1942 |
| 31 | 1654 | 1084 |
| 23 | 1553 | 387  |
| 30 | 1447 | 968  |
| 29 | 859  | 859  |
| 43 | 1214 | 1970 |
| 32 | 1447 | 1214 |
| 25 | 968  | 529  |
| 24 | 762  | 459  |
| 23 | 679  | 387  |
| 16 | 968  | 54   |
| 21 | 1553 | 260  |
| 47 | 859  | 1993 |
| 21 | 1553 | 260  |
| 27 | 1654 | 679  |
| 30 | 1654 | 968  |
| 15 | 1877 | 38   |
| 14 | 1447 | 24   |
| 28 | 1335 | 762  |
| 23 | 1553 | 387  |
| 32 | 1084 | 1214 |
| 26 | 859  | 602  |
| 21 | 1824 | 260  |
| 22 | 1447 | 323  |
| 29 | 1824 | 859  |
| 13 | 1824 | 17   |
| 31 | 1214 | 1084 |
| 20 | 1214 | 202  |
| 45 | 1335 | 1985 |
| 16 | 968  | 54   |
| 33 | 1917 | 1335 |
| 32 | 1447 | 1214 |
| 22 | 1447 | 323  |
| 30 | 1824 | 968  |
| 24 | 1335 | 459  |
| 29 | 762  | 859  |
| 24 | 1824 | 459  |
| 26 | 1970 | 602  |
| 22 | 1942 | 323  |
| 23 | 1752 | 387  |
| 17 | 1447 | 77   |
| 32 | 1447 | 1214 |
| 23 | 1553 | 387  |
| 23 | 1447 | 387  |
| 32 | 1824 | 1214 |
| 27 | 1752 | 679  |
| 34 | 1654 | 1447 |
| 24 | 1654 | 459  |
| 27 | 762  | 679  |
| 28 | 1335 | 762  |
| 20 | 1335 | 202  |



|    |      |      |
|----|------|------|
| 21 | 529  | 260  |
| 23 | 1877 | 387  |
| 19 | 968  | 156  |
| 26 | 1752 | 602  |
| 40 | 459  | 1917 |
| 31 | 1752 | 1084 |
| 37 | 602  | 1752 |

|    |      |      |
|----|------|------|
| 27 | 1447 | 679  |
| 31 | 1654 | 1084 |
| 16 | 602  | 54   |
| 24 | 1447 | 459  |
| 18 | 1654 | 114  |
| 24 | 762  | 459  |
| 19 | 1447 | 156  |
| 17 | 1824 | 77   |
| 22 | 1942 | 323  |
| 37 | 859  | 1752 |
| 12 | 1335 | 11   |
| 28 | 1214 | 762  |
| 20 | 1084 | 202  |
| 27 | 859  | 679  |
| 32 | 1214 | 1214 |
| 18 | 859  | 114  |

|    |      |      |
|----|------|------|
| 27 | 1824 | 679  |
| 28 | 1214 | 762  |
| 21 | 1084 | 260  |
| 25 | 1214 | 529  |
| 22 | 1084 | 323  |
| 29 | 1335 | 859  |
| 16 | 1214 | 54   |
| 21 | 1654 | 260  |
| 27 | 1877 | 679  |
| 20 | 1917 | 202  |
| 17 | 859  | 77   |
| 25 | 1447 | 529  |
| 17 | 859  | 77   |
| 34 | 1877 | 1447 |
| 20 | 1447 | 202  |
| 32 | 1877 | 1214 |
| 33 | 1084 | 1335 |
| 22 | 1752 | 323  |
| 25 | 1214 | 529  |
| 23 | 1654 | 387  |
| 26 | 1335 | 602  |
| 24 | 1214 | 459  |
| 29 | 1335 | 859  |
| 20 | 1752 | 202  |
| 18 | 1553 | 114  |
| 33 | 1084 | 1335 |
| 32 | 1654 | 1214 |
| 25 | 1447 | 529  |
| 18 | 1654 | 114  |
| 24 | 1752 | 459  |
| 25 | 1970 | 529  |
| 29 | 1978 | 859  |
| 20 | 1654 | 202  |
| 22 | 968  | 323  |
| 24 | 1654 | 459  |
| 24 | 1214 | 459  |
| 30 | 1214 | 968  |
| 20 | 762  | 202  |
| 18 | 1654 | 114  |
| 23 | 762  | 387  |
| 17 | 1942 | 77   |
| 28 | 1917 | 762  |
| 31 | 1824 | 1084 |
| 20 | 968  | 202  |
| 23 | 679  | 387  |
| 23 | 1084 | 387  |
| 25 | 1447 | 529  |
| 25 | 1752 | 529  |
| 18 | 762  | 114  |
| 20 | 859  | 202  |
| 25 | 1214 | 529  |
| 22 | 859  | 323  |
| 26 | 1654 | 602  |
| 23 | 1553 | 387  |
| 15 | 1084 | 38   |
| 33 | 1917 | 1335 |
| 33 | 1553 | 1335 |
| 18 | 1214 | 114  |
| 29 | 762  | 859  |

|    |      |      |
|----|------|------|
| 21 | 1214 | 260  |
| 24 | 1752 | 459  |
| 23 | 1824 | 387  |
| 26 | 1214 | 602  |
| 23 | 1824 | 387  |
| 25 | 1447 | 529  |
| 31 | 1553 | 1084 |
| 28 | 1752 | 762  |
| 20 | 968  | 202  |
| 30 | 1447 | 968  |
| 24 | 968  | 459  |
| 35 | 1654 | 1553 |
| 33 | 968  | 1335 |
| 30 | 1084 | 968  |
| 23 | 859  | 387  |
| 29 | 1214 | 859  |
| 19 | 1654 | 156  |
| 26 | 1447 | 602  |
| 30 | 1214 | 968  |
| 21 | 1752 | 260  |
| 33 | 1214 | 1335 |
| 27 | 1214 | 679  |
| 31 | 1553 | 1084 |
| 24 | 1752 | 459  |
| 42 | 1654 | 1959 |
| 31 | 1824 | 1084 |
| 19 | 1335 | 156  |
| 23 | 1654 | 387  |
| 23 | 1654 | 387  |
| 26 | 1084 | 602  |
| 32 | 1654 | 1214 |
| 19 | 1447 | 156  |
| 23 | 968  | 387  |
| 27 | 1553 | 679  |
| 29 | 1335 | 859  |
| 18 | 1214 | 114  |
| 17 | 968  | 77   |
| 27 | 1877 | 679  |
| 30 | 1553 | 968  |
| 30 | 1084 | 968  |
| 25 | 859  | 529  |
| 24 | 859  | 459  |
| 23 | 762  | 387  |
| 21 | 1447 | 260  |
| 23 | 1752 | 387  |
| 21 | 1917 | 260  |
| 30 | 1959 | 968  |
| 18 | 1084 | 114  |
| 30 | 1084 | 968  |
| 21 | 1335 | 260  |
| 28 | 762  | 762  |
| 31 | 1917 | 1084 |
| 23 | 859  | 387  |
| 10 | 968  | 4    |
| 26 | 1959 | 602  |
| 20 | 1214 | 202  |
| 17 | 1447 | 77   |
| 23 | 1985 | 387  |
| 41 | 1335 | 1942 |

|    |      |      |
|----|------|------|
| 16 | 1447 | 54   |
| 25 | 1553 | 529  |
| 19 | 679  | 156  |
| 23 | 1084 | 387  |
| 28 | 1447 | 762  |
| 46 | 1447 | 1990 |
| 27 | 1084 | 679  |
| 30 | 762  | 968  |
| 38 | 1214 | 1824 |
| 19 | 1447 | 156  |
| 25 | 1335 | 529  |
| 28 | 1917 | 762  |
| 23 | 1654 | 387  |
| 19 | 968  | 156  |
| 26 | 968  | 602  |
| 37 | 1553 | 1752 |
| 29 | 1447 | 859  |
| 19 | 1824 | 156  |
| 13 | 1214 | 17   |
| 23 | 859  | 387  |
| 18 | 1214 | 114  |
| 21 | 1752 | 260  |
| 19 | 1877 | 156  |
| 30 | 859  | 968  |
| 42 | 1214 | 1959 |
| 21 | 1824 | 260  |
| 19 | 1084 | 156  |
| 31 | 1335 | 1084 |
| 21 | 1654 | 260  |
| 27 | 1824 | 679  |
| 26 | 859  | 602  |
| 31 | 1917 | 1084 |
| 18 | 1917 | 114  |
| 28 | 968  | 762  |
| 15 | 1084 | 38   |
| 24 | 1084 | 459  |
| 22 | 1978 | 323  |
| 27 | 1084 | 679  |
| 17 | 1917 | 77   |
| 21 | 1553 | 260  |
| 15 | 1084 | 38   |
| 11 | 1214 | 7    |
| 28 | 1824 | 762  |
| 32 | 968  | 1214 |
| 34 | 1654 | 1447 |
| 24 | 1877 | 459  |
| 30 | 1824 | 968  |
| 23 | 1084 | 387  |
| 19 | 1877 | 156  |
| 20 | 1942 | 202  |
| 27 | 1553 | 679  |
| 24 | 1654 | 459  |
| 22 | 859  | 323  |
| 21 | 859  | 260  |
| 17 | 1447 | 77   |
| 27 | 1752 | 679  |
| 37 | 1335 | 1752 |
| 21 | 762  | 260  |
| 30 | 323  | 968  |

|    |      |      |
|----|------|------|
| 20 | 1752 | 202  |
| 41 | 1824 | 1942 |
| 23 | 1877 | 387  |
| 30 | 1214 | 968  |
| 21 | 1654 | 260  |
| 21 | 1335 | 260  |
| 32 | 762  | 1214 |
| 30 | 602  | 968  |
| 24 | 1335 | 459  |
| 24 | 1993 | 459  |
| 29 | 1335 | 859  |
| 32 | 859  | 1214 |
| 31 | 1752 | 1084 |
| 36 | 1214 | 1654 |
| 17 | 1084 | 77   |
| 15 | 1654 | 38   |
| 24 | 1447 | 459  |
| 21 | 1214 | 260  |
| 17 | 1752 | 77   |
| 32 | 1752 | 1214 |
| 20 | 1447 | 202  |
| 26 | 1970 | 602  |
| 27 | 1553 | 679  |
| 23 | 1084 | 387  |
| 22 | 1335 | 323  |
| 20 | 1877 | 202  |
| 28 | 762  | 762  |
| 18 | 1553 | 114  |
| 27 | 602  | 679  |
| 29 | 679  | 859  |
| 19 | 1985 | 156  |
| 31 | 968  | 1084 |
| 28 | 859  | 762  |
| 24 | 1654 | 459  |
| 28 | 859  | 762  |
| 39 | 1084 | 1877 |
| 38 | 1752 | 1824 |
| 21 | 1553 | 260  |
| 28 | 1084 | 762  |
| 31 | 1084 | 1084 |
| 27 | 1654 | 679  |
| 37 | 1447 | 1752 |
| 18 | 1335 | 114  |
| 11 | 1877 | 7    |
| 22 | 1824 | 323  |
| 27 | 1553 | 679  |
| 30 | 1214 | 968  |
| 23 | 1447 | 387  |
| 28 | 1214 | 762  |
| 21 | 1214 | 260  |
| 25 | 1335 | 529  |
| 36 | 1877 | 1654 |
| 21 | 1447 | 260  |
| 19 | 1553 | 156  |
| 29 | 1654 | 859  |
| 22 | 1942 | 323  |
| 15 | 1084 | 38   |
| 23 | 1214 | 387  |
| 21 | 1959 | 260  |

|    |      |      |
|----|------|------|
| 24 | 1877 | 459  |
| 26 | 1824 | 602  |
| 21 | 602  | 260  |
| 24 | 1654 | 459  |
| 23 | 1654 | 387  |
| 26 | 859  | 602  |
| 27 | 1824 | 679  |
| 19 | 968  | 156  |
| 34 | 968  | 1447 |
| 38 | 1654 | 1824 |
| 21 | 1214 | 260  |
| 30 | 1335 | 968  |
| 34 | 1335 | 1447 |
| 33 | 1214 | 1335 |
| 17 | 1752 | 77   |
| 19 | 1553 | 156  |
| 35 | 1084 | 1553 |
| 31 | 1752 | 1084 |
| 22 | 1335 | 323  |
| 35 | 762  | 1553 |
| 25 | 1654 | 529  |
| 25 | 1553 | 529  |
| 27 | 762  | 679  |
| 24 | 1335 | 459  |
| 27 | 1752 | 679  |
| 35 | 1447 | 1553 |
| 28 | 1553 | 762  |
| 33 | 1447 | 1335 |
| 24 | 1917 | 459  |
| 18 | 1214 | 114  |
| 23 | 968  | 387  |
| 25 | 1654 | 529  |
| 27 | 1877 | 679  |
| 30 | 1752 | 968  |
| 25 | 1214 | 529  |
| 29 | 1959 | 859  |
| 21 | 1824 | 260  |
| 44 | 1942 | 1978 |
| 25 | 1553 | 529  |
| 34 | 859  | 1447 |
| 21 | 1752 | 260  |
| 29 | 1553 | 859  |
| 23 | 529  | 387  |
| 33 | 1752 | 1335 |
| 25 | 1084 | 529  |
| 23 | 859  | 387  |
| 24 | 859  | 459  |
| 37 | 1214 | 1752 |
| 27 | 1214 | 679  |
| 30 | 1752 | 968  |
| 21 | 1917 | 260  |
| 20 | 1752 | 202  |
| 50 | 1214 | 1997 |
| 31 | 762  | 1084 |
| 21 | 1214 | 260  |
| 17 | 1553 | 77   |
| 22 | 762  | 323  |
| 22 | 1447 | 323  |
| 23 | 968  | 387  |

|    |      |      |
|----|------|------|
| 35 | 1942 | 1553 |
| 44 | 1553 | 1978 |
| 33 | 1214 | 1335 |
| 21 | 679  | 260  |
| 20 | 859  | 202  |
| 29 | 1335 | 859  |
| 30 | 1654 | 968  |
| 27 | 1824 | 679  |
| 18 | 762  | 114  |
| 20 | 1824 | 202  |
| 22 | 1084 | 323  |
| 25 | 1335 | 529  |
| 29 | 1214 | 859  |
| 35 | 1917 | 1553 |
| 33 | 1654 | 1335 |
| 26 | 1752 | 602  |
| 22 | 1084 | 323  |
| 23 | 1084 | 387  |
| 27 | 1654 | 679  |
| 25 | 1824 | 529  |
| 29 | 1084 | 859  |
| 24 | 1214 | 459  |
| 16 | 1335 | 54   |
| 26 | 1214 | 602  |
| 13 | 1335 | 17   |
| 37 | 859  | 1752 |
| 27 | 1824 | 679  |
| 26 | 1654 | 602  |
| 30 | 602  | 968  |
| 23 | 1654 | 387  |
| 25 | 1877 | 529  |
| 33 | 1553 | 1335 |
| 12 | 1335 | 11   |
| 30 | 859  | 968  |
| 25 | 1824 | 529  |
| 29 | 1084 | 859  |
| 26 | 1214 | 602  |
| 24 | 1335 | 459  |
| 22 | 1752 | 323  |
| 27 | 1214 | 679  |
| 15 | 1084 | 38   |
| 24 | 1214 | 459  |
| 28 | 679  | 762  |
| 31 | 1752 | 1084 |
| 22 | 1752 | 323  |
| 31 | 1084 | 1084 |
| 16 | 762  | 54   |
| 26 | 1447 | 602  |
| 18 | 1824 | 114  |
| 17 | 1959 | 77   |
| 21 | 1447 | 260  |
| 22 | 1752 | 323  |
| 25 | 1335 | 529  |
| 19 | 1214 | 156  |
| 24 | 1447 | 459  |
| 37 | 1084 | 1752 |
| 17 | 1942 | 77   |
| 28 | 529  | 762  |
| 24 | 762  | 459  |



|    |      |      |
|----|------|------|
| 30 | 1654 | 968  |
| 30 | 968  | 968  |
| 21 | 1084 | 260  |
| 22 | 1084 | 323  |
| 26 | 1447 | 602  |
| 19 | 968  | 156  |
| 26 | 1335 | 602  |
| 23 | 859  | 387  |
| 37 | 1654 | 1752 |
| 27 | 1654 | 679  |
| 19 | 1824 | 156  |
| 21 | 1970 | 260  |
| 22 | 1335 | 323  |
| 28 | 968  | 762  |
| 18 | 1214 | 114  |
| 20 | 859  | 202  |
| 25 | 1752 | 529  |
| 28 | 1214 | 762  |
| 17 | 1335 | 77   |
| 37 | 1553 | 1752 |
| 28 | 859  | 762  |
| 28 | 1335 | 762  |
| 41 | 762  | 1942 |
| 31 | 1654 | 1084 |
| 23 | 1553 | 387  |
| 30 | 1447 | 968  |
| 29 | 859  | 859  |
| 43 | 1214 | 1970 |
| 32 | 1447 | 1214 |
| 25 | 968  | 529  |
| 24 | 762  | 459  |
| 23 | 679  | 387  |
| 16 | 968  | 54   |
| 21 | 1553 | 260  |
| 47 | 859  | 1993 |
| 21 | 1553 | 260  |
| 27 | 1654 | 679  |
| 30 | 1654 | 968  |
| 15 | 1877 | 38   |
| 14 | 1447 | 24   |
| 28 | 1335 | 762  |
| 23 | 1553 | 387  |
| 32 | 1084 | 1214 |
| 26 | 859  | 602  |
| 21 | 1824 | 260  |
| 22 | 1447 | 323  |
| 29 | 1824 | 859  |
| 13 | 1824 | 17   |
| 31 | 1214 | 1084 |
| 20 | 1214 | 202  |
| 45 | 1335 | 1985 |
| 16 | 968  | 54   |
| 33 | 1917 | 1335 |
| 32 | 1447 | 1214 |
| 22 | 1447 | 323  |
| 30 | 1824 | 968  |
| 24 | 1335 | 459  |
| 29 | 762  | 859  |
| 24 | 1824 | 459  |

|    |      |      |
|----|------|------|
| 26 | 1970 | 602  |
| 22 | 1942 | 323  |
| 23 | 1752 | 387  |
| 17 | 1447 | 77   |
| 32 | 1447 | 1214 |
| 23 | 1553 | 387  |
| 23 | 1447 | 387  |
| 32 | 1824 | 1214 |
| 27 | 1752 | 679  |
| 34 | 1654 | 1447 |
| 24 | 1654 | 459  |
| 27 | 762  | 679  |
| 28 | 1335 | 762  |
| 20 | 1335 | 202  |
| 21 | 529  | 260  |
| 23 | 1877 | 387  |
| 19 | 968  | 156  |
| 26 | 1752 | 602  |
| 40 | 459  | 1917 |
| 31 | 1752 | 1084 |
| 37 | 602  | 1752 |



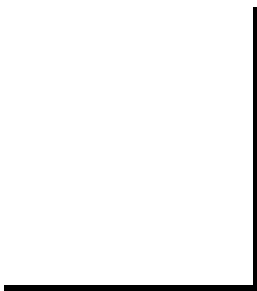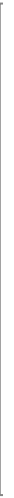







72 73 74 75 76 77 78 79 80 81 82 83 84 85 86 87  
B\_31 C\_4 C\_45 D\_11 D\_35 D\_5 D\_6 E\_19 E\_21 E\_22 E\_23 E\_3 E\_46 E\_48 E\_7 E\_8





0.33  
0.39 0.32  
-0.22 -0.29 -0.17  
0.36 0.27 0.35 -0.25  
0.30 -0.08 0.15 -0.12 -0.04  
0.37 -0.06 -0.09 -0.17 0.03 0.46  
-0.04 0.16 0.21 -0.09 0.15 0.18 -0.31  
0.14 0.07 0.10 -0.21 0.12 0.23 -0.10 0.65  
-0.31 -0.14 -0.33 0.17 -0.34 -0.12 -0.36 0.19 0.42  
0.09 0.07 0.01 -0.11 0.18 0.12 -0.02 0.46 0.67 0.22  
0.10 -0.32 0.05 0.13 0.12 -0.14 -0.02 -0.31 -0.09 0.07 -0.02  
0.27 0.20 0.36 -0.20 0.23 0.15 -0.07 0.35 0.25 -0.11 0.09 -0.08  
0.22 0.33 0.23 -0.23 0.21 0.05 -0.04 0.30 0.11 -0.11 0.01 -0.23 0.85  
0.07 -0.29 0.09 0.19 -0.06 0.07 -0.23 0.26 0.53 0.40 0.37 0.46 0.07 -0.16  
0.16 -0.11 0.23 -0.10 0.25 0.14 -0.16 0.44 0.64 0.20 0.71 0.31 0.17 -0.04 0.62  
0.06 0.21 0.03 -0.02 0.07 -0.05 -0.30 0.24 0.37 0.37 0.48 0.21 0.04 0.01 0.41 0.53  
0.49 0.23 0.35 -0.31 0.27 0.53 0.19 0.40 0.44 -0.20 0.27 -0.12 0.35 0.21 0.15 0.44  
0.06 -0.12 0.04 -0.01 0.05 0.09 -0.27 0.31 0.60 0.42 0.56 0.26 -0.01 -0.17 0.70 0.65  
0.28 0.33 0.19 -0.29 0.47 0.21 0.12 0.21 0.14 -0.14 0.08 -0.34 0.27 0.33 -0.28 -0.02  
0.19 0.00 -0.21 -0.06 0.01 0.20 0.34 -0.16 -0.17 -0.20 0.06 0.09 -0.11 -0.09 -0.09 0.04  
-0.24 -0.34 -0.24 0.16 -0.05 -0.34 0.04 -0.18 -0.12 0.02 0.04 0.33 -0.30 -0.35 0.10 0.25  
0.05 0.08 -0.16 -0.24 0.11 0.30 0.08 0.38 0.46 0.27 0.21 -0.34 0.15 0.18 -0.03 0.06  
0.00 0.22 -0.10 0.09 -0.01 0.09 -0.04 0.22 0.17 0.01 0.17 -0.27 0.07 0.02 -0.06 0.00





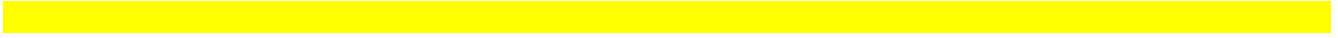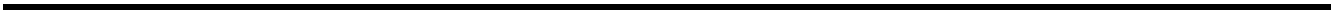



















































































































































































The Wilcoxon Rank-Sum Test (Two Independent Samples)

100 trials

INPUT DATA & RANKS

|                                          | Ptrue | Ppseudo | RANKS |         |     |
|------------------------------------------|-------|---------|-------|---------|-----|
| Observed                                 | Ptrue | Ppseudo | Ptrue | Ppseudo |     |
| Mean: 26                                 | 36    | 17      | 38    | 10      | 163 |
| Media 25                                 | 36    | 27      | 36    | 64      | 142 |
| Stand 6                                  | 4     | 33      | 38    | 104     | 163 |
| The Test Procedure                       |       | 24      | 38    | 45      | 163 |
| Hyp 0                                    |       | 21      | 36    | 21      | 142 |
| Nb. 31                                   |       | 12      | 36    | 1       | 142 |
| Ave 6                                    |       | 23      | 36    | 34      | 142 |
| Ran 20100                                |       | 21      | 38    | 21      | 163 |
| Ran 101                                  |       | 33      | 36    | 104     | 142 |
| Tes 5966                                 |       | 25      | 34    | 52      | 119 |
| Nom 0                                    |       | 20      | 30    | 16      | 87  |
|                                          |       | 25      | 40    | 52      | 179 |
| Two-Tailed Test (Normal Approximation)   |       | 14      | 28    | 3       | 72  |
| Cri -1.95996398454005 and 1.95996398454  |       | 35      | 36    | 132     | 142 |
| Dec Reject H0 if  Z-Stat  > 1.959963984  |       | 21      | 40    | 21      | 179 |
| Z S -10                                  |       | 27      | 38    | 64      | 163 |
| Z S 10                                   |       | 24      | 32    | 45      | 97  |
| Z S -10                                  |       | 36      | 36    | 142     | 142 |
| P-V 0                                    |       | 25      | 38    | 52      | 163 |
| Fin The Null Hypothesis Must be Rejected |       | 13      | 38    | 2       | 163 |
|                                          |       | 34      | 34    | 119     | 119 |
|                                          |       | 23      | 42    | 34      | 191 |
|                                          |       | 29      | 38    | 79      | 163 |
|                                          |       | 26      | 44    | 58      | 198 |
|                                          |       | 21      | 34    | 21      | 119 |
|                                          |       | 23      | 36    | 34      | 142 |
|                                          |       | 19      | 28    | 13      | 72  |
|                                          |       | 25      | 36    | 52      | 142 |
|                                          |       | 35      | 42    | 132     | 191 |
|                                          |       | 23      | 36    | 34      | 142 |
|                                          |       | 25      | 36    | 52      | 142 |
|                                          |       | 29      | 36    | 79      | 142 |
|                                          |       | 17      | 42    | 10      | 191 |
|                                          |       | 23      | 28    | 34      | 72  |
|                                          |       | 23      | 38    | 34      | 163 |
|                                          |       | 31      | 38    | 92      | 163 |
|                                          |       | 24      | 34    | 45      | 119 |
|                                          |       | 29      | 46    | 79      | 200 |
|                                          |       | 40      | 42    | 179     | 191 |
|                                          |       | 22      | 42    | 26      | 191 |
|                                          |       | 18      | 40    | 12      | 179 |
|                                          |       | 21      | 34    | 21      | 119 |
|                                          |       | 29      | 32    | 79      | 97  |
|                                          |       | 27      | 34    | 64      | 119 |
|                                          |       | 16      | 36    | 7       | 142 |
|                                          |       | 16      | 34    | 7       | 119 |
|                                          |       | 23      | 30    | 34      | 87  |
|                                          |       | 29      | 30    | 79      | 87  |
|                                          |       | 27      | 32    | 64      | 97  |

|    |    |     |     |
|----|----|-----|-----|
| 30 | 40 | 87  | 179 |
| 34 | 38 | 119 | 163 |
| 23 | 30 | 34  | 87  |
| 32 | 42 | 97  | 191 |
| 20 | 32 | 16  | 97  |
| 23 | 34 | 34  | 119 |
| 30 | 24 | 87  | 45  |
| 34 | 30 | 119 | 87  |
| 33 | 34 | 104 | 119 |
| 27 | 34 | 64  | 119 |
| 22 | 40 | 26  | 179 |
| 37 | 34 | 153 | 119 |
| 26 | 36 | 58  | 142 |
| 21 | 34 | 21  | 119 |
| 23 | 30 | 34  | 87  |
| 21 | 38 | 21  | 163 |
| 15 | 38 | 5   | 163 |
| 23 | 32 | 34  | 97  |
| 24 | 38 | 45  | 163 |
| 26 | 44 | 58  | 198 |
| 33 | 28 | 104 | 72  |
| 20 | 34 | 16  | 119 |
| 28 | 42 | 72  | 191 |
| 24 | 34 | 45  | 119 |
| 15 | 28 | 5   | 72  |
| 32 | 42 | 97  | 191 |
| 28 | 38 | 72  | 163 |
| 16 | 40 | 7   | 179 |
| 27 | 38 | 64  | 163 |
| 17 | 34 | 10  | 119 |
| 34 | 32 | 119 | 97  |
| 37 | 34 | 153 | 119 |
| 42 | 36 | 191 | 142 |
| 30 | 38 | 87  | 163 |
| 30 | 34 | 87  | 119 |
| 25 | 36 | 52  | 142 |
| 24 | 38 | 45  | 163 |
| 23 | 40 | 34  | 179 |
| 28 | 36 | 72  | 142 |
| 29 | 42 | 79  | 191 |
| 38 | 40 | 163 | 179 |
| 40 | 42 | 179 | 191 |
| 22 | 34 | 26  | 119 |
| 26 | 36 | 58  | 142 |
| 23 | 32 | 34  | 97  |
| 33 | 46 | 104 | 200 |
| 24 | 42 | 45  | 191 |
| 26 | 40 | 58  | 179 |
| 27 | 34 | 64  | 119 |
| 20 | 40 | 16  | 179 |
| 26 | 34 | 58  | 119 |



















dominant type by averages for miRNAs with 1E5 to 1E6 total

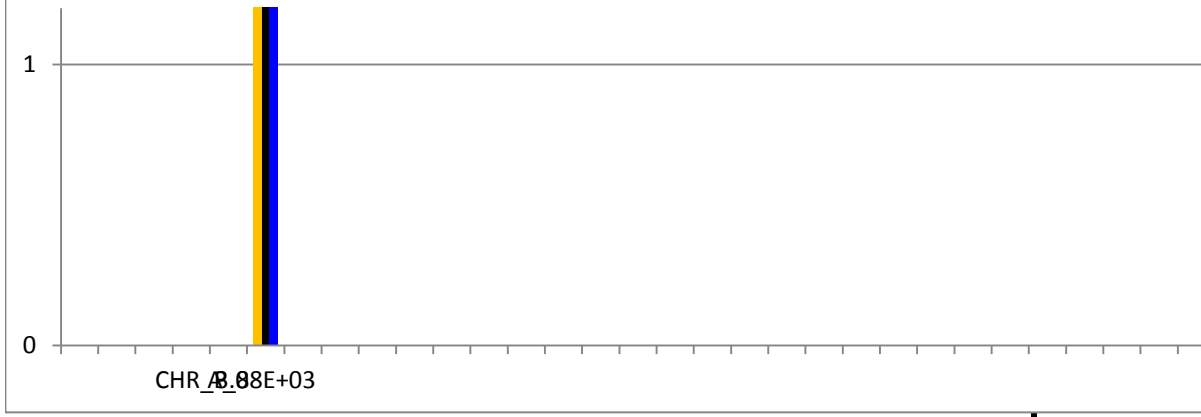



















dominant type by averages for miRNAs with 1E5 to 1E6 total

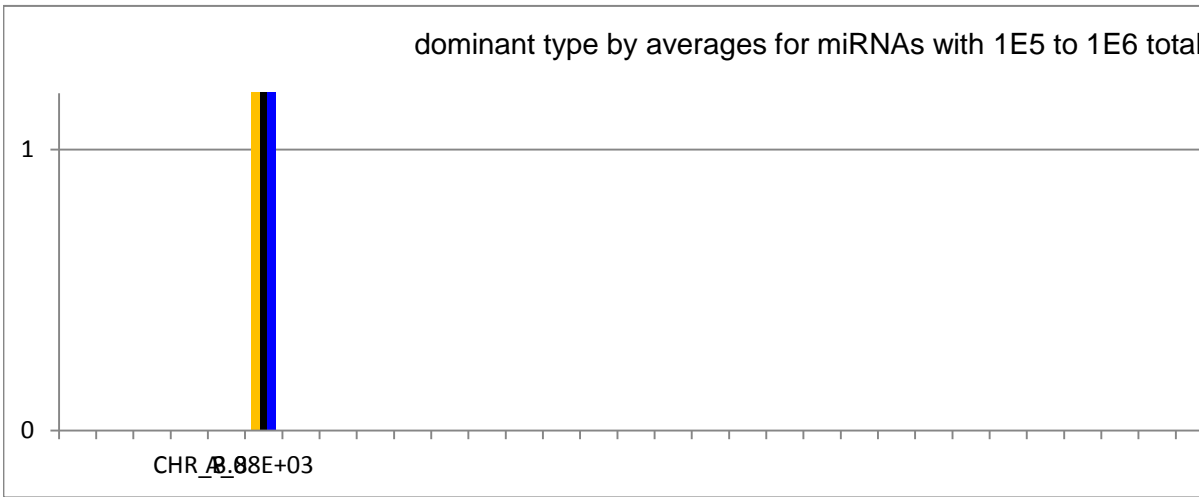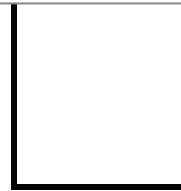





















dominant type by averages for miRNAs with 1E5 to 1E6 total

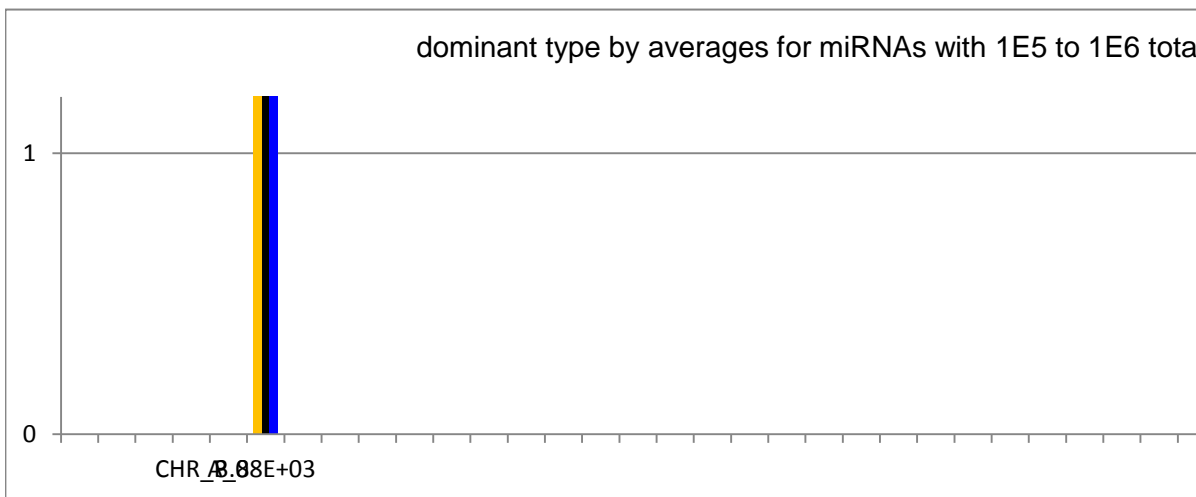







88 89 90 91 92 93 94 95  
E\_9 F\_40 F\_41 F\_42 F\_44 F\_9 G\_10 G\_9



|       |       |       |       |      |       |      |  |
|-------|-------|-------|-------|------|-------|------|--|
| 0.07  |       |       |       |      |       |      |  |
| 0.55  | 0.26  |       |       |      |       |      |  |
| -0.14 | 0.34  | -0.15 |       |      |       |      |  |
| -0.10 | 0.37  | 0.04  | -0.01 |      |       |      |  |
| -0.11 | -0.11 | 0.08  | -0.18 | 0.29 |       |      |  |
| -0.01 | 0.29  | 0.11  | 0.45  | 0.16 | -0.26 |      |  |
| 0.03  | 0.06  | -0.01 | 0.01  | 0.10 | -0.15 | 0.48 |  |







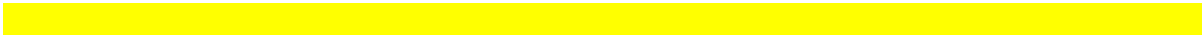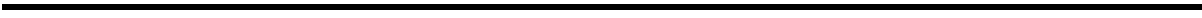



















































































































































































ave  
3.59E+06  
3.96E-02

| UC       | UC       | UC       | UC       | UC       |
|----------|----------|----------|----------|----------|
| A_11     | A_16     | A_2      | A_4      | A_7      |
| 1.65E+06 | 5.16E+05 | 5.58E+06 | 8.89E+06 | 1.42E+05 |

| UC       | CHR_P    | UC       | CHR_P    | CHR_NP   |
|----------|----------|----------|----------|----------|
| F_2      | A_8      | D_15     | A_9      | C_5      |
| 8.99E+02 | 3.08E+03 | 6.83E+04 | 8.23E+04 | 1.41E+05 |





















reads over 93 samples

■ 5.58E+06

■ 8.89E+06

■ 1.42E+05

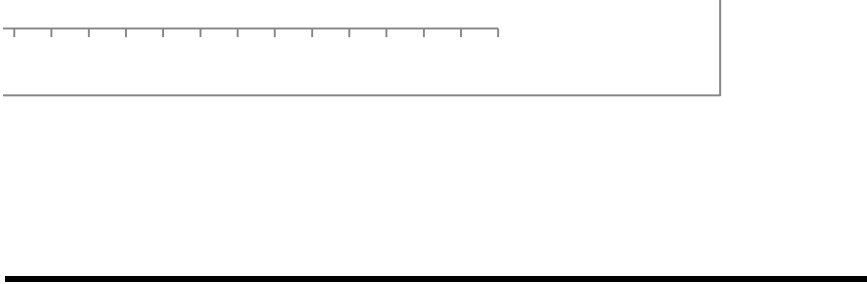



















reads over 93 samples

- 5.58E+06
- 8.89E+06
- 1.42E+05

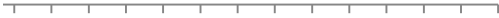



















reads over 93 samples

- 5.58E+06
- 8.89E+06
- 1.42E+05

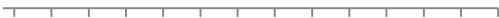









| consistent sign test | UC ave | NP ave | P ave | UCvPttest | NPvPttest |
|----------------------|--------|--------|-------|-----------|-----------|
| miR-92a-3p           | 0.00   | -0.08  | -0.38 | 0.11      | 0.17      |
| miR-191-5p           | 0.00   | -0.13  | -0.09 | 0.69      | 0.81      |
| miR-150-5p           | 0.00   | 0.12   | 0.21  | 0.54      | 0.78      |
| let-7a-5p            | 0.00   | -0.48  | -0.36 | 0.23      | 0.64      |
| miR-181a-5p          | 0.00   | 0.22   | -0.20 | 0.42      | 0.15      |
| miR-16-5p            | 0.00   | 0.12   | 0.51  | 0.13      | 0.26      |
| miR-26a-5p           | 0.00   | 0.45   | 0.39  | 0.16      | 0.83      |
| miR-451a             | 0.00   | 0.44   | 0.50  | 0.25      | 0.92      |

|                    |             |              |              |             |             |
|--------------------|-------------|--------------|--------------|-------------|-------------|
| miR-22-3p          | 0.00        | 0.06         | 0.28         | 0.29        | 0.36        |
| miR-25-3p          | 0.00        | -0.02        | 0.69         | 0.08        | 0.07        |
| let-7i-5p          | 0.00        | 0.41         | 0.67         | 0.05        | 0.55        |
| miR-30d-5p         | 0.00        | -0.13        | 0.13         | 0.73        | 0.51        |
| let-7g-5p          | 0.00        | 0.18         | 0.76         | 0.07        | 0.17        |
| let-7b-5p          | 0.00        | -0.28        | -0.13        | 0.77        | 0.74        |
| let-7f-5p          | 0.00        | 0.03         | 0.71         | 0.06        | 0.06        |
| miR-423-3p         | 0.00        | -0.17        | -0.29        | 0.24        | 0.54        |
| miR-26b-5p         | 0.00        | 0.17         | 0.45         | 0.10        | 0.29        |
| <b>miR-103a-3p</b> | <b>0.00</b> | <b>0.02</b>  | <b>0.53</b>  | <b>0.08</b> | <b>0.07</b> |
| miR-186-5p         | 0.00        | 0.21         | 0.27         | 0.29        | 0.83        |
| miR-28-3p          | 0.00        | 0.38         | 0.16         | 0.66        | 0.59        |
| miR-378a-3p        | 0.00        | 0.17         | 0.37         | 0.23        | 0.58        |
| miR-93-5p          | 0.00        | -0.15        | 0.24         | 0.47        | 0.20        |
| miR-148a-3p        | 0.00        | 0.27         | 0.49         | 0.09        | 0.46        |
| miR-223-3p         | 0.00        | 0.30         | 0.21         | 0.40        | 0.74        |
| miR-146b-5p        | 0.00        | 0.14         | 0.27         | 0.29        | 0.64        |
| miR-140-3p         | 0.00        | 0.14         | 0.36         | 0.17        | 0.37        |
| miR-320a           | 0.00        | 0.56         | 0.63         | 0.49        | 0.95        |
| miR-182-5p         | 0.00        | -0.08        | 0.25         | 0.36        | 0.20        |
| miR-151b           | 0.00        | 0.05         | 0.30         | 0.27        | 0.34        |
| miR-148b-3p        | 0.00        | 0.71         | 0.26         | 0.36        | 0.23        |
| miR-30c-5p         | 0.00        | 0.51         | 0.56         | 0.07        | 0.88        |
| let-7d-5p          | 0.00        | -0.44        | -0.29        | 0.38        | 0.62        |
| miR-30e-5p         | 0.00        | 0.30         | 0.47         | 0.12        | 0.59        |
| miR-21-5p          | 0.00        | 0.02         | -0.01        | 0.96        | 0.81        |
| miR-151a-5p        | 0.00        | 0.06         | 0.29         | 0.29        | 0.41        |
| miR-15b-5p         | 0.00        | -0.06        | -0.21        | 0.36        | 0.43        |
| miR-151a-3p        | 0.00        | 0.05         | 0.06         | 0.84        | 0.96        |
| miR-146a-5p        | 0.00        | 0.13         | 0.15         | 0.55        | 0.92        |
| <b>miR-941</b>     | <b>0.00</b> | <b>0.14</b>  | <b>-0.39</b> | <b>0.08</b> | <b>0.01</b> |
| miR-423-5p         | 0.00        | 0.10         | -0.03        | 0.93        | 0.68        |
| miR-197-3p         | 0.00        | 0.48         | 0.20         | 0.73        | 0.67        |
| miR-181b-5p        | 0.00        | 0.00         | -0.03        | 0.90        | 0.89        |
| miR-484            | 0.00        | 0.26         | 0.26         | 0.53        | 1.00        |
| miR-192-5p         | 0.00        | 0.19         | 0.45         | 0.23        | 0.54        |
| <b>miR-342-3p</b>  | <b>0.00</b> | <b>-0.06</b> | <b>0.14</b>  | <b>0.56</b> | <b>0.35</b> |
| miR-222-3p         | 0.00        | 0.75         | 0.31         | 0.34        | 0.28        |
| miR-27b-3p         | 0.00        | 0.48         | 0.28         | 0.29        | 0.52        |
| miR-3615           | 0.00        | 0.13         | 0.13         | 0.69        | 0.99        |
| miR-144-5p         | 0.00        | 0.34         | 0.57         | 0.25        | 0.67        |
| miR-143-3p         | 0.00        | 0.04         | 0.31         | 0.31        | 0.29        |
| miR-127-3p         | 0.00        | 0.78         | -0.12        | 0.72        | 0.09        |
| miR-23a-3p         | 0.00        | 0.14         | -0.02        | 0.91        | 0.39        |
| miR-652-3p         | 0.00        | 1.16         | 0.86         | 0.50        | 0.84        |
| miR-30e-3p         | 0.00        | 0.06         | 0.73         | 0.06        | 0.10        |
| miR-21-3p          | 0.00        | 0.32         | -0.01        | 0.96        | 0.28        |

|                   |             |              |              |             |             |
|-------------------|-------------|--------------|--------------|-------------|-------------|
| miR-101-3p        | 0.00        | 0.37         | 0.44         | 0.32        | 0.88        |
| miR-425-5p        | 0.00        | 0.39         | -0.02        | 0.93        | 0.13        |
| miR-181c-5p       | 0.00        | 0.09         | 0.39         | 0.20        | 0.36        |
| miR-155-5p        | 0.00        | -0.17        | -0.05        | 0.83        | 0.57        |
| miR-125a-5p       | 0.00        | 0.08         | -0.35        | 0.11        | 0.16        |
| miR-221-3p        | 0.00        | 0.61         | -0.05        | 0.87        | 0.16        |
| miR-769-5p        | 0.00        | 0.24         | 0.14         | 0.58        | 0.76        |
| miR-126-5p        | 0.00        | 0.85         | 0.20         | 0.55        | 0.35        |
| miR-142-5p        | 0.00        | 0.25         | 0.30         | 0.45        | 0.91        |
| miR-4732-3p       | 0.00        | -0.25        | -0.25        | 0.39        | 1.00        |
| miR-17-5p         | 0.00        | 0.14         | 0.23         | 0.41        | 0.76        |
| miR-30b-5p        | 0.00        | 0.27         | 0.44         | 0.16        | 0.58        |
| miR-20a-5p        | 0.00        | 0.31         | 0.38         | 0.27        | 0.88        |
| miR-24-3p         | 0.00        | 0.70         | 0.50         | 0.10        | 0.60        |
| miR-183-5p        | 0.00        | -0.11        | -0.11        | 0.59        | 1.00        |
| let-7d-3p         | 0.00        | -0.05        | -0.24        | 0.34        | 0.34        |
| miR-486-3p        | 0.00        | -0.23        | -0.17        | 0.60        | 0.84        |
| miR-98-5p         | 0.00        | 0.28         | 0.45         | 0.13        | 0.63        |
| miR-532-5p        | 0.00        | -0.07        | 0.18         | 0.47        | 0.25        |
| miR-29a-3p        | 0.00        | 0.64         | 0.62         | 0.04        | 0.95        |
| miR-409-3p        | 0.00        | 0.14         | -0.23        | 0.37        | 0.17        |
| miR-500a-3p       | 0.00        | 0.10         | 0.00         | 0.99        | 0.73        |
| miR-99b-5p        | 0.00        | 0.00         | -0.14        | 0.52        | 0.33        |
| miR-744-5p        | 0.00        | -0.15        | -0.40        | 0.15        | 0.31        |
| <b>miR-23b-3p</b> | <b>0.00</b> | <b>-0.11</b> | <b>-0.36</b> | <b>0.10</b> | <b>0.16</b> |
| miR-363-3p        | 0.00        | -0.13        | 0.31         | 0.34        | 0.17        |
| miR-1307-3p       | 0.00        | 0.23         | 0.01         | 0.98        | 0.66        |
| miR-92b-3p        | 0.00        | -0.20        | -0.37        | 0.14        | 0.45        |
| miR-340-5p        | 0.00        | 0.00         | -0.15        | 0.49        | 0.41        |
| miR-27a-3p        | 0.00        | 0.50         | 0.64         | 0.06        | 0.69        |
| miR-326           | 0.00        | 3.19         | 2.79         | 0.35        | 0.92        |
| miR-328           | 0.00        | 1.27         | 0.63         | 0.64        | 0.70        |
| miR-126-3p        | 0.00        | 0.26         | 0.42         | 0.13        | 0.63        |
| miR-128           | 0.00        | 0.34         | 0.39         | 0.21        | 0.89        |
| let-7e-5p         | 0.00        | -0.19        | -0.35        | 0.14        | 0.43        |
| miR-181a-2-3p     | 0.00        | 0.33         | 0.42         | 0.16        | 0.79        |
| miR-144-3p        | 0.00        | 0.54         | 0.54         | 0.35        | 0.99        |
| miR-345-5p        | 0.00        | 0.09         | 0.24         | 0.37        | 0.61        |
| miR-130a-3p       | 0.00        | 0.00         | 0.17         | 0.49        | 0.39        |
| miR-15a-5p        | 0.00        | 0.09         | 0.34         | 0.25        | 0.38        |
| miR-28-5p         | 0.00        | 0.01         | 0.14         | 0.60        | 0.54        |
| miR-671-3p        | 0.00        | 0.04         | -0.24        | 0.41        | 0.32        |
| miR-106b-3p       | 0.00        | 0.57         | 0.55         | 0.29        | 0.97        |
| miR-146b-3p       | 0.00        | 0.31         | 0.24         | 0.45        | 0.84        |
| miR-454-3p        | 0.00        | 0.16         | 0.13         | 0.64        | 0.94        |
| miR-331-3p        | 0.00        | 0.38         | 0.46         | 0.44        | 0.90        |
| miR-130b-3p       | 0.00        | 0.29         | 0.44         | 0.17        | 0.63        |
| miR-342-5p        | 0.00        | 0.37         | -0.12        | 0.77        | 0.37        |

|                    |             |             |              |             |             |
|--------------------|-------------|-------------|--------------|-------------|-------------|
| miR-10a-5p         | 0.00        | -0.16       | -0.13        | 0.54        | 0.73        |
| miR-194-5p         | 0.00        | 0.25        | 0.44         | 0.17        | 0.60        |
| miR-660-5p         | 0.00        | 0.25        | 0.46         | 0.16        | 0.58        |
| miR-4286           | 0.00        | 1.81        | 1.01         | 0.43        | 0.63        |
| miR-361-5p         | 0.00        | -0.04       | -0.15        | 0.46        | 0.38        |
| miR-106b-5p        | 0.00        | 0.26        | 0.16         | 0.59        | 0.73        |
| miR-185-5p         | 0.00        | 0.69        | 0.29         | 0.32        | 0.35        |
| miR-181a-3p        | 0.00        | 0.17        | 0.47         | 0.09        | 0.24        |
| miR-361-3p         | 0.00        | 0.21        | 0.24         | 0.51        | 0.92        |
| miR-145-5p         | 0.00        | 1.21        | 0.74         | 0.39        | 0.64        |
| miR-20b-5p         | 0.00        | 0.26        | 0.36         | 0.25        | 0.78        |
| <b>miR-31-5p</b>   | <b>0.00</b> | <b>0.30</b> | <b>-0.10</b> | <b>0.69</b> | <b>0.18</b> |
| let-7c             | 0.00        | -0.22       | -0.24        | 0.39        | 0.94        |
| miR-30a-5p         | 0.00        | 0.25        | 0.58         | 0.12        | 0.43        |
| <b>miR-199a-3p</b> | <b>0.00</b> | <b>0.44</b> | <b>0.15</b>  | <b>0.53</b> | <b>0.25</b> |
| miR-199b-3p        | 0.00        | 0.44        | 0.15         | 0.53        | 0.25        |
| miR-664a-3p        | 0.00        | -0.03       | -0.27        | 0.23        | 0.29        |
| miR-324-3p         | 0.00        | 0.52        | 0.70         | 0.37        | 0.84        |
| miR-132-3p         | 0.00        | -0.13       | 0.07         | 0.79        | 0.45        |
| miR-410            | 0.00        | 0.08        | 0.09         | 0.71        | 0.97        |
| miR-148a-5p        | 0.00        | 0.09        | 0.41         | 0.11        | 0.13        |
| miR-142-3p         | 0.00        | 0.43        | 0.20         | 0.58        | 0.62        |
| miR-130b-5p        | 0.00        | -0.15       | -0.41        | 0.09        | 0.19        |
| miR-874            | 0.00        | 1.72        | 1.90         | 0.35        | 0.94        |
| miR-339-3p         | 0.00        | -0.14       | -0.13        | 0.59        | 0.93        |
| miR-766-3p         | 0.00        | 0.44        | 0.43         | 0.51        | 0.99        |
| miR-193a-5p        | 0.00        | -0.10       | -0.23        | 0.28        | 0.24        |
| miR-501-3p         | 0.00        | 0.52        | 0.32         | 0.32        | 0.56        |
| miR-26b-3p         | 0.00        | 0.47        | 0.86         | 0.01        | 0.25        |
| miR-199a-5p        | 0.00        | 0.38        | 0.17         | 0.54        | 0.45        |
| miR-574-3p         | 0.00        | 0.55        | 0.09         | 0.79        | 0.40        |
| miR-1307-5p        | 0.00        | 0.86        | 0.76         | 0.13        | 0.90        |
| miR-181d           | 0.00        | 0.33        | 0.13         | 0.64        | 0.54        |



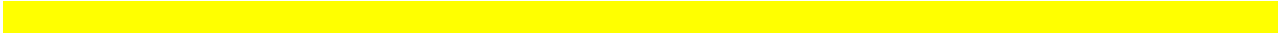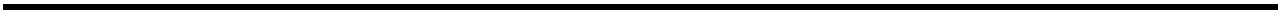



















































































































































































|          |          |          |          |          |          |          |          |          |          |          |
|----------|----------|----------|----------|----------|----------|----------|----------|----------|----------|----------|
| UC       | UC       | UC       | UC       | UC       | UC       | UC       | UC       | UC       | UC       | UC       |
| B_29     | B_32     | B_34     | C_1      | C_40     | C_41     | C_42     | C_44     | C_46     | C_47     | D_15     |
| 2.16E+05 | 7.93E+05 | 2.42E+06 | 2.85E+06 | 1.72E+07 | 4.59E+06 | 2.63E+06 | 1.41E+06 | 4.41E+06 | 7.78E+06 | 6.83E+04 |

|          |          |        |          |          |       |       |          |          |          |       |
|----------|----------|--------|----------|----------|-------|-------|----------|----------|----------|-------|
| UC       | UC       | CHR_NP | UC       | CHR_P    | CHR_P | UC    | CHR_P    | CHR_NP   | CHR_NP   | UC    |
| A_7      | B_29     | C_39   | D_36     | A_18     | D_6   | A_16  | E_3      | A_13     | A_17     | B_32  |
| 1.42E+05 | 2.16E+05 | #####  | 2.91E+05 | 3.57E+05 | ##### | ##### | 5.28E+05 | 6.98E+05 | 7.19E+05 | ##### |







































































| NP<P? | expect |
|-------|--------|
| 0     | 0      |
| 1     | 1      |

1 1

0 0

1 1



0

0

0 0

0 0



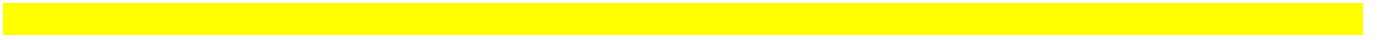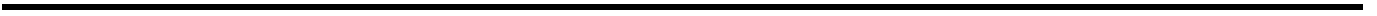



















































































































































































|          |          |          |          |          |          |          |          |          |          |          |
|----------|----------|----------|----------|----------|----------|----------|----------|----------|----------|----------|
| UC       | UC       | UC       | UC       | UC       | UC       | UC       | UC       | UC       | UC       | UC       |
| D_16     | D_17     | D_18     | D_36     | D_4      | E_47     | F_2      | F_43     | F_6      | F_7      | F_8      |
| 1.15E+07 | 3.05E+06 | 4.01E+06 | 2.91E+05 | 4.27E+06 | 3.42E+06 | 8.99E+02 | 2.10E+06 | 3.63E+06 | 3.80E+06 | 3.41E+06 |

|          |        |        |       |          |          |          |          |          |       |        |
|----------|--------|--------|-------|----------|----------|----------|----------|----------|-------|--------|
| CHR_NP   | CHR_NP | CHR_NP | UC    | CHR_P    | CHR_NP   | CHR_NP   | UC       | CHR_P    | UC    | CHR_NP |
| B_30     | G_32   | D_9    | G_33  | B_31     | G_31     | D_12     | G_34     | E_9      | C_44  | G_6    |
| 8.52E+05 | #####  | #####  | ##### | 1.10E+06 | 1.17E+06 | 1.21E+06 | 1.23E+06 | 1.32E+06 | ##### | #####  |



















































































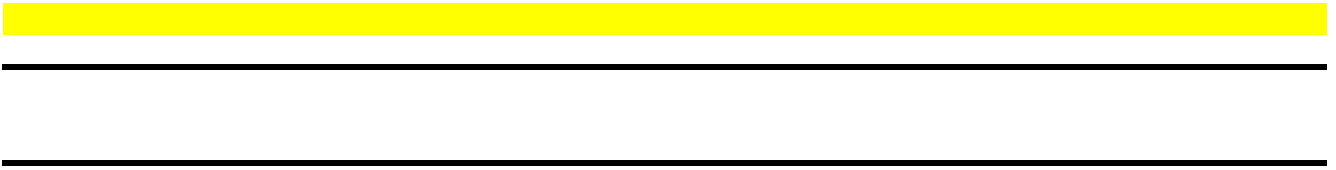



















































































































































































|          |          |          |          |          |          |          |          |          |          |          |
|----------|----------|----------|----------|----------|----------|----------|----------|----------|----------|----------|
| UC       | UC       | UC       | CHR_NP   | CHR_NP   | CHR_NP   | CHR_NP   | CHR_NP   | CHR_NP   | CHR_NP   | CHR_NP   |
| G_33     | G_34     | G_8      | A_1      | A_13     | A_14     | A_15     | A_17     | B_30     | B_33     | C_2      |
| 9.88E+05 | 1.23E+06 | 8.08E+06 | 5.81E+06 | 6.98E+05 | 2.23E+06 | 4.03E+06 | 7.19E+05 | 8.52E+05 | 4.58E+06 | 2.34E+06 |

|       |          |          |       |          |          |          |          |          |       |          |
|-------|----------|----------|-------|----------|----------|----------|----------|----------|-------|----------|
| CHR_P | CHR_NP   | UC       | CHR_P | CHR_NP   | CHR_NP   | UC       | CHR_NP   | CHR_P    | CHR_P | CHR_P    |
| D_11  | F_37     | A_11     | G_9   | D_3      | E_29     | F_43     | A_14     | A_12     | E_21  | E_7      |
| ##### | 1.61E+06 | 1.65E+06 | ##### | 1.81E+06 | 2.09E+06 | 2.10E+06 | 2.23E+06 | 2.27E+06 | ##### | 2.33E+06 |





































































































































































































































































|          |          |          |          |          |          |          |          |          |          |          |
|----------|----------|----------|----------|----------|----------|----------|----------|----------|----------|----------|
| CHR_NP   | CHR_NP   | CHR_NP   | CHR_NP   | CHR_NP   | CHR_NP   | CHR_NP   | CHR_NP   | CHR_NP   | CHR_NP   | CHR_NP   |
| C_37     | C_38     | C_39     | C_43     | C_48     | C_5      | D_10     | D_12     | D_13     | D_14     | D_3      |
| 4.57E+06 | 3.63E+06 | 2.59E+05 | 5.68E+06 | 3.19E+06 | 1.41E+05 | 2.63E+06 | 1.21E+06 | 6.37E+06 | 4.72E+06 | 1.81E+06 |

|        |       |          |       |          |       |        |          |          |       |          |
|--------|-------|----------|-------|----------|-------|--------|----------|----------|-------|----------|
| CHR_NP | UC    | CHR_P    | CHR_P | CHR_NP   | CHR_P | CHR_NP | CHR_NP   | CHR_NP   | UC    | CHR_NP   |
| C_2    | B_34  | E_46     | D_5   | E_5      | E_23  | E_20   | E_6      | D_10     | C_42  | G_30     |
| #####  | ##### | 2.49E+06 | ##### | 2.55E+06 | ##### | #####  | 2.62E+06 | 2.63E+06 | ##### | 2.67E+06 |



















































































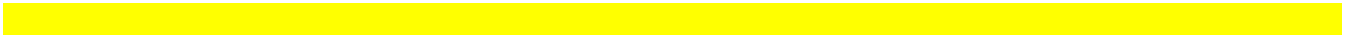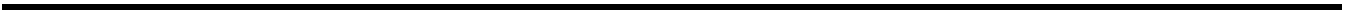



















































































































































































| CHR_NP   | CHR_NP   | CHR_NP   | CHR_NP   | CHR_NP   | CHR_NP   | CHR_NP   | CHR_NP   | CHR_NP   | CHR_NP   | CHR_NP   |
|----------|----------|----------|----------|----------|----------|----------|----------|----------|----------|----------|
| D_9      | E_20     | E_29     | E_4      | E_5      | E_6      | F_1      | F_35     | F_36     | F_37     | F_38     |
| 9.71E+05 | 2.60E+06 | 2.09E+06 | 4.83E+06 | 2.55E+06 | 2.62E+06 | 3.93E+06 | 8.30E+06 | 3.68E+06 | 1.61E+06 | 4.57E+06 |

| UC       | CHR_P    | UC       | CHR_P | CHR_NP   | UC       | UC       | UC    | CHR_NP   | CHR_NP   | CHR_NP   |
|----------|----------|----------|-------|----------|----------|----------|-------|----------|----------|----------|
| C_1      | E_8      | D_17     | A_5   | C_48     | F_8      | E_47     | F_6   | C_38     | F_36     | F_39     |
| 2.85E+06 | 3.01E+06 | 3.05E+06 | ##### | 3.19E+06 | 3.41E+06 | 3.42E+06 | ##### | 3.63E+06 | 3.68E+06 | 3.69E+06 |

















































































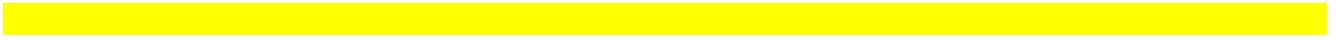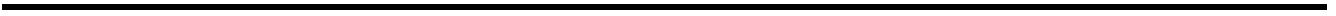



















































































































































































| CHR_NP   | CHR_NP   | CHR_NP   | CHR_NP   | CHR_NP   | CHR_NP   | CHR_NP   | CHR_NP   | CHR_NP   | CHR_P    | CHR_P    |
|----------|----------|----------|----------|----------|----------|----------|----------|----------|----------|----------|
| F_39     | G_3      | G_30     | G_31     | G_32     | G_4      | G_5      | G_6      | G_7      | A_10     | A_12     |
| 3.69E+06 | 4.45E+06 | 2.67E+06 | 1.17E+06 | 8.64E+05 | 1.13E+07 | 6.41E+06 | 1.46E+06 | 6.65E+06 | 3.90E+06 | 2.27E+06 |

| UC       | CHR_P | CHR_P    | CHR_NP   | CHR_P    | UC       | CHR_NP   | CHR_P | CHR_P | UC    | UC       |
|----------|-------|----------|----------|----------|----------|----------|-------|-------|-------|----------|
| F_7      | F_9   | A_10     | F_1      | E_22     | D_18     | A_15     | G_10  | F_42  | D_4   | C_46     |
| 3.80E+06 | ##### | 3.90E+06 | 3.93E+06 | 4.00E+06 | 4.01E+06 | 4.03E+06 | ##### | ##### | ##### | 4.41E+06 |







































































































































































































































































| CHR_P    | CHR_P    | CHR_P    | CHR_P    | CHR_P    | CHR_P    | CHR_P    | CHR_P    | CHR_P    | CHR_P    |
|----------|----------|----------|----------|----------|----------|----------|----------|----------|----------|
| A_18     | A_3      | A_5      | A_6      | A_8      | A_9      | B_31     | C_4      | C_45     | D_11     |
| 3.57E+05 | 5.81E+06 | 3.12E+06 | 4.49E+06 | 3.08E+03 | 8.23E+04 | 1.10E+06 | 5.44E+06 | 1.14E+07 | 1.53E+06 |

| CHR_NP | CHR_P    | CHR_P    | CHR_NP   | CHR_NP   | CHR_NP   | UC       | CHR_NP   | CHR_NP   | CHR_P    |
|--------|----------|----------|----------|----------|----------|----------|----------|----------|----------|
| G_3    | A_6      | F_44     | F_38     | C_37     | B_33     | C_41     | D_14     | E_4      | F_41     |
| #####  | 4.49E+06 | 4.50E+06 | 4.57E+06 | 4.57E+06 | 4.58E+06 | 4.59E+06 | 4.72E+06 | 4.83E+06 | 5.30E+06 |







































































































































































































































































| CHR_P    | CHR_P    | CHR_P    | CHR_P    | CHR_P    | CHR_P    | CHR_P    | CHR_P    | CHR_P    | CHR_P    |
|----------|----------|----------|----------|----------|----------|----------|----------|----------|----------|
| D_35     | D_5      | D_6      | E_19     | E_21     | E_22     | E_23     | E_3      | E_46     | E_48     |
| 5.41E+06 | 2.50E+06 | 3.77E+05 | 1.19E+07 | 2.30E+06 | 4.00E+06 | 2.56E+06 | 5.28E+05 | 2.49E+06 | 1.29E+07 |

| CHR_P    | CHR_P    | CHR_P    | UC       | CHR_NP   | CHR_NP   | CHR_P    | CHR_NP   | CHR_NP   | CHR_NP   |
|----------|----------|----------|----------|----------|----------|----------|----------|----------|----------|
| D_35     | C_4      | F_40     | A_2      | C_43     | A_1      | A_3      | D_13     | G_5      | G_7      |
| 5.41E+06 | 5.44E+06 | 5.51E+06 | 5.58E+06 | 5.68E+06 | 5.81E+06 | 5.81E+06 | 6.37E+06 | 6.41E+06 | 6.65E+06 |

















































































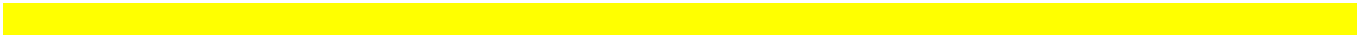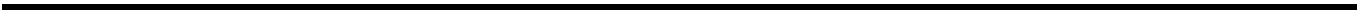



















































































































































































| CHR_P    | CHR_P    | CHR_P    | CHR_P    | CHR_P    | CHR_P    | CHR_P    | CHR_P    | CHR_P    | CHR_P    |
|----------|----------|----------|----------|----------|----------|----------|----------|----------|----------|
| E_7      | E_8      | E_9      | F_40     | F_41     | F_42     | F_44     | F_9      | G_10     | G_9      |
| 2.33E+06 | 3.01E+06 | 1.32E+06 | 5.51E+06 | 5.30E+06 | 4.18E+06 | 4.50E+06 | 3.84E+06 | 4.04E+06 | 1.67E+06 |

| UC       | UC       | CHR_NP   | UC       | CHR_NP   | CHR_P    | UC       | CHR_P    | CHR_P    | UC       |
|----------|----------|----------|----------|----------|----------|----------|----------|----------|----------|
| C_47     | G_8      | F_35     | A_4      | G_4      | C_45     | D_16     | E_19     | E_48     | C_40     |
| 7.78E+06 | 8.08E+06 | 8.30E+06 | 8.89E+06 | 1.13E+07 | 1.14E+07 | 1.15E+07 | 1.19E+07 | 1.29E+07 | 1.72E+07 |



























































































































































































































































































































































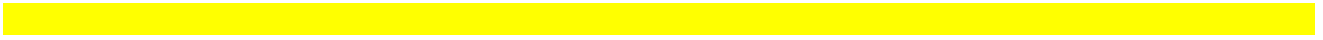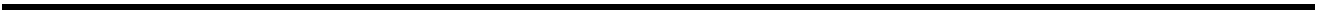

































































































































































































































































































































































































































































































































































































































































































































relabelin

NP

40

48

48

48

51

47

39

36

41

38

45

44

58

36

42

39

34

34

50

39

26

40

36

35

48

32

40

35

47

34

40

33

53

34

36

29

45

46

30

43

39

45

37

51

34

34

39

41

39

38

41

45  
47  
34  
38  
42  
36  
43  
42  
40  
38  
31  
45  
49  
63  
29  
30  
42  
37  
37  
44  
46  
53  
43  
30  
37  
44  
42  
36  
32  
60  
46  
76  
40  
29  
30  
34  
38  
45  
44  
36  
39  
41  
32  
39  
40  
55  
50  
40  
34  
46  
24  
33  
41  
38  
33  
36  
43  
48  
40

40  
36  
51  
47  
41  
44  
37  
46  
38  
30  
41  
35  
39  
43  
25  
51  
44  
40  
45  
45  
33  
40  
39  
40  
42  
34  
38  
38  
48  
47  
42  
42  
35  
41  
47  
57  
39  
45  
35  
54  
30  
40  
61  
59  
36  
44  
50  
36  
37  
45  
40  
49  
40  
42  
56  
44  
60  
42  
34

41  
39  
48  
36  
49  
56  
34  
35  
38  
51  
42  
47  
38  
48  
39  
51  
32  
36  
38  
37  
43  
35  
36  
35  
46  
35  
44  
43  
59  
33  
38  
46  
47  
29  
39  
36  
50  
38  
40  
42  
33  
43  
50  
38  
36  
35  
41  
48  
39  
36  
36  
41  
53  
36  
41  
50  
44  
55  
38

59  
36  
36  
39  
44  
43  
40  
43  
38  
38  
47  
53  
48  
37  
48  
48  
31  
37  
47  
39  
37  
43  
44  
40  
42  
42  
43  
36  
40  
45  
48  
42  
40  
50  
49  
40  
35  
46  
40  
40  
34  
48  
37  
47  
47  
47  
37  
40  
32  
47  
43  
35  
26  
36  
35  
48  
47  
36  
30

40  
38  
42  
56  
49  
31  
49  
37  
58  
26  
41  
48  
31  
20  
48  
25  
34  
33  
41  
27  
37  
32  
42  
46  
37  
37  
27  
37  
43  
48  
33  
43  
26  
53  
49  
57  
31  
35  
40  
41  
33  
32  
48  
40  
42  
41  
49  
24  
47  
59  
40  
64  
44  
41  
38  
39  
36  
62  
51



35  
40  
31  
43  
39  
40  
39  
38  
48  
34  
40  
39  
57  
44  
37  
52  
37  
49  
40  
41  
41  
35  
63  
43  
34  
54  
44  
57  
64  
48  
43  
40  
35  
49  
40  
37  
60  
58  
45  
41  
45  
36  
54  
31  
33  
42  
52  
27  
41  
44  
38  
62  
42  
37  
46  
38  
52  
42  
36

36  
53  
36  
46  
29  
43  
38  
32  
35  
48  
36  
44  
51  
33  
42  
47  
48  
33  
39  
40  
31  
47  
42  
46  
24  
47  
34  
30  
37  
66  
50  
35  
52  
43  
43  
44  
43  
32  
29  
34  
38  
31  
23  
51  
45  
44  
40  
42  
27  
38  
34  
47  
35  
45  
47  
34  
45  
42  
48

47  
37  
42  
44  
32  
48  
35  
37  
46  
37  
34  
49  
40  
40  
24  
53  
34  
32  
50  
32  
35  
35  
44  
49  
52  
46  
33  
44  
46  
40  
42  
36  
35  
45  
53  
36  
33  
41  
43  
43  
42  
34  
51  
59  
52  
51  
46  
43  
43  
45  
31  
28  
40  
35  
46  
20  
42  
48  
35

32  
37  
42  
44  
26  
55  
43  
32  
54  
30  
33  
30  
49  
45  
38  
46  
35  
40  
39  
49  
53  
49  
42  
45  
37  
43  
41  
49  
55  
41  
41  
46  
39  
35  
41  
31  
31  
40  
28  
39  
48  
42  
40  
42  
50  
50  
38  
47  
43  
40  
27  
58  
50  
44  
47  
38  
35  
33

46  
44  
35  
33  
56  
41  
36  
31  
40  
39  
26  
30  
43  
34  
36  
34  
51  
40  
41  
37  
23  
33  
33  
41  
30  
42  
48  
44  
46  
39  
32  
42  
45  
29  
31  
33  
41  
51  
29  
31  
48  
38  
37  
48  
38  
36  
58  
47  
44  
40  
51  
46  
37  
36  
41  
46  
28  
31  
43

41  
29  
41  
35  
50  
41  
41  
44  
45  
41  
44  
53  
45  
38  
61  
31  
32  
32  
44  
55  
42  
45  
46  
53  
58  
40  
32  
40  
35  
47  
43  
48  
42  
38  
49  
41  
38  
50  
49  
48  
41  
41  
39  
49  
34  
29  
43  
42  
47  
50  
58  
38  
37  
45  
53  
41  
38  
37  
36

36  
48  
33  
45  
49  
39  
29  
31  
42  
43  
36  
42  
43  
43  
59  
33  
47  
48  
48  
44  
49  
50  
42  
41  
35  
39  
52  
36  
45  
38  
35  
27  
36  
43  
37  
42  
37  
38  
43  
44  
49  
47  
42  
48  
39  
46  
53  
38  
51  
31  
32  
41  
40  
49  
41  
40  
35  
36  
41

53  
47  
32  
28  
29  
44  
41  
40  
39  
32  
39  
42  
36  
36  
32  
31  
34  
32  
41  
43  
38  
54  
44  
28  
52  
41  
49  
44  
35  
41  
52  
45  
37  
67  
48  
46  
44  
37  
39  
48  
36  
43  
41  
46  
40  
39  
35  
43  
41  
32  
45  
46  
29  
37  
34  
33  
35  
43  
49



43  
35  
35  
43  
36  
43  
53  
44  
47  
46  
34  
32  
36  
33  
41  
27  
41  
37  
33  
36  
31  
45  
37  
36  
35  
36  
38  
38  
53  
41  
47  
57  
42  
35  
52  
25  
45  
48  
39  
36  
33  
44  
51  
41  
35  
36  
26  
40  
45  
37  
39  
51  
41  
36  
48  
42  
49  
47  
35

32  
45  
28  
35  
54  
51  
34  
38  
34  
50  
49  
44  
51  
40  
47  
47  
39  
31  
60  
28  
31  
42  
33  
30  
49  
31  
47  
45  
49  
39  
55  
35  
45  
32  
34  
36  
50  
30  
46  
50  
40  
36  
41  
35  
40  
34  
40  
44  
45  
57  
38  
33  
40  
43  
39  
42  
46  
38  
41

39  
40  
38  
40  
54  
39  
40  
45  
39  
32  
34  
48  
40  
44  
38  
41  
38  
55  
38  
31  
38  
48  
43  
40  
49  
38  
43  
62  
43  
55  
51  
40  
55  
36  
52  
34  
43  
33  
42  
43  
46  
45  
39  
42  
36  
49  
26  
37  
34  
49  
28  
38  
42  
46  
68  
31  
40  
40  
33

37  
34  
29  
37  
41  
28  
58  
37  
60  
34  
25  
28  
40  
43  
39  
42  
42  
33  
41  
52  
48  
41  
37  
40  
45  
38  
44  
39  
30  
50  
31  
36  
47  
36  
43  
40  
40  
43  
29  
37  
40  
35  
39  
33  
41  
39  
36  
43  
38  
23  
30  
32  
34  
51  
45  
41  
43  
38  
43

44  
34  
39  
41  
42  
35  
39  
51  
40  
57  
35  
43  
32  
43  
49  
35  
50  
43  
31  
41  
40  
49  
32  
41  
42  
42  
35  
41  
35  
35  
41  
35  
34  
53  
46  
45  
37  
47

36  
41  
41  
46  
39  
35  
41  
31  
31  
40  
28  
39  
48  
42  
40  
42

50  
50  
38  
47  
43  
40  
27  
58  
50  
44  
47  
38  
35  
33  
46  
44  
35  
33  
56  
41  
36  
31  
40  
39  
26  
30  
43  
34  
36  
34  
51  
40  
41  
37  
23  
33  
33  
41  
30  
42  
48  
44  
46  
39  
32  
42  
45  
29  
31  
33  
41  
51  
29  
31  
48  
38  
37  
48  
38

36  
58  
47  
44  
40  
51  
46  
37  
36  
41  
46  
28  
31  
43  
41  
29  
41  
35  
50  
41  
41  
44  
45  
41  
44  
53  
45  
38  
61  
31  
32  
32  
44  
55  
42  
45  
46  
53  
58  
40  
32  
40  
35  
47  
43  
48  
42  
38  
49  
41  
38  
50  
49  
48  
41  
41  
39  
49  
34

29  
43  
42  
47  
50  
58  
38  
37  
45  
53  
41  
38  
37  
36  
36  
48  
33  
45  
49  
39  
29  
31  
42  
43  
36  
42  
43  
43  
59  
33  
47  
48  
48  
44  
49  
50  
42  
41  
35  
39  
52  
36  
45  
38  
35  
27  
36  
43  
37  
42  
37  
38  
43  
44  
49  
47  
42  
48  
39



46  
53  
38  
51  
31  
32  
41  
40  
49  
41  
40  
35  
36  
41  
53  
47  
32  
28  
29  
44  
41  
40  
39  
32  
39  
42  
36  
36  
32  
31  
34  
32  
41  
43  
38  
54  
44  
28  
52  
41  
49  
44  
35  
41  
52  
45  
37  
67  
48  
46  
44  
37  
39  
48  
36  
43  
41  
46  
40

39  
35  
43  
41  
32  
45  
46  
29  
37  
34  
33  
35  
43  
49  
43  
35  
35  
43  
36  
43  
53  
44  
47  
46  
34  
32  
36  
33  
41  
27  
41  
37  
33  
36  
31  
45  
37  
36  
35  
36  
38  
38  
53  
41  
47  
57  
42  
35  
52  
25  
45  
48  
39  
36  
33  
44  
51  
41  
35

36  
26  
40  
45  
37  
39  
51  
41  
36  
48  
42  
49  
47  
35  
32  
45  
28  
35  
54  
51  
34  
38  
34  
50  
49  
44  
51  
40  
47  
47  
39  
31  
60  
28  
31  
42  
33  
30  
49  
31  
47  
45  
49  
39  
55  
35  
45  
32  
34  
36  
50  
30  
46  
50  
40  
36  
41  
35  
40

34  
40  
44  
45  
57  
38  
33  
40  
43  
39  
42  
46  
38  
41  
39  
40  
38  
40  
54  
39  
40  
45  
39  
32  
34  
48  
40  
44  
38  
41  
38  
55  
38  
31  
38  
48  
43  
40  
49  
38  
43  
62  
43  
55  
51  
40  
55  
36  
52  
34  
43  
33  
42  
43  
46  
45  
39  
42  
36

49  
26  
37  
34  
49  
28  
38  
42  
46  
68  
31  
40  
40  
33  
37  
34  
29  
37  
41  
28  
58  
37  
60  
34  
25  
28  
40  
43  
39  
42  
42  
33  
41  
52  
48  
41  
37  
40  
45  
38  
44  
39  
30  
50  
31  
36  
47  
36  
43  
40  
40  
43  
29  
37  
40  
35  
39  
33  
41

39  
36  
43  
38  
23  
30  
32  
34  
51  
45  
41  
43  
38  
43  
44  
34  
39  
41  
42  
35  
39  
51  
40  
57  
35  
43  
32  
43  
49  
35  
50  
43  
31  
41  
40  
49  
32  
41  
42  
42  
35  
41  
35  
35  
41  
35  
34  
53  
46  
45  
37  
47  
38  
45  
40  
45  
37  
40  
50

49  
35  
35  
54  
38  
49  
41  
46  
41  
49  
36  
40  
37  
38  
44  
52  
45  
45  
24  
54  
68  
34  
48  
31  
53  
32  
41  
50  
37  
32  
42  
44  
37  
32  
33  
34  
43  
27  
39  
45  
41  
44  
30  
36  
20  
36  
38  
39  
41  
36  
47  
40  
40  
40  
38  
45  
39  
34  
55

|    |    |
|----|----|
|    | 30 |
|    | 39 |
|    | 39 |
|    | 55 |
|    | 53 |
|    | 56 |
|    | 56 |
|    | 32 |
|    | 33 |
|    | 42 |
|    | 23 |
|    | 49 |
|    | 32 |
|    | 37 |
|    | 42 |
|    | 26 |
|    | 38 |
|    | 31 |
|    | 47 |
|    | 41 |
|    | 50 |
|    | 50 |
|    | 33 |
|    | 31 |
|    | 45 |
|    | 31 |
|    | 39 |
|    | 50 |
|    | 35 |
|    | 33 |
|    | 32 |
|    | 37 |
|    | 39 |
|    | 41 |
|    | 41 |
|    | 43 |
|    | 30 |
|    | 36 |
|    | 36 |
|    | 45 |
| 37 | 44 |
| 40 | 34 |
| 31 | 53 |
| 32 | 47 |
| 44 | 37 |
| 36 | 53 |
| 40 | 36 |
| 43 | 37 |
| 51 | 30 |
| 26 | 44 |
| 41 | 27 |
| 38 | 53 |
| 42 | 39 |
| 34 | 32 |
| 46 | 46 |
| 41 | 33 |
| 51 | 30 |
| 55 | 33 |
| 45 | 41 |



|    |    |
|----|----|
| 61 | 28 |
| 41 | 32 |
| 40 | 53 |
| 42 | 52 |
| 31 | 32 |
| 38 | 38 |
| 41 | 33 |
| 32 | 39 |
| 35 | 42 |
| 44 | 59 |
| 36 | 38 |
| 43 | 24 |
| 38 | 52 |
| 44 | 39 |
| 56 | 54 |
| 39 | 45 |
| 48 | 32 |
| 27 | 45 |
| 33 | 39 |
| 47 | 38 |
| 47 | 35 |
| 40 | 41 |
| 39 | 42 |
| 39 | 33 |
| 43 | 51 |
| 41 | 32 |
| 45 | 34 |
| 42 | 53 |
| 39 | 37 |
| 35 | 41 |
| 39 | 52 |
| 51 | 39 |
| 40 | 50 |
| 32 | 44 |
| 43 | 34 |
| 40 | 49 |
| 52 | 38 |
| 51 | 31 |
| 38 | 56 |
| 49 | 44 |
| 37 | 57 |
| 36 | 42 |
| 44 | 52 |
| 47 | 44 |
| 29 | 36 |
| 39 | 49 |
| 52 | 38 |
| 36 | 40 |
| 40 | 48 |
| 42 | 41 |
| 45 | 36 |
| 45 | 32 |
| 42 | 50 |
| 41 | 42 |
| 40 | 50 |
| 38 | 32 |
| 39 | 40 |
| 43 | 40 |
| 61 | 33 |

|    |    |
|----|----|
| 49 | 42 |
| 38 | 41 |
| 55 | 29 |
| 42 | 45 |
| 40 | 31 |
| 29 | 55 |
| 43 | 42 |
| 55 | 46 |
| 34 | 50 |
| 38 | 33 |
| 33 | 40 |
| 30 | 42 |
| 34 | 37 |
| 47 | 36 |
| 33 | 69 |
| 47 | 46 |
| 50 | 22 |
| 32 | 51 |
| 44 | 36 |
| 28 | 40 |
| 38 | 49 |
| 38 | 36 |
| 37 | 41 |
| 37 | 48 |
| 43 | 45 |
| 43 | 39 |
| 34 | 52 |
| 44 | 35 |
| 49 | 43 |
| 27 | 47 |
| 39 | 29 |
| 51 | 36 |
| 41 | 37 |
| 32 | 37 |
| 30 | 45 |
| 40 | 45 |
| 37 | 44 |
| 45 | 40 |
| 48 | 41 |
| 47 | 41 |
| 50 | 38 |
| 36 | 50 |
| 33 | 44 |
| 35 | 41 |
| 56 | 28 |
| 37 | 38 |
| 40 | 43 |
| 37 | 35 |
| 41 | 40 |
| 30 | 51 |
| 39 | 46 |
| 31 | 42 |
| 35 | 45 |
| 37 | 58 |
| 41 | 31 |
| 38 | 33 |
| 29 | 55 |
| 38 | 36 |
| 50 | 56 |

|    |    |
|----|----|
| 39 | 39 |
| 35 | 34 |
| 47 | 35 |
| 34 | 40 |
| 33 | 54 |
| 42 | 40 |
| 39 | 52 |
| 33 | 45 |
| 27 | 40 |
| 37 | 53 |
| 32 | 51 |
| 41 | 46 |
| 40 | 41 |
| 35 | 50 |
| 41 | 33 |
| 43 | 28 |
| 33 | 38 |
| 38 | 43 |
| 54 | 37 |
| 35 | 40 |
| 31 | 34 |
| 47 | 38 |
| 35 | 48 |
| 33 | 35 |
| 38 | 35 |
| 44 | 34 |
| 51 | 47 |
| 35 | 37 |
| 35 | 41 |
| 29 | 41 |





























































































































































































g+reselection of 29s

| P  | UC |
|----|----|
| 41 | 39 |
| 38 | 36 |
| 51 | 30 |
| 43 | 41 |
| 41 | 39 |
| 31 | 41 |
| 42 | 29 |
| 47 | 31 |
| 38 | 36 |
| 46 | 39 |
| 47 | 41 |
| 27 | 40 |
| 50 | 34 |
| 35 | 53 |
| 40 | 50 |
| 44 | 34 |
| 41 | 41 |
| 45 | 44 |
| 44 | 48 |
| 40 | 56 |
| 39 | 43 |
| 42 | 52 |
| 33 | 57 |
| 40 | 39 |
| 29 | 44 |
| 46 | 45 |
| 43 | 35 |
| 44 | 51 |
| 32 | 38 |
| 33 | 48 |
| 46 | 30 |
| 54 | 45 |
| 39 | 26 |
| 42 | 44 |
| 61 | 41 |
| 42 | 59 |
| 49 | 32 |
| 46 | 33 |
| 35 | 42 |
| 41 | 48 |
| 32 | 40 |
| 42 | 54 |
| 31 | 52 |
| 46 | 29 |
| 48 | 50 |
| 39 | 37 |
| 40 | 29 |
| 36 | 38 |
| 54 | 48 |
| 61 | 38 |
| 49 | 33 |



|    |    |
|----|----|
| 45 | 51 |
| 31 | 37 |
| 51 | 46 |
| 39 | 42 |
| 46 | 47 |
| 30 | 52 |
| 47 | 36 |
| 39 | 49 |
| 40 | 40 |
| 44 | 55 |
| 43 | 58 |
| 43 | 51 |
| 43 | 25 |
| 27 | 52 |
| 39 | 55 |
| 32 | 51 |
| 44 | 29 |
| 53 | 31 |
| 46 | 50 |
| 42 | 39 |
| 20 | 42 |
| 29 | 42 |
| 40 | 34 |
| 44 | 48 |
| 43 | 37 |
| 39 | 43 |
| 54 | 33 |
| 51 | 32 |
| 41 | 55 |
| 37 | 28 |
| 31 | 46 |
| 43 | 38 |
| 42 | 36 |
| 52 | 47 |
| 61 | 54 |
| 41 | 50 |
| 32 | 39 |
| 34 | 46 |
| 42 | 39 |
| 36 | 45 |
| 35 | 52 |
| 36 | 54 |
| 46 | 31 |
| 49 | 34 |
| 36 | 39 |
| 36 | 45 |
| 39 | 28 |
| 52 | 34 |
| 42 | 42 |
| 31 | 50 |
| 55 | 43 |
| 54 | 36 |
| 55 | 38 |
| 37 | 68 |
| 36 | 39 |
| 50 | 35 |
| 45 | 36 |
| 29 | 58 |
| 44 | 44 |

|    |    |
|----|----|
| 41 | 47 |
| 40 | 34 |
| 53 | 30 |
| 44 | 33 |
| 44 | 40 |
| 53 | 40 |
| 34 | 40 |
| 38 | 35 |
| 36 | 54 |
| 39 | 27 |
| 44 | 32 |
| 36 | 35 |
| 52 | 33 |
| 35 | 54 |
| 46 | 40 |
| 30 | 38 |
| 35 | 38 |
| 62 | 32 |
| 37 | 52 |
| 45 | 47 |
| 56 | 46 |
| 26 | 43 |
| 61 | 37 |
| 43 | 31 |
| 45 | 44 |
| 26 | 48 |
| 39 | 44 |
| 38 | 45 |
| 38 | 41 |
| 47 | 46 |
| 38 | 51 |
| 46 | 41 |
| 45 | 46 |
| 43 | 38 |
| 32 | 45 |
| 41 | 49 |
| 49 | 35 |
| 34 | 39 |
| 50 | 37 |
| 26 | 49 |
| 42 | 43 |
| 50 | 51 |
| 33 | 41 |
| 39 | 37 |
| 41 | 42 |
| 39 | 31 |
| 44 | 30 |
| 42 | 33 |
| 50 | 39 |
| 40 | 37 |
| 31 | 44 |
| 51 | 39 |
| 51 | 42 |
| 37 | 35 |
| 28 | 43 |
| 48 | 43 |
| 41 | 23 |
| 43 | 45 |
| 54 | 44 |

|    |    |
|----|----|
| 33 | 50 |
| 42 | 50 |
| 45 | 39 |
| 46 | 40 |
| 35 | 48 |
| 39 | 45 |
| 45 | 35 |
| 31 | 49 |
| 72 | 21 |
| 41 | 34 |
| 36 | 45 |
| 49 | 44 |
| 52 | 42 |
| 34 | 29 |
| 48 | 38 |
| 45 | 43 |
| 36 | 51 |
| 46 | 38 |
| 50 | 39 |
| 36 | 53 |
| 49 | 29 |
| 40 | 30 |
| 62 | 36 |
| 42 | 49 |
| 27 | 55 |
| 43 | 40 |
| 43 | 42 |
| 38 | 32 |
| 39 | 39 |
| 56 | 42 |
| 59 | 28 |
| 43 | 27 |
| 40 | 34 |
| 45 | 41 |
| 46 | 50 |
| 31 | 42 |
| 45 | 23 |
| 41 | 48 |
| 41 | 39 |
| 41 | 34 |
| 64 | 35 |
| 42 | 39 |
| 23 | 59 |
| 42 | 38 |
| 38 | 42 |
| 30 | 48 |
| 37 | 52 |
| 49 | 37 |
| 30 | 46 |
| 35 | 42 |
| 49 | 34 |
| 40 | 36 |
| 49 | 40 |
| 43 | 37 |
| 36 | 41 |
| 39 | 38 |
| 42 | 48 |
| 36 | 47 |
| 37 | 31 |

|    |    |
|----|----|
| 31 | 38 |
| 54 | 49 |
| 24 | 58 |
| 38 | 54 |
| 32 | 38 |
| 37 | 32 |
| 37 | 42 |
| 38 | 55 |
| 38 | 39 |
| 36 | 38 |
| 45 | 32 |
| 40 | 37 |
| 38 | 36 |
| 51 | 35 |
| 40 | 44 |
| 36 | 36 |
| 54 | 37 |
| 36 | 33 |
| 38 | 48 |
| 39 | 54 |
| 28 | 44 |
| 44 | 48 |
| 29 | 34 |
| 34 | 36 |
| 40 | 36 |
| 41 | 44 |
| 45 | 55 |
| 47 | 36 |
| 36 | 48 |
| 35 | 45 |
| 50 | 42 |
| 36 | 37 |
| 41 | 47 |
| 37 | 35 |
| 44 | 28 |
| 35 | 41 |
| 37 | 36 |
| 29 | 43 |
| 37 | 50 |
| 42 | 32 |
| 44 | 49 |
| 42 | 34 |
| 36 | 44 |
| 50 | 41 |
| 42 | 35 |
| 38 | 39 |
| 35 | 31 |
| 51 | 39 |
| 51 | 36 |
| 35 | 47 |
| 37 | 44 |
| 42 | 42 |
| 36 | 56 |
| 45 | 36 |
| 39 | 40 |
| 36 | 40 |
| 44 | 43 |
| 38 | 41 |
| 42 | 38 |

|    |    |
|----|----|
| 39 | 41 |
| 40 | 46 |
| 32 | 39 |
| 37 | 26 |
| 48 | 52 |
| 41 | 59 |
| 36 | 34 |
| 50 | 43 |
| 35 | 37 |
| 50 | 47 |
| 34 | 38 |
| 41 | 51 |
| 36 | 40 |
| 50 | 37 |
| 37 | 41 |
| 52 | 44 |
| 44 | 40 |
| 27 | 48 |
| 34 | 55 |
| 39 | 36 |
| 36 | 45 |
| 31 | 39 |
| 44 | 54 |
| 39 | 33 |
| 41 | 54 |
| 35 | 46 |
| 45 | 53 |
| 51 | 37 |
| 42 | 34 |
| 35 | 46 |
| 40 | 51 |
| 37 | 45 |
| 46 | 37 |
| 32 | 31 |
| 31 | 39 |
| 32 | 42 |
| 32 | 56 |
| 37 | 45 |
| 42 | 42 |
| 43 | 31 |
| 38 | 37 |
| 39 | 52 |
| 46 | 35 |
| 41 | 32 |
| 35 | 52 |
| 49 | 44 |
| 59 | 26 |
| 46 | 41 |
| 36 | 50 |
| 38 | 31 |
| 45 | 32 |
| 35 | 30 |
| 34 | 50 |
| 33 | 44 |
| 39 | 44 |
| 49 | 36 |
| 31 | 52 |
| 24 | 35 |
| 45 | 32 |

|    |    |
|----|----|
| 34 | 51 |
| 43 | 37 |
| 55 | 37 |
| 44 | 39 |
| 51 | 38 |
| 39 | 37 |
| 32 | 47 |
| 37 | 41 |
| 43 | 44 |
| 46 | 40 |
| 48 | 41 |
| 43 | 44 |
| 38 | 44 |
| 30 | 51 |
| 41 | 42 |
| 36 | 40 |
| 48 | 33 |
| 31 | 42 |
| 33 | 49 |
| 33 | 49 |
| 33 | 33 |
| 40 | 43 |
| 29 | 45 |
| 44 | 31 |
| 48 | 48 |
| 40 | 36 |
| 34 | 49 |
| 34 | 32 |
| 43 | 33 |
| 48 | 31 |
| 43 | 34 |
| 47 | 41 |
| 45 | 51 |
| 42 | 43 |
| 36 | 56 |
| 51 | 31 |
| 34 | 33 |
| 44 | 30 |
| 46 | 31 |
| 42 | 41 |
| 34 | 48 |
| 45 | 32 |
| 46 | 35 |
| 49 | 43 |
| 42 | 34 |
| 40 | 40 |
| 48 | 24 |
| 48 | 53 |
| 43 | 31 |
| 55 | 42 |
| 47 | 32 |
| 36 | 37 |
| 35 | 30 |
| 41 | 43 |
| 40 | 41 |
| 38 | 48 |
| 47 | 37 |
| 35 | 41 |
| 50 | 52 |

|    |    |
|----|----|
| 45 | 43 |
| 37 | 44 |
| 38 | 42 |
| 36 | 36 |
| 38 | 40 |
| 34 | 46 |
| 44 | 45 |
| 47 | 44 |
| 55 | 50 |
| 42 | 34 |
| 45 | 43 |
| 40 | 43 |
| 29 | 41 |
| 47 | 40 |
| 35 | 41 |
| 33 | 37 |
| 34 | 36 |
| 59 | 38 |
| 37 | 43 |
| 37 | 45 |
| 35 | 45 |
| 34 | 48 |
| 45 | 42 |
| 35 | 45 |
| 32 | 48 |
| 32 | 37 |
| 33 | 40 |
| 68 | 34 |
| 38 | 52 |
| 38 | 30 |
| 35 | 40 |
| 48 | 29 |
| 31 | 37 |
| 39 | 39 |
| 47 | 43 |
| 54 | 25 |
| 42 | 39 |
| 52 | 30 |
| 47 | 60 |
| 42 | 28 |
| 39 | 41 |
| 36 | 45 |
| 33 | 58 |
| 41 | 46 |
| 42 | 55 |
| 34 | 32 |
| 32 | 36 |
| 48 | 37 |
| 48 | 45 |
| 40 | 40 |
| 35 | 66 |
| 38 | 49 |
| 38 | 48 |
| 37 | 44 |
| 46 | 35 |
| 41 | 46 |
| 35 | 32 |
| 39 | 43 |
| 29 | 42 |

|    |    |
|----|----|
| 36 | 37 |
| 34 | 47 |
| 44 | 39 |
| 50 | 43 |
| 50 | 37 |
| 33 | 42 |
| 39 | 44 |
| 37 | 36 |
| 42 | 42 |
| 29 | 43 |
| 26 | 37 |
| 41 | 34 |
| 46 | 35 |
| 27 | 61 |
| 58 | 41 |
| 53 | 33 |
| 44 | 30 |
| 38 | 46 |
| 36 | 25 |
| 43 | 52 |
| 46 | 39 |
| 42 | 41 |
| 44 | 32 |
| 52 | 34 |
| 35 | 30 |
| 39 | 38 |
| 33 | 41 |
| 29 | 35 |
| 42 | 47 |
| 54 | 29 |
| 41 | 32 |
| 46 | 31 |
| 52 | 30 |
| 50 | 31 |
| 42 | 31 |
| 40 | 50 |
| 37 | 40 |
| 48 | 36 |
| 23 | 49 |
| 53 | 39 |
| 44 | 37 |
| 44 | 47 |
| 32 | 37 |
| 37 | 39 |
| 44 | 34 |
| 34 | 36 |
| 47 | 43 |
| 46 | 39 |
| 35 | 40 |
| 39 | 41 |
| 40 | 40 |
| 41 | 40 |
| 37 | 38 |
| 43 | 38 |
| 49 | 44 |
| 60 | 35 |
| 32 | 43 |
| 44 | 29 |
| 44 | 28 |



|    |    |
|----|----|
| 42 | 58 |
| 38 | 41 |
| 43 | 31 |
| 40 | 51 |
| 48 | 48 |
| 28 | 54 |
| 35 | 57 |
| 41 | 45 |
| 31 | 29 |
| 47 | 40 |
| 34 | 44 |
| 48 | 45 |
| 36 | 33 |
| 50 | 33 |
| 41 | 44 |
| 46 | 32 |
| 45 | 49 |
| 28 | 49 |
| 38 | 38 |
| 33 | 45 |
| 32 | 59 |
| 48 | 39 |
| 37 | 48 |
| 37 | 51 |
| 36 | 36 |
| 39 | 42 |
| 42 | 28 |
| 31 | 41 |
| 33 | 40 |
| 39 | 38 |
| 34 | 51 |
| 45 | 38 |
| 54 | 38 |
| 44 | 36 |
| 43 | 41 |
| 54 | 46 |
| 48 | 50 |
| 52 | 36 |
| 50 | 38 |
| 47 | 44 |
| 28 | 44 |
| 46 | 34 |
| 39 | 37 |
| 46 | 46 |
| 39 | 37 |
| 50 | 30 |
| 37 | 50 |
| 38 | 42 |
| 40 | 44 |
| 33 | 43 |
| 55 | 49 |
| 27 | 34 |
| 30 | 43 |
| 39 | 43 |
| 46 | 36 |
| 36 | 39 |
| 47 | 42 |
| 37 | 58 |

|    |    |
|----|----|
| 46 | 43 |
| 43 | 41 |
| 48 | 37 |
| 40 | 43 |
| 33 | 31 |
| 30 | 45 |
| 46 | 43 |
| 46 | 42 |
| 38 | 38 |
| 42 | 38 |
| 46 | 51 |
| 44 | 44 |
| 39 | 52 |
| 36 | 58 |
| 38 | 30 |
| 37 | 50 |
| 29 | 52 |
| 42 | 38 |
| 37 | 40 |
| 61 | 29 |
| 41 | 62 |
| 50 | 40 |
| 39 | 37 |
| 38 | 38 |
| 34 | 51 |
| 43 | 47 |
| 37 | 48 |
| 37 | 40 |
| 46 | 50 |
| 46 | 44 |
| 48 | 45 |
| 45 | 45 |
| 37 | 43 |
| 49 | 42 |
| 35 | 33 |
| 33 | 65 |
| 49 | 47 |
| 32 | 34 |
| 41 | 48 |
| 44 | 42 |
| 34 | 33 |
| 42 | 41 |
| 28 | 50 |
| 40 | 45 |
| 55 | 28 |
| 38 | 42 |
| 42 | 30 |
| 37 | 70 |
| 47 | 37 |
| 45 | 29 |
| 35 | 29 |
| 42 | 43 |
| 42 | 44 |
| 40 | 30 |
| 36 | 41 |
| 34 | 42 |
| 37 | 53 |
| 36 | 53 |
| 32 | 41 |

|    |    |
|----|----|
| 38 | 27 |
| 56 | 43 |
| 33 | 45 |
| 49 | 43 |
| 39 | 32 |
| 33 | 34 |
| 49 | 49 |
| 39 | 51 |
| 53 | 38 |
| 37 | 38 |
| 42 | 50 |
| 26 | 44 |
| 40 | 42 |
| 32 | 42 |
| 32 | 32 |
| 41 | 44 |
| 40 | 36 |
| 58 | 37 |
| 47 | 46 |
| 45 | 33 |
| 37 | 48 |
| 47 | 45 |
| 32 | 37 |
| 37 | 39 |
| 37 | 43 |
| 35 | 25 |
| 52 | 35 |
| 30 | 45 |
| 61 | 41 |
| 48 | 30 |
| 39 | 46 |
| 43 | 34 |
| 45 | 45 |
| 44 | 42 |
| 44 | 44 |
| 36 | 50 |
| 37 | 36 |
| 40 | 48 |
| 48 | 45 |
| 49 | 39 |
| 40 | 49 |
| 34 | 38 |
| 30 | 45 |
| 45 | 34 |
| 29 | 49 |
| 36 | 58 |
| 32 | 37 |
| 35 | 35 |
| 31 | 39 |
| 46 | 30 |
| 54 | 30 |
| 54 | 32 |
| 36 | 48 |
| 41 | 52 |
| 32 | 45 |
| 30 | 36 |
| 43 | 42 |
| 46 | 44 |
| 49 | 36 |

|    |    |
|----|----|
| 42 | 45 |
| 26 | 47 |
| 38 | 53 |
| 34 | 45 |
| 37 | 49 |
| 38 | 46 |
| 38 | 66 |
| 50 | 28 |
| 41 | 44 |
| 61 | 36 |
| 62 | 34 |
| 41 | 30 |
| 35 | 32 |
| 49 | 45 |
| 49 | 25 |
| 36 | 42 |
| 37 | 35 |
| 29 | 33 |
| 30 | 42 |
| 41 | 37 |
| 47 | 53 |
| 47 | 42 |
| 39 | 49 |
| 48 | 38 |
| 30 | 43 |
| 55 | 41 |
| 32 | 33 |
| 32 | 42 |
| 46 | 43 |
| 51 | 37 |
| 50 | 35 |
| 48 | 40 |
| 54 | 32 |
| 33 | 44 |
| 42 | 39 |
| 54 | 32 |
| 36 | 41 |
| 32 | 54 |
| 51 | 28 |
| 41 | 42 |
| 47 | 42 |
| 40 | 37 |
| 34 | 34 |
| 36 | 27 |
| 34 | 53 |
| 48 | 43 |
| 40 | 39 |
| 51 | 41 |
| 38 | 43 |
| 34 | 46 |
| 37 | 44 |
| 35 | 50 |
| 42 | 41 |
| 34 | 37 |
| 49 | 41 |
| 41 | 53 |
| 48 | 39 |
| 35 | 45 |
| 40 | 37 |

|    |    |
|----|----|
| 42 | 34 |
| 29 | 42 |
| 47 | 33 |
| 42 | 38 |
| 59 | 40 |
| 34 | 31 |
| 54 | 46 |
| 28 | 35 |
| 42 | 42 |
| 54 | 44 |
| 40 | 27 |
| 49 | 44 |
| 58 | 42 |
| 48 | 37 |
| 41 | 43 |
| 46 | 39 |
| 33 | 38 |
| 46 | 33 |
| 44 | 37 |
| 43 | 37 |
| 42 | 35 |
| 35 | 40 |
| 38 | 46 |
| 38 | 51 |
| 36 | 42 |
| 52 | 38 |
| 48 | 36 |
| 43 | 31 |
| 36 | 34 |
| 47 | 47 |
| 37 | 32 |
| 38 | 34 |
| 46 | 44 |
| 27 | 32 |
| 39 | 49 |
| 58 | 36 |
| 41 | 32 |
| 44 | 48 |
| 44 | 39 |
| 39 | 42 |
| 41 | 38 |
| 29 | 47 |
| 44 | 34 |
| 47 | 44 |
| 33 | 44 |
| 36 | 43 |
| 46 | 35 |
| 35 | 32 |
| 44 | 33 |
| 47 | 56 |
| 50 | 35 |
| 36 | 39 |
| 48 | 42 |
| 46 | 36 |
| 43 | 47 |
| 34 | 43 |
| 36 | 42 |
| 31 | 36 |
| 40 | 42 |

|    |    |
|----|----|
| 55 | 31 |
| 47 | 45 |
| 52 | 43 |
| 41 | 47 |
| 31 | 53 |
| 30 | 60 |
| 45 | 30 |
| 44 | 35 |
| 34 | 32 |
| 47 | 51 |
| 44 | 33 |
| 37 | 49 |
| 49 | 38 |
| 50 | 47 |
| 31 | 47 |
| 41 | 36 |
| 33 | 47 |
| 28 | 53 |
| 44 | 35 |
| 43 | 30 |
| 47 | 46 |
| 46 | 38 |
| 41 | 42 |
| 47 | 49 |
| 34 | 35 |
| 47 | 50 |
| 50 | 40 |
| 39 | 45 |
| 34 | 40 |
| 49 | 42 |
| 44 | 28 |
| 27 | 52 |
| 52 | 46 |
| 35 | 41 |
| 37 | 42 |
| 51 | 39 |
| 36 | 30 |
| 41 | 35 |
| 43 | 35 |
| 37 | 45 |
| 58 | 50 |
| 43 | 39 |
| 29 | 41 |
| 36 | 26 |
| 32 | 40 |
| 27 | 44 |
| 35 | 54 |
| 31 | 43 |
| 41 | 41 |
| 35 | 52 |
| 46 | 38 |
| 43 | 29 |
| 49 | 38 |
| 50 | 31 |
| 44 | 32 |
| 33 | 40 |
| 33 | 38 |
| 49 | 33 |
| 40 | 45 |

|    |    |
|----|----|
| 39 | 51 |
| 39 | 33 |
| 38 | 56 |
| 35 | 42 |
| 42 | 29 |
| 30 | 37 |
| 34 | 50 |
| 34 | 37 |
| 36 | 47 |
| 42 | 31 |
| 32 | 41 |
| 40 | 49 |
| 31 | 39 |
| 39 | 33 |
| 30 | 52 |
| 41 | 37 |
| 61 | 39 |
| 42 | 52 |
| 45 | 36 |
| 44 | 33 |
| 41 | 47 |
| 44 | 48 |
| 43 | 40 |
| 43 | 53 |
| 36 | 50 |
| 45 | 39 |
| 39 | 45 |
| 35 | 39 |
| 41 | 52 |
| 27 | 61 |
| 32 | 37 |
| 48 | 38 |
| 39 | 52 |
| 37 | 40 |
| 42 | 32 |
| 40 | 36 |
| 38 | 32 |
| 50 | 31 |
| 50 | 31 |
| 44 | 29 |
| 30 | 31 |
| 39 | 51 |
| 42 | 52 |
| 43 | 36 |
| 37 | 47 |
| 43 | 36 |
| 39 | 30 |
| 33 | 51 |
| 37 | 32 |
| 30 | 46 |
| 38 | 51 |
| 43 | 44 |
| 40 | 31 |
| 40 | 39 |
| 41 | 36 |
| 28 | 45 |
| 29 | 52 |
| 53 | 43 |
| 22 | 47 |

|    |    |
|----|----|
| 30 | 38 |
| 49 | 43 |
| 33 | 54 |
| 45 | 37 |
| 41 | 37 |
| 38 | 38 |
| 45 | 35 |
| 41 | 36 |
| 43 | 37 |
| 32 | 60 |
| 53 | 39 |
| 33 | 52 |
| 37 | 44 |
| 43 | 43 |
| 39 | 36 |
| 41 | 46 |
| 45 | 45 |
| 34 | 43 |
| 39 | 39 |
| 41 | 43 |
| 41 | 48 |
| 36 | 43 |
| 45 | 33 |
| 28 | 53 |
| 44 | 32 |
| 38 | 51 |
| 22 | 45 |
| 32 | 42 |
| 41 | 51 |
| 39 | 30 |
| 39 | 49 |
| 38 | 36 |
| 38 | 46 |
| 31 | 43 |
| 31 | 47 |
| 42 | 34 |
| 37 | 33 |
| 37 | 59 |
| 30 | 37 |
| 40 | 44 |
| 44 | 40 |
| 49 | 31 |
| 42 | 40 |
| 36 | 39 |
| 43 | 47 |
| 43 | 33 |
| 48 | 42 |
| 43 | 46 |
| 44 | 38 |
| 25 | 40 |
| 46 | 33 |
| 56 | 40 |
| 45 | 43 |
| 33 | 53 |
| 28 | 40 |
| 37 | 44 |
| 34 | 44 |
| 34 | 43 |
| 37 | 58 |



|    |    |
|----|----|
| 62 | 42 |
| 54 | 50 |
| 30 | 50 |
| 47 | 42 |
| 43 | 47 |
| 46 | 33 |
| 24 | 39 |
| 50 | 35 |
| 35 | 44 |
| 50 | 44 |
| 56 | 46 |
| 40 | 42 |
| 38 | 35 |
| 55 | 46 |
| 58 | 37 |
| 43 | 32 |
| 45 | 41 |
| 47 | 51 |
| 48 | 47 |
| 38 | 44 |
| 31 | 46 |
| 42 | 44 |
| 52 | 32 |
| 40 | 42 |
| 43 | 36 |
| 62 | 37 |
| 50 | 44 |
| 37 | 48 |
| 51 | 38 |
| 22 | 54 |
| 38 | 45 |
| 34 | 58 |
| 34 | 50 |
| 38 | 51 |
| 45 | 28 |
| 42 | 47 |
| 30 | 43 |
| 39 | 33 |
| 51 | 30 |
| 36 | 39 |
| 47 | 37 |
| 42 | 47 |
| 34 | 28 |
| 35 | 45 |
| 38 | 51 |
| 39 | 40 |
| 41 | 47 |
| 42 | 40 |
| 37 | 42 |
| 42 | 34 |
| 45 | 45 |
| 48 | 41 |
| 41 | 48 |
| 34 | 46 |
| 42 | 33 |
| 48 | 28 |
| 39 | 47 |
| 43 | 47 |
| 44 | 48 |

|    |    |
|----|----|
| 41 | 44 |
| 47 | 47 |
| 55 | 42 |
| 49 | 38 |
| 26 | 34 |
| 54 | 33 |
| 47 | 45 |
| 38 | 36 |
| 31 | 61 |
| 51 | 26 |
| 33 | 43 |
| 27 | 41 |
| 47 | 49 |
| 43 | 47 |
| 40 | 33 |
| 45 | 50 |
| 39 | 50 |
| 45 | 32 |
| 43 | 43 |
| 55 | 30 |
| 55 | 42 |
| 38 | 42 |
| 56 | 41 |
| 41 | 28 |
| 36 | 33 |
| 44 | 37 |
| 37 | 44 |
| 37 | 37 |
| 29 | 56 |
| 45 | 52 |
| 38 | 53 |
| 63 | 41 |
| 43 | 37 |
| 35 | 49 |
| 42 | 32 |
| 44 | 43 |
| 43 | 38 |
| 30 | 48 |

|    |    |
|----|----|
| 47 | 38 |
| 39 | 38 |
| 34 | 51 |
| 45 | 38 |
| 54 | 38 |
| 44 | 36 |
| 43 | 41 |
| 54 | 46 |
| 48 | 50 |
| 52 | 36 |
| 50 | 38 |
| 47 | 44 |
| 28 | 44 |
| 46 | 34 |
| 39 | 37 |
| 46 | 46 |

|    |    |
|----|----|
| 39 | 37 |
| 50 | 30 |
| 37 | 50 |
| 38 | 42 |
| 40 | 44 |
| 33 | 43 |
| 55 | 49 |
| 27 | 34 |
| 30 | 43 |
| 39 | 43 |
| 46 | 36 |
| 36 | 39 |
| 47 | 42 |
| 37 | 58 |
| 46 | 43 |
| 43 | 41 |
| 48 | 37 |
| 40 | 43 |
| 33 | 31 |
| 30 | 45 |
| 46 | 43 |
| 46 | 42 |
| 38 | 38 |
| 42 | 38 |
| 46 | 51 |
| 44 | 44 |
| 39 | 52 |
| 36 | 58 |
| 38 | 30 |
| 37 | 50 |
| 29 | 52 |
| 42 | 38 |
| 37 | 40 |
| 61 | 29 |
| 41 | 62 |
| 50 | 40 |
| 39 | 37 |
| 38 | 38 |
| 34 | 51 |
| 43 | 47 |
| 37 | 48 |
| 37 | 40 |
| 46 | 50 |
| 46 | 44 |
| 48 | 45 |
| 45 | 45 |
| 37 | 43 |
| 49 | 42 |
| 35 | 33 |
| 33 | 65 |
| 49 | 47 |
| 32 | 34 |
| 41 | 48 |
| 44 | 42 |
| 34 | 33 |
| 42 | 41 |
| 28 | 50 |
| 40 | 45 |
| 55 | 28 |

|    |    |
|----|----|
| 38 | 42 |
| 42 | 30 |
| 37 | 70 |
| 47 | 37 |
| 45 | 29 |
| 35 | 29 |
| 42 | 43 |
| 42 | 44 |
| 40 | 30 |
| 36 | 41 |
| 34 | 42 |
| 37 | 53 |
| 36 | 53 |
| 32 | 41 |
| 38 | 27 |
| 56 | 43 |
| 33 | 45 |
| 49 | 43 |
| 39 | 32 |
| 33 | 34 |
| 49 | 49 |
| 39 | 51 |
| 53 | 38 |
| 37 | 38 |
| 42 | 50 |
| 26 | 44 |
| 40 | 42 |
| 32 | 42 |
| 32 | 32 |
| 41 | 44 |
| 40 | 36 |
| 58 | 37 |
| 47 | 46 |
| 45 | 33 |
| 37 | 48 |
| 47 | 45 |
| 32 | 37 |
| 37 | 39 |
| 37 | 43 |
| 35 | 25 |
| 52 | 35 |
| 30 | 45 |
| 61 | 41 |
| 48 | 30 |
| 39 | 46 |
| 43 | 34 |
| 45 | 45 |
| 44 | 42 |
| 44 | 44 |
| 36 | 50 |
| 37 | 36 |
| 40 | 48 |
| 48 | 45 |
| 49 | 39 |
| 40 | 49 |
| 34 | 38 |
| 30 | 45 |
| 45 | 34 |
| 29 | 49 |

|    |    |
|----|----|
| 36 | 58 |
| 32 | 37 |
| 35 | 35 |
| 31 | 39 |
| 46 | 30 |
| 54 | 30 |
| 54 | 32 |
| 36 | 48 |
| 41 | 52 |
| 32 | 45 |
| 30 | 36 |
| 43 | 42 |
| 46 | 44 |
| 49 | 36 |
| 42 | 45 |
| 26 | 47 |
| 38 | 53 |
| 34 | 45 |
| 37 | 49 |
| 38 | 46 |
| 38 | 66 |
| 50 | 28 |
| 41 | 44 |
| 61 | 36 |
| 62 | 34 |
| 41 | 30 |
| 35 | 32 |
| 49 | 45 |
| 49 | 25 |
| 36 | 42 |
| 37 | 35 |
| 29 | 33 |
| 30 | 42 |
| 41 | 37 |
| 47 | 53 |
| 47 | 42 |
| 39 | 49 |
| 48 | 38 |
| 30 | 43 |
| 55 | 41 |
| 32 | 33 |
| 32 | 42 |
| 46 | 43 |
| 51 | 37 |
| 50 | 35 |
| 48 | 40 |
| 54 | 32 |
| 33 | 44 |
| 42 | 39 |
| 54 | 32 |
| 36 | 41 |
| 32 | 54 |
| 51 | 28 |
| 41 | 42 |
| 47 | 42 |
| 40 | 37 |
| 34 | 34 |
| 36 | 27 |
| 34 | 53 |

|    |    |
|----|----|
| 48 | 43 |
| 40 | 39 |
| 51 | 41 |
| 38 | 43 |
| 34 | 46 |
| 37 | 44 |
| 35 | 50 |
| 42 | 41 |
| 34 | 37 |
| 49 | 41 |
| 41 | 53 |
| 48 | 39 |
| 35 | 45 |
| 40 | 37 |
| 42 | 34 |
| 29 | 42 |
| 47 | 33 |
| 42 | 38 |
| 59 | 40 |
| 34 | 31 |
| 54 | 46 |
| 28 | 35 |
| 42 | 42 |
| 54 | 44 |
| 40 | 27 |
| 49 | 44 |
| 58 | 42 |
| 48 | 37 |
| 41 | 43 |
| 46 | 39 |
| 33 | 38 |
| 46 | 33 |
| 44 | 37 |
| 43 | 37 |
| 42 | 35 |
| 35 | 40 |
| 38 | 46 |
| 38 | 51 |
| 36 | 42 |
| 52 | 38 |
| 48 | 36 |
| 43 | 31 |
| 36 | 34 |
| 47 | 47 |
| 37 | 32 |
| 38 | 34 |
| 46 | 44 |
| 27 | 32 |
| 39 | 49 |
| 58 | 36 |
| 41 | 32 |
| 44 | 48 |
| 44 | 39 |
| 39 | 42 |
| 41 | 38 |
| 29 | 47 |
| 44 | 34 |
| 47 | 44 |
| 33 | 44 |

|    |    |
|----|----|
| 36 | 43 |
| 46 | 35 |
| 35 | 32 |
| 44 | 33 |
| 47 | 56 |
| 50 | 35 |
| 36 | 39 |
| 48 | 42 |
| 46 | 36 |
| 43 | 47 |
| 34 | 43 |
| 36 | 42 |
| 31 | 36 |
| 40 | 42 |
| 55 | 31 |
| 47 | 45 |
| 52 | 43 |
| 41 | 47 |
| 31 | 53 |
| 30 | 60 |
| 45 | 30 |
| 44 | 35 |
| 34 | 32 |
| 47 | 51 |
| 44 | 33 |
| 37 | 49 |
| 49 | 38 |
| 50 | 47 |
| 31 | 47 |
| 41 | 36 |
| 33 | 47 |
| 28 | 53 |
| 44 | 35 |
| 43 | 30 |
| 47 | 46 |
| 46 | 38 |
| 41 | 42 |
| 47 | 49 |
| 34 | 35 |
| 47 | 50 |
| 50 | 40 |
| 39 | 45 |
| 34 | 40 |
| 49 | 42 |
| 44 | 28 |
| 27 | 52 |
| 52 | 46 |
| 35 | 41 |
| 37 | 42 |
| 51 | 39 |
| 36 | 30 |
| 41 | 35 |
| 43 | 35 |
| 37 | 45 |
| 58 | 50 |
| 43 | 39 |
| 29 | 41 |
| 36 | 26 |
| 32 | 40 |

|    |    |
|----|----|
| 27 | 44 |
| 35 | 54 |
| 31 | 43 |
| 41 | 41 |
| 35 | 52 |
| 46 | 38 |
| 43 | 29 |
| 49 | 38 |
| 50 | 31 |
| 44 | 32 |
| 33 | 40 |
| 33 | 38 |
| 49 | 33 |
| 40 | 45 |
| 39 | 51 |
| 39 | 33 |
| 38 | 56 |
| 35 | 42 |
| 42 | 29 |
| 30 | 37 |
| 34 | 50 |
| 34 | 37 |
| 36 | 47 |
| 42 | 31 |
| 32 | 41 |
| 40 | 49 |
| 31 | 39 |
| 39 | 33 |
| 30 | 52 |
| 41 | 37 |
| 61 | 39 |
| 42 | 52 |
| 45 | 36 |
| 44 | 33 |
| 41 | 47 |
| 44 | 48 |
| 43 | 40 |
| 43 | 53 |
| 36 | 50 |
| 45 | 39 |
| 39 | 45 |
| 35 | 39 |
| 41 | 52 |
| 27 | 61 |
| 32 | 37 |
| 48 | 38 |
| 39 | 52 |
| 37 | 40 |
| 42 | 32 |
| 40 | 36 |
| 38 | 32 |
| 50 | 31 |
| 50 | 31 |
| 44 | 29 |
| 30 | 31 |
| 39 | 51 |
| 42 | 52 |
| 43 | 36 |
| 37 | 47 |



|    |    |
|----|----|
| 43 | 36 |
| 39 | 30 |
| 33 | 51 |
| 37 | 32 |
| 30 | 46 |
| 38 | 51 |
| 43 | 44 |
| 40 | 31 |
| 40 | 39 |
| 41 | 36 |
| 28 | 45 |
| 29 | 52 |
| 53 | 43 |
| 22 | 47 |
| 30 | 38 |
| 49 | 43 |
| 33 | 54 |
| 45 | 37 |
| 41 | 37 |
| 38 | 38 |
| 45 | 35 |
| 41 | 36 |
| 43 | 37 |
| 32 | 60 |
| 53 | 39 |
| 33 | 52 |
| 37 | 44 |
| 43 | 43 |
| 39 | 36 |
| 41 | 46 |
| 45 | 45 |
| 34 | 43 |
| 39 | 39 |
| 41 | 43 |
| 41 | 48 |
| 36 | 43 |
| 45 | 33 |
| 28 | 53 |
| 44 | 32 |
| 38 | 51 |
| 22 | 45 |
| 32 | 42 |
| 41 | 51 |
| 39 | 30 |
| 39 | 49 |
| 38 | 36 |
| 38 | 46 |
| 31 | 43 |
| 31 | 47 |
| 42 | 34 |
| 37 | 33 |
| 37 | 59 |
| 30 | 37 |
| 40 | 44 |
| 44 | 40 |
| 49 | 31 |
| 42 | 40 |
| 36 | 39 |
| 43 | 47 |

|    |    |
|----|----|
| 43 | 33 |
| 48 | 42 |
| 43 | 46 |
| 44 | 38 |
| 25 | 40 |
| 46 | 33 |
| 56 | 40 |
| 45 | 43 |
| 33 | 53 |
| 28 | 40 |
| 37 | 44 |
| 34 | 44 |
| 34 | 43 |
| 37 | 58 |
| 62 | 42 |
| 54 | 50 |
| 30 | 50 |
| 47 | 42 |
| 43 | 47 |
| 46 | 33 |
| 24 | 39 |
| 50 | 35 |
| 35 | 44 |
| 50 | 44 |
| 56 | 46 |
| 40 | 42 |
| 38 | 35 |
| 55 | 46 |
| 58 | 37 |
| 43 | 32 |
| 45 | 41 |
| 47 | 51 |
| 48 | 47 |
| 38 | 44 |
| 31 | 46 |
| 42 | 44 |
| 52 | 32 |
| 40 | 42 |
| 43 | 36 |
| 62 | 37 |
| 50 | 44 |
| 37 | 48 |
| 51 | 38 |
| 22 | 54 |
| 38 | 45 |
| 34 | 58 |
| 34 | 50 |
| 38 | 51 |
| 45 | 28 |
| 42 | 47 |
| 30 | 43 |
| 39 | 33 |
| 51 | 30 |
| 36 | 39 |
| 47 | 37 |
| 42 | 47 |
| 34 | 28 |
| 35 | 45 |
| 38 | 51 |

|    |    |
|----|----|
| 39 | 40 |
| 41 | 47 |
| 42 | 40 |
| 37 | 42 |
| 42 | 34 |
| 45 | 45 |
| 48 | 41 |
| 41 | 48 |
| 34 | 46 |
| 42 | 33 |
| 48 | 28 |
| 39 | 47 |
| 43 | 47 |
| 44 | 48 |
| 41 | 44 |
| 47 | 47 |
| 55 | 42 |
| 49 | 38 |
| 26 | 34 |
| 54 | 33 |
| 47 | 45 |
| 38 | 36 |
| 31 | 61 |
| 51 | 26 |
| 33 | 43 |
| 27 | 41 |
| 47 | 49 |
| 43 | 47 |
| 40 | 33 |
| 45 | 50 |
| 39 | 50 |
| 45 | 32 |
| 43 | 43 |
| 55 | 30 |
| 55 | 42 |
| 38 | 42 |
| 56 | 41 |
| 41 | 28 |
| 36 | 33 |
| 44 | 37 |
| 37 | 44 |
| 37 | 37 |
| 29 | 56 |
| 45 | 52 |
| 38 | 53 |
| 63 | 41 |
| 43 | 37 |
| 35 | 49 |
| 42 | 32 |
| 44 | 43 |
| 43 | 38 |
| 30 | 48 |
| 43 | 36 |
| 53 | 39 |
| 50 | 32 |
| 44 | 44 |
| 45 | 36 |
| 29 | 54 |
| 44 | 36 |

|    |    |
|----|----|
| 32 | 35 |
| 39 | 50 |
| 32 | 33 |
| 41 | 43 |
| 51 | 47 |
| 37 | 27 |
| 59 | 41 |
| 39 | 39 |
| 46 | 49 |
| 33 | 35 |
| 43 | 55 |
| 51 | 39 |
| 50 | 29 |
| 34 | 42 |
| 40 | 40 |
| 30 | 44 |
| 29 | 36 |
| 36 | 32 |
| 52 | 44 |
| 44 | 38 |
| 34 | 35 |
| 37 | 47 |
| 47 | 37 |
| 44 | 58 |
| 40 | 50 |
| 42 | 34 |
| 35 | 35 |
| 47 | 31 |
| 48 | 35 |
| 44 | 52 |
| 39 | 48 |
| 32 | 35 |
| 42 | 35 |
| 48 | 29 |
| 48 | 40 |
| 44 | 43 |
| 46 | 34 |
| 46 | 39 |
| 34 | 43 |
| 39 | 51 |
| 39 | 34 |
| 50 | 32 |
| 47 | 53 |
| 31 | 44 |
| 63 | 41 |
| 35 | 60 |
| 33 | 47 |
| 40 | 60 |
| 41 | 41 |
| 36 | 38 |
| 49 | 34 |
| 42 | 34 |
| 35 | 33 |
| 46 | 43 |
| 42 | 52 |
| 37 | 34 |
| 35 | 54 |
| 42 | 36 |
| 44 | 34 |

|    |    |
|----|----|
| 48 | 35 |
| 35 | 50 |
| 48 | 38 |
| 25 | 35 |
| 27 | 41 |
| 35 | 37 |
| 42 | 36 |
| 31 | 49 |
| 39 | 47 |
| 36 | 38 |
| 50 | 47 |
| 38 | 39 |
| 36 | 41 |
| 47 | 47 |
| 34 | 39 |
| 41 | 40 |
| 41 | 41 |
| 49 | 42 |
| 28 | 43 |
| 41 | 41 |
| 29 | 49 |
| 38 | 40 |
| 42 | 49 |
| 37 | 40 |
| 42 | 46 |
| 38 | 31 |
| 37 | 50 |
| 34 | 41 |
| 40 | 44 |
| 25 | 50 |
| 54 | 35 |
| 49 | 47 |
| 40 | 52 |
| 30 | 41 |
| 37 | 44 |
| 37 | 40 |
| 38 | 47 |
| 33 | 44 |
| 50 | 39 |
| 37 | 50 |
| 39 |    |
| 54 |    |
| 39 |    |
| 31 |    |
| 42 |    |
| 43 |    |
| 38 |    |
| 45 |    |
| 48 |    |
| 48 |    |
| 44 |    |
| 42 |    |
| 48 |    |
| 42 |    |
| 34 |    |
| 45 |    |
| 45 |    |
| 37 |    |
| 33 |    |

38  
39  
38  
48  
42  
43  
42  
45  
41  
27  
40  
47  
45  
41  
27  
31  
42  
53  
42  
43  
47  
45  
40  
37  
31  
42  
37  
38  
46  
50  
36  
44  
30  
41  
41  
46  
37  
35  
33  
28  
29  
43  
41  
44  
43  
40  
39  
51  
37  
45  
35  
34  
36  
51  
57  
63  
37  
34  
31

30  
44  
41  
35  
48  
42  
39  
24  
44  
50  
44  
46  
41  
43  
40  
50  
45  
38  
51  
42  
42  
44  
45  
51  
37  
34  
42  
43  
33  
39  
45  
41  
38  
43  
36  
46  
51  
43  
35  
46  
28  
37  
37  
44  
45  
40  
35  
41  
42  
47  
42  
44  
35  
39  
46  
52  
47  
35  
32

38  
45  
43  
36  
34  
46  
48  
37  
50  
45  
38  
40  
40  
42  
36  
40  
51  
38  
40  
33  
46  
42  
30  
47  
33  
53  
43  
44  
47  
45
